# Supplementary material for: Comparative analysis of core genome MLST and SNP typing within a European Salmonella serovar Enteritidis outbreak
Source: PubMed Central journal article supplement (PMC5899760; doi:10.1016/j.ijfoodmicro.2018.02.023), 2018-06-02

A (cgMLST)

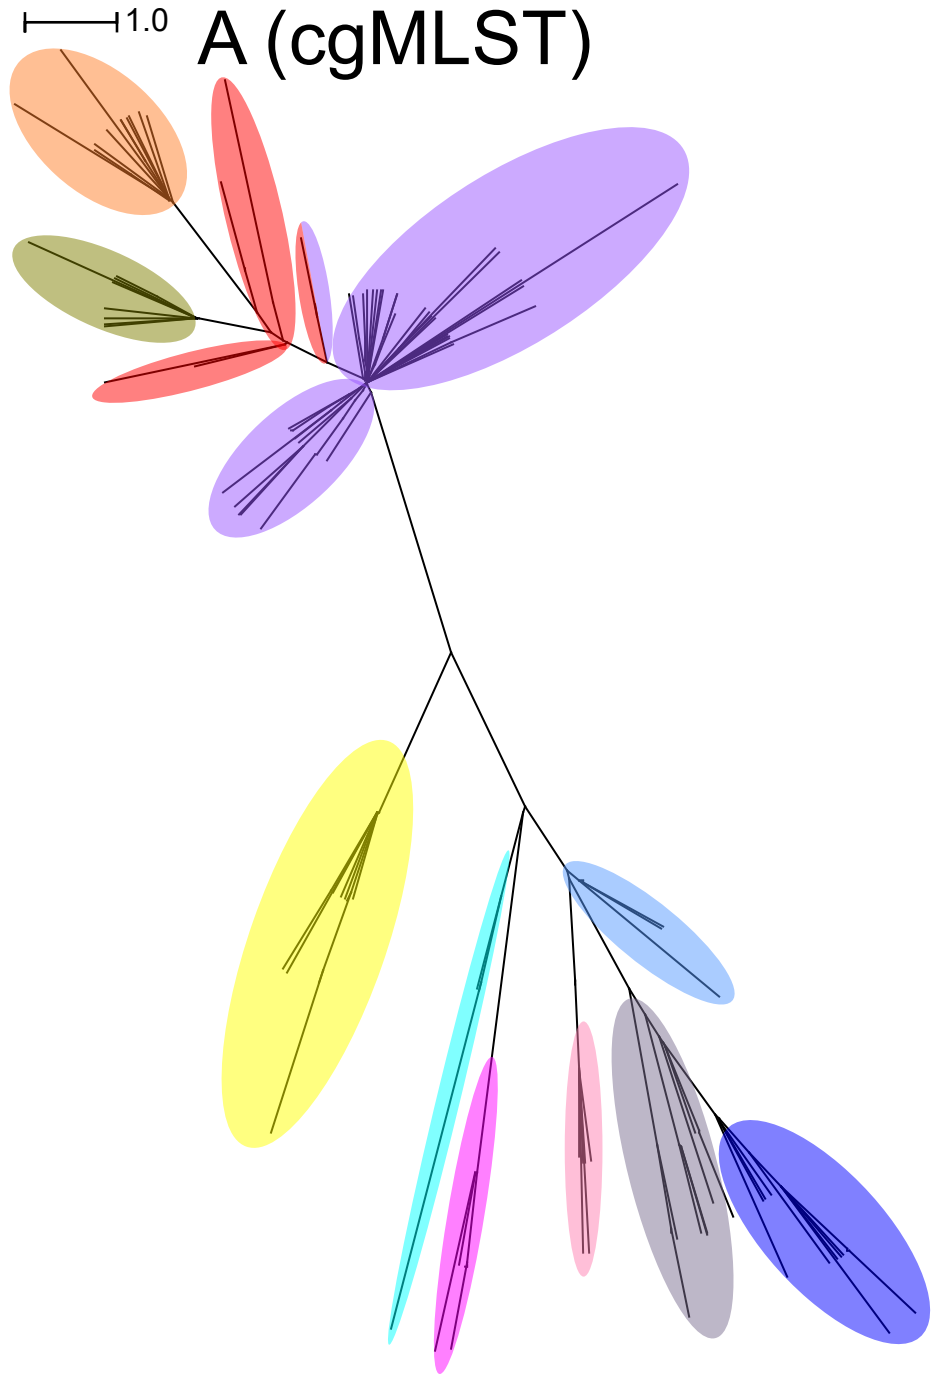

B (SNPs)

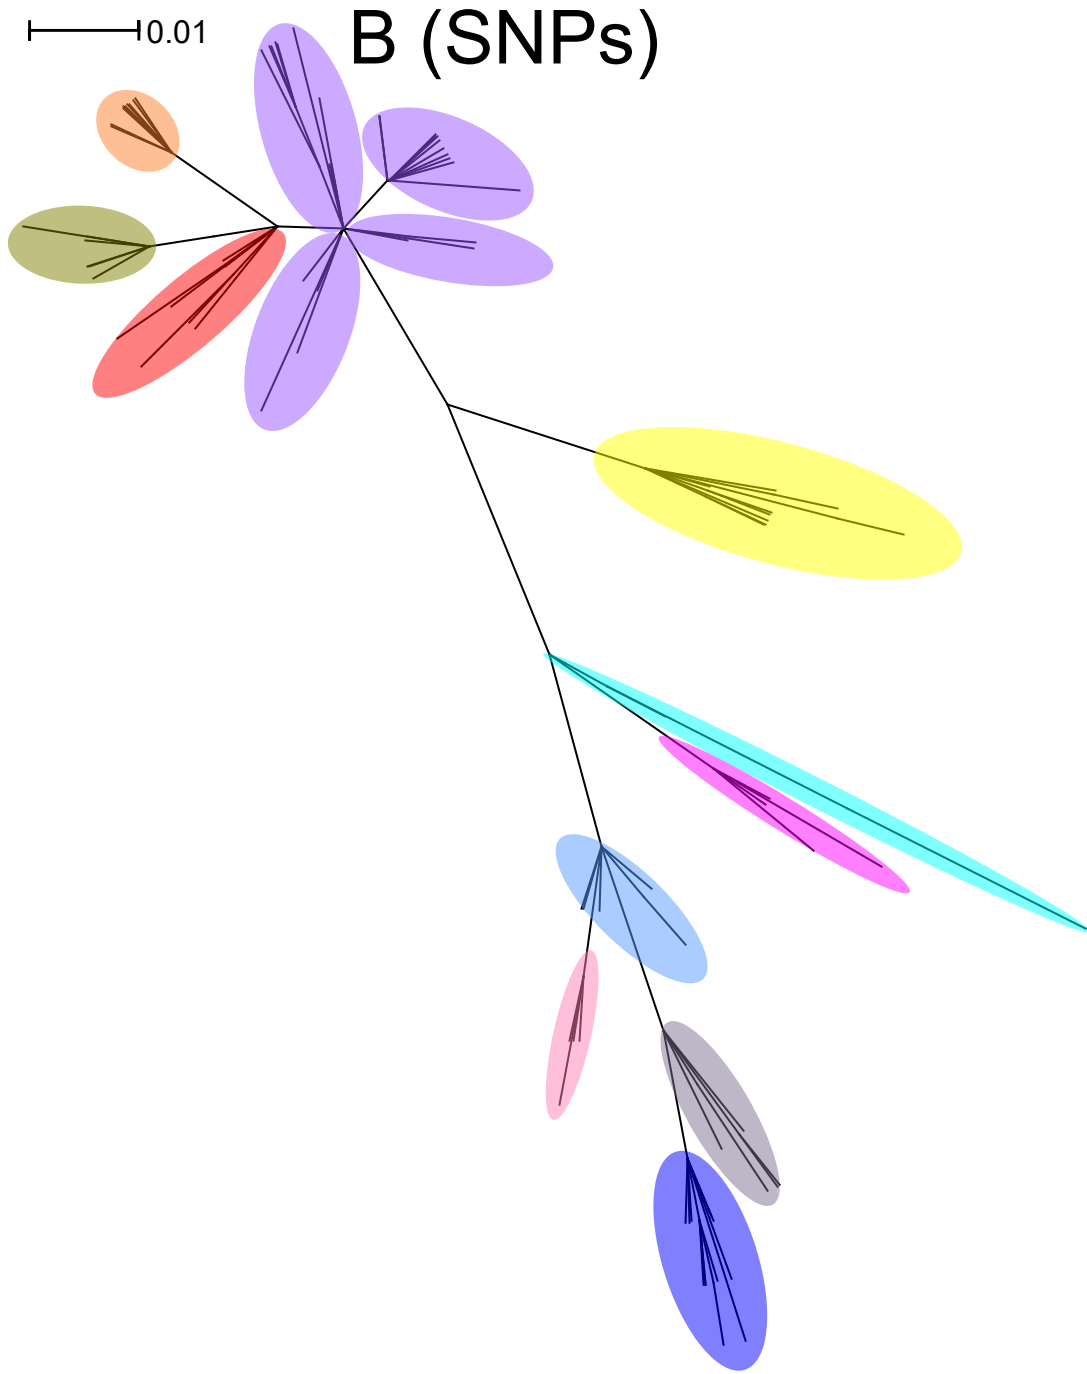

Supplement: mmc1.pdf [file mmc1.pdf]
