# Supplementary material for: Comparative analysis of core genome MLST and SNP typing within a European Salmonella serovar Enteritidis outbreak
Source: PubMed Central journal article supplement (PMC5899760; doi:10.1016/j.ijfoodmicro.2018.02.023), 2018-06-02
Supplement: mmc2.pdf [file mmc2.pdf]

| Enterobase Barcode | Name  | Accession number | Collection Year | Collection Month | Collection Day | Continent | Country        | Serovar     | ST    | SNP Addresses       | dataset A | dataset B | dataset C |
|--------------------|-------|------------------|-----------------|------------------|----------------|-----------|----------------|-------------|-------|---------------------|-----------|-----------|-----------|
| SAL_CA4860AA       | 34199 | SRR1965044       | 2014            |                  | 7              | 24 Europe | United Kingdom | Enteritidis | 2066  | 1.2.3.38.38.38.367  | ✓         | ✓         | ✓         |
| SAL_CA4812AA       | 40793 | SRR1965094       | 2014            |                  | 8              | 12 Europe | United Kingdom | Enteritidis | 26206 | 1.2.3.38.38.38.395  | ✓         | ✓         | ✓         |
| SAL_CA4740AA       | 40799 | SRR1965168       | 2014            |                  | 8              | 15 Europe | United Kingdom | Enteritidis | 26270 | 1.2.3.38.38.38.367  | ✓         | ✓         | ✓         |
| SAL_CA4651AA       | 25341 | SRR1965266       | 2014            |                  | 6              | 25 Europe | United Kingdom | Enteritidis | 26347 | 1.2.3.38.38.38.38   | ✓         | ✓         | ✓         |
| SAL_CA4566AA       | 50361 | SRR1965353       | 2014            |                  | 9              | 4 Europe  | United Kingdom | Enteritidis | 2066  | 1.2.3.38.38.38.413  | ✓         | ✓         | ✓         |
| SAL_CA4560AA       | 38361 | SRR1965359       | 2014            |                  | 7              | 28 Europe | United Kingdom | Enteritidis | 2066  | 1.2.3.38.38.38.367  | ✓         | ✓         | ✓         |
| SAL_CA4550AA       | 38314 | SRR1965369       | 2014            |                  | 7              | 29 Europe | United Kingdom | Enteritidis | 26438 | 1.2.3.38.38.38.367  | ✓         | ✓         | ✓         |
| SAL_CA4544AA       | 32523 | SRR1965375       | 2014            |                  | 7              | 15 Europe | United Kingdom | Enteritidis | 7153  | 1.2.3.38.38.38.393  | ✓         | ✓         | ✓         |
| SAL_CA4510AA       | 38420 | SRR1965410       | 2014            |                  | 7              | 29 Europe | United Kingdom | Enteritidis | 26468 | 1.2.3.38.38.38.413  | ✓         | ✓         | ✓         |
| SAL_CA4496AA       | 37823 | SRR1965424       | 2014            |                  | 7              | 30 Europe | United Kingdom | Enteritidis | 26481 | 1.2.3.38.38.38.393  | ✓         | ✓         | ✓         |
| SAL_CA4462AA       | 38418 | SRR1965458       | 2014            |                  | 7              | 30 Europe | United Kingdom | Enteritidis | 26511 | 1.2.3.38.38.38.413  | ✓         | ✓         | ✓         |
| SAL_CA4457AA       | 38311 | SRR1965464       | 2014            |                  | 7              | 29 Europe | United Kingdom | Enteritidis | 26516 | 1.2.3.38.38.38.367  | ✓         | ✓         | ✓         |
| SAL_CA4417AA       | 37832 | SRR1965506       | 2014            |                  | 7              | 31 Europe | United Kingdom | Enteritidis | 26550 | 1.2.3.38.38.38.2451 | ✓         | ✓         | ✓         |
| SAL_CA4391AA       | 37819 | SRR1965533       | 2014            |                  | 7              | 29 Europe | United Kingdom | Enteritidis | 2066  | 1.2.3.38.38.38.413  | ✓         | ✓         | ✓         |
| SAL_CA4375AA       | 21777 | SRR1965549       | 2014            |                  | 6              | 12 Europe | United Kingdom | Enteritidis | 26585 | 1.2.3.38.38.38.38   | ✓         | ✓         | ✓         |
| SAL_CA4343AA       | 38766 | SRR1965590       | 2014            |                  | 8              | 5 Europe  | United Kingdom | Enteritidis | 2066  | 1.2.3.38.38.38.367  | ✓         | ✓         | ✓         |
| SAL_CA4339AA       | 38426 | SRR1965596       | 2014            |                  | 7              | 28 Europe | United Kingdom | Enteritidis | 26616 | 1.2.3.38.38.38.367  | ✓         | ✓         | ✓         |
| SAL_CA4312AA       | 38421 | SRR1965623       | 2014            |                  | 7              | 29 Europe | United Kingdom | Enteritidis | 26639 | 1.2.3.38.38.38.413  | ✓         | ✓         | ✓         |
| SAL_CA4259AA       | 31929 | SRR1965679       | 2014            |                  | 7              | 21 Europe | United Kingdom | Enteritidis | 26685 | 1.2.3.38.38.38.367  | ✓         | ✓         | ✓         |
| SAL_CA4247AA       | 38425 | SRR1965692       | 2014            |                  | 7              | 29 Europe | United Kingdom | Enteritidis | 26696 | 1.2.3.38.38.38.1072 | ✓         | ✓         | ✓         |
| SAL_CA4240AA       | 37828 | SRR1965700       | 2014            |                  | 7              | 28 Europe | United Kingdom | Enteritidis | 26702 | 1.2.3.38.38.38.367  | ✓         | ✓         | ✓         |
| SAL_CA4176AA       | 36522 | SRR1965772       | 2014            |                  | 7              | 23 Europe | United Kingdom | Enteritidis | 26757 | 1.2.3.38.38.38.2621 | ✓         | ✓         | ✓         |
| SAL_CA4151AA       | 37808 | SRR1965800       | 2014            |                  | 7              | 31 Europe | United Kingdom | Enteritidis | 7612  | 1.2.3.38.38.38.367  | ✓         | ✓         | ✓         |
| SAL_CA4000AA       | 34176 | SRR1965958       | 2014            |                  | 7              | 21 Europe | United Kingdom | Enteritidis | 26909 | 1.2.3.38.38.38.393  | ✓         | ✓         | ✓         |
| SAL_CA3971AA       | 31976 | SRR1965987       | 2014            |                  | 7              | 23 Europe | United Kingdom | Enteritidis | 26936 | 1.2.3.38.38.38.393  | ✓         | ✓         | ✓         |
| SAL_CA3877AA       | 32462 | SRR1966087       | 2014            |                  | 7              | 15 Europe | United Kingdom | Enteritidis | 27020 | 1.2.3.38.38.38.367  | ✓         | ✓         | ✓         |
| SAL_CA3860AA       | 31973 | SRR1966105       | 2014            |                  | 7              | 22 Europe | United Kingdom | Enteritidis | 27036 | 1.2.3.38.38.38.393  | ✓         | ✓         | ✓         |
| SAL_CA3836AA       | 37831 | SRR1966129       | 2014            |                  | 7              | 30 Europe | United Kingdom | Enteritidis | 27057 | 1.2.3.38.38.38.367  | ✓         | ✓         | ✓         |
| SAL_CA3814AA       | 31967 | SRR1966151       | 2014            |                  | 7              | 26 Europe | United Kingdom | Enteritidis | 2066  | 1.2.3.38.38.38.367  | ✓         | ✓         | ✓         |
| SAL_CA3772AA       | 39453 | SRR1966194       | 2014            |                  | 7              | 29 Europe | United Kingdom | Enteritidis | 27108 | 1.2.3.38.38.38.367  | ✓         | ✓         | ✓         |
| SAL_CA3742AA       | 46580 | SRR1966225       | 2014            |                  | 7              | 17 Europe | United Kingdom | Enteritidis | 27137 | 1.2.3.38.38.38.367  | ✓         | ✓         | ✓         |
| SAL_CA3727AA       | 31980 | SRR1966240       | 2014            |                  | 7              | 25 Europe | United Kingdom | Enteritidis | 2066  | 1.2.3.38.38.38.367  | ✓         | ✓         | ✓         |
| SAL_CA3628AA       | 34178 | SRR1966339       | 2014            |                  | 7              | 17 Europe | United Kingdom | Enteritidis | 26229 | 1.2.3.38.38.38.393  | ✓         | ✓         | ✓         |
| SAL_CA3618AA       | 36521 | SRR1966349       | 2014            |                  | 7              | 24 Europe | United Kingdom | Enteritidis | 7612  | 1.2.3.38.38.38.367  | ✓         | ✓         | ✓         |
| SAL_CA3584AA       | 46585 | SRR1966383       | 2014            |                  | 7              | 18 Europe | United Kingdom | Enteritidis | 27283 | 1.2.3.38.38.38.393  | ✓         | ✓         | ✓         |
| SAL_CA3580AA       | 31928 | SRR1966387       | 2014            |                  | 7              | 21 Europe | United Kingdom | Enteritidis | 27287 | 1.2.3.38.38.38.367  | ✓         | ✓         | ✓         |
| SAL_CA3518AA       | 21778 | SRR1966448       | 2014            |                  | 6              | 12 Europe | United Kingdom | Enteritidis | 674   | 1.2.3.38.38.38.38   | ✓         | ✓         | ✓         |
| SAL_CA3488AA       | 68909 | SRR1966478       | 2014            |                  | 6              | 24 Europe | United Kingdom | Enteritidis | 27371 | 1.2.3.38.38.38.38   | ✓         | ✓         | ✓         |
| SAL_CA3480AA       | 38318 | SRR1966486       | 2014            |                  | 7              | 28 Europe | United Kingdom | Enteritidis | 27379 | 1.2.3.38.38.38.367  | ✓         | ✓         | ✓         |
| SAL_CA3459AA       | 37812 | SRR1966507       | 2014            |                  | 7              | 31 Europe | United Kingdom | Enteritidis | 27399 | 1.2.3.38.38.38.367  | ✓         | ✓         | ✓         |
| SAL_CA3413AA       | 31922 | SRR1966554       | 2014            |                  | 7              | 21 Europe | United Kingdom | Enteritidis | 7612  | 1.2.3.38.38.38.367  | ✓         | ✓         | ✓         |
| SAL_CA3385AA       | 23473 | SRR1966582       | 2014            |                  | 6              | 13 Europe | United Kingdom | Enteritidis | 27459 | 1.2.3.38.38.38.1116 | ✓         | ✓         | ✓         |
| SAL_CA3363AA       | 36498 | SRR1966605       | 2014            |                  | 7              | 28 Europe | United Kingdom | Enteritidis | 27476 | 1.2.3.38.38.38.367  | ✓         | ✓         | ✓         |
| SAL_CA3279AA       | 39455 | SRR1966692       | 2014            |                  | 7              | 30 Europe | United Kingdom | Enteritidis | 27552 | 1.2.3.38.38.38.367  | ✓         | ✓         | ✓         |
| SAL_CA3247AA       | 34194 | SRR1966724       | 2014            |                  | 7              | 24 Europe | United Kingdom | Enteritidis | 7153  | 1.2.3.38.38.38.393  | ✓         | ✓         | ✓         |

|              |       |            |      |   |    |        |                |             |       |                     |   |   |   |
|--------------|-------|------------|------|---|----|--------|----------------|-------------|-------|---------------------|---|---|---|
| SAL_CA3216AA | 38316 | SRR1966755 | 2014 | 7 | 28 | Europe | United Kingdom | Enteritidis | 27608 | 1.2.3.38.38.38.367  | ✓ | ✓ | ✓ |
| SAL_CA3141AA | 32459 | SRR1966830 | 2014 | 7 | 17 | Europe | United Kingdom | Enteritidis | 2066  | 1.2.3.38.38.38.367  | ✓ | ✓ | ✓ |
| SAL_CA3120AA | 34189 | SRR1966851 | 2014 | 7 | 25 | Europe | United Kingdom | Enteritidis | 27688 | 1.2.3.38.38.38.367  | ✓ | ✓ | ✓ |
| SAL_CA3048AA | 37833 | SRR1966923 | 2014 | 7 | 30 | Europe | United Kingdom | Enteritidis | 27750 | 1.2.3.38.38.38.367  | ✓ | ✓ | ✓ |
| SAL_CA3034AA | 36525 | SRR1966937 | 2014 | 7 | 24 | Europe | United Kingdom | Enteritidis | 27763 | 1.2.3.38.38.38.393  | ✓ | ✓ | ✓ |
| SAL_CA3002AA | 38313 | SRR1966969 | 2014 | 7 | 28 | Europe | United Kingdom | Enteritidis | 27792 | 1.2.3.38.38.38.367  | ✓ | ✓ | ✓ |
| SAL_CA3000AA | 38319 | SRR1966971 | 2014 | 7 | 28 | Europe | United Kingdom | Enteritidis | 27794 | 1.2.3.38.38.38.393  | ✓ | ✓ | ✓ |
| SAL_CA2969AA | 36501 | SRR1967002 | 2014 | 7 | 17 | Europe | United Kingdom | Enteritidis | 27822 | 1.2.3.38.38.38.393  | ✓ | ✓ | ✓ |
| SAL_CA2943AA | 38419 | SRR1967028 | 2014 | 7 | 29 | Europe | United Kingdom | Enteritidis | 27844 | 1.2.3.38.38.38.413  | ✓ | ✓ | ✓ |
| SAL_CA2932AA | 46591 | SRR1967039 | 2014 | 7 | 18 | Europe | United Kingdom | Enteritidis | 27852 | 1.2.3.38.38.38.367  | ✓ | ✓ | ✓ |
| SAL_CA2891AA | 34186 | SRR1967080 | 2014 | 7 | 25 | Europe | United Kingdom | Enteritidis | 2066  | 1.2.3.38.38.38.367  | ✓ | ✓ | ✓ |
| SAL_CA2886AA | 32472 | SRR1967085 | 2014 | 7 | 18 | Europe | United Kingdom | Enteritidis | 2066  | 1.2.3.38.38.38.367  | ✓ | ✓ | ✓ |
| SAL_CA2882AA | 36524 | SRR1967089 | 2014 | 7 | 22 | Europe | United Kingdom | Enteritidis | 27888 | 1.2.3.38.38.38.367  | ✓ | ✓ | ✓ |
| SAL_CA2872AA | 21776 | SRR1967099 | 2014 | 6 | 3  | Europe | United Kingdom | Enteritidis | 27897 | 1.2.3.38.38.38.38   | ✓ | ✓ | ✓ |
| SAL_CA2811AA | 23472 | SRR1967160 | 2014 | 6 | 13 | Europe | United Kingdom | Enteritidis | 27950 | 1.2.3.38.38.38.38   | ✓ | ✓ | ✓ |
| SAL_CA2801AA | 37807 | SRR1967170 | 2014 | 7 | 28 | Europe | United Kingdom | Enteritidis | 27959 | 1.2.3.38.38.38.2542 | ✓ | ✓ | ✓ |
| SAL_CA2797AA | 34185 | SRR1967174 | 2014 | 7 | 22 | Europe | United Kingdom | Enteritidis | 7153  | 1.2.3.38.38.38.393  | ✓ | ✓ | ✓ |
| SAL_CA2792AA | 39450 | SRR1967179 | 2014 | 7 | 23 | Europe | United Kingdom | Enteritidis | 27967 | 1.2.3.38.38.38.367  | ✓ | ✓ | ✓ |
| SAL_CA2786AA | 34196 | SRR1967185 | 2014 | 7 | 25 | Europe | United Kingdom | Enteritidis | 27973 | 1.2.3.38.38.38.367  | ✓ | ✓ | ✓ |
| SAL_CA2743AA | 21770 | SRR1967228 | 2014 | 6 | 6  | Europe | United Kingdom | Enteritidis | 674   | 1.2.3.38.38.38.38   | ✓ | ✓ | ✓ |
| SAL_CA2688AA | 24040 | SRR1967283 | 2014 | 6 | 20 | Europe | United Kingdom | Enteritidis | 28055 | 1.2.3.38.38.38.604  | ✓ | ✓ | ✓ |
| SAL_CA2685AA | 34197 | SRR1967286 | 2014 | 7 | 24 | Europe | United Kingdom | Enteritidis | 2066  | 1.2.3.38.38.38.367  | ✓ | ✓ | ✓ |
| SAL_CA2664AA | 24986 | SRR1967307 | 2014 | 6 | 28 | Europe | United Kingdom | Enteritidis | 28076 | 1.2.3.38.38.38.472  | ✓ | ✓ | ✓ |
| SAL_CA2593AA | 38317 | SRR1967378 | 2014 | 7 | 28 | Europe | United Kingdom | Enteritidis | 28141 | 1.2.3.38.38.38.367  | ✓ | ✓ | ✓ |
| SAL_CA2588AA | 34184 | SRR1967383 | 2014 | 7 | 22 | Europe | United Kingdom | Enteritidis | 28146 | 1.2.3.38.38.38.393  | ✓ | ✓ | ✓ |
| SAL_CA2509AA | 32463 | SRR1967462 | 2014 | 7 | 17 | Europe | United Kingdom | Enteritidis | 28214 | 1.2.3.38.38.38.367  | ✓ | ✓ | ✓ |
| SAL_CA2492AA | 37809 | SRR1967479 | 2014 | 7 | 29 | Europe | United Kingdom | Enteritidis | 7612  | 1.2.3.38.38.38.367  | ✓ | ✓ | ✓ |
| SAL_CA2423AA | 31923 | SRR1967548 | 2014 | 7 | 23 | Europe | United Kingdom | Enteritidis | 28289 | 1.2.3.38.38.38.367  | ✓ | ✓ | ✓ |
| SAL_CA2371AA | 46589 | SRR1967600 | 2014 | 7 | 17 | Europe | United Kingdom | Enteritidis | 28335 | 1.2.3.38.38.38.367  | ✓ | ✓ | ✓ |
| SAL_CA2362AA | 36464 | SRR1967609 | 2014 | 7 | 25 | Europe | United Kingdom | Enteritidis | 2066  | 1.2.3.38.38.38.367  | ✓ | ✓ | ✓ |
| SAL_CA2205AA | 38371 | SRR1967766 | 2014 | 7 | 28 | Europe | United Kingdom | Enteritidis | 28478 | 1.2.3.38.38.38.367  | ✓ | ✓ | ✓ |
| SAL_CA2200AA | 36526 | SRR1967771 | 2014 | 7 | 28 | Europe | United Kingdom | Enteritidis | 2066  | 1.2.3.38.38.38.367  | ✓ | ✓ | ✓ |
| SAL_CA2199AA | 36531 | SRR1967772 | 2014 | 7 | 29 | Europe | United Kingdom | Enteritidis | 28483 | 1.2.3.38.38.38.2321 | ✓ | ✓ | ✓ |
| SAL_CA2191AA | 24038 | SRR1967780 | 2014 | 6 | 23 | Europe | United Kingdom | Enteritidis | 28491 | 1.2.3.38.38.38.472  | ✓ | ✓ | ✓ |
| SAL_CA2184AA | 31974 | SRR1967787 | 2014 | 7 | 25 | Europe | United Kingdom | Enteritidis | 28497 | 1.2.3.38.38.38.393  | ✓ | ✓ | ✓ |
| SAL_CA2113AA | 31968 | SRR1967858 | 2014 | 7 | 26 | Europe | United Kingdom | Enteritidis | 28559 | 1.2.3.38.38.38.367  | ✓ | ✓ | ✓ |
| SAL_CA2084AA | 38332 | SRR1967887 | 2014 | 7 | 25 | Europe | United Kingdom | Enteritidis | 2066  | 1.2.3.38.38.38.1809 | ✓ | ✓ | ✓ |
| SAL_CA1889AA | 32466 | SRR1967989 | 2014 | 7 | 18 | Europe | United Kingdom | Enteritidis | 28675 | 1.2.3.38.38.38.393  | ✓ | ✓ | ✓ |
| SAL_CA1784AA | 37810 | SRR1968043 | 2014 | 7 | 29 | Europe | United Kingdom | Enteritidis | 28721 | 1.2.3.38.38.38.367  | ✓ | ✓ | ✓ |
| SAL_CA1771AA | 38417 | SRR1968051 | 2014 | 7 | 28 | Europe | United Kingdom | Enteritidis | 28729 | 1.2.3.38.38.38.413  | ✓ | ✓ | ✓ |
| SAL_CA1654AA | 37827 | SRR1968120 | 2014 | 7 | 24 | Europe | United Kingdom | Enteritidis | 28815 | 1.2.3.38.38.38.367  | ✓ | ✓ | ✓ |
| SAL_CA1478AA | 31917 | SRR1968213 | 2014 | 7 | 18 | Europe | United Kingdom | Enteritidis | 28978 | 1.2.3.38.38.38.668  | ✓ | ✓ | ✓ |
| SAL_CA1253AA | 46590 | SRR1968332 | 2014 | 7 | 17 | Europe | United Kingdom | Enteritidis | 29082 | 1.2.3.38.38.38.367  | ✓ | ✓ | ✓ |
| SAL_CA1071AA | 46579 | SRR1968486 | 2014 | 7 | 17 | Europe | United Kingdom | Enteritidis | 29224 | 1.2.3.38.38.38.367  | ✓ | ✓ | ✓ |
| SAL_CA0907AA | 40235 | SRR1968516 | 2014 | 8 | 12 | Europe | United Kingdom | Enteritidis | 29251 | 1.2.3.38.38.38.413  | ✓ | ✓ | ✓ |
| SAL_CA0885AA | 37817 | SRR1968529 | 2014 | 7 | 26 | Europe | United Kingdom | Enteritidis | 27851 | 1.2.3.38.38.38.367  | ✓ | ✓ | ✓ |

|              |       |            |      |   |    |        |                |             |       |                     |   |   |   |
|--------------|-------|------------|------|---|----|--------|----------------|-------------|-------|---------------------|---|---|---|
| SAL_CA0837AA | 37825 | SRR1968556 | 2014 | 7 | 28 | Europe | United Kingdom | Enteritidis | 29305 | 1.2.3.38.38.38.808  | ✓ | ✓ | ✓ |
| SAL_CA0821AA | 31972 | SRR1968564 | 2014 | 7 | 25 | Europe | United Kingdom | Enteritidis | 2066  | 1.2.3.38.38.38.367  | ✓ | ✓ | ✓ |
| SAL_CA0770AA | 38422 | SRR1968589 | 2014 | 7 | 25 | Europe | United Kingdom | Enteritidis | 29363 | 1.2.3.38.38.38.413  | ✓ | ✓ | ✓ |
| SAL_CA0763AA | 34188 | SRR1968592 | 2014 | 7 | 25 | Europe | United Kingdom | Enteritidis | 29369 | 1.2.3.38.38.38.367  | ✓ | ✓ | ✓ |
| SAL_CA0694AA | 37813 | SRR1968627 | 2014 | 7 | 31 | Europe | United Kingdom | Enteritidis | 29430 | 1.2.3.38.38.38.367  | ✓ | ✓ | ✓ |
| SAL_CA0644AA | 38344 | SRR1968654 | 2014 | 7 | 28 | Europe | United Kingdom | Enteritidis | 26229 | 1.2.3.38.38.38.393  | ✓ | ✓ | ✓ |
| SAL_CA0472AA | 31966 | SRR1968746 | 2014 | 7 | 25 | Europe | United Kingdom | Enteritidis | 29612 | 1.2.3.38.38.38.367  | ✓ | ✓ | ✓ |
| SAL_CA0378AA | 37811 | SRR1968796 | 2014 | 7 | 28 | Europe | United Kingdom | Enteritidis | 29695 | 1.2.3.38.38.38.367  | ✓ | ✓ | ✓ |
| SAL_CA0306AA | 38325 | SRR1968832 | 2014 | 7 | 30 | Europe | United Kingdom | Enteritidis | 29759 | 1.2.3.38.38.38.367  | ✓ | ✓ | ✓ |
| SAL_CA0244AA | 23462 | SRR1968861 | 2014 | 6 | 10 | Europe | United Kingdom | Enteritidis | 29811 | 1.2.3.38.38.38.38   | ✓ | ✓ | ✓ |
| SAL_CA0199AA | 41984 | SRR1968882 | 2014 | 8 | 14 | Europe | United Kingdom | Enteritidis | 29839 | 1.2.3.38.38.38.2248 | ✓ | ✓ | ✓ |
| SAL_CA0163AA | 34175 | SRR1968899 | 2014 | 7 | 22 | Europe | United Kingdom | Enteritidis | 29860 | 1.2.3.38.38.38.537  | ✓ | ✓ | ✓ |
| SAL_CA0150AA | 34177 | SRR1968906 | 2014 | 7 | 22 | Europe | United Kingdom | Enteritidis | 7153  | 1.2.3.38.38.38.393  | ✓ | ✓ | ✓ |
| SAL_CA0106AA | 38369 | SRR1968929 | 2014 | 7 | 30 | Europe | United Kingdom | Enteritidis | 29905 | 1.2.3.38.38.38.367  | ✓ | ✓ | ✓ |
| SAL_BA9962AA | 32471 | SRR1969002 | 2014 | 7 | 20 | Europe | United Kingdom | Enteritidis | 30022 | 1.2.3.38.38.38.367  | ✓ | ✓ | ✓ |
| SAL_BA9960AA | 23493 | SRR1969003 | 2014 | 6 | 19 | Europe | United Kingdom | Enteritidis | 30024 | 1.2.3.38.38.38.38   | ✓ | ✓ | ✓ |
| SAL_BA9938AA | 24039 | SRR1969015 | 2014 | 6 | 23 | Europe | United Kingdom | Enteritidis | 30043 | 1.2.3.38.38.38.472  | ✓ | ✓ | ✓ |
| SAL_BA9923AA | 36395 | SRR1969024 | 2014 | 8 | 3  | Europe | United Kingdom | Enteritidis | 30055 | 1.2.3.38.38.38.367  | ✓ | ✓ | ✓ |
| SAL_BA9834AA | 46586 | SRR1969069 | 2014 | 7 | 14 | Europe | United Kingdom | Enteritidis | 30125 | 1.2.3.38.38.38.393  | ✓ | ✓ | ✓ |
| SAL_BA9822AA | 34181 | SRR1969076 | 2014 | 7 | 22 | Europe | United Kingdom | Enteritidis | 30135 | 1.2.3.38.38.38.393  | ✓ | ✓ | ✓ |
| SAL_BA9738AA | 36518 | SRR1969134 | 2014 | 7 | 23 | Europe | United Kingdom | Enteritidis | 2066  | 1.2.3.38.38.38.367  | ✓ | ✓ | ✓ |
| SAL_BA9594AA | 34179 | SRR1969206 | 2014 | 7 | 21 | Europe | United Kingdom | Enteritidis | 30306 | 1.2.3.38.38.38.393  | ✓ | ✓ | ✓ |
| SAL_BA9466AA | 39452 | SRR1969276 | 2014 | 7 | 28 | Europe | United Kingdom | Enteritidis | 30409 | 1.2.3.38.38.38.367  | ✓ | ✓ | ✓ |
| SAL_BA9440AA | 38315 | SRR1969298 | 2014 | 7 | 28 | Europe | United Kingdom | Enteritidis | 29305 | 1.2.3.38.38.38.367  | ✓ | ✓ | ✓ |
| SAL_BA9436AA | 37798 | SRR1969301 | 2014 | 7 | 28 | Europe | United Kingdom | Enteritidis | 30436 | 1.2.3.38.38.38.367  | ✓ | ✓ | ✓ |
| SAL_BA9403AA | 39454 | SRR1969334 | 2014 | 7 | 28 | Europe | United Kingdom | Enteritidis | 2066  | 1.2.3.38.38.38.367  | ✓ | ✓ | ✓ |
| SAL_BA9397AA | 26641 | SRR1969340 | 2014 | 6 | 26 | Europe | United Kingdom | Enteritidis | 26971 | 1.2.3.38.38.38.472  | ✓ | ✓ | ✓ |
| SAL_BA9388AA | 27771 | SRR1969349 | 2014 | 6 | 26 | Europe | United Kingdom | Enteritidis | 30473 | 1.2.3.38.38.38.472  | ✓ | ✓ | ✓ |
| SAL_BA9365AA | 46583 | SRR1969372 | 2014 | 7 | 14 | Europe | United Kingdom | Enteritidis | 30496 | 1.2.3.38.38.38.393  | ✓ | ✓ | ✓ |
| SAL_BA9337AA | 37834 | SRR1969400 | 2014 | 7 | 31 | Europe | United Kingdom | Enteritidis | 30520 | 1.2.3.38.38.38.367  | ✓ | ✓ | ✓ |
| SAL_BA9321AA | 38779 | SRR1969416 | 2014 | 8 | 7  | Europe | United Kingdom | Enteritidis | 2066  | 1.2.3.38.38.38.413  | ✓ | ✓ | ✓ |
| SAL_BA9293AA | 21783 | SRR1969436 | 2014 | 6 | 5  | Europe | United Kingdom | Enteritidis | 30553 | 1.2.3.38.38.38.38   | ✓ | ✓ | ✓ |
| SAL_BA9114AA | 21779 | SRR1969526 | 2014 | 6 | 12 | Europe | United Kingdom | Enteritidis | 674   | 1.2.3.38.38.38.38   | ✓ | ✓ | ✓ |
| SAL_BA8951AA | 36530 | SRR1969546 | 2014 | 7 | 28 | Europe | United Kingdom | Enteritidis | 2066  | 1.2.3.38.38.38.367  | ✓ | ✓ | ✓ |
| SAL_BA8852AA | 32460 | SRR1969597 | 2014 | 7 | 16 | Europe | United Kingdom | Enteritidis | 30907 | 1.2.3.38.38.38.367  | ✓ | ✓ | ✓ |
| SAL_BA8844AA | 31652 | SRR1969601 | 2014 | 7 | 9  | Europe | United Kingdom | Enteritidis | 30913 | 1.2.3.38.38.38.393  | ✓ | ✓ | ✓ |
| SAL_BA8588AA | 37799 | SRR1969732 | 2014 | 8 | 1  | Europe | United Kingdom | Enteritidis | 31130 | 1.2.3.38.38.38.367  | ✓ | ✓ | ✓ |
| SAL_BA8536AA | 36516 | SRR1969758 | 2014 | 7 | 21 | Europe | United Kingdom | Enteritidis | 27476 | 1.2.3.38.38.38.367  | ✓ | ✓ | ✓ |
| SAL_BA8449AA | 37829 | SRR1969802 | 2014 | 7 | 28 | Europe | United Kingdom | Enteritidis | 28289 | 1.2.3.38.38.38.367  | ✓ | ✓ | ✓ |
| SAL_BA8444AA | 37815 | SRR1969805 | 2014 | 7 | 30 | Europe | United Kingdom | Enteritidis | 28289 | 1.2.3.38.38.38.367  | ✓ | ✓ | ✓ |
| SAL_BA8378AA | 37826 | SRR1969838 | 2014 | 7 | 28 | Europe | United Kingdom | Enteritidis | 2066  | 1.2.3.38.38.38.367  | ✓ | ✓ | ✓ |
| SAL_BA8205AA | 34204 | SRR1969924 | 2014 | 7 | 28 | Europe | United Kingdom | Enteritidis | 31423 | 1.2.3.38.38.38.1595 | ✓ | ✓ | ✓ |
| SAL_BA8150AA | 32467 | SRR1969951 | 2014 | 7 | 19 | Europe | United Kingdom | Enteritidis | 31456 | 1.2.3.38.38.38.703  | ✓ | ✓ | ✓ |
| SAL_BA7885AA | 38410 | SRR1970082 | 2014 | 8 | 1  | Europe | United Kingdom | Enteritidis | 31578 | 1.2.3.38.38.38.483  | ✓ | ✓ | ✓ |
| SAL_BA7786AA | 38349 | SRR1970133 | 2014 | 7 | 27 | Europe | United Kingdom | Enteritidis | 31658 | 1.2.3.38.38.38.1378 | ✓ | ✓ | ✓ |
| SAL_BA7695AA | 34182 | SRR1970179 | 2014 | 7 | 24 | Europe | United Kingdom | Enteritidis | 31704 | 1.2.3.38.38.38.367  | ✓ | ✓ | ✓ |

|              |       |            |      |   |    |        |                |             |       |                     |   |   |   |
|--------------|-------|------------|------|---|----|--------|----------------|-------------|-------|---------------------|---|---|---|
| SAL_BA7689AA | 37830 | SRR1970182 | 2014 | 7 | 30 | Europe | United Kingdom | Enteritidis | 31707 | 1.2.3.38.38.38.367  | ✓ | ✓ | ✓ |
| SAL_BA7611AA | 31927 | SRR1970220 | 2014 | 7 | 22 | Europe | United Kingdom | Enteritidis | 2066  | 1.2.3.38.38.38.367  | ✓ | ✓ | ✓ |
| SAL_BA7600AA | 46584 | SRR1970226 | 2014 | 7 | 17 | Europe | United Kingdom | Enteritidis | 31754 | 1.2.3.38.38.38.393  | ✓ | ✓ | ✓ |
| SAL_BA7479AA | 29391 | SRR1970288 | 2014 | 7 | 14 | Europe | United Kingdom | Enteritidis | 31812 | 1.2.3.38.38.38.393  | ✓ | ✓ | ✓ |
| SAL_BA7469AA | 37824 | SRR1970294 | 2014 | 7 | 27 | Europe | United Kingdom | Enteritidis | 2066  | 1.2.3.38.38.38.367  | ✓ | ✓ | ✓ |
| SAL_BA7461AA | 38345 | SRR1970302 | 2014 | 7 | 28 | Europe | United Kingdom | Enteritidis | 7153  | 1.2.3.38.38.38.393  | ✓ | ✓ | ✓ |
| SAL_BA7442AA | 46581 | SRR1970321 | 2014 | 7 | 18 | Europe | United Kingdom | Enteritidis | 31840 | 1.2.3.38.38.38.367  | ✓ | ✓ | ✓ |
| SAL_EA8049AA | 18557 | SRR3048580 | 2014 | 6 | 6  | Europe | United Kingdom | Enteritidis | 6818  | 1.2.3.38.38.38.38   | ✓ | ✓ | ✓ |
| SAL_EA8008AA | 56935 | SRR3048716 | 2014 | 8 | 1  | Europe | United Kingdom | Enteritidis | 2066  | 1.2.3.38.38.38.413  | ✓ | ✓ | ✓ |
| SAL_EA7962AA | 21810 | SRR3048785 | 2014 | 6 | 6  | Europe | United Kingdom | Enteritidis | 6902  | 1.2.3.38.38.38.38   | ✓ | ✓ | ✓ |
| SAL_EA7824AA | 29970 | SRR3048933 | 2014 | 7 | 21 | Europe | United Kingdom | Enteritidis | 7033  | 1.2.3.38.38.38.367  | ✓ | ✓ | ✓ |
| SAL_EA7699AA | 29280 | SRR3049070 | 2014 | 7 | 11 | Europe | United Kingdom | Enteritidis | 7153  | 1.2.3.38.38.38.393  | ✓ | ✓ | ✓ |
| SAL_EA7675AA | 21117 | SRR3049094 | 2014 | 6 | 4  | Europe | United Kingdom | Enteritidis | 7177  | 1.2.3.38.38.38.38   | ✓ | ✓ | ✓ |
| SAL_EA7665AA | 20909 | SRR3049104 | 2014 | 4 | 6  | Europe | United Kingdom | Enteritidis | 674   | 1.2.3.38.38.38.38   | ✓ | ✓ | ✓ |
| SAL_EA7540AA | 21868 | SRR3049229 | 2014 | 6 | 11 | Europe | United Kingdom | Enteritidis | 7309  | 1.2.3.38.38.38.2660 | ✓ | ✓ | ✓ |
| SAL_EA7504AA | 18555 | SRR3049265 | 2014 | 6 | 6  | Europe | United Kingdom | Enteritidis | 7344  | 1.2.3.38.38.38.38   | ✓ | ✓ | ✓ |
| SAL_EA7467AA | 21116 | SRR3049304 | 2014 | 6 | 4  | Europe | United Kingdom | Enteritidis | 7381  | 1.2.3.38.38.38.1775 | ✓ | ✓ | ✓ |
| SAL_EA7408AA | 18554 | SRR3049366 | 2014 | 6 | 6  | Europe | United Kingdom | Enteritidis | 7435  | 1.2.3.38.38.38.38   | ✓ | ✓ | ✓ |
| SAL_EA7367AA | 29281 | SRR3049409 | 2014 | 7 | 11 | Europe | United Kingdom | Enteritidis | 7473  | 1.2.3.38.38.38.393  | ✓ | ✓ | ✓ |
| SAL_EA7334AA | 20925 | SRR3049443 | 2014 | 6 | 6  | Europe | United Kingdom | Enteritidis | 674   | 1.2.3.38.38.38.38   | ✓ | ✓ | ✓ |
| SAL_EA7277AA | 20926 | SRR3049503 | 2014 | 6 | 7  | Europe | United Kingdom | Enteritidis | 7555  | 1.2.3.38.38.38.2103 | ✓ | ✓ | ✓ |
| SAL_EA7237AA | 20927 | SRR3049543 | 2014 | 6 | 8  | Europe | United Kingdom | Enteritidis | 7593  | 1.2.3.38.38.38.38   | ✓ | ✓ | ✓ |
| SAL_EA7167AA | 34190 | SRR3049621 | 2014 | 7 | 24 | Europe | United Kingdom | Enteritidis | 7660  | 1.2.3.38.38.38.367  | ✓ | ✓ | ✓ |
| SAL_EA7135AA | 21843 | SRR3049661 | 2014 | 6 | 1  | Europe | United Kingdom | Enteritidis | 674   | 1.2.3.38.38.38.38   | ✓ | ✓ | ✓ |
| SAL_EA7086AA | 29972 | SRR3049720 | 2014 | 7 | 21 | Europe | United Kingdom | Enteritidis | 7736  | 1.2.3.38.38.38.367  | ✓ | ✓ | ✓ |
| SAL_EA7083AA | 21844 | SRR3049723 | 2014 | 6 | 10 | Europe | United Kingdom | Enteritidis | 7739  | 1.2.3.38.38.38.38   | ✓ | ✓ | ✓ |
| SAL_EA6989AA | 21114 | SRR3049844 | 2014 | 6 | 4  | Europe | United Kingdom | Enteritidis | 7827  | 1.2.3.38.38.38.38   | ✓ | ✓ | ✓ |
| SAL_EA6943AA | 21113 | SRR3049901 | 2014 | 6 | 4  | Europe | United Kingdom | Enteritidis | 7870  | 1.2.3.38.38.38.1449 | ✓ | ✓ | ✓ |
| SAL_EA6911AA | 21815 | SRR3049937 | 2014 | 6 | 9  | Europe | United Kingdom | Enteritidis | 7901  | 1.2.3.38.38.38.38   | ✓ | ✓ | ✓ |
| SAL_EA6910AA | 21115 | SRR3049939 | 2014 | 6 | 4  | Europe | United Kingdom | Enteritidis | 7902  | 1.2.3.38.38.38.38   | ✓ | ✓ | ✓ |
| SAL_EA9314AA | 38368 | SRR3120716 | 2014 | 7 | 31 | Europe | United Kingdom | Enteritidis | 5791  | 1.2.3.38.38.38.367  | ✓ | ✓ | ✓ |
| SAL_CA2175AA | 21767 | SRR1967796 | 2014 | 6 | 4  | Europe | United Kingdom | Enteritidis | 28504 | 1.2.3.38.38.38.38   | ✓ |   | ✓ |
| SAL_CA4703AA | 31926 | SRR1965207 | 2014 | 7 |    | Europe | United Kingdom | Enteritidis | 26303 |                     |   |   | ✓ |
| SAL_CA2567AA | 36499 | SRR1967404 | 2014 | 7 |    | Europe | United Kingdom | Enteritidis | 28167 |                     |   |   | ✓ |
| SAL_CA2505AA | 38312 | SRR1967466 | 2014 | 8 |    | Europe | United Kingdom | Enteritidis | 28218 |                     |   |   | ✓ |
| SAL_CA0560AA | 31924 | SRR1968701 | 2014 | 7 |    | Europe | United Kingdom | Enteritidis | 29540 |                     |   |   | ✓ |
| SAL_CA0240AA | 31930 | SRR1968863 | 2014 | 7 |    | Europe | United Kingdom | Enteritidis | 29815 |                     |   |   | ✓ |
| SAL_BA7675AA | 57104 | SRR1970189 | 2014 | 8 |    | Europe | United Kingdom | Enteritidis | 31713 |                     |   |   | ✓ |
| SAL_EA7611AA | 21813 | SRR3049158 |      |   |    | Europe | United Kingdom | Enteritidis | 7238  |                     |   |   | ✓ |
| SAL_EA9317AA | 36461 | SRR3120711 |      |   |    | Europe | United Kingdom | Enteritidis | 5789  |                     |   |   | ✓ |
| SAL_CA6794AA | 44683 | SRR1957774 | 2014 | 8 | 29 | Europe | United Kingdom | Enteritidis | 24493 | 1.2.3.38.38.38.1469 | ✓ | ✓ |   |
| SAL_CA6754AA | 45262 | SRR1957814 | 2014 | 9 | 1  | Europe | United Kingdom | Enteritidis | 24533 | 1.2.3.38.38.38.461  | ✓ | ✓ |   |
| SAL_CA6748AA | 49751 | SRR1957820 | 2014 | 9 | 15 | Europe | United Kingdom | Enteritidis | 24538 | 1.2.3.38.38.38.2163 | ✓ | ✓ |   |
| SAL_CA6726AA | 62582 | SRR1957842 | 2014 | 9 | 2  | Europe | United Kingdom | Enteritidis | 24558 | 1.2.3.38.38.38.1404 | ✓ | ✓ |   |
| SAL_CA6716AA | 62574 | SRR1957852 | 2014 | 9 | 1  | Europe | United Kingdom | Enteritidis | 24568 | 1.2.3.38.38.38.461  | ✓ | ✓ |   |
| SAL_CA6691AA | 62581 | SRR1957877 | 2014 | 8 | 27 | Europe | United Kingdom | Enteritidis | 24591 | 1.2.3.38.38.38.550  | ✓ | ✓ |   |

|              |       |            |      |    |    |        |                |             |       |                     |   |   |
|--------------|-------|------------|------|----|----|--------|----------------|-------------|-------|---------------------|---|---|
| SAL_CA6680AA | 48262 | SRR1957888 | 2014 | 9  | 5  | Europe | United Kingdom | Enteritidis | 24601 | 1.2.3.38.38.38.367  | ✓ | ✓ |
| SAL_CA6582AA | 46118 | SRR1957986 | 2014 | 8  | 20 | Europe | United Kingdom | Enteritidis | 24693 | 1.2.3.38.38.38.550  | ✓ | ✓ |
| SAL_CA6557AA | 58510 | SRR1958011 | 2014 | 10 | 2  | Europe | United Kingdom | Enteritidis | 7317  | 1.2.3.38.38.38.655  | ✓ | ✓ |
| SAL_CA6541AA | 46085 | SRR1958028 | 2014 | 8  | 19 | Europe | United Kingdom | Enteritidis | 24732 | 1.2.3.38.38.38.550  | ✓ | ✓ |
| SAL_CA6536AA | 50109 | SRR1958033 | 2014 | 9  | 16 | Europe | United Kingdom | Enteritidis | 24738 | 1.2.3.38.38.38.787  | ✓ | ✓ |
| SAL_CA6517AA | 57623 | SRR1958052 | 2014 | 8  | 8  | Europe | United Kingdom | Enteritidis | 2066  | 1.2.3.38.38.38.367  | ✓ | ✓ |
| SAL_CA6439AA | 48206 | SRR1958131 | 2014 | 9  | 4  | Europe | United Kingdom | Enteritidis | 24824 | 1.2.3.38.38.38.550  | ✓ | ✓ |
| SAL_CA6369AA | 50158 | SRR1958208 | 2014 | 9  | 20 | Europe | United Kingdom | Enteritidis | 2066  | 1.2.3.38.38.38.413  | ✓ | ✓ |
| SAL_CA6358AA | 57641 | SRR1958219 | 2014 | 9  | 26 | Europe | United Kingdom | Enteritidis | 7317  | 1.2.3.38.38.38.655  | ✓ | ✓ |
| SAL_CA6305AA | 62610 | SRR1958272 | 2014 | 10 | 30 | Europe | United Kingdom | Enteritidis | 24946 | 1.2.3.38.38.38.653  | ✓ | ✓ |
| SAL_CA6297AA | 66845 | SRR1958280 | 2014 | 10 | 13 | Europe | United Kingdom | Enteritidis | 7317  | 1.2.3.38.38.38.544  | ✓ | ✓ |
| SAL_CA6117AA | 62554 | SRR1958460 | 2014 | 8  | 24 | Europe | United Kingdom | Enteritidis | 25112 | 1.2.3.38.38.38.550  | ✓ | ✓ |
| SAL_CA6073AA | 60382 | SRR1958504 | 2014 | 10 | 7  | Europe | United Kingdom | Enteritidis | 7317  | 1.2.3.38.38.38.2034 | ✓ | ✓ |
| SAL_CA6031AA | 46156 | SRR1958546 | 2014 | 8  | 19 | Europe | United Kingdom | Enteritidis | 25187 | 1.2.3.38.38.38.550  | ✓ | ✓ |
| SAL_CA5963AA | 62556 | SRR1958614 | 2014 | 8  | 29 | Europe | United Kingdom | Enteritidis | 25250 | 1.2.3.38.38.38.1151 | ✓ | ✓ |
| SAL_CA5901AA | 60074 | SRR1958676 | 2014 | 10 | 9  | Europe | United Kingdom | Enteritidis | 7317  | 1.2.3.38.38.38.655  | ✓ | ✓ |
| SAL_CA5598AA | 69743 | SRR1960032 | 2014 | 11 | 13 | Europe | United Kingdom | Enteritidis | 25562 | 1.2.3.38.38.38.484  | ✓ | ✓ |
| SAL_CA5222AA | 74309 | SRR1963071 | 2014 | 11 | 27 | Europe | United Kingdom | Enteritidis | 7317  | 1.2.3.38.38.38.458  | ✓ | ✓ |
| SAL_CA5115AA | 69699 | SRR1963272 | 2014 | 11 | 12 | Europe | United Kingdom | Enteritidis | 24946 | 1.2.3.38.38.38.653  | ✓ | ✓ |
| SAL_CA4837AA | 34180 | SRR1965068 | 2014 | 7  | 17 | Europe | United Kingdom | Enteritidis | 26182 | 1.2.3.38.38.38.624  | ✓ | ✓ |
| SAL_CA4792AA | 57102 | SRR1965114 | 2014 | 8  | 11 | Europe | United Kingdom | Enteritidis | 26222 | 1.2.3.38.38.38.367  | ✓ | ✓ |
| SAL_CA4785AA | 32476 | SRR1965122 | 2014 | 7  | 17 | Europe | United Kingdom | Enteritidis | 26229 | 1.2.3.38.38.38.393  | ✓ | ✓ |
| SAL_CA4697AA | 50356 | SRR1965213 | 2014 | 9  | 5  | Europe | United Kingdom | Enteritidis | 26308 | 1.2.3.38.38.38.624  | ✓ | ✓ |
| SAL_CA4642AA | 53110 | SRR1965275 | 2014 | 9  | 23 | Europe | United Kingdom | Enteritidis | 26355 | 1.2.3.38.38.38.354  | ✓ | ✓ |
| SAL_CA4605AA | 21785 | SRR1965313 | 2014 | 6  | 3  | Europe | United Kingdom | Enteritidis | 26390 | 1.2.3.38.38.38.38   | ✓ | ✓ |
| SAL_CA4591AA | 52954 | SRR1965327 | 2014 | 9  | 25 | Europe | United Kingdom | Enteritidis | 26402 | 1.2.3.38.38.38.655  | ✓ | ✓ |
| SAL_CA4580AA | 37759 | SRR1965339 | 2014 | 7  | 28 | Europe | United Kingdom | Enteritidis | 514   | 1.2.3.38.38.38.570  | ✓ | ✓ |
| SAL_CA4509AA | 65448 | SRR1965411 | 2014 | 10 | 3  | Europe | United Kingdom | Enteritidis | 26469 | 1.2.3.38.38.38.2246 | ✓ | ✓ |
| SAL_CA4476AA | 40327 | SRR1965444 | 2014 | 8  | 18 | Europe | United Kingdom | Enteritidis | 26498 | 1.2.3.38.38.38.550  | ✓ | ✓ |
| SAL_CA4438AA | 24053 | SRR1965483 | 2014 | 6  | 19 | Europe | United Kingdom | Enteritidis | 26531 | 1.2.3.38.38.38.1166 | ✓ | ✓ |
| SAL_CA4437AA | 43431 | SRR1965484 | 2014 | 8  | 29 | Europe | United Kingdom | Enteritidis | 26532 | 1.2.3.38.38.38.458  | ✓ | ✓ |
| SAL_CA4427AA | 38309 | SRR1965496 | 2014 | 7  | 28 | Europe | United Kingdom | Enteritidis | 26542 | 1.2.3.38.38.38.413  | ✓ | ✓ |
| SAL_CA4394AA | 37778 | SRR1965530 | 2014 | 8  | 1  | Europe | United Kingdom | Enteritidis | 7612  | 1.2.3.38.38.38.367  | ✓ | ✓ |
| SAL_CA4361AA | 31977 | SRR1965563 | 2014 | 4  | 22 | Europe | United Kingdom | Enteritidis | 514   | 1.2.3.38.38.38.790  | ✓ | ✓ |
| SAL_CA4317AA | 36473 | SRR1965618 | 2014 | 7  | 21 | Europe | United Kingdom | Enteritidis | 26634 | 1.2.3.38.38.38.746  | ✓ | ✓ |
| SAL_CA4268AA | 36506 | SRR1965669 | 2014 | 7  | 24 | Europe | United Kingdom | Enteritidis | 26678 | 1.2.3.38.38.38.461  | ✓ | ✓ |
| SAL_CA4213AA | 37062 | SRR1965730 | 2014 | 8  | 6  | Europe | United Kingdom | Enteritidis | 26723 | 1.2.3.38.38.38.1201 | ✓ | ✓ |
| SAL_CA4209AA | 65449 | SRR1965735 | 2014 | 8  | 1  | Europe | United Kingdom | Enteritidis | 26727 | 1.2.3.38.38.38.413  | ✓ | ✓ |
| SAL_CA4203AA | 40269 | SRR1965742 | 2014 | 8  | 9  | Europe | United Kingdom | Enteritidis | 26733 | 1.2.3.38.38.38.1162 | ✓ | ✓ |
| SAL_CA4194AA | 46009 | SRR1965753 | 2014 | 8  | 9  | Europe | United Kingdom | Enteritidis | 25112 | 1.2.3.38.38.38.550  | ✓ | ✓ |
| SAL_CA4174AA | 65379 | SRR1965774 | 2014 | 9  | 29 | Europe | United Kingdom | Enteritidis | 26759 | 1.2.3.38.38.38.728  | ✓ | ✓ |
| SAL_CA4165AA | 57112 | SRR1965784 | 2014 | 8  | 1  | Europe | United Kingdom | Enteritidis | 26768 | 1.2.3.38.38.38.413  | ✓ | ✓ |
| SAL_CA4088AA | 31952 | SRR1965867 | 2014 | 7  | 24 | Europe | United Kingdom | Enteritidis | 512   | 1.2.3.38.38.38.550  | ✓ | ✓ |
| SAL_CA4077AA | 91893 | SRR1965879 | 2014 | 8  | 1  | Europe | United Kingdom | Enteritidis | 26844 | 1.2.3.38.38.38.413  | ✓ | ✓ |
| SAL_CA4061AA | 31969 | SRR1965895 | 2014 | 7  | 25 | Europe | United Kingdom | Enteritidis | 26858 | 1.2.3.38.38.38.624  | ✓ | ✓ |
| SAL_CA3956AA | 23500 | SRR1966002 | 2014 | 6  | 17 | Europe | United Kingdom | Enteritidis | 26951 | 1.2.3.38.38.38.949  | ✓ | ✓ |

|              |       |            |      |    |    |        |                |             |       |                         |   |   |
|--------------|-------|------------|------|----|----|--------|----------------|-------------|-------|-------------------------|---|---|
| SAL_CA3943AA | 39486 | SRR1966020 | 2014 | 8  | 4  | Europe | United Kingdom | Enteritidis | 26963 | 1.2.3.38.38.38.1184     | ✓ | ✓ |
| SAL_CA3934AA | 26644 | SRR1966029 | 2014 | 6  | 30 | Europe | United Kingdom | Enteritidis | 26971 | 1.2.3.38.38.38.472      | ✓ | ✓ |
| SAL_CA3888AA | 37835 | SRR1966076 | 2014 | 7  | 28 | Europe | United Kingdom | Enteritidis | 27010 | 1.2.3.38.38.38.1127     | ✓ | ✓ |
| SAL_CA3887AA | 36504 | SRR1966077 | 2014 | 7  | 23 | Europe | United Kingdom | Enteritidis | 27011 | 1.2.3.38.38.38.544      | ✓ | ✓ |
| SAL_CA3862AA | 25260 | SRR1966102 | 2014 | 7  | 7  | Europe | United Kingdom | Enteritidis | 27034 | 1.2.3.38.38.38.550      | ✓ | ✓ |
| SAL_CA3715AA | 34187 | SRR1966252 | 2014 | 7  | 25 | Europe | United Kingdom | Enteritidis | 27163 | 1.2.3.38.38.38.367      | ✓ | ✓ |
| SAL_CA3678AA | 32477 | SRR1966289 | 2014 | 7  | 17 | Europe | United Kingdom | Enteritidis | 27198 | 1.2.3.38.38.38.393      | ✓ | ✓ |
| SAL_CA3660AA | 40794 | SRR1966307 | 2014 | 8  | 12 | Europe | United Kingdom | Enteritidis | 27214 | 1.2.3.38.38.38.478      | ✓ | ✓ |
| SAL_CA3622AA | 57113 | SRR1966345 | 2014 | 8  | 5  | Europe | United Kingdom | Enteritidis | 27248 | 1.2.3.38.38.38.413      | ✓ | ✓ |
| SAL_CA3616AA | 5355  | SRR1966351 | 2014 | 4  | 2  | Europe | United Kingdom | Enteritidis | 7317  | 1.3.154.272.272.272.272 | ✓ | ✓ |
| SAL_CA3519AA | 39449 | SRR1966447 | 2014 | 7  | 21 | Europe | United Kingdom | Enteritidis | 27345 | 1.2.3.38.38.38.367      | ✓ | ✓ |
| SAL_CA3484AA | 21781 | SRR1966482 | 2014 | 6  | 2  | Europe | United Kingdom | Enteritidis | 27375 | 1.2.3.38.38.38.729      | ✓ | ✓ |
| SAL_CA3475AA | 37822 | SRR1966491 | 2014 | 7  | 30 | Europe | United Kingdom | Enteritidis | 27384 | 1.2.3.38.38.38.393      | ✓ | ✓ |
| SAL_CA3464AA | 36392 | SRR1966502 | 2014 | 8  | 4  | Europe | United Kingdom | Enteritidis | 27394 | 1.2.3.38.38.38.488      | ✓ | ✓ |
| SAL_CA3431AA | 68972 | SRR1966536 | 2014 | 11 | 11 | Europe | United Kingdom | Enteritidis | 7317  | 1.2.3.38.38.38.2646     | ✓ | ✓ |
| SAL_CA3345AA | 56112 | SRR1966625 | 2014 | 9  | 12 | Europe | United Kingdom | Enteritidis | 27492 | 1.2.3.38.38.38.354      | ✓ | ✓ |
| SAL_CA3342AA | 73134 | SRR1966628 | 2014 | 12 | 1  | Europe | United Kingdom | Enteritidis | 27495 | 1.2.3.38.38.38.2129     | ✓ | ✓ |
| SAL_CA3286AA | 32470 | SRR1966685 | 2014 | 7  | 17 | Europe | United Kingdom | Enteritidis | 27546 | 1.2.3.38.38.38.367      | ✓ | ✓ |
| SAL_CA3256AA | 38772 | SRR1966715 | 2014 | 8  | 6  | Europe | United Kingdom | Enteritidis | 27571 | 1.2.3.38.38.38.413      | ✓ | ✓ |
| SAL_CA3226AA | 37111 | SRR1966745 | 2014 | 8  | 6  | Europe | United Kingdom | Enteritidis | 27599 | 1.2.3.38.38.38.1431     | ✓ | ✓ |
| SAL_CA3113AA | 21786 | SRR1966858 | 2014 | 6  | 3  | Europe | United Kingdom | Enteritidis | 674   | 1.2.3.38.38.38.38       | ✓ | ✓ |
| SAL_CA3060AA | 73221 | SRR1966911 | 2014 | 12 | 8  | Europe | United Kingdom | Enteritidis | 27738 | 1.2.3.38.38.38.970      | ✓ | ✓ |
| SAL_CA3043AA | 34171 | SRR1966928 | 2014 | 7  | 24 | Europe | United Kingdom | Enteritidis | 27755 | 1.2.3.38.38.38.2245     | ✓ | ✓ |
| SAL_CA3036AA | 14128 | SRR1966935 | 2014 | 5  | 22 | Europe | United Kingdom | Enteritidis | 27761 | 1.2.3.38.38.38.949      | ✓ | ✓ |
| SAL_CA2987AA | 27067 | SRR1966984 | 2014 | 7  | 7  | Europe | United Kingdom | Enteritidis | 674   | 1.2.3.38.38.38.38       | ✓ | ✓ |
| SAL_CA2933AA | 37814 | SRR1967038 | 2014 | 7  | 30 | Europe | United Kingdom | Enteritidis | 27851 | 1.2.3.38.38.38.367      | ✓ | ✓ |
| SAL_CA2925AA | 46582 | SRR1967046 | 2014 | 7  | 16 | Europe | United Kingdom | Enteritidis | 27858 | 1.2.3.38.38.38.393      | ✓ | ✓ |
| SAL_CA2918AA | 34198 | SRR1967053 | 2014 | 7  | 24 | Europe | United Kingdom | Enteritidis | 27863 | 1.2.3.38.38.38.1153     | ✓ | ✓ |
| SAL_CA2895AA | 52972 | SRR1967076 | 2014 | 9  | 26 | Europe | United Kingdom | Enteritidis | 2066  | 1.2.3.38.38.38.413      | ✓ | ✓ |
| SAL_CA2850AA | 65390 | SRR1967121 | 2014 | 9  | 12 | Europe | United Kingdom | Enteritidis | 24946 | 1.2.3.38.38.38.653      | ✓ | ✓ |
| SAL_CA2840AA | 31611 | SRR1967131 | 2014 | 7  | 14 | Europe | United Kingdom | Enteritidis | 27925 | 1.2.3.38.38.38.394      | ✓ | ✓ |
| SAL_CA2802AA | 61859 | SRR1967169 | 2014 | 10 | 10 | Europe | United Kingdom | Enteritidis | 27958 | 1.2.3.38.38.38.571      | ✓ | ✓ |
| SAL_CA2784AA | 34202 | SRR1967187 | 2014 | 7  | 21 | Europe | United Kingdom | Enteritidis | 27975 | 1.2.3.38.38.38.393      | ✓ | ✓ |
| SAL_CA2755AA | 32525 | SRR1967216 | 2014 | 7  | 18 | Europe | United Kingdom | Enteritidis | 28000 | 1.2.3.38.38.38.367      | ✓ | ✓ |
| SAL_CA2710AA | 38411 | SRR1967261 | 2014 | 7  | 30 | Europe | United Kingdom | Enteritidis | 28037 | 1.2.3.38.38.38.544      | ✓ | ✓ |
| SAL_CA2687AA | 39515 | SRR1967284 | 2014 | 8  | 11 | Europe | United Kingdom | Enteritidis | 28056 | 1.2.3.38.38.38.550      | ✓ | ✓ |
| SAL_CA2650AA | 40324 | SRR1967321 | 2014 | 8  | 18 | Europe | United Kingdom | Enteritidis | 28090 | 1.2.3.38.38.38.550      | ✓ | ✓ |
| SAL_CA2577AA | 57103 | SRR1967394 | 2014 | 7  | 31 | Europe | United Kingdom | Enteritidis | 28157 | 1.2.3.38.38.38.413      | ✓ | ✓ |
| SAL_CA2549AA | 14099 | SRR1967422 | 2014 | 5  | 21 | Europe | United Kingdom | Enteritidis | 28182 | 1.2.3.38.38.38.949      | ✓ | ✓ |
| SAL_CA2493AA | 36476 | SRR1967478 | 2014 | 7  | 21 | Europe | United Kingdom | Enteritidis | 7612  | 1.2.3.38.38.38.746      | ✓ | ✓ |
| SAL_CA2461AA | 38718 | SRR1967510 | 2014 | 8  | 7  | Europe | United Kingdom | Enteritidis | 28254 | 1.2.3.38.38.38.1288     | ✓ | ✓ |
| SAL_CA2438AA | 32375 | SRR1967533 | 2014 | 7  | 18 | Europe | United Kingdom | Enteritidis | 7153  | 1.2.3.38.38.38.393      | ✓ | ✓ |
| SAL_CA2431AA | 24987 | SRR1967540 | 2014 | 6  | 28 | Europe | United Kingdom | Enteritidis | 28283 | 1.2.3.38.38.38.472      | ✓ | ✓ |
| SAL_CA2374AA | 57130 | SRR1967597 | 2014 | 9  | 30 | Europe | United Kingdom | Enteritidis | 28332 | 1.2.3.38.38.38.653      | ✓ | ✓ |
| SAL_CA2346AA | 36385 | SRR1967625 | 2014 | 8  | 4  | Europe | United Kingdom | Enteritidis | 7317  | 1.2.3.38.38.38.544      | ✓ | ✓ |
| SAL_CA2242AA | 32464 | SRR1967729 | 2014 | 7  | 17 | Europe | United Kingdom | Enteritidis | 28445 | 1.2.3.38.38.38.544      | ✓ | ✓ |

|              |       |            |      |    |    |        |                |             |       |                           |   |   |
|--------------|-------|------------|------|----|----|--------|----------------|-------------|-------|---------------------------|---|---|
| SAL_CA2170AA | 50360 | SRR1967801 | 2014 | 9  | 3  | Europe | United Kingdom | Enteritidis | 28509 | 1.2.3.38.38.38.653        | ✓ | ✓ |
| SAL_CA1887AA | 39447 | SRR1967990 | 2014 | 7  | 18 | Europe | United Kingdom | Enteritidis | 28676 | 1.2.3.38.38.38.570        | ✓ | ✓ |
| SAL_CA1882AA | 36394 | SRR1967993 | 2014 | 8  | 4  | Europe | United Kingdom | Enteritidis | 2066  | 1.2.3.38.38.38.367        | ✓ | ✓ |
| SAL_CA1871AA | 37006 | SRR1967999 | 2014 | 8  | 3  | Europe | United Kingdom | Enteritidis | 28684 | 1.2.3.38.38.38.653        | ✓ | ✓ |
| SAL_CA1747AA | 42171 | SRR1968063 | 2014 | 8  | 26 | Europe | United Kingdom | Enteritidis | 28739 | 1.2.3.38.38.38.1544       | ✓ | ✓ |
| SAL_CA1735AA | 65373 | SRR1968069 | 2014 | 10 | 2  | Europe | United Kingdom | Enteritidis | 28744 | 1.2.3.38.38.38.790        | ✓ | ✓ |
| SAL_CA1318AA | 25320 | SRR1968299 | 2014 | 6  | 24 | Europe | United Kingdom | Enteritidis | 29050 | 1.2.3.38.38.38.472        | ✓ | ✓ |
| SAL_CA1311AA | 9310  | SRR1968303 | 2014 | 4  | 23 | Europe | United Kingdom | Enteritidis | 29054 | 1.3.6.6.6.6.6             | ✓ | ✓ |
| SAL_CA1299AA | 40273 | SRR1968309 | 2014 | 8  | 12 | Europe | United Kingdom | Enteritidis | 29060 | 1.2.3.38.38.38.1151       | ✓ | ✓ |
| SAL_CA1278AA | 57111 | SRR1968319 | 2014 | 8  | 1  | Europe | United Kingdom | Enteritidis | 29070 | 1.2.3.38.38.38.1365       | ✓ | ✓ |
| SAL_CA1258AA | 31965 | SRR1968329 | 2014 | 7  | 25 | Europe | United Kingdom | Enteritidis | 2066  | 1.2.3.38.38.38.367        | ✓ | ✓ |
| SAL_CA1168AA | 13389 | SRR1968417 | 2014 | 5  | 12 | Europe | United Kingdom | Enteritidis | 29158 | 1.2.3.38.38.38.962        | ✓ | ✓ |
| SAL_CA1162AA | 34203 | SRR1968423 | 2014 | 7  | 21 | Europe | United Kingdom | Enteritidis | 29164 | 1.2.3.38.38.38.393        | ✓ | ✓ |
| SAL_CA1093AA | 31975 | SRR1968475 | 2014 | 7  | 25 | Europe | United Kingdom | Enteritidis | 29212 | 1.2.3.38.38.38.1903       | ✓ | ✓ |
| SAL_CA0903AA | 40224 | SRR1968520 | 2014 | 8  | 13 | Europe | United Kingdom | Enteritidis | 29255 | 1.2.3.38.38.38.413        | ✓ | ✓ |
| SAL_CA0844AA | 36364 | SRR1968553 | 2014 | 7  | 30 | Europe | United Kingdom | Enteritidis | 514   | 1.2.3.38.38.38.910        | ✓ | ✓ |
| SAL_CA0741AA | 65434 | SRR1968603 | 2014 | 9  | 30 | Europe | United Kingdom | Enteritidis | 7317  | 1.2.3.38.38.38.655        | ✓ | ✓ |
| SAL_CA0720AA | 40274 | SRR1968614 | 2014 | 8  | 11 | Europe | United Kingdom | Enteritidis | 29406 | 1.2.3.38.38.38.766        | ✓ | ✓ |
| SAL_CA0650AA | 25266 | SRR1968651 | 2014 | 7  | 1  | Europe | United Kingdom | Enteritidis | 512   | 1.2.3.38.38.38.550        | ✓ | ✓ |
| SAL_CA0634AA | 36475 | SRR1968659 | 2014 | 7  | 21 | Europe | United Kingdom | Enteritidis | 29482 | 1.2.3.38.38.38.746        | ✓ | ✓ |
| SAL_CA0607AA | 31656 | SRR1968675 | 2014 | 7  | 10 | Europe | United Kingdom | Enteritidis | 29502 | 1.2.3.38.38.38.533        | ✓ | ✓ |
| SAL_CA0461AA | 46011 | SRR1968755 | 2014 | 8  | 9  | Europe | United Kingdom | Enteritidis | 2066  | 1.2.3.38.38.38.367        | ✓ | ✓ |
| SAL_CA0414AA | 36477 | SRR1968778 | 2014 | 7  | 21 | Europe | United Kingdom | Enteritidis | 2066  | 1.2.3.38.38.38.367        | ✓ | ✓ |
| SAL_CA0401AA | 37037 | SRR1968785 | 2014 | 8  |    | Europe | France         | Enteritidis | 29673 | 1.2.3.38.38.38.1098       | ✓ | ✓ |
| SAL_CA0389AA | 23057 | SRR1968791 | 2014 | 6  | 7  | Europe | United Kingdom | Enteritidis | 29684 | 1.2.3.38.38.38.413        | ✓ | ✓ |
| SAL_CA0358AA | 21782 | SRR1968806 | 2014 | 6  | 2  | Europe | United Kingdom | Enteritidis | 29714 | 1.2.3.38.38.38.38         | ✓ | ✓ |
| SAL_CA0356AA | 13835 | SRR1968807 | 2014 | 5  | 15 | Europe | United Kingdom | Enteritidis | 29715 | 1.1.2.1074.1763.2074.3174 | ✓ | ✓ |
| SAL_CA0161AA | 37800 | SRR1968900 | 2014 | 7  | 29 | Europe | United Kingdom | Enteritidis | 29862 | 1.2.3.38.38.38.367        | ✓ | ✓ |
| SAL_CA0138AA | 40795 | SRR1968912 | 2014 | 8  | 15 | Europe | United Kingdom | Enteritidis | 25250 | 1.2.3.38.38.38.766        | ✓ | ✓ |
| SAL_CA0102AA | 37036 | SRR1968931 | 2014 | 8  |    | Europe | France         | Enteritidis | 551   | 1.2.3.38.38.38.600        | ✓ | ✓ |
| SAL_CA0022AA | 31623 | SRR1968972 | 2014 | 7  | 9  | Europe | United Kingdom | Enteritidis | 29978 | 1.2.3.38.38.38.38         | ✓ | ✓ |
| SAL_BA9958AA | 27797 | SRR1969004 | 2014 | 6  | 27 | Europe | United Kingdom | Enteritidis | 30026 | 1.2.3.38.38.38.38         | ✓ | ✓ |
| SAL_BA9836AA | 57110 | SRR1969068 | 2014 | 8  | 1  | Europe | United Kingdom | Enteritidis | 30124 | 1.2.3.38.38.38.413        | ✓ | ✓ |
| SAL_BA9661AA | 32478 | SRR1969172 | 2014 | 7  | 17 | Europe | United Kingdom | Enteritidis | 30253 | 1.2.3.38.38.38.393        | ✓ | ✓ |
| SAL_BA9625AA | 39514 | SRR1969190 | 2014 | 8  | 14 | Europe | United Kingdom | Enteritidis | 30280 | 1.2.3.38.38.38.413        | ✓ | ✓ |
| SAL_BA9621AA | 65125 | SRR1969192 | 2014 | 11 | 4  | Europe | United Kingdom | Enteritidis | 30284 | 1.2.3.38.38.38.653        | ✓ | ✓ |
| SAL_BA9589AA | 43427 | SRR1969209 | 2014 | 8  | 28 | Europe | United Kingdom | Enteritidis | 30311 | 1.2.3.38.38.38.461        | ✓ | ✓ |
| SAL_BA9550AA | 32550 | SRR1969229 | 2014 | 7  | 18 | Europe | United Kingdom | Enteritidis | 30344 | 1.2.3.38.38.38.393        | ✓ | ✓ |
| SAL_BA9457AA | 41995 | SRR1969283 | 2014 | 8  | 20 | Europe | United Kingdom | Enteritidis | 30417 | 1.2.3.38.38.38.413        | ✓ | ✓ |
| SAL_BA9372AA | 46593 | SRR1969365 | 2014 | 7  | 15 | Europe | United Kingdom | Enteritidis | 30489 | 1.2.3.38.38.38.1608       | ✓ | ✓ |
| SAL_BA9351AA | 37038 | SRR1969386 | 2014 | 8  |    | Europe | France         | Enteritidis | 30506 | 1.2.3.38.38.38.2314       | ✓ | ✓ |
| SAL_BA9138AA | 39506 | SRR1969515 | 2014 | 8  | 8  | Europe | United Kingdom | Enteritidis | 30689 | 1.2.3.38.38.38.367        | ✓ | ✓ |
| SAL_BA9133AA | 23082 | SRR1969517 | 2014 | 6  | 8  | Europe | United Kingdom | Enteritidis | 30694 | 1.2.3.38.38.38.1315       | ✓ | ✓ |
| SAL_BA8887AA | 38428 | SRR1969578 | 2014 | 7  | 29 | Europe | United Kingdom | Enteritidis | 30879 | 1.2.3.38.38.38.550        | ✓ | ✓ |
| SAL_BA8669AA | 36528 | SRR1969692 | 2014 | 7  | 28 | Europe | United Kingdom | Enteritidis | 31057 | 1.2.3.38.38.38.436        | ✓ | ✓ |
| SAL_BA8636AA | 32475 | SRR1969708 | 2014 | 7  | 17 | Europe | United Kingdom | Enteritidis | 31088 | 1.2.3.38.38.38.2060       | ✓ | ✓ |

|              |       |            |      |   |           |                |             |       |                          |   |   |
|--------------|-------|------------|------|---|-----------|----------------|-------------|-------|--------------------------|---|---|
| SAL_BA8627AA | 37035 | SRR1969713 | 2014 | 8 | Europe    | France         | Enteritidis | 31096 | 1.2.3.38.38.38.673       | ✓ | ✓ |
| SAL_BA8576AA | 31612 | SRR1969738 | 2014 | 7 | 14 Europe | United Kingdom | Enteritidis | 31141 | 1.2.3.38.38.38.394       | ✓ | ✓ |
| SAL_BA8545AA | 31613 | SRR1969753 | 2014 | 7 | 14 Europe | United Kingdom | Enteritidis | 31165 | 1.2.3.38.38.38.38        | ✓ | ✓ |
| SAL_BA8376AA | 36474 | SRR1969839 | 2014 | 7 | 21 Europe | United Kingdom | Enteritidis | 2066  | 1.2.3.38.38.38.367       | ✓ | ✓ |
| SAL_BA8364AA | 37007 | SRR1969845 | 2014 | 8 | 1 Europe  | United Kingdom | Enteritidis | 31298 | 1.2.3.38.38.38.393       | ✓ | ✓ |
| SAL_BA8273AA | 38430 | SRR1969891 | 2014 | 8 | 1 Europe  | Jersey         | Enteritidis | 31366 | 1.2.3.38.38.38.367       | ✓ | ✓ |
| SAL_BA8265AA | 25225 | SRR1969895 | 2014 | 7 | 28 Europe | United Kingdom | Enteritidis | 31374 | 1.2.3.38.38.38.472       | ✓ | ✓ |
| SAL_BA8197AA | 41991 | SRR1969928 | 2014 | 8 | 19 Europe | United Kingdom | Enteritidis | 31431 | 1.2.3.38.38.38.550       | ✓ | ✓ |
| SAL_BA8189AA | 23507 | SRR1969932 | 2014 | 6 | 19 Europe | United Kingdom | Enteritidis | 31439 | 1.2.3.38.38.38.962       | ✓ | ✓ |
| SAL_BA8017AA | 38773 | SRR1970014 | 2014 | 8 | 7 Europe  | United Kingdom | Enteritidis | 31511 | 1.2.3.38.38.38.413       | ✓ | ✓ |
| SAL_BA7794AA | 37806 | SRR1970129 | 2014 | 7 | 30 Europe | United Kingdom | Enteritidis | 31654 | 1.2.3.38.38.38.1162      | ✓ | ✓ |
| SAL_BA7770AA | 39446 | SRR1970141 | 2014 | 7 | 12 Europe | United Kingdom | Enteritidis | 31668 | 1.2.3.38.38.38.393       | ✓ | ✓ |
| SAL_BA7725AA | 31981 | SRR1970163 | 2014 | 7 | 25 Europe | United Kingdom | Enteritidis | 2066  | 1.2.3.38.38.38.367       | ✓ | ✓ |
| SAL_EA8050AA | 21845 | SRR3048579 | 2014 | 6 | 10 Europe | United Kingdom | Enteritidis | 6817  | 1.2.3.38.38.38.38        | ✓ | ✓ |
| SAL_EA7904AA | 43909 | SRR3048844 | 2014 | 8 | 21 Europe | United Kingdom | Enteritidis | 6957  | 1.2.3.38.38.38.413       | ✓ | ✓ |
| SAL_EA7808AA | 46125 | SRR3048951 | 2014 | 8 | 23 Europe | United Kingdom | Enteritidis | 7049  | 1.2.3.38.38.38.550       | ✓ | ✓ |
| SAL_EA7763AA | 21132 | SRR3048999 | 2014 | 5 | 31 Europe | United Kingdom | Enteritidis | 7091  | 1.2.3.38.38.38.2669      | ✓ | ✓ |
| SAL_EA7752AA | 58576 | SRR3049014 | 2014 | 9 | 28 Europe | United Kingdom | Enteritidis | 7102  | 1.2.3.38.38.38.1418      | ✓ | ✓ |
| SAL_EA7702AA | 53036 | SRR3049067 | 2014 | 9 | 23 Europe | United Kingdom | Enteritidis | 674   | 1.2.3.38.38.38.38        | ✓ | ✓ |
| SAL_EA7701AA | 56991 | SRR3049068 | 2014 | 9 | 30 Europe | United Kingdom | Enteritidis | 7151  | 1.2.3.38.38.38.2244      | ✓ | ✓ |
| SAL_EA7677AA | 21119 | SRR3049092 | 2014 | 6 | 4 Europe  | United Kingdom | Enteritidis | 7175  | 1.2.3.38.38.38.2483      | ✓ | ✓ |
| SAL_EA7644AA | 43884 | SRR3049125 | 2014 | 8 | 13 Europe | United Kingdom | Enteritidis | 7205  | 1.2.3.38.38.38.2366      | ✓ | ✓ |
| SAL_EA7635AA | 43930 | SRR3049134 | 2014 | 8 | 14 Europe | United Kingdom | Enteritidis | 7214  | 1.2.3.38.38.38.1795      | ✓ | ✓ |
| SAL_EA7599AA | 48161 | SRR3049170 | 2014 | 8 | 24 Europe | United Kingdom | Enteritidis | 7250  | 1.2.3.38.38.38.550       | ✓ | ✓ |
| SAL_EA7582AA | 43936 | SRR3049187 | 2014 | 8 | 21 Europe | United Kingdom | Enteritidis | 7267  | 1.2.3.38.38.38.1151      | ✓ | ✓ |
| SAL_EA7578AA | 21846 | SRR3049191 | 2014 | 6 | 9 Europe  | United Kingdom | Enteritidis | 7271  | 1.2.3.38.38.38.38        | ✓ | ✓ |
| SAL_EA7449AA | 46155 | SRR3049322 | 2014 | 8 | 27 Europe | United Kingdom | Enteritidis | 7399  | 1.2.3.38.38.38.461       | ✓ | ✓ |
| SAL_EA7409AA | 45269 | SRR3049365 | 2014 | 8 | 27 Europe | United Kingdom | Enteritidis | 7434  | 1.2.3.38.38.38.550       | ✓ | ✓ |
| SAL_EA7284AA | 43925 | SRR3049494 | 2014 | 8 | 13 Europe | United Kingdom | Enteritidis | 7549  | 1.2.3.38.38.38.1351      | ✓ | ✓ |
| SAL_EA7278AA | 20929 | SRR3049502 | 2014 | 6 | 3 Europe  | United Kingdom | Enteritidis | 7554  | 1.2.3.38.38.38.550       | ✓ | ✓ |
| SAL_EA7267AA | 43958 | SRR3049513 | 2014 | 8 | 18 Europe | United Kingdom | Enteritidis | 7565  | 1.2.3.38.38.38.550       | ✓ | ✓ |
| SAL_EA7231AA | 39517 | SRR3049549 | 2014 | 8 | 12 Europe | United Kingdom | Enteritidis | 7599  | 1.2.3.38.38.38.550       | ✓ | ✓ |
| SAL_EA7216AA | 29971 | SRR3049565 | 2014 | 7 | 21 Europe | United Kingdom | Enteritidis | 7612  | 1.2.3.38.38.38.367       | ✓ | ✓ |
| SAL_EA7084AA | 43960 | SRR3049722 | 2014 | 8 | 18 Europe | United Kingdom | Enteritidis | 7738  | 1.2.3.38.38.38.550       | ✓ | ✓ |
| SAL_EA7071AA | 18556 | SRR3049743 | 2014 | 6 | 6 Europe  | United Kingdom | Enteritidis | 7750  | 1.2.3.38.38.38.38        | ✓ | ✓ |
| SAL_EA7047AA | 29308 | SRR3049775 | 2014 | 7 | 15 Europe | United Kingdom | Enteritidis | 7773  | 1.2.3.38.38.38.413       | ✓ | ✓ |
| SAL_EA7041AA | 25004 | SRR3049783 | 2014 | 7 | 3 Europe  | United Kingdom | Enteritidis | 7779  | 1.2.3.38.38.38.550       | ✓ | ✓ |
| SAL_EA7034AA | 1514  | SRR3049796 | 2014 | 3 | 25 Europe | United Kingdom | Enteritidis | 7786  | 1.27.153.271.271.271.271 | ✓ | ✓ |
| SAL_EA7020AA | 43937 | SRR3049811 | 2014 | 8 | 21 Europe | United Kingdom | Enteritidis | 7799  | 1.2.3.38.38.38.550       | ✓ | ✓ |
| SAL_EA6983AA | 21120 | SRR3049851 | 2014 | 6 | 2 Europe  | United Kingdom | Enteritidis | 7833  | 1.2.3.38.38.38.949       | ✓ | ✓ |
| SAL_EA6940AA | 21871 | SRR3049904 | 2014 | 6 | 12 Europe | United Kingdom | Enteritidis | 7873  | 1.2.3.38.38.38.807       | ✓ | ✓ |
| SAL_EA9321AA | 43927 | SRR3120707 | 2014 | 8 | 17 Europe | United Kingdom | Enteritidis | 5788  | 1.2.3.38.38.38.515       | ✓ | ✓ |
| SAL_FA4108AA | 21807 | SRR3323014 | 2014 | 6 | 8 Europe  | United Kingdom | Enteritidis | 674   | 1.2.3.38.38.38.38        | ✓ | ✓ |
| SAL_FA5451AA | 21809 | SRR3401403 | 2014 | 6 | 8 Europe  | United Kingdom | Enteritidis | 674   | 1.2.3.38.38.38.38        | ✓ | ✓ |
| SAL_FA5597AA | 05224 | SRR3410208 | 2014 |   | Europe    | Germany        | Enteritidis | 545   | 1.2.3.38.38.38.686       | ✓ | ✓ |
| SAL_FA5596AA | 05225 | SRR3410209 | 2014 |   | Europe    | Germany        | Enteritidis | 546   | 1.2.3.38.38.38.687       | ✓ | ✓ |



|              |            |                 |      |    |        |            |                |             |                     |                           |   |  |
|--------------|------------|-----------------|------|----|--------|------------|----------------|-------------|---------------------|---------------------------|---|--|
| SAL_FA5595AA | 05226      | SRR3410210      | 2014 |    | Europe | Germany    | Enteritidis    | 547         | 1.2.3.38.38.38.2115 | ✓                         | ✓ |  |
| SAL_FA5594AA | 05227      | SRR3410211      | 2014 |    | Europe | Germany    | Enteritidis    | 548         | 1.2.3.38.38.38.685  | ✓                         | ✓ |  |
| SAL_FA5593AA | 05795      | SRR3410212      | 2014 |    | Europe | Germany    | Enteritidis    | 549         | 1.2.3.38.38.38.2801 | ✓                         | ✓ |  |
| SAL_FA5592AA | 05946      | SRR3410213      | 2014 |    | Europe | Germany    | Enteritidis    | 550         | 1.2.3.38.38.38.2799 | ✓                         | ✓ |  |
| SAL_FA5591AA | 06012      | SRR3410214      | 2014 |    | Europe | Germany    | Enteritidis    | 551         | 1.2.3.38.38.38.2798 | ✓                         | ✓ |  |
| SAL_FA5590AA | 06175      | SRR3410215      | 2014 |    | Europe | Germany    | Enteritidis    | 551         | 1.2.3.38.38.38.2800 | ✓                         | ✓ |  |
| SAL_FA5589AA | 06388      | SRR3410216      | 2014 |    | Europe | Germany    | Enteritidis    | 552         | 1.2.3.38.38.38.2797 | ✓                         | ✓ |  |
| SAL_FA5634AA | 37045      | SRR3417493      | 2014 |    | Europe | Austria    | Enteritidis    | 511         | 1.2.3.38.38.38.1757 | ✓                         | ✓ |  |
| SAL_FA5633AA | 37046      | SRR3417494      | 2014 |    | Europe | Austria    | Enteritidis    | 512         | 1.2.3.38.38.38.357  | ✓                         | ✓ |  |
| SAL_FA5632AA | 37047      | SRR3417495      | 2014 |    | Europe | Austria    | Enteritidis    | 513         | 1.2.3.38.38.38.413  | ✓                         | ✓ |  |
| SAL_FA5631AA | 45605      | SRR3417496      | 2014 |    | Europe | Luxembourg | Enteritidis    | 514         | 1.2.3.38.38.38.790  | ✓                         | ✓ |  |
| SAL_FA5630AA | 49691      | SRR3417497      | 2014 |    | Europe | Austria    | Enteritidis    | 515         | 1.2.3.38.38.38.1111 | ✓                         | ✓ |  |
| SAL_FA5629AA | 49692      | SRR3417498      | 2014 |    | Europe | Austria    | Enteritidis    | 516         | 1.2.3.38.38.38.357  | ✓                         | ✓ |  |
| SAL_FA5628AA | 49693      | SRR3417499      | 2014 |    | Europe | Austria    | Enteritidis    | 517         | 1.2.3.38.38.38.357  | ✓                         | ✓ |  |
| SAL_FA5627AA | 50104      | SRR3417500      | 2014 |    | Europe | Austria    | Enteritidis    | 518         | 1.2.3.38.38.38.790  | ✓                         | ✓ |  |
| SAL_FA5626AA | 53973      | SRR3417501      | 2014 |    | Europe | Germany    | Enteritidis    | 519         | 1.2.3.38.38.38.1394 | ✓                         | ✓ |  |
| SAL_FA5625AA | 53996      | SRR3417502      | 2014 |    | Europe | Germany    | Enteritidis    | 520         | 1.2.3.38.38.38.1255 | ✓                         | ✓ |  |
| SAL_FA5624AA | 54008      | SRR3417503      | 2014 |    | Europe | Germany    | Enteritidis    | 521         | 1.2.3.38.38.38.533  | ✓                         | ✓ |  |
| SAL_FA5623AA | 54014      | SRR3417504      | 2014 |    | Europe | Germany    | Enteritidis    | 522         | 1.2.3.38.38.38.1555 | ✓                         | ✓ |  |
| SAL_FA5622AA | 54038      | SRR3417505      | 2014 |    | Europe | Germany    | Enteritidis    | 523         | 1.2.3.38.38.38.1555 | ✓                         | ✓ |  |
| SAL_FA5621AA | 54047      | SRR3417506      | 2014 |    | Europe | Germany    | Enteritidis    | 524         | 1.2.3.38.38.38.1438 | ✓                         | ✓ |  |
| SAL_FA5620AA | 54053      | SRR3417507      | 2014 |    | Europe | Germany    | Enteritidis    | 525         | 1.2.3.38.38.38.1255 | ✓                         | ✓ |  |
| SAL_FA5619AA | 54059      | SRR3417508      | 2014 |    | Europe | Germany    | Enteritidis    | 526         | 1.2.3.38.38.38.2623 | ✓                         | ✓ |  |
| SAL_EA8419AA | 201405757  | traces-0folqty  | 2014 | 7  | 2      | Europe     | France         | Enteritidis | 555                 | ✓                         | ✓ |  |
| SAL_EA8417AA | 201405861  | traces-0hvfvoaj | 2014 | 7  | 18     | Europe     | France         | Enteritidis | 556                 | ✓                         | ✓ |  |
| SAL_EA8112AA | 201405760  | traces-0JiMSsi  | 2014 | 7  | 23     | Europe     | France         | Enteritidis | 512                 | ✓                         | ✓ |  |
| SAL_EA8113AA | 201405756  | traces-0qWodHp  | 2014 | 7  | 21     | Europe     | France         | Enteritidis | 554                 | ✓                         | ✓ |  |
| SAL_EA8416AA | 201405122  | traces-0wRGnlX  | 2014 | 7  | 19     | Europe     | France         | Enteritidis | 553                 | ✓                         | ✓ |  |
| SAL_DA1790AA | H124680351 | SRR1635097      | 2012 | 11 | 7      | Europe     | United Kingdom | Enteritidis | 20195               | 1.1.185.343.343.343.343   | ✓ |  |
| SAL_DA1773AA | H123940649 | SRR1635114      | 2012 | 9  | 21     | Europe     | United Kingdom | Enteritidis | 20211               | 1.6.11.13.333.333.333     | ✓ |  |
| SAL_DA1151AA | H121440322 | SRR1645334      | 2012 | 3  | 26     | Europe     | United Kingdom | Enteritidis | 20755               | 13.29.164.288.288.288.288 | ✓ |  |
| SAL_DA1070AA | H123740519 | SRR1645445      | 2012 | 9  | 3      | Europe     | United Kingdom | Enteritidis | 20833               | 1.1.176.315.315.315.812   | ✓ |  |
| SAL_DA0883AA | H123580521 | SRR1645782      | 2012 | 8  | 22     | Europe     | United Kingdom | Enteritidis | 21002               | 1.1.177.321.321.321.321   | ✓ |  |
| SAL_DA0881AA | H123480474 | SRR1645784      | 2012 | 8  | 21     | Europe     | United Kingdom | Enteritidis | 21004               | 3.4.49.318.318.318.318    | ✓ |  |
| SAL_DA0796AA | H122540669 | SRR1645877      | 2012 | 6  | 16     | Europe     | United Kingdom | Enteritidis | 21083               | 1.5.170.299.299.299.299   | ✓ |  |
| SAL_DA0775AA | H122280366 | SRR1645898      | 2012 | 5  | 29     | Europe     | United Kingdom | Enteritidis | 21103               | 1.5.166.294.294.294.294   | ✓ |  |
| SAL_DA0563AA | H122420304 | SRR1646133      | 2012 | 6  | 7      | Europe     | United Kingdom | Enteritidis | 21303               | 1.1.168.297.297.297.297   | ✓ |  |
| SAL_DA0480AA | H120540611 | SRR1646243      | 2012 | 2  | 1      | Europe     | United Kingdom | Enteritidis | 21378               | 1.1.162.286.286.286.286   | ✓ |  |
| SAL_DA0447AA | H123980391 | SRR1646278      | 2012 | 9  | 17     | Europe     | United Kingdom | Enteritidis | 21407               | 1.11.181.335.335.335.335  | ✓ |  |
| SAL_CA6836AA | 44755      | SRR1957732      | 2014 | 9  | 10     | Europe     | United Kingdom | Enteritidis | 24457               | 10.20.81.133.133.133.133  | ✓ |  |
| SAL_CA6759AA | 44692      | SRR1957809      | 2014 | 9  | 8      | Europe     | United Kingdom | Enteritidis | 15673               | 1.5.79.129.129.129.129    | ✓ |  |
| SAL_CA6715AA | 49744      | SRR1957853      | 2014 | 9  | 23     | Europe     | United Kingdom | Enteritidis | 24569               | 1.21.92.155.155.155.155   | ✓ |  |
| SAL_CA6705AA | 46132      | SRR1957863      | 2014 | 8  | 29     | Europe     | United Kingdom | Enteritidis | 24578               | 9.16.68.108.144.144.144   | ✓ |  |
| SAL_CA6690AA | 62560      | SRR1957878      | 2014 | 9  | 5      | Europe     | United Kingdom | Enteritidis | 24592               | 3.4.8.205.205.205.205     | ✓ |  |
| SAL_CA6635AA | 62551      | SRR1957933      | 2014 | 9  | 3      | Europe     | United Kingdom | Enteritidis | 24643               | 1.5.112.204.204.204.204   | ✓ |  |
| SAL_CA6449AA | 66859      | SRR1958121      | 2014 | 10 | 24     | Europe     | United Kingdom | Enteritidis | 24816               | 1.24.129.235.235.235.235  | ✓ |  |

|              |       |            |      |    |    |        |                |             |       |                             |   |
|--------------|-------|------------|------|----|----|--------|----------------|-------------|-------|-----------------------------|---|
| SAL_CA6418AA | 48243 | SRR1958152 | 2014 | 9  | 15 | Europe | United Kingdom | Enteritidis | 24844 | 1.1.2.149.149.149.149       | ✓ |
| SAL_CA6406AA | 46128 | SRR1958164 | 2014 | 8  | 29 | Europe | United Kingdom | Enteritidis | 24854 | 1.1.88.143.143.143.143      | ✓ |
| SAL_CA6252AA | 54060 | SRR1958325 | 2014 | 9  | 25 | Europe | United Kingdom | Enteritidis | 24992 | 1.1.101.174.174.174.174     | ✓ |
| SAL_CA5999AA | 50150 | SRR1958578 | 2014 | 9  | 24 | Europe | United Kingdom | Enteritidis | 25218 | 1.1.2.43.43.380.2290        | ✓ |
| SAL_CA5913AA | 46122 | SRR1958664 | 2014 | 8  | 29 | Europe | United Kingdom | Enteritidis | 25292 | 1.1.87.142.142.142.142      | ✓ |
| SAL_CA5850AA | 80307 | SRR1959222 | 2015 | 1  | 13 | Europe | United Kingdom | Enteritidis | 25345 | 1.1.202.526.680.735.915     | ✓ |
| SAL_CA5846AA | 70657 | SRR1959226 | 2014 | 11 | 27 | Europe | United Kingdom | Enteritidis | 25347 | 1.25.140.251.251.251.251    | ✓ |
| SAL_CA5734AA | 73611 | SRR1959386 | 2014 | 12 | 9  | Europe | United Kingdom | Enteritidis | 25442 | 1.1.151.268.268.268.268     | ✓ |
| SAL_CA5678AA | 71396 | SRR1959443 | 2012 | 11 | 6  | Europe | United Kingdom | Enteritidis | 25491 | 1.26.144.258.258.258.258    | ✓ |
| SAL_CA5654AA | 68894 | SRR1959468 | 2014 | 10 | 23 | Europe | United Kingdom | Enteritidis | 25510 | 1.1.136.244.244.244.244     | ✓ |
| SAL_CA5566AA | 71409 | SRR1960073 | 2012 | 11 | 6  | Europe | United Kingdom | Enteritidis | 25587 | 1.7.146.262.262.262.262     | ✓ |
| SAL_CA5507AA | 78695 | SRR1960166 | 2014 | 12 | 24 | Europe | United Kingdom | Enteritidis | 25635 | 1.1.222.1001.1587.1831.2556 | ✓ |
| SAL_CA5446AA | 73639 | SRR1960236 | 2014 | 12 | 10 | Europe | United Kingdom | Enteritidis | 25687 | 1.21.152.270.270.270.270    | ✓ |
| SAL_CA5334AA | 69702 | SRR1960378 | 2014 | 11 | 19 | Europe | United Kingdom | Enteritidis | 25786 | 1.1.138.247.247.247.247     | ✓ |
| SAL_CA5315AA | 80363 | SRR1960665 | 2015 | 1  | 14 | Europe | United Kingdom | Enteritidis | 25798 | 1.5.205.604.822.905.1161    | ✓ |
| SAL_CA5302AA | 80341 | SRR1960928 | 2015 | 1  | 13 | Europe | United Kingdom | Enteritidis | 25808 | 1.5.201.507.639.686.839     | ✓ |
| SAL_CA5285AA | 73535 | SRR1961505 | 2014 | 9  | 19 | Europe | United Kingdom | Enteritidis | 50869 | 1.1.148.264.264.264.264     | ✓ |
| SAL_CA5166AA | 69142 | SRR1963148 | 2014 | 11 | 13 | Europe | United Kingdom | Enteritidis | 25919 | 3.4.137.245.245.245.245     | ✓ |
| SAL_CA5161AA | 70664 | SRR1963220 | 2014 | 11 | 27 | Europe | United Kingdom | Enteritidis | 25922 | 3.4.141.253.253.253.253     | ✓ |
| SAL_CA5118AA | 70666 | SRR1963269 | 2014 | 11 | 27 | Europe | United Kingdom | Enteritidis | 25955 | 1.1.105.178.254.254.254     | ✓ |
| SAL_CA4968AA | 73554 | SRR1963454 | 2014 | 9  | 22 | Europe | United Kingdom | Enteritidis | 26077 | 1.1.150.266.266.266.266     | ✓ |
| SAL_CA4588AA | 32527 | SRR1965330 | 2014 | 7  | 23 | Europe | United Kingdom | Enteritidis | 26405 | 1.1.53.76.76.76.76          | ✓ |
| SAL_CA4559AA | 45606 | SRR1965360 | 2014 | 9  | 9  | Europe | United Kingdom | Enteritidis | 26429 | 1.5.83.136.136.136.136      | ✓ |
| SAL_CA4431AA | 41987 | SRR1965492 | 2014 | 8  | 27 | Europe | United Kingdom | Enteritidis | 26538 | 1.15.61.118.118.118.118     | ✓ |
| SAL_CA4372AA | 13360 | SRR1965552 | 2014 | 4  | 15 | Europe | United Kingdom | Enteritidis | 26588 | 1.1.2.360.368.369.3150      | ✓ |
| SAL_CA4299AA | 99068 | SRR1965636 | 2015 | 3  | 27 | Europe | United Kingdom | Enteritidis | 25745 | 1.1.204.580.786.862.1101    | ✓ |
| SAL_CA4228AA | 67566 | SRR1965713 | 2014 | 11 | 11 | Europe | United Kingdom | Enteritidis | 26712 | 1.1.130.237.237.237.237     | ✓ |
| SAL_CA4214AA | 68636 | SRR1965729 | 2014 | 10 | 13 | Europe | United Kingdom | Enteritidis | 7317  | 1.2.3.38.38.38.544          | ✓ |
| SAL_CA4168AA | 53007 | SRR1965781 | 2014 | 10 | 1  | Europe | United Kingdom | Enteritidis | 26765 | 8.14.59.168.168.168.168     | ✓ |
| SAL_CA4045AA | 68692 | SRR1965912 | 2014 | 11 | 12 | Europe | United Kingdom | Enteritidis | 26868 | 1.1.134.242.242.242.242     | ✓ |
| SAL_CA4020AA | 96239 | SRR1965938 | 2015 | 3  | 16 | Europe | United Kingdom | Enteritidis | 26890 | 1.1.208.623.859.955.1226    | ✓ |
| SAL_CA4010AA | 9245  | SRR1965948 | 2014 | 4  | 23 | Europe | United Kingdom | Enteritidis | 26899 | 1.2.3.38.38.38.1098         | ✓ |
| SAL_CA3995AA | 83318 | SRR1965963 | 2015 | 1  | 21 | Europe | United Kingdom | Enteritidis | 26913 | 4.31.193.423.488.506.568    | ✓ |
| SAL_CA3908AA | 55582 | SRR1966056 | 2014 | 9  | 19 | Europe | United Kingdom | Enteritidis | 26991 | 3.4.104.177.177.177.177     | ✓ |
| SAL_CA3880AA | 14875 | SRR1966084 | 2014 | 5  | 20 | Europe | United Kingdom | Enteritidis | 27017 | 1.7.14.16.16.16.16          | ✓ |
| SAL_CA3771AA | 9286  | SRR1966195 | 2014 | 5  | 1  | Europe | United Kingdom | Enteritidis | 27109 | 1.1.1.1.1.1.1               | ✓ |
| SAL_CA3761AA | 9464  | SRR1966205 | 2014 | 4  | 29 | Europe | United Kingdom | Enteritidis | 27119 | 1.1.4.9.9.9.9               | ✓ |
| SAL_CA3373AA | 51262 | SRR1966595 | 2014 | 9  | 17 | Europe | United Kingdom | Enteritidis | 27468 | 1.1.2.167.167.167.167       | ✓ |
| SAL_CA3359AA | 83588 | SRR1966609 | 2015 | 1  | 27 | Europe | United Kingdom | Enteritidis | 27480 | 1.1.198.484.603.644.780     | ✓ |
| SAL_CA3248AA | 65019 | SRR1966723 | 2014 | 11 | 4  | Europe | United Kingdom | Enteritidis | 27579 | 1.1.124.226.226.226.226     | ✓ |
| SAL_CA3045AA | 38414 | SRR1966926 | 2014 | 8  | 6  | Europe | United Kingdom | Enteritidis | 27753 | 1.12.64.98.98.98.98         | ✓ |
| SAL_CA2965AA | 73223 | SRR1967006 | 2014 | 12 | 10 | Europe | United Kingdom | Enteritidis | 27825 | 1.1.147.263.263.263.263     | ✓ |
| SAL_CA2952AA | 63914 | SRR1967019 | 2014 | 11 | 5  | Europe | United Kingdom | Enteritidis | 27838 | 1.1.119.217.217.217.217     | ✓ |
| SAL_CA2914AA | 12185 | SRR1967057 | 2014 | 5  | 13 | Europe | United Kingdom | Enteritidis | 27866 | 1.5.9.11.11.11.11           | ✓ |
| SAL_CA2838AA | 68690 | SRR1967133 | 2014 | 11 | 12 | Europe | United Kingdom | Enteritidis | 27927 | 1.1.2.240.240.240.240       | ✓ |
| SAL_CA2661AA | 38415 | SRR1967310 | 2014 | 8  | 6  | Europe | United Kingdom | Enteritidis | 28079 | 1.1.30.99.99.99.99          | ✓ |

|              |        |            |      |    |    |        |                |             |       |                               |   |
|--------------|--------|------------|------|----|----|--------|----------------|-------------|-------|-------------------------------|---|
| SAL_CA2636AA | 14895  | SRR1967335 | 2014 | 5  | 21 | Europe | United Kingdom | Enteritidis | 28104 | 4.8.15.17.17.17.17            | ✓ |
| SAL_CA2445AA | 9182   | SRR1967526 | 2014 | 5  | 7  | Europe | United Kingdom | Enteritidis | 28270 | 1.2.3.18.278.278.278          | ✓ |
| SAL_CA2190AA | 7410   | SRR1967781 | 2014 | 4  | 29 | Europe | United Kingdom | Enteritidis | 28492 | 1.1.157.276.276.276.276       | ✓ |
| SAL_CA1919AA | 65407  | SRR1967973 | 2014 | 9  | 17 | Europe | United Kingdom | Enteritidis | 28661 | 1.1.127.233.233.233.233       | ✓ |
| SAL_CA1781AA | 95017  | SRR1968045 | 2015 | 3  | 11 | Europe | United Kingdom | Enteritidis | 28723 | 1.1.212.724.1061.1193.1591    | ✓ |
| SAL_CA1709AA | 45579  | SRR1968089 | 2014 | 9  | 9  | Europe | United Kingdom | Enteritidis | 28762 | 1.11.82.135.135.135.135       | ✓ |
| SAL_CA1644AA | 9263   | SRR1968125 | 2014 | 4  | 24 | Europe | United Kingdom | Enteritidis | 28825 | 1.5.159.280.280.280.280       | ✓ |
| SAL_CA1631AA | 34201  | SRR1968131 | 2014 | 7  | 29 | Europe | United Kingdom | Enteritidis | 28838 | 3.4.8.81.81.81.81             | ✓ |
| SAL_CA1499AA | 38412  | SRR1968202 | 2014 | 8  | 6  | Europe | United Kingdom | Enteritidis | 28959 | 1.1.63.97.97.97.97            | ✓ |
| SAL_CA1480AA | 31651  | SRR1968212 | 2014 | 7  | 15 | Europe | United Kingdom | Enteritidis | 28976 | 1.1.34.74.74.74.74            | ✓ |
| SAL_CA1304AA | 27973  | SRR1968306 | 2014 | 7  | 17 | Europe | United Kingdom | Enteritidis | 29057 | 1.1.44.59.59.59.59            | ✓ |
| SAL_CA1186AA | 40280  | SRR1968399 | 2014 | 8  | 19 | Europe | United Kingdom | Enteritidis | 29141 | 1.5.69.111.111.111.111        | ✓ |
| SAL_CA1179AA | 39508  | SRR1968406 | 2014 | 8  | 18 | Europe | United Kingdom | Enteritidis | 29147 | 1.11.48.106.106.106.106       | ✓ |
| SAL_CA0914AA | 23508  | SRR1968511 | 2014 | 6  | 25 | Europe | United Kingdom | Enteritidis | 29244 | 1.1.38.47.47.47.47            | ✓ |
| SAL_CA0512AA | 37836  | SRR1968725 | 2014 | 8  | 5  | Europe | United Kingdom | Enteritidis | 29580 | 3.13.56.93.93.93.93           | ✓ |
| SAL_CA0496AA | 40366  | SRR1968732 | 2014 | 8  | 28 | Europe | United Kingdom | Enteritidis | 29594 | 1.5.72.115.115.115.115        | ✓ |
| SAL_CA0475AA | 34191  | SRR1968743 | 2014 | 7  | 29 | Europe | United Kingdom | Enteritidis | 29609 | 1.12.55.79.79.79.79           | ✓ |
| SAL_CA0411AA | 68689  | SRR1968780 | 2014 | 11 | 12 | Europe | United Kingdom | Enteritidis | 29663 | 1.1.131.239.239.239.239       | ✓ |
| SAL_BA9681AA | 83706  | SRR1969162 | 2014 | 12 | 4  | Europe | United Kingdom | Enteritidis | 25680 | 1.5.192.373.396.403.786       | ✓ |
| SAL_BA9491AA | 68696  | SRR1969258 | 2014 | 11 | 13 | Europe | United Kingdom | Enteritidis | 25666 | 1.1.135.243.243.243.243       | ✓ |
| SAL_BA9456AA | 63932  | SRR1969284 | 2014 | 11 | 6  | Europe | United Kingdom | Enteritidis | 30418 | 1.1.122.221.221.221.221       | ✓ |
| SAL_BA9448AA | 12110  | SRR1969291 | 2014 | 5  | 8  | Europe | United Kingdom | Enteritidis | 30426 | 1.2.3.38.38.38.949            | ✓ |
| SAL_BA9347AA | 13413  | SRR1969390 | 2014 | 5  | 16 | Europe | United Kingdom | Enteritidis | 30510 | 1.2.3.151.151.151.3167        | ✓ |
| SAL_BA9112AA | 45610  | SRR1969527 | 2014 | 9  | 9  | Europe | United Kingdom | Enteritidis | 30712 | 1.1.2.137.137.137.137         | ✓ |
| SAL_BA8867AA | 85758  | SRR1969589 | 2015 | 2  | 9  | Europe | United Kingdom | Enteritidis | 27533 | 1.1.200.491.619.660.802       | ✓ |
| SAL_BA8861AA | 6446   | SRR1969592 | 2014 | 4  | 17 | Europe | United Kingdom | Enteritidis | 30900 | 1.1.156.275.275.275.275       | ✓ |
| SAL_BA8778AA | 53129  | SRR1969657 | 2014 | 9  | 29 | Europe | United Kingdom | Enteritidis | 31001 | 1.1.2.173.173.173.173         | ✓ |
| SAL_BA8599AA | 39476  | SRR1969727 | 2014 | 8  | 15 | Europe | United Kingdom | Enteritidis | 31119 | 1.11.67.104.104.104.104       | ✓ |
| SAL_BA8493AA | 94103  | SRR1969779 | 2015 | 3  | 5  | Europe | United Kingdom | Enteritidis | 31207 | 1.5.209.638.889.994.1289      | ✓ |
| SAL_BA8372AA | 53113  | SRR1969841 | 2014 | 9  | 29 | Europe | United Kingdom | Enteritidis | 31296 | 1.1.99.172.172.172.172        | ✓ |
| SAL_BA7987AA | 40348  | SRR1970029 | 2014 | 8  | 28 | Europe | United Kingdom | Enteritidis | 31527 | 3.17.71.114.114.114.114       | ✓ |
| SAL_BA7790AA | 32392  | SRR1970131 | 2014 | 7  | 25 | Europe | United Kingdom | Enteritidis | 31656 | 1.1.52.75.75.75.75            | ✓ |
| SAL_BA7768AA | 63923  | SRR1970142 | 2014 | 11 | 6  | Europe | United Kingdom | Enteritidis | 31669 | 8.23.121.220.220.220.220      | ✓ |
| SAL_BA7739AA | 95025  | SRR1970156 | 2015 | 3  | 11 | Europe | United Kingdom | Enteritidis | 31680 | 17.38.223.1020.1637.1891.2642 | ✓ |
| SAL_EA7787AA | 21091  | SRR3048975 | 2014 | 6  | 3  | Europe | United Kingdom | Enteritidis | 7069  | 1.11.31.37.37.37.37           | ✓ |
| SAL_EA7715AA | 99074  | SRR3049054 | 2014 | 3  | 27 | Europe | United Kingdom | Enteritidis | 7139  | 15.32.196.474.586.621.745     | ✓ |
| SAL_EA7708AA | 20903  | SRR3049061 | 2014 | 6  | 5  | Europe | United Kingdom | Enteritidis | 7146  | 1.1.26.31.31.31.31            | ✓ |
| SAL_EA7529AA | 18577  | SRR3049240 | 2014 | 6  | 6  | Europe | United Kingdom | Enteritidis | 7319  | 4.9.21.24.24.24.24            | ✓ |
| SAL_EA7524AA | 29960  | SRR3049245 | 2014 | 7  | 23 | Europe | United Kingdom | Enteritidis | 7324  | 1.1.191.358.363.364.366       | ✓ |
| SAL_EA7420AA | 53076  | SRR3049354 | 2014 | 9  | 30 | Europe | United Kingdom | Enteritidis | 7424  | 1.1.98.171.171.171.171        | ✓ |
| SAL_EA7407AA | 18531  | SRR3049367 | 2014 | 6  | 4  | Europe | United Kingdom | Enteritidis | 7436  | 1.1.229.1034.1684.1954.2823   | ✓ |
| SAL_EA7045AA | 21065  | SRR3049778 | 2014 | 6  | 3  | Europe | United Kingdom | Enteritidis | 7775  | 1.10.28.33.33.33.33           | ✓ |
| SAL_FA3983AA | 185901 | SRR3284689 | 2015 | 11 | 3  | Europe | United Kingdom | Enteritidis | 1957  | 1.1.242.1065.1746.2051.3585   | ✓ |
| SAL_FA3963AA | 166245 | SRR3284721 | 2015 | 9  | 23 | Europe | United Kingdom | Enteritidis | 1976  | 1.2.270.1145.1898.2264.3626   | ✓ |
| SAL_FA3948AA | 134013 | SRR3284736 | 2015 | 7  | 15 | Europe | United Kingdom | Enteritidis | 1989  | 1.1.245.1070.1756.2063.3141   | ✓ |
| SAL_FA3913AA | 197074 | SRR3284773 | 2015 | 12 | 4  | Europe | United Kingdom | Enteritidis | 2021  | 1.1.47.214.1658.2500.4224     | ✓ |

|              |        |            |      |    |    |        |                |             |       |                               |   |
|--------------|--------|------------|------|----|----|--------|----------------|-------------|-------|-------------------------------|---|
| SAL_FA3844AA | 183662 | SRR3285109 | 2015 | 10 | 27 | Europe | United Kingdom | Enteritidis | 2080  | 1.1.228.1033.1681.1946.4002   | ✓ |
| SAL_FA3840AA | 206728 | SRR3285244 | 2016 | 1  | 12 | Europe | United Kingdom | Enteritidis | 2084  | 1.1.2.197.544.2403.4325       | ✓ |
| SAL_FA3831AA | 133214 | SRR3285283 | 2015 | 7  | 14 | Europe | United Kingdom | Enteritidis | 2092  | 1.1.2.1066.1749.2054.3119     | ✓ |
| SAL_FA3755AA | 146116 | SRR3285416 | 2015 | 8  | 12 | Europe | United Kingdom | Enteritidis | 2156  | 1.3.249.1082.1788.2113.3276   | ✓ |
| SAL_FA3710AA | 180813 | SRR3285462 | 2015 | 9  | 10 | Europe | United Kingdom | Enteritidis | 2196  | 1.2.262.1137.1888.2254.3602   | ✓ |
| SAL_FA3702AA | 170334 | SRR3285470 | 2015 | 9  | 17 | Europe | United Kingdom | Enteritidis | 2203  | 1.27.225.1150.1907.2277.3665  | ✓ |
| SAL_FA3634AA | 104253 | SRR3286602 | 2015 | 4  | 20 | Europe | United Kingdom | Enteritidis | 2262  | 1.3.224.1021.1652.1906.2677   | ✓ |
| SAL_FA3509AA | 122682 | SRR3286836 | 2015 | 6  | 12 | Europe | United Kingdom | Enteritidis | 2367  | 1.1.236.1049.1714.1998.2934   | ✓ |
| SAL_FA3491AA | 122699 | SRR3286863 | 2015 | 6  | 15 | Europe | United Kingdom | Enteritidis | 2381  | 1.1.237.1051.1716.2001.2940   | ✓ |
| SAL_FA3487AA | 120575 | SRR3286870 | 2015 | 4  | 30 | Europe | United Kingdom | Enteritidis | 2385  | 1.1.234.1045.1708.1982.2900   | ✓ |
| SAL_FA3479AA | 119502 | SRR3286886 | 2015 | 6  | 2  | Europe | United Kingdom | Enteritidis | 2392  | 1.1.233.1044.1704.1976.2889   | ✓ |
| SAL_FA7330AA | 143553 | SRR3585347 | 2015 | 8  | 10 | Europe | United Kingdom | Enteritidis | 40253 | 1.1.250.1085.1794.2122.3293   | ✓ |
| SAL_FA7329AA | 152413 | SRR3585348 | 2015 | 8  | 25 | Europe | United Kingdom | Enteritidis | 40254 | 1.1.256.1101.1827.2165.3375   | ✓ |
| SAL_FA7327AA | 164715 | SRR3585351 | 2015 | 9  | 21 | Europe | United Kingdom | Enteritidis | 40256 | 1.3.263.1128.1873.2229.3531   | ✓ |
| SAL_FA7326AA | 134034 | SRR3585352 | 2015 | 7  | 8  | Europe | United Kingdom | Enteritidis | 40257 | 1.1.242.1065.1746.2051.3115   | ✓ |
| SAL_FA7325AA | 137147 | SRR3585354 | 2015 | 7  | 23 | Europe | United Kingdom | Enteritidis | 40258 | 4.44.246.1071.1757.2064.3146  | ✓ |
| SAL_FA7324AA | 179844 | SRR3585355 | 2015 | 10 | 23 | Europe | United Kingdom | Enteritidis | 40259 | 1.1.277.1177.1995.2391.3912   | ✓ |
| SAL_FA7323AA | 154869 | SRR3585356 | 2015 | 9  | 1  | Europe | United Kingdom | Enteritidis | 40260 | 1.47.260.1114.1845.2190.3444  | ✓ |
| SAL_FA7322AA | 120578 | SRR3585357 | 2015 | 6  | 2  | Europe | United Kingdom | Enteritidis | 40261 | 1.3.235.1046.1710.1985.2905   | ✓ |
| SAL_FA7321AA | 153189 | SRR3585358 | 2015 | 8  | 27 | Europe | United Kingdom | Enteritidis | 40262 | 4.45.257.1106.1833.2173.3394  | ✓ |
| SAL_FA7320AA | 160846 | SRR3585359 | 2015 | 9  | 14 | Europe | United Kingdom | Enteritidis | 40263 | 4.31.264.1129.1875.2231.3537  | ✓ |
| SAL_FA7319AA | 160806 | SRR3585360 | 2015 | 9  | 10 | Europe | United Kingdom | Enteritidis | 40264 | 1.2.262.1118.1850.2199.3462   | ✓ |
| SAL_FA7318AA | 131456 | SRR3585361 | 2015 | 7  | 8  | Europe | United Kingdom | Enteritidis | 40265 | 3.4.241.1063.1740.2042.3081   | ✓ |
| SAL_FA7317AA | 178732 | SRR3585363 | 2015 | 10 | 13 | Europe | United Kingdom | Enteritidis | 40266 | 1.5.276.1175.1987.2378.3879   | ✓ |
| SAL_FA7316AA | 183605 | SRR3585364 | 2015 | 11 | 2  | Europe | United Kingdom | Enteritidis | 40267 | 1.5.279.1188.2016.2426.4013   | ✓ |
| SAL_FA7315AA | 190569 | SRR3585365 | 2015 | 11 | 24 | Europe | United Kingdom | Enteritidis | 40268 | 20.53.283.1206.2050.2481.4147 | ✓ |
| SAL_FA7314AA | 185894 | SRR3585367 | 2015 | 11 | 11 | Europe | United Kingdom | Enteritidis | 40269 | 1.1.280.1189.2017.2431.4023   | ✓ |
| SAL_FA7313AA | 168519 | SRR3585375 | 2015 | 9  | 25 | Europe | United Kingdom | Enteritidis | 40270 | 4.50.271.1154.1912.2284.3677  | ✓ |
| SAL_FA7312AA | 110976 | SRR3585376 | 2015 | 5  | 11 | Europe | United Kingdom | Enteritidis | 2345  | 1.1.228.1033.1681.1946.2785   | ✓ |
| SAL_FA7311AA | 193289 | SRR3585377 | 2015 | 12 | 2  | Europe | United Kingdom | Enteritidis | 40271 | 13.52.281.1202.2042.2470.4123 | ✓ |
