# Supplementary material for: Comparative analysis of core genome MLST and SNP typing within a European Salmonella serovar Enteritidis outbreak
Source: PubMed Central journal article supplement (PMC5899760; doi:10.1016/j.ijfoodmicro.2018.02.023), 2018-06-02
Supplement: mmc3.pdf [file mmc3.pdf]

| Enterobase Barcode | Name         | Accession No. | Collection Year | Collection Month | Collection Day | Continent     | Country       | Serovar (given)         | SISTR serovar (predicted) | rMLST | cgMLST |
|--------------------|--------------|---------------|-----------------|------------------|----------------|---------------|---------------|-------------------------|---------------------------|-------|--------|
| SAL_AA7056AA       | PNUSAS000496 | SRR2183035    | 2015            |                  | 4              | North America | United States | Enteritidis             | Enteritidis               | 1425  | 39551  |
| SAL_AA7057AA       | PNUSAS000495 | SRR2183034    | 2015            |                  | 4              | North America | United States | Enteritidis             | Enteritidis               | 1425  | 17527  |
| SAL_AA7058AA       | PNUSAS000494 | SRR2183033    | 2015            |                  | 3              | North America | United States | Enteritidis             | Enteritidis               | 1425  | 12260  |
| SAL_AA7083AA       | PNUSAS000493 | SRR2182938    |                 |                  |                | North America | United States | Enteritidis (Predicted) | Enteritidis               | 27863 | 39529  |
| SAL_AA7084AA       | PNUSAS000492 | SRR2182937    | 2015            |                  | 5              | North America | United States | Enteritidis             | Enteritidis               | 27863 | 39528  |
| SAL_AA7085AA       | PNUSAS000491 | SRR2182936    | 2015            |                  | 5              | North America | United States | Enteritidis             | Enteritidis               | 1425  | 39527  |
| SAL_AA7089AA       | PNUSAS000363 | SRR2182932    |                 |                  |                | North America | United States | Enteritidis             | Enteritidis               | 1425  | 39523  |
| SAL_AA7092AA       | PNUSAS000362 | SRR2182929    |                 |                  |                | North America | United States | Enteritidis (Predicted) | Enteritidis               | 1425  | 39520  |
| SAL_AA7093AA       | PNUSAS000361 | SRR2182925    |                 |                  |                | North America | United States | Enteritidis             | Enteritidis               | 1425  | 39519  |
| SAL_AA7106AA       | PNUSAS000511 | SRR2182912    |                 |                  |                | North America | United States | Enteritidis (Predicted) | Enteritidis               | 1425  | 39508  |
| SAL_AA7128AA       | PNUSAS000488 | SRR2182889    | 2015            |                  | 5              | North America | United States | Enteritidis             | Enteritidis               | 1425  | 39488  |
| SAL_AA7129AA       | PNUSAS000486 | SRR2182888    |                 |                  |                | North America | United States | Enteritidis (Predicted) | Enteritidis               | 1425  | 39487  |
| SAL_AA7130AA       | PNUSAS000485 | SRR2182887    |                 |                  |                | North America | United States | Enteritidis (Predicted) | Enteritidis               | 1425  | 39486  |
| SAL_AA7131AA       | PNUSAS000448 | SRR2182886    |                 |                  |                | North America | United States | Enteritidis             | Enteritidis               | 1425  | 2668   |
| SAL_AA7133AA       | PNUSAS000484 | SRR2182884    | 2015            |                  | 4              | North America | United States | Enteritidis             | Enteritidis               | 1425  | 1808   |
| SAL_AA7161AA       | PNUSAS000416 | SRR2182784    |                 |                  |                | North America | United States | Enteritidis (Predicted) | Enteritidis               | 1425  | 39467  |
| SAL_AA7162AA       | PNUSAS000415 | SRR2182783    |                 |                  |                | North America | United States | Enteritidis (Predicted) | Enteritidis               | 1425  | 35024  |
| SAL_AA7163AA       | PNUSAS000414 | SRR2182782    |                 |                  |                | North America | United States | Enteritidis (Predicted) | Enteritidis               | 8003  | 39466  |
| SAL_AA7164AA       | PNUSAS000421 | SRR2182781    |                 |                  |                | North America | United States | Enteritidis (Predicted) | Enteritidis               | 1425  | 39465  |
| SAL_AA7165AA       | PNUSAS000420 | SRR2069383    |                 |                  |                | North America | United States | Enteritidis (Predicted) | Enteritidis               | 1425  | 39464  |
| SAL_AA7166AA       | PNUSAS000419 | SRR2182779    |                 |                  |                | North America | United States | Enteritidis (Predicted) | Enteritidis               | 1425  | 39463  |
| SAL_AA7167AA       | PNUSAS000418 | SRR2182778    |                 |                  |                | North America | United States | Enteritidis (Predicted) | Enteritidis               | 1425  | 39462  |
| SAL_AA7168AA       | PNUSAS000417 | SRR2069380    |                 |                  |                | North America | United States | Enteritidis (Predicted) | Enteritidis               | 1425  | 39461  |
| SAL_AA7169AA       | PNUSAS000410 | SRR2182776    |                 |                  |                | North America | United States | Enteritidis (Predicted) | Enteritidis               | 1425  | 39460  |
| SAL_AA7170AA       | NY57462994   | SRR2157023    | 2015            |                  | 7              | North America | United States | Enteritidis             | Enteritidis               | 1425  | 39459  |
| SAL_AA7171AA       | NY57462933   | SRR2157022    | 2015            |                  | 7              | North America | United States | Enteritidis             | Enteritidis               | 1425  | 39457  |
| SAL_AA7172AA       | NY57379802   | SRR2157021    | 2015            |                  | 7              | North America | United States | Enteritidis             | Enteritidis               | 1425  | 39458  |
| SAL_AA7173AA       | NY57379782   | SRR2157020    | 2015            |                  | 7              | North America | United States | Enteritidis             | Enteritidis               | 1425  | 39456  |
| SAL_AA7174AA       | NY57379764   | SRR2157019    | 2015            |                  | 7              | North America | United States | Enteritidis             | Enteritidis               | 1425  | 39455  |
| SAL_AA7175AA       | NY57379479   | SRR2157018    | 2015            |                  | 7              | North America | United States | Enteritidis             | Enteritidis               | 1425  | 39454  |
| SAL_AA7176AA       | NY57269529   | SRR2157017    | 2015            |                  | 6              | North America | United States | Enteritidis             | Enteritidis               | 1425  | 39453  |
| SAL_AA7177AA       | NY57269440   | SRR2157016    | 2015            |                  | 6              | North America | United States | Enteritidis             | Enteritidis               | 1425  | 39452  |
| SAL_AA7178AA       | NY57463012   | SRR2157015    | 2015            |                  | 7              | North America | United States | Enteritidis             | Enteritidis               | 1425  | 39451  |
| SAL_AA7179AA       | NY57194058   | SRR2157014    | 2015            |                  | 7              | North America | United States | Enteritidis             | Enteritidis               | 1425  | 39450  |
| SAL_AA7180AA       | NY57194005   | SRR2157013    | 2015            |                  | 6              | North America | United States | Enteritidis             | Enteritidis               | 1425  | 39449  |
| SAL_AA7181AA       | NY57269402   | SRR2135520    | 2015            |                  | 7              | North America | United States | Enteritidis             | Enteritidis               | 1425  | 39448  |
| SAL_AA7182AA       | NY57194181   | SRR2135519    | 2015            |                  | 7              | North America | United States | Enteritidis             | Enteritidis               | 1425  | 36786  |
| SAL_AA7183AA       | NY57194031   | SRR2135518    | 2015            |                  | 6              | North America | United States | Enteritidis             | Enteritidis               | 1425  | 39447  |
| SAL_AA7184AA       | NY57193981   | SRR2135517    | 2015            |                  | 7              | North America | United States | Enteritidis             | Enteritidis               | 1425  | 39446  |
| SAL_AA7185AA       | NY57193923   | SRR2135516    | 2015            |                  | 6              | North America | United States | Enteritidis             | Enteritidis               | 1425  | 39445  |
| SAL_AA7186AA       | NY57120837   | SRR2134757    | 2015            |                  | 6              | North America | United States | Enteritidis             | Enteritidis               | 1425  | 4151   |
| SAL_AA7187AA       | NY57120805   | SRR2134756    | 2015            |                  | 7              | North America | United States | Enteritidis             | Enteritidis               | 1425  | 39444  |
| SAL_AA7188AA       | NY57080271   | SRR2134755    | 2015            |                  | 6              | North America | United States | Enteritidis             | Enteritidis               | 1425  | 35685  |
| SAL_AA7189AA       | NY57079882   | SRR2134754    | 2015            |                  | 6              | North America | United States | Enteritidis             | Enteritidis               | 1425  | 4151   |
| SAL_AA7190AA       | NY57079867   | SRR2134753    | 2015            |                  | 6              | North America | United States | Enteritidis             | Enteritidis               | 1425  | 39443  |
| SAL_AA7191AA       | NY57079789   | SRR2134752    | 2015            |                  | 6              | North America | United States | Enteritidis             | Enteritidis               | 1425  | 35158  |
| SAL_AA7193AA       | NY57016525   | SRR2134750    | 2015            |                  | 6              | North America | United States | Enteritidis             | Enteritidis               | 1425  | 38200  |
| SAL_AA7199AA       | NY56962591   | SRR2103102    | 2015            |                  | 6              | North America | United States | Enteritidis             | Enteritidis               | 1425  | 39438  |
| SAL_AA7200AA       | NY56916987   | SRR2103101    | 2015            |                  | 6              | North America | United States | Enteritidis             | Enteritidis               | 1425  | 39437  |
| SAL_AA7201AA       | NY56916888   | SRR2103100    | 2015            |                  | 6              | North America | United States | Enteritidis             | Enteritidis               | 1425  | 39417  |
| SAL_AA7202AA       | NY56916864   | SRR2103099    | 2015            |                  | 6              | North America | United States | Enteritidis             | Enteritidis               | 1425  | 39436  |
| SAL_AA7203AA       | NY56916781   | SRR2103098    | 2015            |                  | 6              | North America | United States | Enteritidis             | Enteritidis               | 8003  | 39435  |
| SAL_AA7204AA       | NY56104917   | SRR2058336    | 2015            |                  | 4              | North America | United States | Enteritidis             | Enteritidis               | 1425  | 39434  |
| SAL_AA7205AA       | NY56104235   | SRR2058335    | 2015            |                  | 5              | North America | United States | Enteritidis             | Enteritidis               | 1425  | 2067   |
| SAL_AA7206AA       | NY56085813   | SRR2058334    | 2015            |                  | 4              | North America | United States | Enteritidis             | Enteritidis               | 1425  | 35024  |
| SAL_AA7207AA       | NY56085744   | SRR2058333    | 2015            |                  | 5              | North America | United States | Enteritidis             | Enteritidis               | 1425  | 39433  |
| SAL_AA7208AA       | NY55718321   | SRR2046762    | 2015            |                  | 4              | North America | United States | Enteritidis             | Enteritidis               | 1425  | 39415  |
| SAL_AA7209AA       | NY56058490   | SRR2046761    | 2015            |                  | 4              | North America | United States | Enteritidis             | Enteritidis               | 1425  | 39432  |

|              |                      |            |      |   |               |                |             |             |       |       |
|--------------|----------------------|------------|------|---|---------------|----------------|-------------|-------------|-------|-------|
| SAL_AA7210AA | NY56021291           | SRR2046760 | 2015 | 5 | North America | United States  | Enteritidis | Enteritidis | 27863 | 39431 |
| SAL_AA7211AA | NY56021276           | SRR2046759 | 2015 | 5 | North America | United States  | Enteritidis | Enteritidis | 1425  | 39430 |
| SAL_AA7212AA | NY56021260           | SRR2046757 | 2015 | 5 | North America | United States  | Enteritidis | Enteritidis | 1425  | 39429 |
| SAL_AA7213AA | NY55960920           | SRR2046756 | 2015 | 4 | North America | United States  | Enteritidis | Enteritidis | 1425  | 39428 |
| SAL_AA7214AA | NY55960901           | SRR2046755 | 2015 | 5 | North America | United States  | Enteritidis | Enteritidis | 1425  | 39427 |
| SAL_AA7215AA | NY55959906           | SRR2046754 | 2015 | 4 | North America | United States  | Enteritidis | Enteritidis | 1425  | 39426 |
| SAL_AA7216AA | NY55957804           | SRR2046753 | 2015 | 4 | North America | United States  | Enteritidis | Enteritidis | 1425  | 39425 |
| SAL_AA7217AA | NY55904079           | SRR2038211 | 2015 | 4 | North America | United States  | Enteritidis | Enteritidis | 1425  | 34170 |
| SAL_AA7218AA | NY55904057           | SRR2038209 | 2015 | 5 | North America | United States  | Enteritidis | Enteritidis | 1425  | 35024 |
| SAL_AA7219AA | NY55904042           | SRR2038208 | 2015 | 5 | North America | United States  | Enteritidis | Enteritidis | 1425  | 39424 |
| SAL_AA7220AA | NY55904150           | SRR2038207 | 2015 | 4 | North America | United States  | Enteritidis | Enteritidis | 1425  | 39423 |
| SAL_AA7221AA | NY55904129           | SRR2038205 | 2015 | 4 | North America | United States  | Enteritidis | Enteritidis | 1425  | 39422 |
| SAL_AA7222AA | NY55904116           | SRR2038204 | 2015 | 4 | North America | United States  | Enteritidis | Enteritidis | 1425  | 39421 |
| SAL_AA7223AA | NY55905266           | SRR2038203 | 2015 | 4 | North America | United States  | Enteritidis | Enteritidis | 1425  | 39420 |
| SAL_AA7224AA | NY55843228           | SRR2038202 | 2015 | 4 | North America | United States  | Enteritidis | Enteritidis | 1425  | 39419 |
| SAL_AA7225AA | NY55904096           | SRR2038201 | 2015 | 4 | North America | United States  | Enteritidis | Enteritidis | 1425  | 39418 |
| SAL_AA7226AA | NY55841185           | SRR2038200 | 2015 | 4 | North America | United States  | Enteritidis | Enteritidis | 1425  | 10271 |
| SAL_AA7227AA | NY55841159           | SRR2038199 | 2015 | 4 | North America | United States  | Enteritidis | Enteritidis | 1425  | 39417 |
| SAL_AA7228AA | NY55775996           | SRR2038193 | 2015 | 4 | North America | United States  | Enteritidis | Enteritidis | 1425  | 39416 |
| SAL_AA7229AA | NY55724498           | SRR2038192 | 2015 | 4 | North America | United States  | Enteritidis | Enteritidis | 1425  | 39411 |
| SAL_AA7230AA | NY55718253           | SRR2038191 | 2015 | 4 | North America | United States  | Enteritidis | Enteritidis | 1425  | 39415 |
| SAL_AA7231AA | NY55726209           | SRR2038190 | 2015 | 4 | North America | United States  | Enteritidis | Enteritidis | 1425  | 2668  |
| SAL_AA7232AA | NY55600339           | SRR2015103 | 2015 | 4 | North America | United States  | Enteritidis | Enteritidis | 1425  | 39414 |
| SAL_AA7233AA | NY55655771           | SRR2015102 | 2015 | 4 | North America | United States  | Enteritidis | Enteritidis | 26832 | 39413 |
| SAL_AA7234AA | NY55655753           | SRR2015101 | 2015 | 4 | North America | United States  | Enteritidis | Enteritidis | 1425  | 39412 |
| SAL_AA7235AA | NY55655740           | SRR2015100 | 2015 | 4 | North America | United States  | Enteritidis | Enteritidis | 1425  | 39411 |
| SAL_AA7236AA | NY55601119           | SRR2015099 | 2015 | 4 | North America | United States  | Enteritidis | Enteritidis | 1425  | 39410 |
| SAL_AA7237AA | NY55601028           | SRR2015098 | 2015 | 4 | North America | United States  | Enteritidis | Enteritidis | 1425  | 39409 |
| SAL_AA7238AA | NY55524586           | SRR2009035 | 2015 | 4 | North America | United States  | Enteritidis | Enteritidis | 27892 | 39408 |
| SAL_AA7239AA | NY55524554           | SRR2009034 | 2015 | 4 | North America | United States  | Enteritidis | Enteritidis | 1425  | 39407 |
| SAL_AA7240AA | NY55460189           | SRR2009033 | 2015 | 4 | North America | United States  | Enteritidis | Enteritidis | 1425  | 39406 |
| SAL_AA7241AA | NY55460127           | SRR2009032 | 2015 | 3 | North America | United States  | Enteritidis | Enteritidis | 1425  | 39405 |
| SAL_AA7242AA | NY55460091           | SRR2009031 | 2015 | 4 | North America | United States  | Enteritidis | Enteritidis | 1425  | 39404 |
| SAL_AA7243AA | NY55460078           | SRR2009020 | 2015 | 3 | North America | United States  | Enteritidis | Enteritidis | 1425  | 39403 |
| SAL_AA7244AA | NY55460066           | SRR2009019 | 2015 | 4 | North America | United States  | Enteritidis | Enteritidis | 1425  | 39402 |
| SAL_AA7245AA | NY55460057           | SRR2009018 | 2015 | 4 | North America | United States  | Enteritidis | Enteritidis | 1425  | 39401 |
| SAL_AA7246AA | NY55524779           | SRR2009017 | 2015 | 4 | North America | United States  | Enteritidis | Enteritidis | 1425  | 25754 |
| SAL_AA7247AA | NY55460048           | SRR2009016 | 2015 | 4 | North America | United States  | Enteritidis | Enteritidis | 1425  | 39400 |
| SAL_AA7248AA | NY55460039           | SRR2009015 | 2015 | 4 | North America | United States  | Enteritidis | Enteritidis | 1425  | 39399 |
| SAL_AA7249AA | NY55361901           | SRR2007821 | 2015 | 3 | North America | United States  | Enteritidis | Enteritidis | 1425  | 39398 |
| SAL_AA7250AA | NY55380215           | SRR2007820 | 2015 | 4 | North America | United States  | Enteritidis | Enteritidis | 1425  | 39397 |
| SAL_AA7251AA | NY55380204           | SRR2007819 | 2015 | 3 | North America | United States  | Enteritidis | Enteritidis | 1425  | 39397 |
| SAL_AA7252AA | NY55380194           | SRR2007818 | 2015 | 3 | North America | United States  | Enteritidis | Enteritidis | 1425  | 39396 |
| SAL_AA7253AA | NY55362073           | SRR2007817 | 2015 | 3 | North America | United States  | Enteritidis | Enteritidis | 1425  | 2323  |
| SAL_AA7254AA | NY55362061           | SRR2007816 | 2015 | 3 | North America | United States  | Enteritidis | Enteritidis | 1425  | 39395 |
| SAL_AA7255AA | NY55362024           | SRR2007815 | 2015 | 3 | North America | United States  | Enteritidis | Enteritidis | 1425  | 39394 |
| SAL_AA7256AA | NY55362012           | SRR2007814 | 2015 | 3 | North America | United States  | Enteritidis | Enteritidis | 1425  | 39393 |
| SAL_AA7257AA | NY_55306147          | SRR1979448 | 2015 | 3 | North America | United States  | Enteritidis | Enteritidis | 1425  | 39392 |
| SAL_AA7258AA | NY_55263483          | SRR1979447 | 2015 | 2 | North America | United States  | Enteritidis | Enteritidis | 1425  | 39391 |
| SAL_AA7259AA | NY_55235726          | SRR1979446 | 2015 | 3 | North America | United States  | Enteritidis | Enteritidis | 1425  | 39390 |
| SAL_AA7696AA | S038T                | ERR703076  |      |   |               |                | Typhimurium | Enteritidis | 1424  | 38996 |
| SAL_AA7724AA | S373S-sc-2004074     | ERR702993  |      |   |               |                | Typhimurium | Enteritidis | 1424  | 41461 |
| SAL_AA7750AA | S272T                | ERR703055  |      |   |               |                | Typhimurium | Enteritidis | 1424  | 39115 |
| SAL_AA7912AA | S102T                | ERR703025  |      |   |               |                | Typhimurium | Enteritidis | 1424  | 38996 |
| SAL_AA8060AA | Typhimurium          | ERR702719  |      |   |               |                | Typhimurium | Enteritidis | 1424  | 41254 |
| SAL_AA8383AA | 21115_H14242077501-2 | ERR653992  | 2014 | 6 | Europe        | United Kingdom | Enteritidis | Enteritidis | 3888  | 38714 |
| SAL_AA8384AA | 21114_H14242077401-2 | ERR653991  | 2014 | 6 | Europe        | United Kingdom | Enteritidis | Enteritidis | 3888  | 38713 |
| SAL_AA8385AA | 21113_H14242077301-2 | ERR653990  | 2014 | 6 | Europe        | United Kingdom | Enteritidis | Enteritidis | 3888  | 38712 |
| SAL_AA8392AA | 20927_H14244069301-1 | ERR653989  | 2014 | 6 | Europe        | United Kingdom | Enteritidis | Enteritidis | 3888  | 38709 |

|              |                            |            |      |   |               |                |                         |             |       |       |
|--------------|----------------------------|------------|------|---|---------------|----------------|-------------------------|-------------|-------|-------|
| SAL_AA8395AA | H142580393                 | ERR653333  | 2014 | 6 | Europe        | United Kingdom | Enteritidis             | Enteritidis | 3888  | 38706 |
| SAL_AA8396AA | 908767                     | ERR653331  | 2014 | 6 | Europe        | United Kingdom | Enteritidis (Predicted) | Enteritidis | 1425  | 38705 |
| SAL_AA8399AA | 907828                     | ERR653315  | 2014 | 6 | Europe        | United Kingdom | Enteritidis             | Enteritidis | 3888  | 38703 |
| SAL_AA8400AA | H142580394                 | ERR653334  | 2014 | 6 | Europe        | United Kingdom | Enteritidis             | Enteritidis | 3888  | 38702 |
| SAL_AA8401AA | 908735                     | ERR653329  | 2014 | 6 | Europe        | United Kingdom | Enteritidis (Predicted) | Enteritidis | 3888  | 38701 |
| SAL_AA8403AA | 908175                     | ERR653323  | 2014 | 6 | Europe        | United Kingdom | Enteritidis             | Enteritidis | 3888  | 38700 |
| SAL_AA8404AA | 908004                     | ERR653319  | 2014 | 6 | Europe        | United Kingdom | Enteritidis             | Enteritidis | 3888  | 38699 |
| SAL_AA8405AA | 907985                     | ERR653318  | 2014 | 6 | Europe        | United Kingdom | Enteritidis             | Enteritidis | 3888  | 38698 |
| SAL_AA8406AA | H142480277                 | ERR653332  | 2014 | 6 | Europe        | United Kingdom | Enteritidis             | Enteritidis | 3888  | 38697 |
| SAL_AA8407AA | 908736                     | ERR653330  | 2014 | 6 | Europe        | United Kingdom | Enteritidis (Predicted) | Enteritidis | -1700 | 38696 |
| SAL_AA8409AA | 908430                     | ERR653327  | 2014 | 6 | Europe        | United Kingdom | Enteritidis (Predicted) | Enteritidis | 3888  | 38695 |
| SAL_AA8410AA | 908390                     | ERR653325  | 2014 | 6 | Europe        | United Kingdom | Enteritidis             | Enteritidis | 3888  | 38694 |
| SAL_AA8411AA | 908151                     | ERR653322  | 2014 | 6 | Europe        | United Kingdom | Enteritidis             | Enteritidis | 3888  | 38693 |
| SAL_AA8412AA | 908127                     | ERR776485  | 2014 | 6 | Europe        | United Kingdom | Enteritidis (Predicted) | Enteritidis | 1425  | 38692 |
| SAL_AA8413AA | 908108                     | ERR653309  | 2014 | 6 | Europe        | United Kingdom | Enteritidis (Predicted) | Enteritidis | 1425  | 38691 |
| SAL_AA8415AA | 907774                     | ERR653305  | 2014 | 6 | Europe        | United Kingdom | Enteritidis (Predicted) | Enteritidis | 3888  | 38690 |
| SAL_AA8416AA | 907757                     | ERR653283  | 2014 | 6 | Europe        | United Kingdom | Enteritidis             | Enteritidis | 3888  | 674   |
| SAL_AA8417AA | 907724                     | ERR653282  | 2014 | 6 | Europe        | United Kingdom | Enteritidis             | Enteritidis | 3888  | 38689 |
| SAL_AA8418AA | 907678                     | ERR653281  | 2014 | 6 | Europe        | United Kingdom | Enteritidis             | Enteritidis | 3888  | 38688 |
| SAL_AA8419AA | 907608                     | ERR653279  | 2014 | 6 | Europe        | United Kingdom | Enteritidis             | Enteritidis | 3888  | 7381  |
| SAL_AA8420AA | 907603                     | ERR653278  | 2014 | 6 | Europe        | United Kingdom | Enteritidis             | Enteritidis | 3888  | 38687 |
| SAL_AA8421AA | 907568                     | ERR653277  | 2014 | 6 | Europe        | United Kingdom | Enteritidis             | Enteritidis | 3888  | 674   |
| SAL_AA8422AA | 907474                     | ERR653273  | 2014 | 6 | Europe        | United Kingdom | Enteritidis             | Enteritidis | 3888  | 38686 |
| SAL_AA8423AA | 907462                     | ERR653290  | 2014 | 6 | Europe        | United Kingdom | Enteritidis             | Enteritidis | 3888  | 38685 |
| SAL_AA8424AA | 906014                     | ERR653287  | 2014 | 6 | Europe        | United Kingdom | Enteritidis (Predicted) | Enteritidis | 1425  | 38684 |
| SAL_AA8426AA | 907659                     | ERR653301  | 2014 | 6 | Europe        | United Kingdom | Enteritidis             | Enteritidis | 3888  | 38683 |
| SAL_AA8427AA | 907812                     | ERR653285  | 2014 | 6 | Europe        | United Kingdom | Enteritidis             | Enteritidis | 3888  | 674   |
| SAL_AA8428AA | 907789                     | ERR653284  | 2014 | 6 | Europe        | United Kingdom | Enteritidis             | Enteritidis | 3888  | 38682 |
| SAL_AA8429AA | 907648                     | ERR653280  | 2014 | 6 | Europe        | United Kingdom | Enteritidis             | Enteritidis | 3888  | 674   |
| SAL_AA8431AA | 907555                     | ERR653276  | 2014 | 6 | Europe        | United Kingdom | Enteritidis             | Enteritidis | 3888  | 674   |
| SAL_AA8432AA | 907525                     | ERR653275  | 2014 | 6 | Europe        | United Kingdom | Enteritidis             | Enteritidis | 3888  | 674   |
| SAL_AA8433AA | 907513                     | ERR653293  | 2014 | 6 | Europe        | United Kingdom | Enteritidis (Predicted) | Enteritidis | 3888  | 38679 |
| SAL_AA8434AA | 907479                     | ERR653274  | 2014 | 6 | Europe        | United Kingdom | Enteritidis             | Enteritidis | 3888  | 38680 |
| SAL_AA8435AA | 907452                     | ERR653272  | 2014 | 6 | Europe        | United Kingdom | Enteritidis             | Enteritidis | 3888  | 674   |
| SAL_AA8436AA | 907378                     | ERR653271  | 2014 | 6 | Europe        | United Kingdom | Enteritidis             | Enteritidis | 3888  | 674   |
| SAL_AA8437AA | 112797                     | ERR653270  | 2014 | 6 | Europe        | United Kingdom | Enteritidis             | Enteritidis | 3888  | 38678 |
| SAL_AA8727AA | SE1385_06-sc-2013-07-15T1  | ERR357437  |      |   |               |                | Enteritidis             | Enteritidis | 1425  | 38487 |
| SAL_AA8728AA | SE1205_88-sc-2013-07-15T1  | ERR353350  |      |   |               |                | Enteritidis             | Enteritidis | 1425  | 38486 |
| SAL_AA8729AA | SE1638_90-sc-2013-07-15T1  | ERR357435  |      |   |               |                | Enteritidis             | Enteritidis | 1425  | 38485 |
| SAL_AA8730AA | SEAlbis_72-sc-2013-07-15T1 | ERR353348  |      |   |               |                | Enteritidis             | Enteritidis | 1425  | 38484 |
| SAL_AA8731AA | SE1224_05-sc-2013-07-15T1  | ERR353347  |      |   |               |                | Enteritidis             | Enteritidis | 1425  | 38483 |
| SAL_AA8732AA | SE736_95-sc-2013-07-15T10  | ERR357432  |      |   |               |                | Enteritidis             | Enteritidis | 1425  | 38482 |
| SAL_AA8733AA | SE42_13-sc-2013-07-15T10:  | ERR353345  |      |   |               |                | Enteritidis             | Enteritidis | 1425  | 38481 |
| SAL_AA8734AA | SE1347_11-sc-2013-07-15T1  | ERR357430  |      |   |               |                | Enteritidis             | Enteritidis | 1425  | 38480 |
| SAL_AA8810AA | 3094/3                     | ERR352731  |      |   |               |                | Typhi                   | Enteritidis | 3776  | 38428 |
| SAL_AA8812AA | 3524/3                     | ERR352598  |      |   |               |                | Typhi                   | Enteritidis | 3776  | 33525 |
| SAL_AA9076AA | 2010K_0627-sc-2013-04-23T  | ERR352173  |      |   |               |                | Enteritidis             | Enteritidis | 1424  | 38207 |
| SAL_AA9087AA | NY57819720                 | SRR2176357 | 2015 | 7 | North America | United States  | Enteritidis             | Enteritidis | 1425  | 38200 |
| SAL_AA9088AA | NY57819039                 | SRR2176356 | 2015 | 7 | North America | United States  | Enteritidis             | Enteritidis | 1425  | 36786 |
| SAL_AA9089AA | NY57819028                 | SRR2176282 | 2015 | 7 | North America | United States  | Enteritidis             | Enteritidis | 1425  | 38199 |
| SAL_AA9090AA | NY57720350                 | SRR2176160 | 2015 | 7 | North America | United States  | Enteritidis             | Enteritidis | 1425  | 10152 |
| SAL_AA9091AA | NY57720235                 | SRR2176159 | 2015 | 7 | North America | United States  | Enteritidis             | Enteritidis | 1425  | 38198 |
| SAL_AA9092AA | NY57720071                 | SRR2176158 | 2015 | 7 | North America | United States  | Enteritidis             | Enteritidis | 1425  | 38197 |
| SAL_AA9093AA | NY57594935                 | SRR2176157 | 2015 | 7 | North America | United States  | Enteritidis             | Enteritidis | 1425  | 38196 |
| SAL_AA9094AA | NY57594647                 | SRR2176156 | 2015 | 7 | North America | United States  | Enteritidis             | Enteritidis | 1425  | 38195 |
| SAL_AA9095AA | NY57593952                 | SRR2176155 | 2015 | 7 | North America | United States  | Enteritidis             | Enteritidis | 1425  | 38194 |
| SAL_AA9205AA | H0170036601-sc-1875030     | ERR501637  |      |   |               |                | Enteritidis             | Enteritidis | 1424  | 41007 |
| SAL_AA9206AA | D7795-sc-1875029           | ERR501636  |      |   |               |                | Enteritidis             | Enteritidis | 1424  | 41007 |
| SAL_AA9209AA | H0_9180_0482-sc-1875026    | ERR501633  |      |   |               |                | Enteritidis             | Enteritidis | 1424  | 41007 |

|              |                           |           |      |               |               |                         |             |       |       |
|--------------|---------------------------|-----------|------|---------------|---------------|-------------------------|-------------|-------|-------|
| SAL_AA9660AA | SARB18_FB                 | ERR424912 | 1988 | North America | United States | Enteritidis             | Enteritidis | 8183  | 37747 |
| SAL_AA9663AA | LH_M296                   | ERR424909 | 2001 | North America | United States | Enteritidis             | Enteritidis | 1425  | 37745 |
| SAL_AA9669AA | MZ0630                    | ERR424903 |      |               |               | Enteritidis             | Enteritidis | 1425  | 34011 |
| SAL_AA9770AA | UY0144-sc-2013-10-08T14:2 | ERR405726 |      |               |               | Enteritidis (Predicted) | Enteritidis | 26042 | 37646 |
| SAL_AA9774AA | UY0140-sc-2013-10-08T14:2 | ERR405722 |      |               |               | Enteritidis (Predicted) | Enteritidis | 1425  | 37642 |
| SAL_AA9806AA | UY050-sc-2013-10-08T14:24 | ERR405536 |      |               |               | Enteritidis (Predicted) | Enteritidis | 1425  | 37614 |
| SAL_AA9807AA | UY049-sc-2013-10-08T14:24 | ERR405535 |      |               |               | Enteritidis (Predicted) | Enteritidis | 26042 | 37613 |
| SAL_AA9808AA | UY048-sc-2013-10-08T14:24 | ERR405439 |      |               |               | Enteritidis (Predicted) | Enteritidis | 26042 | 37612 |
| SAL_AA9809AA | UY047-sc-2013-10-08T14:24 | ERR405533 |      |               |               | Enteritidis (Predicted) | Enteritidis | 26042 | 37611 |
| SAL_AA9810AA | UY046-sc-2013-10-08T14:24 | ERR405532 |      |               |               | Enteritidis (Predicted) | Enteritidis | 26042 | 37610 |
| SAL_AA9811AA | UY045-sc-2013-10-08T14:24 | ERR405436 |      |               |               | Enteritidis (Predicted) | Enteritidis | 26042 | 37610 |
| SAL_AA9812AA | UY044-sc-2013-10-08T14:24 | ERR405435 |      |               |               | Enteritidis (Predicted) | Enteritidis | 26042 | 37609 |
| SAL_AA9813AA | UY043-sc-2013-10-08T14:24 | ERR405529 |      |               |               | Enteritidis (Predicted) | Enteritidis | 26042 | 37608 |
| SAL_AA9826AA | UY041-sc-2013-10-08T14:24 | ERR405527 |      |               |               | Enteritidis (Predicted) | Enteritidis | 1425  | 37597 |
| SAL_AA9827AA | UY040-sc-2013-10-08T14:24 | ERR405526 |      |               |               | Enteritidis (Predicted) | Enteritidis | 26042 | 37596 |
| SAL_AA9828AA | UY039-sc-2013-10-08T14:24 | ERR405525 |      |               |               | Enteritidis (Predicted) | Enteritidis | 26042 | 37595 |
| SAL_AA9829AA | UY038-sc-2013-10-08T14:24 | ERR405429 |      |               |               | Enteritidis (Predicted) | Enteritidis | 26042 | 37594 |
| SAL_AA9830AA | UY037-sc-2013-10-08T14:24 | ERR405523 |      |               |               | Enteritidis (Predicted) | Enteritidis | 1425  | 37593 |
| SAL_AA9831AA | UY036-sc-2013-10-08T14:24 | ERR405522 |      |               |               | Enteritidis (Predicted) | Enteritidis | 1425  | 37592 |
| SAL_AA9832AA | UY035-sc-2013-10-08T14:24 | ERR405521 |      |               |               | Enteritidis (Predicted) | Enteritidis | 1425  | 37591 |
| SAL_AA9833AA | UY034-sc-2013-10-08T14:24 | ERR405520 |      |               |               | Enteritidis (Predicted) | Enteritidis | 1425  | 37590 |
| SAL_AA9834AA | UY033-sc-2013-10-08T14:24 | ERR405424 |      |               |               | Enteritidis (Predicted) | Enteritidis | 1425  | 37589 |
| SAL_AA9847AA | UY031-sc-2013-10-08T14:24 | ERR405517 |      |               |               | Enteritidis (Predicted) | Enteritidis | 1425  | 37578 |
| SAL_AA9848AA | UY030-sc-2013-10-08T14:24 | ERR405421 |      |               |               | Enteritidis (Predicted) | Enteritidis | 26042 | 37577 |
| SAL_AA9849AA | UY029-sc-2013-10-08T14:24 | ERR405515 |      |               |               | Enteritidis (Predicted) | Enteritidis | 26042 | 37576 |
| SAL_AA9850AA | UY028-sc-2013-10-08T14:24 | ERR405419 |      |               |               | Enteritidis (Predicted) | Enteritidis | 1425  | 37575 |
| SAL_AA9851AA | UY027-sc-2013-10-08T14:24 | ERR405513 |      |               |               | Enteritidis (Predicted) | Enteritidis | 1425  | 37574 |
| SAL_AA9852AA | UY026-sc-2013-10-08T14:24 | ERR405512 |      |               |               | Enteritidis (Predicted) | Enteritidis | 26042 | 37573 |
| SAL_AA9853AA | UY025-sc-2013-10-08T14:24 | ERR405416 |      |               |               | Enteritidis (Predicted) | Enteritidis | 26042 | 37572 |
| SAL_AA9854AA | UY024-sc-2013-10-08T14:24 | ERR405510 |      |               |               | Enteritidis (Predicted) | Enteritidis | 1425  | 37571 |
| SAL_AA9855AA | UY023-sc-2013-10-08T14:24 | ERR405509 |      |               |               | Enteritidis (Predicted) | Enteritidis | 26042 | 37570 |
| SAL_AA9856AA | UY022-sc-2013-10-08T14:24 | ERR405413 |      |               |               | Enteritidis (Predicted) | Enteritidis | 1425  | 37569 |
| SAL_AA9857AA | UY021-sc-2013-10-08T14:24 | ERR405507 |      |               |               | Enteritidis (Predicted) | Enteritidis | 1425  | 37568 |
| SAL_AA9863AA | UY0191-sc-2013-10-08T14:2 | ERR405677 |      |               |               | Enteritidis (Predicted) | Enteritidis | 1425  | 37564 |
| SAL_AA9869AA | UY020-sc-2013-10-08T14:24 | ERR405506 |      |               |               | Enteritidis (Predicted) | Enteritidis | 1425  | 37560 |
| SAL_AA9870AA | UY019-sc-2013-10-08T14:24 | ERR405505 |      |               |               | Enteritidis (Predicted) | Enteritidis | 1425  | 37559 |
| SAL_AA9871AA | UY018-sc-2013-10-08T14:24 | ERR405504 |      |               |               | Enteritidis (Predicted) | Enteritidis | 1425  | 37558 |
| SAL_AA9872AA | UY017-sc-2013-10-08T14:24 | ERR405503 |      |               |               | Enteritidis (Predicted) | Enteritidis | 1425  | 37557 |
| SAL_AA9873AA | UY016-sc-2013-10-08T14:24 | ERR405502 |      |               |               | Enteritidis (Predicted) | Enteritidis | 1425  | 37556 |
| SAL_AA9874AA | UY015-sc-2013-10-08T12:35 | ERR405406 |      |               |               | Enteritidis (Predicted) | Enteritidis | 1425  | 37555 |
| SAL_AA9875AA | UY014-sc-2013-10-08T12:42 | ERR405500 |      |               |               | Enteritidis (Predicted) | Enteritidis | 1425  | 37554 |
| SAL_AA9876AA | UY013-sc-2013-10-08T12:42 | ERR405499 |      |               |               | Enteritidis (Predicted) | Enteritidis | 1425  | 37553 |
| SAL_AA9877AA | UY012-sc-2013-10-08T12:36 | ERR405403 |      |               |               | Enteritidis (Predicted) | Enteritidis | 1425  | 37552 |
| SAL_AA9878AA | UY011-sc-2013-10-08T12:35 | ERR405497 |      |               |               | Enteritidis (Predicted) | Enteritidis | 1425  | 37551 |
| SAL_AA9879AA | UY010-sc-2013-10-08T12:35 | ERR405496 |      |               |               | Enteritidis (Predicted) | Enteritidis | 1425  | 37550 |
| SAL_AA9891AA | UY009-sc-2013-10-08T12:35 | ERR405495 |      |               |               | Enteritidis (Predicted) | Enteritidis | 1425  | 37538 |
| SAL_AA9892AA | UY008-sc-2013-10-08T12:35 | ERR405494 |      |               |               | Enteritidis (Predicted) | Enteritidis | 1425  | 37538 |
| SAL_AA9893AA | UY007-sc-2013-10-08T12:34 | ERR405493 |      |               |               | Enteritidis (Predicted) | Enteritidis | 26042 | 37537 |
| SAL_AA9894AA | UY006-sc-2013-10-08T12:35 | ERR405492 |      |               |               | Enteritidis (Predicted) | Enteritidis | 26042 | 37536 |
| SAL_AA9895AA | UY005-sc-2013-10-08T12:35 | ERR405491 |      |               |               | Enteritidis (Predicted) | Enteritidis | 26042 | 37535 |
| SAL_AA9896AA | UY004-sc-2013-10-08T12:35 | ERR405490 |      |               |               | Enteritidis (Predicted) | Enteritidis | 26042 | 37532 |
| SAL_AA9897AA | UY003-sc-2013-10-08T12:34 | ERR405394 |      |               |               | Enteritidis (Predicted) | Enteritidis | 26042 | 37534 |
| SAL_AA9898AA | UY002-sc-2013-10-08T12:34 | ERR405488 |      |               |               | Enteritidis (Predicted) | Enteritidis | 26042 | 37533 |
| SAL_AA9899AA | UY001-sc-2013-10-08T11:53 | ERR405487 |      |               |               | Enteritidis (Predicted) | Enteritidis | 26042 | 37532 |
| SAL_AA9902AA | UY0174-sc-2013-10-08T14:2 | ERR405660 |      |               |               | Enteritidis (Predicted) | Enteritidis | 26042 | 37529 |
| SAL_AA9904AA | UY0172-sc-2013-10-08T14:2 | ERR405658 |      |               |               | Enteritidis (Predicted) | Enteritidis | 1425  | 37527 |
| SAL_AA9955AA | UY070-sc-2013-10-08T14:25 | ERR405556 |      |               |               | Enteritidis (Predicted) | Enteritidis | 1425  | 37477 |
| SAL_BA0004AA | KeN136                    | ERR387691 |      |               |               | Enteritidis             | Enteritidis | 3801  | 37435 |
| SAL_BA0005AA | KeN134                    | ERR387690 |      |               |               | Enteritidis             | Enteritidis | 1425  | 37434 |

|              |                            |           |             |             |      |       |
|--------------|----------------------------|-----------|-------------|-------------|------|-------|
| SAL_BA0006AA | KeN133                     | ERR387689 | Enteritidis | Enteritidis | 1425 | 37433 |
| SAL_BA0007AA | KeN132                     | ERR387688 | Enteritidis | Enteritidis | 1425 | 37432 |
| SAL_BA0008AA | KeN130                     | ERR387687 | Enteritidis | Enteritidis | 1425 | 37431 |
| SAL_BA0009AA | KeN129                     | ERR387686 | Enteritidis | Enteritidis | 1425 | 37430 |
| SAL_BA0010AA | KeN128                     | ERR387685 | Enteritidis | Enteritidis | 1425 | 37429 |
| SAL_BA0011AA | KeN126                     | ERR387684 | Enteritidis | Enteritidis | 1425 | 37428 |
| SAL_BA0012AA | KeN125                     | ERR387683 | Enteritidis | Enteritidis | 1425 | 41258 |
| SAL_BA0013AA | KeN124                     | ERR387682 | Enteritidis | Enteritidis | 8469 | 41257 |
| SAL_BA0014AA | KeN123                     | ERR387681 | Enteritidis | Enteritidis | 1425 | 41256 |
| SAL_BA0015AA | KeN117                     | ERR387680 | Enteritidis | Enteritidis | 1424 | 37427 |
| SAL_BA0016AA | KeN116                     | ERR387679 | Enteritidis | Enteritidis | 1425 | 41255 |
| SAL_BA0017AA | KeN65                      | ERR387678 | Enteritidis | Enteritidis | 1425 | 41501 |
| SAL_BA0018AA | KeN62                      | ERR387677 | Enteritidis | Enteritidis | 1425 | 41289 |
| SAL_BA0019AA | KeN51                      | ERR387676 | Enteritidis | Enteritidis | 1425 | 41492 |
| SAL_BA0021AA | KeN31                      | ERR387674 | Enteritidis | Enteritidis | 1425 | 37426 |
| SAL_BA0022AA | KeN29                      | ERR387673 | Enteritidis | Enteritidis | 1425 | 41287 |
| SAL_BA0024AA | KeN27                      | ERR387671 | Enteritidis | Enteritidis | 1425 | 37424 |
| SAL_BA0025AA | KeN24                      | ERR387670 | Enteritidis | Enteritidis | 1425 | 37423 |
| SAL_BA0026AA | KeN23                      | ERR387669 | Enteritidis | Enteritidis | 1425 | 37423 |
| SAL_BA0027AA | KeN21                      | ERR387668 | Enteritidis | Enteritidis | 1425 | 41286 |
| SAL_BA0032AA | KeN9                       | ERR387663 | Enteritidis | Enteritidis | 1425 | 41285 |
| SAL_BA0034AA | KeN3                       | ERR387661 | Enteritidis | Enteritidis | 1425 | 41284 |
| SAL_BA0035AA | KeN1                       | ERR387660 | Enteritidis | Enteritidis | 1425 | 41283 |
| SAL_BA0044AA | KeN39                      | ERR387651 | Enteritidis | Enteritidis | 1425 | 41282 |
| SAL_BA0046AA | KeN143                     | ERR387723 | Enteritidis | Enteritidis | 1425 | 37419 |
| SAL_BA0074AA | KeN149                     | ERR387695 | Enteritidis | Enteritidis | 1425 | 41281 |
| SAL_BA0075AA | KeN142                     | ERR387694 | Enteritidis | Enteritidis | 1425 | 37397 |
| SAL_BA0078AA | J55-sc-2013-05-22T09:56:54 | ERR374248 | Enteritidis | Enteritidis | 1425 | 37395 |
| SAL_BA0080AA | W24-sc-2013-05-22T09:57:3  | ERR374246 | Enteritidis | Enteritidis | 1425 | 37393 |
| SAL_BA0081AA | W4-sc-2013-05-22T09:57:33  | ERR374245 | Enteritidis | Enteritidis | 1425 | 37392 |
| SAL_BA0083AA | P177-sc-2013-05-22T09:57:0 | ERR374243 | Enteritidis | Enteritidis | 7944 | 37391 |
| SAL_BA0084AA | W19-sc-2013-05-22T09:57:3  | ERR374242 | Enteritidis | Enteritidis | 1425 | 37390 |
| SAL_BA0085AA | T129-sc-2013-05-22T09:57:2 | ERR374241 | Enteritidis | Enteritidis | 1425 | 37389 |
| SAL_BA0086AA | I15-sc-2013-05-22T09:56:47 | ERR374240 | Enteritidis | Enteritidis | 1425 | 37388 |
| SAL_BA0087AA | S56-sc-2013-05-22T09:57:14 | ERR374239 | Enteritidis | Enteritidis | 1425 | 37387 |
| SAL_BA0088AA | S85-sc-2013-05-22T09:57:17 | ERR374238 | Enteritidis | Enteritidis | 1425 | 37386 |
| SAL_BA0089AA | X25-sc-2013-05-22T09:57:25 | ERR374237 | Enteritidis | Enteritidis | 7944 | 37385 |
| SAL_BA0090AA | V91-sc-2013-05-22T09:57:29 | ERR374236 | Enteritidis | Enteritidis | 1425 | 37376 |
| SAL_BA0091AA | S4-sc-2013-05-22T09:57:122 | ERR374235 | Enteritidis | Enteritidis | 1425 | 37384 |
| SAL_BA0092AA | S76-sc-2013-05-22T09:57:15 | ERR374234 | Enteritidis | Enteritidis | 1425 | 37383 |
| SAL_BA0093AA | R74-sc-2013-05-22T09:57:13 | ERR374233 | Enteritidis | Enteritidis | 1425 | 37382 |
| SAL_BA0094AA | W42-sc-2013-05-22T09:57:3  | ERR374232 | Enteritidis | Enteritidis | 1425 | 37381 |
| SAL_BA0095AA | X41-sc-2013-05-22T09:57:32 | ERR374231 | Enteritidis | Enteritidis | 1425 | 37380 |
| SAL_BA0096AA | V95-sc-2013-05-22T09:57:30 | ERR374230 | Enteritidis | Enteritidis | 1425 | 37379 |
| SAL_BA0097AA | W47-sc-2013-05-22T09:57:0  | ERR374229 | Enteritidis | Enteritidis | 1425 | 37378 |
| SAL_BA0098AA | I23-sc-2013-05-22T09:56:48 | ERR374228 | Enteritidis | Enteritidis | 1425 | 37377 |
| SAL_BA0099AA | X36-sc-2013-05-22T09:57:31 | ERR374227 | Enteritidis | Enteritidis | 1425 | 37376 |
| SAL_BA0100AA | T159-sc-2013-05-22T09:57:2 | ERR374226 | Enteritidis | Enteritidis | 1425 | 37375 |
| SAL_BA0101AA | R53-sc-2013-05-22T09:57:11 | ERR374225 | Enteritidis | Enteritidis | 1425 | 41280 |
| SAL_BA0102AA | D79-sc-2013-05-22T09:56:43 | ERR374224 | Enteritidis | Enteritidis | 1425 | 37362 |
| SAL_BA0103AA | V7-sc-2013-05-22T09:57:262 | ERR374223 | Enteritidis | Enteritidis | 1425 | 37374 |
| SAL_BA0104AA | T103-sc-2013-05-22T09:57:2 | ERR374222 | Enteritidis | Enteritidis | 1425 | 37373 |
| SAL_BA0105AA | J39-sc-2013-05-22T09:56:52 | ERR374221 | Enteritidis | Enteritidis | 1425 | 37367 |
| SAL_BA0106AA | V55-sc-2013-05-22T09:57:28 | ERR374220 | Enteritidis | Enteritidis | 1425 | 37371 |
| SAL_BA0107AA | T145-sc-2013-05-22T09:57:2 | ERR374219 | Enteritidis | Enteritidis | 1425 | 37372 |
| SAL_BA0108AA | J73-sc-2013-05-22T09:56:55 | ERR374218 | Enteritidis | Enteritidis | 1425 | 37370 |
| SAL_BA0109AA | Q76-sc-2013-05-22T09:57:0  | ERR374217 | Enteritidis | Enteritidis | 1425 | 37369 |
| SAL_BA0110AA | V39-sc-2013-05-22T09:57:27 | ERR374216 | Enteritidis | Enteritidis | 1425 | 37368 |
| SAL_BA0111AA | J35-sc-2013-05-22T09:56:51 | ERR374215 | Enteritidis | Enteritidis | 1425 | 37367 |

SAL\_BA0112AA I74-sc-2013-05-22T09:56:50:ERR374214  
SAL\_BA0113AA P52-sc-2013-05-22T09:56:56:ERR374213  
SAL\_BA0114AA S90-sc-2013-05-22T09:57:18:ERR374212  
SAL\_BA0115AA T46-sc-2013-05-22T09:57:20:ERR374211  
SAL\_BA0116AA I60-sc-2013-05-22T09:56:49:ERR374210  
SAL\_BA0117AA P115-sc-2013-05-22T09:56:55:ERR374209  
SAL\_BA0118AA P83-sc-2013-05-22T09:56:57:ERR374208  
SAL\_BA0119AA Q48-sc-2013-05-22T09:57:0:ERR374207  
SAL\_BA0120AA 17\_65-sc-2013-06-10T14:58:ERR369421  
SAL\_BA0122AA 4\_55-sc-2013-06-10T14:58:0:ERR369419  
SAL\_BA0123AA 201007599-sc-2013-06-10T1:ERR369418  
SAL\_BA0124AA 02\_8821-sc-2013-06-10T14:ERR369417  
SAL\_BA0125AA 201007105-sc-2013-06-10T1:ERR369416  
SAL\_BA0127AA 201008619-sc-2013-06-10T1:ERR369414  
SAL\_BA0128AA 04\_7098-sc-2013-06-10T14:ERR369413  
SAL\_BA0129AA 00\_5185-sc-2013-06-10T14:ERR369412  
SAL\_BA0131AA 3\_58-sc-2013-06-10T14:58:0:ERR369410  
SAL\_BA0132AA 02\_3090-sc-2013-06-10T14:ERR369409  
SAL\_BA0133AA 02\_3077-sc-2013-06-10T14:ERR369408  
SAL\_BA0134AA 30\_58-sc-2013-06-10T14:58:ERR369407  
SAL\_BA0135AA 04\_6072-sc-2013-06-10T14:ERR369406  
SAL\_BA0136AA 201004918-sc-2013-06-10T1:ERR369405  
SAL\_BA0137AA 01\_4553-sc-2013-06-10T14:ERR369404  
SAL\_BA0138AA 05\_6321-sc-2013-06-10T14:ERR369403  
SAL\_BA0139AA 98\_10272-sc-2013-06-10T14:ERR369402  
SAL\_BA0141AA 03\_0779-sc-2013-06-10T14:ERR369400  
SAL\_BA0142AA 201008533-sc-2013-06-10T1:ERR369399  
SAL\_BA0143AA 3\_66-sc-2013-06-10T14:58:2:ERR369398  
SAL\_BA0145AA 08\_7427-sc-2013-06-10T14:ERR369396  
SAL\_BA0147AA 34\_61-sc-2013-06-10T14:58:ERR369394  
SAL\_BA0149AA 9\_63-sc-2013-06-10T14:58:1:ERR369392  
SAL\_BA0150AA 11\_66-sc-2013-06-10T14:58:ERR369391  
SAL\_BA0151AA 16\_65-sc-2013-06-10T14:58:ERR369390  
SAL\_BA0152AA 03\_2506-sc-2013-06-10T14:ERR369389  
SAL\_BA0153AA 94\_9599-sc-2013-06-10T14:ERR369388  
SAL\_BA0154AA 04\_5767-sc-2013-06-10T14:ERR369387  
SAL\_BA0155AA 06\_0237-sc-2013-06-10T14:ERR369386  
SAL\_BA0156AA 06\_6191-sc-2013-06-10T14:ERR369385  
SAL\_BA0157AA 201008943-sc-2013-06-10T1:ERR369384  
SAL\_BA0158AA 7\_55-sc-2013-06-10T14:58:0:ERR369383  
SAL\_BA0159AA 02\_3084-sc-2013-06-10T14:ERR369382  
SAL\_BA0162AA 201003883-sc-2013-06-10T1:ERR369379  
SAL\_BA0163AA 201301913-sc-2013-06-10T1:ERR369378  
SAL\_BA0164AA 16\_57-sc-2013-06-10T14:57:ERR369377  
SAL\_BA0165AA 03\_0448-sc-2013-06-10T14:ERR369376  
SAL\_BA0166AA SE85\_1233-sc-2013-06-10T1:ERR369375  
SAL\_BA0167AA 00\_2993-sc-2013-06-10T14:ERR369374  
SAL\_BA0169AA 09\_4553-sc-2013-06-10T14:ERR369372  
SAL\_BA0170AA 00\_7482-sc-2013-06-10T14:ERR369371  
SAL\_BA0171AA 01\_4533-sc-2013-06-10T14:ERR369370  
SAL\_BA0172AA 201000446-sc-2013-06-10T1:ERR369369  
SAL\_BA0173AA 201005749-sc-2013-06-10T1:ERR369368  
SAL\_BA0174AA 34\_58-sc-2013-06-10T14:58:ERR369367  
SAL\_BA0175AA 8\_55-sc-2013-06-10T14:58:0:ERR369366  
SAL\_BA0176AA 94\_8098-sc-2013-06-10T14:ERR369365  
SAL\_BA0177AA 201009544-sc-2013-06-10T1:ERR369364  
SAL\_BA0179AA 94\_8355-sc-2013-06-10T14:ERR369362  
SAL\_BA0181AA 06\_2966-sc-2013-06-10T14:ERR369360  
SAL\_BA0182AA 06\_6063-sc-2013-06-10T14:ERR369359

Enteritidis 1425 37366  
Enteritidis 1425 37365  
Enteritidis 1425 37364  
Enteritidis 1425 37363  
Enteritidis 1425 37362  
Enteritidis 1425 37361  
Enteritidis 1425 37360  
Enteritidis 1425 37358  
Enteritidis 1425 37359  
Enteritidis 1425 37356  
Enteritidis 1425 37355  
Enteritidis 1425 37354  
Enteritidis 1425 37353  
Enteritidis 1425 37351  
Enteritidis 1425 37350  
Enteritidis 1425 37349  
Enteritidis 1425 37347  
Enteritidis 1425 37346  
Enteritidis 1425 37345  
Enteritidis 1425 37344  
Enteritidis 1425 37343  
Enteritidis 1425 37342  
Enteritidis 1425 37341  
Enteritidis 1425 37340  
Enteritidis 3842 37339  
Enteritidis 1425 37337  
Enteritidis 3888 37336  
Enteritidis 1425 37335  
Enteritidis 3888 37333  
Enteritidis 7948 37331  
Enteritidis 7939 37329  
Enteritidis 1425 37328  
Enteritidis 1425 37327  
Enteritidis 1425 37326  
Enteritidis 1425 37325  
Enteritidis 1425 37324  
Enteritidis 1425 37323  
Enteritidis 1425 37322  
Enteritidis 1425 37321  
Enteritidis 7940 37320  
Enteritidis 1425 37319  
Enteritidis 7942 37316  
Enteritidis 1425 37315  
Enteritidis 3842 37314  
Enteritidis 1425 37313  
Enteritidis 1424 37312  
Enteritidis 7944 37311  
Enteritidis 1425 37309  
Enteritidis 1425 37308  
Enteritidis 1425 37307  
Enteritidis 1425 37306  
Enteritidis 1425 37305  
Enteritidis 1425 37304  
Enteritidis 1425 37303  
Enteritidis 1424 37302  
Enteritidis 1425 37301  
Enteritidis 1425 37299  
Enteritidis 1425 37297  
Enteritidis 1425 37296

|              |                            |            |      |   |               |               |  |             |             |       |       |
|--------------|----------------------------|------------|------|---|---------------|---------------|--|-------------|-------------|-------|-------|
| SAL_BA0185AA | 201101618-sc-2013-06-10T1  | ERR369356  |      |   |               |               |  | Enteritidis | Enteritidis | 3888  | 37293 |
| SAL_BA0186AA | 93_2136-sc-2013-06-10T14:! | ERR369355  |      |   |               |               |  | Enteritidis | Enteritidis | 1425  | 37292 |
| SAL_BA0187AA | 94_4688-sc-2013-06-10T14:! | ERR369354  |      |   |               |               |  | Enteritidis | Enteritidis | 1424  | 37291 |
| SAL_BA0188AA | 17_60-sc-2013-06-10T14:58: | ERR369353  |      |   |               |               |  | Enteritidis | Enteritidis | 1425  | 37290 |
| SAL_BA0189AA | 93_5337-sc-2013-06-10T14:! | ERR369352  |      |   |               |               |  | Enteritidis | Enteritidis | 1425  | 37289 |
| SAL_BA0192AA | 20_55-sc-2013-06-10T14:58: | ERR369349  |      |   |               |               |  | Enteritidis | Enteritidis | 3842  | 37286 |
| SAL_BA0193AA | 201300358-sc-2013-06-10T1  | ERR369348  |      |   |               |               |  | Enteritidis | Enteritidis | 1425  | 37285 |
| SAL_BA0194AA | 92_3273-sc-2013-06-10T14:! | ERR369347  |      |   |               |               |  | Enteritidis | Enteritidis | 7962  | 37284 |
| SAL_BA0195AA | 98_2244-sc-2013-06-10T14:! | ERR369346  |      |   |               |               |  | Enteritidis | Enteritidis | 1425  | 37283 |
| SAL_BA0196AA | 93_7053-sc-2013-06-10T14:! | ERR369345  |      |   |               |               |  | Enteritidis | Enteritidis | 1425  | 37282 |
| SAL_BA0197AA | R42-sc-2013-05-22T09:57:10 | ERR369344  |      |   |               |               |  | Enteritidis | Enteritidis | 1425  | 37281 |
| SAL_BA0198AA | T27-sc-2013-05-22T09:57:19 | ERR369343  |      |   |               |               |  | Enteritidis | Enteritidis | 7944  | 37280 |
| SAL_BA0199AA | Q64-sc-2013-05-22T09:57:0: | ERR369342  |      |   |               |               |  | Enteritidis | Enteritidis | 1425  | 37279 |
| SAL_BA0200AA | P149-sc-2013-05-22T09:56:5 | ERR369341  |      |   |               |               |  | Enteritidis | Enteritidis | 1425  | 37278 |
| SAL_BA0544AA | 3395/3                     | ERR357546  |      |   |               |               |  | Typhi       | Enteritidis | 3776  | 37030 |
| SAL_BA0608AA | 3154/3                     | ERR357616  |      |   |               |               |  | Typhi       | Enteritidis | 3776  | 33191 |
| SAL_BA0639AA | 3239/3                     | ERR357503  |      |   |               |               |  | Typhi       | Enteritidis | 3776  | 33554 |
| SAL_BA0705AA | 15MN00384                  | SRR2175357 | 2015 | 8 | North America | United States |  | Enteritidis | Enteritidis | 26543 | 36912 |
| SAL_BA0706AA | 15MN00383                  | SRR2175356 | 2015 | 7 | North America | United States |  | Enteritidis | Enteritidis | 1425  | 36911 |
| SAL_BA0720AA | 15MN00385                  | SRR2175342 | 2015 | 8 | North America | United States |  | Enteritidis | Enteritidis | 1425  | 36903 |
| SAL_BA0728AA | 15MN00394                  | SRR2175334 | 2015 | 7 | North America | United States |  | Enteritidis | Enteritidis | 1425  | 14335 |
| SAL_BA0809AA | FDA00001998                | SRR2174134 | 2004 | 1 | North America | United States |  | Enteritidis | Enteritidis | 1425  | 9571  |
| SAL_BA0841AA | FDA00002000                | SRR2174099 | 2004 | 1 | North America | United States |  | Enteritidis | Enteritidis | 1425  | 36850 |
| SAL_BA0864AA | CFSAN035291                | SRR2174074 | 2012 |   | North America | United States |  | Enteritidis | Enteritidis | 1425  | 36838 |
| SAL_BA0894AA | CFSAN035302                | SRR2533373 | 2012 |   | North America | United States |  | Enteritidis | Enteritidis | 1425  | 36824 |
| SAL_BA0948AA | CFSAN035289                | SRR2533364 | 2012 |   | North America | United States |  | Enteritidis | Enteritidis | 1425  | 36801 |
| SAL_BA0957AA | FDA00001999                | SRR2173976 | 2004 | 1 | North America | United States |  | Enteritidis | Enteritidis | 1425  | 9571  |
| SAL_BA0969AA | NY57719970                 | SRR2168974 | 2015 | 7 | North America | United States |  | Enteritidis | Enteritidis | 1425  | 36789 |
| SAL_BA0970AA | NY57719739                 | SRR2168973 | 2015 | 7 | North America | United States |  | Enteritidis | Enteritidis | 1425  | 36788 |
| SAL_BA0971AA | NY57594977                 | SRR2168972 | 2015 | 7 | North America | United States |  | Enteritidis | Enteritidis | 1425  | 36787 |
| SAL_BA0972AA | NY57290959                 | SRR2168971 | 2015 | 7 | North America | United States |  | Enteritidis | Enteritidis | 1425  | 36786 |
| SAL_BA0973AA | NY57269583                 | SRR2168970 | 2015 | 7 | North America | United States |  | Enteritidis | Enteritidis | 1425  | 36785 |
| SAL_BA1041AA | CFSAN035309                | SRR2163268 | 2012 |   | North America | United States |  | Enteritidis | Enteritidis | 26162 | 36733 |
| SAL_BA1054AA | CFSAN035315                | SRR2163249 | 2012 |   | North America | United States |  | Enteritidis | Enteritidis | 1425  | 36723 |
| SAL_BA1055AA | CFSAN035308                | SRR2163248 | 2012 |   | North America | United States |  | Enteritidis | Enteritidis | 1425  | 36722 |
| SAL_BA1061AA | NY_55224659                | SRR1964511 | 2015 | 3 | North America | United States |  | Enteritidis | Enteritidis | 1425  | 36718 |
| SAL_BA1062AA | NY_55224652                | SRR1964510 | 2015 | 3 | North America | United States |  | Enteritidis | Enteritidis | 1425  | 36717 |
| SAL_BA1063AA | NY_55119574                | SRR1964503 | 2015 | 3 | North America | United States |  | Enteritidis | Enteritidis | 1425  | 36716 |
| SAL_BA1064AA | NY_55066753                | SRR1951991 | 2015 | 3 | North America | United States |  | Enteritidis | Enteritidis | 1425  | 36715 |
| SAL_BA1065AA | NY_55066704                | SRR1951990 | 2015 | 3 | North America | United States |  | Enteritidis | Enteritidis | 1425  | 36714 |
| SAL_BA1066AA | NY_55041710                | SRR1951989 | 2015 | 3 | North America | United States |  | Enteritidis | Enteritidis | 1425  | 36713 |
| SAL_BA1067AA | NY_55041702                | SRR1951987 | 2015 | 3 | North America | United States |  | Enteritidis | Enteritidis | 1425  | 36712 |
| SAL_BA1068AA | NY_55041601                | SRR1951986 | 2015 | 3 | North America | United States |  | Enteritidis | Enteritidis | 1425  | 32855 |
| SAL_BA1069AA | NY_55038755                | SRR1951985 | 2015 | 3 | North America | United States |  | Enteritidis | Enteritidis | 1425  | 36711 |
| SAL_BA1070AA | NY-swgs1629                | SRR1944531 | 2015 | 3 | North America | United States |  | Enteritidis | Enteritidis | 1425  | 10271 |
| SAL_BA1071AA | NY-swgs1628                | SRR1944530 | 2015 | 2 | North America | United States |  | Enteritidis | Enteritidis | 1425  | 36710 |
| SAL_BA1072AA | NY-swgs1627                | SRR1944529 | 2015 | 2 | North America | United States |  | Enteritidis | Enteritidis | 1425  | 36709 |
| SAL_BA1073AA | NY-swgs1626                | SRR1944528 | 2015 | 2 | North America | United States |  | Enteritidis | Enteritidis | 3888  | 24864 |
| SAL_BA1074AA | NY-swgs1624                | SRR1917116 | 2015 | 2 | North America | United States |  | Enteritidis | Enteritidis | 1425  | 36708 |
| SAL_BA1075AA | NY-swgs1623                | SRR1917115 | 2015 | 2 | North America | United States |  | Enteritidis | Enteritidis | 1425  | 36707 |
| SAL_BA1076AA | NY-swgs1622                | SRR1917114 | 2015 | 2 | North America | United States |  | Enteritidis | Enteritidis | 28557 | 36706 |
| SAL_BA1077AA | NY-swgs1621                | SRR1917113 | 2015 | 2 | North America | United States |  | Enteritidis | Enteritidis | 1425  | 36700 |
| SAL_BA1078AA | NY-swgs1620                | SRR1917112 | 2015 | 2 | North America | United States |  | Enteritidis | Enteritidis | 1425  | 36705 |
| SAL_BA1079AA | NY-swgs1619                | SRR1917111 | 2015 | 2 | North America | United States |  | Enteritidis | Enteritidis | 1425  | 36704 |
| SAL_BA1080AA | NY-swgs1618                | SRR1917110 | 2015 | 2 | North America | United States |  | Enteritidis | Enteritidis | 1425  | 36703 |
| SAL_BA1081AA | NY-swgs1617                | SRR1917109 | 2015 | 2 | North America | United States |  | Enteritidis | Enteritidis | 1425  | 36702 |
| SAL_BA1082AA | NY-swgs1625                | SRR1917108 | 2015 | 2 | North America | United States |  | Enteritidis | Enteritidis | 1425  | 1201  |
| SAL_BA1083AA | NY-swgs1616                | SRR1917106 | 2015 | 2 | North America | United States |  | Enteritidis | Enteritidis | 1425  | 36701 |
| SAL_BA1084AA | NY-swgs1615                | SRR1917104 | 2015 | 2 | North America | United States |  | Enteritidis | Enteritidis | 1425  | 36700 |

|              |             |            |      |    |               |               |             |             |       |       |
|--------------|-------------|------------|------|----|---------------|---------------|-------------|-------------|-------|-------|
| SAL_BA1085AA | NY-swgs1612 | SRR1910382 | 2015 | 2  | North America | United States | Enteritidis | Enteritidis | 1425  | 36699 |
| SAL_BA1086AA | NY-swgs1611 | SRR1910380 | 2015 | 2  | North America | United States | Enteritidis | Enteritidis | 1425  | 36698 |
| SAL_BA1087AA | NY-swgs1610 | SRR1910379 | 2015 | 2  | North America | United States | Enteritidis | Enteritidis | 1425  | 26097 |
| SAL_BA1088AA | NY-swgs1609 | SRR1910378 | 2015 | 1  | North America | United States | Enteritidis | Enteritidis | 1425  | 36697 |
| SAL_BA1089AA | NY-swgs1608 | SRR1910376 | 2015 | 2  | North America | United States | Enteritidis | Enteritidis | 1425  | 36696 |
| SAL_BA1090AA | NY-swgs1607 | SRR1910374 | 2013 | 2  | North America | United States | Enteritidis | Enteritidis | 27921 | 36695 |
| SAL_BA1091AA | NY-swgs1606 | SRR1910372 | 2012 | 8  | North America | United States | Enteritidis | Enteritidis | 27921 | 36694 |
| SAL_BA1092AA | NY-swgs1605 | SRR1910371 | 2011 | 9  | North America | United States | Enteritidis | Enteritidis | 1425  | 36693 |
| SAL_BA1093AA | NY-swgs1614 | SRR1910370 | 2015 | 2  | North America | United States | Enteritidis | Enteritidis | 8003  | 12205 |
| SAL_BA1094AA | NY-swgs1613 | SRR1910369 | 2015 | 2  | North America | United States | Enteritidis | Enteritidis | 1425  | 36692 |
| SAL_BA1095AA | NY-swgs1604 | SRR1910368 | 2011 | 6  | North America | United States | Enteritidis | Enteritidis | 1425  | 36691 |
| SAL_BA1096AA | NY-swgs1603 | SRR1910367 | 2010 | 8  | North America | United States | Enteritidis | Enteritidis | 1425  | 36690 |
| SAL_BA1097AA | NY-swgs1602 | SRR1813479 | 2015 | 2  | North America | United States | Enteritidis | Enteritidis | 1425  | 16644 |
| SAL_BA1098AA | NY-swgs1601 | SRR1813478 | 2015 | 2  | North America | United States | Enteritidis | Enteritidis | 1425  | 36686 |
| SAL_BA1099AA | NY-swgs1600 | SRR1813477 | 2015 | 2  | North America | United States | Enteritidis | Enteritidis | 1425  | 36689 |
| SAL_BA1100AA | NY-swgs1599 | SRR1813475 | 2015 | 2  | North America | United States | Enteritidis | Enteritidis | 1425  | 36688 |
| SAL_BA1101AA | NY-swgs1598 | SRR1813474 | 2015 | 2  | North America | United States | Enteritidis | Enteritidis | 1425  | 36687 |
| SAL_BA1102AA | NY-swgs1597 | SRR1813473 | 2015 | 1  | North America | United States | Enteritidis | Enteritidis | 1425  | 36686 |
| SAL_BA1103AA | NY-swgs1596 | SRR1813472 | 2015 | 1  | North America | United States | Enteritidis | Enteritidis | 1425  | 36685 |
| SAL_BA1104AA | NY-swgs1595 | SRR1806280 | 2015 | 1  | North America | United States | Enteritidis | Enteritidis | 1425  | 36684 |
| SAL_BA1105AA | NY-swgs1594 | SRR1806279 | 2015 | 1  | North America | United States | Enteritidis | Enteritidis | 1425  | 36683 |
| SAL_BA1106AA | NY-swgs1593 | SRR1806278 | 2015 | 1  | North America | United States | Enteritidis | Enteritidis | 1425  | 36682 |
| SAL_BA1107AA | NY-swgs1592 | SRR1806277 | 2015 | 1  | North America | United States | Enteritidis | Enteritidis | 1425  | 36681 |
| SAL_BA1108AA | NY-swgs1591 | SRR1796045 | 2015 | 1  | North America | United States | Enteritidis | Enteritidis | 1425  | 36680 |
| SAL_BA1109AA | NY-swgs1590 | SRR1796044 | 2015 | 1  | North America | United States | Enteritidis | Enteritidis | 27924 | 36679 |
| SAL_BA1110AA | NY-swgs1589 | SRR1796043 | 2015 | 1  | North America | United States | Enteritidis | Enteritidis | 1425  | 36678 |
| SAL_BA1111AA | NY-swgs1588 | SRR1796042 | 2015 | 1  | North America | United States | Enteritidis | Enteritidis | 1425  | 36677 |
| SAL_BA1112AA | NY-swgs1587 | SRR1778062 | 2014 | 12 | North America | United States | Enteritidis | Enteritidis | 1425  | 36676 |
| SAL_BA1113AA | NY-swgs1586 | SRR1778060 | 2014 | 12 | North America | United States | Enteritidis | Enteritidis | 1425  | 36675 |
| SAL_BA1114AA | NY-swgs1585 | SRR1778054 | 2014 | 12 | North America | United States | Enteritidis | Enteritidis | 26849 | 36674 |
| SAL_BA1115AA | NY-swgs1584 | SRR1770487 | 2014 | 12 | North America | United States | Enteritidis | Enteritidis | 1425  | 36673 |
| SAL_BA1116AA | NY-swgs1583 | SRR1770486 | 2014 | 12 | North America | United States | Enteritidis | Enteritidis | 1425  | 21923 |
| SAL_BA1117AA | NY-swgs1582 | SRR1770485 | 2014 | 12 | North America | United States | Enteritidis | Enteritidis | 8003  | 36672 |
| SAL_BA1118AA | NY-swgs1581 | SRR1770484 | 2014 | 12 | North America | United States | Enteritidis | Enteritidis | 1425  | 36671 |
| SAL_BA1119AA | NY-swgs1580 | SRR1752283 | 2014 | 12 | North America | United States | Enteritidis | Enteritidis | 1425  | 36670 |
| SAL_BA1120AA | NY-swgs1579 | SRR1752282 | 2014 | 12 | North America | United States | Enteritidis | Enteritidis | 1425  | 36669 |
| SAL_BA1121AA | NY-swgs1578 | SRR1752281 | 2014 | 12 | North America | United States | Enteritidis | Enteritidis | 1425  | 36668 |
| SAL_BA1122AA | NY-swgs1577 | SRR1752112 | 2014 | 12 | North America | United States | Enteritidis | Enteritidis | 1425  | 36667 |
| SAL_BA1123AA | NY-swgs1576 | SRR1752111 | 2014 | 12 | North America | United States | Enteritidis | Enteritidis | 1425  | 36666 |
| SAL_BA1124AA | NY-swgs1575 | SRR1752110 | 2014 | 12 | North America | United States | Enteritidis | Enteritidis | 1425  | 36665 |
| SAL_BA1125AA | NY-swgs1574 | SRR1752109 | 2014 | 12 | North America | United States | Enteritidis | Enteritidis | 1425  | 36664 |
| SAL_BA1126AA | NY-swgs1573 | SRR1752108 | 2014 | 11 | North America | United States | Enteritidis | Enteritidis | 1425  | 36663 |
| SAL_BA1127AA | NY-swgs1572 | SRR1752107 | 2014 | 11 | North America | United States | Enteritidis | Enteritidis | 1425  | 36662 |
| SAL_BA1128AA | NY-swgs1571 | SRR1752106 | 2014 | 12 | North America | United States | Enteritidis | Enteritidis | 1425  | 36661 |
| SAL_BA1129AA | NY-swgs1570 | SRR1737751 | 2014 | 12 | North America | United States | Enteritidis | Enteritidis | 1425  | 36660 |
| SAL_BA1130AA | NY-swgs1569 | SRR1737750 | 2014 | 11 | North America | United States | Enteritidis | Enteritidis | 1425  | 36659 |
| SAL_BA1131AA | NY-swgs1568 | SRR1737749 | 2014 | 11 | North America | United States | Enteritidis | Enteritidis | 1425  | 21858 |
| SAL_BA1132AA | NY-swgs1567 | SRR1737748 | 2014 | 11 | North America | United States | Enteritidis | Enteritidis | 1425  | 36658 |
| SAL_BA1133AA | NY-swgs1566 | SRR1732683 | 2014 | 11 | North America | United States | Enteritidis | Enteritidis | 1425  | 36657 |
| SAL_BA1134AA | NY-swgs1565 | SRR1732682 | 2014 | 11 | North America | United States | Enteritidis | Enteritidis | 27929 | 36656 |
| SAL_BA1135AA | NY-swgs1564 | SRR1732681 | 2014 | 11 | North America | United States | Enteritidis | Enteritidis | 1425  | 21858 |
| SAL_BA1136AA | NY-swgs1563 | SRR1732680 | 2014 | 11 | North America | United States | Enteritidis | Enteritidis | 1425  | 36655 |
| SAL_BA1137AA | NY-swgs1562 | SRR1732679 | 2014 | 11 | North America | United States | Enteritidis | Enteritidis | 1425  | 21858 |
| SAL_BA1138AA | NY-swgs1561 | SRR1732678 | 2014 | 10 | North America | United States | Enteritidis | Enteritidis | 1425  | 36654 |
| SAL_BA1139AA | NY-swgs1560 | SRR1732677 | 2014 | 11 | North America | United States | Enteritidis | Enteritidis | 1425  | 21858 |
| SAL_BA1140AA | NY-swgs1559 | SRR1732676 | 2014 | 11 | North America | United States | Enteritidis | Enteritidis | 1425  | 36653 |
| SAL_BA1141AA | NY-swgs1558 | SRR1732675 | 2014 | 11 | North America | United States | Enteritidis | Enteritidis | 1425  | 36652 |
| SAL_BA1147AA | FDA00002138 | SRR2156630 | 2004 | 8  | North America | United States | Enteritidis | Enteritidis | 1425  | 36604 |
| SAL_BA1157AA | FDA00002137 | SRR2156618 | 2004 | 8  | North America | United States | Enteritidis | Enteritidis | 1425  | 36641 |



|              |                  |            |      |   |               |               |             |             |       |       |
|--------------|------------------|------------|------|---|---------------|---------------|-------------|-------------|-------|-------|
| SAL_BA1162AA | FDA00002140      | SRR2156609 | 2004 | 8 | North America | United States | Enteritidis | Enteritidis | 1425  | 36635 |
| SAL_BA1165AA | FDA00002133      | SRR2156604 | 2004 | 8 | North America | United States | Enteritidis | Enteritidis | 1425  | 36634 |
| SAL_BA1168AA | CFSAN032970      | SRR2156601 | 2012 |   | North America | United States | Enteritidis | Enteritidis | 1425  | 36631 |
| SAL_BA1178AA | CFSAN034232      | SRR2156578 | 2013 |   | North America | United States | Enteritidis | Enteritidis | 1425  | 36622 |
| SAL_BA1191AA | FDA00002141      | SRR2156517 | 2004 | 8 | North America | United States | Enteritidis | Enteritidis | 1425  | 36610 |
| SAL_BA1197AA | FDA00002139      | SRR2156507 | 2004 | 8 | North America | United States | Enteritidis | Enteritidis | 1425  | 36604 |
| SAL_BA1218AA | 15MN00308        | SRR2153476 | 2015 | 7 | North America | United States | Enteritidis | Enteritidis | 27901 | 36585 |
| SAL_BA1219AA | 15MN00305        | SRR2153475 | 2015 | 7 | North America | United States | Enteritidis | Enteritidis | 1425  | 36584 |
| SAL_BA1220AA | 15MN00306        | SRR2669599 | 2015 | 7 | North America | United States | Enteritidis | Enteritidis | 8003  | 36583 |
| SAL_BA1221AA | 15MN00307        | SRR2669600 | 2015 | 7 | North America | United States | Enteritidis | Enteritidis | 1425  | 36582 |
| SAL_BA1222AA | 15MN00303        | SRR2153466 | 2015 | 7 | North America | United States | Enteritidis | Enteritidis | 26832 | 36581 |
| SAL_BA1223AA | 15MN00304        | SRR2153465 | 2015 | 7 | North America | United States | Enteritidis | Enteritidis | 27904 | 36580 |
| SAL_BA1224AA | 15MN00302        | SRR2153464 | 2015 | 7 | North America | United States | Enteritidis | Enteritidis | 1425  | 36579 |
| SAL_BA1225AA | 15MN00300        | SRR2153463 | 2015 | 7 | North America | United States | Enteritidis | Enteritidis | 1425  | 36578 |
| SAL_BA1226AA | 15MN00371        | SRR2153212 | 2015 | 7 | North America | United States | Enteritidis | Enteritidis | 1425  | 11501 |
| SAL_BA1230AA | 15MN00380        | SRR2153208 | 2015 | 7 | North America | United States | Enteritidis | Enteritidis | 1425  | 36574 |
| SAL_BA1231AA | 15MN00373        | SRR2153207 | 2015 | 7 | North America | United States | Enteritidis | Enteritidis | 1425  | 12252 |
| SAL_BA1232AA | 15MN00372        | SRR2153206 | 2015 | 7 | North America | United States | Enteritidis | Enteritidis | 1425  | 8925  |
| SAL_BA1233AA | 15MN00370        | SRR2153205 | 2015 | 7 | North America | United States | Enteritidis | Enteritidis | 1425  | 8925  |
| SAL_BA1237AA | CFSAN035276      | SRR2153016 | 2012 |   | North America | United States | Enteritidis | Enteritidis | 1425  | 36571 |
| SAL_BA1247AA | CFSAN035272      | SRR2153005 | 2013 |   | North America | United States | Enteritidis | Enteritidis | 1425  | 36561 |
| SAL_BA1252AA | CFSAN035279      | SRR2153000 | 2013 |   | North America | United States | Enteritidis | Enteritidis | 26162 | 36557 |
| SAL_BA1289AA | FDA00002147      | SRR2143488 | 2004 | 8 | North America | United States | Enteritidis | Enteritidis | 1425  | 36497 |
| SAL_BA1295AA | FDA00002150      | SRR2143478 | 2004 | 8 | North America | United States | Enteritidis | Enteritidis | 1425  | 36528 |
| SAL_BA1307AA | FDA00002145      | SRR2143460 | 2004 | 8 | North America | United States | Enteritidis | Enteritidis | 1425  | 36503 |
| SAL_BA1308AA | FDA00002143      | SRR2143459 | 2004 | 8 | North America | United States | Enteritidis | Enteritidis | 1425  | 36496 |
| SAL_BA1313AA | FDA00002149      | SRR2143451 | 2004 | 8 | North America | United States | Enteritidis | Enteritidis | 1425  | 36514 |
| SAL_BA1326AA | FDA00002148      | SRR2143417 | 2004 | 8 | North America | United States | Enteritidis | Enteritidis | 1425  | 36504 |
| SAL_BA1327AA | FDA00002146      | SRR2143416 | 2004 | 8 | North America | United States | Enteritidis | Enteritidis | 1425  | 36503 |
| SAL_BA1333AA | FDA00002144      | SRR2143360 | 2004 | 8 | North America | United States | Enteritidis | Enteritidis | 1425  | 36497 |
| SAL_BA1334AA | FDA00002142      | SRR2143359 | 2004 | 8 | North America | United States | Enteritidis | Enteritidis | 1425  | 36496 |
| SAL_BA1336AA | 15MN00362        | SRR2140791 | 2015 | 6 | North America | United States | Enteritidis | Enteritidis | 1425  | 8925  |
| SAL_BA1337AA | 15MN00361        | SRR2140790 | 2015 | 6 | North America | United States | Enteritidis | Enteritidis | 1425  | 8925  |
| SAL_BA1338AA | 15MN00346        | SRR2140789 | 2015 | 7 | North America | United States | Enteritidis | Enteritidis | 26832 | 36494 |
| SAL_BA1339AA | 15MN00345        | SRR2140788 | 2015 | 7 | North America | United States | Enteritidis | Enteritidis | 27944 | 36493 |
| SAL_BA1340AA | 15MN00342        | SRR2140787 | 2015 | 7 | North America | United States | Enteritidis | Enteritidis | 1425  | 36492 |
| SAL_BA1341AA | 15MN00344        | SRR2140786 | 2015 | 7 | North America | United States | Enteritidis | Enteritidis | 1425  | 36488 |
| SAL_BA1344AA | 15MN00343        | SRR2140781 | 2015 | 7 | North America | United States | Enteritidis | Enteritidis | 1425  | 36489 |
| SAL_BA1345AA | 15MN00341        | SRR2140780 | 2015 | 7 | North America | United States | Enteritidis | Enteritidis | 1425  | 36488 |
| SAL_BA1346AA | 15MN00340        | SRR2140779 | 2015 | 7 | North America | United States | Enteritidis | Enteritidis | 1425  | 36487 |
| SAL_BA1406AA | WAPHL_SAL-A00917 | SRR2133398 | 2015 | 6 | North America | United States | Enteritidis | Enteritidis | 1425  | 6712  |
| SAL_BA1409AA | 15MN00320        | SRR2133351 | 2015 | 7 | North America | United States | Enteritidis | Enteritidis | 1425  | 36319 |
| SAL_BA1410AA | 15MN00260        | SRR2669605 | 2015 | 6 | North America | United States | Enteritidis | Enteritidis | 1425  | 36431 |
| SAL_BA1412AA | WAPHL_SAL-A00916 | SRR2133348 | 2015 | 6 | North America | United States | Enteritidis | Enteritidis | 1425  | 36438 |
| SAL_BA1417AA | 15MN00323        | SRR2133340 | 2015 | 7 | North America | United States | Enteritidis | Enteritidis | 1425  | 36433 |
| SAL_BA1418AA | WAPHL_SAL-A00911 | SRR2133339 | 2015 | 6 | North America | United States | Enteritidis | Enteritidis | 1425  | 36410 |
| SAL_BA1420AA | 15MN00256        | SRR2669604 | 2015 | 6 | North America | United States | Enteritidis | Enteritidis | 1425  | 36431 |
| SAL_BA1433AA | 15MN00329        | SRR2133212 | 2015 | 6 | North America | United States | Enteritidis | Enteritidis | 26832 | 35856 |
| SAL_BA1434AA | 15MN00328        | SRR2133211 | 2015 | 6 | North America | United States | Enteritidis | Enteritidis | 26832 | 35856 |
| SAL_BA1435AA | WAPHL_SAL-A00912 | SRR2133209 | 2015 | 6 | North America | United States | Enteritidis | Enteritidis | 1425  | 36410 |
| SAL_BA1436AA | 15MN00301        | SRR2133208 | 2015 | 7 | North America | United States | Enteritidis | Enteritidis | 1425  | 36421 |
| SAL_BA1441AA | WAPHL_SAL-A00915 | SRR2133195 | 2015 | 6 | North America | United States | Enteritidis | Enteritidis | 1425  | 6712  |
| SAL_BA1450AA | 15MN00321        | SRR2133171 | 2015 | 7 | North America | United States | Enteritidis | Enteritidis | 1425  | 23898 |
| SAL_BA1451AA | WAPHL_SAL-A00914 | SRR2133170 | 2015 | 6 | North America | United States | Enteritidis | Enteritidis | 1425  | 6712  |
| SAL_BA1453AA | WAPHL_SAL-A00913 | SRR2133163 | 2015 | 6 | North America | United States | Enteritidis | Enteritidis | 1425  | 36410 |
| SAL_BA1455AA | 15MN00241        | SRR2669598 | 2015 | 6 | North America | United States | Enteritidis | Enteritidis | 1425  | 8925  |
| SAL_BA1465AA | FSIS1503212      | SRR2132200 | 2014 |   | North America | United States | Enteritidis | Enteritidis | 1425  | 36402 |
| SAL_BA1495AA | FSIS1501004      | SRR2131787 | 2015 |   | North America | United States | Enteritidis | Enteritidis | 1425  | 36376 |
| SAL_BA1541AA | FSIS1501001      | SRR2126759 | 2015 |   | North America | United States | Enteritidis | Enteritidis | 1425  | 36336 |

|              |               |            |      |    |               |               |                         |             |       |       |
|--------------|---------------|------------|------|----|---------------|---------------|-------------------------|-------------|-------|-------|
| SAL_BA1544AA | FSIS1501000   | SRR2126731 | 2015 |    | North America | United States | Enteritidis             | Enteritidis | 1425  | 36333 |
| SAL_BA1547AA | FSIS1500998   | SRR2126722 | 2015 |    | North America | United States | Enteritidis             | Enteritidis | 1425  | 36330 |
| SAL_BA1553AA | FSIS1500980   | SRR2126291 | 2015 |    | North America | United States | Enteritidis             | Enteritidis | 1425  | 8406  |
| SAL_BA1555AA | FSIS1500982   | SRR2126289 | 2015 |    | North America | United States | Enteritidis             | Enteritidis | 1425  | 36323 |
| SAL_BA1559AA | 15MN00319     | SRR2125971 | 2015 | 7  | North America | United States | Enteritidis             | Enteritidis | 1425  | 36319 |
| SAL_BA1570AA | FSIS1501381   | SRR2125865 | 2015 |    | North America | United States | Enteritidis             | Enteritidis | 1425  | 36309 |
| SAL_BA1580AA | FSIS1500513   | SRR2125686 | 2014 |    | North America | United States | Enteritidis             | Enteritidis | 1425  | 36300 |
| SAL_BA1581AA | FSIS1500514   | SRR2125685 | 2014 |    | North America | United States | Enteritidis             | Enteritidis | 1425  | 36299 |
| SAL_BA1582AA | FSIS1500516   | SRR2125623 | 2014 |    | North America | United States | Enteritidis             | Enteritidis | 1425  | 36298 |
| SAL_BA1583AA | FSIS1500511   | SRR2125620 | 2014 |    | North America | United States | Enteritidis             | Enteritidis | 1425  | 36297 |
| SAL_BA1584AA | FSIS1500512   | SRR2125618 | 2014 |    | North America | United States | Enteritidis             | Enteritidis | 1425  | 36297 |
| SAL_BA1585AA | FSIS1500515   | SRR2125617 | 2014 |    | North America | United States | Enteritidis             | Enteritidis | 1425  | 36296 |
| SAL_BA1617AA | FDA00001398   | SRR2124539 | 2009 | 11 | Asia          | China         | Enteritidis             | Enteritidis | 1425  | 36275 |
| SAL_BA1619AA | CFSAN030066   | SRR2124535 | 2012 |    | North America | United States | Enteritidis             | Enteritidis | 1425  | 36273 |
| SAL_BA1644AA | 15MN00245     | SRR2088737 | 2015 | 6  | North America | United States | Enteritidis             | Enteritidis | 1425  | 36250 |
| SAL_BA1645AA | CFSAN032958   | SRR2124468 | 2012 |    | North America | United States | Enteritidis             | Enteritidis | 1425  | 36249 |
| SAL_BA1688AA | CFSAN030097   | SRR2124395 | 2012 |    | North America | United States | Enteritidis             | Enteritidis | 1425  | 36209 |
| SAL_BA1718AA | CFSAN030086   | SRR2124343 | 2012 |    | North America | United States | Enteritidis             | Enteritidis | 26162 | 36182 |
| SAL_BA1721AA | CFSAN030100   | SRR2124336 | 2012 |    | North America | United States | Enteritidis             | Enteritidis | 1425  | 36180 |
| SAL_BA1728AA | CFSAN030067   | SRR2124324 | 2012 |    | North America | United States | Enteritidis             | Enteritidis | 1425  | 36174 |
| SAL_BA1732AA | CFSAN030081   | SRR2124315 | 2012 |    | North America | United States | Enteritidis             | Enteritidis | 1425  | 22973 |
| SAL_BA1782AA | 15MN00286     | SRR2106118 | 2015 | 7  | North America | United States | Enteritidis             | Enteritidis | 1425  | 36130 |
| SAL_BA1783AA | 15MN00285     | SRR2106117 | 2015 | 7  | North America | United States | Enteritidis             | Enteritidis | 1425  | 36129 |
| SAL_BA1787AA | 15MN00288     | SRR2106113 | 2015 | 7  | North America | United States | Enteritidis             | Enteritidis | 1425  | 36126 |
| SAL_BA1788AA | 15MN00287     | SRR2106112 | 2015 | 7  | North America | United States | Enteritidis             | Enteritidis | 1425  | 36125 |
| SAL_BA1794AA | 15MN00268     | SRR2106106 | 2015 | 7  | North America | United States | Enteritidis             | Enteritidis | 1425  | 36119 |
| SAL_BA1807AA | 2015K-0492    | SRR2106066 |      |    | North America | United States | Enteritidis (Predicted) | Enteritidis | 26166 | 35888 |
| SAL_BA1841AA | FDA00001023   | SRR2104599 | 2007 | 2  | North America | United States | Tennessee               | Enteritidis | 1425  | 36086 |
| SAL_BA1894AA | 15MN00262     | SRR2102499 | 2015 | 6  | North America | United States | Enteritidis             | Enteritidis | 1425  | 8925  |
| SAL_BA1897AA | 15MN00255     | SRR2102494 | 2015 | 6  | North America | United States | Enteritidis             | Enteritidis | 26832 | 35856 |
| SAL_BA1913AA | 15MN00264     | SRR2102475 | 2015 | 6  | North America | United States | Enteritidis             | Enteritidis | 1425  | 36030 |
| SAL_BA1915AA | 15MN00266     | SRR2102471 | 2015 | 7  | North America | United States | Enteritidis             | Enteritidis | 1425  | 36028 |
| SAL_BA1937AA | 15MN00267     | SRR2102442 | 2015 | 7  | North America | United States | Enteritidis             | Enteritidis | 1425  | 36008 |
| SAL_BA1946AA | 15MN00263     | SRR2102433 | 2015 | 6  | North America | United States | Enteritidis             | Enteritidis | 1425  | 8925  |
| SAL_BA1948AA | 15MN00261     | SRR2102430 | 2015 | 6  | North America | United States | Enteritidis             | Enteritidis | 26832 | 36000 |
| SAL_BA1956AA | 15MN00265     | SRR2102420 | 2015 | 6  | North America | United States | Enteritidis             | Enteritidis | 1425  | 35993 |
| SAL_BA1970AA | 15MN00276     | SRR2102400 | 2015 | 7  | North America | United States | Enteritidis             | Enteritidis | 1425  | 35982 |
| SAL_BA1984AA | FSIS1502619   | SRR2102080 | 2015 |    | North America | United States | Enteritidis             | Enteritidis | 1425  | 35968 |
| SAL_BA1985AA | FSIS1502618   | SRR2102061 | 2015 |    | North America | United States | Enteritidis             | Enteritidis | 1425  | 35967 |
| SAL_BA1986AA | FSIS1502617   | SRR2102059 | 2015 |    | North America | United States | Enteritidis             | Enteritidis | 1425  | 35966 |
| SAL_BA1987AA | FSIS1502616   | SRR2102058 | 2015 |    | North America | United States | Enteritidis             | Enteritidis | 1425  | 35965 |
| SAL_BA2011AA | ADRD-14-11974 | SRR2096607 | 2014 | 6  | North America | United States | Enteritidis             | Enteritidis | 1425  | 35945 |
| SAL_BA2027AA | 15MN00243     | SRR2096593 | 2015 | 6  | North America | United States | Enteritidis             | Enteritidis | 1425  | 35931 |
| SAL_BA2047AA | 15MN00247     | SRR2096550 | 2015 | 6  | North America | United States | Enteritidis             | Enteritidis | 26832 | 35914 |
| SAL_BA2075AA | 2015K-0494    | SRR2095395 |      |    | North America | United States | Enteritidis (Predicted) | Enteritidis | 26166 | 35888 |
| SAL_BA2076AA | 2015K-0493    | SRR2095394 |      |    | North America | United States | Enteritidis (Predicted) | Enteritidis | 26166 | 35891 |
| SAL_BA2077AA | 2015K-0491    | SRR2095393 |      |    | North America | United States | Enteritidis (Predicted) | Enteritidis | 26166 | 35890 |
| SAL_BA2078AA | 2015K-0490    | SRR2095392 |      |    | North America | United States | Enteritidis (Predicted) | Enteritidis | 26166 | 35889 |
| SAL_BA2079AA | 2015K-0489    | SRR2095391 |      |    | North America | United States | Enteritidis (Predicted) | Enteritidis | 26166 | 35888 |
| SAL_BA2080AA | 2015K-0488    | SRR2095390 |      |    | North America | United States | Enteritidis (Predicted) | Enteritidis | 1425  | 35887 |
| SAL_BA2081AA | 2015K-0487    | SRR2095389 |      |    | North America | United States | Enteritidis (Predicted) | Enteritidis | 26166 | 35886 |
| SAL_BA2082AA | 2015K-0486    | SRR2095388 |      |    | North America | United States | Enteritidis (Predicted) | Enteritidis | 26166 | 35885 |
| SAL_BA2085AA | NY56857190    | SRR2094564 | 2015 | 6  | North America | United States | Enteritidis             | Enteritidis | 1425  | 35882 |
| SAL_BA2086AA | NY56857138    | SRR2094563 | 2015 | 6  | North America | United States | Enteritidis             | Enteritidis | 1425  | 35881 |
| SAL_BA2087AA | NY56857097    | SRR2094562 | 2015 | 6  | North America | United States | Enteritidis             | Enteritidis | 1425  | 35880 |
| SAL_BA2088AA | NY56761923    | SRR2094561 | 2015 | 6  | North America | United States | Enteritidis             | Enteritidis | 1425  | 35879 |
| SAL_BA2089AA | NY56761711    | SRR2094560 | 2015 | 6  | North America | United States | Enteritidis             | Enteritidis | 1425  | 35878 |
| SAL_BA2090AA | NY56761665    | SRR2094559 | 2015 | 6  | North America | United States | Enteritidis             | Enteritidis | 1425  | 35877 |
| SAL_BA2096AA | FSIS1501027   | SRR2093805 | 2015 |    | North America | United States | Enteritidis             | Enteritidis | 1425  | 35871 |

|              |               |            |      |    |                 |               |                         |             |       |       |
|--------------|---------------|------------|------|----|-----------------|---------------|-------------------------|-------------|-------|-------|
| SAL_BA2101AA | S14FP01642    | SRR2088897 | 2014 | 4  | Europe          | Belgium       | Enteritidis             | Enteritidis | 1425  | 35869 |
| SAL_BA2102AA | S14FP01640    | SRR2088896 | 2014 | 4  | Europe          | Belgium       | Enteritidis             | Enteritidis | 1425  | 35868 |
| SAL_BA2103AA | S14BD01753    | SRR2088895 | 2014 | 5  | Europe          | Belgium       | Enteritidis             | Enteritidis | 1425  | 35867 |
| SAL_BA2104AA | S14BD01672    | SRR2088894 | 2014 | 4  | Europe          | Belgium       | Enteritidis             | Enteritidis | 1425  | 35866 |
| SAL_BA2105AA | S14BD01605    | SRR2088893 | 2014 | 4  | Europe          | Belgium       | Enteritidis             | Enteritidis | 1425  | 35865 |
| SAL_BA2110AA | 15MN00242     | SRR2088736 | 2015 | 6  | North America   | United States | Enteritidis             | Enteritidis | 1425  | 35860 |
| SAL_BA2111AA | 15MN00239     | SRR2906162 | 2015 | 6  | North America   | United States | Enteritidis             | Enteritidis | 1425  | 35859 |
| SAL_BA2112AA | 15MN00240     | SRR2088733 | 2015 | 6  | North America   | United States | Enteritidis             | Enteritidis | 1425  | 35858 |
| SAL_BA2113AA | 15MN00259     | SRR2088731 | 2015 | 6  | North America   | United States | Enteritidis             | Enteritidis | 1425  | 35855 |
| SAL_BA2114AA | 15MN00254     | SRR2088730 | 2015 | 6  | North America   | United States | Enteritidis             | Enteritidis | 26832 | 35857 |
| SAL_BA2115AA | 15MN00253     | SRR2088729 | 2015 | 6  | North America   | United States | Enteritidis             | Enteritidis | 26832 | 35856 |
| SAL_BA2116AA | 15MN00252     | SRR2088728 | 2015 | 6  | North America   | United States | Enteritidis             | Enteritidis | 1425  | 35855 |
| SAL_BA2117AA | 15MN00251     | SRR2088727 | 2015 | 6  | North America   | United States | Enteritidis             | Enteritidis | 26832 | 35854 |
| SAL_BA2118AA | 15MN00244     | SRR2088726 | 2015 | 6  | North America   | United States | Enteritidis             | Enteritidis | 1425  | 35853 |
| SAL_BA2119AA | 15MN00238     | SRR2088725 | 2015 | 6  | North America   | United States | Enteritidis             | Enteritidis | 27944 | 35852 |
| SAL_BA2120AA | 15MN00257     | SRR2088724 | 2015 | 6  | North America   | United States | Enteritidis             | Enteritidis | 1425  | 35851 |
| SAL_BA2166AA | CFSAN034151   | SRR2086995 | 2013 |    | North America   | United States | Enteritidis             | Enteritidis | 1425  | 35812 |
| SAL_BA2167AA | CFSAN034136   | SRR2086994 | 2012 |    | North America   | United States | Enteritidis             | Enteritidis | 1425  | 35811 |
| SAL_BA2168AA | CFSAN034135   | SRR2086993 | 2012 |    | North America   | United States | Enteritidis             | Enteritidis | 1425  | 35810 |
| SAL_BA2173AA | CFSAN034140   | SRR2086988 | 2012 |    | North America   | United States | Enteritidis             | Enteritidis | 28569 | 35807 |
| SAL_BA2192AA | CFSAN034133   | SRR2086968 | 2012 | 11 | 5 North America | United States | Enteritidis             | Enteritidis | 1425  | 35789 |
| SAL_BA2212AA | FDA00001199   | SRR2086597 | 2008 | 2  | Asia            | Sri Lanka     | Enteritidis             | Enteritidis | 1425  | 35775 |
| SAL_BA2231AA | FDA00001212   | SRR2086576 | 2008 | 3  | Asia            | India         | Enteritidis             | Enteritidis | 1425  | 35760 |
| SAL_BA2250AA | FDA00004465   | SRR2086559 | 2008 | 2  | Asia            | China         | Enteritidis             | Enteritidis | 1425  | 35744 |
| SAL_BA2304AA | NY56657591    | SRR2085497 | 2015 | 6  | North America   | United States | Enteritidis             | Enteritidis | 1425  | 35692 |
| SAL_BA2306AA | NY56657578    | SRR2085496 | 2015 | 6  | North America   | United States | Enteritidis             | Enteritidis | 1425  | 35690 |
| SAL_BA2308AA | NY56657565    | SRR2085495 | 2015 | 6  | North America   | United States | Enteritidis             | Enteritidis | 1425  | 35688 |
| SAL_BA2310AA | NY56657552    | SRR2085494 | 2015 | 6  | North America   | United States | Enteritidis             | Enteritidis | 1425  | 10156 |
| SAL_BA2312AA | NY56582447    | SRR2085493 | 2015 | 6  | North America   | United States | Enteritidis             | Enteritidis | 1425  | 35685 |
| SAL_BA2314AA | NY56582209    | SRR2085492 | 2015 | 6  | North America   | United States | Enteritidis             | Enteritidis | 1425  | 35683 |
| SAL_BA2316AA | NY56581629    | SRR2085491 | 2015 | 6  | North America   | United States | Enteritidis             | Enteritidis | 1425  | 35681 |
| SAL_BA2318AA | NY56581512    | SRR2085490 | 2015 | 5  | North America   | United States | Enteritidis             | Enteritidis | 1425  | 35679 |
| SAL_BA2321AA | NY56581488    | SRR2085489 | 2015 | 5  | North America   | United States | Enteritidis             | Enteritidis | 1425  | 35676 |
| SAL_BA2322AA | NY56581414    | SRR2085488 | 2015 | 6  | North America   | United States | Enteritidis             | Enteritidis | 1425  | 35675 |
| SAL_BA2331AA | 2015K-0436    | SRR2082996 |      |    | North America   | United States | Enteritidis (Predicted) | Enteritidis | 1425  | 33607 |
| SAL_BA2333AA | 2015K-0435    | SRR2082995 | 2015 | 3  | North America   | United States | Enteritidis             | Enteritidis | 1425  | 6087  |
| SAL_BA2336AA | 2015K-0434    | SRR2082994 | 2015 | 3  | North America   | United States | Enteritidis             | Enteritidis | 1425  | 35665 |
| SAL_BA2338AA | 2015K-0433    | SRR2082992 |      |    | North America   | United States | Enteritidis (Predicted) | Enteritidis | 1425  | 35663 |
| SAL_BA2381AA | 15MN00234     | SRR2082947 | 2015 | 6  | North America   | United States | Enteritidis             | Enteritidis | 1425  | 12244 |
| SAL_BA2387AA | 15MN00232     | SRR2082940 | 2015 | 6  | North America   | United States | Enteritidis             | Enteritidis | 1425  | 35633 |
| SAL_BA2392AA | 15MN00229     | SRR3662621 | 2015 | 6  | North America   | United States | Enteritidis             | Enteritidis | 1425  | 35629 |
| SAL_BA2405AA | AZ_TG68272    | SRR2082859 | 2010 |    | North America   | United States | Enteritidis             | Enteritidis | 1425  | 35616 |
| SAL_BA2413AA | 15MN00233     | SRR2082853 | 2015 | 6  | North America   | United States | Enteritidis             | Enteritidis | 1425  | 12244 |
| SAL_BA2421AA | 15MN00228     | SRR3662622 | 2015 | 6  | North America   | United States | Enteritidis             | Enteritidis | 1425  | 35602 |
| SAL_BA2437AA | 15MN00237     | SRR2082830 | 2015 | 6  | North America   | United States | Enteritidis             | Enteritidis | 1425  | 35589 |
| SAL_BA2497AA | 3302/3        | ERR349624  |      |    |                 |               | Typhi                   | Enteritidis | 3776  | 35552 |
| SAL_BA2513AA | CFSAN034131   | SRR2078917 | 2012 | 11 | 5 North America | United States | Enteritidis             | Enteritidis | 28569 | 35543 |
| SAL_BA2538AA | NY56425384    | SRR2078828 | 2015 | 5  | North America   | United States | Enteritidis             | Enteritidis | 1425  | 35524 |
| SAL_BA2540AA | NY56423955    | SRR2078827 | 2015 | 5  | North America   | United States | Enteritidis             | Enteritidis | 1425  | 35522 |
| SAL_BA2542AA | NY56423922    | SRR2078826 | 2015 | 5  | North America   | United States | Enteritidis             | Enteritidis | 1425  | 35520 |
| SAL_BA2544AA | NY56423894    | SRR2078825 | 2015 | 5  | North America   | United States | Enteritidis             | Enteritidis | 1425  | 35518 |
| SAL_BA2583AA | 3540/3        | ERR349438  |      |    |                 |               | Typhi                   | Enteritidis | 3776  | 33191 |
| SAL_BA2607AA | ADRD1-14-8130 | SRR2077391 | 2014 | 4  | North America   | United States | Enteritidis             | Enteritidis | 1425  | 12238 |
| SAL_BA2717AA | CFSAN032967   | SRR2075298 | 2012 |    | North America   | United States | Enteritidis             | Enteritidis | 1425  | 35370 |
| SAL_BA2819AA | CFSAN032968   | SRR2075104 | 2012 |    | North America   | United States | Enteritidis             | Enteritidis | 1425  | 35287 |
| SAL_BA2879AA | CFSAN032959   | SRR2075048 | 2012 |    | North America   | United States | Enteritidis             | Enteritidis | 1425  | 35240 |
| SAL_BA2910AA | CFSAN032964   | SRR2075011 | 2012 |    | North America   | United States | Enteritidis             | Enteritidis | 1425  | 35213 |
| SAL_BA2916AA | CFSAN033541   | SRR2075005 | 2013 |    | North America   | United States | Enteritidis             | Enteritidis | 1425  | 35207 |
| SAL_BA2923AA | CFSAN033543   | SRR2074998 | 2012 |    | North America   | United States | Enteritidis             | Enteritidis | 1425  | 35200 |

|              |                 |            |      |    |               |               |                         |             |       |       |
|--------------|-----------------|------------|------|----|---------------|---------------|-------------------------|-------------|-------|-------|
| SAL_BA2951AA | NY56360928      | SRR2072702 | 2015 | 5  | North America | United States | Enteritidis             | Enteritidis | 1425  | 35180 |
| SAL_BA2953AA | NY56360838      | SRR2072700 | 2015 | 5  | North America | United States | Enteritidis             | Enteritidis | 1425  | 35179 |
| SAL_BA2955AA | NY56360751      | SRR2072698 | 2015 | 5  | North America | United States | Enteritidis             | Enteritidis | 1425  | 35178 |
| SAL_BA2957AA | NY56316315      | SRR2072696 | 2015 | 4  | North America | United States | Enteritidis             | Enteritidis | 1425  | 35177 |
| SAL_BA2958AA | NY56300061      | SRR2072695 | 2015 | 5  | North America | United States | Enteritidis             | Enteritidis | 1425  | 35176 |
| SAL_BA2960AA | NY56299973      | SRR2072694 | 2015 | 5  | North America | United States | Enteritidis             | Enteritidis | 1425  | 35175 |
| SAL_BA2963AA | NY56299887      | SRR2072692 | 2015 | 5  | North America | United States | Enteritidis             | Enteritidis | 1425  | 35174 |
| SAL_BA2965AA | NY56299851      | SRR2072691 | 2015 | 5  | North America | United States | Enteritidis             | Enteritidis | 1425  | 35173 |
| SAL_BA2967AA | NY56299818      | SRR2072689 | 2015 | 5  | North America | United States | Enteritidis             | Enteritidis | 1425  | 35172 |
| SAL_BA2968AA | NY56296697      | SRR2072687 | 2015 | 5  | North America | United States | Enteritidis             | Enteritidis | 1425  | 35171 |
| SAL_BA2970AA | 15MN00226       | SRR2072493 | 2015 | 6  | North America | United States | Enteritidis             | Enteritidis | 1425  | 34519 |
| SAL_BA2972AA | 15MN00224       | SRR2072492 | 2015 | 6  | North America | United States | Enteritidis             | Enteritidis | 8003  | 35169 |
| SAL_BA2974AA | 15MN00223       | SRR2072491 | 2015 | 6  | North America | United States | Enteritidis             | Enteritidis | 1425  | 8925  |
| SAL_BA2976AA | 15MN00222       | SRR2072490 | 2015 | 6  | North America | United States | Enteritidis             | Enteritidis | 1425  | 35166 |
| SAL_BA2981AA | 15MN00227       | SRR2072485 | 2015 | 6  | North America | United States | Enteritidis             | Enteritidis | 8003  | 35161 |
| SAL_BA2982AA | 15MN00225       | SRR2072484 | 2015 | 6  | North America | United States | Enteritidis             | Enteritidis | 1425  | 35160 |
| SAL_BA2984AA | 15MN00221       | SRR2072483 | 2015 | 6  | North America | United States | Enteritidis             | Enteritidis | 1425  | 35158 |
| SAL_BA3004AA | NY_FSL S10-1644 | SRR1002831 | 2011 | 10 | North America | United States | Enteritidis             | Enteritidis | 7801  | 35137 |
| SAL_BA3017AA | NY_FSL S10-1623 | SRR1002825 | 2011 | 9  | North America | United States | Enteritidis             | Enteritidis | 7801  | 35137 |
| SAL_BA3028AA | NY-N14325       | SRR2070984 | 2007 |    | North America | United States | Enteritidis             | Enteritidis | 1425  | 35129 |
| SAL_BA3062AA | NY56300870      | SRR2070870 |      |    | North America | United States | Enteritidis             | Enteritidis | 1425  | 35098 |
| SAL_BA3064AA | NY56300851      | SRR2070869 |      |    | North America | United States | Enteritidis             | Enteritidis | 1425  | 35098 |
| SAL_BA3066AA | NY56300821      | SRR2070868 |      |    | North America | United States | Enteritidis             | Enteritidis | 1425  | 35098 |
| SAL_BA3072AA | PNUSAS000413    | SRR2192239 |      |    | North America | United States | Enteritidis (Predicted) | Enteritidis | 1425  | 35093 |
| SAL_BA3074AA | PNUSAS000412    | SRR2192237 |      |    | North America | United States | Enteritidis (Predicted) | Enteritidis | 1425  | 35091 |
| SAL_BA3076AA | PNUSAS000411    | SRR2192194 |      |    | North America | United States | Enteritidis (Predicted) | Enteritidis | 1425  | 35089 |
| SAL_BA3078AA | PNUSAS000459    | SRR2194018 | 2015 | 4  | North America | United States | Enteritidis             | Enteritidis | 1425  | 35087 |
| SAL_BA3105AA | FSIS1501015     | SRR2068054 | 2015 |    | North America | United States | Enteritidis             | Enteritidis | 1425  | 35060 |
| SAL_BA3111AA | FSIS1501012     | SRR2067988 | 2015 |    | North America | United States | Enteritidis             | Enteritidis | 1425  | 35054 |
| SAL_BA3122AA | NY56250649      | SRR2067480 | 2015 | 5  | North America | United States | Enteritidis             | Enteritidis | 1425  | 35044 |
| SAL_BA3124AA | NY56250681      | SRR2067479 | 2015 | 5  | North America | United States | Enteritidis             | Enteritidis | 1425  | 35042 |
| SAL_BA3126AA | NY56250668      | SRR2067477 | 2015 | 5  | North America | United States | Enteritidis             | Enteritidis | 1425  | 35040 |
| SAL_BA3128AA | NY56250636      | SRR2067476 | 2015 | 5  | North America | United States | Enteritidis             | Enteritidis | 1425  | 35038 |
| SAL_BA3130AA | NY56207015      | SRR2067262 | 2015 | 5  | North America | United States | Enteritidis             | Enteritidis | 1425  | 2668  |
| SAL_BA3132AA | NY56207004      | SRR2066774 | 2015 | 5  | North America | United States | Enteritidis             | Enteritidis | 1425  | 35035 |
| SAL_BA3134AA | NY56205726      | SRR2066432 | 2015 | 5  | North America | United States | Enteritidis             | Enteritidis | 1425  | 35033 |
| SAL_BA3136AA | NY56161314      | SRR2065999 | 2015 | 5  | North America | United States | Enteritidis             | Enteritidis | 1425  | 35032 |
| SAL_BA3138AA | NY56250603      | SRR2064145 | 2015 | 5  | North America | United States | Enteritidis             | Enteritidis | 1425  | 35028 |
| SAL_BA3140AA | NY56250590      | SRR2064144 | 2015 | 5  | North America | United States | Enteritidis             | Enteritidis | 1425  | 2668  |
| SAL_BA3142AA | NY56250555      | SRR2064143 | 2015 | 5  | North America | United States | Enteritidis             | Enteritidis | 1425  | 35027 |
| SAL_BA3144AA | NY56206993      | SRR2064142 | 2015 | 4  | North America | United States | Enteritidis             | Enteritidis | 1425  | 35024 |
| SAL_BA3146AA | NY56206572      | SRR2064141 | 2015 | 5  | North America | United States | Enteritidis             | Enteritidis | 28574 | 35022 |
| SAL_BA3148AA | NY56205781      | SRR2064140 | 2015 | 5  | North America | United States | Enteritidis             | Enteritidis | 1425  | 35020 |
| SAL_BA3150AA | NY56205739      | SRR2064139 | 2015 | 5  | North America | United States | Enteritidis             | Enteritidis | 1425  | 10271 |
| SAL_BA3152AA | NY56161301      | SRR2064136 | 2015 | 5  | North America | United States | Enteritidis             | Enteritidis | 1425  | 35017 |
| SAL_BA3154AA | NY56250709      | SRR2064129 | 2015 | 5  | North America | United States | Enteritidis             | Enteritidis | 1425  | 35016 |
| SAL_BA3166AA | NY56250694      | SRR2064123 | 2015 | 5  | North America | United States | Enteritidis             | Enteritidis | 1425  | 35004 |
| SAL_BA3170AA | NY56161285      | SRR2064121 | 2015 | 5  | North America | United States | Enteritidis             | Enteritidis | 1425  | 35001 |
| SAL_BA3180AA | NY56161250      | SRR2064115 | 2015 | 5  | North America | United States | Enteritidis             | Enteritidis | 1425  | 34991 |
| SAL_BA3186AA | 15MN00210       | SRR2062507 | 2015 | 6  | North America | United States | Enteritidis             | Enteritidis | 1425  | 11501 |
| SAL_BA3188AA | 15MN00209       | SRR2062506 | 2015 | 6  | North America | United States | Enteritidis             | Enteritidis | 1425  | 8925  |
| SAL_BA3190AA | 15MN00213       | SRR2062505 | 2015 | 6  | North America | United States | Enteritidis             | Enteritidis | 1425  | 34983 |
| SAL_BA3192AA | 15MN00212       | SRR2062504 | 2015 | 6  | North America | United States | Enteritidis             | Enteritidis | 1425  | 34981 |
| SAL_BA3194AA | 15MN00211       | SRR2062503 | 2015 | 6  | North America | United States | Enteritidis             | Enteritidis | 1425  | 34979 |
| SAL_BA3196AA | 15MN00208       | SRR2062502 | 2015 | 5  | North America | United States | Enteritidis             | Enteritidis | 1425  | 34977 |
| SAL_BA3215AA | PNUSAS000453    | SRR2193691 |      |    | North America | United States | Enteritidis (Predicted) | Enteritidis | 1425  | 34959 |
| SAL_BA3217AA | PNUSAS000452    | SRR2193690 |      |    | North America | United States | Enteritidis (Predicted) | Enteritidis | 1425  | 34957 |
| SAL_BA3220AA | PNUSAS000451    | SRR2193689 |      |    | North America | United States | Enteritidis (Predicted) | Enteritidis | 1425  | 34954 |
| SAL_BA3222AA | PNUSAS000450    | SRR2193688 |      |    | North America | United States | Enteritidis (Predicted) | Enteritidis | 1425  | 34952 |

|              |                                      |            |      |   |               |               |                         |             |       |       |
|--------------|--------------------------------------|------------|------|---|---------------|---------------|-------------------------|-------------|-------|-------|
| SAL_BA3224AA | PNUSAS000449                         | SRR2058220 |      |   | North America | United States | Enteritidis (Predicted) | Enteritidis | 1425  | 34950 |
| SAL_BA3241AA | 2010K_0600-sc-2013-04-23TERR341114   |            |      |   |               |               | Typhimurium             | Enteritidis | 1424  | 34939 |
| SAL_BA3253AA | 2010K_0610-sc-2013-04-23TERR341102   |            |      |   |               |               | Enteritidis             | Enteritidis | 1424  | 34914 |
| SAL_BA3254AA | 2010K_0618-sc-2013-04-23TERR341101   |            |      |   |               |               | Enteritidis             | Enteritidis | 1424  | 41278 |
| SAL_BA3256AA | 2010K_0549-sc-2013-04-23TERR341099   |            |      |   |               |               | Enteritidis             | Enteritidis | 1424  | 41277 |
| SAL_BA3257AA | 2010K_0465-sc-2013-04-23TERR341098   |            |      |   |               |               | Enteritidis             | Enteritidis | 40441 | 41276 |
| SAL_BA3285AA | 2010K_0577-sc-2013-04-23TERR341069   |            |      |   |               |               | Typhimurium             | Enteritidis | 1424  | 34914 |
| SAL_BA3432AA | 2015K-0316                           | SRR2578266 | 2015 | 2 | North America | United States | Enteritidis             | Enteritidis | 1425  | 2067  |
| SAL_BA3433AA | 2015K-0315                           | SRR2578267 | 2015 | 3 | North America | United States | Enteritidis             | Enteritidis | 1425  | 25638 |
| SAL_BA3434AA | 2015K-0313                           | SRR2578270 | 2015 | 3 | North America | United States | Enteritidis             | Enteritidis | 1425  | 2067  |
| SAL_BA3443AA | 15MNO0206                            | SRR2056006 | 2015 | 5 | North America | United States | Enteritidis             | Enteritidis | 1425  | 11501 |
| SAL_BA3444AA | 15MNO0204                            | SRR2056005 | 2015 | 5 | North America | United States | Enteritidis             | Enteritidis | 1425  | 34803 |
| SAL_BA3445AA | 15MNO0198                            | SRR2056004 | 2015 | 5 | North America | United States | Enteritidis             | Enteritidis | 1425  | 11501 |
| SAL_BA3446AA | 15MNO0197                            | SRR2056003 | 2015 | 5 | North America | United States | Enteritidis             | Enteritidis | 1425  | 34170 |
| SAL_BA3447AA | 15MNO0207                            | SRR2056002 | 2015 | 5 | North America | United States | Enteritidis             | Enteritidis | 1425  | 34802 |
| SAL_BA3448AA | 15MNO0205                            | SRR2056001 | 2015 | 5 | North America | United States | Enteritidis             | Enteritidis | 1425  | 34801 |
| SAL_BA3449AA | 15MNO0203                            | SRR2056000 | 2015 | 5 | North America | United States | Enteritidis             | Enteritidis | 1425  | 34799 |
| SAL_BA3451AA | NY-N14221                            | SRR2054615 | 2007 |   | North America | United States | Enteritidis             | Enteritidis | 1425  | 34798 |
| SAL_BA3452AA | NY-N14220                            | SRR2054614 | 2007 |   | North America | United States | Enteritidis             | Enteritidis | 1425  | 34797 |
| SAL_BA3479AA | 15MNO0172                            | SRR2054262 | 2015 | 5 | North America | United States | Enteritidis             | Enteritidis | 1425  | 34520 |
| SAL_BA3483AA | 15MNO0175                            | SRR2054257 | 2015 | 5 | North America | United States | Enteritidis             | Enteritidis | 1425  | 34774 |
| SAL_BA3512AA | 15MNO0176                            | SRR2054221 | 2015 | 5 | North America | United States | Enteritidis             | Enteritidis | 1425  | 34753 |
| SAL_BA3513AA | 15MNO0174                            | SRR2054220 | 2015 | 4 | North America | United States | Enteritidis             | Enteritidis | 1425  | 34752 |
| SAL_BA3571AA | 15MNO0173                            | SRR2054137 | 2015 | 5 | North America | United States | Enteritidis             | Enteritidis | 1425  | 34704 |
| SAL_BA3679AA | 2015K-0363                           | SRR2571583 |      |   | North America | United States | Enteritidis (Predicted) | Enteritidis | 1425  | 34621 |
| SAL_BA3681AA | 2015K-0361                           | SRR2571585 |      |   | North America | United States | Enteritidis (Predicted) | Enteritidis | 1425  | 4169  |
| SAL_BA3683AA | 2015K-0362                           | SRR2571582 | 2015 | 4 | North America | United States | Enteritidis             | Enteritidis | 1425  | 4169  |
| SAL_BA3685AA | 2015K-0360                           | SRR2571581 | 2015 | 4 | North America | United States | Enteritidis             | Enteritidis | 1425  | 4169  |
| SAL_BA3687AA | 2015K-0359                           | SRR2571586 | 2015 | 4 | North America | United States | Enteritidis             | Enteritidis | 1425  | 4169  |
| SAL_BA3689AA | 2015K-0357                           | SRR2571587 | 2015 | 5 | North America | United States | Enteritidis             | Enteritidis | 1425  | 4169  |
| SAL_BA3691AA | 2015K-0358                           | SRR2571584 | 2015 | 4 | North America | United States | Enteritidis             | Enteritidis | 1425  | 4169  |
| SAL_BA3700AA | 2015K-0334                           | SRR2577440 |      |   | North America | United States | Enteritidis (Predicted) | Enteritidis | 26543 | 34607 |
| SAL_BA3702AA | 2015K-0333                           | SRR2577308 |      |   | North America | United States | Enteritidis (Predicted) | Enteritidis | 26543 | 34605 |
| SAL_BA3703AA | 2015K-0332                           | SRR2577307 |      |   | North America | United States | Enteritidis (Predicted) | Enteritidis | 26543 | 34604 |
| SAL_BA3709AA | 2015K-0314                           | SRR2051445 |      |   | North America | United States | Enteritidis (Predicted) | Enteritidis | 1425  | 34600 |
| SAL_BA3712AA | 2015K-0307                           | SRR2051443 |      |   | North America | United States | Enteritidis (Predicted) | Enteritidis | 1425  | 25745 |
| SAL_BA3781AA | 672456-sc-2013-04-16T07:3:ERR338971  |            |      |   |               |               | Enteritidis             | Enteritidis | 1425  | 41294 |
| SAL_BA3783AA | 649762-sc-2013-04-16T07:3:ERR338970  |            |      |   |               |               | Enteritidis             | Enteritidis | 1425  | 41293 |
| SAL_BA3787AA | 645902-sc-2013-04-16T07:3:ERR338968  |            |      |   |               |               | Enteritidis             | Enteritidis | 3888  | 41292 |
| SAL_BA3789AA | 645899-sc-2013-04-16T07:3:ERR338967  |            |      |   |               |               | Enteritidis             | Enteritidis | 3888  | 41292 |
| SAL_BA3794AA | 672461-sc-2013-04-16T07:3:ERR338965  |            |      |   |               |               | Enteritidis             | Enteritidis | 3888  | 41036 |
| SAL_BA3796AA | 658910-sc-2013-04-16T07:3:ERR338964  |            |      |   |               |               | Enteritidis             | Enteritidis | 3888  | 41291 |
| SAL_BA3804AA | 651579-sc-2013-04-16T07:3:ERR338960  |            |      |   |               |               | Enteritidis             | Enteritidis | 1425  | 41290 |
| SAL_BA3808AA | 672246-sc-2013-04-16T07:3:ERR338958  |            |      |   |               |               | Enteritidis             | Enteritidis | 3888  | 41036 |
| SAL_BA3810AA | 655136-sc-2013-04-16T07:3:ERR338957  |            |      |   |               |               | Enteritidis             | Enteritidis | 3888  | 41443 |
| SAL_BA3812AA | 649763-sc-2013-04-16T07:3:ERR338956  |            |      |   |               |               | Enteritidis             | Enteritidis | 1425  | 34533 |
| SAL_BA3813AA | 682965-sc-2013-04-16T07:3:ERR338955  |            |      |   |               |               | Enteritidis             | Enteritidis | 3888  | 34531 |
| SAL_BA3828AA | 383167-sc-2013-04-16T07:3:ERR338948  |            |      |   |               |               | Enteritidis             | Enteritidis | 1425  | 34419 |
| SAL_BA3832AA | 333519-sc-2013-04-16T07:3:ERR338946  |            |      |   |               |               | Enteritidis             | Enteritidis | 1425  | 41427 |
| SAL_BA3836AA | 466244-sc-2013-04-16T07:3:ERR338944  |            |      |   |               |               | Enteritidis             | Enteritidis | 1425  | 41426 |
| SAL_BA3838AA | 1025081-sc-2013-04-16T07:3:ERR338943 |            |      |   |               |               | Enteritidis             | Enteritidis | 3815  | 34524 |
| SAL_BA3840AA | 384986-sc-2013-04-16T07:3:ERR338942  |            |      |   |               |               | Enteritidis             | Enteritidis | 1425  | 34419 |
| SAL_BA3844AA | 1025080-sc-2013-04-16T07:3:ERR338940 |            |      |   |               |               | Enteritidis             | Enteritidis | 3815  | 41314 |
| SAL_BA3846AA | 348816-sc-2013-04-16T07:3:ERR338939  |            |      |   |               |               | Enteritidis             | Enteritidis | 1425  | 34404 |
| SAL_BA3848AA | 249299-sc-2013-04-16T07:3:ERR338938  |            |      |   |               |               | Enteritidis             | Enteritidis | 1425  | 34412 |
| SAL_BA3851AA | 236888-sc-2013-04-16T07:3:ERR338937  |            |      |   |               |               | Enteritidis             | Enteritidis | 1425  | 41313 |
| SAL_BA3853AA | 171403-sc-2013-04-16T07:3:ERR338936  |            |      |   |               |               | Enteritidis             | Enteritidis | 1425  | 41312 |
| SAL_BA3854AA | 15MNO0171                            | SRR2047362 | 2015 | 5 | North America | United States | Enteritidis             | Enteritidis | 1425  | 34520 |
| SAL_BA3856AA | 15MNO0170                            | SRR2047361 | 2015 | 5 | North America | United States | Enteritidis             | Enteritidis | 1425  | 34519 |

|              |                                     |            |      |   |               |               |                         |             |       |       |
|--------------|-------------------------------------|------------|------|---|---------------|---------------|-------------------------|-------------|-------|-------|
| SAL_BA3857AA | 238577-sc-2013-04-16T07:3:ERR338934 |            |      |   |               |               | Enteritidis             | Enteritidis | 1425  | 34393 |
| SAL_BA3858AA | 15MN00169                           | SRR2047360 | 2015 | 5 | North America | United States | Enteritidis             | Enteritidis | 27901 | 34518 |
| SAL_BA3859AA | 15MN00165                           | SRR2047359 | 2015 | 5 | North America | United States | Enteritidis             | Enteritidis | 1425  | 2323  |
| SAL_BA3861AA | 318064-sc-2013-04-16T07:3:ERR338932 |            |      |   |               |               | Enteritidis             | Enteritidis | 1425  | 41311 |
| SAL_BA3862AA | 15MN00164                           | SRR2047358 | 2015 | 5 | North America | United States | Enteritidis             | Enteritidis | 1425  | 34517 |
| SAL_BA3864AA | 15MN00163                           | SRR2047357 | 2015 | 5 | North America | United States | Enteritidis             | Enteritidis | 1425  | 34516 |
| SAL_BA3865AA | 586365-sc-2013-04-16T07:3:ERR338930 |            |      |   |               |               | Enteritidis             | Enteritidis | 1425  | 41310 |
| SAL_BA3873AA | 201566-sc-2013-04-16T07:3:ERR338926 |            |      |   |               |               | Enteritidis             | Enteritidis | 1425  | 41309 |
| SAL_BA3881AA | 596719-sc-2013-04-16T07:3:ERR338922 |            |      |   |               |               | Enteritidis             | Enteritidis | 1425  | 34512 |
| SAL_BA3883AA | 575404-sc-2013-04-16T07:3:ERR338921 |            |      |   |               |               | Enteritidis             | Enteritidis | 1425  | 34500 |
| SAL_BA3885AA | 177883-sc-2013-04-16T07:3:ERR338920 |            |      |   |               |               | Enteritidis             | Enteritidis | 1425  | 34510 |
| SAL_BA3887AA | 360688-sc-2013-04-16T07:3:ERR338919 |            |      |   |               |               | Enteritidis             | Enteritidis | 1425  | 34399 |
| SAL_BA3894AA | 511112-sc-2013-04-16T07:3:ERR338916 |            |      |   |               |               | Enteritidis             | Enteritidis | 3888  | 41308 |
| SAL_BA3896AA | 512103-sc-2013-04-16T07:3:ERR338915 |            |      |   |               |               | Enteritidis             | Enteritidis | 3888  | 34369 |
| SAL_BA3901AA | 238661-sc-2013-04-16T07:3:ERR338912 |            |      |   |               |               | Enteritidis             | Enteritidis | 1425  | 34354 |
| SAL_BA3905AA | 462913-sc-2013-04-16T07:3:ERR338910 |            |      |   |               |               | Enteritidis             | Enteritidis | 1425  | 41307 |
| SAL_BA3908AA | 236885-sc-2013-04-16T07:3:ERR338908 |            |      |   |               |               | Enteritidis             | Enteritidis | 1425  | 41306 |
| SAL_BA3914AA | 463134-sc-2013-04-16T07:3:ERR338905 |            |      |   |               |               | Enteritidis             | Enteritidis | 1425  | 34500 |
| SAL_BA3931AA | CFSAN032557                         | SRR2047316 | 2014 | 5 | North America | United States | Enteritidis (Predicted) | Enteritidis | 1425  | 34488 |
| SAL_BA3939AA | CFSAN032553                         | SRR2047312 | 2014 | 5 | North America | United States | Enteritidis (Predicted) | Enteritidis | 27901 | 34482 |
| SAL_BA3941AA | CFSAN032549                         | SRR2047311 | 2014 | 5 | North America | United States | Enteritidis (Predicted) | Enteritidis | 1425  | 34480 |
| SAL_BA3945AA | CFSAN032550                         | SRR2047309 | 2014 | 5 | North America | United States | Enteritidis (Predicted) | Enteritidis | 1425  | 34476 |
| SAL_BA3956AA | CFSAN032543                         | SRR2047304 | 2014 | 5 | North America | United States | Enteritidis (Predicted) | Enteritidis | 1425  | 34467 |
| SAL_BA3967AA | CFSAN032539                         | SRR2047299 | 2014 | 5 | North America | United States | Enteritidis (Predicted) | Enteritidis | 1425  | 34458 |
| SAL_BA3973AA | IEH-NGS-SAL-02822                   | SRR2047296 | 2014 | 5 | North America | United States | Enteritidis (Predicted) | Enteritidis | 1425  | 34453 |
| SAL_BA3979AA | CFSAN032347                         | SRR2047293 | 2014 | 5 | North America | United States | Enteritidis (Predicted) | Enteritidis | 1425  | 34448 |
| SAL_BA3983AA | WAPHL_SAL-A00780                    | SRR2047291 | 2006 |   | North America | United States | Enteritidis             | Enteritidis | 1425  | 34445 |
| SAL_BA3990AA | PNUSA5000399                        | SRR2043725 | 2015 | 4 | North America | United States | Enteritidis             | Enteritidis | 1425  | 34439 |
| SAL_BA3992AA | PNUSA5000398                        | SRR2043724 | 2015 | 4 | North America | United States | Enteritidis             | Enteritidis | 1425  | 34438 |
| SAL_BA3994AA | PNUSA5000397                        | SRR2043723 | 2015 | 4 | North America | United States | Enteritidis             | Enteritidis | 1425  | 34437 |
| SAL_BA4015AA | 250909-sc-2013-04-16T07:3:ERR338318 |            |      |   |               |               | Enteritidis             | Enteritidis | 1425  | 34419 |
| SAL_BA4019AA | 472274-sc-2013-04-16T07:3:ERR338316 |            |      |   |               |               | Enteritidis             | Enteritidis | 1425  | 34500 |
| SAL_BA4021AA | 317576-sc-2013-04-16T07:3:ERR338315 |            |      |   |               |               | Enteritidis             | Enteritidis | 1425  | 34415 |
| SAL_BA4023AA | 496155-sc-2013-04-16T07:3:ERR338314 |            |      |   |               |               | Enteritidis             | Enteritidis | 3888  | 34369 |
| SAL_BA4025AA | 249309-sc-2013-04-16T07:3:ERR338313 |            |      |   |               |               | Enteritidis             | Enteritidis | 1425  | 34412 |
| SAL_BA4027AA | 569257-sc-2013-04-16T07:3:ERR338312 |            |      |   |               |               | Enteritidis             | Enteritidis | 3888  | 34410 |
| SAL_BA4029AA | 380425-sc-2013-04-16T07:3:ERR338311 |            |      |   |               |               | Enteritidis             | Enteritidis | 1425  | 34408 |
| SAL_BA4030AA | 319184-sc-2013-04-16T07:3:ERR338310 |            |      |   |               |               | Enteritidis             | Enteritidis | 1425  | 41305 |
| SAL_BA4036AA | 348823-sc-2013-04-16T07:3:ERR338307 |            |      |   |               |               | Enteritidis             | Enteritidis | 1425  | 34404 |
| SAL_BA4038AA | PNUSA5000360                        | SRR2043701 |      |   | North America | United States | Enteritidis             | Enteritidis | 1425  | 34403 |
| SAL_BA4039AA | 492225-sc-2013-04-16T07:3:ERR338306 |            |      |   |               |               | Enteritidis             | Enteritidis | 3888  | 34381 |
| SAL_BA4040AA | PNUSA5000359                        | SRR2043700 |      |   | North America | United States | Enteritidis             | Enteritidis | 1425  | 34402 |
| SAL_BA4043AA | 570523-sc-2013-04-16T07:3:ERR338304 |            |      |   |               |               | Enteritidis             | Enteritidis | 1425  | 34399 |
| SAL_BA4045AA | 533511-sc-2013-04-16T07:3:ERR338303 |            |      |   |               |               | Enteritidis             | Enteritidis | 1425  | 34397 |
| SAL_BA4047AA | 358520-sc-2013-04-16T07:3:ERR338302 |            |      |   |               |               | Enteritidis             | Enteritidis | 1425  | 41304 |
| SAL_BA4050AA | 254602-sc-2013-04-16T07:3:ERR338301 |            |      |   |               |               | Enteritidis             | Enteritidis | 1425  | 41425 |
| SAL_BA4051AA | 204225-sc-2013-04-16T07:3:ERR338300 |            |      |   |               |               | Enteritidis             | Enteritidis | 1425  | 41309 |
| SAL_BA4053AA | 238579-sc-2013-04-16T07:3:ERR338299 |            |      |   |               |               | Enteritidis             | Enteritidis | 1425  | 34393 |
| SAL_BA4054AA | PNUSA5000352                        | SRR2043693 | 2015 | 4 | North America | United States | Enteritidis             | Enteritidis | 1425  | 34392 |
| SAL_BA4057AA | 290914-sc-2013-04-16T07:3:ERR338297 |            |      |   |               |               | Enteritidis             | Enteritidis | 1425  | 34390 |
| SAL_BA4059AA | 626285-sc-2013-04-16T07:3:ERR338296 |            |      |   |               |               | Enteritidis             | Enteritidis | 1425  | 34380 |
| SAL_BA4061AA | 485533-sc-2013-04-16T07:3:ERR338295 |            |      |   |               |               | Enteritidis             | Enteritidis | 1425  | 34386 |
| SAL_BA4063AA | 459755-sc-2013-04-16T07:3:ERR338294 |            |      |   |               |               | Enteritidis             | Enteritidis | 3888  | 34384 |
| SAL_BA4066AA | 283957-sc-2013-04-16T07:3:ERR338293 |            |      |   |               |               | Enteritidis             | Enteritidis | 1425  | 41500 |
| SAL_BA4068AA | 119691-sc-2013-04-16T07:3:ERR338292 |            |      |   |               |               | Enteritidis             | Enteritidis | 1425  | 41320 |
| SAL_BA4070AA | 468192-sc-2013-04-16T07:3:ERR338291 |            |      |   |               |               | Enteritidis             | Enteritidis | 1425  | 34382 |
| SAL_BA4072AA | 684397-sc-2013-04-16T07:3:ERR338290 |            |      |   |               |               | Enteritidis             | Enteritidis | 3888  | 34369 |
| SAL_BA4073AA | 2015K-0280                          | SRR2043477 |      |   | North America | United States | Enteritidis (Predicted) | Enteritidis | 1425  | 21858 |
| SAL_BA4074AA | 492221-sc-2013-04-16T07:3:ERR338289 |            |      |   |               |               | Enteritidis             | Enteritidis | 3888  | 34381 |

|              |                                      |            |      |    |  |               |               |                         |             |       |       |
|--------------|--------------------------------------|------------|------|----|--|---------------|---------------|-------------------------|-------------|-------|-------|
| SAL_BA4075AA | 2015K-0278                           | SRR2043476 |      |    |  | North America | United States | Enteritidis (Predicted) | Enteritidis | 1425  | 21858 |
| SAL_BA4076AA | 626279-sc-2013-04-16T07:3:ERR338288  |            |      |    |  |               |               | Enteritidis             | Enteritidis | 1425  | 34380 |
| SAL_BA4077AA | 2015K-0279                           | SRR2043475 | 2014 | 10 |  | North America | United States | Enteritidis (Predicted) | Enteritidis | 1425  | 34379 |
| SAL_BA4078AA | 236817-sc-2013-04-16T07:3:ERR338287  |            |      |    |  |               |               | Enteritidis             | Enteritidis | 1425  | 34378 |
| SAL_BA4079AA | 2015K-0277                           | SRR2043474 | 2014 | 11 |  | North America | United States | Enteritidis (Predicted) | Enteritidis | 1425  | 34377 |
| SAL_BA4080AA | 468205-sc-2013-04-16T07:3:ERR338286  |            |      |    |  |               |               | Enteritidis             | Enteritidis | 1425  | 34376 |
| SAL_BA4082AA | 245880-sc-2013-04-16T07:3:ERR338285  |            |      |    |  |               |               | Enteritidis             | Enteritidis | 1425  | 34374 |
| SAL_BA4083AA | CFSAN032367                          | SRR2043313 | 2014 | 6  |  | North America | United States | Enteritidis (Predicted) | Enteritidis | 1425  | 34373 |
| SAL_BA4085AA | 481587-sc-2013-04-16T07:3:ERR338284  |            |      |    |  |               |               | Enteritidis             | Enteritidis | 1425  | 41498 |
| SAL_BA4087AA | 172848-sc-2013-04-16T07:3:ERR338283  |            |      |    |  |               |               | Enteritidis             | Enteritidis | 1425  | 34370 |
| SAL_BA4089AA | 684394-sc-2013-04-16T07:3:ERR338282  |            |      |    |  |               |               | Enteritidis             | Enteritidis | 3888  | 34369 |
| SAL_BA4091AA | 570890-sc-2013-04-16T07:3:ERR338281  |            |      |    |  |               |               | Enteritidis             | Enteritidis | 3888  | 34367 |
| SAL_BA4092AA | CFSAN032394                          | SRR2043308 | 2014 | 6  |  | North America | United States | Enteritidis (Predicted) | Enteritidis | 1425  | 34366 |
| SAL_BA4093AA | 631484-sc-2013-04-16T07:3:ERR338280  |            |      |    |  |               |               | Enteritidis             | Enteritidis | 1425  | 41497 |
| SAL_BA4095AA | 247274-sc-2013-04-16T07:3:ERR338279  |            |      |    |  |               |               | Enteritidis             | Enteritidis | 1425  | 34419 |
| SAL_BA4097AA | 180211-sc-2013-04-16T07:3:ERR338278  |            |      |    |  |               |               | Enteritidis             | Enteritidis | 1425  | 41322 |
| SAL_BA4102AA | CFSAN032354                          | SRR2043303 | 2014 | 5  |  | North America | United States | Enteritidis (Predicted) | Enteritidis | 27901 | 34361 |
| SAL_BA4103AA | 1029414-sc-2013-04-16T07:3:ERR338275 |            |      |    |  |               |               | Enteritidis             | Enteritidis | 1425  | 34360 |
| SAL_BA4104AA | IEH-NGS-SAL-02819                    | SRR2043302 | 2014 | 6  |  | North America | United States | Enteritidis (Predicted) | Enteritidis | 1425  | 34359 |
| SAL_BA4105AA | 508751-sc-2013-04-16T07:3:ERR338274  |            |      |    |  |               |               | Enteritidis             | Enteritidis | 3888  | 41308 |
| SAL_BA4107AA | 584640-sc-2013-04-16T07:3:ERR338273  |            |      |    |  |               |               | Enteritidis             | Enteritidis | 1425  | 41310 |
| SAL_BA4108AA | CFSAN032382                          | SRR2043300 | 2014 | 6  |  | North America | United States | Enteritidis (Predicted) | Enteritidis | 1425  | 34357 |
| SAL_BA4109AA | 624887-sc-2013-04-16T07:3:ERR338272  |            |      |    |  |               |               | Enteritidis             | Enteritidis | 3888  | 41321 |
| SAL_BA4111AA | 120673-sc-2013-04-16T07:3:ERR338271  |            |      |    |  |               |               | Enteritidis             | Enteritidis | 1425  | 41320 |
| SAL_BA4112AA | CFSAN032366                          | SRR2043298 | 2014 | 6  |  | North America | United States | Enteritidis (Predicted) | Enteritidis | 1425  | 34355 |
| SAL_BA4113AA | 238663-sc-2013-04-16T07:3:ERR338270  |            |      |    |  |               |               | Enteritidis             | Enteritidis | 1425  | 34354 |
| SAL_BA4119AA | 454790-sc-2013-04-16T07:3:ERR338267  |            |      |    |  |               |               | Enteritidis             | Enteritidis | 3888  | 41319 |
| SAL_BA4121AA | 503944-sc-2013-04-16T07:3:ERR338266  |            |      |    |  |               |               | Enteritidis             | Enteritidis | 1425  | 41316 |
| SAL_BA4123AA | 584643-sc-2013-04-16T07:3:ERR338265  |            |      |    |  |               |               | Enteritidis             | Enteritidis | 1425  | 41318 |
| SAL_BA4125AA | 616854-sc-2013-04-16T07:3:ERR338264  |            |      |    |  |               |               | Enteritidis             | Enteritidis | 3888  | 41315 |
| SAL_BA4131AA | 332287-sc-2013-04-16T07:3:ERR338261  |            |      |    |  |               |               | Enteritidis             | Enteritidis | 1425  | 41317 |
| SAL_BA4133AA | 332662-sc-2013-04-16T07:3:ERR338260  |            |      |    |  |               |               | Enteritidis             | Enteritidis | 1425  | 41317 |
| SAL_BA4137AA | 503933-sc-2013-04-16T07:3:ERR338258  |            |      |    |  |               |               | Enteritidis             | Enteritidis | 1425  | 41316 |
| SAL_BA4140AA | CFSAN032393                          | SRR2043283 | 2014 | 6  |  | North America | United States | Enteritidis (Predicted) | Enteritidis | 1425  | 34341 |
| SAL_BA4141AA | 616851-sc-2013-04-16T07:3:ERR338256  |            |      |    |  |               |               | Enteritidis             | Enteritidis | 3888  | 41315 |
| SAL_BA4144AA | CFSAN032390                          | SRR2043281 | 2014 | 6  |  | North America | United States | Enteritidis (Predicted) | Enteritidis | 1425  | 32445 |
| SAL_BA4145AA | 283954-sc-2013-04-16T07:3:ERR338254  |            |      |    |  |               |               | Enteritidis             | Enteritidis | 1425  | 34419 |
| SAL_BA4146AA | CFSAN032384                          | SRR2043280 | 2014 | 6  |  | North America | United States | Enteritidis (Predicted) | Enteritidis | 1425  | 34339 |
| SAL_BA4147AA | 361592-sc-2013-04-16T07:3:ERR338253  |            |      |    |  |               |               | Enteritidis             | Enteritidis | 1425  | 34399 |
| SAL_BA4149AA | 482916-sc-2013-04-16T07:3:ERR338252  |            |      |    |  |               |               | Enteritidis             | Enteritidis | 1425  | 41307 |
| SAL_BA4154AA | CFSAN032351                          | SRR2043276 | 2014 | 5  |  | North America | United States | Enteritidis (Predicted) | Enteritidis | 28592 | 34334 |
| SAL_BA4207AA | A134                                 | ERR338066  |      |    |  |               |               | Typhi                   | Enteritidis | 7802  | 31241 |
| SAL_BA4213AA | A129                                 | ERR338063  |      |    |  |               |               | Typhi                   | Enteritidis | 7802  | 34305 |
| SAL_BA4221AA | A124                                 | ERR338059  |      |    |  |               |               | Typhi                   | Enteritidis | 1425  | 34295 |
| SAL_BA4226AA | A120                                 | ERR338056  |      |    |  |               |               | Typhi                   | Enteritidis | 7802  | 34296 |
| SAL_BA4227AA | CFSAN032344                          | SRR2039250 | 2014 | 5  |  | North America | United States | Enteritidis (Predicted) | Enteritidis | 1425  | 32809 |
| SAL_BA4228AA | A119                                 | ERR338055  |      |    |  |               |               | Typhi                   | Enteritidis | 1425  | 34295 |
| SAL_BA4230AA | A117                                 | ERR338054  |      |    |  |               |               | Typhi                   | Enteritidis | 7802  | 31241 |
| SAL_BA4246AA | CFSAN032325                          | SRR2039241 | 2014 | 5  |  | North America | United States | Enteritidis (Predicted) | Enteritidis | 1425  | 34280 |
| SAL_BA4261AA | CFSAN032307                          | SRR2039158 | 2014 | 5  |  | North America | United States | Enteritidis (Predicted) | Enteritidis | 1425  | 34266 |
| SAL_BA4263AA | CFSAN032304                          | SRR2039157 | 2014 | 5  |  | North America | United States | Enteritidis (Predicted) | Enteritidis | 1425  | 34264 |
| SAL_BA4270AA | CFSAN032306                          | SRR2039153 | 2014 | 5  |  | North America | United States | Enteritidis (Predicted) | Enteritidis | 1425  | 32809 |
| SAL_BA4295AA | 368908                               | ERR338022  |      |    |  |               |               | Typhi                   | Enteritidis | 1425  | 34241 |
| SAL_BA4302AA | CFSAN032300                          | SRR2039137 | 2014 | 5  |  | North America | United States | Enteritidis (Predicted) | Enteritidis | 1425  | 34234 |
| SAL_BA4338AA | CFSAN032305                          | SRR2039119 | 2014 | 5  |  | North America | United States | Enteritidis (Predicted) | Enteritidis | 1425  | 34207 |
| SAL_BA4382AA | 15MNO0153                            | SRR2035447 | 2015 | 4  |  | North America | United States | Enteritidis             | Enteritidis | 1425  | 34173 |
| SAL_BA4385AA | 15MNO0156                            | SRR2035444 | 2015 | 5  |  | North America | United States | Enteritidis             | Enteritidis | 1425  | 34170 |
| SAL_BA4387AA | 15MNO0155                            | SRR2035443 | 2015 | 5  |  | North America | United States | Enteritidis             | Enteritidis | 1425  | 34168 |
| SAL_BA4389AA | 15MNO0152                            | SRR2035441 | 2015 | 4  |  | North America | United States | Enteritidis             | Enteritidis | 1425  | 34167 |

|              |                   |            |      |   |               |               |                         |             |       |       |
|--------------|-------------------|------------|------|---|---------------|---------------|-------------------------|-------------|-------|-------|
| SAL_BA4397AA | 15MN00147         | SRR2035434 | 2015 | 4 | North America | United States | Enteritidis             | Enteritidis | 1425  | 34161 |
| SAL_BA4399AA | IEH-NGS-SAL-02708 | SRR2035433 | 2014 | 5 | North America | United States | Enteritidis (Predicted) | Enteritidis | 1425  | 34159 |
| SAL_BA4401AA | 15MN00154         | SRR2035430 | 2015 | 5 | North America | United States | Enteritidis             | Enteritidis | 1425  | 11501 |
| SAL_BA4403AA | 15MN00067         | SRR2035429 | 2015 | 2 | North America | United States | Enteritidis             | Enteritidis | 1425  | 34156 |
| SAL_BA4405AA | 15MN00146         | SRR2035428 | 2015 | 4 | North America | United States | Enteritidis             | Enteritidis | 1425  | 34155 |
| SAL_BA4409AA | CFSAN031253       | SRR2035426 | 2014 | 5 | North America | United States | Enteritidis (Predicted) | Enteritidis | 1425  | 34151 |
| SAL_BA4411AA | CFSAN031250       | SRR2035425 | 2014 | 5 | North America | United States | Enteritidis (Predicted) | Enteritidis | 1425  | 34149 |
| SAL_BA4414AA | 15MN00144         | SRR2035412 | 2015 | 4 | North America | United States | Enteritidis             | Enteritidis | 27901 | 34146 |
| SAL_BA4416AA | CFSAN032297       | SRR2035411 | 2014 | 5 | North America | United States | Enteritidis (Predicted) | Enteritidis | 1425  | 34145 |
| SAL_BA4418AA | CFSAN031260       | SRR2035410 | 2014 | 5 | North America | United States | Enteritidis (Predicted) | Enteritidis | 1425  | 34143 |
| SAL_BA4422AA | 15MN00158         | SRR2035408 | 2015 | 5 | North America | United States | Enteritidis             | Enteritidis | 1425  | 17527 |
| SAL_BA4424AA | 15MN00157         | SRR2035407 | 2015 | 5 | North America | United States | Enteritidis             | Enteritidis | 1425  | 17527 |
| SAL_BA4426AA | 15MN00149         | SRR2035406 | 2015 | 4 | North America | United States | Enteritidis             | Enteritidis | 1425  | 34138 |
| SAL_BA4428AA | 15MN00148         | SRR2035405 | 2015 | 4 | North America | United States | Enteritidis             | Enteritidis | 1425  | 34136 |
| SAL_BA4430AA | 15MN00145         | SRR2035401 | 2015 | 4 | North America | United States | Enteritidis             | Enteritidis | 1425  | 34134 |
| SAL_BA4442AA | CFSAN031259       | SRR2035394 | 2014 | 5 | North America | United States | Enteritidis (Predicted) | Enteritidis | 1425  | 34123 |
| SAL_BA4445AA | CFSAN031249       | SRR2035391 | 2014 | 5 | North America | United States | Enteritidis (Predicted) | Enteritidis | 1425  | 34120 |
| SAL_BA4451AA | CFSAN032298       | SRR2035387 | 2014 | 5 | North America | United States | Enteritidis (Predicted) | Enteritidis | 1425  | 34114 |
| SAL_BA4538AA | MM_SW824_14_2     | ERR197441  |      |   |               |               | Enteritidis             | Enteritidis | 28601 | 34068 |
| SAL_BA4540AA | MM_SW824_14_1     | ERR197440  |      |   |               |               | Enteritidis             | Enteritidis | 1425  | 34067 |
| SAL_BA4542AA | MM_SW824_14       | ERR197439  |      |   |               |               | Enteritidis             | Enteritidis | 1425  | 34066 |
| SAL_BA4544AA | MM_SW824_10       | ERR197438  |      |   |               |               | Enteritidis             | Enteritidis | 1425  | 34065 |
| SAL_BA4545AA | MM_SW824_7        | ERR197437  |      |   |               |               | Enteritidis             | Enteritidis | 1425  | 34064 |
| SAL_BA4547AA | MM_SW824_4        | ERR197436  |      |   |               |               | Enteritidis             | Enteritidis | 1425  | 34062 |
| SAL_BA4550AA | MM_SW824_1        | ERR197435  |      |   |               |               | Enteritidis             | Enteritidis | 1425  | 34061 |
| SAL_BA4552AA | MM_SW824_0        | ERR197434  |      |   |               |               | Enteritidis             | Enteritidis | 1425  | 34022 |
| SAL_BA4554AA | MM_PT4_14_2       | ERR197433  |      |   |               |               | Enteritidis             | Enteritidis | 1425  | 34055 |
| SAL_BA4555AA | MM_PT4_14_1       | ERR197432  |      |   |               |               | Enteritidis             | Enteritidis | 1425  | 34055 |
| SAL_BA4557AA | MM_PT4_14         | ERR197431  |      |   |               |               | Enteritidis             | Enteritidis | 1425  | 34055 |
| SAL_BA4559AA | MM_PT4_10         | ERR197430  |      |   |               |               | Enteritidis             | Enteritidis | 1425  | 34055 |
| SAL_BA4561AA | MM_PT4_7          | ERR197429  |      |   |               |               | Enteritidis             | Enteritidis | 1425  | 34055 |
| SAL_BA4563AA | MM_PT4_4          | ERR197428  |      |   |               |               | Enteritidis             | Enteritidis | 1425  | 34055 |
| SAL_BA4565AA | MM_PT4_1          | ERR197427  |      |   |               |               | Enteritidis             | Enteritidis | 1425  | 34055 |
| SAL_BA4567AA | MM_PT4_0          | ERR197426  |      |   |               |               | Enteritidis             | Enteritidis | 1425  | 34011 |
| SAL_BA4587AA | LB_SW824_14_2     | ERR197416  |      |   |               |               | Enteritidis             | Enteritidis | 1425  | 34039 |
| SAL_BA4589AA | LB_SW824_14_1     | ERR197415  |      |   |               |               | Enteritidis             | Enteritidis | 1425  | 34037 |
| SAL_BA4591AA | LB_SW824_14       | ERR197414  |      |   |               |               | Enteritidis             | Enteritidis | 1425  | 34022 |
| SAL_BA4596AA | LB_SW824_10       | ERR197412  |      |   |               |               | Enteritidis             | Enteritidis | 1425  | 34031 |
| SAL_BA4598AA | LB_SW824_7        | ERR197411  |      |   |               |               | Enteritidis             | Enteritidis | 1425  | 34029 |
| SAL_BA4601AA | LB_SW824_4        | ERR197410  |      |   |               |               | Enteritidis             | Enteritidis | 1425  | 34026 |
| SAL_BA4603AA | LB_SW824_1        | ERR197409  |      |   |               |               | Enteritidis             | Enteritidis | 1425  | 34024 |
| SAL_BA4604AA | CFSAN031220       | SRR2029478 | 2014 | 4 | North America | United States | Enteritidis (Predicted) | Enteritidis | 1425  | 34023 |
| SAL_BA4605AA | LB_SW824_0        | ERR197408  |      |   |               |               | Enteritidis             | Enteritidis | 1425  | 34022 |
| SAL_BA4606AA | CFSAN031221       | SRR2029477 | 2014 | 5 | North America | United States | Enteritidis (Predicted) | Enteritidis | 1425  | 34021 |
| SAL_BA4607AA | LB_PT4_14_2       | ERR197407  |      |   |               |               | Enteritidis             | Enteritidis | 1425  | 34011 |
| SAL_BA4609AA | LB_PT4_14_1       | ERR197406  |      |   |               |               | Enteritidis             | Enteritidis | 1425  | 34011 |
| SAL_BA4610AA | IEH-NGS-SAL-02674 | SRR2029475 | 2014 | 4 | North America | United States | Enteritidis (Predicted) | Enteritidis | -1739 | 34019 |
| SAL_BA4611AA | LB_PT4_14         | ERR197405  |      |   |               |               | Enteritidis             | Enteritidis | 1425  | 34011 |
| SAL_BA4613AA | LB_PT4_13         | ERR197404  |      |   |               |               | Enteritidis             | Enteritidis | 1425  | 34017 |
| SAL_BA4615AA | LB_PT4_10         | ERR197403  |      |   |               |               | Enteritidis             | Enteritidis | 1425  | 34011 |
| SAL_BA4617AA | LB_PT4_7          | ERR197402  |      |   |               |               | Enteritidis             | Enteritidis | 1425  | 34011 |
| SAL_BA4618AA | IEH-NGS-SAL-02670 | SRR2029471 | 2014 | 4 | North America | United States | Enteritidis (Predicted) | Enteritidis | 1425  | 34014 |
| SAL_BA4620AA | LB_PT4_4          | ERR197401  |      |   |               |               | Enteritidis             | Enteritidis | 1425  | 34011 |
| SAL_BA4622AA | LB_PT4_1          | ERR197400  |      |   |               |               | Enteritidis             | Enteritidis | 1425  | 34011 |
| SAL_BA4623AA | CFSAN031212       | SRR2029468 | 2014 | 5 | North America | United States | Enteritidis (Predicted) | Enteritidis | 1425  | 32445 |
| SAL_BA4624AA | LB_PT4_0          | ERR197399  |      |   |               |               | Enteritidis             | Enteritidis | 1425  | 34011 |
| SAL_BA4631AA | CFSAN031207       | SRR2029464 | 2014 | 4 | North America | United States | Enteritidis (Predicted) | Enteritidis | 1425  | 34005 |
| SAL_BA4638AA | PNUSAS000351      | SRR2025325 | 2015 | 4 | North America | United States | Enteritidis             | Enteritidis | 1425  | 34000 |
| SAL_BA4640AA | PNUSAS000350      | SRR2025324 |      |   | North America | United States | Enteritidis (Predicted) | Enteritidis | 1425  | 10874 |



|              |                   |            |      |    |               |               |                         |             |       |       |
|--------------|-------------------|------------|------|----|---------------|---------------|-------------------------|-------------|-------|-------|
| SAL_BA4642AA | PNUSAS000349      | SRR2025323 |      |    | North America | United States | Enteritidis (Predicted) | Enteritidis | 1425  | 2067  |
| SAL_BA4644AA | PNUSAS000347      | SRR2025321 |      |    | North America | United States | Enteritidis (Predicted) | Enteritidis | 1425  | 33997 |
| SAL_BA4646AA | PNUSAS000346      | SRR2025320 |      |    | North America | United States | Enteritidis (Predicted) | Enteritidis | 1425  | 33996 |
| SAL_BA4648AA | PNUSAS000345      | SRR2025319 |      |    | North America | United States | Enteritidis (Predicted) | Enteritidis | 1425  | 16644 |
| SAL_BA4650AA | PNUSAS000344      | SRR2025318 |      |    | North America | United States | Enteritidis (Predicted) | Enteritidis | 1425  | 25745 |
| SAL_BA4652AA | PNUSAS000343      | SRR2025317 |      |    | North America | United States | Enteritidis (Predicted) | Enteritidis | 1425  | 33993 |
| SAL_BA4653AA | PNUSAS000342      | SRR2025316 |      |    | North America | United States | Enteritidis (Predicted) | Enteritidis | 1425  | 33992 |
| SAL_BA4657AA | PNUSAS000339      | SRR2025314 | 2015 | 4  | North America | United States | Enteritidis             | Enteritidis | 1425  | 33988 |
| SAL_BA4659AA | PNUSAS000340      | SRR2025313 | 2015 | 4  | North America | United States | Enteritidis             | Enteritidis | 1425  | 33986 |
| SAL_BA4662AA | PNUSAS000337      | SRR2025311 |      |    | North America | United States | Enteritidis (Predicted) | Enteritidis | 1425  | 33984 |
| SAL_BA4664AA | PNUSAS000335      | SRR2025309 |      |    | North America | United States | Enteritidis (Predicted) | Enteritidis | 7801  | 25753 |
| SAL_BA4666AA | PNUSAS000336      | SRR2025308 |      |    | North America | United States | Enteritidis (Predicted) | Enteritidis | 1425  | 12315 |
| SAL_BA4668AA | PNUSAS000334      | SRR2025307 |      |    | North America | United States | Enteritidis (Predicted) | Enteritidis | 1425  | 1808  |
| SAL_BA4680AA | PNUSAS000280      | SRR2025301 |      |    | North America | United States | Enteritidis (Predicted) | Enteritidis | 1425  | 33973 |
| SAL_BA4688AA | IEH_NGS_SAL_00292 | SRR961991  | 2008 | 8  | North America | United States | Enteritidis (Predicted) | Enteritidis | 1425  | 33967 |
| SAL_BA4694AA | IEH_NGS_SAL_00207 | SRR961988  | 2008 | 3  | North America | United States | Enteritidis (Predicted) | Enteritidis | 1425  | 33961 |
| SAL_BA4731AA | MDH-2014-00842    | SRR1514744 | 2014 | 7  | North America | United States | Enteritidis             | Enteritidis | 1425  | 33930 |
| SAL_BA4733AA | MDH-2014-00841    | SRR1514726 | 2014 | 7  | North America | United States | Enteritidis             | Enteritidis | 1425  | 12265 |
| SAL_BA4735AA | CFSAN031197       | SRR2017888 | 2014 | 4  | North America | United States | Enteritidis (Predicted) | Enteritidis | 1425  | 33927 |
| SAL_BA4743AA | NY-N13666         | SRR2017884 | 2007 |    | North America | United States | Enteritidis             | Enteritidis | 1425  | 30959 |
| SAL_BA4758AA | CFSAN031190       | SRR2017876 | 2014 | 5  | North America | United States | Enteritidis (Predicted) | Enteritidis | 1425  | 33909 |
| SAL_BA4793AA | CFSAN031192       | SRR2017855 | 2014 | 4  | North America | United States | Enteritidis (Predicted) | Enteritidis | 1425  | 16630 |
| SAL_BA4799AA | IEH-NGS-SAL-02639 | SRR2017852 | 2014 | 4  | North America | United States | Enteritidis (Predicted) | Enteritidis | 1425  | 33886 |
| SAL_BA4847AA | CFSAN022634       | SRR2016682 |      |    | North America | United States | Enteritidis             | Enteritidis | 1425  | 33856 |
| SAL_BA4861AA | IEH-NGS-SAL-02617 | SRR2015924 | 2014 | 4  | North America | United States | Enteritidis (Predicted) | Enteritidis | 1425  | 33843 |
| SAL_BA4875AA | A147              | ERR331213  |      |    |               |               | Typhi                   | Enteritidis | 7802  | 41035 |
| SAL_BA4881AA | CFSAN031177       | SRR2015824 | 2014 | 4  | North America | United States | Enteritidis (Predicted) | Enteritidis | 1425  | 33829 |
| SAL_BA4982AA | CFSAN031164       | SRR2015687 | 2014 | 4  | North America | United States | Enteritidis (Predicted) | Enteritidis | 1425  | 33742 |
| SAL_BA5006AA | VA-WGS-00435      | SRR2015664 | 2014 | 1  | North America | United States | Enteritidis             | Enteritidis | 1425  | 33718 |
| SAL_BA5012AA | CFSAN024486       | SRR2015661 | 2009 | 11 | North America | Mexico        | Berta                   | Enteritidis | 1425  | 33712 |
| SAL_BA5091AA | PNUSAS000306      | SRR2015095 |      |    | North America | United States | Enteritidis             | Enteritidis | 1425  | 33645 |
| SAL_BA5093AA | PNUSAS000307      | SRR2015094 |      |    | North America | United States | Enteritidis             | Enteritidis | 1425  | 33643 |
| SAL_BA5095AA | PNUSAS000305      | SRR2015093 |      |    | North America | United States | Enteritidis             | Enteritidis | 1425  | 33641 |
| SAL_BA5099AA | PNUSAS000304      | SRR2015090 |      |    | North America | United States | Enteritidis             | Enteritidis | 1425  | 33637 |
| SAL_BA5101AA | PNUSAS000299      | SRR2015089 | 2015 | 4  | North America | United States | Enteritidis             | Enteritidis | 1425  | 33634 |
| SAL_BA5105AA | PNUSAS000294      | SRR2015087 | 2015 | 4  | North America | United States | Enteritidis             | Enteritidis | 8003  | 12492 |
| SAL_BA5107AA | PNUSAS000293      | SRR2015086 | 2015 | 4  | North America | United States | Enteritidis             | Enteritidis | 1425  | 17527 |
| SAL_BA5109AA | PNUSAS000292      | SRR2015085 | 2015 | 4  | North America | United States | Enteritidis             | Enteritidis | 1425  | 33629 |
| SAL_BA5111AA | PNUSAS000290      | SRR2015084 | 2015 | 4  | North America | United States | Enteritidis             | Enteritidis | 1425  | 33628 |
| SAL_BA5113AA | PNUSAS000291      | SRR2015083 |      |    | North America | United States | Enteritidis (Predicted) | Enteritidis | 1425  | 33627 |
| SAL_BA5115AA | PNUSAS000289      | SRR2015082 |      |    | North America | United States | Enteritidis (Predicted) | Enteritidis | 1425  | 25745 |
| SAL_BA5117AA | PNUSAS000288      | SRR2015081 |      |    | North America | United States | Enteritidis (Predicted) | Enteritidis | 1425  | 33625 |
| SAL_BA5119AA | PNUSAS000287      | SRR2015080 | 2015 | 3  | North America | United States | Enteritidis             | Enteritidis | 28616 | 33623 |
| SAL_BA5122AA | PNUSAS000286      | SRR2015079 | 2015 | 3  | North America | United States | Enteritidis             | Enteritidis | 1425  | 2067  |
| SAL_BA5123AA | PNUSAS000283      | SRR2015078 | 2015 | 3  | North America | United States | Enteritidis             | Enteritidis | 1425  | 33620 |
| SAL_BA5126AA | PNUSAS000281      | SRR2015077 | 2015 | 3  | North America | United States | Enteritidis             | Enteritidis | 1425  | 33617 |
| SAL_BA5127AA | PNUSAS000282      | SRR2015076 | 2015 | 3  | North America | United States | Enteritidis             | Enteritidis | 1425  | 33616 |
| SAL_BA5129AA | PNUSAS000279      | SRR2015075 | 2015 | 1  | North America | United States | Enteritidis             | Enteritidis | 1425  | 33615 |
| SAL_BA5131AA | PNUSAS000278      | SRR2015074 |      |    | North America | United States | Enteritidis (Predicted) | Enteritidis | 1425  | 33614 |
| SAL_BA5133AA | PNUSAS000277      | SRR2015073 | 2015 | 1  | North America | United States | Enteritidis             | Enteritidis | 1425  | 33612 |
| SAL_BA5135AA | PNUSAS000276      | SRR2015072 | 2015 | 3  | North America | United States | Enteritidis             | Enteritidis | 1425  | 33610 |
| SAL_BA5137AA | PNUSAS000275      | SRR2015071 | 2015 | 3  | North America | United States | Enteritidis             | Enteritidis | 1425  | 2323  |
| SAL_BA5139AA | PNUSAS000274      | SRR2015070 | 2015 | 3  | North America | United States | Enteritidis             | Enteritidis | 1425  | 2323  |
| SAL_BA5141AA | PNUSAS000273      | SRR2015069 | 2015 | 3  | North America | United States | Enteritidis             | Enteritidis | 1425  | 33607 |
| SAL_BA5142AA | PNUSAS000272      | SRR2015068 | 2015 | 3  | North America | United States | Enteritidis             | Enteritidis | 1425  | 33607 |
| SAL_BA5144AA | PNUSAS000270      | SRR2015067 | 2015 | 3  | North America | United States | Enteritidis             | Enteritidis | 1425  | 33606 |
| SAL_BA5146AA | PNUSAS000269      | SRR2015066 | 2015 | 3  | North America | United States | Enteritidis             | Enteritidis | 1425  | 33604 |
| SAL_BA5147AA | PNUSAS000268      | SRR2015065 | 2015 | 3  | North America | United States | Enteritidis             | Enteritidis | 1425  | 33603 |
| SAL_BA5149AA | PNUSAS000267      | SRR2015064 | 2015 | 3  | North America | United States | Enteritidis             | Enteritidis | 1425  | 33602 |

|              |                            |            |      |   |               |               |                         |             |       |       |
|--------------|----------------------------|------------|------|---|---------------|---------------|-------------------------|-------------|-------|-------|
| SAL_BA5156AA | PNUSAS000233               | SRR2015060 | 2015 | 3 | North America | United States | Enteritidis             | Enteritidis | 28617 | 33597 |
| SAL_BA5177AA | 1020983-sc-2012-11-09T12:. | ERR235380  |      |   |               |               | Enteritidis (Predicted) | Enteritidis | 1424  | 33574 |
| SAL_BA5179AA | 34173-sc-2012-11-09T12:24: | ERR235320  |      |   |               |               | Enteritidis (Predicted) | Enteritidis | 3776  | 33579 |
| SAL_BA5180AA | 34083-sc-2012-11-09T12:24: | ERR235319  |      |   |               |               | Enteritidis (Predicted) | Enteritidis | 3776  | 33186 |
| SAL_BA5181AA | 33993-sc-2012-11-09T12:24: | ERR235318  |      |   |               |               | Enteritidis (Predicted) | Enteritidis | 3776  | 33184 |
| SAL_BA5182AA | 33943-sc-2012-11-09T12:24: | ERR235317  |      |   |               |               | Enteritidis (Predicted) | Enteritidis | 3776  | 33578 |
| SAL_BA5183AA | 33923-sc-2012-11-09T12:24: | ERR235316  |      |   |               |               | Enteritidis (Predicted) | Enteritidis | 3776  | 33577 |
| SAL_BA5184AA | 33913-sc-2012-11-09T12:24: | ERR235315  |      |   |               |               | Enteritidis (Predicted) | Enteritidis | 3776  | 33191 |
| SAL_BA5185AA | 33893-sc-2012-11-09T12:24: | ERR235314  |      |   |               |               | Enteritidis (Predicted) | Enteritidis | 3776  | 33191 |
| SAL_BA5186AA | 33873-sc-2012-11-09T12:24: | ERR235313  |      |   |               |               | Enteritidis (Predicted) | Enteritidis | 3776  | 33191 |
| SAL_BA5187AA | 33713-sc-2012-11-09T12:24: | ERR235312  |      |   |               |               | Enteritidis (Predicted) | Enteritidis | 3776  | 33576 |
| SAL_BA5188AA | 33703-sc-2012-11-09T12:24: | ERR235311  |      |   |               |               | Enteritidis (Predicted) | Enteritidis | 3776  | 33575 |
| SAL_BA5189AA | 33693-sc-2012-11-09T12:24: | ERR235310  |      |   |               |               | Enteritidis (Predicted) | Enteritidis | 3776  | 33184 |
| SAL_BA5191AA | A13216-sc-2012-11-09T12:2: | ERR235140  |      |   |               |               | Enteritidis (Predicted) | Enteritidis | 1424  | 33574 |
| SAL_BA5192AA | D3421-sc-2012-11-09T12:21  | ERR235139  |      |   |               |               | Enteritidis (Predicted) | Enteritidis | 1424  | 33573 |
| SAL_BA5193AA | A46872-sc-2012-11-09T12:2: | ERR235138  |      |   |               |               | Enteritidis (Predicted) | Enteritidis | 1425  | 33572 |
| SAL_BA5196AA | A49455-sc-2012-11-09T12:2: | ERR235135  |      |   |               |               | Enteritidis (Predicted) | Enteritidis | 1425  | 33569 |
| SAL_BA5198AA | D7378-sc-2012-11-09T12:21  | ERR235133  |      |   |               |               | Enteritidis (Predicted) | Enteritidis | 1424  | 33264 |
| SAL_BA5199AA | A6379-sc-2012-11-09T12:21: | ERR235132  |      |   |               |               | Enteritidis (Predicted) | Enteritidis | 1424  | 33200 |
| SAL_BA5200AA | 548-sc-2012-11-09T12:21:12 | ERR235131  |      |   |               |               | Enteritidis (Predicted) | Enteritidis | 1425  | 33257 |
| SAL_BA5202AA | D3419-sc-2012-11-09T12:21  | ERR235129  |      |   |               |               | Enteritidis (Predicted) | Enteritidis | 1424  | 33567 |
| SAL_BA5215AA | 33673-sc-2012-11-09T12:24: | ERR235308  |      |   |               |               | Enteritidis (Predicted) | Enteritidis | 3776  | 33557 |
| SAL_BA5216AA | 33663-sc-2012-11-09T12:24: | ERR235307  |      |   |               |               | Enteritidis (Predicted) | Enteritidis | 3776  | 33556 |
| SAL_BA5217AA | 33653-sc-2012-11-09T12:24: | ERR235306  |      |   |               |               | Enteritidis (Predicted) | Enteritidis | 3776  | 33184 |
| SAL_BA5218AA | 33623-sc-2012-11-09T12:24: | ERR235305  |      |   |               |               | Enteritidis (Predicted) | Enteritidis | 3776  | 33540 |
| SAL_BA5219AA | 33523-sc-2012-11-09T12:24: | ERR235304  |      |   |               |               | Enteritidis (Predicted) | Enteritidis | 3776  | 33184 |
| SAL_BA5220AA | 33513-sc-2012-11-09T12:23: | ERR235303  |      |   |               |               | Enteritidis (Predicted) | Enteritidis | 3776  | 33191 |
| SAL_BA5221AA | 33453-sc-2012-11-09T12:23: | ERR235302  |      |   |               |               | Enteritidis (Predicted) | Enteritidis | 3776  | 33184 |
| SAL_BA5222AA | 33393-sc-2012-11-09T12:23: | ERR235301  |      |   |               |               | Enteritidis (Predicted) | Enteritidis | 3776  | 33555 |
| SAL_BA5223AA | 33078-sc-2012-11-09T12:23: | ERR235300  |      |   |               |               | Enteritidis (Predicted) | Enteritidis | 3776  | 33554 |
| SAL_BA5224AA | 33033-sc-2012-11-09T12:23: | ERR235299  |      |   |               |               | Enteritidis (Predicted) | Enteritidis | 3776  | 33186 |
| SAL_BA5225AA | 33013-sc-2012-11-09T12:23: | ERR235298  |      |   |               |               | Enteritidis (Predicted) | Enteritidis | 3776  | 33553 |
| SAL_BA5226AA | 32853-sc-2012-11-09T12:23: | ERR235297  |      |   |               |               | Enteritidis (Predicted) | Enteritidis | 3776  | 33507 |
| SAL_BA5227AA | A30023-sc-2012-11-09T12:2: | ERR235128  |      |   |               |               | Enteritidis (Predicted) | Enteritidis | 1425  | 33552 |
| SAL_BA5228AA | A28666-sc-2012-11-09T12:2: | ERR235127  |      |   |               |               | Enteritidis (Predicted) | Enteritidis | 1425  | 33551 |
| SAL_BA5229AA | A58824-sc-2012-11-09T12:2: | ERR235126  |      |   |               |               | Enteritidis (Predicted) | Enteritidis | 1424  | 41355 |
| SAL_BA5230AA | A51300-sc-2012-11-09T12:2: | ERR235125  |      |   |               |               | Enteritidis (Predicted) | Enteritidis | 1425  | 33550 |
| SAL_BA5232AA | A7830-sc-2012-11-09T12:21: | ERR235123  |      |   |               |               | Enteritidis (Predicted) | Enteritidis | 1424  | 33291 |
| SAL_BA5235AA | D6437-sc-2012-11-09T12:21  | ERR235120  |      |   |               |               | Enteritidis (Predicted) | Enteritidis | 1424  | 33548 |
| SAL_BA5236AA | D5293-sc-2012-11-09T12:21  | ERR235119  |      |   |               |               | Enteritidis (Predicted) | Enteritidis | 1424  | 33547 |
| SAL_BA5242AA | 35713-sc-2012-11-09T12:24: | ERR235362  |      |   |               |               | Enteritidis (Predicted) | Enteritidis | 3776  | 33541 |
| SAL_BA5243AA | 35723-sc-2012-11-09T12:24: | ERR235361  |      |   |               |               | Enteritidis (Predicted) | Enteritidis | 3776  | 33540 |
| SAL_BA5244AA | 35773-sc-2012-11-09T12:24: | ERR235360  |      |   |               |               | Enteritidis (Predicted) | Enteritidis | 3776  | 33184 |
| SAL_BA5245AA | 35693-sc-2012-11-09T12:24: | ERR235359  |      |   |               |               | Enteritidis (Predicted) | Enteritidis | 3776  | 33539 |
| SAL_BA5246AA | 36103-sc-2012-11-09T12:24: | ERR235358  |      |   |               |               | Enteritidis (Predicted) | Enteritidis | 3776  | 33538 |
| SAL_BA5247AA | 36163-sc-2012-11-09T12:24: | ERR235357  |      |   |               |               | Enteritidis (Predicted) | Enteritidis | 3776  | 33537 |
| SAL_BA5248AA | 36173-sc-2012-11-09T12:24: | ERR235356  |      |   |               |               | Enteritidis (Predicted) | Enteritidis | 3776  | 33525 |
| SAL_BA5249AA | 36183-sc-2012-11-09T12:24: | ERR235355  |      |   |               |               | Enteritidis (Predicted) | Enteritidis | 3776  | 33184 |
| SAL_BA5250AA | 32863-sc-2012-11-09T12:23: | ERR235296  |      |   |               |               | Enteritidis (Predicted) | Enteritidis | 3776  | 33536 |
| SAL_BA5251AA | 32633-sc-2012-11-09T12:23: | ERR235295  |      |   |               |               | Enteritidis (Predicted) | Enteritidis | 3776  | 33194 |
| SAL_BA5252AA | 32523-sc-2012-11-09T12:23: | ERR235294  |      |   |               |               | Enteritidis (Predicted) | Enteritidis | 3776  | 33535 |
| SAL_BA5253AA | 32963-sc-2012-11-09T12:23: | ERR235293  |      |   |               |               | Enteritidis (Predicted) | Enteritidis | 3776  | 33534 |
| SAL_BA5254AA | 32013-sc-2012-11-09T12:23: | ERR235292  |      |   |               |               | Enteritidis (Predicted) | Enteritidis | 3776  | 33533 |
| SAL_BA5255AA | 32363-sc-2012-11-09T12:23: | ERR235291  |      |   |               |               | Enteritidis (Predicted) | Enteritidis | 3776  | 33196 |
| SAL_BA5256AA | 31353-sc-2012-11-09T12:23: | ERR235290  |      |   |               |               | Enteritidis (Predicted) | Enteritidis | 3776  | 33191 |
| SAL_BA5262AA | 36313-sc-2012-11-09T12:24: | ERR235354  |      |   |               |               | Enteritidis (Predicted) | Enteritidis | 3776  | 33529 |
| SAL_BA5263AA | 36343-sc-2012-11-09T12:24: | ERR235353  |      |   |               |               | Enteritidis (Predicted) | Enteritidis | 3776  | 33528 |
| SAL_BA5264AA | 36723-sc-2012-11-09T12:24: | ERR235352  |      |   |               |               | Enteritidis (Predicted) | Enteritidis | 3776  | 33507 |
| SAL_BA5265AA | 36803-sc-2012-11-09T12:24: | ERR235351  |      |   |               |               | Enteritidis (Predicted) | Enteritidis | 3776  | 33527 |

|              |                                     |            |      |    |               |               |                         |             |       |       |
|--------------|-------------------------------------|------------|------|----|---------------|---------------|-------------------------|-------------|-------|-------|
| SAL_BA5266AA | 35563-sc-2012-11-09T12:24:ERR235350 |            |      |    |               |               | Enteritidis (Predicted) | Enteritidis | 3776  | 33196 |
| SAL_BA5267AA | 35473-sc-2012-11-09T12:24:ERR235349 |            |      |    |               |               | Enteritidis (Predicted) | Enteritidis | 3776  | 33526 |
| SAL_BA5268AA | 35443-sc-2012-11-09T12:24:ERR235348 |            |      |    |               |               | Enteritidis (Predicted) | Enteritidis | 3776  | 33525 |
| SAL_BA5269AA | 35433-sc-2012-11-09T12:24:ERR235347 |            |      |    |               |               | Enteritidis (Predicted) | Enteritidis | 3776  | 33191 |
| SAL_BA5270AA | 35263-sc-2012-11-09T12:24:ERR235346 |            |      |    |               |               | Enteritidis (Predicted) | Enteritidis | 3776  | 33524 |
| SAL_BA5271AA | 35223-sc-2012-11-09T12:24:ERR235345 |            |      |    |               |               | Enteritidis (Predicted) | Enteritidis | 3776  | 33523 |
| SAL_BA5272AA | 35213-sc-2012-11-09T12:24:ERR235344 |            |      |    |               |               | Enteritidis (Predicted) | Enteritidis | 3776  | 33523 |
| SAL_BA5273AA | 35203-sc-2012-11-09T12:24:ERR235343 |            |      |    |               |               | Enteritidis (Predicted) | Enteritidis | 3776  | 33522 |
| SAL_BA5287AA | 34933-sc-2012-11-09T12:24:ERR235341 |            |      |    |               |               | Enteritidis (Predicted) | Enteritidis | 3776  | 33510 |
| SAL_BA5288AA | 34893-sc-2012-11-09T12:24:ERR235340 |            |      |    |               |               | Enteritidis (Predicted) | Enteritidis | 3776  | 33191 |
| SAL_BA5289AA | 34873-sc-2012-11-09T12:24:ERR235339 |            |      |    |               |               | Enteritidis (Predicted) | Enteritidis | 3776  | 33509 |
| SAL_BA5290AA | 34863-sc-2012-11-09T12:24:ERR235338 |            |      |    |               |               | Enteritidis (Predicted) | Enteritidis | 3776  | 33191 |
| SAL_BA5291AA | 34853-sc-2012-11-09T12:24:ERR235337 |            |      |    |               |               | Enteritidis (Predicted) | Enteritidis | 3776  | 33184 |
| SAL_BA5292AA | 34683-sc-2012-11-09T12:24:ERR235336 |            |      |    |               |               | Enteritidis (Predicted) | Enteritidis | 3776  | 33189 |
| SAL_BA5293AA | 34563-sc-2012-11-09T12:24:ERR235335 |            |      |    |               |               | Enteritidis (Predicted) | Enteritidis | 3776  | 33508 |
| SAL_BA5294AA | 34503-sc-2012-11-09T12:24:ERR235334 |            |      |    |               |               | Enteritidis (Predicted) | Enteritidis | 3776  | 33507 |
| SAL_BA5302AA | A53420-sc-2012-11-09T12:2:ERR235265 |            |      |    |               |               | Enteritidis (Predicted) | Enteritidis | 1424  | 33500 |
| SAL_BA5312AA | PNUSAS000211                        | SRR2015054 | 2015 | 2  | North America | United States | Enteritidis             | Enteritidis | 1425  | 1808  |
| SAL_BA5314AA | PNUSAS000210                        | SRR2015053 | 2015 | 2  | North America | United States | Enteritidis             | Enteritidis | 1425  | 33492 |
| SAL_BA5316AA | PNUSAS000209                        | SRR2015052 | 2015 | 1  | North America | United States | Enteritidis             | Enteritidis | 1425  | 1808  |
| SAL_BA5318AA | PNUSAS000203                        | SRR2015051 | 2014 | 12 | North America | United States | Enteritidis             | Enteritidis | 1425  | 2668  |
| SAL_BA5391AA | 3493-sc-2012-11-09T12:20:5ERR235117 |            |      |    |               |               | Enteritidis (Predicted) | Enteritidis | 3745  | 33435 |
| SAL_BA5393AA | A32229-sc-2012-11-09T12:2:ERR235116 |            |      |    |               |               | Enteritidis (Predicted) | Enteritidis | 1425  | 33433 |
| SAL_BA5395AA | A55767-sc-2012-11-09T12:2:ERR235115 |            |      |    |               |               | Enteritidis (Predicted) | Enteritidis | 1424  | 33284 |
| SAL_BA5397AA | A54341-sc-2012-11-09T12:2:ERR235114 |            |      |    |               |               | Enteritidis (Predicted) | Enteritidis | 1424  | 33283 |
| SAL_BA5400AA | D6007-sc-2012-11-09T12:20:ERR235113 |            |      |    |               |               | Enteritidis (Predicted) | Enteritidis | 1424  | 33428 |
| SAL_BA5402AA | A17787-sc-2012-11-09T12:2:ERR235112 |            |      |    |               |               | Enteritidis (Predicted) | Enteritidis | 1424  | 33427 |
| SAL_BA5404AA | 253-sc-2012-11-09T12:20:53ERR235111 |            |      |    |               |               | Enteritidis (Predicted) | Enteritidis | 1425  | 33236 |
| SAL_BA5406AA | D7419-sc-2012-11-09T12:20:ERR235110 |            |      |    |               |               | Enteritidis (Predicted) | Enteritidis | 1424  | 33424 |
| SAL_BA5408AA | A34142-sc-2012-11-09T12:2:ERR235109 |            |      |    |               |               | Enteritidis (Predicted) | Enteritidis | 1424  | 33422 |
| SAL_BA5410AA | A40882-sc-2012-11-09T12:2:ERR235108 |            |      |    |               |               | Enteritidis (Predicted) | Enteritidis | 1425  | 33421 |
| SAL_BA5412AA | A53601-sc-2012-11-09T12:2:ERR235107 |            |      |    |               |               | Enteritidis (Predicted) | Enteritidis | 1424  | 33419 |
| SAL_BA5414AA | A28721-sc-2012-11-09T12:2:ERR235106 |            |      |    |               |               | Enteritidis (Predicted) | Enteritidis | 1424  | 33418 |
| SAL_BA5483AA | 15MN00142                           | SRR2005756 | 2015 | 4  | North America | United States | Enteritidis             | Enteritidis | 27892 | 5650  |
| SAL_BA5523AA | FDA00001081                         | SRR2002724 | 2007 | 2  | Europe        | Hungary       | Enteritidis             | Enteritidis | 1425  | 33330 |
| SAL_BA5549AA | A39959-sc-2012-11-09T12:2:ERR235105 |            |      |    |               |               | Enteritidis (Predicted) | Enteritidis | 1424  | 33266 |
| SAL_BA5552AA | WAPHL_SAL-A00766                    | SRR2002487 | 2006 |    | North America | United States | Enteritidis             | Enteritidis | 1425  | 33308 |
| SAL_BA5556AA | 101-sc-2012-11-09T12:20:43ERR235102 |            |      |    |               |               | Enteritidis (Predicted) | Enteritidis | 3858  | 33305 |
| SAL_BA5566AA | 1971-sc-2012-11-09T12:22:1ERR235195 |            |      |    |               |               | Enteritidis (Predicted) | Enteritidis | 1425  | 33295 |
| SAL_BA5568AA | A41750-sc-2012-11-09T12:2:ERR235194 |            |      |    |               |               | Enteritidis (Predicted) | Enteritidis | 1425  | 33293 |
| SAL_BA5570AA | A35261-sc-2012-11-09T12:2:ERR235193 |            |      |    |               |               | Enteritidis (Predicted) | Enteritidis | 1424  | 33291 |
| SAL_BA5572AA | A45427-sc-2012-11-09T12:2:ERR235192 |            |      |    |               |               | Enteritidis (Predicted) | Enteritidis | 1425  | 33289 |
| SAL_BA5574AA | A36950-sc-2012-11-09T12:2:ERR235191 |            |      |    |               |               | Enteritidis (Predicted) | Enteritidis | 1424  | 33287 |
| SAL_BA5576AA | A53843-sc-2012-11-09T12:2:ERR235190 |            |      |    |               |               | Enteritidis (Predicted) | Enteritidis | 1424  | 33251 |
| SAL_BA5578AA | A7828-sc-2012-11-09T12:22:ERR235189 |            |      |    |               |               | Enteritidis (Predicted) | Enteritidis | 1424  | 33284 |
| SAL_BA5579AA | D17739-sc-2012-11-09T12:2:ERR235188 |            |      |    |               |               | Enteritidis (Predicted) | Enteritidis | 1424  | 33283 |
| SAL_BA5581AA | 8323-sc-2012-11-09T12:22:0ERR235187 |            |      |    |               |               | Enteritidis (Predicted) | Enteritidis | 3745  | 33281 |
| SAL_BA5583AA | A53742-sc-2012-11-09T12:2:ERR235186 |            |      |    |               |               | Enteritidis (Predicted) | Enteritidis | 1424  | 33279 |
| SAL_BA5587AA | A36678-sc-2012-11-09T12:2:ERR235184 |            |      |    |               |               | Enteritidis (Predicted) | Enteritidis | 1425  | 33275 |
| SAL_BA5589AA | A53811-sc-2012-11-09T12:2:ERR235183 |            |      |    |               |               | Enteritidis (Predicted) | Enteritidis | 1424  | 33273 |
| SAL_BA5594AA | A51073-sc-2012-11-09T12:2:ERR235181 |            |      |    |               |               | Enteritidis (Predicted) | Enteritidis | 1425  | 33257 |
| SAL_BA5596AA | 9486-sc-2012-11-09T12:21:5ERR235180 |            |      |    |               |               | Enteritidis (Predicted) | Enteritidis | 3858  | 33269 |
| SAL_BA5601AA | D16245-sc-2012-11-09T12:2:ERR235178 |            |      |    |               |               | Enteritidis (Predicted) | Enteritidis | 1424  | 33266 |
| SAL_BA5603AA | A31878-sc-2012-11-09T12:2:ERR235177 |            |      |    |               |               | Enteritidis (Predicted) | Enteritidis | 1424  | 33264 |
| SAL_BA5605AA | A46277-sc-2012-11-09T12:2:ERR235176 |            |      |    |               |               | Enteritidis (Predicted) | Enteritidis | 1424  | 33262 |
| SAL_BA5607AA | A36950-sc-2012-11-09T12:2:ERR235175 |            |      |    |               |               | Enteritidis (Predicted) | Enteritidis | 1425  | 33260 |
| SAL_BA5609AA | D54684-sc-2012-11-09T12:2:ERR235174 |            |      |    |               |               | Enteritidis (Predicted) | Enteritidis | 1425  | 33259 |
| SAL_BA5612AA | A54059-sc-2012-11-09T12:2:ERR235173 |            |      |    |               |               | Enteritidis (Predicted) | Enteritidis | 1425  | 33257 |
| SAL_BA5616AA | 7909-sc-2012-11-09T12:21:4ERR235171 |            |      |    |               |               | Enteritidis (Predicted) | Enteritidis | 1425  | 33253 |

|              |                            |            |      |   |  |               |               |                         |             |       |       |
|--------------|----------------------------|------------|------|---|--|---------------|---------------|-------------------------|-------------|-------|-------|
| SAL_BA5618AA | D11119-sc-2012-11-09T12:2  | ERR235170  |      |   |  |               |               | Enteritidis (Predicted) | Enteritidis | 1424  | 33251 |
| SAL_BA5620AA | A9215-sc-2012-11-09T12:21  | ERR235169  |      |   |  |               |               | Enteritidis (Predicted) | Enteritidis | 1424  | 33249 |
| SAL_BA5622AA | A31243-sc-2012-11-09T12:2  | ERR235168  |      |   |  |               |               | Enteritidis (Predicted) | Enteritidis | 1425  | 33247 |
| SAL_BA5624AA | A53016-sc-2012-11-09T12:2  | ERR235167  |      |   |  |               |               | Enteritidis (Predicted) | Enteritidis | 1424  | 33245 |
| SAL_BA5626AA | A56756-sc-2012-11-09T12:2  | ERR235166  |      |   |  |               |               | Enteritidis (Predicted) | Enteritidis | 1425  | 33243 |
| SAL_BA5629AA | A54595-sc-2012-11-09T12:2  | ERR235165  |      |   |  |               |               | Enteritidis (Predicted) | Enteritidis | 1425  | 33240 |
| SAL_BA5633AA | A51583-sc-2012-11-09T12:2  | ERR235163  |      |   |  |               |               | Enteritidis (Predicted) | Enteritidis | 1425  | 33236 |
| SAL_BA5636AA | 6567-sc-2012-11-09T12:21:4 | ERR235161  |      |   |  |               |               | Enteritidis (Predicted) | Enteritidis | 3815  | 33233 |
| SAL_BA5638AA | A12683-sc-2012-11-09T12:2  | ERR235160  |      |   |  |               |               | Enteritidis (Predicted) | Enteritidis | 1425  | 33232 |
| SAL_BA5640AA | D3558-sc-2012-11-09T12:21  | ERR235159  |      |   |  |               |               | Enteritidis (Predicted) | Enteritidis | 1424  | 33231 |
| SAL_BA5642AA | A30782-sc-2012-11-09T12:2  | ERR235158  |      |   |  |               |               | Enteritidis (Predicted) | Enteritidis | 1424  | 41495 |
| SAL_BA5645AA | 15MN00141                  | SRR1998979 | 2015 | 4 |  | North America | United States | Enteritidis             | Enteritidis | 1425  | 33228 |
| SAL_BA5646AA | A57601-sc-2012-11-09T12:2  | ERR235156  |      |   |  |               |               | Enteritidis (Predicted) | Enteritidis | 1425  | 41336 |
| SAL_BA5648AA | D43980-sc-2012-11-09T12:2  | ERR235155  |      |   |  |               |               | Enteritidis (Predicted) | Enteritidis | 1424  | 33226 |
| SAL_BA5650AA | A59040-sc-2012-11-09T12:2  | ERR235154  |      |   |  |               |               | Enteritidis (Predicted) | Enteritidis | 1424  | 33220 |
| SAL_BA5651AA | 15MN00140                  | SRR1998974 | 2015 | 4 |  | North America | United States | Enteritidis             | Enteritidis | 1425  | 33224 |
| SAL_BA5654AA | 34493-sc-2012-11-09T12:24  | ERR235333  |      |   |  |               |               | Enteritidis (Predicted) | Enteritidis | 3776  | 33222 |
| SAL_BA5656AA | A9086-sc-2012-11-09T12:21  | ERR235152  |      |   |  |               |               | Enteritidis (Predicted) | Enteritidis | 1424  | 33220 |
| SAL_BA5658AA | 3857-sc-2012-11-09T12:21:3 | ERR235151  |      |   |  |               |               | Enteritidis (Predicted) | Enteritidis | 1425  | 33218 |
| SAL_BA5659AA | CFSAN032481                | SRR1998969 | 2006 | 5 |  | South America | Argentina     | Enteritidis             | Enteritidis | 1425  | 33217 |
| SAL_BA5660AA | A12756-sc-2012-11-09T12:2  | ERR235150  |      |   |  |               |               | Enteritidis (Predicted) | Enteritidis | 1424  | 33216 |
| SAL_BA5662AA | A17698-sc-2012-11-09T12:2  | ERR235149  |      |   |  |               |               | Enteritidis (Predicted) | Enteritidis | 1424  | 33214 |
| SAL_BA5663AA | CFSAN032485                | SRR1998964 | 2006 | 1 |  | South America | Argentina     | Enteritidis             | Enteritidis | 1425  | 33213 |
| SAL_BA5664AA | A46756-sc-2012-11-09T12:2  | ERR235148  |      |   |  |               |               | Enteritidis (Predicted) | Enteritidis | 1425  | 33212 |
| SAL_BA5665AA | 15MN00133                  | SRR1998961 | 2015 | 4 |  | North America | United States | Enteritidis             | Enteritidis | 1425  | 33211 |
| SAL_BA5666AA | A34057-sc-2012-11-09T12:2  | ERR235147  |      |   |  |               |               | Enteritidis (Predicted) | Enteritidis | 1425  | 33210 |
| SAL_BA5668AA | A59024-sc-2012-11-09T12:2  | ERR235146  |      |   |  |               |               | Enteritidis (Predicted) | Enteritidis | 1425  | 33208 |
| SAL_BA5669AA | 15MN00139                  | SRR1998948 | 2015 | 4 |  | North America | United States | Enteritidis             | Enteritidis | 28627 | 33207 |
| SAL_BA5670AA | A48460-sc-2012-11-09T12:2  | ERR235145  |      |   |  |               |               | Enteritidis (Predicted) | Enteritidis | 1425  | 33206 |
| SAL_BA5671AA | CFSAN032487                | SRR1998947 | 2008 | 4 |  | South America | Argentina     | Enteritidis             | Enteritidis | 1425  | 33205 |
| SAL_BA5673AA | CFSAN032486                | SRR1998946 | 2009 | 2 |  | South America | Argentina     | Enteritidis             | Enteritidis | 1425  | 33203 |
| SAL_BA5675AA | CFSAN032482                | SRR1998945 | 2006 | 5 |  | South America | Argentina     | Enteritidis             | Enteritidis | 1425  | 33201 |
| SAL_BA5676AA | A7369-sc-2012-11-09T12:21  | ERR235142  |      |   |  |               |               | Enteritidis (Predicted) | Enteritidis | 1424  | 33200 |
| SAL_BA5677AA | 15MN00138                  | SRR1998943 | 2015 | 4 |  | North America | United States | Enteritidis             | Enteritidis | 1425  | 33199 |
| SAL_BA5678AA | 2702-sc-2012-11-09T12:21:2 | ERR235141  |      |   |  |               |               | Enteritidis (Predicted) | Enteritidis | 3858  | 33198 |
| SAL_BA5679AA | CFSAN032488                | SRR1998938 | 2008 | 4 |  | South America | Argentina     | Enteritidis             | Enteritidis | 1425  | 33197 |
| SAL_BA5680AA | 34483-sc-2012-11-09T12:24  | ERR235332  |      |   |  |               |               | Enteritidis (Predicted) | Enteritidis | 3776  | 33196 |
| SAL_BA5681AA | CFSAN030852                | SRR1997833 | 2012 |   |  | North America | United States | Enteritidis             | Enteritidis | 1425  | 33195 |
| SAL_BA5683AA | CFSAN030835                | SRR1997832 | 2012 |   |  | North America | United States | Enteritidis             | Enteritidis | 1425  | 33187 |
| SAL_BA5684AA | 34443-sc-2012-11-09T12:24  | ERR235330  |      |   |  |               |               | Enteritidis (Predicted) | Enteritidis | 3776  | 33194 |
| SAL_BA5686AA | 34423-sc-2012-11-09T12:24  | ERR235329  |      |   |  |               |               | Enteritidis (Predicted) | Enteritidis | 3776  | 33193 |
| SAL_BA5688AA | 34413-sc-2012-11-09T12:24  | ERR235328  |      |   |  |               |               | Enteritidis (Predicted) | Enteritidis | 3776  | 33191 |
| SAL_BA5690AA | 34403-sc-2012-11-09T12:24  | ERR235327  |      |   |  |               |               | Enteritidis (Predicted) | Enteritidis | 3776  | 33184 |
| SAL_BA5692AA | 34393-sc-2012-11-09T12:24  | ERR235326  |      |   |  |               |               | Enteritidis (Predicted) | Enteritidis | 3776  | 33189 |
| SAL_BA5694AA | 34253-sc-2012-11-09T12:24  | ERR235325  |      |   |  |               |               | Enteritidis (Predicted) | Enteritidis | 3776  | 33181 |
| SAL_BA5695AA | CFSAN030839                | SRR1997826 | 2012 |   |  | North America | United States | Enteritidis             | Enteritidis | 1425  | 33187 |
| SAL_BA5696AA | 34243-sc-2012-11-09T12:24  | ERR235324  |      |   |  |               |               | Enteritidis (Predicted) | Enteritidis | 3776  | 33186 |
| SAL_BA5697AA | CFSAN030827                | SRR1997825 | 2012 |   |  | North America | United States | Enteritidis             | Enteritidis | 1425  | 33185 |
| SAL_BA5698AA | 34233-sc-2012-11-09T12:24  | ERR235323  |      |   |  |               |               | Enteritidis (Predicted) | Enteritidis | 3776  | 33184 |
| SAL_BA5699AA | CFSAN030823                | SRR1997824 | 2012 |   |  | North America | United States | Enteritidis             | Enteritidis | 1425  | 33183 |
| SAL_BA5700AA | CFSAN030818                | SRR1997823 | 2012 |   |  | North America | United States | Enteritidis             | Enteritidis | 28629 | 33182 |
| SAL_BA5701AA | 34223-sc-2012-11-09T12:24  | ERR235322  |      |   |  |               |               | Enteritidis (Predicted) | Enteritidis | 3776  | 33181 |
| SAL_BA5702AA | CFSAN030816                | SRR1997822 | 2012 |   |  | North America | United States | Enteritidis             | Enteritidis | 1425  | 33180 |
| SAL_BA5703AA | 34193-sc-2012-11-09T12:24  | ERR235321  |      |   |  |               |               | Enteritidis (Predicted) | Enteritidis | 3776  | 33179 |
| SAL_BA5704AA | CFSAN030809                | SRR1997821 | 2012 |   |  | North America | United States | Enteritidis             | Enteritidis | 1425  | 33178 |
| SAL_BA5733AA | IEH-NGS-SAL-02584          | SRR1997806 | 2014 | 4 |  | North America | United States | Enteritidis (Predicted) | Enteritidis | 1425  | 33150 |
| SAL_BA5735AA | CFSAN031129                | SRR1997805 | 2014 | 4 |  | North America | United States | Enteritidis (Predicted) | Enteritidis | 1425  | 33148 |
| SAL_BA5741AA | CFSAN031153                | SRR1997802 | 2014 | 4 |  | North America | United States | Enteritidis (Predicted) | Enteritidis | 1425  | 33142 |
| SAL_BA5751AA | IEH-NGS-SAL-02574          | SRR1997797 | 2014 | 4 |  | North America | United States | Enteritidis (Predicted) | Enteritidis | 1425  | 33135 |

|              |                   |            |      |   |   |               |               |                         |             |       |       |
|--------------|-------------------|------------|------|---|---|---------------|---------------|-------------------------|-------------|-------|-------|
| SAL_BA5767AA | M273 / NCTC20088  | ERR230453  | 1938 | 9 | 7 |               |               | Moscow                  | Enteritidis | 3842  | 33119 |
| SAL_BA5778AA | CFSAN028988       | SRR1996245 | 2014 | 4 |   | North America | United States | Enteritidis (Predicted) | Enteritidis | 1425  | 33109 |
| SAL_BA5801AA | CFSAN028955       | SRR1996232 | 2014 | 4 |   | North America | United States | Enteritidis (Predicted) | Enteritidis | 27901 | 33086 |
| SAL_BA5811AA | CFSAN028927       | SRR1996227 | 2014 | 4 |   | North America | United States | Enteritidis (Predicted) | Enteritidis | 1425  | 33076 |
| SAL_BA5815AA | CFSAN031112       | SRR1996224 | 2014 | 4 |   | North America | United States | Enteritidis (Predicted) | Enteritidis | 1425  | 33072 |
| SAL_BA5823AA | CFSAN028963       | SRR1996219 | 2014 | 4 |   | North America | United States | Enteritidis (Predicted) | Enteritidis | 1425  | 33066 |
| SAL_BA5827AA | CFSAN028983       | SRR1996217 | 2014 | 4 |   | North America | United States | Enteritidis (Predicted) | Enteritidis | 1425  | 33062 |
| SAL_BA5833AA | IEH-NGS-SAL-02110 | SRR1996214 | 2014 | 4 |   | North America | United States | Enteritidis (Predicted) | Enteritidis | 1425  | 33056 |
| SAL_BA5835AA | CFSAN028971       | SRR1996213 | 2014 | 4 |   | North America | United States | Enteritidis (Predicted) | Enteritidis | 1425  | 33054 |
| SAL_BA5843AA | IEH-NGS-SAL-02581 | SRR1996209 | 2014 | 4 |   | North America | United States | Enteritidis (Predicted) | Enteritidis | 1425  | 33046 |
| SAL_BA5867AA | CFSAN028985       | SRR1996194 | 2014 | 4 |   | North America | United States | Enteritidis (Predicted) | Enteritidis | 1425  | 33024 |
| SAL_BA5876AA | IEH-NGS-SAL-02119 | SRR1996189 | 2014 | 4 |   | North America | United States | Enteritidis (Predicted) | Enteritidis | 1425  | 33015 |
| SAL_BA5880AA | M2 / NCTC20002    | ERR230374  | 1925 | 8 | 4 |               |               | Enteritidis             | Enteritidis | 1425  | 33011 |
| SAL_BA5885AA | FDA00001126       | SRR1996185 | 2007 | 6 |   | Asia          | China         | Enteritidis             | Enteritidis | 1425  | 33006 |
| SAL_BA5899AA | IEH-NGS-SAL-02075 | SRR1996178 | 2014 | 4 |   | North America | United States | Enteritidis (Predicted) | Enteritidis | 1425  | 32998 |
| SAL_BA5922AA | CFSAN028970       | SRR1996167 | 2014 | 4 |   | North America | United States | Enteritidis (Predicted) | Enteritidis | 1425  | 32986 |
| SAL_BA5960AA | CFSAN028992       | SRR1996145 | 2014 | 4 |   | North America | United States | Enteritidis (Predicted) | Enteritidis | 1425  | 32967 |
| SAL_BA5962AA | CFSAN028997       | SRR1996144 | 2014 | 4 |   | North America | United States | Enteritidis (Predicted) | Enteritidis | 1425  | 32966 |
| SAL_BA5982AA | CFSAN029002       | SRR1996134 | 2014 | 4 |   | North America | United States | Enteritidis (Predicted) | Enteritidis | 1425  | 32957 |
| SAL_BA6014AA | IEH-NGS-SAL-02135 | SRR1995741 | 2014 | 4 |   | North America | United States | Enteritidis (Predicted) | Enteritidis | 27904 | 32942 |
| SAL_BA6022AA | IEH-NGS-SAL-02116 | SRR1995737 | 2014 | 4 |   | North America | United States | Enteritidis (Predicted) | Enteritidis | 1425  | 32938 |
| SAL_BA6024AA | CFSAN031148       | SRR1995564 | 2014 | 4 |   | North America | United States | Enteritidis (Predicted) | Enteritidis | 1425  | 32937 |
| SAL_BA6034AA | CFSAN029004       | SRR1995558 | 2014 | 4 |   | North America | United States | Enteritidis (Predicted) | Enteritidis | 1425  | 32932 |
| SAL_BA6066AA | IEH-NGS-SAL-02593 | SRR1995539 | 2014 | 4 |   | North America | United States | Enteritidis (Predicted) | Enteritidis | 1425  | 32917 |
| SAL_BA6068AA | IEH-NGS-SAL-02113 | SRR1995538 | 2014 | 4 |   | North America | United States | Enteritidis (Predicted) | Enteritidis | 1425  | 32916 |
| SAL_BA6092AA | CFSAN028979       | SRR1995525 | 2014 | 4 |   | North America | United States | Enteritidis (Predicted) | Enteritidis | 1425  | 32906 |
| SAL_BA6098AA | CFSAN028986       | SRR1995522 | 2014 | 4 |   | North America | United States | Enteritidis (Predicted) | Enteritidis | 1425  | 32903 |
| SAL_BA6100AA | CFSAN031147       | SRR1995521 | 2014 | 4 |   | North America | United States | Enteritidis (Predicted) | Enteritidis | 1425  | 32901 |
| SAL_BA6112AA | CFSAN028962       | SRR1995515 | 2014 | 4 |   | North America | United States | Enteritidis (Predicted) | Enteritidis | 1425  | 32892 |
| SAL_BA6116AA | CFSAN028982       | SRR1995513 | 2014 | 4 |   | North America | United States | Enteritidis (Predicted) | Enteritidis | 1425  | 32889 |
| SAL_BA6126AA | CFSAN028999       | SRR1995508 | 2014 | 4 |   | North America | United States | Enteritidis (Predicted) | Enteritidis | 1425  | 32880 |
| SAL_BA6130AA | CFSAN028952       | SRR1995506 | 2014 | 4 |   | North America | United States | Enteritidis (Predicted) | Enteritidis | 1425  | 32878 |
| SAL_BA6133AA | CFSAN031120       | SRR1995504 | 2014 | 4 |   | North America | Canada        | Enteritidis (Predicted) | Enteritidis | 1425  | 32875 |
| SAL_BA6149AA | CFSAN028998       | SRR1995496 | 2014 | 4 |   | North America | United States | Enteritidis (Predicted) | Enteritidis | 1425  | 32862 |
| SAL_BA6155AA | 15MN00124         | SRR1988508 | 2015 | 3 |   | North America | United States | Enteritidis             | Enteritidis | 1425  | 32858 |
| SAL_BA6158AA | 15MN00097         | SRR1988507 | 2015 | 3 |   | North America | United States | Enteritidis             | Enteritidis | 1425  | 32855 |
| SAL_BA6166AA | 15MN00125         | SRR1988503 | 2015 | 3 |   | North America | United States | Enteritidis             | Enteritidis | 1425  | 32850 |
| SAL_BA6171AA | CFSAN031107       | SRR1988500 | 2014 | 4 |   | North America | United States | Enteritidis (Predicted) | Enteritidis | 1425  | 32846 |
| SAL_BA6175AA | CFSAN031093       | SRR1988498 | 2014 | 4 |   | North America | United States | Enteritidis (Predicted) | Enteritidis | 1425  | 32842 |
| SAL_BA6179AA | 15MN00132         | SRR1988496 | 2015 | 4 |   | North America | United States | Enteritidis             | Enteritidis | 1425  | 32838 |
| SAL_BA6181AA | 15MN00131         | SRR1988495 | 2015 | 4 |   | North America | United States | Enteritidis             | Enteritidis | 1425  | 32836 |
| SAL_BA6182AA | 15MN00122         | SRR1988494 | 2015 | 3 |   | North America | United States | Enteritidis             | Enteritidis | 1425  | 32835 |
| SAL_BA6184AA | 15MN00128         | SRR1988493 | 2015 | 3 |   | North America | United States | Enteritidis             | Enteritidis | 1425  | 32833 |
| SAL_BA6186AA | 15MN00112         | SRR1988492 | 2015 | 4 |   | North America | United States | Enteritidis             | Enteritidis | 1425  | 32831 |
| SAL_BA6188AA | 15MN00108         | SRR1988491 | 2015 | 3 |   | North America | United States | Enteritidis             | Enteritidis | 1425  | 32829 |
| SAL_BA6209AA | IEH-NGS-SAL-02561 | SRR1988480 | 2014 | 4 |   | North America | United States | Enteritidis (Predicted) | Enteritidis | 1425  | 32809 |
| SAL_BA6217AA | 15MN00127         | SRR1988476 | 2015 | 3 |   | North America | United States | Enteritidis             | Enteritidis | 1425  | 32801 |
| SAL_BA6226AA | CFSAN031087       | SRR1988471 | 2014 | 4 |   | North America | United States | Enteritidis (Predicted) | Enteritidis | 1425  | 32795 |
| SAL_BA6228AA | 15MN00120         | SRR1988470 | 2015 | 3 |   | North America | United States | Enteritidis             | Enteritidis | 1425  | 32793 |
| SAL_BA6247AA | 15MN00106         | SRR1988452 | 2015 | 3 |   | North America | United States | Enteritidis             | Enteritidis | 1425  | 32777 |
| SAL_BA6249AA | 15MN00099         | SRR1988450 | 2015 | 3 |   | North America | United States | Enteritidis             | Enteritidis | 1425  | 25745 |
| SAL_BA6266AA | CFSAN030770       | SRR1982236 | 2014 | 5 |   | North America | United States | Enteritidis (Predicted) | Enteritidis | 1425  | 32768 |
| SAL_BA6270AA | 15MN00111         | SRR1982234 | 2015 | 3 |   | North America | United States | Enteritidis             | Enteritidis | 1425  | 32764 |
| SAL_BA6291AA | CFSAN030753       | SRR1982222 | 2014 | 5 |   | North America | United States | Enteritidis (Predicted) | Enteritidis | 1425  | 32749 |
| SAL_BA6293AA | CFSAN030786       | SRR1982221 | 2014 | 5 |   | North America | United States | Enteritidis (Predicted) | Enteritidis | 1425  | 32445 |
| SAL_BA6305AA | IEH-NGS-SAL-02532 | SRR1982212 | 2014 | 5 |   | North America | United States | Enteritidis (Predicted) | Enteritidis | 1425  | 32737 |
| SAL_BA6324AA | 15MN00126         | SRR1982202 | 2015 | 3 |   | North America | United States | Enteritidis             | Enteritidis | 1425  | 32723 |
| SAL_BA6328AA | 15MN00135         | SRR1982197 | 2015 | 4 |   | North America | United States | Enteritidis             | Enteritidis | 1425  | 25745 |
| SAL_BA6344AA | 15MN00088         | SRR1982188 | 2015 | 2 |   | North America | United States | Enteritidis             | Enteritidis | 1425  | 32705 |

|              |                   |             |      |    |               |               |                         |             |       |       |
|--------------|-------------------|-------------|------|----|---------------|---------------|-------------------------|-------------|-------|-------|
| SAL_BA6351AA | 15MN00110         | SRR1982184  | 2015 | 4  | North America | United States | Enteritidis             | Enteritidis | 1425  | 32699 |
| SAL_BA6359AA | 15MN00070         | SRR1982180  | 2015 | 2  | North America | United States | Enteritidis             | Enteritidis | 1425  | 2668  |
| SAL_BA6372AA | 09:MF0001194R     | ERR161896   |      |    |               |               | Enteritidis (Predicted) | Enteritidis | 27167 | 32685 |
| SAL_BA6373AA | CFSAN031084       | SRR1982170  | 2014 | 4  | North America | United States | Enteritidis (Predicted) | Enteritidis | 1425  | 32684 |
| SAL_BA6374AA | CFSAN030769       | SRR1982169  | 2014 | 5  | North America | United States | Enteritidis (Predicted) | Enteritidis | 1425  | 32683 |
| SAL_BA6386AA | 15MN00105         | SRR1982162  | 2015 | 3  | North America | United States | Enteritidis             | Enteritidis | 1425  | 32672 |
| SAL_BA6390AA | CFSAN030777       | SRR1982159  | 2014 | 5  | North America | United States | Enteritidis (Predicted) | Enteritidis | 1425  | 32668 |
| SAL_BA6394AA | 15MN00071         | SRR1982157  | 2015 | 2  | North America | United States | Enteritidis             | Enteritidis | 1425  | 32664 |
| SAL_BA6396AA | 15MN00107         | SRR1982156  | 2015 | 3  | North America | United States | Enteritidis             | Enteritidis | 1425  | 12315 |
| SAL_BA6397AA | 15MN00098         | SRR1982155  | 2015 | 3  | North America | United States | Enteritidis             | Enteritidis | 28643 | 32662 |
| SAL_BA6399AA | 15MN00091         | SRR1982154  | 2015 | 3  | North America | United States | Enteritidis             | Enteritidis | 1425  | 32660 |
| SAL_BA6403AA | 15MN00089         | SRR1982152  | 2015 | 3  | North America | United States | Enteritidis             | Enteritidis | 1425  | 32658 |
| SAL_BA6408AA | 15MN00121         | SRR1982149  | 2015 | 3  | North America | United States | Enteritidis             | Enteritidis | 1425  | 32653 |
| SAL_BA6420AA | 15MN00109         | SRR1982142  | 2015 | 4  | North America | United States | Enteritidis             | Enteritidis | 1425  | 32643 |
| SAL_BA6433AA | FLUFL-1483        | SRR1982134  | 2003 | 6  | North America | United States | Enteritidis (Predicted) | Enteritidis | 1425  | 32632 |
| SAL_BA6436AA | CFSAN030752       | SRR1982131  | 2014 | 5  | North America | United States | Enteritidis (Predicted) | Enteritidis | 1425  | 32630 |
| SAL_BA6440AA | 15MN00137         | SRR1982128  | 2015 | 4  | North America | United States | Enteritidis             | Enteritidis | 1425  | 32627 |
| SAL_BA6449AA | 15MN00092         | SRR1982124  | 2015 | 3  | North America | United States | Enteritidis             | Enteritidis | 1425  | 32619 |
| SAL_BA6451AA | 15MN00068         | SRR1982123  | 2015 | 2  | North America | United States | Enteritidis             | Enteritidis | 1425  | 32617 |
| SAL_BA6455AA | 15MN00123         | SRR1982120  | 2015 | 3  | North America | United States | Enteritidis             | Enteritidis | 1425  | 32614 |
| SAL_BA6457AA | 15MN00100         | SRR1982119  | 2015 | 3  | North America | United States | Enteritidis             | Enteritidis | 1425  | 32613 |
| SAL_BA6463AA | CFSAN030754       | SRR1982116  | 2014 | 5  | North America | United States | Enteritidis (Predicted) | Enteritidis | 1425  | 32607 |
| SAL_BA6465AA | CFSAN030751       | SRR1982115  | 2014 | 5  | North America | United States | Enteritidis (Predicted) | Enteritidis | 1425  | 32605 |
| SAL_BA6475AA | CFSAN030790       | SRR1982056  | 2014 | 5  | North America | United States | Enteritidis (Predicted) | Enteritidis | 1425  | 32599 |
| SAL_BA6478AA | 15MN00134         | SRR1982053  | 2015 | 4  | North America | United States | Enteritidis             | Enteritidis | 1425  | 32596 |
| SAL_BA6482AA | CFSAN030791       | SRR1982051  | 2014 | 5  | North America | United States | Enteritidis (Predicted) | Enteritidis | 1425  | 32592 |
| SAL_BA6484AA | IEH-NGS-SAL-02531 | SRR1982049  | 2014 | 5  | North America | United States | Enteritidis (Predicted) | Enteritidis | 1425  | 32590 |
| SAL_BA6486AA | IEH-NGS-SAL-02524 | SRR1982048  | 2014 | 5  | North America | United States | Enteritidis (Predicted) | Enteritidis | 1425  | 32588 |
| SAL_BA6488AA | 15MN00104         | SRR1982046  | 2015 | 3  | North America | United States | Enteritidis             | Enteritidis | 1425  | 32586 |
| SAL_BA6495AA | IEH-NGS-SAL-02536 | SRR1982035  | 2014 | 5  | North America | United States | Enteritidis (Predicted) | Enteritidis | 1425  | 32579 |
| SAL_BA6501AA | 15MN00136         | SRR1982031  | 2015 | 4  | North America | United States | Enteritidis             | Enteritidis | 1425  | 25745 |
| SAL_BA6502AA | 15MN00130         | SRR1982030  | 2015 | 4  | North America | United States | Enteritidis             | Enteritidis | 1425  | 25754 |
| SAL_BA6545AA | 15MN00069         | SRR19800625 | 2015 | 2  | North America | United States | Enteritidis             | Enteritidis | 1425  | 22169 |
| SAL_BA6569AA | 15MN00090         | SRR1980609  | 2015 | 2  | North America | United States | Enteritidis             | Enteritidis | 1425  | 32517 |
| SAL_BA6595AA | CFSAN030750       | SRR1979268  | 2014 | 5  | North America | United States | Enteritidis (Predicted) | Enteritidis | 1425  | 32493 |
| SAL_BA6616AA | CFSAN030743       | SRR1976272  | 2014 | 5  | North America | United States | Enteritidis (Predicted) | Enteritidis | 1425  | 32475 |
| SAL_BA6646AA | CFSAN030735       | SRR1976254  | 2014 | 5  | North America | United States | Enteritidis (Predicted) | Enteritidis | 1425  | 32450 |
| SAL_BA6654AA | IEH-NGS-SAL-02490 | SRR1976249  | 2014 | 5  | North America | United States | Enteritidis (Predicted) | Enteritidis | 1425  | 32445 |
| SAL_BA6656AA | IEH-NGS-SAL-02481 | SRR1976248  | 2014 | 5  | North America | United States | Enteritidis (Predicted) | Enteritidis | 1425  | 32443 |
| SAL_BA6658AA | IEH-NGS-SAL-02480 | SRR1976247  | 2014 | 5  | North America | United States | Enteritidis (Predicted) | Enteritidis | 1425  | 32441 |
| SAL_BA6662AA | IEH-NGS-SAL-02489 | SRR1976241  | 2014 | 5  | North America | United States | Enteritidis (Predicted) | Enteritidis | 1425  | 32437 |
| SAL_BA6666AA | IEH-NGS-SAL-02482 | SRR1976239  | 2014 | 5  | North America | United States | Enteritidis (Predicted) | Enteritidis | 1425  | 32433 |
| SAL_BA6676AA | 09:MF0013408R     | ERR160952   |      |    |               |               | Enteritidis (Predicted) | Enteritidis | 1425  | 32425 |
| SAL_BA6677AA | IEH-NGS-SAL-02477 | SRR1976234  | 2014 | 5  | North America | United States | Enteritidis (Predicted) | Enteritidis | 1425  | 14319 |
| SAL_BA6681AA | IEH-NGS-SAL-02471 | SRR1976232  | 2014 | 5  | North America | United States | Enteritidis (Predicted) | Enteritidis | 1425  | 32421 |
| SAL_BA6731AA | WAPHL_SAL-A00895  | SRR1974121  | 2015 | 2  | North America | United States | Enteritidis             | Enteritidis | 1425  | 32376 |
| SAL_BA6733AA | CFSAN030268       | SRR1974120  | 2014 | 4  | North America | United States | Enteritidis (Predicted) | Enteritidis | 1425  | 32374 |
| SAL_BA6737AA | WAPHL_SAL-A00886  | SRR1974114  | 2014 | 12 | North America | United States | Enteritidis             | Enteritidis | 1425  | 32370 |
| SAL_BA6771AA | WAPHL_SAL-A00733  | SRR1974084  | 2006 |    | North America | United States | Enteritidis             | Enteritidis | 1425  | 32340 |
| SAL_BA6800AA | WAPHL_SAL-A00891  | SRR1974026  | 2015 | 1  | North America | United States | Enteritidis             | Enteritidis | 1425  | 32312 |
| SAL_BA6897AA | CFSAN030267       | SRR1973969  | 2014 | 4  | North America | United States | Enteritidis (Predicted) | Enteritidis | 1425  | 32222 |
| SAL_BA6914AA | WAPHL_SAL-A00888  | SRR1973913  | 2014 | 12 | North America | United States | Enteritidis             | Enteritidis | 8003  | 32211 |
| SAL_BA6941AA | WAPHL_SAL-A00887  | SRR1973896  | 2014 | 12 | North America | United States | Enteritidis             | Enteritidis | 1425  | 22715 |
| SAL_BA6951AA | CFSAN030695       | SRR1973888  | 2014 | 5  | North America | United States | Enteritidis (Predicted) | Enteritidis | 28670 | 32182 |
| SAL_BA6959AA | IEH-NGS-SAL-02381 | SRR1973883  | 2014 | 4  | North America | United States | Enteritidis (Predicted) | Enteritidis | 1425  | 32174 |
| SAL_BA6978AA | CFSAN030276       | SRR1973851  | 2014 | 4  | North America | United States | Enteritidis (Predicted) | Enteritidis | 1425  | 32157 |
| SAL_BA6980AA | IEH-NGS-SAL-02454 | SRR1973848  | 2014 | 5  | North America | United States | Enteritidis (Predicted) | Enteritidis | 1425  | 32155 |
| SAL_BA6988AA | WAPHL_SAL-A00885  | SRR1973841  | 2014 | 12 | North America | United States | Enteritidis             | Enteritidis | 1425  | 32148 |
| SAL_BA7036AA | CFSAN030292       | SRR1973808  | 2014 | 4  | North America | United States | Enteritidis (Predicted) | Enteritidis | 1425  | 32111 |

|              |                             |            |      |    |               |                |                         |             |       |       |
|--------------|-----------------------------|------------|------|----|---------------|----------------|-------------------------|-------------|-------|-------|
| SAL_BA7187AA | CFSAN030286                 | SRR1973798 | 2014 | 4  | North America | United States  | Enteritidis (Predicted) | Enteritidis | 1425  | 32009 |
| SAL_BA7196AA | IEH-NGS-SAL-02357           | SRR1973792 | 2014 | 4  | North America | United States  | Enteritidis (Predicted) | Enteritidis | 1425  | 32006 |
| SAL_BA7204AA | WAPHL_SAL-A00890            | SRR1973786 | 2015 | 1  | North America | United States  | Enteritidis             | Enteritidis | 1425  | 32003 |
| SAL_BA7223AA | WAPHL_SAL-A00896            | SRR1973776 | 2015 | 2  | North America | United States  | Enteritidis             | Enteritidis | 1425  | 31994 |
| SAL_BA7241AA | IEH-NGS-SAL-02467           | SRR1973761 | 2014 | 5  | North America | United States  | Enteritidis (Predicted) | Enteritidis | 1425  | 31982 |
| SAL_BA7262AA | CFSAN030279                 | SRR1973743 | 2014 | 4  | North America | United States  | Enteritidis (Predicted) | Enteritidis | 1425  | 31970 |
| SAL_BA7279AA | IEH-NGS-SAL-02458           | SRR1973728 | 2014 | 5  | North America | United States  | Enteritidis (Predicted) | Enteritidis | 28670 | 31962 |
| SAL_BA7286AA | CFSAN030697                 | SRR1973717 | 2014 | 5  | North America | United States  | Enteritidis (Predicted) | Enteritidis | 1425  | 31958 |
| SAL_BA7292AA | WAPHL_SAL-A00892            | SRR1973712 | 2015 | 1  | North America | United States  | Enteritidis             | Enteritidis | 1425  | 31956 |
| SAL_BA7294AA | WAPHL_SAL-A00884            | SRR1973711 | 2014 | 12 | North America | United States  | Enteritidis             | Enteritidis | 1425  | 31955 |
| SAL_BA7301AA | CFSAN030709                 | SRR1973704 | 2014 | 5  | North America | United States  | Enteritidis (Predicted) | Enteritidis | 1425  | 31950 |
| SAL_BA7313AA | WAPHL_SAL-A00894            | SRR1973698 | 2015 | 1  | North America | United States  | Enteritidis             | Enteritidis | 1425  | 31940 |
| SAL_BA7315AA | CFSAN030295                 | SRR1973697 | 2014 | 4  | North America | United States  | Enteritidis (Predicted) | Enteritidis | 1425  | 31938 |
| SAL_BA7316AA | MF19031                     | ERR048521  | 2009 |    | Europe        | United Kingdom | Enteritidis             | Enteritidis | 1425  | 31937 |
| SAL_BA7317AA | MF17654                     | ERR048520  | 2009 |    | Europe        | United Kingdom | Enteritidis             | Enteritidis | 1425  | 41328 |
| SAL_BA7319AA | 09:MF0017735R               | ERR048519  | 2009 |    | Europe        | United Kingdom | Enteritidis             | Enteritidis | 1425  | 31935 |
| SAL_BA7321AA | 09:MF0021482R               | ERR048518  | 2009 |    | Europe        | United Kingdom | Enteritidis             | Enteritidis | 1425  | 31934 |
| SAL_BA7325AA | 09:MF0018182R               | ERR048516  | 2009 |    | Europe        | United Kingdom | Enteritidis             | Enteritidis | 1425  | 41327 |
| SAL_BA7328AA | 09:MF0011240R               | ERR048514  | 2009 |    | Europe        | United Kingdom | Enteritidis             | Enteritidis | 1425  | 31931 |
| SAL_BA7331AA | WAPHL_SAL-A00889            | SRR1973686 | 2014 | 12 | North America | United States  | Enteritidis             | Enteritidis | 1425  | 31928 |
| SAL_BA7332AA | 09:MF0005148R               | ERR048512  | 2009 |    | Europe        | United Kingdom | Enteritidis             | Enteritidis | 1425  | 31927 |
| SAL_BA7334AA | 09:MF0000575R               | ERR048511  | 2009 |    | Europe        | United Kingdom | Enteritidis             | Enteritidis | 1425  | 31925 |
| SAL_BA7340AA | 08:MF0011943R               | ERR048508  | 2008 |    | Europe        | United Kingdom | Enteritidis             | Enteritidis | 1425  | 31921 |
| SAL_BA7351AA | 05:MB7981                   | ERR048502  | 2005 |    | Europe        | United Kingdom | Enteritidis             | Enteritidis | 1425  | 31915 |
| SAL_BA7359AA | CFSAN030294                 | SRR1973651 | 2014 | 4  | North America | United States  | Enteritidis (Predicted) | Enteritidis | 1425  | 31910 |
| SAL_BA7362AA | CFSAN030704                 | SRR1973643 | 2014 | 5  | North America | United States  | Enteritidis (Predicted) | Enteritidis | 1425  | 31907 |
| SAL_BA7393AA | PNUSAS000208                | SRR1970632 | 2015 | 1  | North America | United States  | Enteritidis             | Enteritidis | 1425  | 31878 |
| SAL_BA7394AA | PNUSAS000207                | SRR1970631 | 2015 | 1  | North America | United States  | Enteritidis             | Enteritidis | 1425  | 31879 |
| SAL_BA7395AA | PNUSAS000206                | SRR1970630 | 2015 | 1  | North America | United States  | Enteritidis             | Enteritidis | 1425  | 31877 |
| SAL_BA7396AA | PNUSAS000205                | SRR1970629 |      |    | North America | United States  | Enteritidis (Predicted) | Enteritidis | 1425  | 31876 |
| SAL_BA7397AA | PNUSAS000204                | SRR1970628 |      |    | North America | United States  | Enteritidis (Predicted) | Enteritidis | 1425  | 31875 |
| SAL_BA7398AA | PNUSAS000202                | SRR1970627 |      |    | North America | United States  | Enteritidis (Predicted) | Enteritidis | 1425  | 31874 |
| SAL_BA7399AA | PNUSAS000198                | SRR1970602 | 2015 | 2  | North America | United States  | Enteritidis             | Enteritidis | 1425  | 8621  |
| SAL_BA7400AA | PNUSAS000197                | SRR1970601 | 2015 | 2  | North America | United States  | Enteritidis             | Enteritidis | 1425  | 31873 |
| SAL_BA7422AA | CFSAN030700                 | SRR1970578 | 2014 | 5  | North America | United States  | Enteritidis (Predicted) | Enteritidis | 1425  | 31855 |
| SAL_BA7439AA | 56107                       | SRR1970324 | 2014 | 9  | Europe        | United Kingdom | Enteritidis             | Enteritidis | 1425  | 28844 |
| SAL_BA7442AA | 46581                       | SRR1970321 | 2014 | 7  | 18 Europe     | United Kingdom | Enteritidis             | Enteritidis | 3888  | 31840 |
| SAL_BA7443AA | 53001                       | SRR1970320 | 2014 | 10 | Europe        | United Kingdom | Enteritidis             | Enteritidis | 1425  | 31839 |
| SAL_BA7447AA | 50850                       | SRR1970316 | 2014 | 9  | Europe        | United Kingdom | Enteritidis             | Enteritidis | 1425  | 24766 |
| SAL_BA7461AA | 38345                       | SRR1970302 | 2014 | 7  | 28 Europe     | United Kingdom | Enteritidis             | Enteritidis | 3888  | 7153  |
| SAL_BA7469AA | 37824                       | SRR1970294 | 2014 | 7  | 27 Europe     | United Kingdom | Enteritidis             | Enteritidis | 3888  | 2066  |
| SAL_BA7472AA | 3734                        | SRR1970291 | 2014 | 4  | Europe        | United Kingdom | Enteritidis             | Enteritidis | 1425  | 31815 |
| SAL_BA7479AA | 29391                       | SRR1970288 | 2014 | 7  | 14 Europe     | United Kingdom | Enteritidis             | Enteritidis | 3888  | 31812 |
| SAL_BA7489AA | 21769                       | SRR1970283 | 2014 | 6  | Europe        | United Kingdom | Enteritidis             | Enteritidis | 1425  | 31807 |
| SAL_BA7492AA | Salmonella_enteritidis_D247 | ERR064832  |      |    |               |                | Enteritidis             | Enteritidis | 1425  | 41323 |
| SAL_BA7498AA | 25000                       | SRR1970279 | 2014 | 7  | Europe        | United Kingdom | Enteritidis             | Enteritidis | 1425  | 31802 |
| SAL_BA7499AA | 38429                       | SRR1970278 | 2014 | 8  | Europe        | United Kingdom | Enteritidis             | Enteritidis | 1425  | 31801 |
| SAL_BA7511AA | 55589                       | SRR1970271 | 2014 | 9  | Europe        | United Kingdom | Enteritidis             | Enteritidis | 3888  | 31791 |
| SAL_BA7588AA | 80576                       | SRR1970232 | 2015 | 1  | Europe        | United Kingdom | Enteritidis             | Enteritidis | 1425  | 25808 |
| SAL_BA7590AA | 93574                       | SRR1970231 | 2015 | 3  | Europe        | United Kingdom | Enteritidis             | Enteritidis | 1425  | 6932  |
| SAL_BA7598AA | 12140                       | SRR1970227 | 2014 | 5  | Europe        | United Kingdom | Enteritidis             | Enteritidis | 1425  | 31755 |
| SAL_BA7600AA | 46584                       | SRR1970226 | 2014 | 7  | 17 Europe     | United Kingdom | Enteritidis             | Enteritidis | 3888  | 31754 |
| SAL_BA7602AA | 25274                       | SRR1970225 | 2014 | 7  | Europe        | United Kingdom | Enteritidis             | Enteritidis | 1425  | 31753 |
| SAL_BA7611AA | 31927                       | SRR1970220 | 2014 | 7  | 22 Europe     | United Kingdom | Enteritidis             | Enteritidis | 3888  | 2066  |
| SAL_BA7620AA | 9179                        | SRR1970216 | 2014 | 5  | Europe        | United Kingdom | Enteritidis             | Enteritidis | 1425  | 31744 |
| SAL_BA7626AA | 93573                       | SRR1970213 | 2015 | 3  | Europe        | United Kingdom | Enteritidis             | Enteritidis | 1425  | 31741 |
| SAL_BA7630AA | 63876                       | SRR1970211 | 2014 | 11 | Europe        | United Kingdom | Enteritidis             | Enteritidis | 1425  | 24879 |
| SAL_BA7653AA | 50862                       | SRR1970200 | 2014 | 9  | Europe        | United Kingdom | Enteritidis             | Enteritidis | 1425  | 31726 |
| SAL_BA7675AA | 57104                       | SRR1970189 | 2014 | 8  | Europe        | United Kingdom | Enteritidis             | Enteritidis | 3888  | 31713 |

|              |       |            |      |    |           |                |                         |             |       |       |
|--------------|-------|------------|------|----|-----------|----------------|-------------------------|-------------|-------|-------|
| SAL_BA7677AA | 73051 | SRR1970188 | 2014 | 11 | Europe    | United Kingdom | Enteritidis (Predicted) | Enteritidis | 1425  | 31711 |
| SAL_BA7685AA | 63751 | SRR1970184 | 2014 | 10 | Europe    | United Kingdom | Enteritidis             | Enteritidis | 1425  | 31583 |
| SAL_BA7689AA | 37830 | SRR1970182 | 2014 | 7  | 30 Europe | United Kingdom | Enteritidis             | Enteritidis | 3888  | 31707 |
| SAL_BA7695AA | 34182 | SRR1970179 | 2014 | 7  | 24 Europe | United Kingdom | Enteritidis             | Enteritidis | 3888  | 31704 |
| SAL_BA7706AA | 37116 | SRR1970173 | 2014 | 8  | Europe    | United Kingdom | Enteritidis             | Enteritidis | 1425  | 31697 |
| SAL_BA7725AA | 31981 | SRR1970163 | 2014 | 7  | 25 Europe | United Kingdom | Enteritidis             | Enteritidis | 3888  | 2066  |
| SAL_BA7731AA | 14896 | SRR1970160 | 2014 | 5  | Europe    | United Kingdom | Enteritidis             | Enteritidis | 3888  | 31684 |
| SAL_BA7737AA | 91895 | SRR1970157 | 2014 | 9  | Europe    | United Kingdom | Enteritidis             | Enteritidis | 3888  | 31681 |
| SAL_BA7739AA | 95025 | SRR1970156 | 2015 | 3  | 11 Europe | United Kingdom | Enteritidis             | Enteritidis | 1425  | 31680 |
| SAL_BA7752AA | 62996 | SRR1970150 | 2014 | 9  | Europe    | United Kingdom | Enteritidis             | Enteritidis | 1425  | 31676 |
| SAL_BA7756AA | 53122 | SRR1970148 | 2014 | 9  | Europe    | United Kingdom | Enteritidis             | Enteritidis | 1425  | 25062 |
| SAL_BA7766AA | 31970 | SRR1970143 | 2014 | 7  | Europe    | United Kingdom | Enteritidis             | Enteritidis | 1425  | 31670 |
| SAL_BA7768AA | 63923 | SRR1970142 | 2014 | 11 | 6 Europe  | United Kingdom | Enteritidis             | Enteritidis | 1425  | 31669 |
| SAL_BA7770AA | 39446 | SRR1970141 | 2014 | 7  | 12 Europe | United Kingdom | Enteritidis             | Enteritidis | 3888  | 31668 |
| SAL_BA7782AA | 51253 | SRR1970135 | 2014 | 9  | Europe    | United Kingdom | Enteritidis             | Enteritidis | 1425  | 31659 |
| SAL_BA7786AA | 38349 | SRR1970133 | 2014 | 7  | 27 Europe | United Kingdom | Enteritidis             | Enteritidis | 3888  | 31658 |
| SAL_BA7790AA | 32392 | SRR1970131 | 2014 | 7  | 25 Europe | United Kingdom | Enteritidis             | Enteritidis | 1425  | 31656 |
| SAL_BA7792AA | 61847 | SRR1970130 | 2014 | 10 | Europe    | United Kingdom | Enteritidis             | Enteritidis | 3888  | 31655 |
| SAL_BA7794AA | 37806 | SRR1970129 | 2014 | 7  | 30 Europe | United Kingdom | Enteritidis             | Enteritidis | 3888  | 31654 |
| SAL_BA7798AA | 89899 | SRR1970127 | 2015 | 2  | Europe    | United Kingdom | Enteritidis             | Enteritidis | 1425  | 31651 |
| SAL_BA7801AA | 38774 | SRR1970126 | 2014 | 8  | Europe    | United Kingdom | Enteritidis             | Enteritidis | 3888  | 31649 |
| SAL_BA7808AA | 63581 | SRR1970123 | 2014 | 9  | Europe    | United Kingdom | Enteritidis             | Enteritidis | 1425  | 31642 |
| SAL_BA7816AA | 63737 | SRR1970119 | 2014 | 10 | Europe    | United Kingdom | Enteritidis             | Enteritidis | 1425  | 31635 |
| SAL_BA7824AA | 61835 | SRR1970115 | 2014 | 10 | Europe    | United Kingdom | Enteritidis             | Enteritidis | 1425  | 31629 |
| SAL_BA7853AA | 5924  | SRR1970098 | 2014 | 4  | Europe    | United Kingdom | Enteritidis             | Enteritidis | 1425  | 31602 |
| SAL_BA7855AA | 9246  | SRR1970097 | 2014 | 4  | Europe    | United Kingdom | Enteritidis             | Enteritidis | 1425  | 31600 |
| SAL_BA7863AA | 52994 | SRR1970093 | 2014 | 10 | Europe    | United Kingdom | Enteritidis             | Enteritidis | 1425  | 31593 |
| SAL_BA7873AA | 68671 | SRR1970088 | 2014 | 11 | Europe    | United Kingdom | Enteritidis             | Enteritidis | 27885 | 26868 |
| SAL_BA7877AA | 63704 | SRR1970086 | 2014 | 10 | Europe    | United Kingdom | Enteritidis             | Enteritidis | 1425  | 31583 |
| SAL_BA7885AA | 38410 | SRR1970082 | 2014 | 8  | 1 Europe  | United Kingdom | Enteritidis             | Enteritidis | 3888  | 31578 |
| SAL_BA7899AA | 94261 | SRR1970075 | 2015 | 3  | Europe    | United Kingdom | Enteritidis             | Enteritidis | 1425  | 2163  |
| SAL_BA7907AA | 57153 | SRR1970071 | 2014 | 10 | Europe    | United Kingdom | Enteritidis             | Enteritidis | 1425  | 31569 |
| SAL_BA7914AA | 96919 | SRR1970066 | 2015 | 3  | Europe    | United Kingdom | Enteritidis             | Enteritidis | 1425  | 31566 |
| SAL_BA7920AA | 39483 | SRR1970062 | 2014 | 8  | Europe    | United Kingdom | Enteritidis             | Enteritidis | 1425  | 31564 |
| SAL_BA7929AA | 9463  | SRR1970058 | 2014 | 4  | Europe    | United Kingdom | Enteritidis             | Enteritidis | 1425  | 31560 |
| SAL_BA7941AA | 76002 | SRR1970052 | 2014 | 12 | Europe    | United Kingdom | Enteritidis             | Enteritidis | 1425  | 31553 |
| SAL_BA7953AA | 45589 | SRR1970046 | 2014 | 9  | Europe    | United Kingdom | Enteritidis             | Enteritidis | 1425  | 31545 |
| SAL_BA7957AA | 25340 | SRR1970044 | 2014 | 7  | Europe    | United Kingdom | Enteritidis             | Enteritidis | 1425  | 31541 |
| SAL_BA7961AA | 57158 | SRR1970042 | 2014 | 10 | Europe    | United Kingdom | Enteritidis             | Enteritidis | 1425  | 31538 |
| SAL_BA7972AA | 34174 | SRR1970036 | 2014 | 7  | Europe    | United Kingdom | Enteritidis             | Enteritidis | 3888  | 2007  |
| SAL_BA7980AA | 37107 | SRR1970032 | 2014 | 8  | Europe    | United Kingdom | Enteritidis             | Enteritidis | 1425  | 31530 |
| SAL_BA8003AA | 23445 | SRR1970021 | 2014 | 5  | Europe    | United Kingdom | Enteritidis             | Enteritidis | 26481 | 31519 |
| SAL_BA8008AA | 65127 | SRR1970018 | 2014 | 11 | Europe    | United Kingdom | Enteritidis             | Enteritidis | 1425  | 24563 |
| SAL_BA8017AA | 38773 | SRR1970014 | 2014 | 8  | 7 Europe  | United Kingdom | Enteritidis             | Enteritidis | 3888  | 31511 |
| SAL_BA8024AA | 37804 | SRR1970011 | 2014 | 8  | Europe    | United Kingdom | Enteritidis             | Enteritidis | 1425  | 31508 |
| SAL_BA8054AA | 68673 | SRR1969997 | 2014 | 11 | Europe    | United Kingdom | Enteritidis             | Enteritidis | 1425  | 26123 |
| SAL_BA8060AA | 27796 | SRR1969994 | 2014 | 7  | Europe    | United Kingdom | Enteritidis             | Enteritidis | 1425  | 31492 |
| SAL_BA8068AA | 39511 | SRR1969990 | 2014 | 8  | Europe    | United Kingdom | Enteritidis             | Enteritidis | 1425  | 31487 |
| SAL_BA8072AA | 68688 | SRR1969988 | 2014 | 11 | Europe    | United Kingdom | Enteritidis             | Enteritidis | 3888  | 2007  |
| SAL_BA8078AA | 68654 | SRR1969985 | 2014 | 11 | Europe    | United Kingdom | Enteritidis             | Enteritidis | 1425  | 25341 |
| SAL_BA8083AA | 13400 | SRR1969982 | 2014 | 5  | Europe    | United Kingdom | Enteritidis             | Enteritidis | 1425  | 31481 |
| SAL_BA8086AA | 91293 | SRR1969981 | 2015 | 2  | Europe    | United Kingdom | Enteritidis             | Enteritidis | 1425  | 23956 |
| SAL_BA8092AA | 34193 | SRR1969978 | 2014 | 7  | Europe    | United Kingdom | Enteritidis             | Enteritidis | 1425  | 31478 |
| SAL_BA8097AA | 38373 | SRR1969976 | 2014 | 8  | Europe    | United Kingdom | Enteritidis             | Enteritidis | 1425  | 31477 |
| SAL_BA8127AA | 39487 | SRR1969962 | 2014 | 8  | Europe    | United Kingdom | Enteritidis             | Enteritidis | 3888  | 31463 |
| SAL_BA8133AA | 63632 | SRR1969959 | 2014 | 10 | Europe    | United Kingdom | Enteritidis             | Enteritidis | 1425  | 24879 |
| SAL_BA8137AA | 51257 | SRR1969957 | 2014 | 9  | Europe    | United Kingdom | Enteritidis             | Enteritidis | 1425  | 27930 |
| SAL_BA8150AA | 32467 | SRR1969951 | 2014 | 7  | 19 Europe | United Kingdom | Enteritidis             | Enteritidis | 3888  | 31456 |
| SAL_BA8167AA | 63762 | SRR1969943 | 2014 | 10 | Europe    | United Kingdom | Enteritidis             | Enteritidis | 26142 | 31450 |



|              |            |            |      |    |               |                |             |             |       |       |
|--------------|------------|------------|------|----|---------------|----------------|-------------|-------------|-------|-------|
| SAL_BA8173AA | 83727      | SRR1969940 | 2015 | 1  | Europe        | United Kingdom | Enteritidis | Enteritidis | 1425  | 31447 |
| SAL_BA8181AA | 13385      | SRR1969936 | 2014 | 5  | Europe        | United Kingdom | Enteritidis | Enteritidis | 1425  | 31444 |
| SAL_BA8183AA | 12188      | SRR1969935 | 2014 | 5  | Europe        | United Kingdom | Enteritidis | Enteritidis | 1425  | 31443 |
| SAL_BA8185AA | 24988      | SRR1969934 | 2014 | 7  | Europe        | United Kingdom | Enteritidis | Enteritidis | 1425  | 31442 |
| SAL_BA8187AA | 27062      | SRR1969933 | 2014 | 7  | Europe        | United Kingdom | Enteritidis | Enteritidis | 3888  | 31441 |
| SAL_BA8189AA | 23507      | SRR1969932 | 2014 | 6  | 19 Europe     | United Kingdom | Enteritidis | Enteritidis | 3888  | 31439 |
| SAL_BA8197AA | 41991      | SRR1969928 | 2014 | 8  | 19 Europe     | United Kingdom | Enteritidis | Enteritidis | 3888  | 31431 |
| SAL_BA8201AA | 52969      | SRR1969926 | 2014 | 10 | Europe        | United Kingdom | Enteritidis | Enteritidis | 1425  | 31427 |
| SAL_BA8203AA | 13359      | SRR1969925 | 2014 | 4  | Europe        | United Kingdom | Enteritidis | Enteritidis | 1425  | 31425 |
| SAL_BA8205AA | 34204      | SRR1969924 | 2014 | 7  | 28 Europe     | United Kingdom | Enteritidis | Enteritidis | 3888  | 31423 |
| SAL_BA8209AA | 31653      | SRR1969922 | 2014 | 7  | Europe        | United Kingdom | Enteritidis | Enteritidis | 1425  | 31419 |
| SAL_BA8230AA | 80604      | SRR1969912 | 2015 | 1  | Europe        | United Kingdom | Enteritidis | Enteritidis | 1425  | 31400 |
| SAL_BA8241AA | AZ_TG68160 | SRR953549  | 2009 |    | North America | United States  | Enteritidis | Enteritidis | 1425  | 31394 |
| SAL_BA8248AA | AZ_TG68132 | SRR953545  | 2009 |    | North America | United States  | Enteritidis | Enteritidis | 1425  | 31387 |
| SAL_BA8252AA | AZ_TG68072 | SRR953543  | 2008 |    | North America | United States  | Enteritidis | Enteritidis | 1425  | 31385 |
| SAL_BA8255AA | 14538      | SRR1969900 | 2014 | 5  | Europe        | United Kingdom | Enteritidis | Enteritidis | 1425  | 31382 |
| SAL_BA8261AA | 9417       | SRR1969897 | 2014 | 4  | Europe        | United Kingdom | Enteritidis | Enteritidis | 3888  | 31376 |
| SAL_BA8265AA | 25225      | SRR1969895 | 2014 | 7  | 28 Europe     | United Kingdom | Enteritidis | Enteritidis | 3888  | 31374 |
| SAL_BA8266AA | 46578      | SRR1969894 | 2014 | 7  | Europe        | United Kingdom | Enteritidis | Enteritidis | 1425  | 31373 |
| SAL_BA8273AA | 38430      | SRR1969891 | 2014 | 8  | 1 Europe      | Jersey         | Enteritidis | Enteritidis | 3888  | 31366 |
| SAL_BA8283AA | 9175       | SRR1969886 | 2014 | 5  | Europe        | United Kingdom | Enteritidis | Enteritidis | 1425  | 31358 |
| SAL_BA8293AA | 63933      | SRR1969881 | 2014 | 11 | Europe        | United Kingdom | Enteritidis | Enteritidis | 26544 | 31348 |
| SAL_BA8298AA | 46577      | SRR1969878 | 2014 | 7  | Europe        | United Kingdom | Enteritidis | Enteritidis | 1425  | 31344 |
| SAL_BA8308AA | 94097      | SRR1969873 | 2015 | 3  | Europe        | United Kingdom | Enteritidis | Enteritidis | 1425  | 31335 |
| SAL_BA8310AA | 94266      | SRR1969872 | 2015 | 3  | Europe        | United Kingdom | Enteritidis | Enteritidis | 1425  | 31334 |
| SAL_BA8312AA | 32394      | SRR1969871 | 2014 | 7  | Europe        | United Kingdom | Enteritidis | Enteritidis | 1425  | 31332 |
| SAL_BA8317AA | 52962      | SRR1969869 | 2014 | 10 | Europe        | United Kingdom | Enteritidis | Enteritidis | 1425  | 31327 |
| SAL_BA8321AA | 50859      | SRR1969867 | 2014 | 9  | Europe        | United Kingdom | Enteritidis | Enteritidis | 1425  | 31323 |
| SAL_BA8330AA | 3796       | SRR1969862 | 2014 | 4  | Europe        | United Kingdom | Enteritidis | Enteritidis | 3888  | 31315 |
| SAL_BA8350AA | 50848      | SRR1969852 | 2014 | 9  | Europe        | United Kingdom | Enteritidis | Enteritidis | 1425  | 31304 |
| SAL_BA8354AA | 80593      | SRR1969850 | 2015 | 1  | Europe        | United Kingdom | Enteritidis | Enteritidis | 1425  | 31301 |
| SAL_BA8357AA | A376       | ERR326643  |      |    |               |                | Typhi       | Enteritidis | 1425  | 31278 |
| SAL_BA8362AA | 63578      | SRR1969846 | 2014 | 10 | Europe        | United Kingdom | Enteritidis | Enteritidis | 1425  | 31299 |
| SAL_BA8364AA | 37007      | SRR1969845 | 2014 | 8  | 1 Europe      | United Kingdom | Enteritidis | Enteritidis | 3888  | 31298 |
| SAL_BA8366AA | 51287      | SRR1969844 | 2014 | 9  | Europe        | United Kingdom | Enteritidis | Enteritidis | 1425  | 24690 |
| SAL_BA8372AA | 53113      | SRR1969841 | 2014 | 9  | 29 Europe     | United Kingdom | Enteritidis | Enteritidis | 28689 | 31296 |
| SAL_BA8376AA | 36474      | SRR1969839 | 2014 | 7  | 21 Europe     | United Kingdom | Enteritidis | Enteritidis | 3888  | 2066  |
| SAL_BA8378AA | 37826      | SRR1969838 | 2014 | 7  | 28 Europe     | United Kingdom | Enteritidis | Enteritidis | 3888  | 2066  |
| SAL_BA8382AA | 40790      | SRR1969836 | 2014 | 8  | Europe        | United Kingdom | Enteritidis | Enteritidis | 1425  | 31292 |
| SAL_BA8387AA | 83724      | SRR1969834 | 2015 | 1  | Europe        | United Kingdom | Enteritidis | Enteritidis | 1425  | 29703 |
| SAL_BA8398AA | 89903      | SRR1969829 | 2015 | 2  | Europe        | United Kingdom | Enteritidis | Enteritidis | 1425  | 31279 |
| SAL_BA8399AA | A343       | ERR326621  |      |    |               |                | Typhi       | Enteritidis | 1425  | 31278 |
| SAL_BA8417AA | 13430      | SRR1969819 | 2014 | 5  | Europe        | United Kingdom | Enteritidis | Enteritidis | 1425  | 31265 |
| SAL_BA8424AA | 68685      | SRR1969815 | 2014 | 11 | Europe        | United Kingdom | Enteritidis | Enteritidis | 3888  | 25814 |
| SAL_BA8430AA | 27011      | SRR1969812 | 2014 | 7  | Europe        | United Kingdom | Enteritidis | Enteritidis | 1425  | 31258 |
| SAL_BA8440AA | 46592      | SRR1969807 | 2014 | 7  | Europe        | United Kingdom | Enteritidis | Enteritidis | 26142 | 31249 |
| SAL_BA8444AA | 37815      | SRR1969805 | 2014 | 7  | 30 Europe     | United Kingdom | Enteritidis | Enteritidis | 3888  | 28289 |
| SAL_BA8449AA | 37829      | SRR1969802 | 2014 | 7  | 28 Europe     | United Kingdom | Enteritidis | Enteritidis | 3888  | 28289 |
| SAL_BA8450AA | A138       | ERR326597  |      |    |               |                | Typhi       | Enteritidis | 7802  | 31241 |
| SAL_BA8462AA | 63753      | SRR1969795 | 2014 | 10 | Europe        | United Kingdom | Enteritidis | Enteritidis | 1425  | 25859 |
| SAL_BA8474AA | 65112      | SRR1969789 | 2014 | 11 | Europe        | United Kingdom | Enteritidis | Enteritidis | 1425  | 31225 |
| SAL_BA8476AA | 27977      | SRR1969788 | 2014 | 7  | Europe        | United Kingdom | Enteritidis | Enteritidis | 1425  | 31223 |
| SAL_BA8483AA | 31905      | SRR1969784 | 2014 | 7  | Europe        | United Kingdom | Enteritidis | Enteritidis | 1425  | 31216 |
| SAL_BA8493AA | 94103      | SRR1969779 | 2015 | 3  | 5 Europe      | United Kingdom | Enteritidis | Enteritidis | 1425  | 31207 |
| SAL_BA8507AA | 25271      | SRR1969772 | 2014 | 7  | Europe        | United Kingdom | Enteritidis | Enteritidis | 1425  | 31193 |
| SAL_BA8526AA | 36500      | SRR1969763 | 2014 | 7  | Europe        | United Kingdom | Enteritidis | Enteritidis | 3897  | 31178 |
| SAL_BA8530AA | 14131      | SRR1969761 | 2014 | 5  | Europe        | United Kingdom | Enteritidis | Enteritidis | 1425  | 31174 |
| SAL_BA8533AA | 36505      | SRR1969759 | 2014 | 7  | Europe        | United Kingdom | Enteritidis | Enteritidis | 3888  | 31171 |
| SAL_BA8536AA | 36516      | SRR1969758 | 2014 | 7  | 21 Europe     | United Kingdom | Enteritidis | Enteritidis | 3888  | 27476 |

|              |                  |            |      |    |               |                |                         |             |       |       |
|--------------|------------------|------------|------|----|---------------|----------------|-------------------------|-------------|-------|-------|
| SAL_BA8538AA | 68961            | SRR1969757 | 2014 | 11 | Europe        | United Kingdom | Enteritidis             | Enteritidis | 1425  | 31169 |
| SAL_BA8543AA | 26665            | SRR1969754 | 2014 | 7  | Europe        | United Kingdom | Enteritidis             | Enteritidis | 1425  | 31167 |
| SAL_BA8545AA | 31613            | SRR1969753 | 2014 | 7  | 14 Europe     | United Kingdom | Enteritidis             | Enteritidis | 3888  | 31165 |
| SAL_BA8552AA | 3739             | SRR1969750 | 2014 | 4  | Europe        | United Kingdom | Enteritidis             | Enteritidis | 1425  | 31160 |
| SAL_BA8565AA | 57160            | SRR1969744 | 2014 | 10 | Europe        | United Kingdom | Enteritidis             | Enteritidis | 1425  | 31151 |
| SAL_BA8571AA | 38360            | SRR1969741 | 2014 | 8  | Europe        | United Kingdom | Enteritidis             | Enteritidis | 1425  | 31146 |
| SAL_BA8573AA | 40365            | SRR1969740 | 2014 | 8  | Europe        | United Kingdom | Enteritidis             | Enteritidis | 1425  | 31144 |
| SAL_BA8576AA | 31612            | SRR1969738 | 2014 | 7  | 14 Europe     | United Kingdom | Enteritidis             | Enteritidis | 3888  | 31141 |
| SAL_BA8580AA | 85730            | SRR1969736 | 2015 | 2  | Europe        | United Kingdom | Enteritidis             | Enteritidis | 1425  | 27079 |
| SAL_BA8588AA | 37799            | SRR1969732 | 2014 | 8  | 1 Europe      | United Kingdom | Enteritidis             | Enteritidis | 3888  | 31130 |
| SAL_BA8596AA | CFSAN005656      | SRR950678  | 2006 | 11 | North America | United States  | Enteritidis (Predicted) | Enteritidis | 1425  | 31122 |
| SAL_BA8599AA | 39476            | SRR1969727 | 2014 | 8  | 15 Europe     | United Kingdom | Enteritidis             | Enteritidis | 1425  | 31119 |
| SAL_BA8611AA | 65329            | SRR1969721 | 2014 | 9  | Europe        | United Kingdom | Enteritidis             | Enteritidis | 1425  | 27094 |
| SAL_BA8613AA | 12151            | SRR1969720 | 2014 | 5  | Europe        | United Kingdom | Enteritidis             | Enteritidis | 1425  | 31108 |
| SAL_BA8623AA | 38327            | SRR1969715 | 2014 | 8  | Europe        | United Kingdom | Enteritidis             | Enteritidis | 3888  | 31099 |
| SAL_BA8625AA | 63759            | SRR1969714 | 2014 | 10 | Europe        | United Kingdom | Enteritidis             | Enteritidis | 1425  | 25087 |
| SAL_BA8627AA | 37035            | SRR1969713 | 2014 | 8  | Europe        | France         | Enteritidis             | Enteritidis | 3888  | 31096 |
| SAL_BA8631AA | 96955            | SRR1969711 | 2015 | 3  | Europe        | United Kingdom | Enteritidis             | Enteritidis | 1425  | 31093 |
| SAL_BA8636AA | 32475            | SRR1969708 | 2014 | 7  | 17 Europe     | United Kingdom | Enteritidis             | Enteritidis | 3888  | 31088 |
| SAL_BA8638AA | 91268            | SRR1969707 | 2015 | 2  | Europe        | United Kingdom | Enteritidis             | Enteritidis | 3888  | 31086 |
| SAL_BA8661AA | 45612            | SRR1969696 | 2014 | 9  | Europe        | United Kingdom | Enteritidis             | Enteritidis | 1425  | 31064 |
| SAL_BA8669AA | 36528            | SRR1969692 | 2014 | 7  | 28 Europe     | United Kingdom | Enteritidis             | Enteritidis | 3888  | 31057 |
| SAL_BA8674AA | 9465             | SRR1969689 | 2014 | 4  | Europe        | United Kingdom | Enteritidis             | Enteritidis | 1425  | 28464 |
| SAL_BA8677AA | NY_IDR1300013484 | SRR949508  | 2013 | 5  | North America | United States  | Enteritidis             | Enteritidis | 1425  | 31051 |
| SAL_BA8678AA | NY_IDR1300012602 | SRR949507  | 2013 | 4  | North America | United States  | Enteritidis             | Enteritidis | 1425  | 31050 |
| SAL_BA8679AA | 31940            | SRR1969687 | 2014 | 7  | Europe        | United Kingdom | Enteritidis             | Enteritidis | 1425  | 31049 |
| SAL_BA8680AA | NY_IDR1300011707 | SRR949506  | 2013 | 4  | North America | United States  | Enteritidis             | Enteritidis | 1425  | 31047 |
| SAL_BA8682AA | NY_IDR1300011220 | SRR949505  | 2013 | 4  | North America | United States  | Enteritidis             | Enteritidis | 1425  | 31047 |
| SAL_BA8684AA | NY_IDR1300011034 | SRR949504  | 2013 | 4  | North America | United States  | Enteritidis             | Enteritidis | 1425  | 31045 |
| SAL_BA8685AA | 45607            | SRR1969684 | 2014 | 9  | Europe        | United Kingdom | Enteritidis             | Enteritidis | 1425  | 31044 |
| SAL_BA8686AA | NY_IDR1300010759 | SRR949503  | 2013 | 4  | North America | United States  | Enteritidis             | Enteritidis | 1425  | 31043 |
| SAL_BA8688AA | NY_IDR1300009147 | SRR949502  | 2013 | 3  | North America | United States  | Enteritidis             | Enteritidis | 1425  | 31042 |
| SAL_BA8690AA | NY_IDR1300008695 | SRR949501  | 2013 | 3  | North America | United States  | Enteritidis             | Enteritidis | 1425  | 31040 |
| SAL_BA8691AA | 6462             | SRR1969681 | 2014 | 4  | Europe        | United Kingdom | Enteritidis             | Enteritidis | 1425  | 31039 |
| SAL_BA8693AA | NY_IDR1300008373 | SRR949500  | 2013 | 3  | North America | United States  | Enteritidis             | Enteritidis | 1425  | 31037 |
| SAL_BA8695AA | NY_IDR1300008146 | SRR949499  | 2013 | 3  | North America | United States  | Enteritidis             | Enteritidis | 1425  | 31035 |
| SAL_BA8698AA | 67564            | SRR1969677 | 2014 | 11 | Europe        | United Kingdom | Enteritidis             | Enteritidis | 3888  | 25602 |
| SAL_BA8706AA | 96958            | SRR1969673 | 2015 | 3  | Europe        | United Kingdom | Enteritidis             | Enteritidis | 1425  | 31027 |
| SAL_BA8710AA | 31666            | SRR1969671 | 2014 | 7  | Europe        | United Kingdom | Enteritidis             | Enteritidis | 3888  | 31024 |
| SAL_BA8718AA | 68960            | SRR1969667 | 2014 | 11 | Europe        | United Kingdom | Enteritidis             | Enteritidis | 1425  | 413   |
| SAL_BA8730AA | 36388            | SRR1969660 | 2014 | 8  | Europe        | United Kingdom | Enteritidis             | Enteritidis | 1425  | 31006 |
| SAL_BA8735AA | 53129            | SRR1969657 | 2014 | 9  | 29 Europe     | United Kingdom | Enteritidis             | Enteritidis | 1425  | 31001 |
| SAL_BA8737AA | 9325             | SRR1969656 | 2014 | 4  | Europe        | United Kingdom | Enteritidis             | Enteritidis | 1425  | 30999 |
| SAL_BA8742AA | 85729            | SRR1969653 | 2015 | 2  | Europe        | United Kingdom | Enteritidis             | Enteritidis | 1425  | 30995 |
| SAL_BA8745AA | 24057            | SRR1969651 | 2014 | 6  | Europe        | United Kingdom | Enteritidis             | Enteritidis | 26434 | 30993 |
| SAL_BA8786AA | NY_BAC0700002773 | SRR949426  | 2007 | 3  | North America | United States  | Enteritidis             | Enteritidis | 1425  | 30959 |
| SAL_BA8794AA | 80558            | SRR1969627 | 2015 | 1  | Europe        | United Kingdom | Enteritidis             | Enteritidis | 1425  | 30951 |
| SAL_BA8802AA | 53133            | SRR1969623 | 2014 | 9  | Europe        | United Kingdom | Enteritidis             | Enteritidis | 1425  | 30944 |
| SAL_BA8804AA | 22254            | SRR1969622 | 2014 | 6  | Europe        | United Kingdom | Enteritidis             | Enteritidis | 1425  | 30943 |
| SAL_BA8808AA | 50363            | SRR1969620 | 2014 | 9  | Europe        | United Kingdom | Enteritidis             | Enteritidis | 1425  | 30940 |
| SAL_BA8810AA | 27064            | SRR1969619 | 2014 | 7  | Europe        | United Kingdom | Enteritidis             | Enteritidis | 1425  | 30938 |
| SAL_BA8811AA | NY_BAC0600005606 | SRR949414  | 2006 | 7  | North America | United States  | Enteritidis             | Enteritidis | 1425  | 11422 |
| SAL_BA8813AA | 9285             | SRR1969617 | 2014 | 5  | Europe        | United Kingdom | Enteritidis             | Enteritidis | 1425  | 30937 |
| SAL_BA8822AA | 96228            | SRR1969613 | 2015 | 3  | Europe        | United Kingdom | Enteritidis             | Enteritidis | 3888  | 30930 |
| SAL_BA8823AA | 99784            | SRR1969612 | 2015 | 3  | Europe        | United Kingdom | Enteritidis             | Enteritidis | 1425  | 2299  |
| SAL_BA8826AA | 27965            | SRR1969611 | 2014 | 7  | Europe        | United Kingdom | Enteritidis             | Enteritidis | 3888  | 30927 |
| SAL_BA8836AA | 50359            | SRR1969605 | 2014 | 9  | Europe        | United Kingdom | Enteritidis             | Enteritidis | 1425  | 30919 |
| SAL_BA8844AA | 31652            | SRR1969601 | 2014 | 7  | 9 Europe      | United Kingdom | Enteritidis             | Enteritidis | 3888  | 30913 |
| SAL_BA8852AA | 32460            | SRR1969597 | 2014 | 7  | 16 Europe     | United Kingdom | Enteritidis             | Enteritidis | 3888  | 30907 |

|              |                                     |            |      |    |               |                |             |             |       |       |
|--------------|-------------------------------------|------------|------|----|---------------|----------------|-------------|-------------|-------|-------|
| SAL_BA8859AA | 83322                               | SRR1969593 | 2015 | 1  | Europe        | United Kingdom | Enteritidis | Enteritidis | 1425  | 30901 |
| SAL_BA8861AA | 6446                                | SRR1969592 | 2014 | 4  | 17 Europe     | United Kingdom | Enteritidis | Enteritidis | 1425  | 30900 |
| SAL_BA8867AA | 85758                               | SRR1969589 | 2015 | 2  | 9 Europe      | United Kingdom | Enteritidis | Enteritidis | 1425  | 27533 |
| SAL_BA8878AA | 63585                               | SRR1969583 | 2014 | 10 | Europe        | United Kingdom | Enteritidis | Enteritidis | 7811  | 24739 |
| SAL_BA8887AA | 38428                               | SRR1969578 | 2014 | 7  | 29 Europe     | United Kingdom | Enteritidis | Enteritidis | 3888  | 30879 |
| SAL_BA8889AA | 31655                               | SRR1969577 | 2014 | 7  | Europe        | United Kingdom | Enteritidis | Enteritidis | 26142 | 30877 |
| SAL_BA8899AA | 9292                                | SRR1969572 | 2014 | 5  | Europe        | United Kingdom | Enteritidis | Enteritidis | 1425  | 30870 |
| SAL_BA8911AA | 25215                               | SRR1969566 | 2014 | 7  | Europe        | United Kingdom | Enteritidis | Enteritidis | 3888  | 30861 |
| SAL_BA8947AA | 41992                               | SRR1969548 | 2014 | 8  | Europe        | United Kingdom | Enteritidis | Enteritidis | 1425  | 30827 |
| SAL_BA8949AA | 36466                               | SRR1969547 | 2014 | 7  | Europe        | United Kingdom | Enteritidis | Enteritidis | 1425  | 30825 |
| SAL_BA8951AA | 36530                               | SRR1969546 | 2014 | 7  | 28 Europe     | United Kingdom | Enteritidis | Enteritidis | 3888  | 2066  |
| SAL_BA8953AA | 65431                               | SRR1969545 | 2014 | 10 | Europe        | United Kingdom | Enteritidis | Enteritidis | 1425  | 30822 |
| SAL_BA8968AA | 5359                                | SRR1969538 | 2014 | 4  | Europe        | United Kingdom | Enteritidis | Enteritidis | 1425  | 30810 |
| SAL_BA8975AA | 5356                                | SRR1969534 | 2014 | 4  | Europe        | United Kingdom | Enteritidis | Enteritidis | 3888  | 30806 |
| SAL_BA8977AA | 56109                               | SRR1969533 | 2014 | 9  | Europe        | United Kingdom | Enteritidis | Enteritidis | 1425  | 7550  |
| SAL_BA9065AA | 108_2012K_179-sc-2013-02-ERR317078  |            |      |    |               |                | Enteritidis | Enteritidis | 1425  | 30754 |
| SAL_BA9067AA | 106_2011K_1681-sc-2013-0-ERR317076  |            |      |    |               |                | Enteritidis | Enteritidis | 1425  | 30753 |
| SAL_BA9068AA | 105_2011K_1654-sc-2013-0-ERR317075  |            |      |    |               |                | Enteritidis | Enteritidis | 7801  | 30752 |
| SAL_BA9069AA | 104_AM25928_B-sc-2013-0-ERR317074   |            |      |    |               |                | Enteritidis | Enteritidis | 1425  | 30751 |
| SAL_BA9070AA | 103_08_639-sc-2013-02-27T1ERR317073 |            |      |    |               |                | Enteritidis | Enteritidis | 1425  | 30750 |
| SAL_BA9072AA | 101_AM27283_B-sc-2013-0-ERR317071   |            |      |    |               |                | Enteritidis | Enteritidis | 1425  | 30748 |
| SAL_BA9073AA | 100_8_403-sc-2013-02-27T1ERR317070  |            |      |    |               |                | Enteritidis | Enteritidis | 1425  | 30747 |
| SAL_BA9074AA | 99_CDC_H9556-sc-2013-02-ERR317069   |            |      |    |               |                | Enteritidis | Enteritidis | 27569 | 16463 |
| SAL_BA9076AA | S6669_03N-sc-2013-02-27T1ERR317067  |            |      |    |               |                | Enteritidis | Enteritidis | 1425  | 30746 |
| SAL_BA9077AA | S6669_03L-sc-2013-02-27T1ERR317066  |            |      |    |               |                | Enteritidis | Enteritidis | 1425  | 30745 |
| SAL_BA9078AA | S1750_06                            | ERR317065  | 2006 |    |               |                | Enteritidis | Enteritidis | 1425  | 30744 |
| SAL_BA9079AA | S4726_04                            | ERR317064  | 2006 |    | Europe        | United Kingdom | Enteritidis | Enteritidis | 1425  | 30743 |
| SAL_BA9080AA | 9508_211-sc-2013-02-27T10ERR317063  |            |      |    |               |                | Enteritidis | Enteritidis | 1425  | 30742 |
| SAL_BA9081AA | 9508_195                            | ERR317062  | 1994 |    | North America | United States  | Enteritidis | Enteritidis | 1425  | 30741 |
| SAL_BA9082AA | EX4_PT21b                           | ERR317061  | 1996 |    |               |                | Enteritidis | Enteritidis | 1425  | 41044 |
| SAL_BA9083AA | SED-sc-2013-02-27T10:26:54ERR317060 |            |      |    |               |                | Enteritidis | Enteritidis | 1425  | 30739 |
| SAL_BA9084AA | SEC-sc-2013-02-27T10:26:53ERR317059 |            |      |    |               |                | Enteritidis | Enteritidis | 1425  | 30738 |
| SAL_BA9085AA | SE A                                | ERR317058  | 1994 |    | North America | United States  | Enteritidis | Enteritidis | 1425  | 30737 |
| SAL_BA9087AA | RD84                                | ERR317056  | 2005 |    | Europe        | United Kingdom | Enteritidis | Enteritidis | 1425  | 30736 |
| SAL_BA9088AA | RD79-sc-2013-02-27T10:26:ERR317055  |            |      |    |               |                | Enteritidis | Enteritidis | 1425  | 30735 |
| SAL_BA9089AA | RD76-sc-2013-02-27T10:26:ERR317054  |            |      |    |               |                | Enteritidis | Enteritidis | 1425  | 30734 |
| SAL_BA9090AA | RD72-sc-2013-02-27T10:26:ERR317053  |            |      |    |               |                | Enteritidis | Enteritidis | 1425  | 30733 |
| SAL_BA9091AA | RD57-sc-2013-02-27T10:26:ERR317052  |            |      |    |               |                | Enteritidis | Enteritidis | 7799  | 30732 |
| SAL_BA9092AA | RD55-sc-2013-02-27T10:26:ERR317051  |            |      |    |               |                | Enteritidis | Enteritidis | 1425  | 30731 |
| SAL_BA9093AA | RD54-sc-2013-02-27T10:26:ERR317050  |            |      |    |               |                | Enteritidis | Enteritidis | 7799  | 30730 |
| SAL_BA9094AA | RD51-sc-2013-02-27T10:26:ERR317049  |            |      |    |               |                | Enteritidis | Enteritidis | 1425  | 30729 |
| SAL_BA9095AA | RD50                                | ERR317048  | 2005 |    | Europe        | United Kingdom | Enteritidis | Enteritidis | 1425  | 30728 |
| SAL_BA9097AA | RD45-sc-2013-02-27T10:26:ERR317046  |            |      |    |               |                | Enteritidis | Enteritidis | 1425  | 30726 |
| SAL_BA9098AA | RD46                                | ERR317045  | 2005 |    | Europe        | United Kingdom | Enteritidis | Enteritidis | 1425  | 41043 |
| SAL_BA9099AA | RD44-sc-2013-02-27T10:26:ERR317044  |            |      |    |               |                | Enteritidis | Enteritidis | 1425  | 30724 |
| SAL_BA9100AA | RD42-sc-2013-02-27T10:26:ERR317043  |            |      |    |               |                | Enteritidis | Enteritidis | 1425  | 30724 |
| SAL_BA9101AA | RD40-sc-2013-02-27T10:26:ERR317042  |            |      |    |               |                | Enteritidis | Enteritidis | 1425  | 30723 |
| SAL_BA9102AA | RD36                                | ERR317041  | 2005 |    | Europe        | United Kingdom | Enteritidis | Enteritidis | 1425  | 30722 |
| SAL_BA9103AA | RD30-sc-2013-02-27T10:26:ERR317040  |            |      |    |               |                | Enteritidis | Enteritidis | 1425  | 30721 |
| SAL_BA9104AA | RD26                                | ERR317039  | 2005 |    | Europe        | United Kingdom | Enteritidis | Enteritidis | 1425  | 30720 |
| SAL_BA9105AA | RD6-sc-2013-02-27T10:26:2ERR317038  |            |      |    |               |                | Enteritidis | Enteritidis | 1425  | 30719 |
| SAL_BA9106AA | RD3                                 | ERR317037  | 2005 |    | Europe        | United Kingdom | Enteritidis | Enteritidis | 1425  | 41042 |
| SAL_BA9107AA | RD2-sc-2013-02-27T10:26:2ERR317036  |            |      |    |               |                | Enteritidis | Enteritidis | 1425  | 30717 |
| SAL_BA9109AA | P19-sc-2013-02-27T10:26:2ERR317035  |            |      |    |               |                | Enteritidis | Enteritidis | 1425  | 30715 |
| SAL_BA9111AA | P17                                 | ERR317034  | 2007 |    |               |                | Enteritidis | Enteritidis | 1425  | 41041 |
| SAL_BA9112AA | 45610                               | SRR1969527 | 2014 | 9  | 9 Europe      | United Kingdom | Enteritidis | Enteritidis | 1425  | 30712 |
| SAL_BA9113AA | P16-sc-2013-02-27T10:26:24ERR317033 |            |      |    |               |                | Enteritidis | Enteritidis | 28706 | 30711 |
| SAL_BA9114AA | 21779                               | SRR1969526 | 2014 | 6  | 12 Europe     | United Kingdom | Enteritidis | Enteritidis | 3888  | 674   |
| SAL_BA9115AA | P15-sc-2013-02-27T10:26:23ERR317032 |            |      |    |               |                | Enteritidis | Enteritidis | 28706 | 41040 |

|              |                                     |            |      |    |    |        |                |  |                         |             |       |       |
|--------------|-------------------------------------|------------|------|----|----|--------|----------------|--|-------------------------|-------------|-------|-------|
| SAL_BA9117AA | P14-sc-2013-02-27T10:26:22ERR317031 |            |      |    |    |        |                |  | Enteritidis             | Enteritidis | 1425  | 41092 |
| SAL_BA9118AA | P13-sc-2013-02-27T10:26:21ERR317030 |            |      |    |    |        |                |  | Enteritidis             | Enteritidis | 1425  | 30707 |
| SAL_BA9120AA | P12-sc-2013-02-27T10:26:19ERR317029 |            |      |    |    |        |                |  | Enteritidis             | Enteritidis | 1425  | 30705 |
| SAL_BA9122AA | P11-sc-2013-02-27T10:26:18ERR317028 |            |      |    |    |        |                |  | Enteritidis             | Enteritidis | 1425  | 30701 |
| SAL_BA9124AA | P10-sc-2013-02-27T10:26:17ERR317027 |            |      |    |    |        |                |  | Enteritidis             | Enteritidis | 1425  | 30701 |
| SAL_BA9126AA | P9-sc-2013-02-27T10:26:15ZERR317026 |            |      |    |    |        |                |  | Enteritidis             | Enteritidis | 1425  | 30701 |
| SAL_BA9128AA | P8-sc-2013-02-27T10:26:14ZERR317025 |            |      |    |    |        |                |  | Enteritidis             | Enteritidis | 1425  | 41091 |
| SAL_BA9130AA | P7-sc-2013-02-27T10:26:13ZERR317024 |            |      |    |    |        |                |  | Enteritidis             | Enteritidis | 1425  | 41090 |
| SAL_BA9132AA | P6-sc-2013-02-27T10:26:12ZERR317023 |            |      |    |    |        |                |  | Enteritidis             | Enteritidis | 1425  | 41089 |
| SAL_BA9133AA | 23082                               | SRR1969517 | 2014 | 6  | 8  | Europe | United Kingdom |  | Enteritidis             | Enteritidis | 3888  | 30694 |
| SAL_BA9134AA | P5                                  | ERR317022  | 2007 |    |    |        |                |  | Enteritidis             | Enteritidis | 1425  | 41088 |
| SAL_BA9135AA | P4-sc-2013-02-27T10:26:09ZERR317021 |            |      |    |    |        |                |  | Enteritidis             | Enteritidis | 1425  | 30692 |
| SAL_BA9136AA | 65375                               | SRR1969516 | 2014 | 10 |    | Europe | United Kingdom |  | Enteritidis             | Enteritidis | 1425  | 30691 |
| SAL_BA9137AA | P2                                  | ERR317020  | 2007 |    |    |        |                |  | Enteritidis             | Enteritidis | 1425  | 30690 |
| SAL_BA9138AA | 39506                               | SRR1969515 | 2014 | 8  | 8  | Europe | United Kingdom |  | Enteritidis             | Enteritidis | 3888  | 30689 |
| SAL_BA9151AA | M204 / NCTC20341                    | ERR316979  | 1938 |    | 7  |        |                |  | Enteritidis (Predicted) | Enteritidis | 28710 | 30676 |
| SAL_BA9162AA | M1 / NCTC20000                      | ERR316936  | 1925 | 8  | 4  |        |                |  | Enteritidis (Predicted) | Enteritidis | 1425  | 30665 |
| SAL_BA9163AA | 38777                               | SRR1969503 | 2014 | 8  |    | Europe | United Kingdom |  | Enteritidis             | Enteritidis | 3888  | 30664 |
| SAL_BA9169AA | 75955                               | SRR1969500 | 2014 | 12 |    | Europe | United Kingdom |  | Enteritidis             | Enteritidis | 1425  | 30660 |
| SAL_BA9171AA | 94095                               | SRR1969499 | 2015 | 3  |    | Europe | United Kingdom |  | Enteritidis             | Enteritidis | 1425  | 30658 |
| SAL_BA9181AA | 68687                               | SRR1969494 | 2014 | 11 |    | Europe | United Kingdom |  | Enteritidis             | Enteritidis | 1425  | 25685 |
| SAL_BA9183AA | 65440                               | SRR1969493 | 2014 | 10 |    | Europe | United Kingdom |  | Enteritidis (Predicted) | Enteritidis | 1425  | 25004 |
| SAL_BA9189AA | 72318                               | SRR1969490 | 2014 | 11 |    | Europe | United Kingdom |  | Enteritidis             | Enteritidis | 1425  | 29320 |
| SAL_BA9191AA | 91277                               | SRR1969489 | 2015 | 2  |    | Europe | United Kingdom |  | Enteritidis             | Enteritidis | 1425  | 30641 |
| SAL_BA9200AA | 84450                               | SRR1969484 | 2015 | 2  |    | Europe | United Kingdom |  | Enteritidis             | Enteritidis | 1425  | 25914 |
| SAL_BA9204AA | 63916                               | SRR1969482 | 2014 | 11 |    | Europe | United Kingdom |  | Enteritidis             | Enteritidis | 1425  | 30631 |
| SAL_BA9226AA | 25184                               | SRR1969471 | 2014 | 7  |    | Europe | United Kingdom |  | Enteritidis             | Enteritidis | 1425  | 30610 |
| SAL_BA9229AA | 95045                               | SRR1969469 | 2015 | 3  |    | Europe | United Kingdom |  | Enteritidis             | Enteritidis | 1425  | 30607 |
| SAL_BA9246AA | 9278                                | SRR1969460 | 2014 | 5  |    | Europe | United Kingdom |  | Enteritidis             | Enteritidis | 1425  | 30595 |
| SAL_BA9262AA | 68698                               | SRR1969451 | 2014 | 11 |    | Europe | United Kingdom |  | Enteritidis             | Enteritidis | 1425  | 25546 |
| SAL_BA9266AA | 75937                               | SRR1969449 | 2014 | 12 |    | Europe | United Kingdom |  | Enteritidis             | Enteritidis | 1425  | 30580 |
| SAL_BA9270AA | 32396                               | SRR1969447 | 2014 | 7  |    | Europe | United Kingdom |  | Enteritidis             | Enteritidis | 1425  | 30576 |
| SAL_BA9273AA | 84429                               | SRR1969445 | 2015 | 1  |    | Europe | United Kingdom |  | Enteritidis             | Enteritidis | 1425  | 30573 |
| SAL_BA9275AA | 73126                               | SRR1969444 | 2014 | 12 |    | Europe | United Kingdom |  | Enteritidis             | Enteritidis | 1425  | 30571 |
| SAL_BA9277AA | 50844                               | SRR1969443 | 2014 | 9  |    | Europe | United Kingdom |  | Enteritidis             | Enteritidis | 1425  | 30569 |
| SAL_BA9293AA | 21783                               | SRR1969436 | 2014 | 6  | 5  | Europe | United Kingdom |  | Enteritidis             | Enteritidis | 3888  | 30553 |
| SAL_BA9303AA | 53111                               | SRR1969431 | 2014 | 9  |    | Europe | United Kingdom |  | Enteritidis             | Enteritidis | 1425  | 30545 |
| SAL_BA9309AA | 98251                               | SRR1969428 | 2015 | 3  |    | Europe | United Kingdom |  | Enteritidis             | Enteritidis | 1425  | 30542 |
| SAL_BA9310AA | 38776                               | SRR1969427 | 2014 | 8  |    | Europe | United Kingdom |  | Enteritidis             | Enteritidis | 26142 | 30541 |
| SAL_BA9311AA | 45620                               | SRR1969426 | 2014 | 9  |    | Europe | United Kingdom |  | Enteritidis             | Enteritidis | 1425  | 30540 |
| SAL_BA9313AA | 86885                               | SRR1969424 | 2015 | 2  |    | Europe | United Kingdom |  | Enteritidis             | Enteritidis | 1425  | 1434  |
| SAL_BA9318AA | 12171                               | SRR1969419 | 2014 | 5  |    | Europe | United Kingdom |  | Enteritidis             | Enteritidis | 1425  | 30536 |
| SAL_BA9321AA | 38779                               | SRR1969416 | 2014 | 8  | 7  | Europe | United Kingdom |  | Enteritidis             | Enteritidis | 3888  | 2066  |
| SAL_BA9324AA | 9308                                | SRR1969413 | 2014 | 5  |    | Europe | United Kingdom |  | Enteritidis             | Enteritidis | 1425  | 30532 |
| SAL_BA9326AA | 69925                               | SRR1969411 | 2014 | 11 |    | Europe | United Kingdom |  | Enteritidis             | Enteritidis | 1425  | 30530 |
| SAL_BA9327AA | 37033                               | SRR1969410 | 2014 | 8  |    | Europe | United Kingdom |  | Enteritidis             | Enteritidis | 1425  | 30529 |
| SAL_BA9334AA | 27032                               | SRR1969403 | 2014 | 7  |    | Europe | United Kingdom |  | Enteritidis             | Enteritidis | 1425  | 30522 |
| SAL_BA9337AA | 37834                               | SRR1969400 | 2014 | 7  | 31 | Europe | United Kingdom |  | Enteritidis             | Enteritidis | 3888  | 30520 |
| SAL_BA9338AA | 38721                               | SRR1969399 | 2014 | 8  |    | Europe | United Kingdom |  | Enteritidis             | Enteritidis | 1425  | 30519 |
| SAL_BA9347AA | 13413                               | SRR1969390 | 2014 | 5  | 16 | Europe | United Kingdom |  | Enteritidis             | Enteritidis | 1425  | 30510 |
| SAL_BA9349AA | 39445                               | SRR1969388 | 2014 | 7  |    | Europe | United Kingdom |  | Enteritidis             | Enteritidis | 1425  | 30508 |
| SAL_BA9351AA | 37038                               | SRR1969386 | 2014 | 8  |    | Europe | France         |  | Enteritidis             | Enteritidis | 3888  | 30506 |
| SAL_BA9353AA | 51258                               | SRR1969384 | 2014 | 9  |    | Europe | United Kingdom |  | Enteritidis             | Enteritidis | 3888  | 30504 |
| SAL_BA9365AA | 46583                               | SRR1969372 | 2014 | 7  | 14 | Europe | United Kingdom |  | Enteritidis             | Enteritidis | 3888  | 30496 |
| SAL_BA9371AA | 32517                               | SRR1969366 | 2014 | 7  |    | Europe | United Kingdom |  | Enteritidis             | Enteritidis | 1425  | 30490 |
| SAL_BA9372AA | 46593                               | SRR1969365 | 2014 | 7  | 15 | Europe | United Kingdom |  | Enteritidis             | Enteritidis | 3888  | 30489 |
| SAL_BA9376AA | 69903                               | SRR1969361 | 2014 | 11 |    | Europe | United Kingdom |  | Enteritidis (Predicted) | Enteritidis | 1425  | 30485 |
| SAL_BA9378AA | 25216                               | SRR1969359 | 2014 | 7  |    | Europe | United Kingdom |  | Enteritidis             | Enteritidis | 1425  | 30483 |
| SAL_BA9381AA | 27966                               | SRR1969356 | 2014 | 7  |    | Europe | United Kingdom |  | Enteritidis             | Enteritidis | 1425  | 30480 |

|              |                                       |            |      |    |               |                |                         |             |       |       |
|--------------|---------------------------------------|------------|------|----|---------------|----------------|-------------------------|-------------|-------|-------|
| SAL_BA9384AA | 25006                                 | SRR1969353 | 2014 | 7  | Europe        | United Kingdom | Enteritidis             | Enteritidis | 3888  | 30477 |
| SAL_BA9388AA | 27771                                 | SRR1969349 | 2014 | 6  | 26 Europe     | United Kingdom | Enteritidis             | Enteritidis | 3888  | 30473 |
| SAL_BA9389AA | 94076                                 | SRR1969348 | 2015 | 3  | Europe        | United Kingdom | Enteritidis             | Enteritidis | 1425  | 30472 |
| SAL_BA9396AA | 63882                                 | SRR1969341 | 2014 | 11 | Europe        | United Kingdom | Enteritidis             | Enteritidis | 1425  | 30466 |
| SAL_BA9397AA | 26641                                 | SRR1969340 | 2014 | 6  | 26 Europe     | United Kingdom | Enteritidis             | Enteritidis | 3888  | 26971 |
| SAL_BA9399AA | 9185                                  | SRR1969338 | 2014 | 5  | Europe        | United Kingdom | Enteritidis             | Enteritidis | 28716 | 30464 |
| SAL_BA9400AA | 51256                                 | SRR1969337 | 2014 | 9  | Europe        | United Kingdom | Enteritidis             | Enteritidis | 3888  | 30463 |
| SAL_BA9403AA | 39454                                 | SRR1969334 | 2014 | 7  | 28 Europe     | United Kingdom | Enteritidis             | Enteritidis | 3888  | 2066  |
| SAL_BA9405AA | 39480                                 | SRR1969332 | 2014 | 8  | Europe        | United Kingdom | Enteritidis             | Enteritidis | 1425  | 6917  |
| SAL_BA9406AA | 65053                                 | SRR1969331 | 2014 | 11 | Europe        | United Kingdom | Enteritidis             | Enteritidis | 1425  | 24879 |
| SAL_BA9409AA | 50856                                 | SRR1969328 | 2014 | 9  | Europe        | United Kingdom | Enteritidis             | Enteritidis | 1425  | 27930 |
| SAL_BA9411AA | 93568                                 | SRR1969326 | 2015 | 3  | Europe        | United Kingdom | Enteritidis             | Enteritidis | 1425  | 30458 |
| SAL_BA9422AA | 25265                                 | SRR1969315 | 2014 | 7  | Europe        | United Kingdom | Enteritidis             | Enteritidis | 3888  | 30449 |
| SAL_BA9423AA | 5879                                  | SRR1969314 | 2014 | 4  | Europe        | United Kingdom | Enteritidis             | Enteritidis | 1425  | 30448 |
| SAL_BA9426AA | 27051                                 | SRR1969311 | 2014 | 7  | Europe        | United Kingdom | Enteritidis             | Enteritidis | 3888  | 30446 |
| SAL_BA9427AA | 60166                                 | SRR1969310 | 2014 | 10 | Europe        | United Kingdom | Enteritidis             | Enteritidis | 1425  | 30444 |
| SAL_BA9428AA | 5964                                  | SRR1969309 | 2014 | 4  | Europe        | United Kingdom | Enteritidis             | Enteritidis | 1425  | 30443 |
| SAL_BA9434AA | 27976                                 | SRR1969303 | 2014 | 7  | Europe        | United Kingdom | Enteritidis             | Enteritidis | 1425  | 30438 |
| SAL_BA9435AA | 9180                                  | SRR1969302 | 2014 | 5  | Europe        | United Kingdom | Enteritidis             | Enteritidis | 1425  | 30437 |
| SAL_BA9436AA | 37798                                 | SRR1969301 | 2014 | 7  | 28 Europe     | United Kingdom | Enteritidis             | Enteritidis | 3888  | 30436 |
| SAL_BA9440AA | 38315                                 | SRR1969298 | 2014 | 7  | 28 Europe     | United Kingdom | Enteritidis             | Enteritidis | 3888  | 29305 |
| SAL_BA9448AA | 12110                                 | SRR1969291 | 2014 | 5  | 8 Europe      | United Kingdom | Enteritidis             | Enteritidis | 1425  | 30426 |
| SAL_BA9456AA | 63932                                 | SRR1969284 | 2014 | 11 | 6 Europe      | United Kingdom | Enteritidis             | Enteritidis | 1425  | 30418 |
| SAL_BA9457AA | 41995                                 | SRR1969283 | 2014 | 8  | 20 Europe     | United Kingdom | Enteritidis             | Enteritidis | 3888  | 30417 |
| SAL_BA9458AA | 13807                                 | SRR1969282 | 2014 | 5  | Europe        | United Kingdom | Enteritidis             | Enteritidis | 1425  | 30416 |
| SAL_BA9462AA | 55540                                 | SRR1969279 | 2014 | 9  | Europe        | United Kingdom | Enteritidis             | Enteritidis | 3888  | 3640  |
| SAL_BA9466AA | 39452                                 | SRR1969276 | 2014 | 7  | 28 Europe     | United Kingdom | Enteritidis             | Enteritidis | 3888  | 30409 |
| SAL_BA9467AA | 89999                                 | SRR1969275 | 2015 | 2  | Europe        | United Kingdom | Enteritidis             | Enteritidis | 1425  | 30408 |
| SAL_BA9468AA | 63047                                 | SRR1969274 | 2014 | 10 | Europe        | United Kingdom | Enteritidis             | Enteritidis | 1425  | 27396 |
| SAL_BA9472AA | CFSAN002042                           | SRR900926  |      |    |               |                | Enteritidis             | Enteritidis | 1425  | 30404 |
| SAL_BA9473AA | 42168                                 | SRR1969271 | 2014 | 9  | Europe        | United Kingdom | Enteritidis             | Enteritidis | 1425  | 30403 |
| SAL_BA9474AA | CFSAN002041                           | SRR900925  |      |    | North America | United States  | Enteritidis             | Enteritidis | 1425  | 30402 |
| SAL_BA9482AA | 41988                                 | SRR1969266 | 2014 | 8  | Europe        | United Kingdom | Enteritidis             | Enteritidis | 3888  | 30397 |
| SAL_BA9487AA | 93531                                 | SRR1969261 | 2015 | 3  | Europe        | United Kingdom | Enteritidis             | Enteritidis | 1425  | 30393 |
| SAL_BA9489AA | 9140                                  | SRR1969259 | 2014 | 5  | Europe        | United Kingdom | Enteritidis             | Enteritidis | 1425  | 25142 |
| SAL_BA9491AA | 68696                                 | SRR1969258 | 2014 | 11 | 13 Europe     | United Kingdom | Enteritidis             | Enteritidis | 1425  | 25666 |
| SAL_BA9505AA | Salmonella_ser__Enteritidis_ERR226477 |            |      |    |               |                | Enteritidis (Predicted) | Enteritidis | 1425  | 30379 |
| SAL_BA9517AA | Ke233-sc-2012-07-27T11:52:ERR217471   |            |      |    |               |                | Typhimurium             | Enteritidis | 1424  | 41359 |
| SAL_BA9519AA | Ke232-sc-2012-07-27T11:52:ERR217470   |            |      |    |               |                | Enteritidis             | Enteritidis | 1424  | 30369 |
| SAL_BA9524AA | 23078                                 | SRR1969242 | 2014 | 6  | Europe        | United Kingdom | Enteritidis             | Enteritidis | 1425  | 30364 |
| SAL_BA9525AA | Ke219-sc-2012-07-27T11:51:ERR217467   |            |      |    |               |                | Enteritidis             | Enteritidis | 1425  | 30363 |
| SAL_BA9532AA | 96976                                 | SRR1969238 | 2015 | 3  | Europe        | United Kingdom | Enteritidis             | Enteritidis | 1425  | 30358 |
| SAL_BA9536AA | Ke205-sc-2012-07-27T11:51:ERR217462   |            |      |    |               |                | Enteritidis             | Enteritidis | 1424  | 30354 |
| SAL_BA9538AA | Ke204-sc-2012-07-27T11:51:ERR217461   |            |      |    |               |                | Enteritidis             | Enteritidis | 1425  | 30318 |
| SAL_BA9540AA | Ke199-sc-2012-07-27T11:51:ERR217460   |            |      |    |               |                | Enteritidis             | Enteritidis | 1424  | 30256 |
| SAL_BA9545AA | 63588                                 | SRR1969231 | 2014 | 10 | Europe        | United Kingdom | Enteritidis             | Enteritidis | 1425  | 30348 |
| SAL_BA9546AA | Ke196-sc-2012-07-27T11:51:ERR217457   |            |      |    |               |                | Enteritidis             | Enteritidis | 1424  | 30347 |
| SAL_BA9550AA | 32550                                 | SRR1969229 | 2014 | 7  | 18 Europe     | United Kingdom | Enteritidis             | Enteritidis | 3888  | 30344 |
| SAL_BA9553AA | Ke189-sc-2012-07-27T11:51:ERR217453   |            |      |    |               |                | Enteritidis             | Enteritidis | 1425  | 30338 |
| SAL_BA9556AA | 76001                                 | SRR1969226 | 2014 | 12 | Europe        | United Kingdom | Enteritidis             | Enteritidis | 1425  | 30339 |
| SAL_BA9557AA | Ke187-sc-2012-07-27T11:51:ERR217451   |            |      |    |               |                | Enteritidis             | Enteritidis | 1425  | 30338 |
| SAL_BA9560AA | 38775                                 | SRR1969224 | 2014 | 8  | Europe        | United Kingdom | Enteritidis             | Enteritidis | 1425  | 30335 |
| SAL_BA9563AA | Ke181-sc-2012-07-27T11:51:ERR217448   |            |      |    |               |                | Enteritidis             | Enteritidis | 1424  | 30333 |
| SAL_BA9565AA | Ke180-sc-2012-07-27T11:51:ERR217447   |            |      |    |               |                | Enteritidis             | Enteritidis | 1424  | 41357 |
| SAL_BA9566AA | 50833                                 | SRR1969221 | 2014 | 9  | Europe        | United Kingdom | Enteritidis             | Enteritidis | 1425  | 30331 |
| SAL_BA9570AA | 90184                                 | SRR1969219 | 2015 | 2  | Europe        | United Kingdom | Enteritidis             | Enteritidis | 1425  | 30328 |
| SAL_BA9573AA | Ke172-sc-2012-07-27T11:51:ERR217443   |            |      |    |               |                | Enteritidis             | Enteritidis | 1424  | 30324 |
| SAL_BA9576AA | Ke169-sc-2012-07-27T11:51:ERR217442   |            |      |    |               |                | Enteritidis             | Enteritidis | 1425  | 30322 |
| SAL_BA9580AA | Ke164-sc-2012-07-27T11:51:ERR217440   |            |      |    |               |                | Enteritidis             | Enteritidis | 1425  | 30319 |

|              |                                     |            |      |    |           |                |             |             |      |       |
|--------------|-------------------------------------|------------|------|----|-----------|----------------|-------------|-------------|------|-------|
| SAL_BA9581AA | Ke163-sc-2012-07-27T11:51:ERR217439 |            |      |    |           |                | Enteritidis | Enteritidis | 1425 | 30318 |
| SAL_BA9582AA | 91269                               | SRR1969213 | 2015 | 2  | Europe    | United Kingdom | Enteritidis | Enteritidis | 1425 | 7210  |
| SAL_BA9584AA | Ke160-sc-2012-07-27T11:51:ERR217438 |            |      |    |           |                | Enteritidis | Enteritidis | 1425 | 30316 |
| SAL_BA9589AA | 43427                               | SRR1969209 | 2014 | 8  | 28 Europe | United Kingdom | Enteritidis | Enteritidis | 3888 | 30311 |
| SAL_BA9591AA | Ke152-sc-2012-07-27T11:51:ERR217435 |            |      |    |           |                | Enteritidis | Enteritidis | 1425 | 30309 |
| SAL_BA9593AA | Ke151-sc-2012-07-27T11:51:ERR217434 |            |      |    |           |                | Enteritidis | Enteritidis | 1424 | 30307 |
| SAL_BA9594AA | 34179                               | SRR1969206 | 2014 | 7  | 21 Europe | United Kingdom | Enteritidis | Enteritidis | 3888 | 30306 |
| SAL_BA9598AA | 69884                               | SRR1969204 | 2014 | 11 | Europe    | United Kingdom | Enteritidis | Enteritidis | 3888 | 30302 |
| SAL_BA9599AA | Ke143-sc-2012-07-27T11:51:ERR217431 |            |      |    |           |                | Enteritidis | Enteritidis | 1424 | 30301 |
| SAL_BA9607AA | Ke122-sc-2012-07-27T11:51:ERR217427 |            |      |    |           |                | Enteritidis | Enteritidis | 1424 | 30293 |
| SAL_BA9609AA | Ke117-sc-2012-07-27T11:51:ERR217426 |            |      |    |           |                | Enteritidis | Enteritidis | 1424 | 30292 |
| SAL_BA9613AA | 36520                               | SRR1969196 | 2014 | 8  | Europe    | United Kingdom | Enteritidis | Enteritidis | 1425 | 30289 |
| SAL_BA9615AA | 9184                                | SRR1969195 | 2014 | 5  | Europe    | United Kingdom | Enteritidis | Enteritidis | 1425 | 30288 |
| SAL_BA9617AA | 13432                               | SRR1969194 | 2014 | 5  | Europe    | United Kingdom | Enteritidis | Enteritidis | 3888 | 30287 |
| SAL_BA9621AA | 65125                               | SRR1969192 | 2014 | 11 | 4 Europe  | United Kingdom | Enteritidis | Enteritidis | 3888 | 30284 |
| SAL_BA9623AA | 96977                               | SRR1969191 | 2015 | 3  | Europe    | United Kingdom | Enteritidis | Enteritidis | 1425 | 30282 |
| SAL_BA9625AA | 39514                               | SRR1969190 | 2014 | 8  | 14 Europe | United Kingdom | Enteritidis | Enteritidis | 3888 | 30280 |
| SAL_BA9627AA | 25261                               | SRR1969189 | 2014 | 7  | Europe    | United Kingdom | Enteritidis | Enteritidis | 1425 | 30278 |
| SAL_BA9630AA | 14870                               | SRR1969187 | 2014 | 5  | Europe    | United Kingdom | Enteritidis | Enteritidis | 1425 | 30275 |
| SAL_BA9652AA | 65429                               | SRR1969176 | 2014 | 9  | Europe    | United Kingdom | Enteritidis | Enteritidis | 3888 | 7867  |
| SAL_BA9653AA | Ke048-sc-2012-07-27T11:51:ERR217405 |            |      |    |           |                | Enteritidis | Enteritidis | 1424 | 30259 |
| SAL_BA9656AA | Ke044-sc-2012-07-27T11:51:ERR217403 |            |      |    |           |                | Enteritidis | Enteritidis | 1424 | 30250 |
| SAL_BA9658AA | Ke042-sc-2012-07-27T11:51:ERR217402 |            |      |    |           |                | Enteritidis | Enteritidis | 1424 | 30256 |
| SAL_BA9661AA | 32478                               | SRR1969172 | 2014 | 7  | 17 Europe | United Kingdom | Enteritidis | Enteritidis | 3888 | 30253 |
| SAL_BA9664AA | Ke033-sc-2012-07-27T11:51:ERR217399 |            |      |    |           |                | Enteritidis | Enteritidis | 1424 | 30250 |
| SAL_BA9681AA | 83706                               | SRR1969162 | 2014 | 12 | 4 Europe  | United Kingdom | Enteritidis | Enteritidis | 1425 | 25680 |
| SAL_BA9691AA | Ke016-sc-2012-07-27T11:50:ERR217386 |            |      |    |           |                | Enteritidis | Enteritidis | 1425 | 30230 |
| SAL_BA9702AA | 40791                               | SRR1969152 | 2014 | 8  | Europe    | United Kingdom | Enteritidis | Enteritidis | 1425 | 30221 |
| SAL_BA9704AA | 86907                               | SRR1969151 | 2015 | 2  | Europe    | United Kingdom | Enteritidis | Enteritidis | 1425 | 30220 |
| SAL_BA9710AA | 37115                               | SRR1969148 | 2014 | 8  | Europe    | United Kingdom | Enteritidis | Enteritidis | 1425 | 30215 |
| SAL_BA9723AA | Ke267-sc-2012-07-27T11:52:ERR212519 |            |      |    |           |                | Enteritidis | Enteritidis | 1425 | 29967 |
| SAL_BA9730AA | 34168                               | SRR1969138 | 2014 | 7  | Europe    | United Kingdom | Enteritidis | Enteritidis | 1425 | 30202 |
| SAL_BA9736AA | 31609                               | SRR1969135 | 2014 | 7  | Europe    | United Kingdom | Enteritidis | Enteritidis | 1425 | 30199 |
| SAL_BA9738AA | 36518                               | SRR1969134 | 2014 | 7  | 23 Europe | United Kingdom | Enteritidis | Enteritidis | 3888 | 2066  |
| SAL_BA9740AA | 31964                               | SRR1969133 | 2014 | 7  | Europe    | United Kingdom | Enteritidis | Enteritidis | 1425 | 30197 |
| SAL_BA9743AA | Ke491-sc-2012-07-27T11:54:ERR212676 |            |      |    |           |                | Enteritidis | Enteritidis | 1424 | 30188 |
| SAL_BA9747AA | Ke488-sc-2012-07-27T11:54:ERR212673 |            |      |    |           |                | Enteritidis | Enteritidis | 1424 | 30191 |
| SAL_BA9748AA | 85733                               | SRR1969129 | 2015 | 2  | Europe    | United Kingdom | Enteritidis | Enteritidis | 1425 | 27537 |
| SAL_BA9749AA | Ke486-sc-2012-07-27T11:54:ERR212671 |            |      |    |           |                | Enteritidis | Enteritidis | 1425 | 30190 |
| SAL_BA9750AA | 57109                               | SRR1969128 | 2014 | 8  | Europe    | United Kingdom | Enteritidis | Enteritidis | 1425 | 30189 |
| SAL_BA9751AA | Ke485-sc-2012-07-27T11:54:ERR212670 |            |      |    |           |                | Enteritidis | Enteritidis | 1424 | 30188 |
| SAL_BA9753AA | Ke484-sc-2012-07-27T11:54:ERR212669 |            |      |    |           |                | Enteritidis | Enteritidis | 1424 | 30186 |
| SAL_BA9758AA | 36494                               | SRR1969124 | 2014 | 7  | Europe    | United Kingdom | Enteritidis | Enteritidis | 1425 | 7771  |
| SAL_BA9760AA | 37011                               | SRR1969123 | 2014 | 8  | Europe    | United Kingdom | Enteritidis | Enteritidis | 1425 | 30180 |
| SAL_BA9766AA | 53132                               | SRR1969120 | 2014 | 9  | Europe    | United Kingdom | Enteritidis | Enteritidis | 1425 | 30175 |
| SAL_BA9770AA | 72265                               | SRR1969118 | 2014 | 12 | Europe    | United Kingdom | Enteritidis | Enteritidis | 3888 | 3630  |
| SAL_BA9773AA | 38321                               | SRR1969116 | 2014 | 8  | Europe    | United Kingdom | Enteritidis | Enteritidis | 1425 | 30171 |
| SAL_BA9775AA | 52964                               | SRR1969115 | 2014 | 9  | Europe    | United Kingdom | Enteritidis | Enteritidis | 1425 | 30169 |
| SAL_BA9779AA | 50872                               | SRR1969113 | 2014 | 9  | Europe    | United Kingdom | Enteritidis | Enteritidis | 1425 | 30165 |
| SAL_BA9791AA | 68695                               | SRR1969107 | 2014 | 11 | Europe    | United Kingdom | Enteritidis | Enteritidis | 3888 | 30158 |
| SAL_BA9799AA | 38781                               | SRR1969103 | 2014 | 8  | Europe    | United Kingdom | Enteritidis | Enteritidis | 1425 | 30152 |
| SAL_BA9814AA | 83590                               | SRR1969095 | 2015 | 1  | Europe    | United Kingdom | Enteritidis | Enteritidis | 1425 | 29703 |
| SAL_BA9819AA | 27801                               | SRR1969078 | 2014 | 7  | Europe    | United Kingdom | Enteritidis | Enteritidis | 1425 | 30138 |
| SAL_BA9820AA | Ke448-sc-2012-07-27T11:53:ERR212633 |            |      |    |           |                | Enteritidis | Enteritidis | 1424 | 30136 |
| SAL_BA9822AA | 34181                               | SRR1969076 | 2014 | 7  | 22 Europe | United Kingdom | Enteritidis | Enteritidis | 3888 | 30135 |
| SAL_BA9825AA | Ke445-sc-2012-07-27T11:53:ERR212630 |            |      |    |           |                | Enteritidis | Enteritidis | 1425 | 30132 |
| SAL_BA9834AA | 46586                               | SRR1969069 | 2014 | 7  | 14 Europe | United Kingdom | Enteritidis | Enteritidis | 3888 | 30125 |
| SAL_BA9836AA | 57110                               | SRR1969068 | 2014 | 8  | 1 Europe  | United Kingdom | Enteritidis | Enteritidis | 3888 | 30124 |
| SAL_BA9844AA | 13810                               | SRR1969064 | 2014 | 5  | Europe    | United Kingdom | Enteritidis | Enteritidis | 1425 | 30119 |

|              |                                     |            |      |    |           |                |             |             |       |       |
|--------------|-------------------------------------|------------|------|----|-----------|----------------|-------------|-------------|-------|-------|
| SAL_BA9846AA | 23503                               | SRR1969063 | 2014 | 6  | Europe    | United Kingdom | Enteritidis | Enteritidis | 1425  | 30117 |
| SAL_BA9847AA | Ke434-sc-2012-07-27T11:53:ERR212619 |            |      |    |           |                | Enteritidis | Enteritidis | 1424  | 30116 |
| SAL_BA9848AA | 27794                               | SRR1969062 | 2014 | 7  | Europe    | United Kingdom | Enteritidis | Enteritidis | 1425  | 30115 |
| SAL_BA9850AA | 40272                               | SRR1969061 | 2014 | 8  | Europe    | United Kingdom | Enteritidis | Enteritidis | 3906  | 30113 |
| SAL_BA9856AA | 31657                               | SRR1969057 | 2014 | 7  | Europe    | United Kingdom | Enteritidis | Enteritidis | 26543 | 30107 |
| SAL_BA9872AA | Ke422-sc-2012-07-27T11:53:ERR212607 |            |      |    |           |                | Enteritidis | Enteritidis | 1425  | 30096 |
| SAL_BA9881AA | Ke417-sc-2012-07-27T11:53:ERR212602 |            |      |    |           |                | Enteritidis | Enteritidis | 1424  | 30088 |
| SAL_BA9882AA | 65055                               | SRR1969043 | 2014 | 11 | Europe    | United Kingdom | Enteritidis | Enteritidis | 1425  | 29851 |
| SAL_BA9896AA | 38330                               | SRR1969036 | 2014 | 8  | Europe    | United Kingdom | Enteritidis | Enteritidis | 1425  | 30074 |
| SAL_BA9897AA | Ke409-sc-2012-07-27T11:53:ERR212594 |            |      |    |           |                | Enteritidis | Enteritidis | 1425  | 30073 |
| SAL_BA9902AA | 38767                               | SRR1969033 | 2014 | 8  | Europe    | United Kingdom | Enteritidis | Enteritidis | 1425  | 20758 |
| SAL_BA9907AA | 84460                               | SRR1969031 | 2015 | 2  | Europe    | United Kingdom | Enteritidis | Enteritidis | 1425  | 30066 |
| SAL_BA9923AA | 36395                               | SRR1969024 | 2014 | 8  | 3 Europe  | United Kingdom | Enteritidis | Enteritidis | 3888  | 30055 |
| SAL_BA9933AA | 34183                               | SRR1969018 | 2014 | 7  | Europe    | United Kingdom | Enteritidis | Enteritidis | 3888  | 30047 |
| SAL_BA9938AA | 24039                               | SRR1969015 | 2014 | 6  | 23 Europe | United Kingdom | Enteritidis | Enteritidis | 3888  | 30043 |
| SAL_BA9946AA | 14133                               | SRR1969011 | 2014 | 5  | Europe    | United Kingdom | Enteritidis | Enteritidis | 3888  | 30037 |
| SAL_BA9958AA | 27797                               | SRR1969004 | 2014 | 6  | 27 Europe | United Kingdom | Enteritidis | Enteritidis | 3888  | 30026 |
| SAL_BA9960AA | 23493                               | SRR1969003 | 2014 | 6  | 19 Europe | United Kingdom | Enteritidis | Enteritidis | 3888  | 30024 |
| SAL_BA9962AA | 32471                               | SRR1969002 | 2014 | 7  | 20 Europe | United Kingdom | Enteritidis | Enteritidis | 3888  | 30022 |
| SAL_BA9970AA | 38413                               | SRR1968998 | 2014 | 8  | Europe    | United Kingdom | Enteritidis | Enteritidis | 1425  | 30015 |
| SAL_BA9978AA | 36495                               | SRR1968994 | 2014 | 7  | Europe    | United Kingdom | Enteritidis | Enteritidis | 1425  | 30007 |
| SAL_BA9986AA | 26637                               | SRR1968990 | 2014 | 7  | Europe    | United Kingdom | Enteritidis | Enteritidis | 1425  | 30001 |
| SAL_BA9997AA | 12131                               | SRR1968985 | 2014 | 5  | Europe    | United Kingdom | Enteritidis | Enteritidis | 1425  | 29993 |
| SAL_BA9999AA | 31618                               | SRR1968984 | 2014 | 7  | Europe    | United Kingdom | Enteritidis | Enteritidis | 1425  | 29992 |
| SAL_CA0006AA | Ke304-sc-2012-07-27T11:52:ERR212539 |            |      |    |           |                | Enteritidis | Enteritidis | 1425  | 29988 |
| SAL_CA0009AA | 46012                               | SRR1968978 | 2014 | 8  | Europe    | United Kingdom | Enteritidis | Enteritidis | 1425  | 26972 |
| SAL_CA0011AA | 93572                               | SRR1968977 | 2015 | 3  | Europe    | United Kingdom | Enteritidis | Enteritidis | 28005 | 26420 |
| SAL_CA0014AA | 46004                               | SRR1968976 | 2014 | 8  | Europe    | United Kingdom | Enteritidis | Enteritidis | 1425  | 29985 |
| SAL_CA0018AA | 45998                               | SRR1968974 | 2014 | 8  | Europe    | United Kingdom | Enteritidis | Enteritidis | 3888  | 29982 |
| SAL_CA0020AA | 36387                               | SRR1968973 | 2014 | 8  | Europe    | United Kingdom | Enteritidis | Enteritidis | 1425  | 29980 |
| SAL_CA0021AA | Ke292-sc-2012-07-27T11:52:ERR212531 |            |      |    |           |                | Enteritidis | Enteritidis | 1425  | 29979 |
| SAL_CA0022AA | 31623                               | SRR1968972 | 2014 | 7  | 9 Europe  | United Kingdom | Enteritidis | Enteritidis | 3888  | 29978 |
| SAL_CA0028AA | 65047                               | SRR1968969 | 2014 | 11 | Europe    | United Kingdom | Enteritidis | Enteritidis | 1425  | 25223 |
| SAL_CA0029AA | Ke288-sc-2012-07-27T11:52:ERR212527 |            |      |    |           |                | Typhimurium | Enteritidis | 1425  | 29972 |
| SAL_CA0034AA | Ke276-sc-2012-07-27T11:52:ERR212524 |            |      |    |           |                | Enteritidis | Enteritidis | 1425  | 29967 |
| SAL_CA0079AA | 29386                               | SRR1968943 | 2014 | 7  | Europe    | United Kingdom | Enteritidis | Enteritidis | 1425  | 29927 |
| SAL_CA0089AA | 39482                               | SRR1968938 | 2014 | 8  | Europe    | United Kingdom | Enteritidis | Enteritidis | 3888  | 29919 |
| SAL_CA0094AA | 63660                               | SRR1968935 | 2014 | 10 | Europe    | United Kingdom | Enteritidis | Enteritidis | 1425  | 29914 |
| SAL_CA0102AA | 37036                               | SRR1968931 | 2014 | 8  | Europe    | France         | Enteritidis | Enteritidis | 3888  | 551   |
| SAL_CA0106AA | 38369                               | SRR1968929 | 2014 | 7  | 30 Europe | United Kingdom | Enteritidis | Enteritidis | 3888  | 29905 |
| SAL_CA0110AA | 36390                               | SRR1968927 | 2014 | 8  | Europe    | United Kingdom | Enteritidis | Enteritidis | 1425  | 29901 |
| SAL_CA0112AA | 99782                               | SRR1968926 | 2015 | 3  | Europe    | United Kingdom | Enteritidis | Enteritidis | 3888  | 26603 |
| SAL_CA0119AA | 96972                               | SRR1968922 | 2015 | 3  | Europe    | United Kingdom | Enteritidis | Enteritidis | 1425  | 7575  |
| SAL_CA0125AA | 40249                               | SRR1968919 | 2014 | 8  | Europe    | United Kingdom | Enteritidis | Enteritidis | 26481 | 29890 |
| SAL_CA0129AA | 84447                               | SRR1968917 | 2015 | 2  | Europe    | United Kingdom | Enteritidis | Enteritidis | 1425  | 2277  |
| SAL_CA0138AA | 40795                               | SRR1968912 | 2014 | 8  | 15 Europe | United Kingdom | Enteritidis | Enteritidis | 3888  | 25250 |
| SAL_CA0140AA | 60098                               | SRR1968911 | 2014 | 10 | Europe    | United Kingdom | Enteritidis | Enteritidis | 1425  | 29880 |
| SAL_CA0150AA | 34177                               | SRR1968906 | 2014 | 7  | 22 Europe | United Kingdom | Enteritidis | Enteritidis | 3888  | 7153  |
| SAL_CA0161AA | 37800                               | SRR1968900 | 2014 | 7  | 29 Europe | United Kingdom | Enteritidis | Enteritidis | 3888  | 29862 |
| SAL_CA0163AA | 34175                               | SRR1968899 | 2014 | 7  | 22 Europe | United Kingdom | Enteritidis | Enteritidis | 3888  | 29860 |
| SAL_CA0177AA | 65054                               | SRR1968892 | 2014 | 11 | Europe    | United Kingdom | Enteritidis | Enteritidis | 1425  | 29851 |
| SAL_CA0184AA | 32524                               | SRR1968889 | 2014 | 7  | Europe    | United Kingdom | Enteritidis | Enteritidis | 1425  | 26210 |
| SAL_CA0186AA | 38783                               | SRR1968888 | 2014 | 8  | Europe    | United Kingdom | Enteritidis | Enteritidis | 3888  | 29846 |
| SAL_CA0188AA | 99073                               | SRR1968887 | 2015 | 3  | Europe    | United Kingdom | Enteritidis | Enteritidis | 1425  | 503   |
| SAL_CA0199AA | 41984                               | SRR1968882 | 2014 | 8  | 14 Europe | United Kingdom | Enteritidis | Enteritidis | 3888  | 29839 |
| SAL_CA0204AA | 73137                               | SRR1968880 | 2014 | 12 | Europe    | United Kingdom | Enteritidis | Enteritidis | 1425  | 6917  |
| SAL_CA0229AA | 45615                               | SRR1968869 | 2014 | 9  | Europe    | United Kingdom | Enteritidis | Enteritidis | 1425  | 24676 |
| SAL_CA0240AA | 31930                               | SRR1968863 | 2014 | 7  | Europe    | United Kingdom | Enteritidis | Enteritidis | 3888  | 29815 |
| SAL_CA0244AA | 23462                               | SRR1968861 | 2014 | 6  | 10 Europe | United Kingdom | Enteritidis | Enteritidis | 3888  | 29811 |

|              |        |            |      |    |           |                |                         |             |       |       |
|--------------|--------|------------|------|----|-----------|----------------|-------------------------|-------------|-------|-------|
| SAL_CA0253AA | 65126  | SRR1968857 | 2014 | 11 | Europe    | United Kingdom | Enteritidis             | Enteritidis | 26481 | 29803 |
| SAL_CA0257AA | 21788  | SRR1968855 | 2014 | 6  | Europe    | United Kingdom | Enteritidis             | Enteritidis | 3888  | 29800 |
| SAL_CA0261AA | 14132  | SRR1968853 | 2014 | 5  | Europe    | United Kingdom | Enteritidis             | Enteritidis | 1425  | 29797 |
| SAL_CA0266AA | 13861  | SRR1968851 | 2014 | 5  | Europe    | United Kingdom | Enteritidis             | Enteritidis | 1425  | 29794 |
| SAL_CA0278AA | 13859  | SRR1968845 | 2014 | 5  | Europe    | United Kingdom | Enteritidis             | Enteritidis | 1425  | 29783 |
| SAL_CA0292AA | 12189  | SRR1968839 | 2014 | 5  | Europe    | United Kingdom | Enteritidis             | Enteritidis | 1425  | 29771 |
| SAL_CA0302AA | 83302  | SRR1968834 | 2015 | 1  | Europe    | United Kingdom | Enteritidis             | Enteritidis | 3888  | 3635  |
| SAL_CA0306AA | 38325  | SRR1968832 | 2014 | 7  | 30 Europe | United Kingdom | Enteritidis             | Enteritidis | 3888  | 29759 |
| SAL_CA0308AA | 52978  | SRR1968831 | 2014 | 10 | Europe    | United Kingdom | Enteritidis             | Enteritidis | 1425  | 29757 |
| SAL_CA0311AA | 65394  | SRR1968829 | 2014 | 10 | Europe    | United Kingdom | Enteritidis             | Enteritidis | 1425  | 24726 |
| SAL_CA0315AA | 94090  | SRR1968827 | 2015 | 3  | Europe    | United Kingdom | Enteritidis             | Enteritidis | 1425  | 29752 |
| SAL_CA0317AA | 38310  | SRR1968826 | 2014 | 8  | Europe    | United Kingdom | Enteritidis             | Enteritidis | 1425  | 29750 |
| SAL_CA0348AA | 9281   | SRR1968811 | 2014 | 5  | Europe    | United Kingdom | Enteritidis             | Enteritidis | 1425  | 29722 |
| SAL_CA0356AA | 13835  | SRR1968807 | 2014 | 5  | 15 Europe | United Kingdom | Enteritidis             | Enteritidis | 3888  | 29715 |
| SAL_CA0358AA | 21782  | SRR1968806 | 2014 | 6  | 2 Europe  | United Kingdom | Enteritidis             | Enteritidis | 3888  | 29714 |
| SAL_CA0368AA | 56158  | SRR1968801 | 2014 | 9  | Europe    | United Kingdom | Enteritidis             | Enteritidis | 3888  | 7867  |
| SAL_CA0370AA | 83725  | SRR1968800 | 2015 | 1  | Europe    | United Kingdom | Enteritidis             | Enteritidis | 1425  | 29703 |
| SAL_CA0378AA | 37811  | SRR1968796 | 2014 | 7  | 28 Europe | United Kingdom | Enteritidis             | Enteritidis | 3888  | 29695 |
| SAL_CA0389AA | 23057  | SRR1968791 | 2014 | 6  | 7 Europe  | United Kingdom | Enteritidis             | Enteritidis | 3888  | 29684 |
| SAL_CA0399AA | 65334  | SRR1968786 | 2014 | 9  | Europe    | United Kingdom | Enteritidis             | Enteritidis | 1425  | 28868 |
| SAL_CA0401AA | 37037  | SRR1968785 | 2014 | 8  | Europe    | France         | Enteritidis             | Enteritidis | 3888  | 29673 |
| SAL_CA0405AA | 65050  | SRR1968783 | 2014 | 11 | Europe    | United Kingdom | Enteritidis             | Enteritidis | 1425  | 29669 |
| SAL_CA0407AA | 65105  | SRR1968782 | 2014 | 10 | Europe    | United Kingdom | Enteritidis             | Enteritidis | 3888  | 29667 |
| SAL_CA0411AA | 68689  | SRR1968780 | 2014 | 11 | 12 Europe | United Kingdom | Enteritidis             | Enteritidis | 28536 | 29663 |
| SAL_CA0413AA | 40236  | SRR1968779 | 2014 | 8  | Europe    | United Kingdom | Enteritidis             | Enteritidis | 1425  | 29661 |
| SAL_CA0414AA | 36477  | SRR1968778 | 2014 | 7  | 21 Europe | United Kingdom | Enteritidis             | Enteritidis | 3888  | 2066  |
| SAL_CA0417AA | 23470  | SRR1968777 | 2014 | 6  | Europe    | United Kingdom | Enteritidis             | Enteritidis | 1425  | 29658 |
| SAL_CA0443AA | 63902  | SRR1968764 | 2014 | 11 | Europe    | United Kingdom | Enteritidis             | Enteritidis | 1425  | 29634 |
| SAL_CA0451AA | 38306  | SRR1968760 | 2014 | 8  | Europe    | United Kingdom | Enteritidis             | Enteritidis | 1425  | 29628 |
| SAL_CA0455AA | 45617  | SRR1968758 | 2014 | 9  | Europe    | United Kingdom | Enteritidis             | Enteritidis | 3888  | 29624 |
| SAL_CA0461AA | 46011  | SRR1968755 | 2014 | 8  | 9 Europe  | United Kingdom | Enteritidis             | Enteritidis | 3888  | 2066  |
| SAL_CA0467AA | 36393  | SRR1968751 | 2014 | 8  | Europe    | United Kingdom | Enteritidis             | Enteritidis | 1425  | 29617 |
| SAL_CA0472AA | 31966  | SRR1968746 | 2014 | 7  | 25 Europe | United Kingdom | Enteritidis             | Enteritidis | 3888  | 29612 |
| SAL_CA0473AA | 6447   | SRR1968745 | 2014 | 4  | Europe    | United Kingdom | Enteritidis             | Enteritidis | 1425  | 29611 |
| SAL_CA0475AA | 34191  | SRR1968743 | 2014 | 7  | 29 Europe | United Kingdom | Enteritidis             | Enteritidis | 1425  | 29609 |
| SAL_CA0492AA | 60141  | SRR1968734 | 2014 | 10 | Europe    | United Kingdom | Enteritidis             | Enteritidis | 1425  | 29598 |
| SAL_CA0496AA | 40366  | SRR1968732 | 2014 | 8  | 28 Europe | United Kingdom | Enteritidis             | Enteritidis | 1425  | 29594 |
| SAL_CA0502AA | 68703  | SRR1968729 | 2014 | 11 | Europe    | United Kingdom | Kisangani               | Enteritidis | 1425  | 29589 |
| SAL_CA0505AA | 94263  | SRR1968728 | 2015 | 3  | Europe    | United Kingdom | Enteritidis             | Enteritidis | 1425  | 29586 |
| SAL_CA0509AA | 51242  | SRR1968726 | 2014 | 9  | Europe    | United Kingdom | Enteritidis             | Enteritidis | 1425  | 24690 |
| SAL_CA0544AA | 50335  | SRR1968709 | 2014 | 9  | Europe    | United Kingdom | Enteritidis             | Enteritidis | 3888  | 7867  |
| SAL_CA0560AA | 31924  | SRR1968701 | 2014 | 7  | Europe    | United Kingdom | Enteritidis             | Enteritidis | 3888  | 29540 |
| SAL_CA0570AA | 36386  | SRR1968696 | 2014 | 8  | Europe    | United Kingdom | Enteritidis             | Enteritidis | 1425  | 26244 |
| SAL_CA0585AA | 14540  | SRR1968688 | 2014 | 5  | Europe    | United Kingdom | Enteritidis             | Enteritidis | 1425  | 29522 |
| SAL_CA0587AA | 27978  | SRR1968686 | 2014 | 7  | Europe    | United Kingdom | Enteritidis             | Enteritidis | 1425  | 29520 |
| SAL_CA0593AA | 27063  | SRR1968683 | 2014 | 7  | Europe    | United Kingdom | Enteritidis             | Enteritidis | 3888  | 29515 |
| SAL_CA0597AA | 25227  | SRR1968681 | 2014 | 7  | Europe    | United Kingdom | Enteritidis             | Enteritidis | 1425  | 29511 |
| SAL_CA0607AA | 31656  | SRR1968675 | 2014 | 7  | 10 Europe | United Kingdom | Enteritidis             | Enteritidis | 3888  | 29502 |
| SAL_CA0618AA | 41989  | SRR1968667 | 2014 | 8  | Europe    | United Kingdom | Enteritidis             | Enteritidis | 1425  | 29497 |
| SAL_CA0634AA | 36475  | SRR1968659 | 2014 | 7  | 21 Europe | United Kingdom | Enteritidis             | Enteritidis | 3888  | 29482 |
| SAL_CA0636AA | 40276  | SRR1968658 | 2014 | 8  | Europe    | United Kingdom | Enteritidis             | Enteritidis | 1425  | 29480 |
| SAL_CA0644AA | 38344  | SRR1968654 | 2014 | 7  | 28 Europe | United Kingdom | Enteritidis             | Enteritidis | 3888  | 26229 |
| SAL_CA0646AA | 39516  | SRR1968653 | 2014 | 8  | Europe    | United Kingdom | Enteritidis             | Enteritidis | 1425  | 29471 |
| SAL_CA0650AA | 25266  | SRR1968651 | 2014 | 7  | 1 Europe  | United Kingdom | Enteritidis             | Enteritidis | 3888  | 512   |
| SAL_CA0656AA | 42002  | SRR1968648 | 2014 | 8  | Europe    | United Kingdom | Enteritidis             | Enteritidis | 1425  | 29464 |
| SAL_CA0666AA | 83726  | SRR1968641 | 2015 | 1  | Europe    | United Kingdom | Enteritidis             | Enteritidis | 1425  | 29456 |
| SAL_CA0668AA | 46013  | SRR1968640 | 2014 | 8  | Europe    | United Kingdom | Enteritidis             | Enteritidis | 1425  | 29454 |
| SAL_CA0682AA | 24052  | SRR1968633 | 2014 | 6  | Europe    | United Kingdom | Enteritidis             | Enteritidis | 1425  | 29441 |
| SAL_CA0685AA | JT1409 | ERR018882  |      |    |           |                | Enteritidis (Predicted) | Enteritidis | 1425  | 29439 |



|              |             |            |      |    |               |                |             |             |       |       |
|--------------|-------------|------------|------|----|---------------|----------------|-------------|-------------|-------|-------|
| SAL_CA0686AA | 23498       | SRR1968631 | 2014 | 6  | Europe        | United Kingdom | Enteritidis | Enteritidis | 1425  | 29438 |
| SAL_CA0694AA | 37813       | SRR1968627 | 2014 | 7  | 31 Europe     | United Kingdom | Enteritidis | Enteritidis | 3888  | 29430 |
| SAL_CA0697AA | 38427       | SRR1968626 | 2014 | 8  | Europe        | United Kingdom | Enteritidis | Enteritidis | 1425  | 29427 |
| SAL_CA0699AA | 37008       | SRR1968625 | 2014 | 8  | Europe        | United Kingdom | Enteritidis | Enteritidis | 1425  | 29425 |
| SAL_CA0704AA | 65128       | SRR1968622 | 2014 | 11 | Europe        | United Kingdom | Enteritidis | Enteritidis | 1425  | 26283 |
| SAL_CA0708AA | 25343       | SRR1968620 | 2014 | 7  | Europe        | United Kingdom | Enteritidis | Enteritidis | 1425  | 29417 |
| SAL_CA0716AA | 34207       | SRR1968616 | 2014 | 7  | Europe        | United Kingdom | Enteritidis | Enteritidis | 1425  | 25842 |
| SAL_CA0720AA | 40274       | SRR1968614 | 2014 | 8  | 11 Europe     | United Kingdom | Enteritidis | Enteritidis | 3888  | 29406 |
| SAL_CA0735AA | 45613       | SRR1968606 | 2014 | 9  | Europe        | United Kingdom | Enteritidis | Enteritidis | 1425  | 29393 |
| SAL_CA0741AA | 65434       | SRR1968603 | 2014 | 9  | 30 Europe     | United Kingdom | Enteritidis | Enteritidis | 3888  | 7317  |
| SAL_CA0743AA | 63631       | SRR1968602 | 2014 | 10 | Europe        | United Kingdom | Enteritidis | Enteritidis | 1425  | 24879 |
| SAL_CA0763AA | 34188       | SRR1968592 | 2014 | 7  | 25 Europe     | United Kingdom | Enteritidis | Enteritidis | 3888  | 29369 |
| SAL_CA0768AA | 27979       | SRR1968590 | 2014 | 7  | Europe        | United Kingdom | Enteritidis | Enteritidis | 1425  | 29365 |
| SAL_CA0770AA | 38422       | SRR1968589 | 2014 | 7  | 25 Europe     | United Kingdom | Enteritidis | Enteritidis | 3888  | 29363 |
| SAL_CA0776AA | 69900       | SRR1968586 | 2014 | 11 | Europe        | United Kingdom | Enteritidis | Enteritidis | 3888  | 29358 |
| SAL_CA0780AA | 27014       | SRR1968584 | 2014 | 7  | Europe        | United Kingdom | Enteritidis | Enteritidis | 1425  | 29354 |
| SAL_CA0795AA | 39435       | SRR1968577 | 2014 | 6  | Europe        | United Kingdom | Enteritidis | Enteritidis | 1425  | 29340 |
| SAL_CA0797AA | 9178        | SRR1968576 | 2014 | 5  | Europe        | United Kingdom | Enteritidis | Enteritidis | 1425  | 29338 |
| SAL_CA0817AA | 68693       | SRR1968566 | 2014 | 11 | Europe        | United Kingdom | Enteritidis | Enteritidis | 1425  | 29320 |
| SAL_CA0821AA | 31972       | SRR1968564 | 2014 | 7  | 25 Europe     | United Kingdom | Enteritidis | Enteritidis | 3888  | 2066  |
| SAL_CA0835AA | 61837       | SRR1968557 | 2014 | 10 | Europe        | United Kingdom | Enteritidis | Enteritidis | 1425  | 25076 |
| SAL_CA0837AA | 37825       | SRR1968556 | 2014 | 7  | 28 Europe     | United Kingdom | Enteritidis | Enteritidis | 3888  | 29305 |
| SAL_CA0844AA | 36364       | SRR1968553 | 2014 | 7  | 30 Europe     | United Kingdom | Enteritidis | Enteritidis | 3888  | 514   |
| SAL_CA0848AA | 38408       | SRR1968551 | 2014 | 8  | Europe        | United Kingdom | Enteritidis | Enteritidis | 1425  | 29301 |
| SAL_CA0859AA | 67565       | SRR1968544 | 2014 | 11 | Europe        | United Kingdom | Enteritidis | Enteritidis | 1425  | 25142 |
| SAL_CA0860AA | 99785       | SRR1968543 | 2015 | 3  | Europe        | United Kingdom | Enteritidis | Enteritidis | 3888  | 29293 |
| SAL_CA0866AA | 84439       | SRR1968539 | 2015 | 2  | Europe        | United Kingdom | Enteritidis | Enteritidis | 1425  | 29287 |
| SAL_CA0885AA | 37817       | SRR1968529 | 2014 | 7  | 26 Europe     | United Kingdom | Enteritidis | Enteritidis | 3888  | 27851 |
| SAL_CA0894AA | CFSAN002046 | SRR749062  |      |    | North America | Mexico         | Enteritidis | Enteritidis | 1425  | 29263 |
| SAL_CA0896AA | CFSAN002045 | SRR749061  |      |    | North America | United States  | Enteritidis | Enteritidis | 1425  | 29261 |
| SAL_CA0898AA | CFSAN002044 | SRR749060  |      |    | North America | United States  | Enteritidis | Enteritidis | 3801  | 29259 |
| SAL_CA0903AA | 40224       | SRR1968520 | 2014 | 8  | 13 Europe     | United Kingdom | Enteritidis | Enteritidis | 3888  | 29255 |
| SAL_CA0907AA | 40235       | SRR1968516 | 2014 | 8  | 12 Europe     | United Kingdom | Enteritidis | Enteritidis | 3888  | 29251 |
| SAL_CA0914AA | 23508       | SRR1968511 | 2014 | 6  | 25 Europe     | United Kingdom | Enteritidis | Enteritidis | 1425  | 29244 |
| SAL_CA1024AA | 52974       | SRR1968508 | 2014 | 10 | Europe        | United Kingdom | Enteritidis | Enteritidis | 3888  | 29241 |
| SAL_CA1030AA | 73138       | SRR1968505 | 2014 | 12 | Europe        | United Kingdom | Enteritidis | Enteritidis | 1425  | 29237 |
| SAL_CA1051AA | 84472       | SRR1968495 | 2015 | 2  | Europe        | United Kingdom | Enteritidis | Enteritidis | 1425  | 29230 |
| SAL_CA1058AA | 45611       | SRR1968492 | 2014 | 9  | Europe        | United Kingdom | Enteritidis | Enteritidis | 1425  | 24690 |
| SAL_CA1067AA | 31918       | SRR1968488 | 2014 | 7  | Europe        | United Kingdom | Enteritidis | Enteritidis | 8003  | 29225 |
| SAL_CA1071AA | 46579       | SRR1968486 | 2014 | 7  | 17 Europe     | United Kingdom | Enteritidis | Enteritidis | 3888  | 29224 |
| SAL_CA1075AA | 27962       | SRR1968484 | 2014 | 7  | Europe        | United Kingdom | Enteritidis | Enteritidis | 1425  | 29221 |
| SAL_CA1093AA | 31975       | SRR1968475 | 2014 | 7  | 25 Europe     | United Kingdom | Enteritidis | Enteritidis | 3888  | 29212 |
| SAL_CA1104AA | 34192       | SRR1968470 | 2014 | 7  | Europe        | United Kingdom | Enteritidis | Enteritidis | 1425  | 29207 |
| SAL_CA1111AA | 6449        | SRR1968467 | 2014 | 4  | Europe        | United Kingdom | Enteritidis | Enteritidis | 1425  | 29204 |
| SAL_CA1117AA | 63735       | SRR1968464 | 2014 | 10 | Europe        | United Kingdom | Enteritidis | Enteritidis | 1425  | 24563 |
| SAL_CA1119AA | 13857       | SRR1968463 | 2014 | 5  | Europe        | United Kingdom | Enteritidis | Enteritidis | 1425  | 29201 |
| SAL_CA1122AA | 50358       | SRR1968462 | 2014 | 9  | Europe        | United Kingdom | Enteritidis | Enteritidis | 3888  | 29200 |
| SAL_CA1133AA | 89883       | SRR1968452 | 2015 | 2  | Europe        | United Kingdom | Enteritidis | Enteritidis | 1425  | 29190 |
| SAL_CA1142AA | 63645       | SRR1968443 | 2014 | 10 | Europe        | United Kingdom | Enteritidis | Enteritidis | 1425  | 29183 |
| SAL_CA1145AA | 24983       | SRR1968440 | 2014 | 7  | Europe        | United Kingdom | Enteritidis | Enteritidis | 3888  | 29180 |
| SAL_CA1154AA | 9282        | SRR1968431 | 2014 | 5  | Europe        | United Kingdom | Enteritidis | Enteritidis | 1425  | 29171 |
| SAL_CA1156AA | 38367       | SRR1968429 | 2014 | 8  | Europe        | United Kingdom | Enteritidis | Enteritidis | 1425  | 29169 |
| SAL_CA1157AA | 25268       | SRR1968428 | 2014 | 7  | Europe        | United Kingdom | Enteritidis | Enteritidis | 1425  | 29168 |
| SAL_CA1162AA | 34203       | SRR1968423 | 2014 | 7  | 21 Europe     | United Kingdom | Enteritidis | Enteritidis | 3888  | 29164 |
| SAL_CA1163AA | 5914        | SRR1968422 | 2014 | 4  | Europe        | United Kingdom | Enteritidis | Enteritidis | 1425  | 29163 |
| SAL_CA1168AA | 13389       | SRR1968417 | 2014 | 5  | 12 Europe     | United Kingdom | Enteritidis | Enteritidis | 3888  | 29158 |
| SAL_CA1171AA | 39437       | SRR1968414 | 2014 | 6  | Europe        | United Kingdom | Enteritidis | Enteritidis | 26142 | 29155 |
| SAL_CA1172AA | 31979       | SRR1968413 | 2014 | 7  | Europe        | United Kingdom | Enteritidis | Enteritidis | 1425  | 29154 |
| SAL_CA1176AA | 96957       | SRR1968409 | 2015 | 3  | Europe        | United Kingdom | Enteritidis | Enteritidis | 1425  | 29150 |

|              |       |            |      |    |    |        |                |             |             |       |       |
|--------------|-------|------------|------|----|----|--------|----------------|-------------|-------------|-------|-------|
| SAL_CA1179AA | 39508 | SRR1968406 | 2014 | 8  | 18 | Europe | United Kingdom | Enteritidis | Enteritidis | 28525 | 29147 |
| SAL_CA1184AA | 39479 | SRR1968401 | 2014 | 8  |    | Europe | United Kingdom | Enteritidis | Enteritidis | 1425  | 29142 |
| SAL_CA1186AA | 40280 | SRR1968399 | 2014 | 8  | 19 | Europe | United Kingdom | Enteritidis | Enteritidis | 1425  | 29141 |
| SAL_CA1190AA | 5373  | SRR1968395 | 2014 | 4  |    | Europe | United Kingdom | Enteritidis | Enteritidis | 1425  | 6917  |
| SAL_CA1197AA | 99053 | SRR1968388 | 2015 | 3  |    | Europe | United Kingdom | Enteritidis | Enteritidis | 1425  | 29131 |
| SAL_CA1211AA | 69284 | SRR1968374 | 2014 | 11 |    | Europe | United Kingdom | Enteritidis | Enteritidis | 3888  | 3621  |
| SAL_CA1215AA | 23497 | SRR1968370 | 2014 | 6  |    | Europe | United Kingdom | Enteritidis | Enteritidis | 1425  | 29117 |
| SAL_CA1216AA | 98245 | SRR1968369 | 2015 | 3  |    | Europe | United Kingdom | Enteritidis | Enteritidis | 1425  | 29116 |
| SAL_CA1218AA | 27005 | SRR1968367 | 2014 | 7  |    | Europe | United Kingdom | Enteritidis | Enteritidis | 1425  | 29114 |
| SAL_CA1227AA | 40326 | SRR1968358 | 2014 | 8  |    | Europe | United Kingdom | Enteritidis | Enteritidis | 3888  | 29107 |
| SAL_CA1229AA | 23491 | SRR1968356 | 2014 | 6  |    | Europe | United Kingdom | Enteritidis | Enteritidis | 1425  | 29104 |
| SAL_CA1230AA | 63628 | SRR1968355 | 2014 | 10 |    | Europe | United Kingdom | Enteritidis | Enteritidis | 1425  | 29103 |
| SAL_CA1231AA | 25347 | SRR1968354 | 2014 | 7  |    | Europe | United Kingdom | Enteritidis | Enteritidis | 1425  | 29102 |
| SAL_CA1236AA | 39440 | SRR1968349 | 2014 | 7  |    | Europe | United Kingdom | Enteritidis | Enteritidis | 1425  | 29097 |
| SAL_CA1237AA | 9298  | SRR1968348 | 2014 | 5  |    | Europe | United Kingdom | Enteritidis | Enteritidis | 1425  | 29096 |
| SAL_CA1239AA | 50879 | SRR1968346 | 2014 | 9  |    | Europe | United Kingdom | Enteritidis | Enteritidis | 3888  | 29094 |
| SAL_CA1240AA | 45968 | SRR1968345 | 2014 | 7  |    | Europe | United Kingdom | Enteritidis | Enteritidis | 1425  | 29022 |
| SAL_CA1246AA | 96241 | SRR1968339 | 2015 | 3  |    | Europe | United Kingdom | Enteritidis | Enteritidis | 1425  | 29089 |
| SAL_CA1253AA | 46590 | SRR1968332 | 2014 | 7  | 17 | Europe | United Kingdom | Enteritidis | Enteritidis | 3888  | 29082 |
| SAL_CA1258AA | 31965 | SRR1968329 | 2014 | 7  | 25 | Europe | United Kingdom | Enteritidis | Enteritidis | 3888  | 2066  |
| SAL_CA1262AA | 40322 | SRR1968327 | 2014 | 8  |    | Europe | United Kingdom | Enteritidis | Enteritidis | 3888  | 29078 |
| SAL_CA1278AA | 57111 | SRR1968319 | 2014 | 8  | 1  | Europe | United Kingdom | Enteritidis | Enteritidis | 3888  | 29070 |
| SAL_CA1291AA | 50889 | SRR1968313 | 2014 | 9  |    | Europe | United Kingdom | Enteritidis | Enteritidis | 1425  | 29064 |
| SAL_CA1299AA | 40273 | SRR1968309 | 2014 | 8  | 12 | Europe | United Kingdom | Enteritidis | Enteritidis | 3888  | 29060 |
| SAL_CA1302AA | 12190 | SRR1968307 | 2014 | 5  |    | Europe | United Kingdom | Enteritidis | Enteritidis | 1425  | 29058 |
| SAL_CA1304AA | 27973 | SRR1968306 | 2014 | 7  | 17 | Europe | United Kingdom | Enteritidis | Enteritidis | 1425  | 29057 |
| SAL_CA1311AA | 9310  | SRR1968303 | 2014 | 4  | 23 | Europe | United Kingdom | Enteritidis | Enteritidis | 3888  | 29054 |
| SAL_CA1315AA | 45614 | SRR1968301 | 2014 | 9  |    | Europe | United Kingdom | Enteritidis | Enteritidis | 1425  | 29052 |
| SAL_CA1318AA | 25320 | SRR1968299 | 2014 | 6  | 24 | Europe | United Kingdom | Enteritidis | Enteritidis | 3888  | 29050 |
| SAL_CA1320AA | 9268  | SRR1968298 | 2014 | 4  |    | Europe | United Kingdom | Enteritidis | Enteritidis | 1425  | 29049 |
| SAL_CA1323AA | 13856 | SRR1968297 | 2014 | 5  |    | Europe | United Kingdom | Enteritidis | Enteritidis | 1425  | 29048 |
| SAL_CA1339AA | 73195 | SRR1968289 | 2014 | 12 |    | Europe | United Kingdom | Enteritidis | Enteritidis | 1425  | 29043 |
| SAL_CA1353AA | 72275 | SRR1968282 | 2014 | 12 |    | Europe | United Kingdom | Enteritidis | Enteritidis | 1425  | 25004 |
| SAL_CA1359AA | 90511 | SRR1968279 | 2015 | 2  |    | Europe | United Kingdom | Enteritidis | Enteritidis | 1425  | 29038 |
| SAL_CA1364AA | 55554 | SRR1968277 | 2014 | 9  |    | Europe | United Kingdom | Enteritidis | Enteritidis | 1425  | 29036 |
| SAL_CA1374AA | 50355 | SRR1968272 | 2014 | 9  |    | Europe | United Kingdom | Enteritidis | Enteritidis | 1425  | 29031 |
| SAL_CA1382AA | 40796 | SRR1968268 | 2014 | 8  |    | Europe | United Kingdom | Enteritidis | Enteritidis | 27796 | 29027 |
| SAL_CA1384AA | 50364 | SRR1968267 | 2014 | 9  |    | Europe | United Kingdom | Enteritidis | Enteritidis | 3897  | 29026 |
| SAL_CA1386AA | 53097 | SRR1968266 | 2014 | 9  |    | Europe | United Kingdom | Enteritidis | Enteritidis | 1425  | 7550  |
| SAL_CA1390AA | 99080 | SRR1968264 | 2015 | 3  |    | Europe | United Kingdom | Enteritidis | Enteritidis | 1425  | 29024 |
| SAL_CA1394AA | 37000 | SRR1968262 | 2014 | 7  |    | Europe | United Kingdom | Enteritidis | Enteritidis | 1425  | 29022 |
| SAL_CA1396AA | 91291 | SRR1968261 | 2015 | 2  |    | Europe | United Kingdom | Enteritidis | Enteritidis | 3888  | 29021 |
| SAL_CA1406AA | 91898 | SRR1968256 | 2014 | 11 |    | Europe | United Kingdom | Enteritidis | Enteritidis | 1425  | 29018 |
| SAL_CA1414AA | 12187 | SRR1968252 | 2014 | 5  |    | Europe | United Kingdom | Enteritidis | Enteritidis | 1425  | 29014 |
| SAL_CA1418AA | 65378 | SRR1968250 | 2014 | 10 |    | Europe | United Kingdom | Enteritidis | Enteritidis | 26142 | 29012 |
| SAL_CA1422AA | 27060 | SRR1968248 | 2014 | 7  |    | Europe | United Kingdom | Enteritidis | Enteritidis | 1425  | 29010 |
| SAL_CA1429AA | 75992 | SRR1968244 | 2014 | 12 |    | Europe | United Kingdom | Enteritidis | Enteritidis | 1425  | 29007 |
| SAL_CA1435AA | 25342 | SRR1968239 | 2014 | 7  |    | Europe | United Kingdom | Enteritidis | Enteritidis | 3888  | 29003 |
| SAL_CA1440AA | 83319 | SRR1968235 | 2015 | 1  |    | Europe | United Kingdom | Enteritidis | Enteritidis | 1425  | 28999 |
| SAL_CA1444AA | 51292 | SRR1968233 | 2014 | 9  |    | Europe | United Kingdom | Enteritidis | Enteritidis | 1425  | 28997 |
| SAL_CA1454AA | 80603 | SRR1968228 | 2015 | 1  |    | Europe | United Kingdom | Enteritidis | Enteritidis | 1425  | 7117  |
| SAL_CA1459AA | 63622 | SRR1968225 | 2014 | 9  |    | Europe | United Kingdom | Enteritidis | Enteritidis | 1425  | 28989 |
| SAL_CA1461AA | 56111 | SRR1968224 | 2014 | 9  |    | Europe | United Kingdom | Enteritidis | Enteritidis | 1425  | 28988 |
| SAL_CA1465AA | 9177  | SRR1968222 | 2014 | 5  |    | Europe | United Kingdom | Enteritidis | Enteritidis | 1425  | 28986 |
| SAL_CA1478AA | 31917 | SRR1968213 | 2014 | 7  | 18 | Europe | United Kingdom | Enteritidis | Enteritidis | 3888  | 28978 |
| SAL_CA1480AA | 31651 | SRR1968212 | 2014 | 7  | 15 | Europe | United Kingdom | Enteritidis | Enteritidis | 1425  | 28976 |
| SAL_CA1486AA | 55586 | SRR1968209 | 2014 | 9  |    | Europe | United Kingdom | Enteritidis | Enteritidis | 1425  | 28970 |
| SAL_CA1499AA | 38412 | SRR1968202 | 2014 | 8  | 6  | Europe | United Kingdom | Enteritidis | Enteritidis | 1425  | 28959 |
| SAL_CA1519AA | 68691 | SRR1968192 | 2014 | 11 |    | Europe | United Kingdom | Enteritidis | Enteritidis | 1425  | 28940 |

|              |       |            |      |    |           |                |             |             |       |       |
|--------------|-------|------------|------|----|-----------|----------------|-------------|-------------|-------|-------|
| SAL_CA1521AA | 63665 | SRR1968191 | 2014 | 10 | Europe    | United Kingdom | Enteritidis | Enteritidis | 1425  | 28938 |
| SAL_CA1535AA | 53100 | SRR1968184 | 2014 | 9  | Europe    | United Kingdom | Enteritidis | Enteritidis | 1425  | 28925 |
| SAL_CA1540AA | 68686 | SRR1968182 | 2014 | 11 | Europe    | United Kingdom | Enteritidis | Enteritidis | 1425  | 25914 |
| SAL_CA1543AA | 91232 | SRR1968180 | 2015 | 1  | Europe    | United Kingdom | Enteritidis | Enteritidis | 3888  | 28918 |
| SAL_CA1552AA | 53101 | SRR1968176 | 2014 | 9  | Europe    | United Kingdom | Enteritidis | Enteritidis | 3888  | 7867  |
| SAL_CA1558AA | 60171 | SRR1968173 | 2014 | 10 | Europe    | United Kingdom | Enteritidis | Enteritidis | 1425  | 28904 |
| SAL_CA1560AA | 23076 | SRR1968172 | 2014 | 6  | Europe    | United Kingdom | Enteritidis | Enteritidis | 1425  | 28902 |
| SAL_CA1562AA | 25189 | SRR1968171 | 2014 | 7  | Europe    | United Kingdom | Enteritidis | Enteritidis | 1425  | 28900 |
| SAL_CA1568AA | 9176  | SRR1968168 | 2014 | 5  | Europe    | United Kingdom | Enteritidis | Enteritidis | 1425  | 28894 |
| SAL_CA1575AA | 83341 | SRR1968164 | 2015 | 1  | Europe    | United Kingdom | Enteritidis | Enteritidis | 1425  | 28888 |
| SAL_CA1588AA | 65355 | SRR1968156 | 2014 | 10 | Europe    | United Kingdom | Enteritidis | Enteritidis | 1425  | 28875 |
| SAL_CA1594AA | 63775 | SRR1968152 | 2014 | 10 | Europe    | United Kingdom | Enteritidis | Enteritidis | 1425  | 28869 |
| SAL_CA1596AA | 62988 | SRR1968151 | 2014 | 9  | Europe    | United Kingdom | Enteritidis | Enteritidis | 1425  | 28868 |
| SAL_CA1602AA | 63730 | SRR1968147 | 2014 | 10 | Europe    | United Kingdom | Enteritidis | Enteritidis | 1425  | 28863 |
| SAL_CA1617AA | 50835 | SRR1968138 | 2014 | 9  | Europe    | United Kingdom | Enteritidis | Enteritidis | 3888  | 28851 |
| SAL_CA1621AA | 91217 | SRR1968136 | 2015 | 2  | Europe    | United Kingdom | Enteritidis | Enteritidis | 1425  | 28848 |
| SAL_CA1623AA | 99757 | SRR1968135 | 2015 | 3  | Europe    | United Kingdom | Enteritidis | Enteritidis | 1425  | 28846 |
| SAL_CA1625AA | 56156 | SRR1968134 | 2014 | 9  | Europe    | United Kingdom | Enteritidis | Enteritidis | 1425  | 28844 |
| SAL_CA1640AA | 23065 | SRR1968127 | 2014 | 6  | Europe    | United Kingdom | Enteritidis | Enteritidis | 1425  | 28829 |
| SAL_CA1644AA | 9263  | SRR1968125 | 2014 | 4  | 24 Europe | United Kingdom | Enteritidis | Enteritidis | 1425  | 28825 |
| SAL_CA1648AA | 29393 | SRR1968123 | 2014 | 7  | Europe    | United Kingdom | Enteritidis | Enteritidis | 1425  | 28821 |
| SAL_CA1654AA | 37827 | SRR1968120 | 2014 | 7  | 24 Europe | United Kingdom | Enteritidis | Enteritidis | 3888  | 28815 |
| SAL_CA1678AA | 40271 | SRR1968108 | 2014 | 8  | Europe    | United Kingdom | Enteritidis | Enteritidis | 1425  | 28792 |
| SAL_CA1680AA | 89105 | SRR1968107 | 2015 | 2  | Europe    | United Kingdom | Enteritidis | Enteritidis | 1425  | 6917  |
| SAL_CA1682AA | 26666 | SRR1968106 | 2014 | 7  | Europe    | United Kingdom | Enteritidis | Enteritidis | 1425  | 28789 |
| SAL_CA1709AA | 45579 | SRR1968089 | 2014 | 9  | 9 Europe  | United Kingdom | Enteritidis | Enteritidis | 1425  | 28762 |
| SAL_CA1715AA | 38326 | SRR1968083 | 2014 | 8  | Europe    | United Kingdom | Enteritidis | Enteritidis | 1425  | 28756 |
| SAL_CA1717AA | 61877 | SRR1968081 | 2014 | 10 | Europe    | United Kingdom | Enteritidis | Enteritidis | 1425  | 28754 |
| SAL_CA1719AA | 98249 | SRR1968079 | 2015 | 3  | Europe    | United Kingdom | Enteritidis | Enteritidis | 1425  | 24766 |
| SAL_CA1720AA | 72313 | SRR1968078 | 2014 | 12 | Europe    | United Kingdom | Enteritidis | Enteritidis | 1425  | 28752 |
| SAL_CA1723AA | 46016 | SRR1968075 | 2014 | 8  | Europe    | United Kingdom | Enteritidis | Enteritidis | 1425  | 28750 |
| SAL_CA1727AA | 14539 | SRR1968073 | 2014 | 5  | Europe    | United Kingdom | Enteritidis | Enteritidis | 26495 | 28748 |
| SAL_CA1733AA | 14536 | SRR1968070 | 2014 | 5  | Europe    | United Kingdom | Enteritidis | Enteritidis | 1425  | 28745 |
| SAL_CA1735AA | 65373 | SRR1968069 | 2014 | 10 | 2 Europe  | United Kingdom | Enteritidis | Enteritidis | 3888  | 28744 |
| SAL_CA1737AA | 23449 | SRR1968068 | 2014 | 5  | Europe    | United Kingdom | Enteritidis | Enteritidis | -1662 | 28743 |
| SAL_CA1741AA | 89897 | SRR1968066 | 2015 | 2  | Europe    | United Kingdom | Enteritidis | Enteritidis | 1425  | 28741 |
| SAL_CA1743AA | 41999 | SRR1968065 | 2014 | 8  | Europe    | United Kingdom | Enteritidis | Enteritidis | 1425  | 28740 |
| SAL_CA1747AA | 42171 | SRR1968063 | 2014 | 8  | 26 Europe | United Kingdom | Enteritidis | Enteritidis | 3888  | 28739 |
| SAL_CA1753AA | 90509 | SRR1968060 | 2015 | 2  | Europe    | United Kingdom | Enteritidis | Enteritidis | 1425  | 28737 |
| SAL_CA1755AA | 21789 | SRR1968059 | 2014 | 6  | Europe    | United Kingdom | Enteritidis | Enteritidis | 3888  | 28736 |
| SAL_CA1763AA | 37114 | SRR1968055 | 2014 | 8  | Europe    | United Kingdom | Enteritidis | Enteritidis | 1425  | 28733 |
| SAL_CA1765AA | 95022 | SRR1968054 | 2015 | 3  | Europe    | United Kingdom | Enteritidis | Enteritidis | 3897  | 28732 |
| SAL_CA1771AA | 38417 | SRR1968051 | 2014 | 7  | 28 Europe | United Kingdom | Enteritidis | Enteritidis | 3888  | 28729 |
| SAL_CA1776AA | 34170 | SRR1968048 | 2014 | 7  | Europe    | United Kingdom | Enteritidis | Enteritidis | 26493 | 28726 |
| SAL_CA1781AA | 95017 | SRR1968045 | 2015 | 3  | 11 Europe | United Kingdom | Enteritidis | Enteritidis | 1425  | 28723 |
| SAL_CA1784AA | 37810 | SRR1968043 | 2014 | 7  | 29 Europe | United Kingdom | Enteritidis | Enteritidis | 3888  | 28721 |
| SAL_CA1794AA | 41942 | SRR1968038 | 2014 | 8  | Europe    | United Kingdom | Enteritidis | Enteritidis | 1425  | 28716 |
| SAL_CA1797AA | 12130 | SRR1968037 | 2014 | 5  | Europe    | United Kingdom | Enteritidis | Enteritidis | 3888  | 28715 |
| SAL_CA1801AA | 38416 | SRR1968035 | 2014 | 8  | Europe    | United Kingdom | Enteritidis | Enteritidis | 1425  | 28713 |
| SAL_CA1820AA | 13387 | SRR1968024 | 2014 | 5  | Europe    | United Kingdom | Enteritidis | Enteritidis | 1425  | 28704 |
| SAL_CA1838AA | 12150 | SRR1968015 | 2014 | 5  | Europe    | United Kingdom | Enteritidis | Enteritidis | 1425  | 28696 |
| SAL_CA1862AA | 99058 | SRR1968003 | 2015 | 3  | Europe    | United Kingdom | Enteritidis | Enteritidis | 1425  | 28688 |
| SAL_CA1864AA | 42001 | SRR1968002 | 2014 | 8  | Europe    | United Kingdom | Enteritidis | Enteritidis | 1425  | 28687 |
| SAL_CA1866AA | 53106 | SRR1968001 | 2014 | 9  | Europe    | United Kingdom | Enteritidis | Enteritidis | 1425  | 28686 |
| SAL_CA1871AA | 37006 | SRR1967999 | 2014 | 8  | 3 Europe  | United Kingdom | Enteritidis | Enteritidis | 3888  | 28684 |
| SAL_CA1873AA | 63580 | SRR1967998 | 2014 | 9  | Europe    | United Kingdom | Enteritidis | Enteritidis | 3888  | 28683 |
| SAL_CA1874AA | 91294 | SRR1967997 | 2015 | 2  | Europe    | United Kingdom | Enteritidis | Enteritidis | 1425  | 28682 |
| SAL_CA1876AA | 26652 | SRR1967996 | 2014 | 7  | Europe    | United Kingdom | Enteritidis | Enteritidis | 1425  | 28681 |
| SAL_CA1882AA | 36394 | SRR1967993 | 2014 | 8  | 4 Europe  | United Kingdom | Enteritidis | Enteritidis | 3888  | 2066  |

|              |       |            |      |    |    |        |                |             |             |       |       |
|--------------|-------|------------|------|----|----|--------|----------------|-------------|-------------|-------|-------|
| SAL_CA1887AA | 39447 | SRR1967990 | 2014 | 7  | 18 | Europe | United Kingdom | Enteritidis | Enteritidis | 3888  | 28676 |
| SAL_CA1889AA | 32466 | SRR1967989 | 2014 | 7  | 18 | Europe | United Kingdom | Enteritidis | Enteritidis | 3888  | 28675 |
| SAL_CA1892AA | 65123 | SRR1967987 | 2014 | 11 |    | Europe | United Kingdom | Enteritidis | Enteritidis | 3888  | 25814 |
| SAL_CA1895AA | 53005 | SRR1967985 | 2014 | 10 |    | Europe | United Kingdom | Enteritidis | Enteritidis | 1425  | 28673 |
| SAL_CA1908AA | 75965 | SRR1967979 | 2014 | 12 |    | Europe | United Kingdom | Enteritidis | Enteritidis | 1425  | 28667 |
| SAL_CA1913AA | 36384 | SRR1967976 | 2014 | 8  |    | Europe | United Kingdom | Enteritidis | Enteritidis | 1425  | 28664 |
| SAL_CA1918AA | 96230 | SRR1967974 | 2015 | 3  |    | Europe | United Kingdom | Enteritidis | Enteritidis | 1425  | 28662 |
| SAL_CA1919AA | 65407 | SRR1967973 | 2014 | 9  | 17 | Europe | United Kingdom | Enteritidis | Enteritidis | 1425  | 28661 |
| SAL_CA1925AA | 89901 | SRR1967970 | 2015 | 2  |    | Europe | United Kingdom | Enteritidis | Enteritidis | 1425  | 27831 |
| SAL_CA1946AA | 96240 | SRR1967960 | 2015 | 3  |    | Europe | United Kingdom | Enteritidis | Enteritidis | 1425  | 28651 |
| SAL_CA1948AA | 90476 | SRR1967959 | 2015 | 2  |    | Europe | United Kingdom | Enteritidis | Enteritidis | 1425  | 28650 |
| SAL_CA1951AA | 37105 | SRR1967958 | 2014 | 8  |    | Europe | United Kingdom | Enteritidis | Enteritidis | 1425  | 28649 |
| SAL_CA1953AA | 63720 | SRR1967957 | 2014 | 10 |    | Europe | United Kingdom | Enteritidis | Enteritidis | 1425  | 28648 |
| SAL_CA1955AA | 40298 | SRR1967956 | 2014 | 8  |    | Europe | United Kingdom | Enteritidis | Enteritidis | 1425  | 28647 |
| SAL_CA1957AA | 14898 | SRR1967955 | 2014 | 5  |    | Europe | United Kingdom | Enteritidis | Enteritidis | 1425  | 28646 |
| SAL_CA1965AA | 25219 | SRR1967951 | 2014 | 7  |    | Europe | United Kingdom | Enteritidis | Enteritidis | 1425  | 28643 |
| SAL_CA1976AA | 43426 | SRR1967945 | 2014 | 9  |    | Europe | United Kingdom | Enteritidis | Enteritidis | 3888  | 28637 |
| SAL_CA1984AA | 63045 | SRR1967941 | 2014 | 10 |    | Europe | United Kingdom | Enteritidis | Enteritidis | 26481 | 28633 |
| SAL_CA1997AA | 63685 | SRR1967934 | 2014 | 10 |    | Europe | United Kingdom | Enteritidis | Enteritidis | 1425  | 28627 |
| SAL_CA2004AA | 80556 | SRR1967931 | 2015 | 1  |    | Europe | United Kingdom | Enteritidis | Enteritidis | 1425  | 28624 |
| SAL_CA2010AA | 56153 | SRR1967928 | 2014 | 9  |    | Europe | United Kingdom | Enteritidis | Enteritidis | 3888  | 25428 |
| SAL_CA2018AA | 90472 | SRR1967924 | 2015 | 2  |    | Europe | United Kingdom | Enteritidis | Enteritidis | 1425  | 27622 |
| SAL_CA2024AA | 25003 | SRR1967921 | 2014 | 7  |    | Europe | United Kingdom | Enteritidis | Enteritidis | 1425  | 28620 |
| SAL_CA2037AA | 23509 | SRR1967914 | 2014 | 6  |    | Europe | United Kingdom | Enteritidis | Enteritidis | 1425  | 28613 |
| SAL_CA2039AA | 43430 | SRR1967913 | 2014 | 9  |    | Europe | United Kingdom | Enteritidis | Enteritidis | 1425  | 28612 |
| SAL_CA2045AA | 31919 | SRR1967910 | 2014 | 7  |    | Europe | United Kingdom | Enteritidis | Enteritidis | 1425  | 28609 |
| SAL_CA2050AA | 14126 | SRR1967907 | 2014 | 5  |    | Europe | United Kingdom | Enteritidis | Enteritidis | 1425  | 28606 |
| SAL_CA2052AA | 37821 | SRR1967906 | 2014 | 8  |    | Europe | United Kingdom | Enteritidis | Enteritidis | 1425  | 28605 |
| SAL_CA2055AA | 14883 | SRR1967905 | 2014 | 5  |    | Europe | United Kingdom | Enteritidis | Enteritidis | 26483 | 28604 |
| SAL_CA2059AA | 38393 | SRR1967903 | 2014 | 8  |    | Europe | United Kingdom | Enteritidis | Enteritidis | 1425  | 28602 |
| SAL_CA2060AA | 91962 | SRR1967902 | 2015 | 2  |    | Europe | United Kingdom | Enteritidis | Enteritidis | 1425  | 28601 |
| SAL_CA2066AA | 39448 | SRR1967899 | 2014 | 7  |    | Europe | United Kingdom | Enteritidis | Enteritidis | 1425  | 28598 |
| SAL_CA2072AA | 63625 | SRR1967895 | 2014 | 9  |    | Europe | United Kingdom | Enteritidis | Enteritidis | 1425  | 28595 |
| SAL_CA2077AA | 50851 | SRR1967892 | 2014 | 9  |    | Europe | United Kingdom | Enteritidis | Enteritidis | 1425  | 28591 |
| SAL_CA2084AA | 38332 | SRR1967887 | 2014 | 7  | 25 | Europe | United Kingdom | Enteritidis | Enteritidis | 3888  | 2066  |
| SAL_CA2093AA | 63040 | SRR1967878 | 2014 | 10 |    | Europe | United Kingdom | Enteritidis | Enteritidis | 8469  | 28576 |
| SAL_CA2094AA | 96964 | SRR1967877 | 2015 | 3  |    | Europe | United Kingdom | Enteritidis | Enteritidis | 1425  | 28575 |
| SAL_CA2109AA | 25275 | SRR1967862 | 2014 | 7  |    | Europe | United Kingdom | Enteritidis | Enteritidis | 1425  | 28563 |
| SAL_CA2113AA | 31968 | SRR1967858 | 2014 | 7  | 26 | Europe | United Kingdom | Enteritidis | Enteritidis | 3888  | 28559 |
| SAL_CA2121AA | 5919  | SRR1967850 | 2014 | 4  |    | Europe | United Kingdom | Enteritidis | Enteritidis | 1425  | 28551 |
| SAL_CA2132AA | 65046 | SRR1967839 | 2014 | 11 |    | Europe | United Kingdom | Enteritidis | Enteritidis | 3888  | 28540 |
| SAL_CA2133AA | 38769 | SRR1967838 | 2014 | 8  |    | Europe | United Kingdom | Enteritidis | Enteritidis | 1425  | 28539 |
| SAL_CA2134AA | 34169 | SRR1967837 | 2014 | 7  |    | Europe | United Kingdom | Enteritidis | Enteritidis | 1425  | 28538 |
| SAL_CA2138AA | 89902 | SRR1967833 | 2015 | 2  |    | Europe | United Kingdom | Enteritidis | Enteritidis | 1425  | 28535 |
| SAL_CA2140AA | 96229 | SRR1967831 | 2015 | 3  |    | Europe | United Kingdom | Enteritidis | Enteritidis | 1425  | 28533 |
| SAL_CA2141AA | 68684 | SRR1967830 | 2014 | 11 |    | Europe | United Kingdom | Enteritidis | Enteritidis | 1425  | 28532 |
| SAL_CA2146AA | 46015 | SRR1967825 | 2014 | 8  |    | Europe | United Kingdom | Enteritidis | Enteritidis | 1425  | 28528 |
| SAL_CA2150AA | 9183  | SRR1967821 | 2014 | 5  |    | Europe | United Kingdom | Enteritidis | Enteritidis | 1425  | 28525 |
| SAL_CA2151AA | 45608 | SRR1967820 | 2014 | 9  |    | Europe | United Kingdom | Enteritidis | Enteritidis | 1425  | 28524 |
| SAL_CA2157AA | 67567 | SRR1967814 | 2014 | 11 |    | Europe | United Kingdom | Enteritidis | Enteritidis | 1425  | 25914 |
| SAL_CA2160AA | 94100 | SRR1967811 | 2015 | 3  |    | Europe | United Kingdom | Enteritidis | Enteritidis | 3888  | 28518 |
| SAL_CA2162AA | 57108 | SRR1967809 | 2014 | 8  |    | Europe | United Kingdom | Enteritidis | Enteritidis | 1425  | 28516 |
| SAL_CA2165AA | 40230 | SRR1967806 | 2014 | 8  |    | Europe | United Kingdom | Enteritidis | Enteritidis | 1425  | 28513 |
| SAL_CA2167AA | 40263 | SRR1967804 | 2014 | 8  |    | Europe | United Kingdom | Enteritidis | Enteritidis | 1425  | 28512 |
| SAL_CA2169AA | 75957 | SRR1967802 | 2014 | 12 |    | Europe | United Kingdom | Enteritidis | Enteritidis | 1425  | 28510 |
| SAL_CA2170AA | 50360 | SRR1967801 | 2014 | 9  | 3  | Europe | United Kingdom | Enteritidis | Enteritidis | 3888  | 28509 |
| SAL_CA2171AA | 39444 | SRR1967800 | 2014 | 7  |    | Europe | United Kingdom | Enteritidis | Enteritidis | 1425  | 28508 |
| SAL_CA2175AA | 21767 | SRR1967796 | 2014 | 6  | 4  | Europe | United Kingdom | Enteritidis | Enteritidis | 3888  | 28504 |
| SAL_CA2178AA | 98287 | SRR1967793 | 2015 | 3  |    | Europe | United Kingdom | Enteritidis | Enteritidis | 3888  | 28502 |

|              |       |            |      |    |    |        |                |                         |             |       |       |
|--------------|-------|------------|------|----|----|--------|----------------|-------------------------|-------------|-------|-------|
| SAL_CA2184AA | 31974 | SRR1967787 | 2014 | 7  | 25 | Europe | United Kingdom | Enteritidis             | Enteritidis | 3888  | 28497 |
| SAL_CA2190AA | 7410  | SRR1967781 | 2014 | 4  | 29 | Europe | United Kingdom | Enteritidis             | Enteritidis | 1425  | 28492 |
| SAL_CA2191AA | 24038 | SRR1967780 | 2014 | 6  | 23 | Europe | United Kingdom | Enteritidis             | Enteritidis | 3888  | 28491 |
| SAL_CA2199AA | 36531 | SRR1967772 | 2014 | 7  | 29 | Europe | United Kingdom | Enteritidis             | Enteritidis | 3888  | 28483 |
| SAL_CA2200AA | 36526 | SRR1967771 | 2014 | 7  | 28 | Europe | United Kingdom | Enteritidis             | Enteritidis | 3888  | 2066  |
| SAL_CA2203AA | 29387 | SRR1967768 | 2014 | 7  |    | Europe | United Kingdom | Enteritidis             | Enteritidis | 1425  | 28480 |
| SAL_CA2205AA | 38371 | SRR1967766 | 2014 | 7  | 28 | Europe | United Kingdom | Enteritidis             | Enteritidis | 3888  | 28478 |
| SAL_CA2208AA | 14899 | SRR1967763 | 2014 | 5  |    | Europe | United Kingdom | Enteritidis             | Enteritidis | 3888  | 28475 |
| SAL_CA2209AA | 57118 | SRR1967762 | 2014 | 10 |    | Europe | United Kingdom | Enteritidis             | Enteritidis | 3888  | 28474 |
| SAL_CA2213AA | 5934  | SRR1967758 | 2014 | 4  |    | Europe | United Kingdom | Enteritidis             | Enteritidis | 1425  | 28471 |
| SAL_CA2214AA | 9309  | SRR1967757 | 2014 | 5  |    | Europe | United Kingdom | Enteritidis             | Enteritidis | 3888  | 28470 |
| SAL_CA2217AA | 12192 | SRR1967754 | 2014 | 5  |    | Europe | United Kingdom | Enteritidis             | Enteritidis | 1425  | 28467 |
| SAL_CA2221AA | 43429 | SRR1967750 | 2014 | 9  |    | Europe | United Kingdom | Enteritidis             | Enteritidis | 1425  | 28464 |
| SAL_CA2224AA | 9181  | SRR1967747 | 2014 | 5  |    | Europe | United Kingdom | Enteritidis             | Enteritidis | 3888  | 28461 |
| SAL_CA2231AA | 63044 | SRR1967740 | 2014 | 10 |    | Europe | United Kingdom | Enteritidis             | Enteritidis | 1425  | 27354 |
| SAL_CA2242AA | 32464 | SRR1967729 | 2014 | 7  | 17 | Europe | United Kingdom | Enteritidis             | Enteritidis | 3888  | 28445 |
| SAL_CA2246AA | 53009 | SRR1967725 | 2014 | 8  |    | Europe | United Kingdom | Enteritidis (Predicted) | Enteritidis | 1425  | 28441 |
| SAL_CA2252AA | 22253 | SRR1967719 | 2014 | 6  |    | Europe | United Kingdom | Enteritidis             | Enteritidis | 1425  | 28435 |
| SAL_CA2255AA | 38424 | SRR1967716 | 2014 | 8  |    | Europe | United Kingdom | Enteritidis             | Enteritidis | 3888  | 28432 |
| SAL_CA2265AA | 36523 | SRR1967706 | 2014 | 8  |    | Europe | United Kingdom | Enteritidis             | Enteritidis | 1425  | 28422 |
| SAL_CA2273AA | 56154 | SRR1967698 | 2014 | 9  |    | Europe | United Kingdom | Enteritidis             | Enteritidis | 3888  | 28415 |
| SAL_CA2280AA | 63678 | SRR1967691 | 2014 | 10 |    | Europe | United Kingdom | Enteritidis             | Enteritidis | 1425  | 24547 |
| SAL_CA2284AA | 5375  | SRR1967687 | 2014 | 4  |    | Europe | United Kingdom | Enteritidis             | Enteritidis | 1425  | 28406 |
| SAL_CA2289AA | 90477 | SRR1967682 | 2015 | 2  |    | Europe | United Kingdom | Enteritidis             | Enteritidis | 3888  | 28401 |
| SAL_CA2290AA | 63621 | SRR1967681 | 2014 | 10 |    | Europe | United Kingdom | Enteritidis             | Enteritidis | 26481 | 28400 |
| SAL_CA2298AA | 63779 | SRR1967673 | 2014 | 10 |    | Europe | United Kingdom | Enteritidis             | Enteritidis | 1425  | 28394 |
| SAL_CA2313AA | 43428 | SRR1967658 | 2014 | 9  |    | Europe | United Kingdom | Enteritidis             | Enteritidis | 26434 | 28383 |
| SAL_CA2315AA | 23443 | SRR1967656 | 2014 | 4  |    | Europe | United Kingdom | Enteritidis             | Enteritidis | 1425  | 28381 |
| SAL_CA2319AA | 25218 | SRR1967652 | 2014 | 7  |    | Europe | United Kingdom | Enteritidis             | Enteritidis | 3888  | 28377 |
| SAL_CA2323AA | 25233 | SRR1967648 | 2014 | 7  |    | Europe | United Kingdom | Enteritidis             | Enteritidis | 3888  | 28373 |
| SAL_CA2324AA | 13366 | SRR1967647 | 2014 | 4  |    | Europe | United Kingdom | Enteritidis             | Enteritidis | 1425  | 28372 |
| SAL_CA2325AA | 39509 | SRR1967646 | 2014 | 8  |    | Europe | United Kingdom | Enteritidis             | Enteritidis | 28500 | 28371 |
| SAL_CA2338AA | 53116 | SRR1967633 | 2014 | 9  |    | Europe | United Kingdom | Enteritidis             | Enteritidis | 1425  | 28361 |
| SAL_CA2339AA | 36363 | SRR1967632 | 2014 | 8  |    | Europe | United Kingdom | Enteritidis             | Enteritidis | 1425  | 28360 |
| SAL_CA2342AA | 51284 | SRR1967629 | 2014 | 9  |    | Europe | United Kingdom | Enteritidis             | Enteritidis | 1425  | 27094 |
| SAL_CA2343AA | 91267 | SRR1967628 | 2015 | 2  |    | Europe | United Kingdom | Enteritidis (Predicted) | Enteritidis | 1425  | 28357 |
| SAL_CA2346AA | 36385 | SRR1967625 | 2014 | 8  | 4  | Europe | United Kingdom | Enteritidis             | Enteritidis | 3888  | 7317  |
| SAL_CA2362AA | 36464 | SRR1967609 | 2014 | 7  | 25 | Europe | United Kingdom | Enteritidis             | Enteritidis | 3888  | 2066  |
| SAL_CA2364AA | 56138 | SRR1967607 | 2014 | 9  |    | Europe | United Kingdom | Enteritidis             | Enteritidis | 3888  | 28341 |
| SAL_CA2371AA | 46589 | SRR1967600 | 2014 | 7  | 17 | Europe | United Kingdom | Enteritidis             | Enteritidis | 3888  | 28335 |
| SAL_CA2372AA | 13811 | SRR1967599 | 2014 | 5  |    | Europe | United Kingdom | Enteritidis             | Enteritidis | 1425  | 28334 |
| SAL_CA2374AA | 57130 | SRR1967597 | 2014 | 9  | 30 | Europe | United Kingdom | Enteritidis             | Enteritidis | 3888  | 28332 |
| SAL_CA2378AA | 38333 | SRR1967593 | 2014 | 8  |    | Europe | United Kingdom | Enteritidis (Predicted) | Enteritidis | 3888  | 28328 |
| SAL_CA2379AA | 51268 | SRR1967592 | 2014 | 9  |    | Europe | United Kingdom | Enteritidis             | Enteritidis | 3888  | 7810  |
| SAL_CA2381AA | 14922 | SRR1967590 | 2014 | 5  |    | Europe | United Kingdom | Enteritidis             | Enteritidis | 3888  | 7105  |
| SAL_CA2383AA | 73222 | SRR1967588 | 2014 | 12 |    | Europe | United Kingdom | Enteritidis             | Enteritidis | 1425  | 26699 |
| SAL_CA2390AA | 84427 | SRR1967581 | 2015 | 1  |    | Europe | United Kingdom | Enteritidis             | Enteritidis | 1425  | 28321 |
| SAL_CA2392AA | 40321 | SRR1967579 | 2014 | 8  |    | Europe | United Kingdom | Enteritidis             | Enteritidis | 1425  | 28319 |
| SAL_CA2395AA | 38780 | SRR1967576 | 2014 | 8  |    | Europe | United Kingdom | Enteritidis             | Enteritidis | 1425  | 28316 |
| SAL_CA2397AA | 36503 | SRR1967574 | 2014 | 7  |    | Europe | United Kingdom | Enteritidis             | Enteritidis | 1425  | 28314 |
| SAL_CA2399AA | 38337 | SRR1967572 | 2014 | 8  |    | Europe | United Kingdom | Enteritidis             | Enteritidis | 1425  | 28312 |
| SAL_CA2403AA | 65452 | SRR1967568 | 2014 | 10 |    | Europe | United Kingdom | Enteritidis             | Enteritidis | 1425  | 28308 |
| SAL_CA2409AA | 86837 | SRR1967562 | 2015 | 2  |    | Europe | United Kingdom | Enteritidis             | Enteritidis | 1425  | 28302 |
| SAL_CA2411AA | 83682 | SRR1967560 | 2014 | 10 |    | Europe | United Kingdom | Typhi                   | Enteritidis | 28454 | 26842 |
| SAL_CA2412AA | 98250 | SRR1967559 | 2015 | 3  |    | Europe | United Kingdom | Enteritidis             | Enteritidis | 1425  | 28300 |
| SAL_CA2419AA | 7394  | SRR1967552 | 2014 | 4  |    | Europe | United Kingdom | Enteritidis             | Enteritidis | 1425  | 28293 |
| SAL_CA2421AA | 13371 | SRR1967550 | 2014 | 4  |    | Europe | United Kingdom | Enteritidis             | Enteritidis | 3897  | 28291 |
| SAL_CA2422AA | 25269 | SRR1967549 | 2014 | 7  |    | Europe | United Kingdom | Enteritidis             | Enteritidis | 1425  | 28290 |
| SAL_CA2423AA | 31923 | SRR1967548 | 2014 | 7  | 23 | Europe | United Kingdom | Enteritidis             | Enteritidis | 3888  | 28289 |

|              |       |            |      |    |           |                |                         |             |       |       |
|--------------|-------|------------|------|----|-----------|----------------|-------------------------|-------------|-------|-------|
| SAL_CA2427AA | 25171 | SRR1967544 | 2014 | 7  | Europe    | United Kingdom | Enteritidis             | Enteritidis | 1425  | 28286 |
| SAL_CA2428AA | 69939 | SRR1967543 | 2014 | 11 | Europe    | United Kingdom | Enteritidis             | Enteritidis | 3888  | 25602 |
| SAL_CA2430AA | 24036 | SRR1967541 | 2014 | 6  | Europe    | United Kingdom | Enteritidis             | Enteritidis | 1425  | 28284 |
| SAL_CA2431AA | 24987 | SRR1967540 | 2014 | 6  | 28 Europe | United Kingdom | Enteritidis             | Enteritidis | 3888  | 28283 |
| SAL_CA2432AA | 14119 | SRR1967539 | 2014 | 5  | Europe    | United Kingdom | Enteritidis             | Enteritidis | 3888  | 28282 |
| SAL_CA2438AA | 32375 | SRR1967533 | 2014 | 7  | 18 Europe | United Kingdom | Enteritidis             | Enteritidis | 3888  | 7153  |
| SAL_CA2441AA | 50838 | SRR1967530 | 2014 | 9  | Europe    | United Kingdom | Enteritidis             | Enteritidis | 1425  | 28274 |
| SAL_CA2445AA | 9182  | SRR1967526 | 2014 | 5  | 7 Europe  | United Kingdom | Enteritidis             | Enteritidis | 1425  | 28270 |
| SAL_CA2449AA | 57122 | SRR1967522 | 2014 | 10 | Europe    | United Kingdom | Enteritidis             | Enteritidis | 1425  | 28266 |
| SAL_CA2455AA | 37010 | SRR1967516 | 2014 | 8  | Europe    | United Kingdom | Enteritidis             | Enteritidis | 1425  | 28260 |
| SAL_CA2458AA | 63590 | SRR1967513 | 2014 | 9  | Europe    | United Kingdom | Enteritidis             | Enteritidis | 1425  | 28257 |
| SAL_CA2461AA | 38718 | SRR1967510 | 2014 | 8  | 7 Europe  | United Kingdom | Enteritidis             | Enteritidis | 3888  | 28254 |
| SAL_CA2463AA | 63706 | SRR1967508 | 2014 | 10 | Europe    | United Kingdom | Enteritidis             | Enteritidis | 1425  | 7712  |
| SAL_CA2465AA | 25323 | SRR1967506 | 2014 | 7  | Europe    | United Kingdom | Enteritidis             | Enteritidis | 3888  | 28251 |
| SAL_CA2473AA | 97866 | SRR1967498 | 2015 | 3  | Europe    | United Kingdom | Enteritidis             | Enteritidis | 1425  | 27114 |
| SAL_CA2474AA | 38784 | SRR1967497 | 2014 | 8  | Europe    | United Kingdom | Enteritidis             | Enteritidis | 1425  | 28243 |
| SAL_CA2489AA | 7425  | SRR1967482 | 2014 | 4  | Europe    | United Kingdom | Enteritidis             | Enteritidis | 1425  | 28232 |
| SAL_CA2492AA | 37809 | SRR1967479 | 2014 | 7  | 29 Europe | United Kingdom | Enteritidis             | Enteritidis | 3888  | 7612  |
| SAL_CA2493AA | 36476 | SRR1967478 | 2014 | 7  | 21 Europe | United Kingdom | Enteritidis             | Enteritidis | 3888  | 7612  |
| SAL_CA2498AA | 27065 | SRR1967473 | 2014 | 7  | Europe    | United Kingdom | Enteritidis             | Enteritidis | 1425  | 28225 |
| SAL_CA2504AA | 40323 | SRR1967467 | 2014 | 8  | Europe    | United Kingdom | Enteritidis             | Enteritidis | 1425  | 28220 |
| SAL_CA2505AA | 38312 | SRR1967466 | 2014 | 8  | Europe    | United Kingdom | Enteritidis             | Enteritidis | 3888  | 28218 |
| SAL_CA2507AA | 50842 | SRR1967464 | 2014 | 9  | Europe    | United Kingdom | Enteritidis             | Enteritidis | 1425  | 28216 |
| SAL_CA2509AA | 32463 | SRR1967462 | 2014 | 7  | 17 Europe | United Kingdom | Enteritidis             | Enteritidis | 3888  | 28214 |
| SAL_CA2513AA | 13396 | SRR1967458 | 2014 | 5  | Europe    | United Kingdom | Enteritidis             | Enteritidis | 1425  | 28210 |
| SAL_CA2515AA | 38768 | SRR1967456 | 2014 | 8  | Europe    | United Kingdom | Enteritidis             | Enteritidis | 1425  | 28208 |
| SAL_CA2516AA | 42003 | SRR1967455 | 2014 | 8  | Europe    | United Kingdom | Enteritidis             | Enteritidis | 1425  | 28207 |
| SAL_CA2521AA | 69273 | SRR1967450 | 2014 | 11 | Europe    | United Kingdom | Enteritidis (Predicted) | Enteritidis | 1425  | 28202 |
| SAL_CA2522AA | 63725 | SRR1967449 | 2014 | 10 | Europe    | United Kingdom | Enteritidis             | Enteritidis | 3888  | 28201 |
| SAL_CA2538AA | 98247 | SRR1967433 | 2015 | 3  | Europe    | United Kingdom | Enteritidis             | Enteritidis | 1425  | 28191 |
| SAL_CA2539AA | 38343 | SRR1967432 | 2014 | 8  | Europe    | United Kingdom | Enteritidis             | Enteritidis | 26493 | 28190 |
| SAL_CA2546AA | 22255 | SRR1967425 | 2014 | 6  | Europe    | United Kingdom | Enteritidis             | Enteritidis | 1425  | 28185 |
| SAL_CA2549AA | 14099 | SRR1967422 | 2014 | 5  | 21 Europe | United Kingdom | Enteritidis             | Enteritidis | 3888  | 28182 |
| SAL_CA2555AA | 65017 | SRR1967416 | 2014 | 11 | Europe    | United Kingdom | Enteritidis             | Enteritidis | 1425  | 24707 |
| SAL_CA2557AA | 69917 | SRR1967414 | 2014 | 11 | Europe    | United Kingdom | Enteritidis             | Enteritidis | 1425  | 7784  |
| SAL_CA2561AA | 31935 | SRR1967410 | 2014 | 7  | Europe    | United Kingdom | Enteritidis             | Enteritidis | 1425  | 28172 |
| SAL_CA2564AA | 13357 | SRR1967407 | 2014 | 4  | Europe    | United Kingdom | Enteritidis             | Enteritidis | 1425  | 28170 |
| SAL_CA2567AA | 36499 | SRR1967404 | 2014 | 7  | Europe    | United Kingdom | Enteritidis             | Enteritidis | 3888  | 28167 |
| SAL_CA2568AA | 6432  | SRR1967403 | 2014 | 4  | Europe    | United Kingdom | Enteritidis             | Enteritidis | 1425  | 28166 |
| SAL_CA2570AA | 3785  | SRR1967401 | 2014 | 4  | Europe    | United Kingdom | Enteritidis             | Enteritidis | 1425  | 28164 |
| SAL_CA2572AA | 5353  | SRR1967399 | 2014 | 4  | Europe    | United Kingdom | Enteritidis             | Enteritidis | 1425  | 28162 |
| SAL_CA2575AA | 53011 | SRR1967396 | 2014 | 10 | Europe    | United Kingdom | Enteritidis             | Enteritidis | 3888  | 28159 |
| SAL_CA2577AA | 57103 | SRR1967394 | 2014 | 7  | 31 Europe | United Kingdom | Enteritidis             | Enteritidis | 3888  | 28157 |
| SAL_CA2580AA | 52959 | SRR1967391 | 2014 | 10 | Europe    | United Kingdom | Enteritidis             | Enteritidis | 1425  | 28154 |
| SAL_CA2588AA | 34184 | SRR1967383 | 2014 | 7  | 22 Europe | United Kingdom | Enteritidis             | Enteritidis | 3888  | 28146 |
| SAL_CA2591AA | 63915 | SRR1967380 | 2014 | 11 | Europe    | United Kingdom | Enteritidis             | Enteritidis | 1425  | 28143 |
| SAL_CA2593AA | 38317 | SRR1967378 | 2014 | 7  | 28 Europe | United Kingdom | Enteritidis             | Enteritidis | 3888  | 28141 |
| SAL_CA2596AA | 12133 | SRR1967375 | 2014 | 5  | Europe    | United Kingdom | Enteritidis             | Enteritidis | 1425  | 28138 |
| SAL_CA2604AA | 63781 | SRR1967367 | 2014 | 10 | Europe    | United Kingdom | Enteritidis             | Enteritidis | 1425  | 25504 |
| SAL_CA2615AA | 91296 | SRR1967356 | 2015 | 2  | Europe    | United Kingdom | Enteritidis             | Enteritidis | 1425  | 7210  |
| SAL_CA2617AA | 61881 | SRR1967354 | 2014 | 10 | Europe    | United Kingdom | Enteritidis             | Enteritidis | 1425  | 28121 |
| SAL_CA2619AA | 25346 | SRR1967352 | 2014 | 7  | Europe    | United Kingdom | Enteritidis             | Enteritidis | 3888  | 28119 |
| SAL_CA2624AA | 57156 | SRR1967347 | 2014 | 10 | Europe    | United Kingdom | Enteritidis             | Enteritidis | 1425  | 28115 |
| SAL_CA2631AA | 50353 | SRR1967340 | 2014 | 9  | Europe    | United Kingdom | Enteritidis             | Enteritidis | 1425  | 28109 |
| SAL_CA2636AA | 14895 | SRR1967335 | 2014 | 5  | 21 Europe | United Kingdom | Enteritidis             | Enteritidis | 1425  | 28104 |
| SAL_CA2637AA | 23442 | SRR1967334 | 2014 | 4  | Europe    | United Kingdom | Enteritidis             | Enteritidis | 1425  | 28103 |
| SAL_CA2640AA | 37803 | SRR1967331 | 2014 | 8  | Europe    | United Kingdom | Enteritidis             | Enteritidis | 3888  | 28100 |
| SAL_CA2642AA | 65450 | SRR1967329 | 2014 | 10 | Europe    | United Kingdom | Enteritidis             | Enteritidis | 1425  | 28098 |
| SAL_CA2650AA | 40324 | SRR1967321 | 2014 | 8  | 18 Europe | United Kingdom | Enteritidis             | Enteritidis | 3888  | 28090 |

|              |       |            |      |    |           |                |                         |             |       |       |
|--------------|-------|------------|------|----|-----------|----------------|-------------------------|-------------|-------|-------|
| SAL_CA2652AA | 40367 | SRR1967319 | 2014 | 8  | Europe    | United Kingdom | Enteritidis             | Enteritidis | 1425  | 28088 |
| SAL_CA2658AA | 46575 | SRR1967313 | 2014 | 7  | Europe    | United Kingdom | Enteritidis             | Enteritidis | 1425  | 28082 |
| SAL_CA2661AA | 38415 | SRR1967310 | 2014 | 8  | 6 Europe  | United Kingdom | Enteritidis             | Enteritidis | 1425  | 28079 |
| SAL_CA2664AA | 24986 | SRR1967307 | 2014 | 6  | 28 Europe | United Kingdom | Enteritidis             | Enteritidis | 3888  | 28076 |
| SAL_CA2668AA | 25001 | SRR1967303 | 2014 | 7  | Europe    | United Kingdom | Enteritidis             | Enteritidis | 1425  | 28072 |
| SAL_CA2671AA | 34172 | SRR1967300 | 2014 | 7  | Europe    | United Kingdom | Enteritidis             | Enteritidis | 3888  | 3643  |
| SAL_CA2673AA | 36391 | SRR1967298 | 2014 | 8  | Europe    | United Kingdom | Enteritidis             | Enteritidis | 1425  | 28068 |
| SAL_CA2674AA | 69881 | SRR1967297 | 2014 | 11 | Europe    | United Kingdom | Enteritidis             | Enteritidis | 1425  | 28067 |
| SAL_CA2685AA | 34197 | SRR1967286 | 2014 | 7  | 24 Europe | United Kingdom | Enteritidis             | Enteritidis | 3888  | 2066  |
| SAL_CA2687AA | 39515 | SRR1967284 | 2014 | 8  | 11 Europe | United Kingdom | Enteritidis             | Enteritidis | 3888  | 28056 |
| SAL_CA2688AA | 24040 | SRR1967283 | 2014 | 6  | 20 Europe | United Kingdom | Enteritidis             | Enteritidis | 3888  | 28055 |
| SAL_CA2694AA | 89106 | SRR1967277 | 2015 | 2  | Europe    | United Kingdom | Enteritidis             | Enteritidis | 1425  | 25025 |
| SAL_CA2696AA | 68704 | SRR1967275 | 2014 | 11 | Europe    | United Kingdom | Typhimurium             | Enteritidis | 1425  | 28049 |
| SAL_CA2697AA | 31920 | SRR1967274 | 2014 | 7  | Europe    | United Kingdom | Enteritidis             | Enteritidis | 26483 | 28048 |
| SAL_CA2701AA | 39436 | SRR1967270 | 2014 | 6  | Europe    | United Kingdom | Enteritidis             | Enteritidis | 1425  | 28045 |
| SAL_CA2704AA | 72302 | SRR1967267 | 2014 | 12 | Europe    | United Kingdom | Enteritidis             | Enteritidis | 1425  | 28042 |
| SAL_CA2708AA | 38351 | SRR1967263 | 2014 | 8  | Europe    | United Kingdom | Enteritidis             | Enteritidis | 3888  | 28038 |
| SAL_CA2710AA | 38411 | SRR1967261 | 2014 | 7  | 30 Europe | United Kingdom | Enteritidis             | Enteritidis | 3888  | 28037 |
| SAL_CA2716AA | 97869 | SRR1967255 | 2015 | 3  | Europe    | United Kingdom | Enteritidis             | Enteritidis | 1425  | 28031 |
| SAL_CA2726AA | 50853 | SRR1967245 | 2014 | 9  | Europe    | United Kingdom | Enteritidis             | Enteritidis | 26142 | 28021 |
| SAL_CA2728AA | 63042 | SRR1967243 | 2014 | 10 | Europe    | United Kingdom | Enteritidis             | Enteritidis | 3888  | 25253 |
| SAL_CA2736AA | 80551 | SRR1967235 | 2015 | 1  | Europe    | United Kingdom | Enteritidis             | Enteritidis | 1425  | 28014 |
| SAL_CA2739AA | 57154 | SRR1967232 | 2014 | 10 | Europe    | United Kingdom | Enteritidis             | Enteritidis | 1425  | 28011 |
| SAL_CA2740AA | 50847 | SRR1967231 | 2014 | 9  | Europe    | United Kingdom | Enteritidis             | Enteritidis | 3888  | 28010 |
| SAL_CA2743AA | 21770 | SRR1967228 | 2014 | 6  | 6 Europe  | United Kingdom | Enteritidis             | Enteritidis | 3888  | 674   |
| SAL_CA2749AA | 25262 | SRR1967222 | 2014 | 7  | Europe    | United Kingdom | Enteritidis             | Enteritidis | 1425  | 28004 |
| SAL_CA2753AA | 65367 | SRR1967218 | 2014 | 10 | Europe    | United Kingdom | Enteritidis             | Enteritidis | 1425  | 27623 |
| SAL_CA2755AA | 32525 | SRR1967216 | 2014 | 7  | 18 Europe | United Kingdom | Enteritidis             | Enteritidis | 3888  | 28000 |
| SAL_CA2756AA | 34206 | SRR1967215 | 2014 | 7  | Europe    | United Kingdom | Enteritidis             | Enteritidis | 1425  | 27999 |
| SAL_CA2767AA | 83703 | SRR1967204 | 2015 | 1  | Europe    | United Kingdom | Enteritidis             | Enteritidis | 1425  | 6917  |
| SAL_CA2769AA | 84428 | SRR1967202 | 2015 | 1  | Europe    | United Kingdom | Enteritidis             | Enteritidis | 1425  | 27988 |
| SAL_CA2772AA | 65129 | SRR1967199 | 2014 | 11 | Europe    | United Kingdom | Enteritidis             | Enteritidis | 1425  | 27985 |
| SAL_CA2773AA | 36492 | SRR1967198 | 2014 | 7  | Europe    | United Kingdom | Enteritidis             | Enteritidis | 3888  | 27984 |
| SAL_CA2774AA | 96242 | SRR1967197 | 2015 | 3  | Europe    | United Kingdom | Enteritidis             | Enteritidis | 1425  | 6917  |
| SAL_CA2779AA | 55549 | SRR1967192 | 2014 | 9  | Europe    | United Kingdom | Enteritidis             | Enteritidis | 1425  | 27979 |
| SAL_CA2784AA | 34202 | SRR1967187 | 2014 | 7  | 21 Europe | United Kingdom | Enteritidis             | Enteritidis | 3888  | 27975 |
| SAL_CA2786AA | 34196 | SRR1967185 | 2014 | 7  | 25 Europe | United Kingdom | Enteritidis             | Enteritidis | 3888  | 27973 |
| SAL_CA2788AA | 65370 | SRR1967183 | 2014 | 10 | Europe    | United Kingdom | Enteritidis             | Enteritidis | 1425  | 27971 |
| SAL_CA2792AA | 39450 | SRR1967179 | 2014 | 7  | 23 Europe | United Kingdom | Enteritidis             | Enteritidis | 3888  | 27967 |
| SAL_CA2793AA | 63905 | SRR1967178 | 2014 | 11 | Europe    | United Kingdom | Enteritidis             | Enteritidis | 1425  | 27966 |
| SAL_CA2794AA | 27034 | SRR1967177 | 2014 | 7  | Europe    | United Kingdom | Enteritidis             | Enteritidis | 1425  | 27965 |
| SAL_CA2796AA | 94088 | SRR1967175 | 2015 | 3  | Europe    | United Kingdom | Enteritidis             | Enteritidis | 1425  | 27964 |
| SAL_CA2797AA | 34185 | SRR1967174 | 2014 | 7  | 22 Europe | United Kingdom | Enteritidis             | Enteritidis | 3888  | 7153  |
| SAL_CA2799AA | 65121 | SRR1967172 | 2014 | 11 | Europe    | United Kingdom | Enteritidis             | Enteritidis | 1425  | 27961 |
| SAL_CA2800AA | 14901 | SRR1967171 | 2014 | 5  | Europe    | United Kingdom | Enteritidis             | Enteritidis | 3888  | 27960 |
| SAL_CA2801AA | 37807 | SRR1967170 | 2014 | 7  | 28 Europe | United Kingdom | Enteritidis             | Enteritidis | 3888  | 27959 |
| SAL_CA2802AA | 61859 | SRR1967169 | 2014 | 10 | 10 Europe | United Kingdom | Enteritidis             | Enteritidis | 3888  | 27958 |
| SAL_CA2807AA | 40798 | SRR1967164 | 2014 | 8  | Europe    | United Kingdom | Enteritidis             | Enteritidis | 1425  | 27954 |
| SAL_CA2809AA | 69948 | SRR1967162 | 2014 | 11 | Europe    | United Kingdom | Enteritidis             | Enteritidis | 1425  | 27952 |
| SAL_CA2811AA | 23472 | SRR1967160 | 2014 | 6  | 13 Europe | United Kingdom | Enteritidis             | Enteritidis | 3888  | 27950 |
| SAL_CA2813AA | 51261 | SRR1967158 | 2014 | 9  | Europe    | United Kingdom | Enteritidis             | Enteritidis | 1425  | 27948 |
| SAL_CA2817AA | 65399 | SRR1967154 | 2014 | 10 | Europe    | United Kingdom | Enteritidis (Predicted) | Enteritidis | 1425  | 21622 |
| SAL_CA2825AA | 84412 | SRR1967146 | 2015 | 1  | Europe    | United Kingdom | Enteritidis             | Enteritidis | 3888  | 27938 |
| SAL_CA2829AA | 27054 | SRR1967142 | 2014 | 7  | Europe    | United Kingdom | Enteritidis             | Enteritidis | 1425  | 27934 |
| SAL_CA2834AA | 52967 | SRR1967137 | 2014 | 10 | Europe    | United Kingdom | Enteritidis             | Enteritidis | 1425  | 27930 |
| SAL_CA2838AA | 68690 | SRR1967133 | 2014 | 11 | 12 Europe | United Kingdom | Enteritidis             | Enteritidis | 1425  | 27927 |
| SAL_CA2840AA | 31611 | SRR1967131 | 2014 | 7  | 14 Europe | United Kingdom | Enteritidis             | Enteritidis | 3888  | 27925 |
| SAL_CA2848AA | 63041 | SRR1967123 | 2014 | 10 | Europe    | United Kingdom | Enteritidis             | Enteritidis | 1425  | 27918 |
| SAL_CA2850AA | 65390 | SRR1967121 | 2014 | 9  | 12 Europe | United Kingdom | Enteritidis             | Enteritidis | 3888  | 24946 |

|              |       |            |      |    |           |                |             |             |       |       |
|--------------|-------|------------|------|----|-----------|----------------|-------------|-------------|-------|-------|
| SAL_CA2852AA | 45618 | SRR1967119 | 2014 | 9  | Europe    | United Kingdom | Enteritidis | Enteritidis | 3888  | 27916 |
| SAL_CA2856AA | 32473 | SRR1967115 | 2014 | 7  | Europe    | United Kingdom | Enteritidis | Enteritidis | 3888  | 27912 |
| SAL_CA2860AA | 45609 | SRR1967111 | 2014 | 9  | Europe    | United Kingdom | Enteritidis | Enteritidis | 1425  | 27908 |
| SAL_CA2862AA | 90524 | SRR1967109 | 2015 | 2  | Europe    | United Kingdom | Enteritidis | Enteritidis | 1425  | 25546 |
| SAL_CA2863AA | 63629 | SRR1967108 | 2014 | 9  | Europe    | United Kingdom | Enteritidis | Enteritidis | 1425  | 27906 |
| SAL_CA2872AA | 21776 | SRR1967099 | 2014 | 6  | 3 Europe  | United Kingdom | Enteritidis | Enteritidis | 3888  | 27897 |
| SAL_CA2877AA | 9284  | SRR1967094 | 2014 | 5  | Europe    | United Kingdom | Enteritidis | Enteritidis | 1425  | 27892 |
| SAL_CA2879AA | 65382 | SRR1967092 | 2014 | 10 | Europe    | United Kingdom | Enteritidis | Enteritidis | 3906  | 27890 |
| SAL_CA2880AA | 85708 | SRR1967091 | 2015 | 2  | Europe    | United Kingdom | Enteritidis | Enteritidis | 1425  | 27237 |
| SAL_CA2882AA | 36524 | SRR1967089 | 2014 | 7  | 22 Europe | United Kingdom | Enteritidis | Enteritidis | 3888  | 27888 |
| SAL_CA2885AA | 13365 | SRR1967086 | 2014 | 4  | Europe    | United Kingdom | Enteritidis | Enteritidis | 1425  | 27885 |
| SAL_CA2886AA | 32472 | SRR1967085 | 2014 | 7  | 18 Europe | United Kingdom | Enteritidis | Enteritidis | 3888  | 2066  |
| SAL_CA2891AA | 34186 | SRR1967080 | 2014 | 7  | 25 Europe | United Kingdom | Enteritidis | Enteritidis | 3888  | 2066  |
| SAL_CA2895AA | 52972 | SRR1967076 | 2014 | 9  | 26 Europe | United Kingdom | Enteritidis | Enteritidis | 3888  | 2066  |
| SAL_CA2900AA | 36493 | SRR1967071 | 2014 | 7  | Europe    | United Kingdom | Enteritidis | Enteritidis | 1425  | 7771  |
| SAL_CA2908AA | 5873  | SRR1967063 | 2014 | 4  | Europe    | United Kingdom | Enteritidis | Enteritidis | 1425  | 27871 |
| SAL_CA2910AA | 7408  | SRR1967061 | 2014 | 4  | Europe    | United Kingdom | Enteritidis | Enteritidis | 1425  | 27869 |
| SAL_CA2914AA | 12185 | SRR1967057 | 2014 | 5  | 13 Europe | United Kingdom | Enteritidis | Enteritidis | 1425  | 27866 |
| SAL_CA2915AA | 22207 | SRR1967056 | 2014 | 6  | Europe    | United Kingdom | Enteritidis | Enteritidis | 1425  | 27865 |
| SAL_CA2918AA | 34198 | SRR1967053 | 2014 | 7  | 24 Europe | United Kingdom | Enteritidis | Enteritidis | 3888  | 27863 |
| SAL_CA2919AA | 69923 | SRR1967052 | 2014 | 11 | Europe    | United Kingdom | Enteritidis | Enteritidis | 1425  | 27862 |
| SAL_CA2925AA | 46582 | SRR1967046 | 2014 | 7  | 16 Europe | United Kingdom | Enteritidis | Enteritidis | 3888  | 27858 |
| SAL_CA2930AA | 6467  | SRR1967041 | 2014 | 4  | Europe    | United Kingdom | Enteritidis | Enteritidis | 3888  | 27854 |
| SAL_CA2932AA | 46591 | SRR1967039 | 2014 | 7  | 18 Europe | United Kingdom | Enteritidis | Enteritidis | 3888  | 27852 |
| SAL_CA2933AA | 37814 | SRR1967038 | 2014 | 7  | 30 Europe | United Kingdom | Enteritidis | Enteritidis | 3888  | 27851 |
| SAL_CA2937AA | 63652 | SRR1967034 | 2014 | 10 | Europe    | United Kingdom | Enteritidis | Enteritidis | 1425  | 25859 |
| SAL_CA2938AA | 36389 | SRR1967033 | 2014 | 8  | Europe    | United Kingdom | Enteritidis | Enteritidis | 1425  | 27848 |
| SAL_CA2942AA | 22251 | SRR1967029 | 2014 | 6  | Europe    | United Kingdom | Enteritidis | Enteritidis | 3900  | 25940 |
| SAL_CA2943AA | 38419 | SRR1967028 | 2014 | 7  | 29 Europe | United Kingdom | Enteritidis | Enteritidis | 3888  | 27844 |
| SAL_CA2948AA | 83587 | SRR1967023 | 2015 | 1  | Europe    | United Kingdom | Enteritidis | Enteritidis | 1425  | 27841 |
| SAL_CA2952AA | 63914 | SRR1967019 | 2014 | 11 | 5 Europe  | United Kingdom | Enteritidis | Enteritidis | 1425  | 27838 |
| SAL_CA2953AA | 40800 | SRR1967018 | 2014 | 8  | Europe    | United Kingdom | Enteritidis | Enteritidis | 3888  | 27837 |
| SAL_CA2959AA | 32391 | SRR1967012 | 2014 | 7  | Europe    | United Kingdom | Enteritidis | Enteritidis | 1425  | 27831 |
| SAL_CA2962AA | 36381 | SRR1967009 | 2014 | 8  | Europe    | United Kingdom | Enteritidis | Enteritidis | 1425  | 27828 |
| SAL_CA2965AA | 73223 | SRR1967006 | 2014 | 12 | 10 Europe | United Kingdom | Enteritidis | Enteritidis | 28482 | 27825 |
| SAL_CA2967AA | 41993 | SRR1967004 | 2014 | 8  | Europe    | United Kingdom | Enteritidis | Enteritidis | 1425  | 27824 |
| SAL_CA2969AA | 36501 | SRR1967002 | 2014 | 7  | 17 Europe | United Kingdom | Enteritidis | Enteritidis | 3888  | 27822 |
| SAL_CA2976AA | 56157 | SRR1966995 | 2014 | 9  | Europe    | United Kingdom | Enteritidis | Enteritidis | 1425  | 27815 |
| SAL_CA2986AA | 37034 | SRR1966985 | 2014 | 8  | Europe    | United Kingdom | Enteritidis | Enteritidis | 3888  | 27805 |
| SAL_CA2987AA | 27067 | SRR1966984 | 2014 | 7  | 7 Europe  | United Kingdom | Enteritidis | Enteritidis | 3888  | 674   |
| SAL_CA2990AA | 96973 | SRR1966981 | 2015 | 3  | Europe    | United Kingdom | Enteritidis | Enteritidis | 1425  | 7575  |
| SAL_CA2993AA | 36496 | SRR1966978 | 2014 | 7  | Europe    | United Kingdom | Enteritidis | Enteritidis | 3888  | 27800 |
| SAL_CA2995AA | 94269 | SRR1966976 | 2015 | 3  | Europe    | United Kingdom | Enteritidis | Enteritidis | 1425  | 27798 |
| SAL_CA2997AA | 45619 | SRR1966974 | 2014 | 9  | Europe    | United Kingdom | Enteritidis | Enteritidis | 26483 | 24903 |
| SAL_CA2999AA | 83701 | SRR1966972 | 2015 | 1  | Europe    | United Kingdom | Enteritidis | Enteritidis | 1425  | 27795 |
| SAL_CA3000AA | 38319 | SRR1966971 | 2014 | 7  | 28 Europe | United Kingdom | Enteritidis | Enteritidis | 3888  | 27794 |
| SAL_CA3001AA | 84458 | SRR1966970 | 2015 | 2  | Europe    | United Kingdom | Enteritidis | Enteritidis | 1425  | 27793 |
| SAL_CA3002AA | 38313 | SRR1966969 | 2014 | 7  | 28 Europe | United Kingdom | Enteritidis | Enteritidis | 3888  | 27792 |
| SAL_CA3003AA | 45621 | SRR1966968 | 2014 | 9  | Europe    | United Kingdom | Enteritidis | Enteritidis | 1425  | 27791 |
| SAL_CA3004AA | 65458 | SRR1966967 | 2014 | 10 | Europe    | United Kingdom | Enteritidis | Enteritidis | 3888  | 27790 |
| SAL_CA3005AA | 68974 | SRR1966966 | 2014 | 11 | Europe    | United Kingdom | Enteritidis | Enteritidis | 1425  | 27789 |
| SAL_CA3007AA | 90470 | SRR1966964 | 2015 | 2  | Europe    | United Kingdom | Enteritidis | Enteritidis | 1425  | 27787 |
| SAL_CA3011AA | 91216 | SRR1966960 | 2015 | 2  | Europe    | United Kingdom | Enteritidis | Enteritidis | 1425  | 651   |
| SAL_CA3020AA | 37758 | SRR1966951 | 2014 | 8  | Europe    | United Kingdom | Enteritidis | Enteritidis | 3888  | 27775 |
| SAL_CA3025AA | 36463 | SRR1966946 | 2014 | 7  | Europe    | United Kingdom | Enteritidis | Enteritidis | 1425  | 27771 |
| SAL_CA3031AA | 22227 | SRR1966940 | 2014 | 6  | Europe    | United Kingdom | Enteritidis | Enteritidis | 1425  | 27765 |
| SAL_CA3033AA | 65056 | SRR1966938 | 2014 | 11 | Europe    | United Kingdom | Enteritidis | Enteritidis | 1425  | 24563 |
| SAL_CA3034AA | 36525 | SRR1966937 | 2014 | 7  | 24 Europe | United Kingdom | Enteritidis | Enteritidis | 3888  | 27763 |
| SAL_CA3036AA | 14128 | SRR1966935 | 2014 | 5  | 22 Europe | United Kingdom | Enteritidis | Enteritidis | 3888  | 27761 |



|              |       |            |      |    |           |                |             |             |       |       |
|--------------|-------|------------|------|----|-----------|----------------|-------------|-------------|-------|-------|
| SAL_CA3040AA | 57106 | SRR1966931 | 2014 | 8  | Europe    | United Kingdom | Enteritidis | Enteritidis | 1425  | 27757 |
| SAL_CA3043AA | 34171 | SRR1966928 | 2014 | 7  | 24 Europe | United Kingdom | Enteritidis | Enteritidis | 3888  | 27755 |
| SAL_CA3045AA | 38414 | SRR1966926 | 2014 | 8  | 6 Europe  | United Kingdom | Enteritidis | Enteritidis | 1425  | 27753 |
| SAL_CA3048AA | 37833 | SRR1966923 | 2014 | 7  | 30 Europe | United Kingdom | Enteritidis | Enteritidis | 3888  | 27750 |
| SAL_CA3050AA | 63039 | SRR1966921 | 2014 | 10 | Europe    | United Kingdom | Enteritidis | Enteritidis | 1425  | 27747 |
| SAL_CA3052AA | 14506 | SRR1966919 | 2014 | 5  | Europe    | United Kingdom | Enteritidis | Enteritidis | 3906  | 27745 |
| SAL_CA3055AA | 12129 | SRR1966916 | 2014 | 5  | Europe    | United Kingdom | Enteritidis | Enteritidis | 1425  | 27743 |
| SAL_CA3060AA | 73221 | SRR1966911 | 2014 | 12 | 8 Europe  | United Kingdom | Enteritidis | Enteritidis | 3888  | 27738 |
| SAL_CA3062AA | 96978 | SRR1966909 | 2015 | 3  | Europe    | United Kingdom | Enteritidis | Enteritidis | 1425  | 27736 |
| SAL_CA3068AA | 80594 | SRR1966903 | 2015 | 1  | Europe    | United Kingdom | Enteritidis | Enteritidis | 1425  | 27731 |
| SAL_CA3071AA | 45616 | SRR1966900 | 2014 | 9  | Europe    | United Kingdom | Enteritidis | Enteritidis | 1425  | 27728 |
| SAL_CA3072AA | 21764 | SRR1966899 | 2014 | 6  | Europe    | United Kingdom | Enteritidis | Enteritidis | 1425  | 27727 |
| SAL_CA3077AA | 40279 | SRR1966894 | 2014 | 8  | Europe    | United Kingdom | Enteritidis | Enteritidis | 1425  | 27722 |
| SAL_CA3078AA | 41996 | SRR1966893 | 2014 | 8  | Europe    | United Kingdom | Enteritidis | Enteritidis | 3888  | 27721 |
| SAL_CA3079AA | 3743  | SRR1966892 | 2014 | 4  | Europe    | United Kingdom | Enteritidis | Enteritidis | 1425  | 27720 |
| SAL_CA3087AA | 63729 | SRR1966884 | 2014 | 10 | Europe    | United Kingdom | Enteritidis | Enteritidis | 1425  | 27712 |
| SAL_CA3097AA | 90514 | SRR1966874 | 2015 | 2  | Europe    | United Kingdom | Enteritidis | Enteritidis | 1425  | 27706 |
| SAL_CA3105AA | 94264 | SRR1966866 | 2015 | 3  | Europe    | United Kingdom | Enteritidis | Enteritidis | 1425  | 27700 |
| SAL_CA3106AA | 3753  | SRR1966865 | 2014 | 4  | Europe    | United Kingdom | Enteritidis | Enteritidis | 3888  | 27699 |
| SAL_CA3108AA | 50876 | SRR1966863 | 2014 | 9  | Europe    | United Kingdom | Enteritidis | Enteritidis | 3888  | 27697 |
| SAL_CA3110AA | 5878  | SRR1966861 | 2014 | 4  | Europe    | United Kingdom | Enteritidis | Enteritidis | 1425  | 20758 |
| SAL_CA3113AA | 21786 | SRR1966858 | 2014 | 6  | 3 Europe  | United Kingdom | Enteritidis | Enteritidis | 3888  | 674   |
| SAL_CA3114AA | 89885 | SRR1966857 | 2015 | 2  | Europe    | United Kingdom | Enteritidis | Enteritidis | 1425  | 7683  |
| SAL_CA3118AA | 13804 | SRR1966853 | 2014 | 5  | Europe    | United Kingdom | Enteritidis | Enteritidis | 26481 | 27690 |
| SAL_CA3120AA | 34189 | SRR1966851 | 2014 | 7  | 25 Europe | United Kingdom | Enteritidis | Enteritidis | 3888  | 27688 |
| SAL_CA3125AA | 23496 | SRR1966846 | 2014 | 6  | Europe    | United Kingdom | Enteritidis | Enteritidis | 3888  | 27684 |
| SAL_CA3141AA | 32459 | SRR1966830 | 2014 | 7  | 17 Europe | United Kingdom | Enteritidis | Enteritidis | 3888  | 2066  |
| SAL_CA3142AA | 38362 | SRR1966829 | 2014 | 8  | Europe    | United Kingdom | Enteritidis | Enteritidis | 3888  | 27672 |
| SAL_CA3146AA | 40281 | SRR1966825 | 2014 | 8  | Europe    | United Kingdom | Enteritidis | Enteritidis | 26142 | 27669 |
| SAL_CA3150AA | 25325 | SRR1966821 | 2014 | 7  | Europe    | United Kingdom | Enteritidis | Enteritidis | 1425  | 27665 |
| SAL_CA3153AA | 63774 | SRR1966818 | 2014 | 10 | Europe    | United Kingdom | Enteritidis | Enteritidis | 3906  | 27662 |
| SAL_CA3159AA | 95046 | SRR1966812 | 2015 | 3  | Europe    | United Kingdom | Enteritidis | Enteritidis | -1662 | 27657 |
| SAL_CA3161AA | 37117 | SRR1966810 | 2014 | 8  | Europe    | United Kingdom | Enteritidis | Enteritidis | 1425  | 27655 |
| SAL_CA3165AA | 63673 | SRR1966806 | 2014 | 10 | Europe    | United Kingdom | Enteritidis | Enteritidis | 1425  | 25482 |
| SAL_CA3166AA | 29388 | SRR1966805 | 2014 | 7  | Europe    | United Kingdom | Enteritidis | Enteritidis | 1425  | 27652 |
| SAL_CA3167AA | 23064 | SRR1966804 | 2014 | 6  | Europe    | United Kingdom | Enteritidis | Enteritidis | 1425  | 27651 |
| SAL_CA3168AA | 95018 | SRR1966803 | 2015 | 3  | Europe    | United Kingdom | Enteritidis | Enteritidis | 1425  | 27650 |
| SAL_CA3174AA | 12132 | SRR1966797 | 2014 | 5  | Europe    | United Kingdom | Enteritidis | Enteritidis | 1425  | 27645 |
| SAL_CA3182AA | 85736 | SRR1966789 | 2015 | 2  | Europe    | United Kingdom | Enteritidis | Enteritidis | 3888  | 27637 |
| SAL_CA3190AA | 90163 | SRR1966781 | 2015 | 2  | Europe    | United Kingdom | Enteritidis | Enteritidis | 1425  | 27630 |
| SAL_CA3193AA | 63579 | SRR1966778 | 2014 | 10 | Europe    | United Kingdom | Enteritidis | Enteritidis | 1425  | 27628 |
| SAL_CA3196AA | 96237 | SRR1966775 | 2015 | 3  | Europe    | United Kingdom | Enteritidis | Enteritidis | 1425  | 27625 |
| SAL_CA3199AA | 63703 | SRR1966772 | 2014 | 10 | Europe    | United Kingdom | Enteritidis | Enteritidis | 1425  | 27623 |
| SAL_CA3200AA | 84403 | SRR1966771 | 2014 | 12 | Europe    | United Kingdom | Enteritidis | Enteritidis | 1425  | 27622 |
| SAL_CA3201AA | 40283 | SRR1966770 | 2014 | 8  | Europe    | United Kingdom | Enteritidis | Enteritidis | 3888  | 27621 |
| SAL_CA3206AA | 36380 | SRR1966765 | 2014 | 8  | Europe    | United Kingdom | Enteritidis | Enteritidis | 1425  | 27616 |
| SAL_CA3209AA | 89094 | SRR1966762 | 2015 | 2  | Europe    | United Kingdom | Enteritidis | Enteritidis | 1425  | 27613 |
| SAL_CA3216AA | 38316 | SRR1966755 | 2014 | 7  | 28 Europe | United Kingdom | Enteritidis | Enteritidis | 3888  | 27608 |
| SAL_CA3217AA | 50354 | SRR1966754 | 2014 | 9  | Europe    | United Kingdom | Enteritidis | Enteritidis | 1425  | 27607 |
| SAL_CA3221AA | 50352 | SRR1966750 | 2014 | 9  | Europe    | United Kingdom | Enteritidis | Enteritidis | 1425  | 27603 |
| SAL_CA3224AA | 90510 | SRR1966747 | 2015 | 2  | Europe    | United Kingdom | Enteritidis | Enteritidis | 1425  | 27600 |
| SAL_CA3226AA | 37111 | SRR1966745 | 2014 | 8  | 6 Europe  | United Kingdom | Enteritidis | Enteritidis | 3888  | 27599 |
| SAL_CA3230AA | 34173 | SRR1966741 | 2014 | 7  | Europe    | United Kingdom | Enteritidis | Enteritidis | 3888  | 27595 |
| SAL_CA3233AA | 65381 | SRR1966738 | 2014 | 10 | Europe    | United Kingdom | Enteritidis | Enteritidis | 1425  | 27592 |
| SAL_CA3241AA | 32469 | SRR1966730 | 2014 | 7  | Europe    | United Kingdom | Enteritidis | Enteritidis | 1425  | 27584 |
| SAL_CA3247AA | 34194 | SRR1966724 | 2014 | 7  | 24 Europe | United Kingdom | Enteritidis | Enteritidis | 3888  | 7153  |
| SAL_CA3248AA | 65019 | SRR1966723 | 2014 | 11 | 4 Europe  | United Kingdom | Enteritidis | Enteritidis | 1425  | 27579 |
| SAL_CA3253AA | 63672 | SRR1966718 | 2014 | 10 | Europe    | United Kingdom | Enteritidis | Enteritidis | 3888  | 27574 |
| SAL_CA3255AA | 40217 | SRR1966716 | 2014 | 8  | Europe    | United Kingdom | Enteritidis | Enteritidis | 1425  | 27572 |

|              |       |            |      |    |    |        |                |             |             |       |       |
|--------------|-------|------------|------|----|----|--------|----------------|-------------|-------------|-------|-------|
| SAL_CA3256AA | 38772 | SRR1966715 | 2014 | 8  | 6  | Europe | United Kingdom | Enteritidis | Enteritidis | 3888  | 27571 |
| SAL_CA3259AA | 39507 | SRR1966712 | 2014 | 8  |    | Europe | United Kingdom | Enteritidis | Enteritidis | 1425  | 27569 |
| SAL_CA3269AA | 63913 | SRR1966702 | 2014 | 11 |    | Europe | United Kingdom | Enteritidis | Enteritidis | 1425  | 27560 |
| SAL_CA3274AA | 98257 | SRR1966697 | 2015 | 3  |    | Europe | United Kingdom | Enteritidis | Enteritidis | 1425  | 2479  |
| SAL_CA3276AA | 75970 | SRR1966695 | 2014 | 12 |    | Europe | United Kingdom | Enteritidis | Enteritidis | 1425  | 27555 |
| SAL_CA3278AA | 39438 | SRR1966693 | 2014 | 6  |    | Europe | United Kingdom | Enteritidis | Enteritidis | 3888  | 27553 |
| SAL_CA3279AA | 39455 | SRR1966692 | 2014 | 7  | 30 | Europe | United Kingdom | Enteritidis | Enteritidis | 3888  | 27552 |
| SAL_CA3280AA | 38346 | SRR1966691 | 2014 | 8  |    | Europe | United Kingdom | Enteritidis | Enteritidis | 1425  | 27551 |
| SAL_CA3281AA | 55543 | SRR1966690 | 2014 | 9  |    | Europe | United Kingdom | Enteritidis | Enteritidis | 1425  | 27550 |
| SAL_CA3282AA | 26635 | SRR1966689 | 2014 | 7  |    | Europe | United Kingdom | Enteritidis | Enteritidis | 1425  | 27549 |
| SAL_CA3285AA | 63043 | SRR1966686 | 2014 | 10 |    | Europe | United Kingdom | Enteritidis | Enteritidis | 3888  | 27547 |
| SAL_CA3286AA | 32470 | SRR1966685 | 2014 | 7  | 17 | Europe | United Kingdom | Enteritidis | Enteritidis | 3888  | 27546 |
| SAL_CA3287AA | 9249  | SRR1966684 | 2014 | 4  |    | Europe | United Kingdom | Enteritidis | Enteritidis | 1425  | 27545 |
| SAL_CA3295AA | 90496 | SRR1966676 | 2015 | 2  |    | Europe | United Kingdom | Enteritidis | Enteritidis | 1425  | 27537 |
| SAL_CA3299AA | 87346 | SRR1966672 | 2015 | 2  |    | Europe | United Kingdom | Enteritidis | Enteritidis | 1425  | 27533 |
| SAL_CA3308AA | 14508 | SRR1966663 | 2014 | 5  |    | Europe | United Kingdom | Enteritidis | Enteritidis | 1425  | 27526 |
| SAL_CA3312AA | 40270 | SRR1966659 | 2014 | 8  |    | Europe | United Kingdom | Enteritidis | Enteritidis | 1425  | 27522 |
| SAL_CA3321AA | 23080 | SRR1966650 | 2014 | 6  |    | Europe | United Kingdom | Enteritidis | Enteritidis | 1425  | 27513 |
| SAL_CA3322AA | 41990 | SRR1966649 | 2014 | 8  |    | Europe | United Kingdom | Enteritidis | Enteritidis | 3888  | 27512 |
| SAL_CA3324AA | 37816 | SRR1966647 | 2014 | 8  |    | Europe | United Kingdom | Enteritidis | Enteritidis | 3888  | 24765 |
| SAL_CA3325AA | 27068 | SRR1966646 | 2014 | 7  |    | Europe | United Kingdom | Enteritidis | Enteritidis | 1425  | 27510 |
| SAL_CA3327AA | 3740  | SRR1966644 | 2014 | 4  |    | Europe | United Kingdom | Enteritidis | Enteritidis | 1425  | 27508 |
| SAL_CA3328AA | 94094 | SRR1966643 | 2015 | 3  |    | Europe | United Kingdom | Enteritidis | Enteritidis | 1425  | 613   |
| SAL_CA3337AA | 68971 | SRR1966633 | 2014 | 11 |    | Europe | United Kingdom | Enteritidis | Enteritidis | 1425  | 27500 |
| SAL_CA3339AA | 65049 | SRR1966631 | 2014 | 11 |    | Europe | United Kingdom | Enteritidis | Enteritidis | -1662 | 27498 |
| SAL_CA3342AA | 73134 | SRR1966628 | 2014 | 12 | 1  | Europe | United Kingdom | Enteritidis | Enteritidis | 3888  | 27495 |
| SAL_CA3343AA | 41998 | SRR1966627 | 2014 | 8  |    | Europe | United Kingdom | Enteritidis | Enteritidis | 1425  | 27494 |
| SAL_CA3345AA | 56112 | SRR1966625 | 2014 | 9  | 12 | Europe | United Kingdom | Enteritidis | Enteritidis | 3888  | 27492 |
| SAL_CA3347AA | 67570 | SRR1966623 | 2014 | 11 |    | Europe | United Kingdom | Enteritidis | Enteritidis | 1425  | 27381 |
| SAL_CA3351AA | 56151 | SRR1966619 | 2014 | 9  |    | Europe | United Kingdom | Enteritidis | Enteritidis | 3888  | 27487 |
| SAL_CA3359AA | 83588 | SRR1966609 | 2015 | 1  | 27 | Europe | United Kingdom | Enteritidis | Enteritidis | 1425  | 27480 |
| SAL_CA3361AA | 37004 | SRR1966607 | 2014 | 8  |    | Europe | United Kingdom | Enteritidis | Enteritidis | 3906  | 27478 |
| SAL_CA3363AA | 36498 | SRR1966605 | 2014 | 7  | 28 | Europe | United Kingdom | Enteritidis | Enteritidis | 3888  | 27476 |
| SAL_CA3367AA | 32465 | SRR1966601 | 2014 | 7  |    | Europe | United Kingdom | Enteritidis | Enteritidis | 1425  | 27473 |
| SAL_CA3372AA | 42004 | SRR1966596 | 2014 | 8  |    | Europe | United Kingdom | Enteritidis | Enteritidis | 1425  | 27469 |
| SAL_CA3373AA | 51262 | SRR1966595 | 2014 | 9  | 17 | Europe | United Kingdom | Enteritidis | Enteritidis | 1425  | 27468 |
| SAL_CA3376AA | 93569 | SRR1966592 | 2015 | 3  |    | Europe | United Kingdom | Enteritidis | Enteritidis | 28416 | 25524 |
| SAL_CA3379AA | 69283 | SRR1966588 | 2014 | 11 |    | Europe | United Kingdom | Enteritidis | Enteritidis | 26465 | 27464 |
| SAL_CA3380AA | 87348 | SRR1966587 | 2015 | 2  |    | Europe | United Kingdom | Enteritidis | Enteritidis | 26481 | 25998 |
| SAL_CA3383AA | 40293 | SRR1966584 | 2014 | 8  |    | Europe | United Kingdom | Enteritidis | Enteritidis | 1425  | 27461 |
| SAL_CA3384AA | 5880  | SRR1966583 | 2014 | 4  |    | Europe | United Kingdom | Enteritidis | Enteritidis | 1425  | 27460 |
| SAL_CA3385AA | 23473 | SRR1966582 | 2014 | 6  | 13 | Europe | United Kingdom | Enteritidis | Enteritidis | 3888  | 27459 |
| SAL_CA3388AA | 31971 | SRR1966579 | 2014 | 7  |    | Europe | United Kingdom | Enteritidis | Enteritidis | 1425  | 27457 |
| SAL_CA3399AA | 24056 | SRR1966568 | 2014 | 6  |    | Europe | United Kingdom | Enteritidis | Enteritidis | 1425  | 27446 |
| SAL_CA3408AA | 63935 | SRR1966559 | 2014 | 11 |    | Europe | United Kingdom | Enteritidis | Enteritidis | 1425  | 25143 |
| SAL_CA3413AA | 31922 | SRR1966554 | 2014 | 7  | 21 | Europe | United Kingdom | Enteritidis | Enteritidis | 3888  | 7612  |
| SAL_CA3414AA | 3761  | SRR1966553 | 2014 | 4  |    | Europe | United Kingdom | Enteritidis | Enteritidis | 3888  | 27433 |
| SAL_CA3415AA | 83354 | SRR1966552 | 2015 | 1  |    | Europe | United Kingdom | Enteritidis | Enteritidis | 1425  | 27432 |
| SAL_CA3421AA | 63606 | SRR1966546 | 2014 | 9  |    | Europe | United Kingdom | Enteritidis | Enteritidis | 1425  | 27427 |
| SAL_CA3431AA | 68972 | SRR1966536 | 2014 | 11 | 11 | Europe | United Kingdom | Enteritidis | Enteritidis | 3888  | 7317  |
| SAL_CA3433AA | 39484 | SRR1966534 | 2014 | 8  |    | Europe | United Kingdom | Enteritidis | Enteritidis | 3888  | 27417 |
| SAL_CA3435AA | 53090 | SRR1966532 | 2014 | 9  |    | Europe | United Kingdom | Enteritidis | Enteritidis | 3888  | 27415 |
| SAL_CA3442AA | 38342 | SRR1966525 | 2014 | 8  |    | Europe | United Kingdom | Enteritidis | Enteritidis | 1425  | 27410 |
| SAL_CA3446AA | 55581 | SRR1966521 | 2014 | 9  |    | Europe | United Kingdom | Enteritidis | Enteritidis | 3888  | 7867  |
| SAL_CA3454AA | 37101 | SRR1966512 | 2014 | 8  |    | Europe | United Kingdom | Enteritidis | Enteritidis | 1425  | 27404 |
| SAL_CA3455AA | 69882 | SRR1966511 | 2014 | 11 |    | Europe | United Kingdom | Enteritidis | Enteritidis | 1425  | 27403 |
| SAL_CA3456AA | 14136 | SRR1966510 | 2014 | 5  |    | Europe | United Kingdom | Enteritidis | Enteritidis | 3888  | 27402 |
| SAL_CA3458AA | 34200 | SRR1966508 | 2014 | 7  |    | Europe | United Kingdom | Enteritidis | Enteritidis | 26465 | 27400 |
| SAL_CA3459AA | 37812 | SRR1966507 | 2014 | 7  | 31 | Europe | United Kingdom | Enteritidis | Enteritidis | 3888  | 27399 |

|              |       |            |      |    |           |                |             |             |      |       |
|--------------|-------|------------|------|----|-----------|----------------|-------------|-------------|------|-------|
| SAL_CA3462AA | 63934 | SRR1966504 | 2014 | 11 | Europe    | United Kingdom | Enteritidis | Enteritidis | 1425 | 27396 |
| SAL_CA3464AA | 36392 | SRR1966502 | 2014 | 8  | 4 Europe  | United Kingdom | Enteritidis | Enteritidis | 3888 | 27394 |
| SAL_CA3468AA | 57162 | SRR1966498 | 2014 | 10 | Europe    | United Kingdom | Enteritidis | Enteritidis | 1425 | 27390 |
| SAL_CA3469AA | 69950 | SRR1966497 | 2014 | 11 | Europe    | United Kingdom | Enteritidis | Enteritidis | 1425 | 27389 |
| SAL_CA3471AA | 65376 | SRR1966495 | 2014 | 10 | Europe    | United Kingdom | Enteritidis | Enteritidis | 1425 | 6917  |
| SAL_CA3475AA | 37822 | SRR1966491 | 2014 | 7  | 30 Europe | United Kingdom | Enteritidis | Enteritidis | 3888 | 27384 |
| SAL_CA3478AA | 63912 | SRR1966488 | 2014 | 11 | Europe    | United Kingdom | Enteritidis | Enteritidis | 1425 | 27381 |
| SAL_CA3479AA | 83586 | SRR1966487 | 2015 | 1  | Europe    | United Kingdom | Enteritidis | Enteritidis | 1425 | 27380 |
| SAL_CA3480AA | 38318 | SRR1966486 | 2014 | 7  | 28 Europe | United Kingdom | Enteritidis | Enteritidis | 3888 | 27379 |
| SAL_CA3484AA | 21781 | SRR1966482 | 2014 | 6  | 2 Europe  | United Kingdom | Enteritidis | Enteritidis | 3888 | 27375 |
| SAL_CA3485AA | 39451 | SRR1966481 | 2014 | 8  | Europe    | United Kingdom | Enteritidis | Enteritidis | 3906 | 27374 |
| SAL_CA3488AA | 68909 | SRR1966478 | 2014 | 6  | 24 Europe | United Kingdom | Enteritidis | Enteritidis | 3888 | 27371 |
| SAL_CA3489AA | 63906 | SRR1966477 | 2014 | 11 | Europe    | United Kingdom | Enteritidis | Enteritidis | 3888 | 27370 |
| SAL_CA3494AA | 63023 | SRR1966472 | 2014 | 10 | Europe    | United Kingdom | Enteritidis | Enteritidis | 1425 | 27365 |
| SAL_CA3496AA | 51275 | SRR1966470 | 2014 | 9  | Europe    | United Kingdom | Enteritidis | Enteritidis | 1425 | 27363 |
| SAL_CA3497AA | 73108 | SRR1966469 | 2014 | 12 | Europe    | United Kingdom | Enteritidis | Enteritidis | 1425 | 27362 |
| SAL_CA3504AA | 63620 | SRR1966462 | 2014 | 9  | Europe    | United Kingdom | Enteritidis | Enteritidis | 1425 | 27355 |
| SAL_CA3505AA | 61839 | SRR1966461 | 2014 | 10 | Europe    | United Kingdom | Enteritidis | Enteritidis | 1425 | 27354 |
| SAL_CA3511AA | 84446 | SRR1966455 | 2015 | 2  | Europe    | United Kingdom | Enteritidis | Enteritidis | 1425 | 2097  |
| SAL_CA3513AA | 51265 | SRR1966453 | 2014 | 9  | Europe    | United Kingdom | Enteritidis | Enteritidis | 3888 | 7810  |
| SAL_CA3518AA | 21778 | SRR1966448 | 2014 | 6  | 12 Europe | United Kingdom | Enteritidis | Enteritidis | 3888 | 674   |
| SAL_CA3519AA | 39449 | SRR1966447 | 2014 | 7  | 21 Europe | United Kingdom | Enteritidis | Enteritidis | 3888 | 27345 |
| SAL_CA3524AA | 57141 | SRR1966442 | 2014 | 10 | Europe    | United Kingdom | Pensacola   | Enteritidis | 1425 | 27340 |
| SAL_CA3536AA | 51259 | SRR1966430 | 2014 | 9  | Europe    | United Kingdom | Enteritidis | Enteritidis | 1425 | 27329 |
| SAL_CA3540AA | 5921  | SRR1966426 | 2014 | 4  | Europe    | United Kingdom | Enteritidis | Enteritidis | 1425 | 27325 |
| SAL_CA3544AA | 12183 | SRR1966422 | 2014 | 5  | Europe    | United Kingdom | Enteritidis | Enteritidis | 1425 | 27321 |
| SAL_CA3545AA | 96954 | SRR1966421 | 2015 | 3  | Europe    | United Kingdom | Enteritidis | Enteritidis | 1425 | 27320 |
| SAL_CA3546AA | 63881 | SRR1966420 | 2014 | 11 | Europe    | United Kingdom | Enteritidis | Enteritidis | 3888 | 27319 |
| SAL_CA3547AA | 62984 | SRR1966419 | 2014 | 9  | Europe    | United Kingdom | Enteritidis | Enteritidis | 1425 | 27318 |
| SAL_CA3550AA | 91900 | SRR1966417 | 2014 | 11 | Europe    | United Kingdom | Enteritidis | Enteritidis | 1425 | 27315 |
| SAL_CA3552AA | 32393 | SRR1966415 | 2014 | 7  | Europe    | United Kingdom | Enteritidis | Enteritidis | 1425 | 27313 |
| SAL_CA3561AA | 51249 | SRR1966406 | 2014 | 9  | Europe    | United Kingdom | Enteritidis | Enteritidis | 1425 | 27304 |
| SAL_CA3574AA | 25264 | SRR1966393 | 2014 | 7  | Europe    | United Kingdom | Enteritidis | Enteritidis | 1425 | 27293 |
| SAL_CA3576AA | 27799 | SRR1966391 | 2014 | 7  | Europe    | United Kingdom | Enteritidis | Enteritidis | 1425 | 27291 |
| SAL_CA3579AA | 14125 | SRR1966388 | 2014 | 5  | Europe    | United Kingdom | Enteritidis | Enteritidis | 1425 | 27288 |
| SAL_CA3580AA | 31928 | SRR1966387 | 2014 | 7  | 21 Europe | United Kingdom | Enteritidis | Enteritidis | 3888 | 27287 |
| SAL_CA3584AA | 46585 | SRR1966383 | 2014 | 7  | 18 Europe | United Kingdom | Enteritidis | Enteritidis | 3888 | 27283 |
| SAL_CA3586AA | 23077 | SRR1966381 | 2014 | 6  | Europe    | United Kingdom | Enteritidis | Enteritidis | 1425 | 27281 |
| SAL_CA3602AA | 57105 | SRR1966365 | 2014 | 8  | Europe    | United Kingdom | Enteritidis | Enteritidis | 1425 | 27266 |
| SAL_CA3604AA | 27972 | SRR1966363 | 2014 | 7  | Europe    | United Kingdom | Enteritidis | Enteritidis | 1425 | 27264 |
| SAL_CA3605AA | 5354  | SRR1966362 | 2014 | 4  | Europe    | United Kingdom | Enteritidis | Enteritidis | 1425 | 27263 |
| SAL_CA3606AA | 63903 | SRR1966361 | 2014 | 11 | Europe    | United Kingdom | Enteritidis | Enteritidis | 1425 | 27262 |
| SAL_CA3607AA | 46574 | SRR1966360 | 2014 | 7  | Europe    | United Kingdom | Enteritidis | Enteritidis | 1425 | 27261 |
| SAL_CA3611AA | 41994 | SRR1966356 | 2014 | 8  | Europe    | United Kingdom | Enteritidis | Enteritidis | 1425 | 27257 |
| SAL_CA3614AA | 57138 | SRR1966353 | 2014 | 10 | Europe    | United Kingdom | Enteritidis | Enteritidis | 1425 | 27254 |
| SAL_CA3615AA | 38423 | SRR1966352 | 2014 | 8  | Europe    | United Kingdom | Enteritidis | Enteritidis | 3888 | 27253 |
| SAL_CA3616AA | 5355  | SRR1966351 | 2014 | 4  | 2 Europe  | United Kingdom | Enteritidis | Enteritidis | 3888 | 7317  |
| SAL_CA3618AA | 36521 | SRR1966349 | 2014 | 7  | 24 Europe | United Kingdom | Enteritidis | Enteritidis | 3888 | 7612  |
| SAL_CA3622AA | 57113 | SRR1966345 | 2014 | 8  | 5 Europe  | United Kingdom | Enteritidis | Enteritidis | 3888 | 27248 |
| SAL_CA3623AA | 39513 | SRR1966344 | 2014 | 8  | Europe    | United Kingdom | Enteritidis | Enteritidis | 1425 | 27247 |
| SAL_CA3627AA | 57163 | SRR1966340 | 2014 | 10 | Europe    | United Kingdom | Enteritidis | Enteritidis | 1425 | 27243 |
| SAL_CA3628AA | 34178 | SRR1966339 | 2014 | 7  | 17 Europe | United Kingdom | Enteritidis | Enteritidis | 3888 | 26229 |
| SAL_CA3629AA | 12186 | SRR1966338 | 2014 | 5  | Europe    | United Kingdom | Enteritidis | Enteritidis | 1425 | 27242 |
| SAL_CA3630AA | 7392  | SRR1966337 | 2014 | 4  | Europe    | United Kingdom | Enteritidis | Enteritidis | 1425 | 27241 |
| SAL_CA3634AA | 83723 | SRR1966333 | 2015 | 1  | Europe    | United Kingdom | Enteritidis | Enteritidis | 1425 | 27237 |
| SAL_CA3635AA | 40368 | SRR1966332 | 2014 | 8  | Europe    | United Kingdom | Enteritidis | Enteritidis | 1425 | 27236 |
| SAL_CA3640AA | 62995 | SRR1966327 | 2014 | 9  | Europe    | United Kingdom | Enteritidis | Enteritidis | 3888 | 27231 |
| SAL_CA3642AA | 57152 | SRR1966325 | 2014 | 10 | Europe    | United Kingdom | Enteritidis | Enteritidis | 1425 | 27229 |
| SAL_CA3648AA | 38353 | SRR1966319 | 2014 | 8  | Europe    | United Kingdom | Enteritidis | Enteritidis | 3888 | 27223 |

|              |       |            |      |    |           |                |             |             |       |       |
|--------------|-------|------------|------|----|-----------|----------------|-------------|-------------|-------|-------|
| SAL_CA3649AA | 21763 | SRR1966318 | 2014 | 6  | Europe    | United Kingdom | Enteritidis | Enteritidis | 3888  | 7105  |
| SAL_CA3656AA | 52956 | SRR1966311 | 2014 | 9  | Europe    | United Kingdom | Enteritidis | Enteritidis | 1425  | 27218 |
| SAL_CA3658AA | 50362 | SRR1966309 | 2014 | 9  | Europe    | United Kingdom | Enteritidis | Enteritidis | 3888  | 27216 |
| SAL_CA3660AA | 40794 | SRR1966307 | 2014 | 8  | 12 Europe | United Kingdom | Enteritidis | Enteritidis | 3888  | 27214 |
| SAL_CA3667AA | 50877 | SRR1966300 | 2014 | 9  | Europe    | United Kingdom | Enteritidis | Enteritidis | 1425  | 27209 |
| SAL_CA3678AA | 32477 | SRR1966289 | 2014 | 7  | 17 Europe | United Kingdom | Enteritidis | Enteritidis | 3888  | 27198 |
| SAL_CA3679AA | 42172 | SRR1966288 | 2014 | 9  | Europe    | United Kingdom | Enteritidis | Enteritidis | 3888  | 27197 |
| SAL_CA3688AA | 29381 | SRR1966279 | 2014 | 7  | Europe    | United Kingdom | Enteritidis | Enteritidis | 1425  | 27188 |
| SAL_CA3690AA | 37003 | SRR1966277 | 2014 | 8  | Europe    | United Kingdom | Enteritidis | Enteritidis | 28005 | 27186 |
| SAL_CA3705AA | 93571 | SRR1966262 | 2015 | 3  | Europe    | United Kingdom | Enteritidis | Enteritidis | 1425  | 27172 |
| SAL_CA3707AA | 25221 | SRR1966260 | 2014 | 7  | Europe    | United Kingdom | Enteritidis | Enteritidis | 1425  | 27170 |
| SAL_CA3709AA | 37108 | SRR1966258 | 2014 | 8  | Europe    | United Kingdom | Enteritidis | Enteritidis | 1425  | 27169 |
| SAL_CA3715AA | 34187 | SRR1966252 | 2014 | 7  | 25 Europe | United Kingdom | Enteritidis | Enteritidis | 3888  | 27163 |
| SAL_CA3726AA | 56152 | SRR1966241 | 2014 | 9  | Europe    | United Kingdom | Enteritidis | Enteritidis | 1425  | 27152 |
| SAL_CA3727AA | 31980 | SRR1966240 | 2014 | 7  | 25 Europe | United Kingdom | Enteritidis | Enteritidis | 3888  | 2066  |
| SAL_CA3731AA | 36532 | SRR1966236 | 2014 | 8  | Europe    | United Kingdom | Enteritidis | Enteritidis | 1425  | 27148 |
| SAL_CA3734AA | 65403 | SRR1966233 | 2014 | 10 | Europe    | United Kingdom | Enteritidis | Enteritidis | 3888  | 27145 |
| SAL_CA3738AA | 80605 | SRR1966229 | 2015 | 1  | Europe    | United Kingdom | Enteritidis | Enteritidis | 1425  | 27141 |
| SAL_CA3742AA | 46580 | SRR1966225 | 2014 | 7  | 17 Europe | United Kingdom | Enteritidis | Enteritidis | 3888  | 27137 |
| SAL_CA3744AA | 38308 | SRR1966223 | 2014 | 8  | Europe    | United Kingdom | Enteritidis | Enteritidis | 1425  | 27135 |
| SAL_CA3748AA | 56147 | SRR1966219 | 2014 | 9  | Europe    | United Kingdom | Enteritidis | Enteritidis | 1425  | 27131 |
| SAL_CA3751AA | 26633 | SRR1966216 | 2014 | 7  | Europe    | United Kingdom | Enteritidis | Enteritidis | 1425  | 27128 |
| SAL_CA3752AA | 50865 | SRR1966215 | 2014 | 9  | Europe    | United Kingdom | Enteritidis | Enteritidis | 1425  | 27127 |
| SAL_CA3757AA | 69947 | SRR1966210 | 2014 | 11 | Europe    | United Kingdom | Enteritidis | Enteritidis | 1425  | 27123 |
| SAL_CA3759AA | 85697 | SRR1966208 | 2014 | 8  | Europe    | United Kingdom | Enteritidis | Enteritidis | 1425  | 27121 |
| SAL_CA3761AA | 9464  | SRR1966205 | 2014 | 4  | 29 Europe | United Kingdom | Enteritidis | Enteritidis | 1425  | 27119 |
| SAL_CA3766AA | 83704 | SRR1966200 | 2015 | 1  | Europe    | United Kingdom | Enteritidis | Enteritidis | 1425  | 27114 |
| SAL_CA3767AA | 13860 | SRR1966199 | 2014 | 5  | Europe    | United Kingdom | Enteritidis | Enteritidis | 1425  | 27113 |
| SAL_CA3771AA | 9286  | SRR1966195 | 2014 | 5  | 1 Europe  | United Kingdom | Enteritidis | Enteritidis | 3888  | 27109 |
| SAL_CA3772AA | 39453 | SRR1966194 | 2014 | 7  | 29 Europe | United Kingdom | Enteritidis | Enteritidis | 3888  | 27108 |
| SAL_CA3773AA | 63917 | SRR1966193 | 2014 | 11 | Europe    | United Kingdom | Enteritidis | Enteritidis | 1425  | 27107 |
| SAL_CA3783AA | 12117 | SRR1966183 | 2014 | 5  | Europe    | United Kingdom | Enteritidis | Enteritidis | 1425  | 27100 |
| SAL_CA3787AA | 63714 | SRR1966179 | 2014 | 10 | Europe    | United Kingdom | Enteritidis | Enteritidis | 1425  | 25107 |
| SAL_CA3791AA | 94096 | SRR1966175 | 2015 | 3  | Europe    | United Kingdom | Enteritidis | Enteritidis | 1425  | 27094 |
| SAL_CA3794AA | 27039 | SRR1966171 | 2014 | 7  | Europe    | United Kingdom | Enteritidis | Enteritidis | 3888  | 27091 |
| SAL_CA3798AA | 51278 | SRR1966167 | 2014 | 9  | Europe    | United Kingdom | Enteritidis | Enteritidis | 3888  | 27088 |
| SAL_CA3801AA | 27031 | SRR1966164 | 2014 | 7  | Europe    | United Kingdom | Enteritidis | Enteritidis | 1425  | 26210 |
| SAL_CA3809AA | 85735 | SRR1966156 | 2015 | 2  | Europe    | United Kingdom | Enteritidis | Enteritidis | 1425  | 27079 |
| SAL_CA3814AA | 31967 | SRR1966151 | 2014 | 7  | 26 Europe | United Kingdom | Enteritidis | Enteritidis | 3888  | 2066  |
| SAL_CA3817AA | 53105 | SRR1966148 | 2014 | 9  | Europe    | United Kingdom | Enteritidis | Enteritidis | 1425  | 25062 |
| SAL_CA3831AA | 52965 | SRR1966134 | 2014 | 10 | Europe    | United Kingdom | Enteritidis | Enteritidis | 1425  | 27062 |
| SAL_CA3832AA | 52963 | SRR1966133 | 2014 | 10 | Europe    | United Kingdom | Enteritidis | Enteritidis | 1425  | 27061 |
| SAL_CA3836AA | 37831 | SRR1966129 | 2014 | 7  | 30 Europe | United Kingdom | Enteritidis | Enteritidis | 3888  | 27057 |
| SAL_CA3842AA | 25188 | SRR1966123 | 2014 | 7  | Europe    | United Kingdom | Enteritidis | Enteritidis | 3888  | 27051 |
| SAL_CA3845AA | 36502 | SRR1966120 | 2014 | 7  | Europe    | United Kingdom | Enteritidis | Enteritidis | 1425  | 6886  |
| SAL_CA3860AA | 31973 | SRR1966105 | 2014 | 7  | 22 Europe | United Kingdom | Enteritidis | Enteritidis | 3888  | 27036 |
| SAL_CA3862AA | 25260 | SRR1966102 | 2014 | 7  | 7 Europe  | United Kingdom | Enteritidis | Enteritidis | 3888  | 27034 |
| SAL_CA3876AA | 31650 | SRR1966088 | 2014 | 7  | Europe    | United Kingdom | Enteritidis | Enteritidis | 1425  | 27021 |
| SAL_CA3877AA | 32462 | SRR1966087 | 2014 | 7  | 15 Europe | United Kingdom | Enteritidis | Enteritidis | 3888  | 27020 |
| SAL_CA3880AA | 14875 | SRR1966084 | 2014 | 5  | 20 Europe | United Kingdom | Enteritidis | Enteritidis | 1425  | 27017 |
| SAL_CA3881AA | 38407 | SRR1966083 | 2014 | 8  | Europe    | United Kingdom | Enteritidis | Enteritidis | 26142 | 27016 |
| SAL_CA3886AA | 50867 | SRR1966078 | 2014 | 9  | Europe    | United Kingdom | Enteritidis | Enteritidis | 3888  | 27012 |
| SAL_CA3887AA | 36504 | SRR1966077 | 2014 | 7  | 23 Europe | United Kingdom | Enteritidis | Enteritidis | 3888  | 27011 |
| SAL_CA3888AA | 37835 | SRR1966076 | 2014 | 7  | 28 Europe | United Kingdom | Enteritidis | Enteritidis | 3888  | 27010 |
| SAL_CA3890AA | 65383 | SRR1966074 | 2014 | 10 | Europe    | United Kingdom | Enteritidis | Enteritidis | 1425  | 27008 |
| SAL_CA3893AA | 25224 | SRR1966071 | 2014 | 7  | Europe    | United Kingdom | Enteritidis | Enteritidis | 3888  | 27005 |
| SAL_CA3895AA | 45558 | SRR1966069 | 2014 | 9  | Europe    | United Kingdom | Enteritidis | Enteritidis | 1425  | 27003 |
| SAL_CA3899AA | 85696 | SRR1966065 | 2014 | 8  | Europe    | United Kingdom | Enteritidis | Enteritidis | 1425  | 27000 |
| SAL_CA3900AA | 60143 | SRR1966064 | 2014 | 10 | Europe    | United Kingdom | Enteritidis | Enteritidis | 1425  | 26999 |

|              |       |            |      |    |           |                |             |             |       |       |
|--------------|-------|------------|------|----|-----------|----------------|-------------|-------------|-------|-------|
| SAL_CA3901AA | 38778 | SRR1966063 | 2014 | 8  | Europe    | United Kingdom | Enteritidis | Enteritidis | 1425  | 26998 |
| SAL_CA3912AA | 96975 | SRR1966052 | 2015 | 3  | Europe    | United Kingdom | Enteritidis | Enteritidis | 3888  | 26987 |
| SAL_CA3928AA | 27004 | SRR1966035 | 2014 | 7  | Europe    | United Kingdom | Enteritidis | Enteritidis | 3888  | 25821 |
| SAL_CA3930AA | 56142 | SRR1966033 | 2014 | 9  | Europe    | United Kingdom | Enteritidis | Enteritidis | 1425  | 20758 |
| SAL_CA3932AA | 46014 | SRR1966031 | 2014 | 8  | Europe    | United Kingdom | Enteritidis | Enteritidis | 1425  | 26972 |
| SAL_CA3934AA | 26644 | SRR1966029 | 2014 | 6  | 30 Europe | United Kingdom | Enteritidis | Enteritidis | 3888  | 26971 |
| SAL_CA3941AA | 52953 | SRR1966022 | 2014 | 9  | Europe    | United Kingdom | Enteritidis | Enteritidis | 3888  | 26964 |
| SAL_CA3942AA | 94260 | SRR1966021 | 2015 | 3  | Europe    | United Kingdom | Enteritidis | Enteritidis | 1425  | 2163  |
| SAL_CA3943AA | 39486 | SRR1966020 | 2014 | 8  | 4 Europe  | United Kingdom | Enteritidis | Enteritidis | 3888  | 26963 |
| SAL_CA3947AA | 40780 | SRR1966016 | 2014 | 8  | Europe    | United Kingdom | Enteritidis | Enteritidis | 3888  | 26960 |
| SAL_CA3955AA | 37112 | SRR1966003 | 2014 | 8  | Europe    | United Kingdom | Enteritidis | Enteritidis | 1425  | 26952 |
| SAL_CA3956AA | 23500 | SRR1966002 | 2014 | 6  | 17 Europe | United Kingdom | Enteritidis | Enteritidis | 3888  | 26951 |
| SAL_CA3971AA | 31976 | SRR1965987 | 2014 | 7  | 23 Europe | United Kingdom | Enteritidis | Enteritidis | 3888  | 26936 |
| SAL_CA3973AA | 27059 | SRR1965985 | 2014 | 7  | Europe    | United Kingdom | Enteritidis | Enteritidis | 1425  | 26934 |
| SAL_CA3974AA | 39512 | SRR1965984 | 2014 | 8  | Europe    | United Kingdom | Enteritidis | Enteritidis | 1425  | 26933 |
| SAL_CA3976AA | 9262  | SRR1965982 | 2014 | 4  | Europe    | United Kingdom | Enteritidis | Enteritidis | 1425  | 26931 |
| SAL_CA3978AA | 37837 | SRR1965980 | 2014 | 8  | Europe    | United Kingdom | Enteritidis | Enteritidis | 1425  | 26929 |
| SAL_CA3983AA | 24055 | SRR1965975 | 2014 | 6  | Europe    | United Kingdom | Enteritidis | Enteritidis | 1425  | 26924 |
| SAL_CA3984AA | 24041 | SRR1965974 | 2014 | 6  | Europe    | United Kingdom | Enteritidis | Enteritidis | 3888  | 26923 |
| SAL_CA3985AA | 14129 | SRR1965973 | 2014 | 5  | Europe    | United Kingdom | Enteritidis | Enteritidis | 3888  | 26922 |
| SAL_CA3989AA | 65436 | SRR1965969 | 2014 | 10 | Europe    | United Kingdom | Enteritidis | Enteritidis | 1425  | 26918 |
| SAL_CA3995AA | 83318 | SRR1965963 | 2015 | 1  | 21 Europe | United Kingdom | Enteritidis | Enteritidis | 1425  | 26913 |
| SAL_CA3998AA | 31649 | SRR1965960 | 2014 | 7  | Europe    | United Kingdom | Enteritidis | Enteritidis | 1425  | 26210 |
| SAL_CA4000AA | 34176 | SRR1965958 | 2014 | 7  | 21 Europe | United Kingdom | Enteritidis | Enteritidis | 3888  | 26909 |
| SAL_CA4010AA | 9245  | SRR1965948 | 2014 | 4  | 23 Europe | United Kingdom | Enteritidis | Enteritidis | 1425  | 26899 |
| SAL_CA4020AA | 96239 | SRR1965938 | 2015 | 3  | 16 Europe | United Kingdom | Enteritidis | Enteritidis | 1425  | 26890 |
| SAL_CA4022AA | 73213 | SRR1965936 | 2014 | 12 | Europe    | United Kingdom | Enteritidis | Enteritidis | 28459 | 26888 |
| SAL_CA4026AA | 39441 | SRR1965932 | 2014 | 7  | Europe    | United Kingdom | Enteritidis | Enteritidis | 1425  | 26884 |
| SAL_CA4033AA | 90473 | SRR1965924 | 2015 | 2  | Europe    | United Kingdom | Enteritidis | Enteritidis | 1425  | 26878 |
| SAL_CA4040AA | 63682 | SRR1965917 | 2014 | 10 | Europe    | United Kingdom | Enteritidis | Enteritidis | 3888  | 26872 |
| SAL_CA4043AA | 38339 | SRR1965914 | 2014 | 8  | Europe    | United Kingdom | Enteritidis | Enteritidis | 1425  | 26869 |
| SAL_CA4045AA | 68692 | SRR1965912 | 2014 | 11 | 12 Europe | United Kingdom | Enteritidis | Enteritidis | 27885 | 26868 |
| SAL_CA4051AA | 3907  | SRR1965906 | 2014 | 4  | Europe    | United Kingdom | Enteritidis | Enteritidis | 1425  | 26863 |
| SAL_CA4053AA | 51283 | SRR1965904 | 2014 | 9  | Europe    | United Kingdom | Enteritidis | Enteritidis | 1425  | 24766 |
| SAL_CA4057AA | 40792 | SRR1965900 | 2014 | 8  | Europe    | United Kingdom | Enteritidis | Enteritidis | 1425  | 26860 |
| SAL_CA4061AA | 31969 | SRR1965895 | 2014 | 7  | 25 Europe | United Kingdom | Enteritidis | Enteritidis | 3888  | 26858 |
| SAL_CA4065AA | 46576 | SRR1965891 | 2014 | 7  | Europe    | United Kingdom | Enteritidis | Enteritidis | 1425  | 26854 |
| SAL_CA4069AA | 12184 | SRR1965887 | 2014 | 5  | Europe    | United Kingdom | Enteritidis | Enteritidis | 1425  | 26851 |
| SAL_CA4072AA | 65369 | SRR1965884 | 2014 | 10 | Europe    | United Kingdom | Enteritidis | Enteritidis | 1425  | 26848 |
| SAL_CA4073AA | 83320 | SRR1965883 | 2015 | 1  | Europe    | United Kingdom | Enteritidis | Enteritidis | 1425  | 26847 |
| SAL_CA4074AA | 13372 | SRR1965882 | 2014 | 4  | Europe    | United Kingdom | Enteritidis | Enteritidis | 1425  | 26846 |
| SAL_CA4077AA | 91893 | SRR1965879 | 2014 | 8  | 1 Europe  | United Kingdom | Enteritidis | Enteritidis | 3888  | 26844 |
| SAL_CA4079AA | 52976 | SRR1965877 | 2014 | 10 | Europe    | United Kingdom | Enteritidis | Enteritidis | 28454 | 26842 |
| SAL_CA4080AA | 63640 | SRR1965876 | 2014 | 10 | Europe    | United Kingdom | Enteritidis | Enteritidis | 1425  | 26841 |
| SAL_CA4081AA | 34158 | SRR1965875 | 2014 | 7  | Europe    | United Kingdom | Enteritidis | Enteritidis | 3888  | 26840 |
| SAL_CA4084AA | 63937 | SRR1965872 | 2014 | 11 | Europe    | United Kingdom | Enteritidis | Enteritidis | 1425  | 25223 |
| SAL_CA4088AA | 31952 | SRR1965867 | 2014 | 7  | 24 Europe | United Kingdom | Enteritidis | Enteritidis | 3888  | 512   |
| SAL_CA4089AA | 95044 | SRR1965866 | 2015 | 3  | Europe    | United Kingdom | Enteritidis | Enteritidis | 1425  | 26835 |
| SAL_CA4095AA | 38338 | SRR1965860 | 2014 | 8  | Europe    | United Kingdom | Enteritidis | Enteritidis | 1425  | 26830 |
| SAL_CA4106AA | 38350 | SRR1965849 | 2014 | 8  | Europe    | United Kingdom | Enteritidis | Enteritidis | 1425  | 26819 |
| SAL_CA4107AA | 63664 | SRR1965848 | 2014 | 10 | Europe    | United Kingdom | Enteritidis | Enteritidis | 1425  | 26818 |
| SAL_CA4113AA | 72310 | SRR1965842 | 2014 | 11 | Europe    | United Kingdom | Enteritidis | Enteritidis | 3888  | 26812 |
| SAL_CA4124AA | 39481 | SRR1965831 | 2014 | 8  | Europe    | United Kingdom | Enteritidis | Enteritidis | 1425  | 26802 |
| SAL_CA4125AA | 3745  | SRR1965830 | 2014 | 4  | Europe    | United Kingdom | Enteritidis | Enteritidis | 1425  | 7257  |
| SAL_CA4130AA | 45577 | SRR1965824 | 2014 | 9  | Europe    | United Kingdom | Enteritidis | Enteritidis | 1425  | 6917  |
| SAL_CA4132AA | 93530 | SRR1965822 | 2015 | 3  | Europe    | United Kingdom | Enteritidis | Enteritidis | 1425  | 26796 |
| SAL_CA4141AA | 61870 | SRR1965813 | 2014 | 10 | Europe    | United Kingdom | Enteritidis | Enteritidis | 1425  | 24829 |
| SAL_CA4151AA | 37808 | SRR1965800 | 2014 | 7  | 31 Europe | United Kingdom | Enteritidis | Enteritidis | 3888  | 7612  |
| SAL_CA4152AA | 69918 | SRR1965799 | 2014 | 11 | Europe    | United Kingdom | Enteritidis | Enteritidis | 1425  | 26780 |

|              |       |            |      |    |           |                |             |             |       |       |
|--------------|-------|------------|------|----|-----------|----------------|-------------|-------------|-------|-------|
| SAL_CA4155AA | 13429 | SRR1965796 | 2014 | 5  | Europe    | United Kingdom | Enteritidis | Enteritidis | 1425  | 26777 |
| SAL_CA4157AA | 14868 | SRR1965794 | 2014 | 5  | Europe    | United Kingdom | Enteritidis | Enteritidis | 3888  | 26776 |
| SAL_CA4158AA | 13358 | SRR1965792 | 2014 | 4  | Europe    | United Kingdom | Enteritidis | Enteritidis | 3888  | 26775 |
| SAL_CA4160AA | 25230 | SRR1965790 | 2014 | 7  | Europe    | United Kingdom | Enteritidis | Enteritidis | 1425  | 26773 |
| SAL_CA4165AA | 57112 | SRR1965784 | 2014 | 8  | 1 Europe  | United Kingdom | Enteritidis | Enteritidis | 3888  | 26768 |
| SAL_CA4168AA | 53007 | SRR1965781 | 2014 | 10 | 1 Europe  | United Kingdom | Enteritidis | Enteritidis | 1425  | 26765 |
| SAL_CA4170AA | 27036 | SRR1965779 | 2014 | 7  | Europe    | United Kingdom | Enteritidis | Enteritidis | 1425  | 26763 |
| SAL_CA4172AA | 57155 | SRR1965776 | 2014 | 10 | Europe    | United Kingdom | Enteritidis | Enteritidis | 3888  | 26761 |
| SAL_CA4174AA | 65379 | SRR1965774 | 2014 | 9  | 29 Europe | United Kingdom | Enteritidis | Enteritidis | 3888  | 26759 |
| SAL_CA4175AA | 25002 | SRR1965773 | 2014 | 7  | Europe    | United Kingdom | Enteritidis | Enteritidis | 1425  | 26758 |
| SAL_CA4176AA | 36522 | SRR1965772 | 2014 | 7  | 23 Europe | United Kingdom | Enteritidis | Enteritidis | 3888  | 26757 |
| SAL_CA4181AA | 24037 | SRR1965767 | 2014 | 6  | Europe    | United Kingdom | Enteritidis | Enteritidis | 1425  | 26752 |
| SAL_CA4187AA | 34140 | SRR1965760 | 2014 | 7  | Europe    | United Kingdom | Enteritidis | Enteritidis | 1425  | 26746 |
| SAL_CA4189AA | 63728 | SRR1965758 | 2014 | 10 | Europe    | United Kingdom | Enteritidis | Enteritidis | 3888  | 26744 |
| SAL_CA4192AA | 75938 | SRR1965755 | 2014 | 12 | Europe    | United Kingdom | Enteritidis | Enteritidis | 1425  | 26741 |
| SAL_CA4194AA | 46009 | SRR1965753 | 2014 | 8  | 9 Europe  | United Kingdom | Enteritidis | Enteritidis | 3888  | 25112 |
| SAL_CA4200AA | 14507 | SRR1965746 | 2014 | 5  | Europe    | United Kingdom | Enteritidis | Enteritidis | 1425  | 26736 |
| SAL_CA4203AA | 40269 | SRR1965742 | 2014 | 8  | 9 Europe  | United Kingdom | Enteritidis | Enteritidis | 3888  | 26733 |
| SAL_CA4206AA | 22230 | SRR1965739 | 2014 | 6  | Europe    | United Kingdom | Enteritidis | Enteritidis | 3888  | 26730 |
| SAL_CA4207AA | 25345 | SRR1965738 | 2014 | 7  | Europe    | United Kingdom | Enteritidis | Enteritidis | 3888  | 26729 |
| SAL_CA4209AA | 65449 | SRR1965735 | 2014 | 8  | 1 Europe  | United Kingdom | Enteritidis | Enteritidis | 3888  | 26727 |
| SAL_CA4213AA | 37062 | SRR1965730 | 2014 | 8  | 6 Europe  | United Kingdom | Enteritidis | Enteritidis | 3888  | 26723 |
| SAL_CA4214AA | 68636 | SRR1965729 | 2014 | 10 | 13 Europe | United Kingdom | Enteritidis | Enteritidis | 3888  | 7317  |
| SAL_CA4217AA | 63757 | SRR1965726 | 2014 | 10 | Europe    | United Kingdom | Enteritidis | Enteritidis | 3888  | 26720 |
| SAL_CA4228AA | 67566 | SRR1965713 | 2014 | 11 | 11 Europe | United Kingdom | Enteritidis | Enteritidis | 1425  | 26712 |
| SAL_CA4232AA | 98286 | SRR1965709 | 2015 | 3  | Europe    | United Kingdom | Enteritidis | Enteritidis | 1425  | 26709 |
| SAL_CA4237AA | 72325 | SRR1965703 | 2014 | 11 | Europe    | United Kingdom | Enteritidis | Enteritidis | 1425  | 7784  |
| SAL_CA4240AA | 37828 | SRR1965700 | 2014 | 7  | 28 Europe | United Kingdom | Enteritidis | Enteritidis | 3888  | 26702 |
| SAL_CA4244AA | 85726 | SRR1965695 | 2015 | 2  | Europe    | United Kingdom | Enteritidis | Enteritidis | 1425  | 26699 |
| SAL_CA4247AA | 38425 | SRR1965692 | 2014 | 7  | 29 Europe | United Kingdom | Enteritidis | Enteritidis | 3888  | 26696 |
| SAL_CA4255AA | 83342 | SRR1965683 | 2015 | 1  | Europe    | United Kingdom | Enteritidis | Enteritidis | 1425  | 26689 |
| SAL_CA4257AA | 65372 | SRR1965681 | 2014 | 10 | Europe    | United Kingdom | Enteritidis | Enteritidis | 1425  | 21622 |
| SAL_CA4259AA | 31929 | SRR1965679 | 2014 | 7  | 21 Europe | United Kingdom | Enteritidis | Enteritidis | 3888  | 26685 |
| SAL_CA4266AA | 63901 | SRR1965671 | 2014 | 11 | Europe    | United Kingdom | Enteritidis | Enteritidis | 26481 | 25998 |
| SAL_CA4268AA | 36506 | SRR1965669 | 2014 | 7  | 24 Europe | United Kingdom | Enteritidis | Enteritidis | 3888  | 26678 |
| SAL_CA4279AA | 93570 | SRR1965657 | 2015 | 3  | Europe    | United Kingdom | Enteritidis | Enteritidis | 1425  | 6917  |
| SAL_CA4285AA | 94083 | SRR1965651 | 2015 | 3  | Europe    | United Kingdom | Enteritidis | Enteritidis | 1425  | 26662 |
| SAL_CA4299AA | 99068 | SRR1965636 | 2015 | 3  | 27 Europe | United Kingdom | Enteritidis | Enteritidis | 1425  | 25745 |
| SAL_CA4312AA | 38421 | SRR1965623 | 2014 | 7  | 29 Europe | United Kingdom | Enteritidis | Enteritidis | 3888  | 26639 |
| SAL_CA4315AA | 42160 | SRR1965620 | 2014 | 9  | Europe    | United Kingdom | Enteritidis | Enteritidis | 1425  | 26636 |
| SAL_CA4316AA | 85728 | SRR1965619 | 2015 | 2  | Europe    | United Kingdom | Enteritidis | Enteritidis | 1425  | 26635 |
| SAL_CA4317AA | 36473 | SRR1965618 | 2014 | 7  | 21 Europe | United Kingdom | Enteritidis | Enteritidis | 3888  | 26634 |
| SAL_CA4319AA | 27061 | SRR1965616 | 2014 | 7  | Europe    | United Kingdom | Enteritidis | Enteritidis | 1425  | 26632 |
| SAL_CA4320AA | 38320 | SRR1965615 | 2014 | 8  | Europe    | United Kingdom | Enteritidis | Enteritidis | 1425  | 26631 |
| SAL_CA4322AA | 63598 | SRR1965613 | 2014 | 10 | Europe    | United Kingdom | Enteritidis | Enteritidis | 1425  | 24547 |
| SAL_CA4326AA | 9283  | SRR1965609 | 2014 | 5  | Europe    | United Kingdom | Enteritidis | Enteritidis | 1425  | 26627 |
| SAL_CA4329AA | 83343 | SRR1965606 | 2015 | 1  | Europe    | United Kingdom | Enteritidis | Enteritidis | 1425  | 6917  |
| SAL_CA4332AA | 45557 | SRR1965603 | 2014 | 9  | Europe    | United Kingdom | Enteritidis | Enteritidis | 1425  | 26622 |
| SAL_CA4336AA | 90471 | SRR1965599 | 2015 | 2  | Europe    | United Kingdom | Enteritidis | Enteritidis | 1425  | 26618 |
| SAL_CA4339AA | 38426 | SRR1965596 | 2014 | 7  | 28 Europe | United Kingdom | Enteritidis | Enteritidis | 3888  | 26616 |
| SAL_CA4340AA | 32519 | SRR1965594 | 2014 | 7  | Europe    | United Kingdom | Enteritidis | Enteritidis | 3888  | 26615 |
| SAL_CA4343AA | 38766 | SRR1965590 | 2014 | 8  | 5 Europe  | United Kingdom | Enteritidis | Enteritidis | 3888  | 2066  |
| SAL_CA4351AA | 50351 | SRR1965581 | 2014 | 9  | Europe    | United Kingdom | Enteritidis | Enteritidis | 1425  | 26606 |
| SAL_CA4352AA | 21787 | SRR1965580 | 2014 | 6  | Europe    | United Kingdom | Enteritidis | Enteritidis | 1425  | 26605 |
| SAL_CA4354AA | 98254 | SRR1965578 | 2015 | 3  | Europe    | United Kingdom | Enteritidis | Enteritidis | 1425  | 2277  |
| SAL_CA4355AA | 93532 | SRR1965577 | 2015 | 3  | Europe    | United Kingdom | Enteritidis | Enteritidis | 3888  | 26603 |
| SAL_CA4359AA | 27974 | SRR1965565 | 2014 | 7  | Europe    | United Kingdom | Enteritidis | Enteritidis | 1425  | 26599 |
| SAL_CA4360AA | 29392 | SRR1965564 | 2014 | 7  | Europe    | United Kingdom | Enteritidis | Enteritidis | 3888  | 26598 |
| SAL_CA4361AA | 31977 | SRR1965563 | 2014 | 4  | 22 Europe | United Kingdom | Enteritidis | Enteritidis | 3888  | 514   |

|              |       |            |      |    |    |        |                |             |             |       |       |
|--------------|-------|------------|------|----|----|--------|----------------|-------------|-------------|-------|-------|
| SAL_CA4375AA | 21777 | SRR1965549 | 2014 | 6  | 12 | Europe | United Kingdom | Enteritidis | Enteritidis | 3888  | 26585 |
| SAL_CA4377AA | 75975 | SRR1965547 | 2014 | 12 |    | Europe | United Kingdom | Enteritidis | Enteritidis | 1425  | 26583 |
| SAL_CA4381AA | 12159 | SRR1965543 | 2014 | 5  |    | Europe | United Kingdom | Enteritidis | Enteritidis | -1662 | 26580 |
| SAL_CA4383AA | 83287 | SRR1965541 | 2015 | 1  |    | Europe | United Kingdom | Enteritidis | Enteritidis | 1425  | 26578 |
| SAL_CA4386AA | 75954 | SRR1965538 | 2014 | 12 |    | Europe | United Kingdom | Enteritidis | Enteritidis | 1425  | 26575 |
| SAL_CA4391AA | 37819 | SRR1965533 | 2014 | 7  | 29 | Europe | United Kingdom | Enteritidis | Enteritidis | 3888  | 2066  |
| SAL_CA4394AA | 37778 | SRR1965530 | 2014 | 8  | 1  | Europe | United Kingdom | Enteritidis | Enteritidis | 3888  | 7612  |
| SAL_CA4395AA | 23495 | SRR1965529 | 2014 | 6  |    | Europe | United Kingdom | Enteritidis | Enteritidis | 3888  | 26568 |
| SAL_CA4397AA | 23079 | SRR1965527 | 2014 | 6  |    | Europe | United Kingdom | Enteritidis | Enteritidis | 1425  | 26566 |
| SAL_CA4398AA | 69951 | SRR1965526 | 2014 | 11 |    | Europe | United Kingdom | Enteritidis | Enteritidis | 1425  | 26565 |
| SAL_CA4399AA | 61851 | SRR1965525 | 2014 | 10 |    | Europe | United Kingdom | Enteritidis | Enteritidis | 1425  | 25842 |
| SAL_CA4402AA | 25321 | SRR1965522 | 2014 | 6  |    | Europe | United Kingdom | Enteritidis | Enteritidis | 3888  | 26562 |
| SAL_CA4404AA | 68970 | SRR1965520 | 2014 | 11 |    | Europe | United Kingdom | Enteritidis | Enteritidis | 1425  | 25432 |
| SAL_CA4408AA | 91295 | SRR1965515 | 2015 | 2  |    | Europe | United Kingdom | Enteritidis | Enteritidis | 1425  | 26558 |
| SAL_CA4409AA | 25329 | SRR1965514 | 2014 | 7  |    | Europe | United Kingdom | Enteritidis | Enteritidis | 3888  | 26557 |
| SAL_CA4417AA | 37832 | SRR1965506 | 2014 | 7  | 31 | Europe | United Kingdom | Enteritidis | Enteritidis | 3888  | 26550 |
| SAL_CA4418AA | 32468 | SRR1965505 | 2014 | 7  |    | Europe | United Kingdom | Enteritidis | Enteritidis | 1425  | 26549 |
| SAL_CA4420AA | 46010 | SRR1965503 | 2014 | 8  |    | Europe | United Kingdom | Enteritidis | Enteritidis | 1425  | 26435 |
| SAL_CA4427AA | 38309 | SRR1965496 | 2014 | 7  | 28 | Europe | United Kingdom | Enteritidis | Enteritidis | 3888  | 26542 |
| SAL_CA4431AA | 41987 | SRR1965492 | 2014 | 8  | 27 | Europe | United Kingdom | Enteritidis | Enteritidis | 1425  | 26538 |
| SAL_CA4433AA | 37109 | SRR1965488 | 2014 | 8  |    | Europe | United Kingdom | Enteritidis | Enteritidis | 1425  | 26536 |
| SAL_CA4435AA | 27001 | SRR1965486 | 2014 | 6  |    | Europe | United Kingdom | Enteritidis | Enteritidis | 3888  | 26534 |
| SAL_CA4437AA | 43431 | SRR1965484 | 2014 | 8  | 29 | Europe | United Kingdom | Enteritidis | Enteritidis | 3888  | 26532 |
| SAL_CA4438AA | 24053 | SRR1965483 | 2014 | 6  | 19 | Europe | United Kingdom | Enteritidis | Enteritidis | 3888  | 26531 |
| SAL_CA4440AA | 14130 | SRR1965481 | 2014 | 5  |    | Europe | United Kingdom | Enteritidis | Enteritidis | 1425  | 26529 |
| SAL_CA4448AA | 50890 | SRR1965473 | 2014 | 9  |    | Europe | United Kingdom | Hillingdon  | Enteritidis | 1425  | 7550  |
| SAL_CA4450AA | 60148 | SRR1965471 | 2014 | 10 |    | Europe | United Kingdom | Enteritidis | Enteritidis | 1425  | 26521 |
| SAL_CA4457AA | 38311 | SRR1965464 | 2014 | 7  | 29 | Europe | United Kingdom | Enteritidis | Enteritidis | 3888  | 26516 |
| SAL_CA4458AA | 85757 | SRR1965463 | 2015 | 2  |    | Europe | United Kingdom | Enteritidis | Enteritidis | 1425  | 26515 |
| SAL_CA4462AA | 38418 | SRR1965458 | 2014 | 7  | 30 | Europe | United Kingdom | Enteritidis | Enteritidis | 3888  | 26511 |
| SAL_CA4463AA | 68653 | SRR1965457 | 2014 | 11 |    | Europe | United Kingdom | Enteritidis | Enteritidis | 1425  | 26283 |
| SAL_CA4464AA | 13803 | SRR1965456 | 2014 | 4  |    | Europe | United Kingdom | Enteritidis | Enteritidis | 1425  | 26510 |
| SAL_CA4466AA | 50874 | SRR1965454 | 2014 | 9  |    | Europe | United Kingdom | Enteritidis | Enteritidis | 1425  | 26508 |
| SAL_CA4476AA | 40327 | SRR1965444 | 2014 | 8  | 18 | Europe | United Kingdom | Enteritidis | Enteritidis | 3888  | 26498 |
| SAL_CA4481AA | 27000 | SRR1965439 | 2014 | 6  |    | Europe | United Kingdom | Enteritidis | Enteritidis | 1425  | 7007  |
| SAL_CA4488AA | 56120 | SRR1965432 | 2014 | 9  |    | Europe | United Kingdom | Enteritidis | Enteritidis | 1425  | 26358 |
| SAL_CA4496AA | 37823 | SRR1965424 | 2014 | 7  | 30 | Europe | United Kingdom | Enteritidis | Enteritidis | 3888  | 26481 |
| SAL_CA4508AA | 68651 | SRR1965412 | 2014 | 11 |    | Europe | United Kingdom | Enteritidis | Enteritidis | 1425  | 26470 |
| SAL_CA4509AA | 65448 | SRR1965411 | 2014 | 10 | 3  | Europe | United Kingdom | Enteritidis | Enteritidis | 3888  | 26469 |
| SAL_CA4510AA | 38420 | SRR1965410 | 2014 | 7  | 29 | Europe | United Kingdom | Enteritidis | Enteritidis | 3888  | 26468 |
| SAL_CA4512AA | 39478 | SRR1965408 | 2014 | 8  |    | Europe | United Kingdom | Enteritidis | Enteritidis | 28446 | 26466 |
| SAL_CA4516AA | 13808 | SRR1965404 | 2014 | 5  |    | Europe | United Kingdom | Enteritidis | Enteritidis | 1425  | 26462 |
| SAL_CA4517AA | 63936 | SRR1965403 | 2014 | 11 |    | Europe | United Kingdom | Enteritidis | Enteritidis | 1425  | 24842 |
| SAL_CA4519AA | 50854 | SRR1965400 | 2014 | 9  |    | Europe | United Kingdom | Enteritidis | Enteritidis | 1425  | 26460 |
| SAL_CA4520AA | 96974 | SRR1965399 | 2015 | 3  |    | Europe | United Kingdom | Enteritidis | Enteritidis | 1425  | 25914 |
| SAL_CA4527AA | 27802 | SRR1965392 | 2014 | 7  |    | Europe | United Kingdom | Enteritidis | Enteritidis | 3888  | 26453 |
| SAL_CA4534AA | 57157 | SRR1965385 | 2014 | 10 |    | Europe | United Kingdom | Enteritidis | Enteritidis | 1425  | 26446 |
| SAL_CA4541AA | 56145 | SRR1965378 | 2014 | 9  |    | Europe | United Kingdom | Enteritidis | Enteritidis | 3888  | 7867  |
| SAL_CA4542AA | 94104 | SRR1965377 | 2015 | 3  |    | Europe | United Kingdom | Enteritidis | Enteritidis | 1425  | 7921  |
| SAL_CA4543AA | 12153 | SRR1965376 | 2014 | 5  |    | Europe | United Kingdom | Enteritidis | Enteritidis | 1425  | 26442 |
| SAL_CA4544AA | 32523 | SRR1965375 | 2014 | 7  | 15 | Europe | United Kingdom | Enteritidis | Enteritidis | 3888  | 7153  |
| SAL_CA4545AA | 31939 | SRR1965374 | 2014 | 7  |    | Europe | United Kingdom | Enteritidis | Enteritidis | 1425  | 25842 |
| SAL_CA4547AA | 65124 | SRR1965372 | 2014 | 11 |    | Europe | United Kingdom | Enteritidis | Enteritidis | 1425  | 26440 |
| SAL_CA4548AA | 25267 | SRR1965371 | 2014 | 7  |    | Europe | United Kingdom | Enteritidis | Enteritidis | 28443 | 26439 |
| SAL_CA4550AA | 38314 | SRR1965369 | 2014 | 7  | 29 | Europe | United Kingdom | Enteritidis | Enteritidis | 3888  | 26438 |
| SAL_CA4553AA | 52949 | SRR1965366 | 2014 | 10 |    | Europe | United Kingdom | Enteritidis | Enteritidis | 1425  | 26435 |
| SAL_CA4559AA | 45606 | SRR1965360 | 2014 | 9  | 9  | Europe | United Kingdom | Enteritidis | Enteritidis | 1425  | 26429 |
| SAL_CA4560AA | 38361 | SRR1965359 | 2014 | 7  | 28 | Europe | United Kingdom | Enteritidis | Enteritidis | 3888  | 2066  |
| SAL_CA4566AA | 50361 | SRR1965353 | 2014 | 9  | 4  | Europe | United Kingdom | Enteritidis | Enteritidis | 3888  | 2066  |

|              |       |            |      |    |           |                |             |             |       |       |
|--------------|-------|------------|------|----|-----------|----------------|-------------|-------------|-------|-------|
| SAL_CA4568AA | 53127 | SRR1965351 | 2014 | 9  | Europe    | United Kingdom | Enteritidis | Enteritidis | 1425  | 26422 |
| SAL_CA4570AA | 93529 | SRR1965349 | 2015 | 3  | Europe    | United Kingdom | Enteritidis | Enteritidis | 28005 | 26420 |
| SAL_CA4571AA | 38352 | SRR1965348 | 2014 | 8  | Europe    | United Kingdom | Enteritidis | Enteritidis | 1425  | 26419 |
| SAL_CA4574AA | 14521 | SRR1965345 | 2014 | 5  | Europe    | United Kingdom | Enteritidis | Enteritidis | 1425  | 26417 |
| SAL_CA4575AA | 9186  | SRR1965344 | 2014 | 5  | Europe    | United Kingdom | Enteritidis | Enteritidis | 1425  | 3522  |
| SAL_CA4580AA | 37759 | SRR1965339 | 2014 | 7  | 28 Europe | United Kingdom | Enteritidis | Enteritidis | 3888  | 514   |
| SAL_CA4582AA | 13834 | SRR1965336 | 2014 | 5  | Europe    | United Kingdom | Enteritidis | Enteritidis | 26142 | 26411 |
| SAL_CA4588AA | 32527 | SRR1965330 | 2014 | 7  | 23 Europe | United Kingdom | Enteritidis | Enteritidis | 1425  | 26405 |
| SAL_CA4591AA | 52954 | SRR1965327 | 2014 | 9  | 25 Europe | United Kingdom | Enteritidis | Enteritidis | 3888  | 26402 |
| SAL_CA4593AA | 3749  | SRR1965325 | 2014 | 4  | Europe    | United Kingdom | Enteritidis | Enteritidis | 3888  | 26401 |
| SAL_CA4598AA | 99077 | SRR1965320 | 2015 | 3  | Europe    | United Kingdom | Enteritidis | Enteritidis | 1425  | 26397 |
| SAL_CA4599AA | 25183 | SRR1965319 | 2014 | 7  | Europe    | United Kingdom | Enteritidis | Enteritidis | 3888  | 26396 |
| SAL_CA4601AA | 84438 | SRR1965317 | 2015 | 2  | Europe    | United Kingdom | Enteritidis | Enteritidis | 1425  | 26394 |
| SAL_CA4605AA | 21785 | SRR1965313 | 2014 | 6  | 3 Europe  | United Kingdom | Enteritidis | Enteritidis | 3888  | 26390 |
| SAL_CA4615AA | 55571 | SRR1965303 | 2014 | 9  | Europe    | United Kingdom | Enteritidis | Enteritidis | 1425  | 26381 |
| SAL_CA4616AA | 96956 | SRR1965302 | 2015 | 3  | Europe    | United Kingdom | Enteritidis | Enteritidis | 1425  | 26380 |
| SAL_CA4628AA | 39485 | SRR1965290 | 2014 | 8  | Europe    | United Kingdom | Enteritidis | Enteritidis | 1425  | 26368 |
| SAL_CA4634AA | 38771 | SRR1965284 | 2014 | 8  | Europe    | United Kingdom | Enteritidis | Enteritidis | 1425  | 26363 |
| SAL_CA4636AA | 85724 | SRR1965282 | 2015 | 2  | Europe    | United Kingdom | Enteritidis | Enteritidis | 1425  | 26361 |
| SAL_CA4638AA | 63599 | SRR1965279 | 2014 | 10 | Europe    | United Kingdom | Enteritidis | Enteritidis | 1425  | 26359 |
| SAL_CA4639AA | 75979 | SRR1965278 | 2014 | 12 | Europe    | United Kingdom | Enteritidis | Enteritidis | 1425  | 26358 |
| SAL_CA4640AA | 63577 | SRR1965277 | 2014 | 10 | Europe    | United Kingdom | Enteritidis | Enteritidis | 1425  | 26357 |
| SAL_CA4642AA | 53110 | SRR1965275 | 2014 | 9  | 23 Europe | United Kingdom | Enteritidis | Enteritidis | 3888  | 26355 |
| SAL_CA4644AA | 65365 | SRR1965273 | 2014 | 10 | Europe    | United Kingdom | Enteritidis | Enteritidis | 1425  | 24727 |
| SAL_CA4648AA | 63871 | SRR1965269 | 2014 | 9  | Europe    | United Kingdom | Enteritidis | Enteritidis | 1425  | 26350 |
| SAL_CA4651AA | 25341 | SRR1965266 | 2014 | 6  | 25 Europe | United Kingdom | Enteritidis | Enteritidis | 3888  | 26347 |
| SAL_CA4657AA | 46008 | SRR1965260 | 2014 | 8  | Europe    | United Kingdom | Enteritidis | Enteritidis | 1425  | 26342 |
| SAL_CA4663AA | 89998 | SRR1965254 | 2015 | 2  | Europe    | United Kingdom | Enteritidis | Enteritidis | 1425  | 23956 |
| SAL_CA4664AA | 45969 | SRR1965253 | 2014 | 7  | Europe    | United Kingdom | Enteritidis | Enteritidis | 1425  | 26337 |
| SAL_CA4666AA | 39510 | SRR1965251 | 2014 | 8  | Europe    | United Kingdom | Enteritidis | Enteritidis | 1425  | 26335 |
| SAL_CA4669AA | 93567 | SRR1965248 | 2015 | 3  | Europe    | United Kingdom | Enteritidis | Enteritidis | 1425  | 26333 |
| SAL_CA4675AA | 55567 | SRR1965242 | 2014 | 9  | Europe    | United Kingdom | Enteritidis | Enteritidis | 1425  | 26329 |
| SAL_CA4680AA | 53120 | SRR1965237 | 2014 | 9  | Europe    | United Kingdom | Enteritidis | Enteritidis | 1425  | 26325 |
| SAL_CA4681AA | 56130 | SRR1965236 | 2014 | 9  | Europe    | United Kingdom | Enteritidis | Enteritidis | 1425  | 26323 |
| SAL_CA4683AA | 50349 | SRR1965234 | 2014 | 9  | Europe    | United Kingdom | Enteritidis | Enteritidis | 3888  | 26322 |
| SAL_CA4685AA | 37763 | SRR1965226 | 2014 | 8  | Europe    | United Kingdom | Enteritidis | Enteritidis | 1425  | 26319 |
| SAL_CA4688AA | 65052 | SRR1965222 | 2014 | 11 | Europe    | United Kingdom | Enteritidis | Enteritidis | 26481 | 25998 |
| SAL_CA4690AA | 32395 | SRR1965220 | 2014 | 7  | Europe    | United Kingdom | Enteritidis | Enteritidis | 1425  | 26315 |
| SAL_CA4691AA | 76000 | SRR1965219 | 2014 | 12 | Europe    | United Kingdom | Enteritidis | Enteritidis | 1425  | 26314 |
| SAL_CA4694AA | 99786 | SRR1965216 | 2015 | 3  | Europe    | United Kingdom | Enteritidis | Enteritidis | 1425  | 26311 |
| SAL_CA4697AA | 50356 | SRR1965213 | 2014 | 9  | 5 Europe  | United Kingdom | Enteritidis | Enteritidis | 3888  | 26308 |
| SAL_CA4701AA | 27800 | SRR1965209 | 2014 | 7  | Europe    | United Kingdom | Enteritidis | Enteritidis | 1425  | 26305 |
| SAL_CA4703AA | 31926 | SRR1965207 | 2014 | 7  | Europe    | United Kingdom | Enteritidis | Enteritidis | 3888  | 26303 |
| SAL_CA4705AA | 91259 | SRR1965204 | 2015 | 2  | Europe    | United Kingdom | Enteritidis | Enteritidis | 1425  | 26301 |
| SAL_CA4713AA | 50339 | SRR1965196 | 2014 | 9  | Europe    | United Kingdom | Enteritidis | Enteritidis | 1425  | 26295 |
| SAL_CA4714AA | 25186 | SRR1965195 | 2014 | 7  | Europe    | United Kingdom | Enteritidis | Enteritidis | 1425  | 26294 |
| SAL_CA4719AA | 3769  | SRR1965190 | 2014 | 4  | Europe    | United Kingdom | Enteritidis | Enteritidis | 3888  | 26289 |
| SAL_CA4724AA | 56155 | SRR1965185 | 2014 | 9  | Europe    | United Kingdom | Enteritidis | Enteritidis | 3888  | 26284 |
| SAL_CA4725AA | 72266 | SRR1965184 | 2014 | 11 | Europe    | United Kingdom | Enteritidis | Enteritidis | 1425  | 26283 |
| SAL_CA4727AA | 63907 | SRR1965182 | 2014 | 11 | Europe    | United Kingdom | Enteritidis | Enteritidis | 1425  | 26282 |
| SAL_CA4733AA | 98282 | SRR1965175 | 2015 | 3  | Europe    | United Kingdom | Enteritidis | Enteritidis | 1425  | 26278 |
| SAL_CA4740AA | 40799 | SRR1965168 | 2014 | 8  | 15 Europe | United Kingdom | Enteritidis | Enteritidis | 3888  | 26270 |
| SAL_CA4741AA | 65371 | SRR1965167 | 2014 | 10 | Europe    | United Kingdom | Enteritidis | Enteritidis | 1425  | 26271 |
| SAL_CA4743AA | 65368 | SRR1965165 | 2014 | 10 | Europe    | United Kingdom | Enteritidis | Enteritidis | 1425  | 26268 |
| SAL_CA4753AA | 65330 | SRR1965155 | 2014 | 9  | Europe    | United Kingdom | Enteritidis | Enteritidis | 1425  | 25842 |
| SAL_CA4765AA | 41997 | SRR1965143 | 2014 | 8  | Europe    | United Kingdom | Enteritidis | Enteritidis | 3888  | 26249 |
| SAL_CA4766AA | 38387 | SRR1965142 | 2014 | 8  | Europe    | United Kingdom | Hillingdon  | Enteritidis | 1425  | 26248 |
| SAL_CA4768AA | 25217 | SRR1965140 | 2014 | 7  | Europe    | United Kingdom | Enteritidis | Enteritidis | 1425  | 26246 |
| SAL_CA4770AA | 34205 | SRR1965138 | 2014 | 7  | Europe    | United Kingdom | Enteritidis | Enteritidis | 1425  | 26244 |



|              |       |            |      |    |           |                |             |             |       |       |
|--------------|-------|------------|------|----|-----------|----------------|-------------|-------------|-------|-------|
| SAL_CA4779AA | 50837 | SRR1965128 | 2014 | 9  | Europe    | United Kingdom | Enteritidis | Enteritidis | 3888  | 26235 |
| SAL_CA4780AA | 60106 | SRR1965127 | 2014 | 10 | Europe    | United Kingdom | Enteritidis | Enteritidis | 1425  | 26234 |
| SAL_CA4784AA | 21762 | SRR1965123 | 2014 | 6  | Europe    | United Kingdom | Enteritidis | Enteritidis | 1425  | 26230 |
| SAL_CA4785AA | 32476 | SRR1965122 | 2014 | 7  | 17 Europe | United Kingdom | Enteritidis | Enteritidis | 3888  | 26229 |
| SAL_CA4786AA | 21768 | SRR1965121 | 2014 | 6  | Europe    | United Kingdom | Enteritidis | Enteritidis | 1425  | 26228 |
| SAL_CA4789AA | 40275 | SRR1965117 | 2014 | 8  | Europe    | United Kingdom | Enteritidis | Enteritidis | 3888  | 26225 |
| SAL_CA4792AA | 57102 | SRR1965114 | 2014 | 8  | 11 Europe | United Kingdom | Enteritidis | Enteritidis | 3888  | 26222 |
| SAL_CA4797AA | 6448  | SRR1965109 | 2014 | 4  | Europe    | United Kingdom | Enteritidis | Enteritidis | 1425  | 26218 |
| SAL_CA4799AA | 83355 | SRR1965107 | 2015 | 1  | Europe    | United Kingdom | Enteritidis | Enteritidis | 1425  | 26216 |
| SAL_CA4800AA | 63019 | SRR1965106 | 2014 | 10 | Europe    | United Kingdom | Enteritidis | Enteritidis | 3888  | 26215 |
| SAL_CA4802AA | 80562 | SRR1965104 | 2015 | 1  | Europe    | United Kingdom | Enteritidis | Enteritidis | 1425  | 7117  |
| SAL_CA4805AA | 63773 | SRR1965101 | 2014 | 10 | Europe    | United Kingdom | Enteritidis | Enteritidis | 3888  | 26212 |
| SAL_CA4808AA | 27069 | SRR1965098 | 2014 | 7  | Europe    | United Kingdom | Enteritidis | Enteritidis | 1425  | 26210 |
| SAL_CA4812AA | 40793 | SRR1965094 | 2014 | 8  | 12 Europe | United Kingdom | Enteritidis | Enteritidis | 3888  | 26206 |
| SAL_CA4816AA | 91218 | SRR1965090 | 2015 | 2  | Europe    | United Kingdom | Enteritidis | Enteritidis | 1425  | 26202 |
| SAL_CA4820AA | 38782 | SRR1965086 | 2014 | 8  | Europe    | United Kingdom | Enteritidis | Enteritidis | 1425  | 26198 |
| SAL_CA4822AA | 42000 | SRR1965084 | 2014 | 8  | Europe    | United Kingdom | Enteritidis | Enteritidis | 1425  | 26197 |
| SAL_CA4828AA | 37820 | SRR1965078 | 2014 | 8  | Europe    | United Kingdom | Enteritidis | Enteritidis | 1425  | 26191 |
| SAL_CA4833AA | 3788  | SRR1965073 | 2014 | 4  | Europe    | United Kingdom | Enteritidis | Enteritidis | 1425  | 26186 |
| SAL_CA4837AA | 34180 | SRR1965068 | 2014 | 7  | 17 Europe | United Kingdom | Enteritidis | Enteritidis | 3888  | 26182 |
| SAL_CA4838AA | 5357  | SRR1965067 | 2014 | 4  | Europe    | United Kingdom | Enteritidis | Enteritidis | 3888  | 26181 |
| SAL_CA4849AA | 36497 | SRR1965055 | 2014 | 7  | Europe    | United Kingdom | Enteritidis | Enteritidis | 3888  | 26172 |
| SAL_CA4851AA | 72321 | SRR1965053 | 2014 | 12 | Europe    | United Kingdom | Enteritidis | Enteritidis | 1425  | 25504 |
| SAL_CA4860AA | 34199 | SRR1965044 | 2014 | 7  | 24 Europe | United Kingdom | Enteritidis | Enteritidis | 3888  | 2066  |
| SAL_CA4861AA | 94267 | SRR1965043 | 2015 | 3  | Europe    | United Kingdom | Enteritidis | Enteritidis | 1425  | 26163 |
| SAL_CA4862AA | 38717 | SRR1965042 | 2014 | 8  | Europe    | United Kingdom | Enteritidis | Enteritidis | 3888  | 26162 |
| SAL_CA4863AA | 65459 | SRR1965041 | 2014 | 10 | Europe    | United Kingdom | Enteritidis | Enteritidis | 3888  | 26161 |
| SAL_CA4889AA | 78756 | SRR1963533 | 2014 | 12 | Europe    | United Kingdom | Enteritidis | Enteritidis | 1425  | 26140 |
| SAL_CA4894AA | 66868 | SRR1963528 | 2014 | 10 | Europe    | United Kingdom | Enteritidis | Enteritidis | 1425  | 26136 |
| SAL_CA4898AA | 69225 | SRR1963524 | 2014 | 11 | Europe    | United Kingdom | Enteritidis | Enteritidis | 3888  | 25681 |
| SAL_CA4903AA | 71405 | SRR1963519 | 2012 | 11 | Europe    | United Kingdom | Enteritidis | Enteritidis | 1425  | 26129 |
| SAL_CA4910AA | 78713 | SRR1963512 | 2015 | 1  | Europe    | United Kingdom | Enteritidis | Enteritidis | 1425  | 26124 |
| SAL_CA4911AA | 71577 | SRR1963511 | 2014 | 12 | Europe    | United Kingdom | Enteritidis | Enteritidis | 1425  | 7784  |
| SAL_CA4912AA | 69182 | SRR1963510 | 2014 | 11 | Europe    | United Kingdom | Enteritidis | Enteritidis | 1425  | 26123 |
| SAL_CA4922AA | 71410 | SRR1963500 | 2012 | 11 | Europe    | United Kingdom | Enteritidis | Enteritidis | 1425  | 26115 |
| SAL_CA4927AA | 71406 | SRR1963495 | 2012 | 11 | Europe    | United Kingdom | Enteritidis | Enteritidis | 1425  | 26110 |
| SAL_CA4935AA | 73654 | SRR1963487 | 2014 | 12 | Europe    | United Kingdom | Enteritidis | Enteritidis | 1425  | 24563 |
| SAL_CA4936AA | 66479 | SRR1963486 | 2014 | 10 | Europe    | United Kingdom | Enteritidis | Enteritidis | 1425  | 24563 |
| SAL_CA4937AA | 80364 | SRR1963485 | 2015 | 1  | Europe    | United Kingdom | Enteritidis | Enteritidis | -1678 | 26102 |
| SAL_CA4939AA | 73553 | SRR1963483 | 2014 | 9  | Europe    | United Kingdom | Enteritidis | Enteritidis | 1425  | 26100 |
| SAL_CA4942AA | 70645 | SRR1963480 | 2014 | 11 | Europe    | United Kingdom | Enteritidis | Enteritidis | 1425  | 7784  |
| SAL_CA4943AA | 79105 | SRR1963479 | 2015 | 1  | Europe    | United Kingdom | Enteritidis | Enteritidis | 1425  | 26098 |
| SAL_CA4945AA | 80342 | SRR1963477 | 2015 | 1  | Europe    | United Kingdom | Enteritidis | Enteritidis | 1425  | 26097 |
| SAL_CA4947AA | 78670 | SRR1963475 | 2014 | 12 | Europe    | United Kingdom | Enteritidis | Enteritidis | 1425  | 25341 |
| SAL_CA4952AA | 71390 | SRR1963470 | 2012 | 11 | Europe    | United Kingdom | Enteritidis | Enteritidis | 1425  | 26091 |
| SAL_CA4953AA | 70646 | SRR1963469 | 2014 | 11 | Europe    | United Kingdom | Enteritidis | Enteritidis | 1425  | 26090 |
| SAL_CA4954AA | 80350 | SRR1963468 | 2015 | 1  | Europe    | United Kingdom | Enteritidis | Enteritidis | 1425  | 7210  |
| SAL_CA4958AA | 80348 | SRR1963464 | 2015 | 1  | Europe    | United Kingdom | Enteritidis | Enteritidis | 28119 | 26087 |
| SAL_CA4966AA | 69773 | SRR1963456 | 2014 | 11 | Europe    | United Kingdom | Enteritidis | Enteritidis | 1425  | 26079 |
| SAL_CA4967AA | 71386 | SRR1963455 | 2012 | 11 | Europe    | United Kingdom | Enteritidis | Enteritidis | 1425  | 26078 |
| SAL_CA4968AA | 73554 | SRR1963454 | 2014 | 9  | 22 Europe | United Kingdom | Enteritidis | Enteritidis | 1425  | 26077 |
| SAL_CA4980AA | 71398 | SRR1963442 | 2012 | 11 | Europe    | United Kingdom | Enteritidis | Enteritidis | 1425  | 26067 |
| SAL_CA4981AA | 78662 | SRR1963441 | 2014 | 12 | Europe    | United Kingdom | Enteritidis | Enteritidis | 1425  | 7043  |
| SAL_CA4983AA | 78697 | SRR1963439 | 2014 | 12 | Europe    | United Kingdom | Enteritidis | Enteritidis | -1736 | 26064 |
| SAL_CA4985AA | 78759 | SRR1963437 | 2014 | 12 | Europe    | United Kingdom | Enteritidis | Enteritidis | 3888  | 404   |
| SAL_CA4988AA | 71403 | SRR1963434 | 2012 | 11 | Europe    | United Kingdom | Enteritidis | Enteritidis | 1425  | 26060 |
| SAL_CA4990AA | 79106 | SRR1963432 | 2015 | 1  | Europe    | United Kingdom | Enteritidis | Enteritidis | 1425  | 26058 |
| SAL_CA4998AA | 66885 | SRR1963409 | 2014 | 10 | Europe    | United Kingdom | Enteritidis | Enteritidis | 1425  | 16325 |
| SAL_CA4999AA | 66886 | SRR1963408 | 2014 | 10 | Europe    | United Kingdom | Enteritidis | Enteritidis | 1425  | 24879 |

|              |       |            |      |    |           |                |             |             |       |       |
|--------------|-------|------------|------|----|-----------|----------------|-------------|-------------|-------|-------|
| SAL_CA5004AA | 68899 | SRR1963385 | 2014 | 10 | Europe    | United Kingdom | Enteritidis | Enteritidis | 1425  | 24879 |
| SAL_CA5007AA | 71573 | SRR1963382 | 2014 | 12 | Europe    | United Kingdom | Enteritidis | Enteritidis | 1425  | 26047 |
| SAL_CA5026AA | 80295 | SRR1963363 | 2014 | 12 | Europe    | United Kingdom | Enteritidis | Enteritidis | 1425  | 25341 |
| SAL_CA5027AA | 79060 | SRR1963361 | 2015 | 1  | Europe    | United Kingdom | Enteritidis | Enteritidis | 1425  | 26030 |
| SAL_CA5033AA | 71402 | SRR1963355 | 2012 | 11 | Europe    | United Kingdom | Enteritidis | Enteritidis | 1425  | 26024 |
| SAL_CA5039AA | 79088 | SRR1963349 | 2015 | 1  | Europe    | United Kingdom | Enteritidis | Enteritidis | 1425  | 26018 |
| SAL_CA5048AA | 73580 | SRR1963340 | 2014 | 9  | Europe    | United Kingdom | Enteritidis | Enteritidis | 1425  | 26010 |
| SAL_CA5049AA | 74304 | SRR1963339 | 2014 | 12 | Europe    | United Kingdom | Enteritidis | Enteritidis | 1425  | 26009 |
| SAL_CA5052AA | 69216 | SRR1963335 | 2014 | 11 | Europe    | United Kingdom | Enteritidis | Enteritidis | 26465 | 26006 |
| SAL_CA5061AA | 69697 | SRR1963326 | 2014 | 11 | Europe    | United Kingdom | Enteritidis | Enteritidis | 1425  | 24879 |
| SAL_CA5063AA | 69749 | SRR1963324 | 2014 | 11 | Europe    | United Kingdom | Enteritidis | Enteritidis | 26481 | 25998 |
| SAL_CA5065AA | 71389 | SRR1963322 | 2012 | 11 | Europe    | United Kingdom | Enteritidis | Enteritidis | 1425  | 25997 |
| SAL_CA5066AA | 78968 | SRR1963321 | 2015 | 1  | Europe    | United Kingdom | Enteritidis | Enteritidis | 1425  | 25996 |
| SAL_CA5067AA | 79109 | SRR1963320 | 2015 | 1  | Europe    | United Kingdom | Enteritidis | Enteritidis | 1425  | 25808 |
| SAL_CA5068AA | 75675 | SRR1963319 | 2014 | 12 | Europe    | United Kingdom | Enteritidis | Enteritidis | 1425  | 25995 |
| SAL_CA5073AA | 71560 | SRR1963314 | 2014 | 12 | Europe    | United Kingdom | Enteritidis | Enteritidis | 1425  | 25990 |
| SAL_CA5084AA | 79112 | SRR1963303 | 2015 | 1  | Europe    | United Kingdom | Enteritidis | Enteritidis | 3888  | 25602 |
| SAL_CA5090AA | 78737 | SRR1963297 | 2014 | 12 | Europe    | United Kingdom | Enteritidis | Enteritidis | 1425  | 25976 |
| SAL_CA5094AA | 78706 | SRR1963293 | 2014 | 12 | Europe    | United Kingdom | Enteritidis | Enteritidis | 1425  | 25973 |
| SAL_CA5101AA | 73579 | SRR1963286 | 2014 | 9  | Europe    | United Kingdom | Enteritidis | Enteritidis | 1425  | 25968 |
| SAL_CA5102AA | 78755 | SRR1963285 | 2014 | 12 | Europe    | United Kingdom | Enteritidis | Enteritidis | 3888  | 404   |
| SAL_CA5104AA | 74310 | SRR1963283 | 2014 | 12 | Europe    | United Kingdom | Enteritidis | Enteritidis | 1425  | 25966 |
| SAL_CA5107AA | 68897 | SRR1963280 | 2014 | 10 | Europe    | United Kingdom | Enteritidis | Enteritidis | 3888  | 24864 |
| SAL_CA5108AA | 73606 | SRR1963279 | 2014 | 12 | Europe    | United Kingdom | Enteritidis | Enteritidis | 1425  | 25963 |
| SAL_CA5115AA | 69699 | SRR1963272 | 2014 | 11 | 12 Europe | United Kingdom | Enteritidis | Enteritidis | 3888  | 24946 |
| SAL_CA5117AA | 81174 | SRR1963270 | 2015 | 1  | Europe    | United Kingdom | Enteritidis | Enteritidis | 1425  | 25956 |
| SAL_CA5118AA | 70666 | SRR1963269 | 2014 | 11 | 27 Europe | United Kingdom | Enteritidis | Enteritidis | 1425  | 25955 |
| SAL_CA5123AA | 73575 | SRR1963264 | 2014 | 9  | Europe    | United Kingdom | Enteritidis | Enteritidis | 1425  | 25305 |
| SAL_CA5132AA | 73577 | SRR1963255 | 2014 | 9  | Europe    | United Kingdom | Enteritidis | Enteritidis | 1425  | 7710  |
| SAL_CA5138AA | 70663 | SRR1963249 | 2014 | 11 | Europe    | United Kingdom | Enteritidis | Enteritidis | 3900  | 25940 |
| SAL_CA5139AA | 66883 | SRR1963248 | 2014 | 10 | Europe    | United Kingdom | Enteritidis | Enteritidis | 1425  | 7043  |
| SAL_CA5143AA | 80323 | SRR1963244 | 2015 | 1  | Europe    | United Kingdom | Enteritidis | Enteritidis | 3888  | 3637  |
| SAL_CA5145AA | 43417 | SRR1963242 | 2014 | 9  | Europe    | United Kingdom | Enteritidis | Enteritidis | 1425  | 25936 |
| SAL_CA5148AA | 69212 | SRR1963233 | 2014 | 11 | Europe    | United Kingdom | Enteritidis | Enteritidis | 1425  | 25933 |
| SAL_CA5149AA | 79111 | SRR1963232 | 2015 | 1  | Europe    | United Kingdom | Enteritidis | Enteritidis | 1425  | 25932 |
| SAL_CA5151AA | 71595 | SRR1963230 | 2014 | 12 | Europe    | United Kingdom | Enteritidis | Enteritidis | 1425  | 25930 |
| SAL_CA5169AA | 69767 | SRR1963145 | 2014 | 11 | Europe    | United Kingdom | Enteritidis | Enteritidis | 1425  | 25918 |
| SAL_CA5175AA | 78615 | SRR1963118 | 2014 | 12 | Europe    | United Kingdom | Enteritidis | Enteritidis | 1425  | 25914 |
| SAL_CA5176AA | 71393 | SRR1963117 | 2012 | 11 | Europe    | United Kingdom | Enteritidis | Enteritidis | 1425  | 25913 |
| SAL_CA5193AA | 80322 | SRR1963100 | 2015 | 1  | Europe    | United Kingdom | Enteritidis | Enteritidis | 3888  | 25900 |
| SAL_CA5196AA | 71575 | SRR1963097 | 2014 | 12 | Europe    | United Kingdom | Enteritidis | Enteritidis | 1425  | 25897 |
| SAL_CA5199AA | 70622 | SRR1963094 | 2014 | 8  | Europe    | United Kingdom | Enteritidis | Enteritidis | 27796 | 25894 |
| SAL_CA5203AA | 69227 | SRR1963090 | 2014 | 11 | Europe    | United Kingdom | Enteritidis | Enteritidis | 1425  | 25859 |
| SAL_CA5206AA | 70700 | SRR1963087 | 2014 | 12 | Europe    | United Kingdom | Enteritidis | Enteritidis | 1425  | 25888 |
| SAL_CA5207AA | 70661 | SRR1963086 | 2014 | 11 | Europe    | United Kingdom | Enteritidis | Enteritidis | 3888  | 25887 |
| SAL_CA5209AA | 80345 | SRR1963084 | 2015 | 1  | Europe    | United Kingdom | Enteritidis | Enteritidis | 3906  | 25663 |
| SAL_CA5212AA | 69209 | SRR1963081 | 2014 | 11 | Europe    | United Kingdom | Enteritidis | Enteritidis | 1425  | 25884 |
| SAL_CA5215AA | 70696 | SRR1963078 | 2014 | 12 | Europe    | United Kingdom | Enteritidis | Enteritidis | 1425  | 25881 |
| SAL_CA5219AA | 71538 | SRR1963074 | 2014 | 12 | Europe    | United Kingdom | Enteritidis | Enteritidis | 1425  | 25878 |
| SAL_CA5222AA | 74309 | SRR1963071 | 2014 | 11 | 27 Europe | United Kingdom | Enteritidis | Enteritidis | 3888  | 7317  |
| SAL_CA5226AA | 74303 | SRR1963067 | 2014 | 12 | Europe    | United Kingdom | Enteritidis | Enteritidis | 1425  | 25873 |
| SAL_CA5230AA | 69701 | SRR1962576 | 2014 | 11 | Europe    | United Kingdom | Enteritidis | Enteritidis | 3888  | 25870 |
| SAL_CA5233AA | 70697 | SRR1962558 | 2014 | 12 | Europe    | United Kingdom | Enteritidis | Enteritidis | 1425  | 25868 |
| SAL_CA5238AA | 70693 | SRR1962530 | 2014 | 12 | Europe    | United Kingdom | Enteritidis | Enteritidis | 3888  | 25681 |
| SAL_CA5243AA | 69750 | SRR1962403 | 2014 | 11 | Europe    | United Kingdom | Enteritidis | Enteritidis | 1425  | 25859 |
| SAL_CA5249AA | 71594 | SRR1962287 | 2014 | 12 | Europe    | United Kingdom | Enteritidis | Enteritidis | 1425  | 25853 |
| SAL_CA5250AA | 78758 | SRR1962286 | 2014 | 12 | Europe    | United Kingdom | Enteritidis | Enteritidis | 1425  | 25852 |
| SAL_CA5251AA | 71585 | SRR1962285 | 2014 | 12 | Europe    | United Kingdom | Enteritidis | Enteritidis | 3888  | 25851 |
| SAL_CA5256AA | 66880 | SRR1962067 | 2014 | 10 | Europe    | United Kingdom | Enteritidis | Enteritidis | 1425  | 24879 |

|              |              |            |      |    |               |                |                         |             |       |       |
|--------------|--------------|------------|------|----|---------------|----------------|-------------------------|-------------|-------|-------|
| SAL_CA5257AA | 69195        | SRR1962045 | 2014 | 11 | Europe        | United Kingdom | Enteritidis             | Enteritidis | 1425  | 25846 |
| SAL_CA5260AA | 69748        | SRR1962042 | 2014 | 11 | Europe        | United Kingdom | Enteritidis             | Enteritidis | 1425  | 25843 |
| SAL_CA5261AA | 68895        | SRR1962041 | 2014 | 10 | Europe        | United Kingdom | Enteritidis             | Enteritidis | 1425  | 25842 |
| SAL_CA5264AA | 73605        | SRR1961943 | 2014 | 12 | Europe        | United Kingdom | Enteritidis             | Enteritidis | 1425  | 25840 |
| SAL_CA5267AA | 71399        | SRR1961830 | 2012 | 11 | Europe        | United Kingdom | Enteritidis             | Enteritidis | 1425  | 25838 |
| SAL_CA5272AA | 78757        | SRR1961770 | 2014 | 12 | Europe        | United Kingdom | Enteritidis             | Enteritidis | 3897  | 25834 |
| SAL_CA5273AA | 69700        | SRR1961769 | 2014 | 11 | Europe        | United Kingdom | Enteritidis             | Enteritidis | 1425  | 25833 |
| SAL_CA5275AA | 71407        | SRR1961727 | 2012 | 11 | Europe        | United Kingdom | Enteritidis             | Enteritidis | 1425  | 25831 |
| SAL_CA5276AA | 73627        | SRR1961686 | 2014 | 12 | Europe        | United Kingdom | Enteritidis             | Enteritidis | 1425  | 25830 |
| SAL_CA5284AA | 66443        | SRR1961506 | 2014 | 10 | Europe        | United Kingdom | Enteritidis             | Enteritidis | 1425  | 24879 |
| SAL_CA5285AA | 73535        | SRR1961505 | 2014 | 9  | 19 Europe     | United Kingdom | Enteritidis             | Enteritidis | 1425  | 50869 |
| SAL_CA5287AA | 66884        | SRR1961503 | 2014 | 10 | Europe        | United Kingdom | Enteritidis             | Enteritidis | 3888  | 25821 |
| SAL_CA5290AA | 71597        | SRR1961080 | 2014 | 12 | Europe        | United Kingdom | Enteritidis             | Enteritidis | 1425  | 25818 |
| SAL_CA5293AA | 73544        | SRR1960997 | 2014 | 9  | Europe        | United Kingdom | Enteritidis             | Enteritidis | 1425  | 25816 |
| SAL_CA5295AA | 69741        | SRR1960986 | 2014 | 11 | Europe        | United Kingdom | Enteritidis             | Enteritidis | 3888  | 25814 |
| SAL_CA5298AA | 66882        | SRR1960983 | 2014 | 10 | Europe        | United Kingdom | Enteritidis             | Enteritidis | 1425  | 24563 |
| SAL_CA5301AA | 79090        | SRR1960954 | 2015 | 1  | Europe        | United Kingdom | Enteritidis             | Enteritidis | 1425  | 25809 |
| SAL_CA5302AA | 80341        | SRR1960928 | 2015 | 1  | 13 Europe     | United Kingdom | Enteritidis             | Enteritidis | 1425  | 25808 |
| SAL_CA5305AA | 80304        | SRR1960843 | 2015 | 1  | Europe        | United Kingdom | Enteritidis             | Enteritidis | 3888  | 25805 |
| SAL_CA5315AA | 80363        | SRR1960665 | 2015 | 1  | 14 Europe     | United Kingdom | Enteritidis             | Enteritidis | 1425  | 25798 |
| SAL_CA5325AA | 70659        | SRR1960410 | 2014 | 11 | Europe        | United Kingdom | Enteritidis             | Enteritidis | 3888  | 25681 |
| SAL_CA5328AA | 73655        | SRR1960384 | 2014 | 12 | Europe        | United Kingdom | Enteritidis             | Enteritidis | 1425  | 25788 |
| SAL_CA5334AA | 69702        | SRR1960378 | 2014 | 11 | 19 Europe     | United Kingdom | Enteritidis             | Enteritidis | 1425  | 25786 |
| SAL_CA5338AA | 78730        | SRR1960374 | 2014 | 12 | Europe        | United Kingdom | Enteritidis             | Enteritidis | 1425  | 25782 |
| SAL_CA5341AA | 71391        | SRR1960370 | 2012 | 11 | Europe        | United Kingdom | Enteritidis             | Enteritidis | 3888  | 25779 |
| SAL_CA5358AA | 73657        | SRR1960353 | 2014 | 12 | Europe        | United Kingdom | Enteritidis             | Enteritidis | 1425  | 25763 |
| SAL_CA5361AA | 80367        | SRR1960341 | 2015 | 1  | Europe        | United Kingdom | Enteritidis             | Enteritidis | 1425  | 25546 |
| SAL_CA5363AA | 69224        | SRR1960326 | 2014 | 11 | Europe        | United Kingdom | Enteritidis             | Enteritidis | 1425  | 25761 |
| SAL_CA5365AA | 80339        | SRR1960324 | 2015 | 1  | Europe        | United Kingdom | Enteritidis             | Enteritidis | 1425  | 25759 |
| SAL_CA5370AA | 73583        | SRR1960319 | 2014 | 9  | Europe        | United Kingdom | Enteritidis             | Enteritidis | 3888  | 25755 |
| SAL_CA5371AA | PNUSAS000259 | SRR1960318 |      |    | North America | United States  | Enteritidis (Predicted) | Enteritidis | 1425  | 25754 |
| SAL_CA5372AA | PNUSAS000258 | SRR1960317 |      |    | North America | United States  | Enteritidis (Predicted) | Enteritidis | 7801  | 25753 |
| SAL_CA5373AA | PNUSAS000257 | SRR1960316 |      |    | North America | United States  | Enteritidis (Predicted) | Enteritidis | 1425  | 16644 |
| SAL_CA5377AA | 71388        | SRR1960312 | 2012 | 11 | Europe        | United Kingdom | Enteritidis             | Enteritidis | 1425  | 25749 |
| SAL_CA5380AA | PNUSAS000255 | SRR1960309 |      |    | North America | United States  | Enteritidis (Predicted) | Enteritidis | 1425  | 25746 |
| SAL_CA5381AA | PNUSAS000256 | SRR1960308 | 2015 | 3  | North America | United States  | Enteritidis             | Enteritidis | 1425  | 25745 |
| SAL_CA5382AA | PNUSAS000253 | SRR1960307 | 2015 | 2  | North America | United States  | Enteritidis             | Enteritidis | 8003  | 25744 |
| SAL_CA5385AA | PNUSAS000252 | SRR1960304 | 2015 | 3  | North America | United States  | Enteritidis             | Enteritidis | 1425  | 25741 |
| SAL_CA5386AA | PNUSAS000251 | SRR1960303 | 2015 | 3  | North America | United States  | Enteritidis             | Enteritidis | 1425  | 12315 |
| SAL_CA5387AA | PNUSAS000249 | SRR1960302 | 2015 | 3  | North America | United States  | Enteritidis             | Enteritidis | 1425  | 25740 |
| SAL_CA5388AA | PNUSAS000250 | SRR1960301 | 2015 | 3  | North America | United States  | Enteritidis             | Enteritidis | 1425  | 25739 |
| SAL_CA5389AA | PNUSAS000248 | SRR1960300 | 2015 | 3  | North America | United States  | Enteritidis             | Enteritidis | 27901 | 25738 |
| SAL_CA5390AA | PNUSAS000247 | SRR1960299 | 2015 | 3  | North America | United States  | Enteritidis             | Enteritidis | 1425  | 25737 |
| SAL_CA5391AA | PNUSAS000246 | SRR1960298 | 2015 | 3  | North America | United States  | Enteritidis             | Enteritidis | 1425  | 25736 |
| SAL_CA5392AA | 69705        | SRR1960297 | 2014 | 11 | Europe        | United Kingdom | Enteritidis             | Enteritidis | 1425  | 25735 |
| SAL_CA5395AA | 80344        | SRR1960294 | 2015 | 1  | Europe        | United Kingdom | Enteritidis             | Enteritidis | 3906  | 25663 |
| SAL_CA5398AA | PNUSAS000245 | SRR1960291 | 2015 | 3  | North America | United States  | Enteritidis             | Enteritidis | 1425  | 25730 |
| SAL_CA5400AA | PNUSAS000244 | SRR1960289 |      |    | North America | United States  | Enteritidis (Predicted) | Enteritidis | 1425  | 25728 |
| SAL_CA5401AA | PNUSAS000243 | SRR1960288 |      |    | North America | United States  | Enteritidis (Predicted) | Enteritidis | 1425  | 25727 |
| SAL_CA5402AA | PNUSAS000242 | SRR1960287 | 2015 | 3  | North America | United States  | Enteritidis             | Enteritidis | 1425  | 25726 |
| SAL_CA5403AA | PNUSAS000241 | SRR1960286 | 2015 | 2  | North America | United States  | Enteritidis             | Enteritidis | 1425  | 25725 |
| SAL_CA5409AA | PNUSAS000215 | SRR1960280 | 2014 | 12 | North America | United States  | Enteritidis             | Enteritidis | 1425  | 23798 |
| SAL_CA5414AA | 78958        | SRR1960275 | 2015 | 1  | Europe        | United Kingdom | Enteritidis             | Enteritidis | 1425  | 25717 |
| SAL_CA5416AA | 70694        | SRR1960273 | 2014 | 12 | Europe        | United Kingdom | Enteritidis             | Enteritidis | 3888  | 25715 |
| SAL_CA5420AA | PNUSAS000194 | SRR1960269 |      |    | North America | United States  | Enteritidis (Predicted) | Enteritidis | 1425  | 2668  |
| SAL_CA5421AA | 69218        | SRR1960268 | 2014 | 11 | Europe        | United Kingdom | Enteritidis             | Enteritidis | 1425  | 25711 |
| SAL_CA5422AA | PNUSAS000193 | SRR1960267 | 2015 | 1  | North America | United States  | Enteritidis             | Enteritidis | 1425  | 25710 |
| SAL_CA5423AA | PNUSAS000192 | SRR1960266 | 2015 | 1  | North America | United States  | Enteritidis             | Enteritidis | 8003  | 25709 |
| SAL_CA5424AA | PNUSAS000191 | SRR1960265 | 2015 | 1  | North America | United States  | Enteritidis             | Enteritidis | 8003  | 18361 |

|              |              |            |      |    |               |                |                         |             |       |       |
|--------------|--------------|------------|------|----|---------------|----------------|-------------------------|-------------|-------|-------|
| SAL_CA5426AA | PNUSAS000190 | SRR1960263 | 2015 | 1  | North America | United States  | Enteritidis (Predicted) | Enteritidis | 1425  | 25707 |
| SAL_CA5433AA | 79084        | SRR1960256 | 2015 | 1  | Europe        | United Kingdom | Enteritidis             | Enteritidis | 1425  | 25700 |
| SAL_CA5436AA | 79068        | SRR1960253 | 2015 | 1  | Europe        | United Kingdom | Enteritidis             | Enteritidis | 1425  | 25697 |
| SAL_CA5440AA | 71387        | SRR1960249 | 2012 | 11 | Europe        | United Kingdom | Enteritidis             | Enteritidis | 1425  | 25693 |
| SAL_CA5441AA | 70653        | SRR1960241 | 2014 | 11 | Europe        | United Kingdom | Enteritidis             | Enteritidis | 3888  | 25692 |
| SAL_CA5445AA | 69222        | SRR1960237 | 2014 | 11 | Europe        | United Kingdom | Enteritidis             | Enteritidis | 3888  | 25688 |
| SAL_CA5446AA | 73639        | SRR1960236 | 2014 | 12 | 10 Europe     | United Kingdom | Enteritidis             | Enteritidis | 1425  | 25687 |
| SAL_CA5448AA | 78718        | SRR1960234 | 2014 | 12 | Europe        | United Kingdom | Enteritidis             | Enteritidis | 1425  | 7043  |
| SAL_CA5449AA | 69198        | SRR1960233 | 2014 | 11 | Europe        | United Kingdom | Enteritidis             | Enteritidis | 1425  | 25482 |
| SAL_CA5450AA | 75674        | SRR1960232 | 2014 | 12 | Europe        | United Kingdom | Enteritidis             | Enteritidis | 1425  | 25685 |
| SAL_CA5454AA | 71584        | SRR1960228 | 2014 | 12 | Europe        | United Kingdom | Enteritidis             | Enteritidis | 3888  | 25681 |
| SAL_CA5455AA | 78622        | SRR1960227 | 2014 | 12 | Europe        | United Kingdom | Enteritidis             | Enteritidis | 1425  | 25680 |
| SAL_CA5459AA | 71395        | SRR1960223 | 2012 | 11 | Europe        | United Kingdom | Enteritidis             | Enteritidis | 1425  | 25677 |
| SAL_CA5460AA | 75759        | SRR1960222 | 2014 | 12 | Europe        | United Kingdom | Enteritidis             | Enteritidis | 3941  | 25676 |
| SAL_CA5461AA | 70647        | SRR1960221 | 2014 | 11 | Europe        | United Kingdom | Enteritidis             | Enteritidis | 1425  | 25675 |
| SAL_CA5471AA | 69219        | SRR1960211 | 2014 | 11 | Europe        | United Kingdom | Enteritidis             | Enteritidis | 1425  | 2067  |
| SAL_CA5472AA | 69211        | SRR1960210 | 2014 | 11 | Europe        | United Kingdom | Enteritidis             | Enteritidis | 1425  | 25666 |
| SAL_CA5475AA | 79082        | SRR1960207 | 2015 | 1  | Europe        | United Kingdom | Enteritidis             | Enteritidis | 3906  | 25663 |
| SAL_CA5477AA | 78664        | SRR1960205 | 2014 | 12 | Europe        | United Kingdom | Enteritidis             | Enteritidis | 1425  | 25661 |
| SAL_CA5490AA | 71401        | SRR1960192 | 2012 | 11 | Europe        | United Kingdom | Enteritidis             | Enteritidis | 1425  | 25649 |
| SAL_CA5491AA | 74270        | SRR1960191 | 2014 | 11 | Europe        | United Kingdom | Enteritidis             | Enteritidis | 1425  | 25648 |
| SAL_CA5501AA | 73622        | SRR1960181 | 2014 | 12 | Europe        | United Kingdom | Enteritidis             | Enteritidis | 1425  | 25638 |
| SAL_CA5507AA | 78695        | SRR1960166 | 2014 | 12 | 24 Europe     | United Kingdom | Enteritidis             | Enteritidis | 1425  | 25635 |
| SAL_CA5517AA | 71404        | SRR1960145 | 2012 | 11 | Europe        | United Kingdom | Enteritidis             | Enteritidis | 1425  | 25629 |
| SAL_CA5519AA | 80324        | SRR1960143 | 2015 | 1  | Europe        | United Kingdom | Enteritidis             | Enteritidis | 3888  | 3635  |
| SAL_CA5526AA | 80353        | SRR1960136 | 2015 | 1  | Europe        | United Kingdom | Enteritidis             | Enteritidis | 1425  | 25388 |
| SAL_CA5528AA | 78668        | SRR1960134 | 2014 | 12 | Europe        | United Kingdom | Enteritidis             | Enteritidis | 1425  | 25621 |
| SAL_CA5544AA | 69772        | SRR1960095 | 2014 | 11 | Europe        | United Kingdom | Enteritidis             | Enteritidis | 1425  | 25607 |
| SAL_CA5547AA | 80351        | SRR1960092 | 2015 | 1  | Europe        | United Kingdom | Enteritidis             | Enteritidis | 3888  | 25605 |
| SAL_CA5548AA | 78719        | SRR1960091 | 2015 | 1  | Europe        | United Kingdom | Enteritidis             | Enteritidis | 1425  | 25604 |
| SAL_CA5550AA | 79107        | SRR1960089 | 2015 | 1  | Europe        | United Kingdom | Enteritidis             | Enteritidis | 3888  | 25602 |
| SAL_CA5551AA | 73572        | SRR1960088 | 2014 | 9  | Europe        | United Kingdom | Enteritidis             | Enteritidis | 1425  | 25601 |
| SAL_CA5556AA | 70668        | SRR1960083 | 2014 | 11 | Europe        | United Kingdom | Enteritidis             | Enteritidis | 1425  | 25596 |
| SAL_CA5557AA | 78686        | SRR1960082 | 2014 | 12 | Europe        | United Kingdom | Enteritidis             | Enteritidis | 1425  | 25595 |
| SAL_CA5561AA | 79069        | SRR1960078 | 2015 | 1  | Europe        | United Kingdom | Enteritidis             | Enteritidis | 1425  | 25592 |
| SAL_CA5566AA | 71409        | SRR1960073 | 2012 | 11 | 6 Europe      | United Kingdom | Enteritidis             | Enteritidis | 1425  | 25587 |
| SAL_CA5568AA | 79087        | SRR1960070 | 2015 | 1  | Europe        | United Kingdom | Enteritidis             | Enteritidis | 1425  | 25586 |
| SAL_CA5573AA | 78956        | SRR1960057 | 2015 | 1  | Europe        | United Kingdom | Enteritidis             | Enteritidis | 1425  | 25582 |
| SAL_CA5580AA | 71408        | SRR1960050 | 2012 | 11 | Europe        | United Kingdom | Enteritidis             | Enteritidis | 1425  | 25577 |
| SAL_CA5581AA | 79022        | SRR1960049 | 2015 | 1  | Europe        | United Kingdom | Enteritidis             | Enteritidis | 1425  | 25576 |
| SAL_CA5596AA | 73623        | SRR1960034 | 2014 | 12 | Europe        | United Kingdom | Enteritidis             | Enteritidis | 1425  | 25341 |
| SAL_CA5598AA | 69743        | SRR1960032 | 2014 | 11 | 13 Europe     | United Kingdom | Enteritidis             | Enteritidis | 3888  | 25562 |
| SAL_CA5599AA | 78699        | SRR1960031 | 2014 | 12 | Europe        | United Kingdom | Enteritidis             | Enteritidis | 1425  | 25561 |
| SAL_CA5606AA | 68893        | SRR1959724 | 2014 | 10 | Europe        | United Kingdom | Enteritidis             | Enteritidis | 1425  | 25555 |
| SAL_CA5611AA | 74301        | SRR1959719 | 2014 | 12 | Europe        | United Kingdom | Enteritidis             | Enteritidis | 1425  | 25550 |
| SAL_CA5615AA | 71533        | SRR1959512 | 2014 | 11 | Europe        | United Kingdom | Enteritidis             | Enteritidis | 1425  | 25546 |
| SAL_CA5617AA | 80352        | SRR1959510 | 2015 | 1  | Europe        | United Kingdom | Enteritidis             | Enteritidis | 1425  | 25544 |
| SAL_CA5624AA | 75746        | SRR1959503 | 2014 | 12 | Europe        | United Kingdom | Enteritidis             | Enteritidis | 1425  | 25537 |
| SAL_CA5627AA | 68898        | SRR1959498 | 2014 | 10 | Europe        | United Kingdom | Enteritidis             | Enteritidis | 1425  | 25534 |
| SAL_CA5636AA | 80347        | SRR1959487 | 2015 | 1  | Europe        | United Kingdom | Enteritidis             | Enteritidis | 1425  | 25525 |
| SAL_CA5638AA | 78717        | SRR1959485 | 2015 | 1  | Europe        | United Kingdom | Enteritidis             | Enteritidis | 28416 | 25524 |
| SAL_CA5639AA | 73581        | SRR1959484 | 2014 | 9  | Europe        | United Kingdom | Enteritidis             | Enteritidis | 3888  | 25523 |
| SAL_CA5643AA | 69742        | SRR1959479 | 2014 | 11 | Europe        | United Kingdom | Enteritidis             | Enteritidis | 1425  | 25519 |
| SAL_CA5654AA | 68894        | SRR1959468 | 2014 | 10 | 23 Europe     | United Kingdom | Enteritidis             | Enteritidis | 1425  | 25510 |
| SAL_CA5661AA | 79086        | SRR1959461 | 2015 | 1  | Europe        | United Kingdom | Enteritidis             | Enteritidis | 1425  | 7210  |
| SAL_CA5663AA | 69189        | SRR1959459 | 2014 | 11 | Europe        | United Kingdom | Enteritidis             | Enteritidis | 1425  | 24707 |
| SAL_CA5664AA | 80340        | SRR1959458 | 2015 | 1  | Europe        | United Kingdom | Enteritidis             | Enteritidis | 1425  | 25505 |
| SAL_CA5665AA | 69745        | SRR1959457 | 2014 | 11 | Europe        | United Kingdom | Enteritidis             | Enteritidis | 1425  | 25504 |
| SAL_CA5667AA | 69769        | SRR1959455 | 2014 | 11 | Europe        | United Kingdom | Enteritidis             | Enteritidis | 1425  | 25502 |

|              |                   |            |      |    |    |               |                |                         |             |       |       |
|--------------|-------------------|------------|------|----|----|---------------|----------------|-------------------------|-------------|-------|-------|
| SAL_CA5678AA | 71396             | SRR1959443 | 2012 | 11 | 6  | Europe        | United Kingdom | Enteritidis             | Enteritidis | 1425  | 25491 |
| SAL_CA5685AA | 68875             | SRR1959435 | 2014 | 10 |    | Europe        | United Kingdom | Enteritidis             | Enteritidis | 3888  | 25485 |
| SAL_CA5686AA | 71570             | SRR1959434 | 2014 | 12 |    | Europe        | United Kingdom | Enteritidis             | Enteritidis | 1425  | 25484 |
| SAL_CA5689AA | 69139             | SRR1959431 | 2014 | 11 |    | Europe        | United Kingdom | Enteritidis             | Enteritidis | 1425  | 25482 |
| SAL_CA5692AA | 71392             | SRR1959428 | 2012 | 11 |    | Europe        | United Kingdom | Enteritidis             | Enteritidis | 1425  | 25479 |
| SAL_CA5699AA | 69744             | SRR1959421 | 2014 | 11 |    | Europe        | United Kingdom | Enteritidis             | Enteritidis | 1425  | 25474 |
| SAL_CA5705AA | 80343             | SRR1959415 | 2015 | 1  |    | Europe        | United Kingdom | Enteritidis             | Enteritidis | 1425  | 25468 |
| SAL_CA5716AA | 78703             | SRR1959404 | 2014 | 12 |    | Europe        | United Kingdom | Enteritidis             | Enteritidis | 1425  | 25457 |
| SAL_CA5721AA | 68896             | SRR1959399 | 2014 | 10 |    | Europe        | United Kingdom | Enteritidis             | Enteritidis | 1425  | 25454 |
| SAL_CA5722AA | 69192             | SRR1959398 | 2014 | 11 |    | Europe        | United Kingdom | Enteritidis             | Enteritidis | 1425  | 25453 |
| SAL_CA5724AA | 71397             | SRR1959396 | 2012 | 11 |    | Europe        | United Kingdom | Enteritidis             | Enteritidis | 1425  | 25451 |
| SAL_CA5730AA | 81176             | SRR1959390 | 2015 | 1  |    | Europe        | United Kingdom | Enteritidis             | Enteritidis | 1425  | 25446 |
| SAL_CA5731AA | 80346             | SRR1959389 | 2015 | 1  |    | Europe        | United Kingdom | Enteritidis             | Enteritidis | 1425  | 25445 |
| SAL_CA5734AA | 73611             | SRR1959386 | 2014 | 12 | 9  | Europe        | United Kingdom | Enteritidis             | Enteritidis | 1425  | 25442 |
| SAL_CA5742AA | 66462             | SRR1959366 | 2014 | 10 |    | Europe        | United Kingdom | Enteritidis             | Enteritidis | 1425  | 25437 |
| SAL_CA5747AA | 69747             | SRR1959361 | 2014 | 11 |    | Europe        | United Kingdom | Enteritidis             | Enteritidis | 1425  | 25432 |
| SAL_CA5751AA | 73528             | SRR1959321 | 2014 | 9  |    | Europe        | United Kingdom | Enteritidis             | Enteritidis | 3888  | 25428 |
| SAL_CA5752AA | 73573             | SRR1959320 | 2014 | 9  |    | Europe        | United Kingdom | Enteritidis             | Enteritidis | 3963  | 21198 |
| SAL_CA5757AA | 74326             | SRR1959315 | 2014 | 12 |    | Europe        | United Kingdom | Enteritidis             | Enteritidis | 1425  | 25424 |
| SAL_CA5760AA | 80361             | SRR1959312 | 2015 | 1  |    | Europe        | United Kingdom | Enteritidis             | Enteritidis | 1425  | 7117  |
| SAL_CA5774AA | 79083             | SRR1959298 | 2015 | 1  |    | Europe        | United Kingdom | Enteritidis             | Enteritidis | 1425  | 25411 |
| SAL_CA5778AA | 78742             | SRR1959294 | 2014 | 12 |    | Europe        | United Kingdom | Enteritidis             | Enteritidis | 1425  | 25407 |
| SAL_CA5782AA | 69740             | SRR1959290 | 2014 | 11 |    | Europe        | United Kingdom | Enteritidis             | Enteritidis | 1425  | 24936 |
| SAL_CA5783AA | 66881             | SRR1959289 | 2014 | 10 |    | Europe        | United Kingdom | Enteritidis             | Enteritidis | 1425  | 24563 |
| SAL_CA5784AA | 73559             | SRR1959288 | 2014 | 9  |    | Europe        | United Kingdom | Enteritidis             | Enteritidis | 1425  | 25403 |
| SAL_CA5787AA | 78727             | SRR1959285 | 2014 | 12 |    | Europe        | United Kingdom | Enteritidis             | Enteritidis | 1425  | 25400 |
| SAL_CA5791AA | 73641             | SRR1959281 | 2014 | 12 |    | Europe        | United Kingdom | Enteritidis             | Enteritidis | 1425  | 25396 |
| SAL_CA5793AA | 80349             | SRR1959279 | 2015 | 1  |    | Europe        | United Kingdom | Enteritidis             | Enteritidis | 3888  | 25394 |
| SAL_CA5797AA | 71394             | SRR1959275 | 2012 | 11 |    | Europe        | United Kingdom | Enteritidis             | Enteritidis | 1425  | 25391 |
| SAL_CA5799AA | 75668             | SRR1959273 | 2014 | 12 |    | Europe        | United Kingdom | Enteritidis             | Enteritidis | 1425  | 25389 |
| SAL_CA5800AA | 73640             | SRR1959272 | 2014 | 12 |    | Europe        | United Kingdom | Enteritidis             | Enteritidis | 1425  | 25388 |
| SAL_CA5802AA | 78660             | SRR1959270 | 2014 | 12 |    | Europe        | United Kingdom | Enteritidis             | Enteritidis | 3888  | 25386 |
| SAL_CA5803AA | 73536             | SRR1959269 | 2014 | 9  |    | Europe        | United Kingdom | Enteritidis             | Enteritidis | 1425  | 25385 |
| SAL_CA5814AA | 71400             | SRR1959258 | 2012 | 11 |    | Europe        | United Kingdom | Enteritidis             | Enteritidis | 1425  | 25375 |
| SAL_CA5818AA | 68874             | SRR1959254 | 2014 | 10 |    | Europe        | United Kingdom | Enteritidis             | Enteritidis | 1425  | 25372 |
| SAL_CA5829AA | 73582             | SRR1959243 | 2014 | 9  |    | Europe        | United Kingdom | Enteritidis             | Enteritidis | 1425  | 24690 |
| SAL_CA5843AA | 66492             | SRR1959229 | 2014 | 10 |    | Europe        | United Kingdom | Enteritidis             | Enteritidis | 1425  | 25348 |
| SAL_CA5845AA | 70667             | SRR1959227 | 2014 | 11 |    | Europe        | United Kingdom | Enteritidis             | Enteritidis | 1425  | 25341 |
| SAL_CA5846AA | 70657             | SRR1959226 | 2014 | 11 | 27 | Europe        | United Kingdom | Enteritidis             | Enteritidis | 1425  | 25347 |
| SAL_CA5850AA | 80307             | SRR1959222 | 2015 | 1  | 13 | Europe        | United Kingdom | Enteritidis             | Enteritidis | 1425  | 25345 |
| SAL_CA5854AA | 71574             | SRR1959217 | 2014 | 12 |    | Europe        | United Kingdom | Enteritidis             | Enteritidis | 1425  | 25341 |
| SAL_CA5860AA | IEH-NGS-SAL-02398 | SRR1958895 | 2014 | 4  |    | North America | United States  | Enteritidis (Predicted) | Enteritidis | 1425  | 25336 |
| SAL_CA5886AA | 46117             | SRR1958691 | 2014 | 8  |    | Europe        | United Kingdom | Enteritidis             | Enteritidis | 1425  | 25316 |
| SAL_CA5888AA | 50153             | SRR1958689 | 2014 | 9  |    | Europe        | United Kingdom | Enteritidis             | Enteritidis | 1425  | 25062 |
| SAL_CA5893AA | 49752             | SRR1958684 | 2014 | 9  |    | Europe        | United Kingdom | Enteritidis             | Enteritidis | 1425  | 25311 |
| SAL_CA5898AA | 66838             | SRR1958679 | 2014 | 9  |    | Europe        | United Kingdom | Enteritidis             | Enteritidis | 28005 | 25306 |
| SAL_CA5899AA | 49748             | SRR1958678 | 2014 | 9  |    | Europe        | United Kingdom | Enteritidis             | Enteritidis | 1425  | 25305 |
| SAL_CA5901AA | 60074             | SRR1958676 | 2014 | 10 | 9  | Europe        | United Kingdom | Enteritidis             | Enteritidis | 3888  | 7317  |
| SAL_CA5906AA | 54048             | SRR1958671 | 2014 | 9  |    | Europe        | United Kingdom | Enteritidis             | Enteritidis | 1425  | 25299 |
| SAL_CA5909AA | 62599             | SRR1958668 | 2014 | 10 |    | Europe        | United Kingdom | Enteritidis             | Enteritidis | 3888  | 25296 |
| SAL_CA5913AA | 46122             | SRR1958664 | 2014 | 8  | 29 | Europe        | United Kingdom | Enteritidis             | Enteritidis | 3961  | 25292 |
| SAL_CA5926AA | 48247             | SRR1958651 | 2014 | 9  |    | Europe        | United Kingdom | Enteritidis             | Enteritidis | 1425  | 25282 |
| SAL_CA5931AA | 62549             | SRR1958646 | 2014 | 9  |    | Europe        | United Kingdom | Enteritidis             | Enteritidis | 1425  | 25277 |
| SAL_CA5944AA | 66842             | SRR1958633 | 2014 | 9  |    | Europe        | United Kingdom | Enteritidis             | Enteritidis | 1425  | 25267 |
| SAL_CA5949AA | 63547             | SRR1958628 | 2014 | 10 |    | Europe        | United Kingdom | Enteritidis             | Enteritidis | 1425  | 25196 |
| SAL_CA5960AA | 62629             | SRR1958617 | 2014 | 11 |    | Europe        | United Kingdom | Enteritidis             | Enteritidis | 3888  | 25253 |
| SAL_CA5963AA | 62556             | SRR1958614 | 2014 | 8  | 29 | Europe        | United Kingdom | Enteritidis             | Enteritidis | 3888  | 25250 |
| SAL_CA5971AA | 50113             | SRR1958606 | 2014 | 9  |    | Europe        | United Kingdom | Enteritidis             | Enteritidis | 1425  | 25242 |
| SAL_CA5977AA | 48246             | SRR1958600 | 2014 | 9  |    | Europe        | United Kingdom | Enteritidis             | Enteritidis | 1425  | 25236 |

|              |       |            |      |    |           |                |                         |             |       |       |
|--------------|-------|------------|------|----|-----------|----------------|-------------------------|-------------|-------|-------|
| SAL_CA5980AA | 50112 | SRR1958597 | 2014 | 9  | Europe    | United Kingdom | Enteritidis             | Enteritidis | 1425  | 25233 |
| SAL_CA5982AA | 62600 | SRR1958595 | 2014 | 10 | Europe    | United Kingdom | Enteritidis             | Enteritidis | -9660 | 25231 |
| SAL_CA5983AA | 57643 | SRR1958594 | 2014 | 10 | Europe    | United Kingdom | Enteritidis             | Enteritidis | 1425  | 25230 |
| SAL_CA5992AA | 60374 | SRR1958585 | 2014 | 10 | Europe    | United Kingdom | Enteritidis             | Enteritidis | 1425  | 25223 |
| SAL_CA5993AA | 66480 | SRR1958584 | 2014 | 10 | Europe    | United Kingdom | Enteritidis (Predicted) | Enteritidis | 1425  | 25222 |
| SAL_CA5997AA | 48265 | SRR1958580 | 2014 | 9  | Europe    | United Kingdom | Enteritidis             | Enteritidis | 3888  | 25220 |
| SAL_CA5999AA | 50150 | SRR1958578 | 2014 | 9  | 24 Europe | United Kingdom | Enteritidis             | Enteritidis | 1425  | 25218 |
| SAL_CA6003AA | 62609 | SRR1958574 | 2014 | 10 | Europe    | United Kingdom | Enteritidis             | Enteritidis | 1425  | 25215 |
| SAL_CA6006AA | 62616 | SRR1958571 | 2014 | 10 | Europe    | United Kingdom | Enteritidis             | Enteritidis | 1425  | 25212 |
| SAL_CA6012AA | 63501 | SRR1958565 | 2014 | 9  | Europe    | United Kingdom | Enteritidis             | Enteritidis | 3888  | 25206 |
| SAL_CA6017AA | 60355 | SRR1958560 | 2014 | 9  | Europe    | United Kingdom | Enteritidis             | Enteritidis | 26493 | 25201 |
| SAL_CA6018AA | 54061 | SRR1958559 | 2014 | 9  | Europe    | United Kingdom | Enteritidis             | Enteritidis | 1425  | 25200 |
| SAL_CA6019AA | 48226 | SRR1958558 | 2014 | 9  | Europe    | United Kingdom | Enteritidis             | Enteritidis | 1425  | 25199 |
| SAL_CA6022AA | 62561 | SRR1958555 | 2014 | 9  | Europe    | United Kingdom | Enteritidis             | Enteritidis | 1425  | 25196 |
| SAL_CA6027AA | 63524 | SRR1958550 | 2014 | 10 | Europe    | United Kingdom | Enteritidis             | Enteritidis | 1425  | 25191 |
| SAL_CA6030AA | 60131 | SRR1958547 | 2014 | 10 | Europe    | United Kingdom | Enteritidis             | Enteritidis | 1425  | 25188 |
| SAL_CA6031AA | 46156 | SRR1958546 | 2014 | 8  | 19 Europe | United Kingdom | Enteritidis             | Enteritidis | 3888  | 25187 |
| SAL_CA6038AA | 54045 | SRR1958539 | 2014 | 9  | Europe    | United Kingdom | Enteritidis             | Enteritidis | 1425  | 25180 |
| SAL_CA6040AA | 49740 | SRR1958537 | 2014 | 9  | Europe    | United Kingdom | Enteritidis             | Enteritidis | 1425  | 25178 |
| SAL_CA6041AA | 57661 | SRR1958536 | 2014 | 10 | Europe    | United Kingdom | Enteritidis             | Enteritidis | 1425  | 25177 |
| SAL_CA6042AA | 48258 | SRR1958535 | 2014 | 9  | Europe    | United Kingdom | Enteritidis             | Enteritidis | 1425  | 25176 |
| SAL_CA6049AA | 49700 | SRR1958528 | 2014 | 9  | Europe    | United Kingdom | Enteritidis             | Enteritidis | 1425  | 25171 |
| SAL_CA6051AA | 62513 | SRR1958526 | 2014 | 10 | Europe    | United Kingdom | Enteritidis             | Enteritidis | 1425  | 25169 |
| SAL_CA6060AA | 49742 | SRR1958517 | 2014 | 9  | Europe    | United Kingdom | Enteritidis             | Enteritidis | 3963  | 25161 |
| SAL_CA6061AA | 64967 | SRR1958516 | 2014 | 11 | Europe    | United Kingdom | Enteritidis (Predicted) | Enteritidis | 1425  | 24834 |
| SAL_CA6066AA | 54021 | SRR1958511 | 2014 | 9  | Europe    | United Kingdom | Enteritidis             | Enteritidis | 1425  | 25156 |
| SAL_CA6067AA | 60068 | SRR1958510 | 2014 | 10 | Europe    | United Kingdom | Enteritidis             | Enteritidis | 1425  | 24842 |
| SAL_CA6073AA | 60382 | SRR1958504 | 2014 | 10 | 7 Europe  | United Kingdom | Enteritidis             | Enteritidis | 3888  | 7317  |
| SAL_CA6083AA | 50152 | SRR1958494 | 2014 | 9  | Europe    | United Kingdom | Enteritidis             | Enteritidis | 1425  | 25143 |
| SAL_CA6084AA | 62550 | SRR1958493 | 2014 | 9  | Europe    | United Kingdom | Enteritidis             | Enteritidis | 1425  | 25142 |
| SAL_CA6087AA | 49745 | SRR1958490 | 2014 | 9  | Europe    | United Kingdom | Enteritidis             | Enteritidis | 1425  | 25139 |
| SAL_CA6088AA | 54052 | SRR1958489 | 2014 | 9  | Europe    | United Kingdom | Enteritidis             | Enteritidis | 1425  | 25138 |
| SAL_CA6091AA | 46148 | SRR1958486 | 2014 | 9  | Europe    | United Kingdom | Enteritidis             | Enteritidis | 1425  | 25135 |
| SAL_CA6098AA | 63557 | SRR1958479 | 2014 | 10 | Europe    | United Kingdom | Enteritidis             | Enteritidis | 3888  | 25129 |
| SAL_CA6117AA | 62554 | SRR1958460 | 2014 | 8  | 24 Europe | United Kingdom | Enteritidis             | Enteritidis | 3888  | 25112 |
| SAL_CA6123AA | 63516 | SRR1958454 | 2014 | 10 | Europe    | United Kingdom | Enteritidis             | Enteritidis | 1425  | 25107 |
| SAL_CA6129AA | 60364 | SRR1958448 | 2014 | 10 | Europe    | United Kingdom | Enteritidis             | Enteritidis | 1425  | 24842 |
| SAL_CA6142AA | 50149 | SRR1958435 | 2014 | 9  | Europe    | United Kingdom | Enteritidis             | Enteritidis | 1425  | 25091 |
| SAL_CA6146AA | 63510 | SRR1958431 | 2014 | 10 | Europe    | United Kingdom | Enteritidis             | Enteritidis | 1425  | 25087 |
| SAL_CA6147AA | 60375 | SRR1958430 | 2014 | 10 | Europe    | United Kingdom | Enteritidis             | Enteritidis | 3888  | 3621  |
| SAL_CA6148AA | 50111 | SRR1958429 | 2014 | 9  | Europe    | United Kingdom | Enteritidis             | Enteritidis | 1425  | 25086 |
| SAL_CA6149AA | 62558 | SRR1958428 | 2014 | 9  | Europe    | United Kingdom | Enteritidis             | Enteritidis | 3906  | 25085 |
| SAL_CA6150AA | 46123 | SRR1958427 | 2014 | 8  | Europe    | United Kingdom | Enteritidis             | Enteritidis | 1425  | 25084 |
| SAL_CA6151AA | 50147 | SRR1958426 | 2014 | 9  | Europe    | United Kingdom | Enteritidis             | Enteritidis | 1425  | 25083 |
| SAL_CA6153AA | 63542 | SRR1958424 | 2014 | 10 | Europe    | United Kingdom | Enteritidis             | Enteritidis | 3888  | 25081 |
| SAL_CA6155AA | 54039 | SRR1958422 | 2014 | 9  | Europe    | United Kingdom | Enteritidis             | Enteritidis | 1425  | 25079 |
| SAL_CA6156AA | 50161 | SRR1958421 | 2014 | 9  | Europe    | United Kingdom | Enteritidis             | Enteritidis | 3888  | 25078 |
| SAL_CA6158AA | 60127 | SRR1958419 | 2014 | 10 | Europe    | United Kingdom | Enteritidis             | Enteritidis | 1425  | 25076 |
| SAL_CA6163AA | 53985 | SRR1958414 | 2014 | 9  | Europe    | United Kingdom | Enteritidis             | Enteritidis | 1425  | 25072 |
| SAL_CA6164AA | 62553 | SRR1958413 | 2014 | 9  | Europe    | United Kingdom | Enteritidis             | Enteritidis | 1425  | 25071 |
| SAL_CA6168AA | 46150 | SRR1958409 | 2014 | 9  | Europe    | United Kingdom | Enteritidis             | Enteritidis | 1425  | 25067 |
| SAL_CA6174AA | 63536 | SRR1958403 | 2014 | 10 | Europe    | United Kingdom | Enteritidis             | Enteritidis | 1425  | 25062 |
| SAL_CA6179AA | 60065 | SRR1958398 | 2014 | 10 | Europe    | United Kingdom | Enteritidis             | Enteritidis | 1425  | 25057 |
| SAL_CA6180AA | 50160 | SRR1958397 | 2014 | 9  | Europe    | United Kingdom | Enteritidis             | Enteritidis | 1425  | 25056 |
| SAL_CA6187AA | 59992 | SRR1958390 | 2014 | 9  | Europe    | United Kingdom | Enteritidis             | Enteritidis | 1425  | 25049 |
| SAL_CA6192AA | 54030 | SRR1958385 | 2014 | 9  | Europe    | United Kingdom | Enteritidis             | Enteritidis | 1425  | 25044 |
| SAL_CA6195AA | 49703 | SRR1958382 | 2014 | 9  | Europe    | United Kingdom | Enteritidis             | Enteritidis | 1425  | 25041 |
| SAL_CA6196AA | 63513 | SRR1958381 | 2014 | 9  | Europe    | United Kingdom | Enteritidis             | Enteritidis | 1425  | 25004 |
| SAL_CA6198AA | 46617 | SRR1958379 | 2014 | 7  | Europe    | United Kingdom | Enteritidis             | Enteritidis | 1425  | 25039 |

|              |       |            |      |    |           |                |             |             |       |       |
|--------------|-------|------------|------|----|-----------|----------------|-------------|-------------|-------|-------|
| SAL_CA6204AA | 60086 | SRR1958373 | 2014 | 10 | Europe    | United Kingdom | Enteritidis | Enteritidis | 1425  | 25034 |
| SAL_CA6208AA | 60004 | SRR1958369 | 2014 | 10 | Europe    | United Kingdom | Enteritidis | Enteritidis | 3906  | 25030 |
| SAL_CA6209AA | 62539 | SRR1958368 | 2014 | 10 | Europe    | United Kingdom | Enteritidis | Enteritidis | 1425  | 25029 |
| SAL_CA6210AA | 49696 | SRR1958367 | 2014 | 9  | Europe    | United Kingdom | Enteritidis | Enteritidis | 1425  | 25028 |
| SAL_CA6213AA | 46151 | SRR1958364 | 2014 | 9  | Europe    | United Kingdom | Enteritidis | Enteritidis | 1425  | 25025 |
| SAL_CA6216AA | 60071 | SRR1958361 | 2014 | 10 | Europe    | United Kingdom | Enteritidis | Enteritidis | 1425  | 25023 |
| SAL_CA6230AA | 58531 | SRR1958347 | 2014 | 10 | Europe    | United Kingdom | Enteritidis | Enteritidis | 1425  | 25011 |
| SAL_CA6239AA | 63538 | SRR1958338 | 2014 | 10 | Europe    | United Kingdom | Enteritidis | Enteritidis | 1425  | 25004 |
| SAL_CA6245AA | 46146 | SRR1958332 | 2014 | 9  | Europe    | United Kingdom | Enteritidis | Enteritidis | 1425  | 24999 |
| SAL_CA6248AA | 46614 | SRR1958329 | 2014 | 7  | Europe    | United Kingdom | Enteritidis | Enteritidis | 3888  | 24996 |
| SAL_CA6252AA | 54060 | SRR1958325 | 2014 | 9  | 25 Europe | United Kingdom | Enteritidis | Enteritidis | 28412 | 24992 |
| SAL_CA6253AA | 49741 | SRR1958324 | 2014 | 9  | Europe    | United Kingdom | Enteritidis | Enteritidis | 3888  | 24991 |
| SAL_CA6256AA | 57626 | SRR1958321 | 2014 | 8  | Europe    | United Kingdom | Enteritidis | Enteritidis | 1425  | 24988 |
| SAL_CA6263AA | 60363 | SRR1958314 | 2014 | 10 | Europe    | United Kingdom | Enteritidis | Enteritidis | 1425  | 24982 |
| SAL_CA6267AA | 57627 | SRR1958310 | 2014 | 10 | Europe    | United Kingdom | Enteritidis | Enteritidis | 1425  | 24978 |
| SAL_CA6268AA | 60381 | SRR1958309 | 2014 | 10 | Europe    | United Kingdom | Enteritidis | Enteritidis | 1425  | 24977 |
| SAL_CA6270AA | 48282 | SRR1958307 | 2014 | 9  | Europe    | United Kingdom | Enteritidis | Enteritidis | 1425  | 6917  |
| SAL_CA6272AA | 49746 | SRR1958305 | 2014 | 9  | Europe    | United Kingdom | Enteritidis | Enteritidis | 1425  | 24974 |
| SAL_CA6282AA | 53986 | SRR1958295 | 2014 | 9  | Europe    | United Kingdom | Enteritidis | Enteritidis | 1425  | 24965 |
| SAL_CA6284AA | 48240 | SRR1958293 | 2014 | 9  | Europe    | United Kingdom | Enteritidis | Enteritidis | 1425  | 24963 |
| SAL_CA6287AA | 48250 | SRR1958290 | 2014 | 9  | Europe    | United Kingdom | Enteritidis | Enteritidis | 1425  | 24690 |
| SAL_CA6293AA | 48224 | SRR1958284 | 2014 | 9  | Europe    | United Kingdom | Enteritidis | Enteritidis | 1425  | 24956 |
| SAL_CA6295AA | 60138 | SRR1958282 | 2014 | 10 | Europe    | United Kingdom | Enteritidis | Enteritidis | 1425  | 24954 |
| SAL_CA6297AA | 66845 | SRR1958280 | 2014 | 10 | 13 Europe | United Kingdom | Enteritidis | Enteritidis | 3888  | 7317  |
| SAL_CA6302AA | 62559 | SRR1958275 | 2014 | 9  | Europe    | United Kingdom | Enteritidis | Enteritidis | 1425  | 2222  |
| SAL_CA6305AA | 62610 | SRR1958272 | 2014 | 10 | 30 Europe | United Kingdom | Enteritidis | Enteritidis | 3888  | 24946 |
| SAL_CA6307AA | 46613 | SRR1958270 | 2014 | 7  | Europe    | United Kingdom | Enteritidis | Enteritidis | 3888  | 24944 |
| SAL_CA6308AA | 48235 | SRR1958269 | 2014 | 9  | Europe    | United Kingdom | Enteritidis | Enteritidis | 1425  | 24943 |
| SAL_CA6309AA | 48248 | SRR1958268 | 2014 | 9  | Europe    | United Kingdom | Enteritidis | Enteritidis | 3888  | 24942 |
| SAL_CA6313AA | 46119 | SRR1958264 | 2014 | 8  | Europe    | United Kingdom | Enteritidis | Enteritidis | 3888  | 24938 |
| SAL_CA6315AA | 60378 | SRR1958262 | 2014 | 10 | Europe    | United Kingdom | Enteritidis | Enteritidis | 1425  | 24936 |
| SAL_CA6323AA | 50107 | SRR1958254 | 2014 | 9  | Europe    | United Kingdom | Enteritidis | Enteritidis | 1425  | 24928 |
| SAL_CA6324AA | 66469 | SRR1958253 | 2014 | 9  | Europe    | United Kingdom | Enteritidis | Enteritidis | 3888  | 24927 |
| SAL_CA6325AA | 63509 | SRR1958252 | 2014 | 10 | Europe    | United Kingdom | Enteritidis | Enteritidis | 1425  | 24766 |
| SAL_CA6326AA | 66477 | SRR1958251 | 2014 | 10 | Europe    | United Kingdom | Enteritidis | Enteritidis | 1425  | 24926 |
| SAL_CA6335AA | 48254 | SRR1958242 | 2014 | 9  | Europe    | United Kingdom | Enteritidis | Enteritidis | 1425  | 24917 |
| SAL_CA6341AA | 62580 | SRR1958236 | 2014 | 9  | Europe    | United Kingdom | Enteritidis | Enteritidis | 1425  | 24913 |
| SAL_CA6342AA | 46149 | SRR1958235 | 2014 | 9  | Europe    | United Kingdom | Enteritidis | Enteritidis | 1425  | 24912 |
| SAL_CA6347AA | 53991 | SRR1958230 | 2014 | 9  | Europe    | United Kingdom | Enteritidis | Enteritidis | 1425  | 24907 |
| SAL_CA6351AA | 66862 | SRR1958226 | 2014 | 10 | Europe    | United Kingdom | Enteritidis | Enteritidis | 26483 | 24903 |
| SAL_CA6358AA | 57641 | SRR1958219 | 2014 | 9  | 26 Europe | United Kingdom | Enteritidis | Enteritidis | 3888  | 7317  |
| SAL_CA6369AA | 50158 | SRR1958208 | 2014 | 9  | 20 Europe | United Kingdom | Enteritidis | Enteritidis | 3888  | 2066  |
| SAL_CA6373AA | 62583 | SRR1958204 | 2014 | 9  | Europe    | United Kingdom | Enteritidis | Enteritidis | 1425  | 24884 |
| SAL_CA6379AA | 62625 | SRR1958198 | 2014 | 11 | Europe    | United Kingdom | Enteritidis | Enteritidis | 1425  | 24879 |
| SAL_CA6381AA | 60379 | SRR1958196 | 2014 | 10 | Europe    | United Kingdom | Enteritidis | Enteritidis | 3906  | 24877 |
| SAL_CA6387AA | 57650 | SRR1958190 | 2014 | 10 | Europe    | United Kingdom | Enteritidis | Enteritidis | 1425  | 24871 |
| SAL_CA6390AA | 63532 | SRR1958187 | 2014 | 10 | Europe    | United Kingdom | Enteritidis | Enteritidis | 1425  | 24868 |
| SAL_CA6396AA | 63568 | SRR1958180 | 2014 | 9  | Europe    | United Kingdom | Enteritidis | Enteritidis | 3888  | 24864 |
| SAL_CA6406AA | 46128 | SRR1958164 | 2014 | 8  | 29 Europe | United Kingdom | Enteritidis | Enteritidis | 1425  | 24854 |
| SAL_CA6408AA | 63570 | SRR1958162 | 2014 | 9  | Europe    | United Kingdom | Enteritidis | Enteritidis | 1425  | 24852 |
| SAL_CA6414AA | 46627 | SRR1958156 | 2014 | 7  | Europe    | United Kingdom | Enteritidis | Enteritidis | 1425  | 24848 |
| SAL_CA6418AA | 48243 | SRR1958152 | 2014 | 9  | 15 Europe | United Kingdom | Enteritidis | Enteritidis | 26493 | 24844 |
| SAL_CA6420AA | 63528 | SRR1958150 | 2014 | 10 | Europe    | United Kingdom | Enteritidis | Enteritidis | 1425  | 24842 |
| SAL_CA6426AA | 46630 | SRR1958144 | 2014 | 7  | Europe    | United Kingdom | Enteritidis | Enteritidis | 1425  | 24836 |
| SAL_CA6428AA | 64957 | SRR1958142 | 2014 | 11 | Europe    | United Kingdom | Enteritidis | Enteritidis | 1425  | 24834 |
| SAL_CA6433AA | 63523 | SRR1958137 | 2014 | 10 | Europe    | United Kingdom | Enteritidis | Enteritidis | 1425  | 24829 |
| SAL_CA6434AA | 63518 | SRR1958136 | 2014 | 10 | Europe    | United Kingdom | Enteritidis | Enteritidis | 1425  | 24766 |
| SAL_CA6435AA | 49738 | SRR1958135 | 2014 | 9  | Europe    | United Kingdom | Enteritidis | Enteritidis | 1425  | 24828 |
| SAL_CA6436AA | 62511 | SRR1958134 | 2014 | 10 | Europe    | United Kingdom | Enteritidis | Enteritidis | 1425  | 24827 |

|              |       |            |      |    |    |        |                |             |             |      |       |
|--------------|-------|------------|------|----|----|--------|----------------|-------------|-------------|------|-------|
| SAL_CA6439AA | 48206 | SRR1958131 | 2014 | 9  | 4  | Europe | United Kingdom | Enteritidis | Enteritidis | 3888 | 24824 |
| SAL_CA6440AA | 50155 | SRR1958130 | 2014 | 9  |    | Europe | United Kingdom | Enteritidis | Enteritidis | 1425 | 24823 |
| SAL_CA6441AA | 50157 | SRR1958129 | 2014 | 9  |    | Europe | United Kingdom | Enteritidis | Enteritidis | 3888 | 24822 |
| SAL_CA6449AA | 66859 | SRR1958121 | 2014 | 10 | 24 | Europe | United Kingdom | Enteritidis | Enteritidis | 1425 | 24816 |
| SAL_CA6451AA | 50154 | SRR1958119 | 2014 | 9  |    | Europe | United Kingdom | Enteritidis | Enteritidis | 1425 | 24814 |
| SAL_CA6452AA | 58514 | SRR1958118 | 2014 | 10 |    | Europe | United Kingdom | Enteritidis | Enteritidis | 1425 | 24813 |
| SAL_CA6453AA | 46612 | SRR1958117 | 2014 | 7  |    | Europe | United Kingdom | Enteritidis | Enteritidis | 1425 | 24812 |
| SAL_CA6455AA | 49750 | SRR1958115 | 2014 | 9  |    | Europe | United Kingdom | Enteritidis | Enteritidis | 1425 | 24810 |
| SAL_CA6457AA | 50110 | SRR1958113 | 2014 | 9  |    | Europe | United Kingdom | Enteritidis | Enteritidis | 1425 | 24808 |
| SAL_CA6462AA | 62548 | SRR1958108 | 2014 | 9  |    | Europe | United Kingdom | Enteritidis | Enteritidis | 3888 | 24804 |
| SAL_CA6464AA | 50128 | SRR1958106 | 2014 | 9  |    | Europe | United Kingdom | Enteritidis | Enteritidis | 1425 | 24802 |
| SAL_CA6467AA | 63519 | SRR1958103 | 2014 | 10 |    | Europe | United Kingdom | Enteritidis | Enteritidis | 1425 | 18562 |
| SAL_CA6468AA | 64951 | SRR1958102 | 2014 | 11 |    | Europe | United Kingdom | Enteritidis | Enteritidis | 1425 | 24799 |
| SAL_CA6473AA | 63541 | SRR1958097 | 2014 | 10 |    | Europe | United Kingdom | Enteritidis | Enteritidis | 1425 | 24794 |
| SAL_CA6475AA | 60133 | SRR1958095 | 2014 | 10 |    | Europe | United Kingdom | Enteritidis | Enteritidis | 1425 | 24792 |
| SAL_CA6478AA | 48214 | SRR1958092 | 2014 | 9  |    | Europe | United Kingdom | Enteritidis | Enteritidis | 1425 | 24789 |
| SAL_CA6481AA | 49743 | SRR1958089 | 2014 | 9  |    | Europe | United Kingdom | Enteritidis | Enteritidis | 3963 | 24786 |
| SAL_CA6482AA | 58464 | SRR1958088 | 2014 | 9  |    | Europe | United Kingdom | Enteritidis | Enteritidis | 1425 | 24785 |
| SAL_CA6493AA | 63530 | SRR1958077 | 2014 | 9  |    | Europe | United Kingdom | Enteritidis | Enteritidis | 1425 | 24775 |
| SAL_CA6494AA | 62495 | SRR1958076 | 2014 | 9  |    | Europe | United Kingdom | Enteritidis | Enteritidis | 1425 | 24774 |
| SAL_CA6496AA | 46124 | SRR1958074 | 2014 | 8  |    | Europe | United Kingdom | Enteritidis | Enteritidis | 1425 | 24772 |
| SAL_CA6502AA | 66488 | SRR1958068 | 2014 | 10 |    | Europe | United Kingdom | Enteritidis | Enteritidis | 1425 | 24766 |
| SAL_CA6503AA | 62552 | SRR1958067 | 2014 | 9  |    | Europe | United Kingdom | Enteritidis | Enteritidis | 3888 | 24765 |
| SAL_CA6505AA | 57648 | SRR1958065 | 2014 | 10 |    | Europe | United Kingdom | Enteritidis | Enteritidis | 3888 | 404   |
| SAL_CA6506AA | 60134 | SRR1958064 | 2014 | 10 |    | Europe | United Kingdom | Enteritidis | Enteritidis | 1425 | 24707 |
| SAL_CA6510AA | 60129 | SRR1958060 | 2014 | 10 |    | Europe | United Kingdom | Enteritidis | Enteritidis | 1425 | 16120 |
| SAL_CA6517AA | 57623 | SRR1958052 | 2014 | 8  | 8  | Europe | United Kingdom | Enteritidis | Enteritidis | 3888 | 2066  |
| SAL_CA6518AA | 48208 | SRR1958051 | 2014 | 9  |    | Europe | United Kingdom | Enteritidis | Enteritidis | 1425 | 24755 |
| SAL_CA6523AA | 63533 | SRR1958046 | 2014 | 9  |    | Europe | United Kingdom | Enteritidis | Enteritidis | 1425 | 24750 |
| SAL_CA6526AA | 66839 | SRR1958043 | 2014 | 9  |    | Europe | United Kingdom | Enteritidis | Enteritidis | 3888 | 24747 |
| SAL_CA6529AA | 48229 | SRR1958040 | 2014 | 9  |    | Europe | United Kingdom | Enteritidis | Enteritidis | 1425 | 24744 |
| SAL_CA6534AA | 66473 | SRR1958035 | 2014 | 10 |    | Europe | United Kingdom | Enteritidis | Enteritidis | 7811 | 24739 |
| SAL_CA6536AA | 50109 | SRR1958033 | 2014 | 9  | 16 | Europe | United Kingdom | Enteritidis | Enteritidis | 3888 | 24738 |
| SAL_CA6541AA | 46085 | SRR1958028 | 2014 | 8  | 19 | Europe | United Kingdom | Enteritidis | Enteritidis | 3888 | 24732 |
| SAL_CA6542AA | 49739 | SRR1958027 | 2014 | 9  |    | Europe | United Kingdom | Enteritidis | Enteritidis | 1425 | 24731 |
| SAL_CA6546AA | 62591 | SRR1958023 | 2014 | 10 |    | Europe | United Kingdom | Enteritidis | Enteritidis | 1425 | 24727 |
| SAL_CA6547AA | 60377 | SRR1958022 | 2014 | 10 |    | Europe | United Kingdom | Enteritidis | Enteritidis | 1425 | 24726 |
| SAL_CA6550AA | 50159 | SRR1958018 | 2014 | 9  |    | Europe | United Kingdom | Enteritidis | Enteritidis | 1425 | 24723 |
| SAL_CA6551AA | 54056 | SRR1958017 | 2014 | 9  |    | Europe | United Kingdom | Enteritidis | Enteritidis | 1425 | 24722 |
| SAL_CA6557AA | 58510 | SRR1958011 | 2014 | 10 | 2  | Europe | United Kingdom | Enteritidis | Enteritidis | 3888 | 7317  |
| SAL_CA6568AA | 63527 | SRR1958000 | 2014 | 10 |    | Europe | United Kingdom | Enteritidis | Enteritidis | 1425 | 24707 |
| SAL_CA6575AA | 63521 | SRR1957993 | 2014 | 9  |    | Europe | United Kingdom | Enteritidis | Enteritidis | 1425 | 24700 |
| SAL_CA6580AA | 46152 | SRR1957988 | 2014 | 9  |    | Europe | United Kingdom | Enteritidis | Enteritidis | 1425 | 24695 |
| SAL_CA6582AA | 46118 | SRR1957986 | 2014 | 8  | 20 | Europe | United Kingdom | Enteritidis | Enteritidis | 3888 | 24693 |
| SAL_CA6585AA | 58530 | SRR1957983 | 2014 | 10 |    | Europe | United Kingdom | Enteritidis | Enteritidis | 1425 | 24690 |
| SAL_CA6587AA | 48253 | SRR1957981 | 2014 | 9  |    | Europe | United Kingdom | Enteritidis | Enteritidis | 1425 | 24688 |
| SAL_CA6589AA | 60062 | SRR1957979 | 2014 | 10 |    | Europe | United Kingdom | Enteritidis | Enteritidis | 3888 | 24686 |
| SAL_CA6590AA | 54027 | SRR1957978 | 2014 | 9  |    | Europe | United Kingdom | Enteritidis | Enteritidis | 1425 | 24685 |
| SAL_CA6592AA | 54043 | SRR1957976 | 2014 | 9  |    | Europe | United Kingdom | Enteritidis | Enteritidis | 1425 | 24683 |
| SAL_CA6593AA | 49704 | SRR1957975 | 2014 | 9  |    | Europe | United Kingdom | Enteritidis | Enteritidis | 1425 | 24682 |
| SAL_CA6594AA | 62585 | SRR1957974 | 2014 | 10 |    | Europe | United Kingdom | Enteritidis | Enteritidis | 3906 | 24681 |
| SAL_CA6599AA | 49697 | SRR1957969 | 2014 | 9  |    | Europe | United Kingdom | Enteritidis | Enteritidis | 1425 | 24676 |
| SAL_CA6601AA | 60136 | SRR1957967 | 2014 | 10 |    | Europe | United Kingdom | Enteritidis | Enteritidis | 1425 | 24674 |
| SAL_CA6610AA | 59995 | SRR1957958 | 2014 | 10 |    | Europe | United Kingdom | Enteritidis | Enteritidis | 1425 | 24666 |
| SAL_CA6617AA | 60140 | SRR1957951 | 2014 | 10 |    | Europe | United Kingdom | Enteritidis | Enteritidis | 1425 | 24660 |
| SAL_CA6618AA | 58477 | SRR1957950 | 2014 | 9  |    | Europe | United Kingdom | Enteritidis | Enteritidis | 1425 | 24659 |
| SAL_CA6619AA | 60376 | SRR1957949 | 2014 | 10 |    | Europe | United Kingdom | Enteritidis | Enteritidis | 1425 | 24653 |
| SAL_CA6626AA | 63549 | SRR1957942 | 2014 | 10 |    | Europe | United Kingdom | Enteritidis | Enteritidis | 1425 | 24652 |
| SAL_CA6629AA | 57672 | SRR1957939 | 2014 | 8  |    | Europe | United Kingdom | Enteritidis | Enteritidis | 1425 | 24649 |



|              |       |            |      |    |    |        |                |             |             |       |       |
|--------------|-------|------------|------|----|----|--------|----------------|-------------|-------------|-------|-------|
| SAL_CA6635AA | 62551 | SRR1957933 | 2014 | 9  | 3  | Europe | United Kingdom | Enteritidis | Enteritidis | 1425  | 24643 |
| SAL_CA6647AA | 48255 | SRR1957921 | 2014 | 9  |    | Europe | United Kingdom | Enteritidis | Enteritidis | 3888  | 24631 |
| SAL_CA6650AA | 49749 | SRR1957918 | 2014 | 9  |    | Europe | United Kingdom | Enteritidis | Enteritidis | 1425  | 24629 |
| SAL_CA6654AA | 54020 | SRR1957914 | 2014 | 9  |    | Europe | United Kingdom | Enteritidis | Enteritidis | 1425  | 24625 |
| SAL_CA6657AA | 60125 | SRR1957911 | 2014 | 10 |    | Europe | United Kingdom | Enteritidis | Enteritidis | 1425  | 24622 |
| SAL_CA6661AA | 46631 | SRR1957907 | 2014 | 7  |    | Europe | United Kingdom | Enteritidis | Enteritidis | 1425  | 24618 |
| SAL_CA6664AA | 62617 | SRR1957904 | 2014 | 10 |    | Europe | United Kingdom | Enteritidis | Enteritidis | 1425  | 24616 |
| SAL_CA6670AA | 54007 | SRR1957898 | 2014 | 9  |    | Europe | United Kingdom | Enteritidis | Enteritidis | 1425  | 24611 |
| SAL_CA6675AA | 50129 | SRR1957893 | 2014 | 9  |    | Europe | United Kingdom | Enteritidis | Enteritidis | 1425  | 24605 |
| SAL_CA6680AA | 48262 | SRR1957888 | 2014 | 9  | 5  | Europe | United Kingdom | Enteritidis | Enteritidis | 3888  | 24601 |
| SAL_CA6689AA | 66471 | SRR1957879 | 2014 | 10 |    | Europe | United Kingdom | Enteritidis | Enteritidis | 1425  | 6917  |
| SAL_CA6691AA | 62581 | SRR1957877 | 2014 | 8  | 27 | Europe | United Kingdom | Enteritidis | Enteritidis | 3888  | 24591 |
| SAL_CA6693AA | 57629 | SRR1957875 | 2014 | 10 |    | Europe | United Kingdom | Enteritidis | Enteritidis | 3888  | 24589 |
| SAL_CA6695AA | 46126 | SRR1957873 | 2014 | 8  |    | Europe | United Kingdom | Enteritidis | Enteritidis | 1425  | 24587 |
| SAL_CA6696AA | 62594 | SRR1957872 | 2014 | 10 |    | Europe | United Kingdom | Enteritidis | Enteritidis | 1425  | 24586 |
| SAL_CA6703AA | 54054 | SRR1957865 | 2014 | 9  |    | Europe | United Kingdom | Enteritidis | Enteritidis | 1425  | 24580 |
| SAL_CA6704AA | 62555 | SRR1957864 | 2014 | 9  |    | Europe | United Kingdom | Enteritidis | Enteritidis | 1425  | 24579 |
| SAL_CA6705AA | 46132 | SRR1957863 | 2014 | 8  | 29 | Europe | United Kingdom | Enteritidis | Enteritidis | 26449 | 24578 |
| SAL_CA6715AA | 49744 | SRR1957853 | 2014 | 9  | 23 | Europe | United Kingdom | Enteritidis | Enteritidis | 1425  | 24569 |
| SAL_CA6716AA | 62574 | SRR1957852 | 2014 | 9  | 1  | Europe | United Kingdom | Enteritidis | Enteritidis | 3888  | 24568 |
| SAL_CA6721AA | 62619 | SRR1957847 | 2014 | 11 |    | Europe | United Kingdom | Enteritidis | Enteritidis | 1425  | 24563 |
| SAL_CA6726AA | 62582 | SRR1957842 | 2014 | 9  | 2  | Europe | United Kingdom | Enteritidis | Enteritidis | 3888  | 24558 |
| SAL_CA6738AA | 66449 | SRR1957830 | 2014 | 10 |    | Europe | United Kingdom | Enteritidis | Enteritidis | 1425  | 24547 |
| SAL_CA6742AA | 60373 | SRR1957826 | 2014 | 10 |    | Europe | United Kingdom | Enteritidis | Enteritidis | 1425  | 24544 |
| SAL_CA6746AA | 62557 | SRR1957822 | 2014 | 9  |    | Europe | United Kingdom | Enteritidis | Enteritidis | 27926 | 24540 |
| SAL_CA6748AA | 49751 | SRR1957820 | 2014 | 9  | 15 | Europe | United Kingdom | Enteritidis | Enteritidis | 3888  | 24538 |
| SAL_CA6754AA | 45262 | SRR1957814 | 2014 | 9  | 1  | Europe | United Kingdom | Enteritidis | Enteritidis | 3888  | 24533 |
| SAL_CA6756AA | 44743 | SRR1957812 | 2014 | 9  |    | Europe | United Kingdom | Enteritidis | Enteritidis | 1425  | 24531 |
| SAL_CA6757AA | 44725 | SRR1957811 | 2014 | 9  |    | Europe | United Kingdom | Enteritidis | Enteritidis | 1425  | 24530 |
| SAL_CA6759AA | 44692 | SRR1957809 | 2014 | 9  | 8  | Europe | United Kingdom | Enteritidis | Enteritidis | 1425  | 15673 |
| SAL_CA6760AA | 44744 | SRR1957808 | 2014 | 9  |    | Europe | United Kingdom | Enteritidis | Enteritidis | 1425  | 24528 |
| SAL_CA6766AA | 44739 | SRR1957802 | 2014 | 9  |    | Europe | United Kingdom | Enteritidis | Enteritidis | 1425  | 24522 |
| SAL_CA6773AA | 44757 | SRR1957795 | 2014 | 9  |    | Europe | United Kingdom | Enteritidis | Enteritidis | 1425  | 24515 |
| SAL_CA6774AA | 44756 | SRR1957794 | 2014 | 9  |    | Europe | United Kingdom | Enteritidis | Enteritidis | 3888  | 24514 |
| SAL_CA6776AA | 44689 | SRR1957792 | 2014 | 9  |    | Europe | United Kingdom | Enteritidis | Enteritidis | 1425  | 24512 |
| SAL_CA6778AA | 44753 | SRR1957790 | 2014 | 9  |    | Europe | United Kingdom | Enteritidis | Enteritidis | 1425  | 24510 |
| SAL_CA6780AA | 44723 | SRR1957788 | 2014 | 9  |    | Europe | United Kingdom | Enteritidis | Enteritidis | 3888  | 24508 |
| SAL_CA6782AA | 44730 | SRR1957786 | 2014 | 9  |    | Europe | United Kingdom | Enteritidis | Enteritidis | 1425  | 24506 |
| SAL_CA6786AA | 44726 | SRR1957782 | 2014 | 9  |    | Europe | United Kingdom | Enteritidis | Enteritidis | 1425  | 24502 |
| SAL_CA6787AA | 44737 | SRR1957781 | 2014 | 9  |    | Europe | United Kingdom | Enteritidis | Enteritidis | 1425  | 24501 |
| SAL_CA6788AA | 44752 | SRR1957780 | 2014 | 9  |    | Europe | United Kingdom | Enteritidis | Enteritidis | 3888  | 24500 |
| SAL_CA6791AA | 44741 | SRR1957777 | 2014 | 9  |    | Europe | United Kingdom | Enteritidis | Enteritidis | 1425  | 24497 |
| SAL_CA6794AA | 44683 | SRR1957774 | 2014 | 8  | 29 | Europe | United Kingdom | Enteritidis | Enteritidis | 3888  | 24493 |
| SAL_CA6797AA | 44750 | SRR1957771 | 2014 | 9  |    | Europe | United Kingdom | Enteritidis | Enteritidis | 1425  | 24492 |
| SAL_CA6798AA | 46604 | SRR1957770 | 2014 | 6  |    | Europe | United Kingdom | Enteritidis | Enteritidis | 1425  | 24491 |
| SAL_CA6801AA | 44751 | SRR1957767 | 2014 | 9  |    | Europe | United Kingdom | Enteritidis | Enteritidis | 1425  | 24488 |
| SAL_CA6802AA | 46147 | SRR1957766 | 2014 | 9  |    | Europe | United Kingdom | Enteritidis | Enteritidis | 1425  | 24487 |
| SAL_CA6805AA | 44738 | SRR1957763 | 2014 | 9  |    | Europe | United Kingdom | Enteritidis | Enteritidis | 3888  | 24485 |
| SAL_CA6806AA | 44746 | SRR1957762 | 2014 | 9  |    | Europe | United Kingdom | Enteritidis | Enteritidis | 3888  | 24484 |
| SAL_CA6807AA | 44734 | SRR1957761 | 2014 | 9  |    | Europe | United Kingdom | Enteritidis | Enteritidis | 1425  | 24483 |
| SAL_CA6810AA | 44754 | SRR1957758 | 2014 | 9  |    | Europe | United Kingdom | Enteritidis | Enteritidis | 3888  | 24480 |
| SAL_CA6811AA | 46607 | SRR1957757 | 2014 | 6  |    | Europe | United Kingdom | Enteritidis | Enteritidis | 3888  | 24479 |
| SAL_CA6813AA | 44736 | SRR1957755 | 2014 | 9  |    | Europe | United Kingdom | Enteritidis | Enteritidis | 1425  | 24477 |
| SAL_CA6814AA | 44709 | SRR1957754 | 2014 | 9  |    | Europe | United Kingdom | Enteritidis | Enteritidis | 3888  | 7867  |
| SAL_CA6818AA | 44682 | SRR1957750 | 2014 | 9  |    | Europe | United Kingdom | Enteritidis | Enteritidis | 1425  | 24473 |
| SAL_CA6819AA | 44740 | SRR1957749 | 2014 | 9  |    | Europe | United Kingdom | Enteritidis | Enteritidis | 1425  | 24472 |
| SAL_CA6820AA | 44758 | SRR1957748 | 2014 | 9  |    | Europe | United Kingdom | Enteritidis | Enteritidis | 1425  | 24471 |
| SAL_CA6821AA | 44745 | SRR1957747 | 2014 | 9  |    | Europe | United Kingdom | Enteritidis | Enteritidis | 1425  | 24470 |
| SAL_CA6822AA | 46606 | SRR1957746 | 2014 | 6  |    | Europe | United Kingdom | Enteritidis | Enteritidis | 1425  | 24469 |

|              |                  |            |      |    |               |                |                         |             |       |       |
|--------------|------------------|------------|------|----|---------------|----------------|-------------------------|-------------|-------|-------|
| SAL_CA6827AA | 44717            | SRR1957741 | 2014 | 9  | Europe        | United Kingdom | Enteritidis             | Enteritidis | 1425  | 24465 |
| SAL_CA6829AA | 44684            | SRR1957739 | 2014 | 9  | Europe        | United Kingdom | Enteritidis             | Enteritidis | 1425  | 24463 |
| SAL_CA6831AA | 44735            | SRR1957737 | 2014 | 9  | Europe        | United Kingdom | Enteritidis             | Enteritidis | 1425  | 24461 |
| SAL_CA6837AA | 44691            | SRR1957731 | 2014 | 9  | Europe        | United Kingdom | Enteritidis             | Enteritidis | 1425  | 24456 |
| SAL_CA6838AA | 44685            | SRR1957730 | 2014 | 9  | Europe        | United Kingdom | Enteritidis             | Enteritidis | 1425  | 24455 |
| SAL_CA6841AA | 44748            | SRR1957727 | 2014 | 9  | Europe        | United Kingdom | Enteritidis             | Enteritidis | 1425  | 24452 |
| SAL_CA6849AA | 46605            | SRR1957719 | 2014 | 6  | Europe        | United Kingdom | Enteritidis             | Enteritidis | 1425  | 24444 |
| SAL_CA6859AA | CFSAN030503      | SRR1955481 | 2012 |    | North America | United States  | Enteritidis             | Enteritidis | 1425  | 24435 |
| SAL_CA6860AA | CFSAN030497      | SRR1955480 | 2012 |    | North America | United States  | Enteritidis             | Enteritidis | 1425  | 24434 |
| SAL_CA6864AA | CFSAN030266      | SRR1955235 | 2014 | 4  | North America | United States  | Enteritidis (Predicted) | Enteritidis | 1425  | 24430 |
| SAL_CA6879AA | CFSAN030504      | SRR1952942 | 2012 |    | North America | United States  | Enteritidis             | Enteritidis | 26162 | 24416 |
| SAL_CA6880AA | CFSAN030496      | SRR1952941 | 2012 |    | North America | United States  | Enteritidis             | Enteritidis | 1425  | 24415 |
| SAL_CA6881AA | WAPHL_SAL-A00893 | SRR1952939 | 2015 | 1  | North America | United States  | Enteritidis             | Enteritidis | 1425  | 24414 |
| SAL_CA6882AA | 85727            | SRR1952936 | 2015 | 2  | Europe        | United Kingdom | Enteritidis             | Enteritidis | 1425  | 24413 |
| SAL_CA6884AA | 78666            | SRR1952934 | 2014 | 12 | Europe        | United Kingdom | Enteritidis             | Enteritidis | 1425  | 24411 |
| SAL_CA6885AA | 95238            | SRR1952933 | 2015 | 3  | Europe        | United Kingdom | Enteritidis (Predicted) | Enteritidis | 1425  | 24410 |
| SAL_CA6886AA | 86879            | SRR1952932 | 2015 | 2  | Europe        | United Kingdom | Enteritidis             | Enteritidis | 1425  | 24409 |
| SAL_CA6887AA | 69274            | SRR1952931 | 2014 | 11 | Europe        | United Kingdom | Enteritidis             | Enteritidis | 1425  | 24378 |
| SAL_CA6888AA | 83323            | SRR1952930 | 2015 | 1  | Europe        | United Kingdom | Enteritidis             | Enteritidis | 1425  | 24408 |
| SAL_CA6889AA | 83344            | SRR1952929 | 2015 | 1  | Europe        | United Kingdom | Enteritidis             | Enteritidis | 1425  | 24405 |
| SAL_CA6890AA | 96238            | SRR1952928 | 2015 | 3  | Europe        | United Kingdom | Enteritidis             | Enteritidis | 1425  | 24407 |
| SAL_CA6891AA | 96227            | SRR1952927 | 2015 | 3  | Europe        | United Kingdom | Enteritidis             | Enteritidis | 1425  | 24406 |
| SAL_CA6892AA | 82547            | SRR1952926 | 2015 | 1  | Europe        | United Kingdom | Enteritidis             | Enteritidis | 1425  | 24405 |
| SAL_CA6893AA | 90474            | SRR1952925 | 2015 | 2  | Europe        | United Kingdom | Enteritidis             | Enteritidis | 27915 | 24404 |
| SAL_CA6894AA | 62590            | SRR1952924 | 2014 | 10 | Europe        | United Kingdom | Enteritidis             | Enteritidis | 1425  | 24403 |
| SAL_CA6895AA | 90475            | SRR1952923 | 2015 | 2  | Europe        | United Kingdom | Enteritidis             | Enteritidis | 27915 | 24402 |
| SAL_CA6896AA | 87355            | SRR1952922 | 2015 | 2  | Europe        | United Kingdom | Enteritidis             | Enteritidis | 1425  | 24401 |
| SAL_CA6897AA | 94101            | SRR1952921 | 2015 | 3  | Europe        | United Kingdom | Enteritidis             | Enteritidis | 1425  | 24400 |
| SAL_CA6898AA | 67533            | SRR1952920 | 2014 | 11 | Europe        | United Kingdom | Enteritidis             | Enteritidis | 1425  | 24399 |
| SAL_CA6899AA | 91219            | SRR1952919 | 2015 | 2  | Europe        | United Kingdom | Enteritidis             | Enteritidis | 1425  | 24378 |
| SAL_CA6900AA | 63904            | SRR1952918 | 2014 | 11 | Europe        | United Kingdom | Enteritidis             | Enteritidis | 1425  | 24378 |
| SAL_CA6901AA | 98281            | SRR1952917 | 2015 | 3  | Europe        | United Kingdom | Enteritidis             | Enteritidis | 1425  | 24378 |
| SAL_CA6902AA | 62540            | SRR1952916 | 2014 | 10 | Europe        | United Kingdom | Enteritidis             | Enteritidis | 1425  | 24398 |
| SAL_CA6903AA | 60083            | SRR1952915 | 2014 | 10 | Europe        | United Kingdom | Enteritidis             | Enteritidis | 1425  | 24397 |
| SAL_CA6904AA | 63734            | SRR1952914 | 2014 | 10 | Europe        | United Kingdom | Enteritidis             | Enteritidis | 1425  | 24396 |
| SAL_CA6905AA | 52961            | SRR1952913 | 2014 | 10 | Europe        | United Kingdom | Enteritidis             | Enteritidis | 1425  | 24395 |
| SAL_CA6906AA | 60380            | SRR1952912 | 2014 | 10 | Europe        | United Kingdom | Enteritidis             | Enteritidis | 1425  | 24394 |
| SAL_CA6907AA | 69746            | SRR1952911 | 2014 | 11 | Europe        | United Kingdom | Enteritidis             | Enteritidis | 1425  | 24393 |
| SAL_CA6908AA | 94071            | SRR1952910 | 2015 | 3  | Europe        | United Kingdom | Enteritidis (Predicted) | Enteritidis | 1425  | 24392 |
| SAL_CA6909AA | 67563            | SRR1952909 | 2014 | 11 | Europe        | United Kingdom | Enteritidis             | Enteritidis | 1425  | 24391 |
| SAL_CA6910AA | 83702            | SRR1952908 | 2015 | 1  | Europe        | United Kingdom | Enteritidis             | Enteritidis | 1425  | 24390 |
| SAL_CA6911AA | 50148            | SRR1952907 | 2014 | 9  | Europe        | United Kingdom | Enteritidis             | Enteritidis | 1425  | 24389 |
| SAL_CA6912AA | 70698            | SRR1952906 | 2014 | 12 | Europe        | United Kingdom | Enteritidis             | Enteritidis | 1425  | 24378 |
| SAL_CA6913AA | 49747            | SRR1952905 | 2014 | 9  | Europe        | United Kingdom | Enteritidis             | Enteritidis | 1425  | 24388 |
| SAL_CA6914AA | 78701            | SRR1952903 | 2014 | 12 | Europe        | United Kingdom | Enteritidis             | Enteritidis | 1425  | 24387 |
| SAL_CA6915AA | 68973            | SRR1952902 | 2014 | 11 | Europe        | United Kingdom | Enteritidis             | Enteritidis | 1425  | 24386 |
| SAL_CA6916AA | 73136            | SRR1952901 | 2014 | 12 | Europe        | United Kingdom | Enteritidis             | Enteritidis | 1425  | 24378 |
| SAL_CA6917AA | 63535            | SRR1952900 | 2014 | 10 | Europe        | United Kingdom | Enteritidis             | Enteritidis | 1425  | 24378 |
| SAL_CA6918AA | 78629            | SRR1952899 | 2014 | 12 | Europe        | United Kingdom | Enteritidis             | Enteritidis | 1425  | 24378 |
| SAL_CA6919AA | 75956            | SRR1952898 | 2014 | 12 | Europe        | United Kingdom | Enteritidis             | Enteritidis | 1425  | 24385 |
| SAL_CA6920AA | 75953            | SRR1952897 | 2014 | 12 | Europe        | United Kingdom | Enteritidis             | Enteritidis | 1425  | 24384 |
| SAL_CA6921AA | 85756            | SRR1952896 | 2015 | 2  | Europe        | United Kingdom | Enteritidis             | Enteritidis | 1425  | 24383 |
| SAL_CA6922AA | 69213            | SRR1952895 | 2014 | 11 | Europe        | United Kingdom | Enteritidis             | Enteritidis | 1425  | 24382 |
| SAL_CA6923AA | 98284            | SRR1952894 | 2015 | 3  | Europe        | United Kingdom | Enteritidis             | Enteritidis | 1425  | 24381 |
| SAL_CA6924AA | 69753            | SRR1952892 | 2014 | 11 | Europe        | United Kingdom | Enteritidis             | Enteritidis | 1425  | 24378 |
| SAL_CA6925AA | 96204            | SRR1952891 | 2015 | 3  | Europe        | United Kingdom | Enteritidis             | Enteritidis | 1425  | 24380 |
| SAL_CA6926AA | 55562            | SRR1952890 | 2014 | 9  | Europe        | United Kingdom | Enteritidis             | Enteritidis | 1425  | 24378 |
| SAL_CA6927AA | 69752            | SRR1952889 | 2014 | 11 | Europe        | United Kingdom | Enteritidis             | Enteritidis | 1425  | 24378 |
| SAL_CA6928AA | 89104            | SRR1952888 | 2015 | 2  | Europe        | United Kingdom | Enteritidis             | Enteritidis | 1425  | 24379 |

|              |                   |            |      |    |               |                |                         |             |       |       |
|--------------|-------------------|------------|------|----|---------------|----------------|-------------------------|-------------|-------|-------|
| SAL_CA6929AA | 63883             | SRR1952887 | 2014 | 11 | Europe        | United Kingdom | Enteritidis             | Enteritidis | 1425  | 24378 |
| SAL_CA6930AA | 65024             | SRR1952886 | 2014 | 11 | Europe        | United Kingdom | Enteritidis             | Enteritidis | 1425  | 24378 |
| SAL_CA6931AA | 69221             | SRR1952885 | 2014 | 11 | Europe        | United Kingdom | Enteritidis             | Enteritidis | 1425  | 24377 |
| SAL_CA6932AA | 69911             | SRR1952884 | 2014 | 11 | Europe        | United Kingdom | Enteritidis             | Enteritidis | 1425  | 24376 |
| SAL_CA6933AA | 46154             | SRR1952822 | 2014 | 9  | Europe        | United Kingdom | Enteritidis             | Enteritidis | 1425  | 24375 |
| SAL_CA6934AA | 95024             | SRR1952821 | 2015 | 3  | Europe        | United Kingdom | Enteritidis             | Enteritidis | -1662 | 24374 |
| SAL_CA6935AA | 94262             | SRR1952820 | 2015 | 3  | Europe        | United Kingdom | Enteritidis             | Enteritidis | 1425  | 24373 |
| SAL_CA7008AA | IEH-NGS-SAL-02337 | SRR1950907 | 2014 | 4  | North America | United States  | Enteritidis (Predicted) | Enteritidis | 27904 | 24310 |
| SAL_CA7012AA | IEH-NGS-SAL-02346 | SRR1950902 | 2014 | 4  | North America | United States  | Enteritidis (Predicted) | Enteritidis | 1425  | 24308 |
| SAL_CA7017AA | CFSAN030208       | SRR1950897 | 2014 | 4  | North America | United States  | Enteritidis (Predicted) | Enteritidis | 1425  | 24303 |
| SAL_CA7020AA | CFSAN030238       | SRR1950884 | 2014 | 4  | North America | United States  | Enteritidis (Predicted) | Enteritidis | 1425  | 24300 |
| SAL_CA7038AA | FDA00000230       | SRR1947031 | 2002 | 3  | North America | Canada         | Enteritidis             | Enteritidis | 1425  | 24282 |
| SAL_CA7046AA | CFSAN030165       | SRR1947023 | 2014 | 4  | North America | United States  | Enteritidis (Predicted) | Enteritidis | 1425  | 24275 |
| SAL_CA7055AA | NY-N11265         | SRR1947012 | 2006 |    | North America | United States  | Enteritidis             | Enteritidis | 1425  | 24268 |
| SAL_CA7073AA | CFSAN030189       | SRR1946992 | 2014 | 4  | North America | United States  | Enteritidis (Predicted) | Enteritidis | 1425  | 24251 |
| SAL_CA7081AA | CFSAN030194       | SRR1946982 | 2014 | 4  | North America | United States  | Enteritidis (Predicted) | Enteritidis | 1425  | 24243 |
| SAL_CA7084AA | CFSAN030188       | SRR1946978 | 2014 | 4  | North America | United States  | Enteritidis (Predicted) | Enteritidis | 1425  | 24240 |
| SAL_CA7143AA | CFSAN030176       | SRR1946906 | 2014 | 4  | North America | United States  | Enteritidis (Predicted) | Enteritidis | 1425  | 24187 |
| SAL_CA7153AA | IEH-NGS-SAL-02307 | SRR1946886 | 2014 | 4  | North America | United States  | Enteritidis (Predicted) | Enteritidis | 1425  | 24176 |
| SAL_CA7156AA | NY-N11268         | SRR1946883 | 2006 |    | North America | United States  | Enteritidis             | Enteritidis | 1425  | 24174 |
| SAL_CA7162AA | CFSAN030200       | SRR1946871 | 2014 | 4  | North America | United States  | Enteritidis (Predicted) | Enteritidis | 1425  | 24168 |
| SAL_CA7177AA | PNUSA5000218      | SRR1931737 |      |    | North America | United States  | Enteritidis (Predicted) | Enteritidis | 1425  | 24156 |
| SAL_CA7178AA | PNUSA5000217      | SRR1931736 |      |    | North America | United States  | Enteritidis (Predicted) | Enteritidis | 1425  | 651   |
| SAL_CA7180AA | PNUSA5000196      | SRR1931734 | 2015 | 2  | North America | United States  | Enteritidis             | Enteritidis | 1425  | 24154 |
| SAL_CA7181AA | PNUSA5000195      | SRR1931732 | 2015 | 2  | North America | United States  | Enteritidis             | Enteritidis | 1425  | 24153 |
| SAL_CA7195AA | WAPHL_SAL-A00717  | SRR1923641 | 2006 |    | North America | United States  | Enteritidis             | Enteritidis | 1425  | 24140 |
| SAL_CA7206AA | FDA00002688       | SRR1920228 | 2008 | 2  | North America | Mexico         | Enteritidis             | Enteritidis | 1425  | 24129 |
| SAL_CA7219AA | FDA00002665       | SRR1920213 | 2008 | 1  | North America | Mexico         | Enteritidis             | Enteritidis | 1425  | 24116 |
| SAL_CA7246AA | IEH-NGS-SAL-02239 | SRR1918976 | 2014 | 4  | North America | United States  | Enteritidis (Predicted) | Enteritidis | 1425  | 24090 |
| SAL_CA7248AA | IEH-NGS-SAL-02238 | SRR1918974 | 2014 | 4  | North America | United States  | Enteritidis (Predicted) | Enteritidis | 1425  | 24088 |
| SAL_CA7252AA | IEH-NGS-SAL-02251 | SRR1918967 | 2014 | 4  | North America | United States  | Enteritidis (Predicted) | Enteritidis | 1425  | 24084 |
| SAL_CA7282AA | FDA00001051       | SRR1917494 | 2006 | 9  | Asia          | China          | Enteritidis             | Enteritidis | 1425  | 24058 |
| SAL_CA7306AA | FDA00001096       | SRR1917445 | 2007 | 4  | North America | United States  | Enteritidis             | Enteritidis | 8384  | 24036 |
| SAL_CA7326AA | IEH-NGS-SAL-02215 | SRR1916385 | 2014 | 4  | North America | United States  | Enteritidis (Predicted) | Enteritidis | 1425  | 24017 |
| SAL_CA7329AA | WAPHL_SAL-A00712  | SRR1916371 | 2006 |    | North America | United States  | Enteritidis             | Enteritidis | 1425  | 8780  |
| SAL_CA7351AA | IEH-NGS-SAL-02219 | SRR1916108 | 2014 | 4  | North America | United States  | Enteritidis (Predicted) | Enteritidis | 1425  | 23995 |
| SAL_CA7374AA | IEH-NGS-SAL-02216 | SRR1916085 | 2014 | 4  | North America | United States  | Enteritidis (Predicted) | Enteritidis | 1425  | 23973 |
| SAL_CA7393AA | PNUSA5000172      | SRR1915427 | 2015 | 1  | North America | United States  | Enteritidis             | Enteritidis | 1425  | 23956 |
| SAL_CA7424AA | FL-NRM299         | SRR1910756 | 2006 |    | North America | United States  | Enteritidis             | Enteritidis | 1425  | 23931 |
| SAL_CA7425AA | FL-NRM296         | SRR1910755 | 2006 |    | North America | United States  | Enteritidis             | Enteritidis | 1425  | 23930 |
| SAL_CA7435AA | CFSAN029739       | SRR1910309 | 2014 | 4  | North America | United States  | Enteritidis (Predicted) | Enteritidis | 1425  | 23920 |
| SAL_CA7437AA | CFSAN029732       | SRR1910307 | 2014 | 4  | North America | United States  | Enteritidis (Predicted) | Enteritidis | 1425  | 23918 |
| SAL_CA7439AA | IEH-NGS-SAL-02189 | SRR1910305 | 2014 | 4  | North America | United States  | Enteritidis (Predicted) | Enteritidis | 1425  | 23916 |
| SAL_CA7440AA | IEH-NGS-SAL-02187 | SRR1910304 | 2014 | 4  | North America | United States  | Enteritidis (Predicted) | Enteritidis | 1425  | 23915 |
| SAL_CA7444AA | IEH-NGS-SAL-02181 | SRR1910300 | 2014 | 4  | North America | United States  | Enteritidis (Predicted) | Enteritidis | 1425  | 23911 |
| SAL_CA7450AA | CFSAN029730       | SRR1910291 | 2014 | 4  | North America | United States  | Enteritidis (Predicted) | Enteritidis | 1425  | 23905 |
| SAL_CA7458AA | CFSAN029708       | SRR1909002 | 2014 | 4  | North America | United States  | Enteritidis (Predicted) | Enteritidis | 1425  | 23898 |
| SAL_CA7465AA | CFSAN029692       | SRR1908958 | 2014 | 4  | North America | United States  | Enteritidis (Predicted) | Enteritidis | 1425  | 23891 |
| SAL_CA7472AA | CFSAN029701       | SRR1908947 | 2014 | 4  | North America | United States  | Enteritidis (Predicted) | Enteritidis | 1425  | 23884 |
| SAL_CA7488AA | CFSAN029693       | SRR1861865 | 2014 | 4  | North America | United States  | Enteritidis (Predicted) | Enteritidis | 1425  | 23868 |
| SAL_CA7490AA | CFSAN029687       | SRR1861847 | 2014 | 4  | North America | United States  | Enteritidis (Predicted) | Enteritidis | 1425  | 23866 |
| SAL_CA7491AA | CFSAN029685       | SRR1861846 | 2014 | 4  | North America | United States  | Enteritidis (Predicted) | Enteritidis | 1425  | 23865 |
| SAL_CA7497AA | CFSAN029697       | SRR1861661 | 2014 | 4  | North America | United States  | Enteritidis (Predicted) | Enteritidis | 1425  | 23860 |
| SAL_CA7514AA | AUCVM-3370        | SRR1849400 | 2008 | 11 | North America | United States  | Enteritidis             | Enteritidis | 1425  | 23844 |
| SAL_CA7552AA | 15MN00034         | SRR1828986 | 2015 | 1  | North America | United States  | Enteritidis             | Enteritidis | 8003  | 23812 |
| SAL_CA7553AA | 15MN00031         | SRR1828985 | 2015 | 1  | North America | United States  | Enteritidis             | Enteritidis | 1425  | 23811 |
| SAL_CA7555AA | 15MN00037         | SRR1828980 | 2015 | 1  | North America | United States  | Enteritidis             | Enteritidis | 8003  | 23809 |
| SAL_CA7556AA | 15MN00032         | SRR1828979 | 2015 | 1  | North America | United States  | Enteritidis             | Enteritidis | 1425  | 23808 |
| SAL_CA7557AA | 15MN00030         | SRR1828978 | 2015 | 1  | North America | United States  | Enteritidis             | Enteritidis | 1425  | 23807 |

|              |                   |            |      |    |               |               |                         |             |       |       |
|--------------|-------------------|------------|------|----|---------------|---------------|-------------------------|-------------|-------|-------|
| SAL_CA7558AA | 15MN00029         | SRR1828977 | 2015 | 1  | North America | United States | Enteritidis             | Enteritidis | 1425  | 23806 |
| SAL_CA7560AA | 15MN00052         | SRR1828973 | 2015 | 1  | North America | United States | Enteritidis             | Enteritidis | 1425  | 15921 |
| SAL_CA7561AA | 15MN00042         | SRR1828972 | 2015 | 1  | North America | United States | Enteritidis             | Enteritidis | 1425  | 23804 |
| SAL_CA7562AA | 15MN00051         | SRR1828971 | 2015 | 1  | North America | United States | Enteritidis             | Enteritidis | 1425  | 23803 |
| SAL_CA7563AA | 15MN00033         | SRR1828970 | 2015 | 1  | North America | United States | Enteritidis             | Enteritidis | 1425  | 23802 |
| SAL_CA7564AA | 15MN00035         | SRR1828969 | 2015 | 1  | North America | United States | Enteritidis             | Enteritidis | 1425  | 23801 |
| SAL_CA7565AA | 15MN00036         | SRR1828968 | 2015 | 1  | North America | United States | Enteritidis             | Enteritidis | 1425  | 22169 |
| SAL_CA7566AA | 15MN00043         | SRR1828967 | 2015 | 1  | North America | United States | Enteritidis             | Enteritidis | 1425  | 23800 |
| SAL_CA7567AA | PNUSA5000171      | SRR1824479 | 2014 | 12 | North America | United States | Enteritidis             | Enteritidis | 1425  | 23799 |
| SAL_CA7568AA | PNUSA5000170      | SRR1824478 | 2014 | 12 | North America | United States | Enteritidis             | Enteritidis | 1425  | 12241 |
| SAL_CA7569AA | PNUSA5000167      | SRR1824476 | 2014 | 12 | North America | United States | Enteritidis             | Enteritidis | 1425  | 23798 |
| SAL_CA7570AA | PNUSA5000168      | SRR1824475 | 2014 | 12 | North America | United States | Enteritidis             | Enteritidis | 1425  | 23797 |
| SAL_CA7571AA | PNUSA5000169      | SRR1824473 | 2014 | 12 | North America | United States | Enteritidis             | Enteritidis | 1425  | 23796 |
| SAL_CA7591AA | FDA00003185       | SRR1823704 | 2009 | 9  | Asia          | Indonesia     | Enteritidis             | Enteritidis | 1425  | 23780 |
| SAL_CA7601AA | FL-NRM274         | SRR1823687 | 2006 |    | North America | United States | Enteritidis             | Enteritidis | 1425  | 23771 |
| SAL_CA7620AA | PNUSA5000149      | SRR1822478 | 2015 | 1  | North America | United States | Enteritidis             | Enteritidis | 1425  | 23757 |
| SAL_CA7635AA | WAPHL_SAL-A00700  | SRR1822299 | 2006 |    | North America | United States | Enteritidis             | Enteritidis | 1425  | 23747 |
| SAL_CA7646AA | 15MN00060         | SRR1822285 | 2015 | 2  | North America | United States | Enteritidis             | Enteritidis | 1425  | 23738 |
| SAL_CA7650AA | 15MN00063         | SRR1822281 | 2015 | 2  | North America | United States | Enteritidis             | Enteritidis | 1425  | 23736 |
| SAL_CA7651AA | 15MN00062         | SRR1822280 | 2015 | 2  | North America | United States | Enteritidis             | Enteritidis | 1425  | 23735 |
| SAL_CA7652AA | 15MN00059         | SRR1822279 | 2015 | 2  | North America | United States | Enteritidis             | Enteritidis | 1425  | 23734 |
| SAL_CA7653AA | 15MN00058         | SRR1822278 | 2015 | 2  | North America | United States | Enteritidis             | Enteritidis | 1425  | 17527 |
| SAL_CA7656AA | 15MN00061         | SRR1822275 | 2015 | 2  | North America | United States | Enteritidis             | Enteritidis | 1425  | 23731 |
| SAL_CA7743AA | CFSAN028645       | SRR1813457 | 2014 | 3  | North America | United States | Enteritidis (Predicted) | Enteritidis | 1425  | 23658 |
| SAL_CA7756AA | 15MN00057         | SRR1813444 | 2015 | 2  | North America | United States | Enteritidis             | Enteritidis | 1425  | 23647 |
| SAL_CA7766AA | 15MN00056         | SRR1813434 | 2015 | 2  | North America | United States | Enteritidis             | Enteritidis | 1425  | 23637 |
| SAL_CA7770AA | CFSAN028641       | SRR1813430 | 2014 | 3  | North America | United States | Enteritidis (Predicted) | Enteritidis | 1425  | 23633 |
| SAL_CA7776AA | CFSAN028636       | SRR1813424 | 2014 | 3  | North America | United States | Enteritidis (Predicted) | Enteritidis | 1425  | 23629 |
| SAL_CA7804AA | CFSAN027388       | SRR1812866 | 2012 |    | North America | United States | Enteritidis             | Enteritidis | 1425  | 23602 |
| SAL_CA7806AA | CFSAN027394       | SRR1812863 | 2012 |    | North America | United States | Enteritidis             | Enteritidis | 1425  | 14326 |
| SAL_CA7819AA | CFSAN027389       | SRR1812849 | 2012 |    | North America | United States | Enteritidis             | Enteritidis | 1425  | 23589 |
| SAL_CA7837AA | CFSAN027378       | SRR1812826 | 2012 |    | North America | United States | Enteritidis             | Enteritidis | 1425  | 23574 |
| SAL_CA7857AA | CFSAN027377       | SRR1812801 | 2012 |    | North America | United States | Enteritidis             | Enteritidis | 1425  | 23556 |
| SAL_CA7870AA | 2015K-0047        | SRR1812342 |      |    | North America | United States | Enteritidis (Predicted) | Enteritidis | 1425  | 23543 |
| SAL_CA7878AA | 15MN00054         | SRR1811675 | 2015 | 2  | North America | United States | Enteritidis             | Enteritidis | 1425  | 23535 |
| SAL_CA7879AA | 15MN00050         | SRR1811628 | 2015 | 2  | North America | United States | Enteritidis             | Enteritidis | 1425  | 23534 |
| SAL_CA7880AA | NY_swgs1001       | SRR974686  | 2013 | 8  | North America | United States | Enteritidis (Predicted) | Enteritidis | 1425  | 23533 |
| SAL_CA7909AA | CFSAN028609       | SRR1810569 | 2014 | 3  | North America | United States | Enteritidis (Predicted) | Enteritidis | 28208 | 23509 |
| SAL_CA7916AA | CFSAN028615       | SRR1810557 | 2014 | 3  | North America | United States | Enteritidis (Predicted) | Enteritidis | 27901 | 23503 |
| SAL_CA7971AA | CFSAN028592       | SRR1805655 | 2014 | 3  | North America | United States | Enteritidis (Predicted) | Enteritidis | 1425  | 23461 |
| SAL_CA8006AA | 15MN00023         | SRR1805601 | 2015 | 1  | North America | United States | Enteritidis             | Enteritidis | 1425  | 23427 |
| SAL_CA8028AA | WAPHL_SAL-A00684  | SRR1805577 | 2006 |    | North America | United States | Enteritidis             | Enteritidis | 1425  | 23405 |
| SAL_CA8075AA | IEH-NGS-SAL-01942 | SRR1803038 | 2014 | 3  | North America | United States | Enteritidis (Predicted) | Enteritidis | 1425  | 23368 |
| SAL_CA8082AA | FDA00001583       | SRR1802986 | 2001 | 4  | North America | United States | Enteritidis             | Enteritidis | 1425  | 16461 |
| SAL_CA8084AA | CFSAN028568       | SRR1802984 | 2014 | 3  | North America | United States | Enteritidis (Predicted) | Enteritidis | 1425  | 23361 |
| SAL_CA8089AA | FDA00001582       | SRR1802935 | 2001 | 4  | North America | United States | Enteritidis             | Enteritidis | 1425  | 23357 |
| SAL_CA8095AA | FDA00000054       | SRR1802918 | 2001 | 4  | North America | Canada        | Enteritidis             | Enteritidis | 1425  | 23353 |
| SAL_CA8115AA | PNUSA5000162      | SRR1802280 |      |    | North America | United States | Enteritidis (Predicted) | Enteritidis | 1425  | 23337 |
| SAL_CA8130AA | FL-NRM244         | SRR1801551 | 2006 |    | North America | United States | Enteritidis             | Enteritidis | 1425  | 23323 |
| SAL_CA8141AA | IEH-NGS-SAL-01922 | SRR1799716 | 2014 | 3  | North America | United States | Enteritidis (Predicted) | Enteritidis | 1425  | 23312 |
| SAL_CA8142AA | IEH-NGS-SAL-01941 | SRR1799714 | 2014 | 3  | North America | United States | Enteritidis (Predicted) | Enteritidis | 1425  | 10271 |
| SAL_CA8148AA | CFSAN028061       | SRR1799708 | 2014 | 3  | North America | United States | Enteritidis (Predicted) | Enteritidis | 1425  | 23306 |
| SAL_CA8149AA | CFSAN028053       | SRR1799707 | 2014 | 3  | North America | United States | Enteritidis (Predicted) | Enteritidis | 1425  | 23305 |
| SAL_CA8156AA | CFSAN028056       | SRR1799700 | 2014 | 3  | North America | United States | Enteritidis (Predicted) | Enteritidis | 1425  | 23298 |
| SAL_CA8159AA | CFSAN028027       | SRR1796135 | 2014 | 1  | North America | United States | Enteritidis (Predicted) | Enteritidis | 1425  | 23295 |
| SAL_CA8168AA | IEH-NGS-SAL-01907 | SRR1796098 | 2014 | 1  | North America | United States | Enteritidis (Predicted) | Enteritidis | 1425  | 23286 |
| SAL_CA8172AA | CFSAN028028       | SRR1796066 | 2014 | 1  | North America | United States | Enteritidis (Predicted) | Enteritidis | 1425  | 23282 |
| SAL_CA8234AA | FL-NRM220         | SRR1793258 | 2006 |    | North America | United States | Enteritidis             | Enteritidis | 1425  | 23222 |
| SAL_CA8258AA | FDA00001501       | SRR1792725 | 2010 | 12 | Asia          | Taiwan        | Enteritidis             | Enteritidis | 28195 | 23199 |

|              |                  |            |      |    |               |               |                         |             |       |       |
|--------------|------------------|------------|------|----|---------------|---------------|-------------------------|-------------|-------|-------|
| SAL_CA8291AA | FL-NRM203        | SRR1791289 | 2005 |    | North America | United States | Enteritidis             | Enteritidis | 1425  | 23170 |
| SAL_CA8301AA | FL-NRM202        | SRR1791272 | 2005 |    | North America | United States | Enteritidis             | Enteritidis | 1425  | 23162 |
| SAL_CA8310AA | PNUSA5000148     | SRR1784332 | 2014 | 12 | North America | United States | Enteritidis             | Enteritidis | 1425  | 23157 |
| SAL_CA8311AA | PNUSA5000147     | SRR1784330 |      |    | North America | United States | Enteritidis (Predicted) | Enteritidis | 1425  | 23156 |
| SAL_CA8312AA | PNUSA5000146     | SRR1784329 |      |    | North America | United States | Enteritidis (Predicted) | Enteritidis | 1425  | 23155 |
| SAL_CA8313AA | PNUSA5000145     | SRR1784328 |      |    | North America | United States | Enteritidis (Predicted) | Enteritidis | 28194 | 23154 |
| SAL_CA8350AA | NY-33944         | SRR1783182 | 2003 |    | North America | United States | Enteritidis             | Enteritidis | 1425  | 23123 |
| SAL_CA8462AA | FDA00000897      | SRR1777689 | 2005 | 10 | Asia          | China         | Enteritidis             | Enteritidis | 1425  | 23028 |
| SAL_CA8483AA | FL-NRM169        | SRR1777668 | 2005 |    | North America | United States | Enteritidis             | Enteritidis | 1425  | 23009 |
| SAL_CA8494AA | CFSAN028523      | SRR1774102 | 2012 |    | North America | United States | Enteritidis             | Enteritidis | 1425  | 22999 |
| SAL_CA8521AA | CFSAN028525      | SRR1774059 | 2012 |    | North America | United States | Enteritidis             | Enteritidis | 1425  | 22977 |
| SAL_CA8527AA | CFSAN028530      | SRR1774053 | 2012 |    | North America | United States | Enteritidis             | Enteritidis | 1425  | 22973 |
| SAL_CA8529AA | 15MN00025        | SRR1774023 | 2015 | 1  | North America | United States | Enteritidis             | Enteritidis | 1425  | 9531  |
| SAL_CA8532AA | WAPHL_SAL-A00674 | SRR1774020 | 2014 | 11 | North America | United States | Enteritidis             | Enteritidis | 1425  | 14335 |
| SAL_CA8534AA | 15MN00022        | SRR1774018 | 2015 | 1  | North America | United States | Enteritidis             | Enteritidis | 26832 | 22968 |
| SAL_CA8536AA | WAPHL_SAL-A00677 | SRR1774016 | 2014 | 11 | North America | United States | Enteritidis             | Enteritidis | 1425  | 22966 |
| SAL_CA8537AA | WAPHL_SAL-A00670 | SRR1774015 | 2014 | 10 | North America | United States | Enteritidis             | Enteritidis | 1425  | 22922 |
| SAL_CA8538AA | WAPHL_SAL-A00669 | SRR1774014 | 2014 | 10 | North America | United States | Enteritidis             | Enteritidis | 1425  | 22965 |
| SAL_CA8540AA | 15MN00028        | SRR1773839 | 2015 | 1  | North America | United States | Enteritidis             | Enteritidis | 1425  | 22964 |
| SAL_CA8552AA | 15MN00027        | SRR1773636 | 2015 | 1  | North America | United States | Enteritidis             | Enteritidis | 1425  | 22955 |
| SAL_CA8557AA | WAPHL_SAL-A00676 | SRR1773596 | 2014 | 11 | North America | United States | Enteritidis             | Enteritidis | 1425  | 22950 |
| SAL_CA8558AA | 15MN00026        | SRR1773594 | 2015 | 1  | North America | United States | Enteritidis             | Enteritidis | 1425  | 22949 |
| SAL_CA8559AA | 15MN00024        | SRR1773593 | 2015 | 1  | North America | United States | Enteritidis             | Enteritidis | 1425  | 22948 |
| SAL_CA8660AA | 15MN00021        | SRR1765792 | 2015 | 1  | North America | United States | Enteritidis             | Enteritidis | 1425  | 22863 |
| SAL_CA8661AA | 15MN00020        | SRR1765791 | 2015 | 1  | North America | United States | Enteritidis             | Enteritidis | 1425  | 22862 |
| SAL_CA8662AA | 15MN00004        | SRR1765788 | 2015 | 1  | North America | United States | Enteritidis             | Enteritidis | 1425  | 22861 |
| SAL_CA8663AA | 15MN00003        | SRR1765787 | 2015 | 1  | North America | United States | Enteritidis             | Enteritidis | 26832 | 22860 |
| SAL_CA8664AA | 15MN00002        | SRR1765786 | 2015 | 1  | North America | United States | Enteritidis             | Enteritidis | 1425  | 22859 |
| SAL_CA8684AA | CFSAN026628      | SRR1763865 | 2007 |    | Europe        | Belgium       | Enteritidis             | Enteritidis | 1425  | 22841 |
| SAL_CA8686AA | CFSAN026633      | SRR1763862 | 2013 |    | Europe        | Belgium       | Enteritidis             | Enteritidis | 1425  | 22839 |
| SAL_CA8687AA | CFSAN026627      | SRR1763861 | 2002 |    | Europe        | Belgium       | Enteritidis             | Enteritidis | 1425  | 22838 |
| SAL_CA8690AA | CFSAN026639      | SRR1763856 | 2011 |    | Europe        | Belgium       | Enteritidis             | Enteritidis | 1425  | 22835 |
| SAL_CA8705AA | CFSAN026640      | SRR1763836 | 2011 |    | Europe        | Belgium       | Enteritidis             | Enteritidis | 1425  | 22820 |
| SAL_CA8709AA | CFSAN026634      | SRR1763830 | 2014 |    | Europe        | Belgium       | Enteritidis             | Enteritidis | 1425  | 22817 |
| SAL_CA8712AA | CFSAN026636      | SRR1763827 | 2013 |    | Europe        | Belgium       | Enteritidis             | Enteritidis | -1731 | 22814 |
| SAL_CA8716AA | CFSAN026641      | SRR1763822 | 2011 |    | Europe        | Belgium       | Enteritidis             | Enteritidis | 3888  | 22810 |
| SAL_CA8717AA | CFSAN026631      | SRR1763821 | 2010 |    | Europe        | Belgium       | Enteritidis             | Enteritidis | 1425  | 22809 |
| SAL_CA8718AA | CFSAN026630      | SRR1763820 | 2009 |    | Europe        | Belgium       | Enteritidis             | Enteritidis | 1425  | 22808 |
| SAL_CA8719AA | CFSAN026629      | SRR1763819 | 2008 |    | Europe        | Belgium       | Enteritidis             | Enteritidis | 1425  | 22807 |
| SAL_CA8728AA | CFSAN026632      | SRR1763807 | 2012 |    | Europe        | Belgium       | Enteritidis             | Enteritidis | 1425  | 22800 |
| SAL_CA8730AA | CFSAN026642      | SRR1763803 | 2011 |    | Europe        | Belgium       | Enteritidis             | Enteritidis | 3888  | 22798 |
| SAL_CA8731AA | CFSAN026638      | SRR1763802 | 2011 |    | Europe        | Belgium       | Enteritidis             | Enteritidis | 3888  | 22797 |
| SAL_CA8732AA | CFSAN026637      | SRR1763801 | 2010 |    | Europe        | Belgium       | Enteritidis             | Enteritidis | 1425  | 22796 |
| SAL_CA8754AA | MDH-2014-00967   | SRR1576829 | 2014 | 9  | North America | United States | Enteritidis             | Enteritidis | 1425  | 18563 |
| SAL_CA8760AA | AUCVM-2480       | SRR1752896 | 1990 | 6  | North America | United States | Enteritidis             | Enteritidis | 1425  | 22770 |
| SAL_CA8761AA | AUCVM-775        | SRR1752895 | 2001 | 9  | North America | United States | Enteritidis             | Enteritidis | 1425  | 22771 |
| SAL_CA8762AA | WAPHL_SAL-A00673 | SRR1752894 | 2014 | 10 | North America | United States | Enteritidis             | Enteritidis | 1425  | 22715 |
| SAL_CA8766AA | MDH-2014-01089   | SRR1752890 | 2014 | 12 | North America | United States | Enteritidis             | Enteritidis | 1425  | 22767 |
| SAL_CA8769AA | AZ-TG74584       | SRR1752887 | 2005 |    | North America | United States | Enteritidis             | Enteritidis | 1425  | 22764 |
| SAL_CA8773AA | AZ-TG74476       | SRR1752882 | 2005 |    | North America | United States | Enteritidis             | Enteritidis | 1425  | 22761 |
| SAL_CA8783AA | WAPHL_SAL-A00678 | SRR1752871 | 2014 | 12 | North America | United States | Enteritidis             | Enteritidis | 8003  | 22752 |
| SAL_CA8787AA | AUCVM-1614       | SRR1752867 | 1990 | 2  | North America | United States | Enteritidis             | Enteritidis | 1425  | 22748 |
| SAL_CA8794AA | AUCVM-279        | SRR1752853 | 1990 | 8  | North America | United States | Enteritidis             | Enteritidis | 1425  | 22741 |
| SAL_CA8801AA | WAPHL_SAL-A00671 | SRR1752835 | 2014 | 10 | North America | United States | Enteritidis             | Enteritidis | 1425  | 22734 |
| SAL_CA8805AA | AUCVM-420        | SRR1752828 | 2006 | 8  | North America | United States | Enteritidis             | Enteritidis | 7801  | 22730 |
| SAL_CA8810AA | AUCVM-2640       | SRR1752814 | 2004 | 2  | North America | United States | Enteritidis             | Enteritidis | 1425  | 22725 |
| SAL_CA8812AA | WAPHL_SAL-A00668 | SRR1752812 | 2014 | 10 | North America | United States | Enteritidis             | Enteritidis | 1425  | 22724 |
| SAL_CA8815AA | WAPHL_SAL-A00681 | SRR1752809 | 2014 | 12 | North America | United States | Enteritidis             | Enteritidis | 1425  | 22721 |
| SAL_CA8821AA | WAPHL_SAL-A00682 | SRR1752785 | 2014 | 12 | North America | United States | Enteritidis             | Enteritidis | 1425  | 22716 |

|              |                  |            |      |    |               |               |                         |             |       |       |
|--------------|------------------|------------|------|----|---------------|---------------|-------------------------|-------------|-------|-------|
| SAL_CA8822AA | WAPHL_SAL-A00679 | SRR1752784 | 2014 | 11 | North America | United States | Enteritidis             | Enteritidis | 1425  | 22715 |
| SAL_CA8823AA | AUCVM-1660       | SRR1752783 | 1994 | 1  | North America | United States | Enteritidis             | Enteritidis | 7801  | 22714 |
| SAL_CA8828AA | WAPHL_SAL-A00675 | SRR1752778 | 2014 | 10 | North America | United States | Enteritidis             | Enteritidis | 1425  | 22710 |
| SAL_CA8829AA | WAPHL_SAL-A00683 | SRR1752739 | 2014 | 12 | North America | United States | Enteritidis             | Enteritidis | 1425  | 22709 |
| SAL_CA8830AA | 12D14456         | SRR1752737 | 2012 | 9  | North America | United States | Enteritidis             | Enteritidis | 1425  | 22708 |
| SAL_CA8837AA | 15MN00001        | SRR1752724 | 2014 | 12 | North America | United States | Enteritidis             | Enteritidis | 1425  | 22702 |
| SAL_CA8838AA | WAPHL_SAL-A00680 | SRR1752723 | 2014 | 11 | North America | United States | Enteritidis             | Enteritidis | 1425  | 22701 |
| SAL_CA8855AA | FDA00001350      | SRR1745625 | 2009 | 7  | Asia          | China         | Enteritidis             | Enteritidis | 1425  | 22689 |
| SAL_CA8887AA | CFSAN024814      | SRR1745591 | 2012 |    | North America | United States | Enteritidis             | Enteritidis | 1425  | 18646 |
| SAL_CA8900AA | CFSAN024813      | SRR1745577 | 2012 |    | North America | United States | Enteritidis             | Enteritidis | 26162 | 22651 |
| SAL_CA8999AA | FDA00000603      | SRR1743998 | 2004 | 2  | South America | Ecuador       | Enteritidis             | Enteritidis | 1425  | 22578 |
| SAL_CA9014AA | PNUSAS000125     | SRR1738017 | 2014 | 10 | North America | United States | Enteritidis             | Enteritidis | 1425  | 22564 |
| SAL_CA9089AA | FDA00003514      | SRR1732585 | 2011 | 10 | North America | United States | Enteritidis             | Enteritidis | 1425  | 12822 |
| SAL_CA9205AA | PNUSAS000123     | SRR1724679 | 2014 | 11 | North America | United States | Enteritidis             | Enteritidis | 1425  | 22404 |
| SAL_CA9209AA | PNUSAS000118     | SRR1724675 | 2014 | 10 | North America | United States | Enteritidis             | Enteritidis | 1425  | 22401 |
| SAL_CA9210AA | PNUSAS000117     | SRR1724674 | 2014 | 10 | North America | United States | Enteritidis             | Enteritidis | 1425  | 22400 |
| SAL_CA9211AA | PNUSAS000116     | SRR1724673 | 2014 | 10 | North America | United States | Enteritidis             | Enteritidis | 1425  | 22399 |
| SAL_CA9213AA | 2014K-1007       | SRR1724671 | 2014 | 11 | North America | United States | Enteritidis             | Enteritidis | 1425  | 21858 |
| SAL_CA9214AA | 2014K-0996       | SRR1724670 |      |    | North America | United States | Enteritidis (Predicted) | Enteritidis | 1425  | 21858 |
| SAL_CA9244AA | CFSAN025693      | SRR1720754 | 2012 |    | North America | United States | Enteritidis             | Enteritidis | 1425  | 22379 |
| SAL_CA9262AA | NY-swgs1556      | SRR1720477 | 2014 | 11 | North America | United States | Enteritidis             | Enteritidis | 1425  | 22363 |
| SAL_CA9279AA | NY-swgs1557      | SRR1720459 | 2014 | 11 | North America | United States | Enteritidis             | Enteritidis | 1425  | 22346 |
| SAL_CA9300AA | MDH-2014-01078   | SRR1713649 | 2014 | 12 | North America | United States | Enteritidis             | Enteritidis | 1425  | 22325 |
| SAL_CA9304AA | MDH-2014-01080   | SRR1713645 | 2014 | 12 | North America | United States | Enteritidis             | Enteritidis | 3888  | 22322 |
| SAL_CA9309AA | NY-30663         | SRR1713640 | 2003 |    | North America | United States | Enteritidis             | Enteritidis | 1425  | 22319 |
| SAL_CA9311AA | MDH-2014-01079   | SRR1713637 | 2014 | 12 | North America | United States | Enteritidis             | Enteritidis | 1425  | 21950 |
| SAL_CA9340AA | WAPHL_SAL-A00666 | SRR1709664 | 2014 | 10 | North America | United States | Enteritidis             | Enteritidis | 1425  | 22294 |
| SAL_CA9341AA | WAPHL_SAL-A00672 | SRR1709633 | 2014 | 10 | North America | United States | Enteritidis             | Enteritidis | 1425  | 22293 |
| SAL_CA9342AA | WAPHL_SAL-A00667 | SRR1709600 | 2014 | 10 | North America | United States | Enteritidis             | Enteritidis | 1425  | 22292 |
| SAL_CA9385AA | PNUSAS000073     | SRR1703349 | 2014 | 10 | North America | United States | Enteritidis             | Enteritidis | 1425  | 22259 |
| SAL_CA9386AA | PNUSAS000072     | SRR1703348 |      |    | North America | United States | Enteritidis (Predicted) | Enteritidis | 1425  | 22258 |
| SAL_CA9387AA | PNUSAS000071     | SRR1703347 | 2014 | 9  | North America | United States | Enteritidis             | Enteritidis | 1425  | 21729 |
| SAL_CA9388AA | PNUSAS000070     | SRR1703346 |      |    | North America | United States | Enteritidis (Predicted) | Enteritidis | 1425  | 22257 |
| SAL_CA9389AA | PNUSAS000069     | SRR1703345 |      |    | North America | United States | Enteritidis (Predicted) | Enteritidis | 1425  | 22256 |
| SAL_CA9393AA | 2014K-0977       | SRR1703341 |      |    | North America | United States | Enteritidis (Predicted) | Enteritidis | 1425  | 22248 |
| SAL_CA9398AA | 2014K-0964       | SRR1703336 | 2014 | 11 | North America | United States | Enteritidis             | Enteritidis | 1425  | 21858 |
| SAL_CA9402AA | 2014K-0949       | SRR1703332 | 2014 | 10 | North America | United States | Enteritidis             | Enteritidis | 1425  | 22248 |
| SAL_CA9407AA | 2014K-0502-2     | SRR1703258 |      |    | North America | United States | Enteritidis (Predicted) | Enteritidis | 27863 | 22245 |
| SAL_CA9408AA | 2014K-0501-2     | SRR1703257 |      |    | North America | United States | Enteritidis (Predicted) | Enteritidis | 27863 | 19990 |
| SAL_CA9409AA | 2014K-0499-2     | SRR1703256 |      |    | North America | United States | Enteritidis (Predicted) | Enteritidis | 27863 | 19990 |
| SAL_CA9436AA | NY-30658         | SRR1698204 | 2003 |    | North America | United States | Enteritidis             | Enteritidis | 28163 | 22228 |
| SAL_CA9440AA | FDA00004012      | SRR1698195 | 2012 | 4  | Asia          | China         | Enteritidis             | Enteritidis | 1425  | 22224 |
| SAL_CA9457AA | PNUSAS000102     | SRR1696968 | 2014 | 11 | North America | United States | Enteritidis             | Enteritidis | 1425  | 22208 |
| SAL_CA9522AA | MDH-2014-01067   | SRR1696485 | 2014 | 11 | North America | United States | Enteritidis             | Enteritidis | 1425  | 22169 |
| SAL_CA9541AA | NY-swgs1550      | SRR1695773 | 2014 | 10 | North America | United States | Enteritidis             | Enteritidis | 7801  | 22154 |
| SAL_CA9543AA | CFSAN025708      | SRR1695770 | 2012 |    | North America | United States | Enteritidis             | Enteritidis | 1425  | 22152 |
| SAL_CA9549AA | CFSAN025699      | SRR1695764 | 2012 |    | North America | United States | Enteritidis             | Enteritidis | 1425  | 22149 |
| SAL_CA9551AA | CFSAN024831      | SRR1695762 | 2012 |    | North America | United States | Enteritidis             | Enteritidis | 1425  | 22140 |
| SAL_CA9552AA | CFSAN024827      | SRR1695761 | 2012 |    | North America | United States | Enteritidis             | Enteritidis | 1425  | 22147 |
| SAL_CA9556AA | CFSAN025717      | SRR1695757 | 2012 |    | North America | United States | Enteritidis             | Enteritidis | 1425  | 22143 |
| SAL_CA9557AA | CFSAN025689      | SRR1695756 | 2012 |    | North America | United States | Enteritidis             | Enteritidis | 1425  | 22142 |
| SAL_CA9558AA | CFSAN024840      | SRR1695755 | 2012 |    | North America | United States | Enteritidis             | Enteritidis | 1425  | 22141 |
| SAL_CA9559AA | CFSAN024832      | SRR1695754 | 2012 |    | North America | United States | Enteritidis             | Enteritidis | 1425  | 22140 |
| SAL_CA9561AA | NY-swgs1549      | SRR1695752 | 2014 | 11 | North America | United States | Enteritidis             | Enteritidis | 8003  | 22138 |
| SAL_CA9565AA | CFSAN025700      | SRR1695748 | 2012 |    | North America | United States | Enteritidis             | Enteritidis | 1425  | 22134 |
| SAL_CA9572AA | NY-swgs1552      | SRR1695741 | 2014 | 11 | North America | United States | Enteritidis             | Enteritidis | 1425  | 2668  |
| SAL_CA9581AA | NY-swgs1554      | SRR1695628 | 2014 | 11 | North America | United States | Enteritidis             | Enteritidis | 1425  | 22120 |
| SAL_CA9582AA | NY-swgs1547      | SRR1695627 | 2014 | 11 | North America | United States | Enteritidis             | Enteritidis | 1425  | 21858 |
| SAL_CA9583AA | NY-swgs1544      | SRR1695626 | 2014 | 10 | North America | United States | Enteritidis             | Enteritidis | 1425  | 22119 |

|              |                  |            |      |    |               |               |                         |             |       |       |
|--------------|------------------|------------|------|----|---------------|---------------|-------------------------|-------------|-------|-------|
| SAL_CA9588AA | NY-swgs1553      | SRR1695616 | 2014 | 11 | North America | United States | Enteritidis             | Enteritidis | 1425  | 22114 |
| SAL_CA9590AA | NY-swgs1548      | SRR1695613 | 2014 | 11 | North America | United States | Enteritidis             | Enteritidis | 1425  | 22112 |
| SAL_CA9591AA | NY-swgs1546      | SRR1695612 | 2014 | 11 | North America | United States | Enteritidis             | Enteritidis | 1425  | 22111 |
| SAL_CA9592AA | NY-swgs1545      | SRR1695611 | 2014 | 11 | North America | United States | Enteritidis             | Enteritidis | 1425  | 22110 |
| SAL_CA9593AA | NY-swgs1543      | SRR1695610 | 2014 | 11 | North America | United States | Enteritidis             | Enteritidis | 1425  | 22109 |
| SAL_CA9594AA | NY-swgs1542      | SRR1695609 | 2014 | 11 | North America | United States | Enteritidis             | Enteritidis | 1425  | 21858 |
| SAL_CA9601AA | NY-swgs1555      | SRR1695600 | 2014 | 11 | North America | United States | Enteritidis             | Enteritidis | 1425  | 21858 |
| SAL_CA9602AA | NY-swgs1551      | SRR1695599 | 2014 | 11 | North America | United States | Enteritidis             | Enteritidis | 1425  | 21858 |
| SAL_CA9648AA | PNUSA5000109     | SRR1693630 | 2014 | 10 | North America | United States | Enteritidis             | Enteritidis | 1425  | 22065 |
| SAL_CA9650AA | PNUSA5000107     | SRR1693628 |      |    | North America | United States | Enteritidis (Predicted) | Enteritidis | 1425  | 22063 |
| SAL_CA9651AA | PNUSA5000106     | SRR1693627 |      |    | North America | United States | Enteritidis (Predicted) | Enteritidis | 1425  | 22062 |
| SAL_CA9664AA | WAPHL_SAL-A00657 | SRR1693399 | 2014 | 9  | North America | United States | Enteritidis             | Enteritidis | 1425  | 22051 |
| SAL_CA9666AA | WAPHL_SAL-A00655 | SRR1693394 | 2014 | 9  | North America | United States | Enteritidis             | Enteritidis | 1425  | 22050 |
| SAL_CA9675AA | WAPHL_SAL-A00656 | SRR1693302 | 2014 | 9  | North America | United States | Enteritidis             | Enteritidis | 1425  | 22041 |
| SAL_CA9686AA | WAPHL_SAL-A00658 | SRR1693282 | 2014 | 9  | North America | United States | Enteritidis             | Enteritidis | 1425  | 22031 |
| SAL_CA9690AA | WAPHL_SAL-A00654 | SRR1693275 | 2014 | 9  | North America | United States | Enteritidis             | Enteritidis | 1425  | 22027 |
| SAL_CA9728AA | FDA00000397      | SRR1687183 | 2003 | 3  | Europe        | Netherlands   | Enteritidis             | Enteritidis | 1425  | 21991 |
| SAL_CA9730AA | 2014K-0958       | SRR1686427 | 2014 | 11 | North America | United States | Enteritidis             | Enteritidis | 1425  | 21858 |
| SAL_CA9734AA | 2014K-0950       | SRR1686423 | 2014 | 10 | North America | United States | Enteritidis             | Enteritidis | 1425  | 21858 |
| SAL_CA9735AA | 2014K-0948       | SRR1686422 | 2014 | 10 | North America | United States | Enteritidis             | Enteritidis | 1425  | 21858 |
| SAL_CA9758AA | FDA00002645      | SRR1685377 | 2007 | 12 | Asia          | South Korea   | Enteritidis             | Enteritidis | 1425  | 21971 |
| SAL_CA9784AA | MDH-2014-01062   | SRR1664788 | 2014 | 11 | North America | United States | Enteritidis             | Enteritidis | 1425  | 21950 |
| SAL_CA9801AA | PNUSA5000105     | SRR1664340 |      |    | North America | United States | Enteritidis (Predicted) | Enteritidis | 1425  | 21935 |
| SAL_CA9802AA | PNUSA5000104     | SRR1664339 |      |    | North America | United States | Enteritidis (Predicted) | Enteritidis | 1425  | 14319 |
| SAL_CA9803AA | PNUSA5000103     | SRR1664338 |      |    | North America | United States | Enteritidis (Predicted) | Enteritidis | 1425  | 21934 |
| SAL_CA9804AA | PNUSA5000093     | SRR1664337 |      |    | North America | United States | Enteritidis (Predicted) | Enteritidis | 1425  | 21933 |
| SAL_CA9805AA | PNUSA5000092     | SRR1664336 |      |    | North America | United States | Enteritidis (Predicted) | Enteritidis | 1425  | 21932 |
| SAL_CA9806AA | PNUSA5000091     | SRR1664335 |      |    | North America | United States | Enteritidis (Predicted) | Enteritidis | 1425  | 21931 |
| SAL_CA9807AA | PNUSA5000090     | SRR1664334 |      |    | North America | United States | Enteritidis (Predicted) | Enteritidis | 1425  | 21930 |
| SAL_CA9808AA | PNUSA5000089     | SRR1664333 |      |    | North America | United States | Enteritidis (Predicted) | Enteritidis | 1425  | 21929 |
| SAL_CA9809AA | PNUSA5000088     | SRR1664332 |      |    | North America | United States | Enteritidis (Predicted) | Enteritidis | 1425  | 21928 |
| SAL_CA9810AA | PNUSA5000087     | SRR1664331 |      |    | North America | United States | Enteritidis (Predicted) | Enteritidis | 1425  | 21927 |
| SAL_CA9811AA | PNUSA5000086     | SRR1664330 |      |    | North America | United States | Enteritidis (Predicted) | Enteritidis | 1425  | 21926 |
| SAL_CA9812AA | PNUSA5000085     | SRR1664329 |      |    | North America | United States | Enteritidis (Predicted) | Enteritidis | 1425  | 21925 |
| SAL_CA9813AA | PNUSA5000084     | SRR1664328 | 2014 | 8  | North America | United States | Enteritidis             | Enteritidis | 1425  | 21924 |
| SAL_CA9814AA | PNUSA5000083     | SRR1664327 | 2014 | 8  | North America | United States | Enteritidis             | Enteritidis | 1425  | 21923 |
| SAL_CA9815AA | PNUSA5000082     | SRR1664326 | 2014 | 8  | North America | United States | Enteritidis             | Enteritidis | 1425  | 21922 |
| SAL_CA9816AA | PNUSA5000081     | SRR1664325 | 2014 | 8  | North America | United States | Enteritidis             | Enteritidis | 1425  | 21921 |
| SAL_CA9817AA | PNUSA5000080     | SRR1664324 | 2014 | 10 | North America | United States | Enteritidis             | Enteritidis | 1425  | 14332 |
| SAL_CA9818AA | PNUSA5000079     | SRR1664323 | 2014 | 8  | North America | United States | Enteritidis             | Enteritidis | 27904 | 21920 |
| SAL_CA9820AA | MDH-2014-01053   | SRR1664320 | 2014 | 11 | North America | United States | Enteritidis             | Enteritidis | 1425  | 21919 |
| SAL_CA9826AA | NY-swgs1539      | SRR1664314 | 2014 | 10 | North America | United States | Enteritidis             | Enteritidis | 1425  | 21916 |
| SAL_CA9830AA | NY-swgs1534      | SRR1664310 | 2014 | 10 | North America | United States | Enteritidis             | Enteritidis | 1425  | 21912 |
| SAL_CA9835AA | MDH-2014-01052   | SRR1664305 | 2014 | 11 | North America | United States | Enteritidis             | Enteritidis | 1425  | 21909 |
| SAL_CA9862AA | NY-swgs1540      | SRR1664278 | 2014 | 11 | North America | United States | Enteritidis             | Enteritidis | 1425  | 21892 |
| SAL_CA9881AA | NY-swgs1538      | SRR1664256 | 2014 | 10 | North America | United States | Enteritidis             | Enteritidis | 1425  | 21875 |
| SAL_CA9886AA | MDH-2014-01029   | SRR1664227 | 2014 | 11 | North America | United States | Enteritidis             | Enteritidis | 1425  | 21871 |
| SAL_CA9892AA | MDH-2014-01050   | SRR1664213 | 2014 | 11 | North America | United States | Enteritidis             | Enteritidis | 3888  | 21865 |
| SAL_CA9896AA | NY-swgs1535      | SRR1664208 | 2014 | 10 | North America | United States | Enteritidis             | Enteritidis | 1425  | 21862 |
| SAL_CA9898AA | MDH-2014-01054   | SRR1664206 | 2014 | 11 | North America | United States | Enteritidis             | Enteritidis | 3888  | 21860 |
| SAL_CA9899AA | MDH-2014-01051   | SRR1664205 | 2014 | 11 | North America | United States | Enteritidis             | Enteritidis | 26775 | 21859 |
| SAL_CA9900AA | NY-swgs1537      | SRR1664204 | 2014 | 10 | North America | United States | Enteritidis             | Enteritidis | 1425  | 21858 |
| SAL_CA9907AA | NY-swgs1536      | SRR1664196 | 2014 | 10 | North America | United States | Enteritidis             | Enteritidis | 1425  | 21853 |
| SAL_CA9923AA | VA-WGS-00364     | SRR1660418 | 2012 | 7  | North America | United States | Enteritidis             | Enteritidis | 1425  | 21839 |
| SAL_CA9932AA | VA-WGS-00400     | SRR1660409 | 2014 | 10 | North America | United States | Enteritidis             | Enteritidis | 1425  | 21830 |
| SAL_DA0044AA | MDH-2014-01022   | SRR1653757 | 2014 | 10 | North America | United States | Enteritidis             | Enteritidis | 1425  | 21738 |
| SAL_DA0045AA | MDH-2014-01018   | SRR1653756 | 2014 | 11 | North America | United States | Enteritidis             | Enteritidis | 3888  | 21735 |
| SAL_DA0046AA | MDH-2014-01017   | SRR1653755 | 2014 | 11 | North America | United States | Enteritidis             | Enteritidis | 1425  | 21737 |
| SAL_DA0047AA | MDH-2014-01016   | SRR1653754 | 2014 | 10 | North America | United States | Enteritidis             | Enteritidis | 1425  | 21736 |

|              |                  |            |      |    |               |                |             |             |      |       |
|--------------|------------------|------------|------|----|---------------|----------------|-------------|-------------|------|-------|
| SAL_DA0048AA | MDH-2014-01021   | SRR1653753 | 2014 | 11 | North America | United States  | Enteritidis | Enteritidis | 3888 | 21735 |
| SAL_DA0050AA | MDH-2014-01015   | SRR1653721 | 2014 | 10 | North America | United States  | Enteritidis | Enteritidis | 1425 | 21733 |
| SAL_DA0052AA | NY-swgs1533      | SRR1653464 | 2014 | 10 | North America | United States  | Enteritidis | Enteritidis | 1425 | 21731 |
| SAL_DA0053AA | NY-swgs1532      | SRR1653463 | 2014 | 10 | North America | United States  | Enteritidis | Enteritidis | 1425 | 21730 |
| SAL_DA0054AA | NY-swgs1531      | SRR1653462 | 2014 | 10 | North America | United States  | Enteritidis | Enteritidis | 1425 | 21729 |
| SAL_DA0055AA | NY-swgs1530      | SRR1653461 | 2014 | 10 | North America | United States  | Enteritidis | Enteritidis | 1425 | 21728 |
| SAL_DA0079AA | FDA00003630      | SRR1653429 | 2010 | 10 | Asia          | Iran           | Anatum      | Enteritidis | 1425 | 21710 |
| SAL_DA0138AA | FDA00000738      | SRR1653366 | 2004 | 11 | Asia          | China          | Enteritidis | Enteritidis | 1425 | 21655 |
| SAL_DA0171AA | PNUSA5000063     | SRR1649580 | 2014 | 10 | North America | United States  | Enteritidis | Enteritidis | 1425 | 21624 |
| SAL_DA0172AA | PNUSA5000062     | SRR1649579 | 2014 | 10 | North America | United States  | Enteritidis | Enteritidis | 1425 | 21623 |
| SAL_DA0173AA | PNUSA5000061     | SRR1649578 | 2014 | 10 | North America | United States  | Enteritidis | Enteritidis | 1425 | 21622 |
| SAL_DA0174AA | PNUSA5000060     | SRR1649577 | 2014 | 10 | North America | United States  | Enteritidis | Enteritidis | 1425 | 14339 |
| SAL_DA0175AA | PNUSA5000059     | SRR1649576 | 2014 | 9  | North America | United States  | Enteritidis | Enteritidis | 1425 | 21621 |
| SAL_DA0234AA | WAPHL_SAL-A00652 | SRR1648171 | 2014 | 9  | North America | United States  | Enteritidis | Enteritidis | 1425 | 19848 |
| SAL_DA0243AA | WAPHL_SAL-A00653 | SRR1648162 | 2014 | 9  | North America | United States  | Enteritidis | Enteritidis | 1425 | 21586 |
| SAL_DA0267AA | AZ-TG74328       | SRR1646946 | 2005 |    | North America | United States  | Enteritidis | Enteritidis | 1425 | 21563 |
| SAL_DA0299AA | AZ-TG74236       | SRR1646583 | 2005 |    | North America | United States  | Enteritidis | Enteritidis | 1425 | 21533 |
| SAL_DA0353AA | FDA00003512      | SRR1646529 | 2010 | 6  | Asia          | Vietnam        | Enteritidis | Enteritidis | 1425 | 21490 |
| SAL_DA0370AA | H130100242       | SRR1646424 | 2012 | 12 | Europe        | United Kingdom | Enteritidis | Enteritidis | 1425 | 21476 |
| SAL_DA0375AA | H130100241       | SRR1646407 | 2012 | 12 | Europe        | United Kingdom | Enteritidis | Enteritidis | 1425 | 21472 |
| SAL_DA0376AA | H122260456       | SRR1646406 | 2012 | 5  | Europe        | United Kingdom | Enteritidis | Enteritidis | 1425 | 21471 |
| SAL_DA0378AA | H121660236       | SRR1646404 | 2012 | 4  | Europe        | United Kingdom | Enteritidis | Enteritidis | 1425 | 21469 |
| SAL_DA0380AA | H121800465       | SRR1646402 | 2012 | 4  | Europe        | United Kingdom | Enteritidis | Enteritidis | 3888 | 21467 |
| SAL_DA0388AA | H122740560       | SRR1646394 | 2012 | 7  | Europe        | United Kingdom | Enteritidis | Enteritidis | 1425 | 21461 |
| SAL_DA0389AA | H123740526       | SRR1646393 | 2012 | 9  | Europe        | United Kingdom | Enteritidis | Enteritidis | 1425 | 21460 |
| SAL_DA0390AA | H123060331       | SRR1646392 | 2012 | 7  | Europe        | United Kingdom | Enteritidis | Enteritidis | 1425 | 21459 |
| SAL_DA0396AA | H122660489       | SRR1646385 | 2012 | 6  | Europe        | United Kingdom | Enteritidis | Enteritidis | 3900 | 21178 |
| SAL_DA0407AA | H121220662       | SRR1646374 | 2012 | 3  | Europe        | United Kingdom | Enteritidis | Enteritidis | 1425 | 21445 |
| SAL_DA0408AA | H124080667       | SRR1646373 | 2012 | 10 | Europe        | United Kingdom | Enteritidis | Enteritidis | 1425 | 21444 |
| SAL_DA0419AA | H124040548       | SRR1646362 | 2012 | 10 | Europe        | United Kingdom | Enteritidis | Enteritidis | 3888 | 21433 |
| SAL_DA0421AA | H124220635       | SRR1646360 | 2012 | 10 | Europe        | United Kingdom | Enteritidis | Enteritidis | 3888 | 21431 |
| SAL_DA0430AA | H123360564       | SRR1646351 | 2012 | 8  | Europe        | United Kingdom | Enteritidis | Enteritidis | 3888 | 21066 |
| SAL_DA0436AA | H124380523       | SRR1646289 | 2012 | 10 |               |                | Enteritidis | Enteritidis | 3982 | 21417 |
| SAL_DA0444AA | H121380297       | SRR1646281 | 2012 | 3  | Europe        | United Kingdom | Enteritidis | Enteritidis | 3888 | 21410 |
| SAL_DA0445AA | H122940335       | SRR1646280 | 2012 | 7  | Europe        | United Kingdom | Enteritidis | Enteritidis | 1425 | 21409 |
| SAL_DA0447AA | H123980391       | SRR1646278 | 2012 | 9  | 17 Europe     | United Kingdom | Enteritidis | Enteritidis | 1425 | 21407 |
| SAL_DA0454AA | H123420629       | SRR1646271 | 2012 | 8  | Europe        | United Kingdom | Enteritidis | Enteritidis | 3888 | 21401 |
| SAL_DA0459AA | H124740804       | SRR1646265 | 2012 | 11 | Europe        | United Kingdom | Enteritidis | Enteritidis | 1425 | 20758 |
| SAL_DA0467AA | H124260481       | SRR1646256 | 2012 | 10 | Europe        | United Kingdom | Enteritidis | Enteritidis | 3888 | 21390 |
| SAL_DA0471AA | H124420608       | SRR1646252 | 2012 | 10 | Europe        | United Kingdom | Enteritidis | Enteritidis | 1425 | 21386 |
| SAL_DA0472AA | H123340556       | SRR1646251 | 2012 | 8  | Europe        | United Kingdom | Enteritidis | Enteritidis | 1425 | 21385 |
| SAL_DA0474AA | H122080470       | SRR1646249 | 2012 | 5  | Europe        | United Kingdom | Enteritidis | Enteritidis | 1425 | 21384 |
| SAL_DA0480AA | H120540611       | SRR1646243 | 2012 | 2  | 1 Europe      | United Kingdom | Enteritidis | Enteritidis | 1425 | 21378 |
| SAL_DA0483AA | H120580508       | SRR1646240 | 2012 | 2  | Europe        | United Kingdom | Enteritidis | Enteritidis | 1425 | 21375 |
| SAL_DA0484AA | H124380528       | SRR1646239 | 2012 | 10 | Europe        | United Kingdom | Enteritidis | Enteritidis | 1425 | 21374 |
| SAL_DA0487AA | H123560713       | SRR1646236 | 2012 | 8  | Europe        | United Kingdom | Enteritidis | Enteritidis | 1425 | 21371 |
| SAL_DA0498AA | H122540674       | SRR1646225 | 2012 | 6  | Europe        | United Kingdom | Enteritidis | Enteritidis | 3888 | 21360 |
| SAL_DA0499AA | H122880621       | SRR1646224 | 2012 | 7  | Europe        | United Kingdom | Enteritidis | Enteritidis | 1425 | 21359 |
| SAL_DA0500AA | H124180493       | SRR1646223 | 2012 | 10 | Europe        | United Kingdom | Enteritidis | Enteritidis | 1425 | 21358 |
| SAL_DA0502AA | H124780465       | SRR1646206 | 2012 | 11 | Europe        | United Kingdom | Enteritidis | Enteritidis | 1425 | 21356 |
| SAL_DA0508AA | H123120722       | SRR1646200 | 2012 | 7  | Europe        | United Kingdom | Enteritidis | Enteritidis | 3888 | 21351 |
| SAL_DA0511AA | H122580623       | SRR1646197 | 2012 | 6  | Europe        | United Kingdom | Enteritidis | Enteritidis | 1425 | 21349 |
| SAL_DA0516AA | H124000530       | SRR1646192 | 2012 | 10 | Europe        | United Kingdom | Enteritidis | Enteritidis | 3969 | 21344 |
| SAL_DA0521AA | H123800458       | SRR1646175 | 2012 | 9  | Europe        | United Kingdom | Enteritidis | Enteritidis | 3888 | 12624 |
| SAL_DA0522AA | H122460487       | SRR1646174 | 2012 | 6  | Europe        | United Kingdom | Enteritidis | Enteritidis | 1425 | 21339 |
| SAL_DA0526AA | H121660235       | SRR1646170 | 2012 | 4  |               |                | Enteritidis | Enteritidis | 1425 | 21335 |
| SAL_DA0527AA | H122940328       | SRR1646169 | 2012 | 7  | Europe        | United Kingdom | Enteritidis | Enteritidis | 3888 | 20809 |
| SAL_DA0529AA | H120440464       | SRR1646167 | 2012 | 1  | Europe        | United Kingdom | Enteritidis | Enteritidis | 1425 | 21333 |
| SAL_DA0532AA | H123380358       | SRR1646164 | 2012 | 8  |               |                | Enteritidis | Enteritidis | 1425 | 21330 |



|              |            |            |      |    |           |                |             |             |       |       |
|--------------|------------|------------|------|----|-----------|----------------|-------------|-------------|-------|-------|
| SAL_DA0541AA | H124400512 | SRR1646155 | 2012 | 10 | Europe    | United Kingdom | Enteritidis | Enteritidis | 1425  | 21321 |
| SAL_DA0558AA | H124020505 | SRR1646138 | 2012 | 10 | Europe    | United Kingdom | Enteritidis | Enteritidis | 1425  | 21306 |
| SAL_DA0563AA | H122420304 | SRR1646133 | 2012 | 6  | 7 Europe  | United Kingdom | Enteritidis | Enteritidis | 1425  | 21303 |
| SAL_DA0570AA | H124360215 | SRR1646126 | 2012 | 10 | Europe    | United Kingdom | Enteritidis | Enteritidis | 1425  | 21296 |
| SAL_DA0573AA | H123540624 | SRR1646123 | 2012 | 8  | Europe    | United Kingdom | Enteritidis | Enteritidis | 26142 | 21293 |
| SAL_DA0580AA | H123780494 | SRR1646116 | 2012 | 9  | Europe    | United Kingdom | Enteritidis | Enteritidis | 1425  | 21286 |
| SAL_DA0585AA | H123440411 | SRR1646111 | 2012 | 8  | Europe    | United Kingdom | Enteritidis | Enteritidis | 1425  | 21282 |
| SAL_DA0597AA | H123640722 | SRR1646099 | 2012 | 9  |           |                | Enteritidis | Enteritidis | 3941  | 21271 |
| SAL_DA0609AA | H123800462 | SRR1646086 | 2012 | 9  | Europe    | United Kingdom | Enteritidis | Enteritidis | 1425  | 21260 |
| SAL_DA0610AA | H121220667 | SRR1646085 | 2012 | 3  | Europe    | United Kingdom | Enteritidis | Enteritidis | 1425  | 21259 |
| SAL_DA0611AA | H124300159 | SRR1646084 | 2012 | 10 | Europe    | United Kingdom | Enteritidis | Enteritidis | 26142 | 21258 |
| SAL_DA0612AA | H130220269 | SRR1646083 | 2013 | 1  | Europe    | United Kingdom | Enteritidis | Enteritidis | 1425  | 21257 |
| SAL_DA0616AA | H123020532 | SRR1646079 | 2012 | 7  | Europe    | United Kingdom | Enteritidis | Enteritidis | 3888  | 20675 |
| SAL_DA0620AA | H123300317 | SRR1646075 | 2012 | 8  | Europe    | United Kingdom | Enteritidis | Enteritidis | 3906  | 21250 |
| SAL_DA0621AA | H123120717 | SRR1646074 | 2012 | 7  | Europe    | United Kingdom | Enteritidis | Enteritidis | 1425  | 21249 |
| SAL_DA0627AA | H123340537 | SRR1646068 | 2012 | 8  | Europe    | United Kingdom | Enteritidis | Enteritidis | 1425  | 21243 |
| SAL_DA0631AA | H123120716 | SRR1646064 | 2012 | 7  | Europe    | United Kingdom | Enteritidis | Enteritidis | 3888  | 21239 |
| SAL_DA0634AA | H122540665 | SRR1646061 | 2012 | 6  | Europe    | United Kingdom | Enteritidis | Enteritidis | 1425  | 21158 |
| SAL_DA0635AA | H123140502 | SRR1646060 | 2012 | 8  | Europe    | United Kingdom | Enteritidis | Enteritidis | 3888  | 21236 |
| SAL_DA0641AA | H124920540 | SRR1646054 | 2012 | 12 | Europe    | United Kingdom | Enteritidis | Enteritidis | 1425  | 21230 |
| SAL_DA0662AA | H123220510 | SRR1646011 | 2012 | 8  | Europe    | United Kingdom | Enteritidis | Enteritidis | 1425  | 21209 |
| SAL_DA0664AA | H122980207 | SRR1646009 | 2012 | 7  | Europe    | United Kingdom | Enteritidis | Enteritidis | 3888  | 21207 |
| SAL_DA0667AA | H123120707 | SRR1646006 | 2012 | 7  | Europe    | United Kingdom | Enteritidis | Enteritidis | 1425  | 21204 |
| SAL_DA0673AA | H123800455 | SRR1646000 | 2012 | 9  | Europe    | United Kingdom | Enteritidis | Enteritidis | 3963  | 21198 |
| SAL_DA0680AA | H122880601 | SRR1645993 | 2012 | 7  | Europe    | United Kingdom | Enteritidis | Enteritidis | 3888  | 21192 |
| SAL_DA0683AA | H123760523 | SRR1645990 | 2012 | 9  | Europe    | United Kingdom | Enteritidis | Enteritidis | 1425  | 21190 |
| SAL_DA0696AA | H122580622 | SRR1645977 | 2012 | 6  | Europe    | United Kingdom | Enteritidis | Enteritidis | 3900  | 21178 |
| SAL_DA0697AA | H123980394 | SRR1645976 | 2012 | 9  | Europe    | United Kingdom | Enteritidis | Enteritidis | 1425  | 21177 |
| SAL_DA0698AA | H124740793 | SRR1645975 | 2012 | 11 | Europe    | United Kingdom | Enteritidis | Enteritidis | 1425  | 21176 |
| SAL_DA0701AA | H123940584 | SRR1645972 | 2012 | 9  | Europe    | United Kingdom | Enteritidis | Enteritidis | 1425  | 21173 |
| SAL_DA0711AA | H124420605 | SRR1645962 | 2012 | 10 | Europe    | United Kingdom | Enteritidis | Enteritidis | 3888  | 21163 |
| SAL_DA0712AA | H123760538 | SRR1645961 | 2012 | 9  | Europe    | United Kingdom | Enteritidis | Enteritidis | 3961  | 21162 |
| SAL_DA0716AA | H122460435 | SRR1645957 | 2012 | 6  | Europe    | United Kingdom | Enteritidis | Enteritidis | 1425  | 21158 |
| SAL_DA0725AA | H121540989 | SRR1645948 | 2012 | 4  | Europe    | United Kingdom | Enteritidis | Enteritidis | 1425  | 21149 |
| SAL_DA0726AA | H124860435 | SRR1645947 | 2012 | 11 | Europe    | United Kingdom | Enteritidis | Enteritidis | -1733 | 21148 |
| SAL_DA0730AA | H124760740 | SRR1645943 | 2012 | 11 | Europe    | United Kingdom | Enteritidis | Enteritidis | 3888  | 21145 |
| SAL_DA0735AA | H122260447 | SRR1645938 | 2012 | 5  | Europe    | United Kingdom | Enteritidis | Enteritidis | 1425  | 21140 |
| SAL_DA0741AA | H124200164 | SRR1645932 | 2012 | 10 | Europe    | United Kingdom | Enteritidis | Enteritidis | 1425  | 21134 |
| SAL_DA0742AA | H123740506 | SRR1645931 | 2012 | 9  | Europe    | United Kingdom | Enteritidis | Enteritidis | 1425  | 21133 |
| SAL_DA0745AA | H124340362 | SRR1645928 | 2012 | 10 | Europe    | United Kingdom | Enteritidis | Enteritidis | 1425  | 21131 |
| SAL_DA0747AA | H122440435 | SRR1645926 | 2012 | 6  | Europe    | United Kingdom | Enteritidis | Enteritidis | 3888  | 21129 |
| SAL_DA0748AA | H120860350 | SRR1645925 | 2012 | 2  | Europe    | United Kingdom | Enteritidis | Enteritidis | 1425  | 21128 |
| SAL_DA0750AA | H123060362 | SRR1645923 | 2012 | 7  | Europe    | United Kingdom | Enteritidis | Enteritidis | 1425  | 21127 |
| SAL_DA0752AA | H123520427 | SRR1645921 | 2012 | 8  | Europe    | United Kingdom | Enteritidis | Enteritidis | 1425  | 21126 |
| SAL_DA0759AA | H124240337 | SRR1645914 | 2012 | 10 | Europe    | United Kingdom | Enteritidis | Enteritidis | 1425  | 21118 |
| SAL_DA0766AA | H123600580 | SRR1645907 | 2012 | 9  | Europe    | United Kingdom | Enteritidis | Enteritidis | 1425  | 21112 |
| SAL_DA0775AA | H122280366 | SRR1645898 | 2012 | 5  | 29 Europe | United Kingdom | Enteritidis | Enteritidis | 1425  | 21103 |
| SAL_DA0776AA | H122540696 | SRR1645897 | 2012 | 6  |           |                | Enteritidis | Enteritidis | 1425  | 21102 |
| SAL_DA0777AA | H123340536 | SRR1645896 | 2012 | 8  | Europe    | United Kingdom | Enteritidis | Enteritidis | 1425  | 21101 |
| SAL_DA0778AA | H123360592 | SRR1645895 | 2012 | 8  | Europe    | United Kingdom | Enteritidis | Enteritidis | 3888  | 21100 |
| SAL_DA0796AA | H122540669 | SRR1645877 | 2012 | 6  | 16 Europe | United Kingdom | Enteritidis | Enteritidis | 1425  | 21083 |
| SAL_DA0799AA | H123380359 | SRR1645874 | 2012 | 8  |           |                | Enteritidis | Enteritidis | 1425  | 21080 |
| SAL_DA0814AA | H123400445 | SRR1645851 | 2012 | 8  | Europe    | United Kingdom | Enteritidis | Enteritidis | 3888  | 21066 |
| SAL_DA0821AA | H123320606 | SRR1645844 | 2012 | 8  | Europe    | United Kingdom | Enteritidis | Enteritidis | 3888  | 21059 |
| SAL_DA0827AA | H122720544 | SRR1645838 | 2012 | 7  | Europe    | United Kingdom | Enteritidis | Enteritidis | 3888  | 21054 |
| SAL_DA0838AA | H122880692 | SRR1645827 | 2012 | 7  | Europe    | United Kingdom | Enteritidis | Enteritidis | 1425  | 21044 |
| SAL_DA0841AA | H123300320 | SRR1645824 | 2012 | 8  | Europe    | United Kingdom | Enteritidis | Enteritidis | 1425  | 21041 |
| SAL_DA0842AA | H125140343 | SRR1645823 | 2012 | 12 | Europe    | United Kingdom | Enteritidis | Enteritidis | 1425  | 21040 |
| SAL_DA0844AA | H123420612 | SRR1645821 | 2012 | 8  | Europe    | United Kingdom | Enteritidis | Enteritidis | 1425  | 20186 |

|              |            |            |      |    |           |                |             |             |      |       |
|--------------|------------|------------|------|----|-----------|----------------|-------------|-------------|------|-------|
| SAL_DA0845AA | H121080598 | SRR1645820 | 2012 | 3  | Europe    | United Kingdom | Enteritidis | Enteritidis | 1425 | 21038 |
| SAL_DA0851AA | H122100471 | SRR1645814 | 2012 | 5  | Europe    | United Kingdom | Enteritidis | Enteritidis | 3888 | 21032 |
| SAL_DA0858AA | H120440462 | SRR1645807 | 2012 | 1  | Europe    | United Kingdom | Enteritidis | Enteritidis | 1425 | 21025 |
| SAL_DA0864AA | H123560705 | SRR1645801 | 2012 | 8  | Europe    | United Kingdom | Enteritidis | Enteritidis | 3888 | 21020 |
| SAL_DA0872AA | H123420621 | SRR1645793 | 2012 | 8  | Europe    | United Kingdom | Enteritidis | Enteritidis | 1425 | 21013 |
| SAL_DA0876AA | H122720531 | SRR1645789 | 2012 | 7  | Europe    | United Kingdom | Enteritidis | Enteritidis | 3906 | 21009 |
| SAL_DA0883AA | H123580521 | SRR1645782 | 2012 | 8  | 22 Europe | United Kingdom | Enteritidis | Enteritidis | 1425 | 21002 |
| SAL_DA0887AA | H123900517 | SRR1645778 | 2012 | 9  | Europe    | United Kingdom | Enteritidis | Enteritidis | 3949 | 20998 |
| SAL_DA0900AA | H123640725 | SRR1645765 | 2012 | 9  | Europe    | United Kingdom | Enteritidis | Enteritidis | 1425 | 20988 |
| SAL_DA0905AA | H121940508 | SRR1645760 | 2012 | 5  | Europe    | United Kingdom | Enteritidis | Enteritidis | 1425 | 20983 |
| SAL_DA0908AA | H120880463 | SRR1645757 | 2012 | 2  | Europe    | United Kingdom | Enteritidis | Enteritidis | 3888 | 20980 |
| SAL_DA0909AA | H122240473 | SRR1645756 | 2012 | 5  | Europe    | United Kingdom | Enteritidis | Enteritidis | 1425 | 20979 |
| SAL_DA0914AA | H122680469 | SRR1645751 | 2012 | 6  | Europe    | United Kingdom | Enteritidis | Enteritidis | 1425 | 20974 |
| SAL_DA0916AA | H123480491 | SRR1645749 | 2012 | 8  | Europe    | United Kingdom | Enteritidis | Enteritidis | 1425 | 20972 |
| SAL_DA0923AA | H121760528 | SRR1645742 | 2012 | 4  |           |                | Enteritidis | Enteritidis | 1425 | 20966 |
| SAL_DA0927AA | H123280504 | SRR1645738 | 2012 | 8  | Europe    | United Kingdom | Enteritidis | Enteritidis | 3888 | 20963 |
| SAL_DA0937AA | H125060662 | SRR1645728 | 2012 | 12 | Europe    | United Kingdom | Enteritidis | Enteritidis | 1425 | 20954 |
| SAL_DA0938AA | H123560767 | SRR1645727 | 2012 | 8  | Europe    | United Kingdom | Enteritidis | Enteritidis | 1425 | 20953 |
| SAL_DA0952AA | H124020450 | SRR1645649 | 2012 | 10 | Europe    | United Kingdom | Enteritidis | Enteritidis | 3888 | 20944 |
| SAL_DA0953AA | H122740577 | SRR1645648 | 2012 | 7  | Europe    | United Kingdom | Enteritidis | Enteritidis | 1425 | 20943 |
| SAL_DA0958AA | H120720534 | SRR1645643 | 2012 | 2  | Europe    | United Kingdom | Enteritidis | Enteritidis | 1425 | 20938 |
| SAL_DA0960AA | H122820788 | SRR1645641 | 2012 | 7  | Europe    | United Kingdom | Enteritidis | Enteritidis | 1425 | 20936 |
| SAL_DA0977AA | H124400517 | SRR1645602 | 2012 | 10 | Europe    | United Kingdom | Enteritidis | Enteritidis | 3888 | 20921 |
| SAL_DA0979AA | H123420628 | SRR1645600 | 2012 | 8  | Europe    | United Kingdom | Enteritidis | Enteritidis | 1425 | 20919 |
| SAL_DA0990AA | H121940486 | SRR1645582 | 2012 | 5  | Europe    | United Kingdom | Enteritidis | Enteritidis | 1425 | 20909 |
| SAL_DA0991AA | H123600545 | SRR1645581 | 2012 | 9  | Europe    | United Kingdom | Enteritidis | Enteritidis | 3888 | 20169 |
| SAL_DA0993AA | H122820782 | SRR1645579 | 2012 | 7  | Europe    | United Kingdom | Enteritidis | Enteritidis | 3906 | 20907 |
| SAL_DA0998AA | H121980557 | SRR1645574 | 2012 | 5  | Europe    | United Kingdom | Enteritidis | Enteritidis | 1425 | 20902 |
| SAL_DA1016AA | H123440412 | SRR1645556 | 2012 | 8  | Europe    | United Kingdom | Enteritidis | Enteritidis | 3888 | 20884 |
| SAL_DA1022AA | H122780286 | SRR1645550 | 2012 | 7  | Europe    | United Kingdom | Enteritidis | Enteritidis | 1425 | 20878 |
| SAL_DA1024AA | H124640511 | SRR1645548 | 2012 | 11 | Europe    | United Kingdom | Enteritidis | Enteritidis | 3888 | 20876 |
| SAL_DA1026AA | H123640721 | SRR1645546 | 2012 | 9  | Europe    | United Kingdom | Enteritidis | Enteritidis | 3888 | 20874 |
| SAL_DA1029AA | H123160664 | SRR1645543 | 2012 | 8  | Europe    | United Kingdom | Enteritidis | Enteritidis | 3888 | 20871 |
| SAL_DA1040AA | H124840245 | SRR1645532 | 2012 | 11 | Europe    | United Kingdom | Enteritidis | Enteritidis | 3888 | 20861 |
| SAL_DA1051AA | H124020441 | SRR1645464 | 2012 | 10 | Europe    | United Kingdom | Enteritidis | Enteritidis | 1425 | 20851 |
| SAL_DA1063AA | H124340310 | SRR1645452 | 2012 | 10 | Europe    | United Kingdom | Enteritidis | Enteritidis | 3888 | 20839 |
| SAL_DA1065AA | H122920419 | SRR1645450 | 2012 | 7  | Europe    | United Kingdom | Enteritidis | Enteritidis | 3888 | 20838 |
| SAL_DA1066AA | H120240588 | SRR1645449 | 2012 | 1  | Europe    | United Kingdom | Enteritidis | Enteritidis | 1425 | 20837 |
| SAL_DA1070AA | H123740519 | SRR1645445 | 2012 | 9  | 3 Europe  | United Kingdom | Enteritidis | Enteritidis | 1425 | 20833 |
| SAL_DA1075AA | H123540642 | SRR1645440 | 2012 | 8  | Europe    | United Kingdom | Enteritidis | Enteritidis | 3888 | 20828 |
| SAL_DA1080AA | H122360417 | SRR1645435 | 2012 | 6  | Europe    | United Kingdom | Enteritidis | Enteritidis | 3897 | 20823 |
| SAL_DA1083AA | H120860352 | SRR1645432 | 2012 | 2  | Europe    | United Kingdom | Enteritidis | Enteritidis | 1425 | 20820 |
| SAL_DA1094AA | H123060335 | SRR1645396 | 2012 | 7  | Europe    | United Kingdom | Enteritidis | Enteritidis | 3888 | 20809 |
| SAL_DA1095AA | H121760530 | SRR1645395 | 2012 | 4  | Europe    | United Kingdom | Enteritidis | Enteritidis | 1425 | 20808 |
| SAL_DA1117AA | H122860674 | SRR1645373 | 2012 | 7  | Europe    | United Kingdom | Enteritidis | Enteritidis | 3914 | 20788 |
| SAL_DA1125AA | H124900685 | SRR1645365 | 2012 | 12 | Europe    | United Kingdom | Enteritidis | Enteritidis | 1425 | 20780 |
| SAL_DA1139AA | H123160634 | SRR1645351 | 2012 | 8  | Europe    | United Kingdom | Enteritidis | Enteritidis | 3888 | 20766 |
| SAL_DA1147AA | H122740562 | SRR1645343 | 2012 | 7  | Europe    | United Kingdom | Enteritidis | Enteritidis | 3888 | 20169 |
| SAL_DA1148AA | H122400345 | SRR1645338 | 2012 | 6  |           |                | Enteritidis | Enteritidis | 1425 | 20758 |
| SAL_DA1150AA | H123400449 | SRR1645335 | 2012 | 8  | Europe    | United Kingdom | Enteritidis | Enteritidis | 3888 | 20756 |
| SAL_DA1156AA | H123340544 | SRR1645326 | 2012 | 8  | Europe    | United Kingdom | Enteritidis | Enteritidis | 1425 | 20750 |
| SAL_DA1160AA | H124120610 | SRR1645295 | 2012 | 10 | Europe    | United Kingdom | Enteritidis | Enteritidis | 1425 | 20746 |
| SAL_DA1176AA | H123860321 | SRR1645271 | 2012 | 9  | Europe    | United Kingdom | Enteritidis | Enteritidis | 1425 | 20731 |
| SAL_DA1181AA | H123740522 | SRR1645266 | 2012 | 9  | Europe    | United Kingdom | Enteritidis | Enteritidis | 3888 | 20726 |
| SAL_DA1183AA | H122660488 | SRR1645264 | 2012 | 6  | Europe    | United Kingdom | Enteritidis | Enteritidis | 1425 | 20724 |
| SAL_DA1186AA | H122040338 | SRR1645257 | 2012 | 5  | Europe    | United Kingdom | Enteritidis | Enteritidis | 1425 | 20721 |
| SAL_DA1189AA | H124760731 | SRR1645253 | 2012 | 11 | Europe    | United Kingdom | Enteritidis | Enteritidis | 1425 | 20718 |
| SAL_DA1190AA | H122380504 | SRR1645252 | 2012 | 6  | Europe    | United Kingdom | Enteritidis | Enteritidis | 1425 | 20717 |
| SAL_DA1192AA | H120980502 | SRR1645250 | 2012 | 3  | Europe    | United Kingdom | Enteritidis | Enteritidis | 1425 | 20715 |

|              |                  |            |      |    |               |                |                         |             |       |       |
|--------------|------------------|------------|------|----|---------------|----------------|-------------------------|-------------|-------|-------|
| SAL_DA1193AA | H121420346       | SRR1645249 | 2012 | 4  | Europe        | United Kingdom | Enteritidis             | Enteritidis | 1425  | 20714 |
| SAL_DA1200AA | H124000535       | SRR1645242 | 2012 | 10 | Europe        | United Kingdom | Enteritidis             | Enteritidis | 1425  | 20708 |
| SAL_DA1201AA | H123640728       | SRR1645241 | 2012 | 9  | Europe        | United Kingdom | Enteritidis             | Enteritidis | 1425  | 20707 |
| SAL_DA1202AA | H123540620       | SRR1645240 | 2012 | 8  | Europe        | United Kingdom | Enteritidis             | Enteritidis | 3941  | 20706 |
| SAL_DA1209AA | H121860585       | SRR1645233 | 2012 | 5  | Europe        | United Kingdom | Enteritidis             | Enteritidis | 1425  | 20700 |
| SAL_DA1210AA | H121960504       | SRR1645232 | 2012 | 5  | Europe        | United Kingdom | Enteritidis             | Enteritidis | 1425  | 20699 |
| SAL_DA1219AA | H122660493       | SRR1645223 | 2012 | 6  | Europe        | United Kingdom | Enteritidis             | Enteritidis | 3888  | 20190 |
| SAL_DA1235AA | H123060355       | SRR1645207 | 2012 | 7  | Europe        | United Kingdom | Enteritidis             | Enteritidis | 3888  | 20675 |
| SAL_DA1241AA | H122420299       | SRR1645200 | 2012 | 6  | Europe        | United Kingdom | Enteritidis             | Enteritidis | 1425  | 20669 |
| SAL_DA1244AA | H122620655       | SRR1645197 | 2012 | 6  | Europe        | United Kingdom | Enteritidis             | Enteritidis | 3888  | 20666 |
| SAL_DA1245AA | H123220515       | SRR1645196 | 2012 | 8  | Europe        | United Kingdom | Enteritidis             | Enteritidis | 1425  | 20665 |
| SAL_DA1256AA | H125140342       | SRR1645185 | 2012 | 12 | Europe        | United Kingdom | Enteritidis             | Enteritidis | 1425  | 20654 |
| SAL_DA1263AA | H123540621       | SRR1645178 | 2012 | 8  | Europe        | United Kingdom | Enteritidis             | Enteritidis | 1425  | 20649 |
| SAL_DA1278AA | H124040553       | SRR1645163 | 2012 | 10 | Europe        | United Kingdom | Enteritidis             | Enteritidis | 1425  | 20634 |
| SAL_DA1281AA | H124140614       | SRR1645160 | 2012 | 10 | Europe        | United Kingdom | Enteritidis             | Enteritidis | 3888  | 20631 |
| SAL_DA1295AA | H124080630       | SRR1645145 | 2012 | 10 | Europe        | United Kingdom | Enteritidis             | Enteritidis | 1425  | 20619 |
| SAL_DA1300AA | H124220625       | SRR1645140 | 2012 | 10 | Europe        | United Kingdom | Enteritidis             | Enteritidis | 1425  | 20614 |
| SAL_DA1306AA | NY-swgs1525      | SRR1645058 | 2014 | 10 | North America | United States  | Enteritidis             | Enteritidis | 1425  | 20608 |
| SAL_DA1309AA | NY-swgs1523      | SRR1645055 | 2014 | 10 | North America | United States  | Enteritidis             | Enteritidis | 1425  | 20605 |
| SAL_DA1310AA | NY-swgs1522      | SRR1645054 | 2014 | 9  | North America | United States  | Enteritidis             | Enteritidis | 1425  | 20604 |
| SAL_DA1312AA | NY-swgs1526      | SRR1644560 | 2014 | 10 | North America | United States  | Enteritidis             | Enteritidis | 1425  | 2690  |
| SAL_DA1315AA | NY-swgs1527      | SRR1644554 | 2014 | 10 | North America | United States  | Enteritidis             | Enteritidis | 1425  | 11696 |
| SAL_DA1318AA | NY-swgs1524      | SRR1644550 | 2014 | 10 | North America | United States  | Enteritidis             | Enteritidis | 1425  | 20598 |
| SAL_DA1442AA | MDH-2014-00966   | SRR1576830 | 2014 | 9  | North America | United States  | Enteritidis             | Enteritidis | 8003  | 12492 |
| SAL_DA1541AA | FDA00003515      | SRR1638891 | 2011 | 10 | North America | United States  | Enteritidis             | Enteritidis | 1425  | 20396 |
| SAL_DA1542AA | MDH-2014-01007   | SRR1638888 | 2014 | 10 | North America | United States  | Enteritidis             | Enteritidis | 1425  | 20395 |
| SAL_DA1544AA | FDA00003516      | SRR1638862 | 2011 | 10 | North America | United States  | Enteritidis             | Enteritidis | 1425  | 20394 |
| SAL_DA1552AA | MDH-2014-01008   | SRR1638449 | 2014 | 10 | North America | United States  | Enteritidis             | Enteritidis | 1425  | 20387 |
| SAL_DA1615AA | WAPHL_SAL-A00659 | SRR1636990 | 2014 | 7  | North America | United States  | Enteritidis             | Enteritidis | 1425  | 19175 |
| SAL_DA1703AA | NY-swgs1521      | SRR1636569 | 2014 | 10 | North America | United States  | Enteritidis             | Enteritidis | 8183  | 20269 |
| SAL_DA1704AA | NY-swgs1519      | SRR1636568 | 2014 | 10 | North America | United States  | Enteritidis             | Enteritidis | 1425  | 20268 |
| SAL_DA1709AA | NY-swgs1518      | SRR1636563 | 2014 | 10 | North America | United States  | Enteritidis             | Enteritidis | 26832 | 20259 |
| SAL_DA1716AA | NY-swgs1520      | SRR1636556 | 2014 | 10 | North America | United States  | Enteritidis             | Enteritidis | 26832 | 20259 |
| SAL_DA1723AA | NY-swgs1515      | SRR1636549 | 2014 | 9  | North America | United States  | Enteritidis             | Enteritidis | 1425  | 20254 |
| SAL_DA1724AA | NY-swgs1514      | SRR1636548 | 2014 | 9  | North America | United States  | Enteritidis             | Enteritidis | 1425  | 20254 |
| SAL_DA1726AA | NY-swgs1517      | SRR1636546 | 2014 | 9  | North America | United States  | Enteritidis             | Enteritidis | 1425  | 18599 |
| SAL_DA1747AA | NY-swgs1516      | SRR1636522 | 2014 | 9  | North America | United States  | Enteritidis             | Enteritidis | 1425  | 18599 |
| SAL_DA1759AA | H120960556       | SRR1635128 | 2012 | 3  | Europe        | United Kingdom | Enteritidis             | Enteritidis | 3888  | 20225 |
| SAL_DA1769AA | H121760556       | SRR1635118 | 2012 | 4  | Europe        | United Kingdom | Enteritidis             | Enteritidis | 1425  | 20215 |
| SAL_DA1771AA | H121220661       | SRR1635116 | 2012 | 3  | Europe        | United Kingdom | Enteritidis             | Enteritidis | 1425  | 20213 |
| SAL_DA1772AA | H122800341       | SRR1635115 | 2012 | 7  | Europe        | United Kingdom | Enteritidis             | Enteritidis | 1425  | 20212 |
| SAL_DA1773AA | H123940649       | SRR1635114 | 2012 | 9  | 21 Europe     | United Kingdom | Enteritidis             | Enteritidis | 1425  | 20211 |
| SAL_DA1774AA | H121840555       | SRR1635113 | 2012 | 5  | Europe        | United Kingdom | Enteritidis (Predicted) | Enteritidis | 1425  | 20210 |
| SAL_DA1784AA | H121560545       | SRR1635103 | 2012 | 4  | Europe        | United Kingdom | Enteritidis             | Enteritidis | 1425  | 20200 |
| SAL_DA1786AA | H124040561       | SRR1635101 | 2012 | 10 | Europe        | United Kingdom | Enteritidis (Predicted) | Enteritidis | 3888  | 12619 |
| SAL_DA1790AA | H124680351       | SRR1635097 | 2012 | 11 | 7 Europe      | United Kingdom | Enteritidis             | Enteritidis | 1425  | 20195 |
| SAL_DA1795AA | H122820787       | SRR1635092 | 2012 | 7  | Europe        | United Kingdom | Enteritidis             | Enteritidis | 3888  | 20190 |
| SAL_DA1799AA | H122600589       | SRR1635087 | 2012 | 6  | Europe        | United Kingdom | Enteritidis             | Enteritidis | 1425  | 20186 |
| SAL_DA1811AA | H124260464       | SRR1635072 | 2012 | 10 | Europe        | United Kingdom | Enteritidis             | Enteritidis | 3888  | 20174 |
| SAL_DA1815AA | H123660400       | SRR1635066 | 2012 | 9  | Europe        | United Kingdom | Enteritidis             | Enteritidis | 1425  | 20170 |
| SAL_DA1816AA | H123560722       | SRR1635065 | 2012 | 8  | Europe        | United Kingdom | Enteritidis             | Enteritidis | 3888  | 20169 |
| SAL_DA1818AA | H124220640       | SRR1635060 | 2012 | 10 | Europe        | United Kingdom | Enteritidis             | Enteritidis | 3888  | 20167 |
| SAL_DA1828AA | 2014K-0491       | SRR1634588 | 2014 | 4  | North America | United States  | Enteritidis             | Enteritidis | 1425  | 19984 |
| SAL_DA1851AA | FDA00000127      | SRR1633876 | 2001 | 9  | Asia          | China          | Enteritidis             | Enteritidis | 1425  | 20143 |
| SAL_DA1858AA | MDH-2014-00987   | SRR1633867 | 2014 | 10 | North America | United States  | Enteritidis             | Enteritidis | 1425  | 20138 |
| SAL_DA1859AA | NY-swgs1513      | SRR1633866 | 2014 | 9  | North America | United States  | Enteritidis             | Enteritidis | 1425  | 651   |
| SAL_DA1870AA | MDH-2014-00986   | SRR1633854 | 2014 | 10 | North America | United States  | Enteritidis             | Enteritidis | 1425  | 20130 |
| SAL_DA1874AA | MDH-2014-00981   | SRR1633846 | 2014 | 10 | North America | United States  | Enteritidis             | Enteritidis | 1425  | 18563 |
| SAL_DA1878AA | MDH-2014-00983   | SRR1633553 | 2014 | 10 | North America | United States  | Enteritidis             | Enteritidis | 1425  | 18563 |

|              |                  |            |      |    |               |               |                         |             |       |       |
|--------------|------------------|------------|------|----|---------------|---------------|-------------------------|-------------|-------|-------|
| SAL_DA1879AA | NY-swgs1504      | SRR1633549 | 2014 | 9  | North America | United States | Enteritidis             | Enteritidis | 1425  | 20123 |
| SAL_DA1883AA | MDH-2014-00998   | SRR1633540 | 2014 | 10 | North America | United States | Enteritidis             | Enteritidis | 1425  | 18563 |
| SAL_DA1884AA | MDH-2014-00996   | SRR1633539 | 2014 | 10 | North America | United States | Enteritidis             | Enteritidis | 1425  | 20119 |
| SAL_DA1885AA | NY-swgs1507      | SRR1633536 | 2014 | 9  | North America | United States | Enteritidis             | Enteritidis | 1425  | 20118 |
| SAL_DA1886AA | FCC0185          | SRR1633535 | 2010 | 10 | North America | United States | Enteritidis             | Enteritidis | 1425  | 20117 |
| SAL_DA1887AA | MDH-2014-01002   | SRR1633534 | 2014 | 10 | North America | United States | Enteritidis             | Enteritidis | 1425  | 18563 |
| SAL_DA1889AA | MDH-2014-00902   | SRR1633529 | 2014 | 7  | North America | United States | Enteritidis             | Enteritidis | 1425  | 20115 |
| SAL_DA1892AA | MDH-2014-00984   | SRR1633526 | 2014 | 10 | North America | United States | Enteritidis             | Enteritidis | 1425  | 18563 |
| SAL_DA1895AA | MDH-2014-01000   | SRR1633522 | 2014 | 10 | North America | United States | Enteritidis             | Enteritidis | 1425  | 20111 |
| SAL_DA1896AA | MDH-2014-00999   | SRR1633521 | 2014 | 10 | North America | United States | Enteritidis             | Enteritidis | 1425  | 18563 |
| SAL_DA1898AA | NY-swgs1509      | SRR1633518 | 2014 | 9  | North America | United States | Enteritidis             | Enteritidis | 1425  | 20109 |
| SAL_DA1899AA | NY-swgs1508      | SRR1633517 | 2014 | 9  | North America | United States | Enteritidis             | Enteritidis | 8003  | 12492 |
| SAL_DA1900AA | MDH-2014-00903   | SRR1633516 | 2014 | 8  | North America | United States | Enteritidis             | Enteritidis | 1425  | 20108 |
| SAL_DA1903AA | FCC0183          | SRR1633512 | 2010 | 10 | North America | United States | Enteritidis             | Enteritidis | 1425  | 20105 |
| SAL_DA1904AA | MDH-2014-00997   | SRR1633511 | 2014 | 10 | North America | United States | Enteritidis             | Enteritidis | 1425  | 18563 |
| SAL_DA1905AA | NY-swgs1506      | SRR1633506 | 2014 | 9  | North America | United States | Enteritidis             | Enteritidis | 1425  | 20104 |
| SAL_DA1907AA | MDH-2014-00982   | SRR1633504 | 2014 | 10 | North America | United States | Enteritidis             | Enteritidis | 1425  | 18563 |
| SAL_DA1908AA | MDH-2014-00979   | SRR1633503 | 2014 | 10 | North America | United States | Enteritidis             | Enteritidis | 1425  | 18563 |
| SAL_DA1909AA | MDH-2014-00985   | SRR1633501 | 2014 | 10 | North America | United States | Enteritidis             | Enteritidis | 1425  | 18563 |
| SAL_DA1913AA | MDH-2014-00988   | SRR1633497 | 2014 | 10 | North America | United States | Enteritidis             | Enteritidis | 1425  | 18563 |
| SAL_DA1915AA | MDH-2014-00978   | SRR1633495 | 2014 | 10 | North America | United States | Enteritidis             | Enteritidis | 1425  | 20099 |
| SAL_DA1916AA | NY-swgs1505      | SRR1633494 | 2014 | 9  | North America | United States | Enteritidis             | Enteritidis | 8003  | 12492 |
| SAL_DA1919AA | FCC0187          | SRR1633491 | 2010 | 10 | North America | United States | Enteritidis             | Enteritidis | 1425  | 20097 |
| SAL_DA1920AA | FCC0053          | SRR1633490 | 2010 | 6  | Asia          | China         | Enteritidis             | Enteritidis | 1425  | 20096 |
| SAL_DA1922AA | MDH-2014-00980   | SRR1633488 | 2014 | 10 | North America | United States | Enteritidis             | Enteritidis | 1425  | 18563 |
| SAL_DA1938AA | AZ-TG74480       | SRR1631184 | 2005 |    | North America | United States | Enteritidis             | Enteritidis | 26912 | 20079 |
| SAL_DA1939AA | AZ-TG74516       | SRR1631183 | 2005 |    | North America | United States | Johannesburg            | Enteritidis | 1425  | 20078 |
| SAL_DA1940AA | AZ-TG74448       | SRR1631182 | 2005 |    | North America | United States | Enteritidis             | Enteritidis | 1425  | 20077 |
| SAL_DA2040AA | 2014K-0528       | SRR1616823 | 2014 | 6  | North America | United States | Enteritidis             | Enteritidis | 1425  | 19991 |
| SAL_DA2041AA | 2014K-0527       | SRR1616822 | 2014 | 6  | North America | United States | Enteritidis             | Enteritidis | 1425  | 19991 |
| SAL_DA2042AA | 2014K-0526       | SRR1616821 | 2014 | 6  | North America | United States | Enteritidis             | Enteritidis | 1425  | 19991 |
| SAL_DA2043AA | 2014K-0525       | SRR1616820 |      |    | North America | United States | Enteritidis             | Enteritidis | 1425  | 19991 |
| SAL_DA2044AA | 2014K-0502       | SRR1616819 |      |    | North America | United States | Enteritidis             | Enteritidis | 27863 | 19990 |
| SAL_DA2045AA | 2014K-0501       | SRR1616818 |      |    | North America | United States | Enteritidis             | Enteritidis | 27863 | 19989 |
| SAL_DA2046AA | 2014K-0500       | SRR1616817 | 2014 | 5  | North America | United States | Enteritidis             | Enteritidis | 27863 | 19988 |
| SAL_DA2047AA | 2014K-0499       | SRR1616816 | 2014 | 3  | North America | United States | Enteritidis             | Enteritidis | 27863 | 19987 |
| SAL_DA2048AA | 2014K-0490       | SRR1616815 | 2014 | 3  | North America | United States | Enteritidis             | Enteritidis | 1425  | 19984 |
| SAL_DA2049AA | 2014K-0487       | SRR1616814 | 2014 | 5  | North America | United States | Enteritidis             | Enteritidis | 1425  | 19986 |
| SAL_DA2050AA | 2014K-0486       | SRR1616813 | 2014 | 4  | North America | United States | Enteritidis             | Enteritidis | 1425  | 19985 |
| SAL_DA2051AA | 2014K-0485       | SRR1616812 | 2014 | 4  | North America | United States | Enteritidis             | Enteritidis | 1425  | 19984 |
| SAL_DA2071AA | 2014K-0184       | SRR1616792 | 2014 | 1  | North America | United States | Enteritidis             | Enteritidis | 1425  | 19969 |
| SAL_DA2072AA | 2014K-0183       | SRR1616791 | 2014 | 1  | North America | United States | Enteritidis             | Enteritidis | 1425  | 19968 |
| SAL_DA2073AA | 2014K-0182       | SRR1616790 |      |    | North America | United States | Enteritidis (Predicted) | Enteritidis | 1425  | 19960 |
| SAL_DA2074AA | 2014K-0181       | SRR1616789 |      |    | North America | United States | Enteritidis (Predicted) | Enteritidis | 1425  | 19967 |
| SAL_DA2075AA | 2014K-0180       | SRR1616788 |      |    | North America | United States | Enteritidis (Predicted) | Enteritidis | 1425  | 19960 |
| SAL_DA2076AA | 2014K-0179       | SRR1616787 |      |    | North America | United States | Enteritidis (Predicted) | Enteritidis | 1425  | 14319 |
| SAL_DA2077AA | 2014K-0178       | SRR1616786 |      |    | North America | United States | Enteritidis (Predicted) | Enteritidis | 1425  | 19966 |
| SAL_DA2078AA | 2014K-0177       | SRR1616785 |      |    | North America | United States | Enteritidis (Predicted) | Enteritidis | 1425  | 19965 |
| SAL_DA2079AA | 2014K-0176       | SRR1616784 |      |    | North America | United States | Enteritidis (Predicted) | Enteritidis | 1425  | 19964 |
| SAL_DA2080AA | 2014K-0175       | SRR1616783 |      |    | North America | United States | Enteritidis (Predicted) | Enteritidis | 1425  | 14319 |
| SAL_DA2081AA | 2014K-0174       | SRR1616782 | 2014 | 1  | North America | United States | Enteritidis             | Enteritidis | 1425  | 19963 |
| SAL_DA2082AA | 2014K-0173       | SRR1616781 | 2014 | 1  | North America | United States | Enteritidis             | Enteritidis | 1425  | 19962 |
| SAL_DA2083AA | 2014K-0172       | SRR1616780 | 2014 | 1  | North America | United States | Enteritidis             | Enteritidis | 1425  | 14319 |
| SAL_DA2084AA | 2014K-0171       | SRR2586135 | 2013 | 12 | North America | United States | Enteritidis             | Enteritidis | 1425  | 14319 |
| SAL_DA2085AA | 2014K-0170       | SRR1616778 | 2013 | 12 | North America | United States | Enteritidis             | Enteritidis | 1425  | 14319 |
| SAL_DA2086AA | 2014K-0169       | SRR1616777 |      |    | North America | United States | Enteritidis (Predicted) | Enteritidis | 1425  | 19960 |
| SAL_DA2087AA | 2014K-0168       | SRR1616776 |      |    | North America | United States | Enteritidis (Predicted) | Enteritidis | 1425  | 19961 |
| SAL_DA2088AA | 2014K-0167       | SRR1616775 |      |    | North America | United States | Enteritidis (Predicted) | Enteritidis | 1425  | 19960 |
| SAL_DA2188AA | WAPHL_SAL-A00632 | SRR1615109 | 2014 | 8  | North America | United States | Enteritidis             | Enteritidis | 1425  | 19868 |

|              |                  |            |      |   |               |               |                         |             |       |       |
|--------------|------------------|------------|------|---|---------------|---------------|-------------------------|-------------|-------|-------|
| SAL_DA2193AA | WAPHL_SAL-A00640 | SRR1615104 | 2014 | 9 | North America | United States | Enteritidis             | Enteritidis | 1425  | 19863 |
| SAL_DA2194AA | WAPHL_SAL-A00633 | SRR1615103 | 2014 | 8 | North America | United States | Enteritidis             | Enteritidis | 1425  | 17155 |
| SAL_DA2197AA | WAPHL_SAL-A00638 | SRR1615100 | 2014 | 9 | North America | United States | Enteritidis             | Enteritidis | 1425  | 19860 |
| SAL_DA2207AA | WAPHL_SAL-A00630 | SRR1615089 | 2014 | 8 | North America | United States | Enteritidis             | Enteritidis | 1425  | 19852 |
| SAL_DA2209AA | WAPHL_SAL-A00637 | SRR1615087 | 2014 | 9 | North America | United States | Enteritidis             | Enteritidis | 1425  | 19851 |
| SAL_DA2210AA | WAPHL_SAL-A00636 | SRR1615086 | 2014 | 9 | North America | United States | Enteritidis             | Enteritidis | 1425  | 19850 |
| SAL_DA2212AA | WAPHL_SAL-A00639 | SRR1615084 | 2014 | 9 | North America | United States | Enteritidis             | Enteritidis | 1425  | 19848 |
| SAL_DA2213AA | WAPHL_SAL-A00631 | SRR3945751 | 2014 | 8 | North America | United States | Enteritidis             | Enteritidis | 1425  | 19847 |
| SAL_DA2221AA | WAPHL_SAL-A00634 | SRR1615075 | 2014 | 8 | North America | United States | Enteritidis             | Enteritidis | 1425  | 19839 |
| SAL_DA2224AA | WAPHL_SAL-A00635 | SRR1615000 | 2014 | 9 | North America | United States | Enteritidis             | Enteritidis | 1425  | 18379 |
| SAL_DA2225AA | NY-swgs1460      | SRR1614999 | 2014 | 8 | North America | United States | Enteritidis             | Enteritidis | 1425  | 19038 |
| SAL_DA2317AA | NY-swgs1499      | SRR1612367 | 2014 | 9 | North America | United States | Enteritidis             | Enteritidis | 1425  | 18599 |
| SAL_DA2319AA | NY-swgs1501      | SRR1612365 | 2014 | 9 | North America | United States | Enteritidis             | Enteritidis | 1425  | 19759 |
| SAL_DA2320AA | NY-swgs1500      | SRR1612364 | 2014 | 9 | North America | United States | Enteritidis             | Enteritidis | 8003  | 19758 |
| SAL_DA2339AA | MDH-2014-00976   | SRR1612334 | 2014 | 9 | North America | United States | Enteritidis             | Enteritidis | 1425  | 19741 |
| SAL_DA2340AA | NY-swgs1495      | SRR1612333 | 2014 | 8 | North America | United States | Enteritidis             | Enteritidis | 1425  | 2668  |
| SAL_DA2345AA | MDH-2014-00977   | SRR1612326 | 2014 | 9 | North America | United States | Enteritidis             | Enteritidis | 1425  | 19737 |
| SAL_DA2350AA | NY-swgs1498      | SRR1612316 | 2014 | 9 | North America | United States | Enteritidis             | Enteritidis | 1425  | 19732 |
| SAL_DA2357AA | NY-swgs1497      | SRR1612304 | 2014 | 9 | North America | United States | Enteritidis             | Enteritidis | 1425  | 19726 |
| SAL_DA2361AA | NY-swgs1496      | SRR1612292 | 2014 | 9 | North America | United States | Enteritidis             | Enteritidis | 1425  | 19722 |
| SAL_DA2381AA | AZ-TG74752       | SRR1609683 | 2005 |   | North America | United States | Enteritidis             | Enteritidis | 1425  | 19706 |
| SAL_DA2394AA | FDAARGOS_70      | SRR1608974 | 2013 | 7 | North America | United States | Group D                 | Enteritidis | 1425  | 19694 |
| SAL_DA2441AA | MDH-2014-00975   | SRR1598969 | 2014 | 9 | North America | United States | Enteritidis             | Enteritidis | 1425  | 18563 |
| SAL_DA2443AA | MDH-2014-00973   | SRR1598968 | 2014 | 9 | North America | United States | Enteritidis             | Enteritidis | 1425  | 19657 |
| SAL_DA2447AA | MDH-2014-00972   | SRR1598964 | 2014 | 9 | North America | United States | Enteritidis             | Enteritidis | 1425  | 18563 |
| SAL_DA2453AA | MDH-2014-00974   | SRR1598957 | 2014 | 9 | North America | United States | Enteritidis             | Enteritidis | 1425  | 19649 |
| SAL_DA2480AA | NY-swgs1478      | SRR1596415 | 2014 | 9 | North America | United States | Enteritidis             | Enteritidis | 1425  | 18599 |
| SAL_DA2490AA | NY-swgs1485      | SRR1596404 | 2014 | 9 | North America | United States | Enteritidis             | Enteritidis | 1425  | 19620 |
| SAL_DA2496AA | NY-swgs1481      | SRR1596397 | 2014 | 9 | North America | United States | Enteritidis             | Enteritidis | 1425  | 19182 |
| SAL_DA2497AA | NY-swgs1477      | SRR1596396 | 2014 | 8 | North America | United States | Enteritidis             | Enteritidis | 1425  | 19616 |
| SAL_DA2503AA | NY-swgs1484      | SRR1596390 | 2014 | 9 | North America | United States | Enteritidis             | Enteritidis | 1425  | 19612 |
| SAL_DA2504AA | NY-swgs1479      | SRR1596389 | 2014 | 8 | North America | United States | Enteritidis             | Enteritidis | 1425  | 19611 |
| SAL_DA2506AA | FDN0159          | SRR1596387 | 2013 | 5 | North America | United States | Enteritidis (Predicted) | Enteritidis | 1425  | 19609 |
| SAL_DA2509AA | NY-swgs1482      | SRR1596384 | 2014 | 9 | North America | United States | Enteritidis             | Enteritidis | 1425  | 19607 |
| SAL_DA2510AA | NY-swgs1480      | SRR1596383 | 2014 | 9 | North America | United States | Enteritidis             | Enteritidis | 1425  | 19606 |
| SAL_DA2518AA | NY-swgs1483      | SRR1596374 | 2014 | 9 | North America | United States | Enteritidis             | Enteritidis | 1425  | 19600 |
| SAL_DA2553AA | FDA00003855      | SRR1593413 | 2011 | 3 | Asia          | Bangladesh    | Enteritidis             | Enteritidis | 1425  | 19559 |
| SAL_DA2561AA | MDH-2014-00971   | SRR1593405 | 2014 | 9 | North America | United States | Enteritidis             | Enteritidis | 1425  | 19569 |
| SAL_DA2562AA | MDH-2014-00970   | SRR1593404 | 2014 | 9 | North America | United States | Enteritidis             | Enteritidis | 1425  | 19568 |
| SAL_DA2574AA | FDA00003854      | SRR1593392 | 2011 | 3 | Asia          | Bangladesh    | Enteritidis             | Enteritidis | 1425  | 19559 |
| SAL_DA2628AA | NY-swgs1472      | SRR1588691 | 2014 | 9 | North America | United States | Enteritidis             | Enteritidis | 1425  | 19517 |
| SAL_DA2630AA | NY-swgs1473      | SRR1588689 | 2014 | 9 | North America | United States | Enteritidis             | Enteritidis | 8003  | 12492 |
| SAL_DA2635AA | NY-swgs1476      | SRR1588684 | 2014 | 8 | North America | United States | Enteritidis             | Enteritidis | 1425  | 19512 |
| SAL_DA2636AA | NY-swgs1474      | SRR1588683 | 2014 | 9 | North America | United States | Enteritidis             | Enteritidis | 1425  | 18599 |
| SAL_DA2637AA | NY-swgs1468      | SRR1588682 | 2014 | 8 | North America | United States | Enteritidis             | Enteritidis | 1425  | 17266 |
| SAL_DA2642AA | NY-swgs1475      | SRR1588677 | 2014 | 9 | North America | United States | Enteritidis             | Enteritidis | 1425  | 19507 |
| SAL_DA2649AA | NY-swgs1471      | SRR1588670 | 2014 | 9 | North America | United States | Enteritidis             | Enteritidis | 1425  | 19182 |
| SAL_DA2650AA | NY-swgs1470      | SRR1588669 | 2014 | 8 | North America | United States | Enteritidis             | Enteritidis | 1425  | 18599 |
| SAL_DA2651AA | NY-swgs1469      | SRR1588668 | 2014 | 8 | North America | United States | Enteritidis             | Enteritidis | 1425  | 17266 |
| SAL_DA2652AA | NY-swgs1467      | SRR1588667 | 2014 | 8 | North America | United States | Enteritidis             | Enteritidis | 1425  | 18599 |
| SAL_DA2659AA | FDA00004351      | SRR1586612 | 2014 | 4 | Europe        | Lithuania     | Enteritidis (Predicted) | Enteritidis | 1425  | 19497 |
| SAL_DA2691AA | MDH-2014-00969   | SRR1586580 | 2014 | 9 | North America | United States | Enteritidis             | Enteritidis | 8003  | 19480 |
| SAL_DA2720AA | MDH-2014-00968   | SRR1586550 | 2014 | 9 | North America | United States | Enteritidis             | Enteritidis | 1425  | 18290 |
| SAL_DA2854AA | NY-swgs1452      | SRR1582196 | 2014 | 8 | North America | United States | Enteritidis             | Enteritidis | 27796 | 19374 |
| SAL_DA2855AA | NY-swgs1397      | SRR1582195 | 2014 | 7 | North America | United States | Enteritidis             | Enteritidis | 1425  | 19373 |
| SAL_DA2857AA | NY-swgs1462      | SRR1582193 | 2014 | 8 | North America | United States | Enteritidis             | Enteritidis | 1425  | 18599 |
| SAL_DA2860AA | NY-swgs1456      | SRR1582189 | 2014 | 8 | North America | United States | Enteritidis             | Enteritidis | 1425  | 19369 |
| SAL_DA2863AA | NY-swgs1398      | SRR1582186 | 2014 | 7 | North America | United States | Enteritidis             | Enteritidis | 1425  | 19367 |
| SAL_DA2864AA | NY-swgs1392      | SRR1582185 | 2014 | 7 | North America | United States | Enteritidis             | Enteritidis | 1425  | 19366 |

|              |                  |            |      |    |               |               |                         |             |       |       |
|--------------|------------------|------------|------|----|---------------|---------------|-------------------------|-------------|-------|-------|
| SAL_DA2868AA | NY-swgs1453      | SRR1582181 | 2014 | 8  | North America | United States | Enteritidis             | Enteritidis | 1425  | 18599 |
| SAL_DA2870AA | NY-swgs1454      | SRR1582179 | 2014 | 8  | North America | United States | Enteritidis             | Enteritidis | 1425  | 19361 |
| SAL_DA2871AA | NY-swgs1393      | SRR1582178 | 2014 | 7  | North America | United States | Enteritidis             | Enteritidis | 1425  | 19360 |
| SAL_DA2874AA | NY-swgs1394      | SRR1582175 | 2014 | 7  | North America | United States | Enteritidis             | Enteritidis | 1425  | 19358 |
| SAL_DA2876AA | NY-swgs1390      | SRR1582172 | 2014 | 7  | North America | United States | Enteritidis             | Enteritidis | 1425  | 19356 |
| SAL_DA2877AA | NY-swgs1389      | SRR1582171 | 2014 | 7  | North America | United States | Enteritidis             | Enteritidis | 1425  | 19018 |
| SAL_DA2881AA | NY-swgs1455      | SRR1582151 | 2014 | 8  | North America | United States | Enteritidis             | Enteritidis | 1425  | 18599 |
| SAL_DA2882AA | NY-swgs1395      | SRR1582150 | 2014 | 7  | North America | United States | Enteritidis             | Enteritidis | 1425  | 19353 |
| SAL_DA2887AA | NY-swgs1463      | SRR1582144 | 2014 | 8  | North America | United States | Enteritidis             | Enteritidis | 1425  | 18380 |
| SAL_DA2903AA | NY-swgs1461      | SRR1581508 | 2014 | 8  | North America | United States | Enteritidis             | Enteritidis | 1425  | 19339 |
| SAL_DA2904AA | NY-swgs1396      | SRR1581507 | 2014 | 7  | North America | United States | Enteritidis             | Enteritidis | 1425  | 19338 |
| SAL_DA2913AA | NY-swgs1391      | SRR1581498 | 2014 | 7  | North America | United States | Enteritidis             | Enteritidis | 1425  | 7686  |
| SAL_DA2986AA | WAPHL_SAL-A00620 | SRR1576611 | 2014 | 7  | North America | United States | Enteritidis             | Enteritidis | 1425  | 19284 |
| SAL_DA2988AA | WAPHL_SAL-A00616 | SRR1576609 | 2014 | 5  | North America | United States | Enteritidis             | Enteritidis | 1425  | 19281 |
| SAL_DA3016AA | MDH-2014-00414   | SRR1576563 | 2003 | 3  | North America | United States | Enteritidis             | Enteritidis | 26543 | 19263 |
| SAL_DA3017AA | MDH-2014-00413   | SRR1576562 | 2003 | 3  | North America | United States | Enteritidis             | Enteritidis | 26543 | 19262 |
| SAL_DA3035AA | WAPHL_SAL-A00624 | SRR1576244 | 2014 | 7  | North America | United States | Enteritidis             | Enteritidis | 1425  | 19248 |
| SAL_DA3067AA | WAPHL_SAL-A00615 | SRR1576209 | 2014 | 5  | North America | United States | Enteritidis             | Enteritidis | 1425  | 19187 |
| SAL_DA3121AA | WAPHL_SAL-A00614 | SRR1576101 | 2014 | 5  | North America | United States | Enteritidis             | Enteritidis | 1425  | 19187 |
| SAL_DA3126AA | WAPHL_SAL-A00613 | SRR1576095 | 2014 | 5  | North America | United States | Enteritidis             | Enteritidis | 1425  | 19187 |
| SAL_DA3133AA | WAPHL_SAL-A00622 | SRR1576023 | 2014 | 7  | North America | United States | Enteritidis             | Enteritidis | 1425  | 19182 |
| SAL_DA3135AA | WAPHL_SAL-A00628 | SRR1576021 | 2014 | 7  | North America | United States | Enteritidis             | Enteritidis | 1425  | 19180 |
| SAL_DA3140AA | WAPHL_SAL-A00626 | SRR1576016 | 2014 | 7  | North America | United States | Enteritidis             | Enteritidis | 1425  | 19175 |
| SAL_DA3141AA | WAPHL_SAL-A00625 | SRR1576015 | 2014 | 7  | North America | United States | Enteritidis             | Enteritidis | 1425  | 19174 |
| SAL_DA3144AA | WAPHL_SAL-A00621 | SRR1576011 | 2014 | 7  | North America | United States | Enteritidis             | Enteritidis | 1425  | 19171 |
| SAL_DA3145AA | WAPHL_SAL-A00618 | SRR1576010 | 2014 | 7  | North America | United States | Enteritidis             | Enteritidis | 1425  | 19170 |
| SAL_DA3150AA | CFSAN023296      | SRR1576005 | 2001 | 5  | North America | United States | Enteritidis             | Enteritidis | 1425  | 14275 |
| SAL_DA3151AA | CFSAN023294      | SRR1576004 | 2001 | 5  | North America | United States | Enteritidis             | Enteritidis | 1425  | 14275 |
| SAL_DA3160AA | CFSAN023290      | SRR1575991 | 2001 | 5  | North America | United States | Enteritidis             | Enteritidis | 1425  | 19159 |
| SAL_DA3161AA | WAPHL_SAL-A00623 | SRR1575989 | 2014 | 7  | North America | United States | Enteritidis             | Enteritidis | 1425  | 19158 |
| SAL_DA3180AA | FDA00003513      | SRR1575959 | 2011 | 10 | North America | United States | Enteritidis             | Enteritidis | 1425  | 19143 |
| SAL_DA3184AA | CFSAN023300      | SRR1575955 | 2001 | 7  | North America | United States | Enteritidis             | Enteritidis | 1425  | 14261 |
| SAL_DA3196AA | WAPHL_SAL-A00627 | SRR1575942 | 2014 | 8  | North America | United States | Enteritidis             | Enteritidis | 1425  | 19134 |
| SAL_DA3197AA | CFSAN023677      | SRR1575941 | 2006 | 4  | North America | United States | Enteritidis (Predicted) | Enteritidis | 26543 | 19133 |
| SAL_DA3200AA | WAPHL_SAL-A00619 | SRR1575911 | 2014 | 7  | North America | United States | Enteritidis             | Enteritidis | 1425  | 15185 |
| SAL_DA3205AA | CFSAN023311      | SRR1575906 | 2003 | 11 | North America | United States | Enteritidis             | Enteritidis | 1425  | 19128 |
| SAL_DA3208AA | MDH-2014-00944   | SRR1574317 | 2014 | 8  | North America | United States | Enteritidis             | Enteritidis | 1425  | 19125 |
| SAL_DA3222AA | MDH-2014-00496   | SRR1574303 | 2003 | 5  | North America | United States | Enteritidis             | Enteritidis | 27433 | 19113 |
| SAL_DA3227AA | NY-swgs1449      | SRR1574298 | 2014 | 8  | North America | United States | Enteritidis             | Enteritidis | 7801  | 19108 |
| SAL_DA3228AA | NY-swgs1448      | SRR1574297 | 2014 | 8  | North America | United States | Enteritidis             | Enteritidis | 1425  | 19107 |
| SAL_DA3235AA | MDH-2014-00965   | SRR1574287 | 2014 | 8  | North America | United States | Enteritidis             | Enteritidis | 1425  | 19101 |
| SAL_DA3236AA | MDH-2014-00945   | SRR1574286 | 2014 | 8  | North America | United States | Enteritidis             | Enteritidis | 1425  | 19100 |
| SAL_DA3237AA | NY-swgs1445      | SRR1574285 | 2014 | 8  | North America | United States | Enteritidis             | Enteritidis | 1425  | 19099 |
| SAL_DA3246AA | NY-swgs1447      | SRR1574276 | 2014 | 8  | North America | United States | Enteritidis             | Enteritidis | 1425  | 17155 |
| SAL_DA3247AA | NY-swgs1446      | SRR1574275 | 2014 | 8  | North America | United States | Enteritidis             | Enteritidis | 1425  | 16241 |
| SAL_DA3248AA | NY-swgs1450      | SRR1574267 | 2014 | 8  | North America | United States | Enteritidis             | Enteritidis | 1425  | 19038 |
| SAL_DA3255AA | MDH-2014-00943   | SRR1574258 | 2014 | 8  | North America | United States | Enteritidis             | Enteritidis | 1425  | 18563 |
| SAL_DA3262AA | MDH-2014-00946   | SRR1574250 | 2014 | 8  | North America | United States | Enteritidis             | Enteritidis | 1425  | 19081 |
| SAL_DA3263AA | NY-swgs1451      | SRR1574249 | 2014 | 8  | North America | United States | Enteritidis             | Enteritidis | 1425  | 19043 |
| SAL_DA3264AA | NY-swgs1444      | SRR1574248 | 2014 | 8  | North America | United States | Enteritidis             | Enteritidis | 1425  | 18599 |
| SAL_DA3289AA | WAPHL_SAL-A00540 | SRR1573562 | 2004 | 8  | North America | United States | Enteritidis             | Enteritidis | 1425  | 19061 |
| SAL_DA3291AA | NY-swgs1431      | SRR1573189 | 2014 | 8  | North America | United States | Enteritidis             | Enteritidis | 1425  | 19059 |
| SAL_DA3292AA | NY-swgs1428      | SRR1573188 | 2014 | 8  | North America | United States | Enteritidis             | Enteritidis | 8003  | 12492 |
| SAL_DA3295AA | NY-swgs1429      | SRR1573185 | 2014 | 8  | North America | United States | Enteritidis             | Enteritidis | 1425  | 19057 |
| SAL_DA3296AA | NY-swgs1426      | SRR1573184 | 2014 | 8  | North America | United States | Enteritidis             | Enteritidis | 1425  | 19056 |
| SAL_DA3300AA | NY-swgs1417      | SRR1573180 | 2014 | 8  | North America | United States | Enteritidis             | Enteritidis | 1425  | 19022 |
| SAL_DA3301AA | NY-swgs1433      | SRR1573179 | 2014 | 8  | North America | United States | Enteritidis             | Enteritidis | 1425  | 19053 |
| SAL_DA3302AA | NY-swgs1421      | SRR1573178 | 2014 | 8  | North America | United States | Enteritidis             | Enteritidis | 1425  | 19052 |
| SAL_DA3303AA | NY-swgs1420      | SRR1573177 | 2014 | 8  | North America | United States | Enteritidis             | Enteritidis | 1425  | 19051 |

|              |                |            |      |    |               |               |                         |             |       |       |
|--------------|----------------|------------|------|----|---------------|---------------|-------------------------|-------------|-------|-------|
| SAL_DA3305AA | CFSAN023306    | SRR1573175 | 2003 | 11 | North America | United States | Enteritidis             | Enteritidis | 1425  | 19049 |
| SAL_DA3309AA | CFSAN023287    | SRR1573171 | 2000 | 9  | North America | United States | Enteritidis             | Enteritidis | 1425  | 14269 |
| SAL_DA3310AA | NY-swgs1427    | SRR1573137 | 2014 | 8  | North America | United States | Enteritidis             | Enteritidis | 1425  | 19045 |
| SAL_DA3312AA | CFSAN023301    | SRR1573135 | 2001 | 7  | North America | United States | Enteritidis             | Enteritidis | 1425  | 14261 |
| SAL_DA3313AA | CFSAN023299    | SRR1573134 | 2001 | 6  | North America | United States | Enteritidis             | Enteritidis | 1425  | 19044 |
| SAL_DA3314AA | NY-swgs1424    | SRR1573132 | 2014 | 8  | North America | United States | Enteritidis             | Enteritidis | 1425  | 19037 |
| SAL_DA3315AA | CFSAN023616    | SRR1573131 | 2007 | 2  | North America | United States | Enteritidis (Predicted) | Enteritidis | 1425  | 13508 |
| SAL_DA3317AA | NY-swgs1419    | SRR1573129 | 2014 | 8  | North America | United States | Enteritidis             | Enteritidis | 1425  | 19043 |
| SAL_DA3318AA | NY-swgs1418    | SRR1573128 | 2014 | 8  | North America | United States | Enteritidis             | Enteritidis | 1425  | 19042 |
| SAL_DA3321AA | CFSAN023317    | SRR1573125 | 2011 | 10 | North America | United States | Enteritidis             | Enteritidis | 1425  | 19040 |
| SAL_DA3322AA | NY-swgs1432    | SRR1573124 | 2014 | 8  | North America | United States | Enteritidis             | Enteritidis | 1425  | 19039 |
| SAL_DA3323AA | NY-swgs1430    | SRR1573123 | 2014 | 8  | North America | United States | Enteritidis             | Enteritidis | 1425  | 19038 |
| SAL_DA3324AA | NY-swgs1425    | SRR1573122 | 2014 | 8  | North America | United States | Enteritidis             | Enteritidis | 1425  | 19037 |
| SAL_DA3327AA | CFSAN023314    | SRR1573119 | 2003 | 11 | North America | United States | Enteritidis             | Enteritidis | 1425  | 19036 |
| SAL_DA3337AA | NY-swgs1423    | SRR1573097 | 2014 | 8  | North America | United States | Enteritidis             | Enteritidis | 1425  | 19029 |
| SAL_DA3340AA | CFSAN023304    | SRR1573094 | 2000 | 8  | North America | United States | Enteritidis             | Enteritidis | 1425  | 19027 |
| SAL_DA3341AA | NY-swgs1422    | SRR1573093 | 2014 | 8  | North America | United States | Enteritidis             | Enteritidis | 1425  | 19026 |
| SAL_DA3345AA | NY-swgs1387    | SRR1571600 | 2014 | 7  | North America | United States | Enteritidis             | Enteritidis | 8003  | 19024 |
| SAL_DA3346AA | NY-swgs1381    | SRR1571599 | 2014 | 7  | North America | United States | Enteritidis             | Enteritidis | 1425  | 19023 |
| SAL_DA3347AA | NY-swgs1386    | SRR1571598 | 2014 | 7  | North America | United States | Enteritidis             | Enteritidis | 1425  | 19022 |
| SAL_DA3348AA | NY-swgs1380    | SRR1571597 | 2014 | 7  | North America | United States | Enteritidis             | Enteritidis | 1425  | 19021 |
| SAL_DA3349AA | NY-swgs1388    | SRR1571594 | 2014 | 7  | North America | United States | Enteritidis             | Enteritidis | 1425  | 19020 |
| SAL_DA3350AA | NY-swgs1385    | SRR1571590 | 2014 | 7  | North America | United States | Enteritidis             | Enteritidis | 1425  | 19019 |
| SAL_DA3351AA | NY-swgs1384    | SRR1571586 | 2014 | 7  | North America | United States | Enteritidis             | Enteritidis | 1425  | 19018 |
| SAL_DA3352AA | NY-swgs1383    | SRR1571582 | 2014 | 7  | North America | United States | Enteritidis             | Enteritidis | 1425  | 19017 |
| SAL_DA3353AA | NY-swgs1382    | SRR1571579 | 2014 | 7  | North America | United States | Enteritidis             | Enteritidis | 1425  | 19017 |
| SAL_DA3425AA | MDH-2014-00940 | SRR1569753 | 2014 | 8  | North America | United States | Enteritidis             | Enteritidis | 1425  | 18950 |
| SAL_DA3430AA | CFSAN023319    | SRR1569748 | 2011 | 9  | North America | United States | Enteritidis             | Enteritidis | 28313 | 18946 |
| SAL_DA3442AA | CFSAN023285    | SRR1569730 | 2000 | 9  | North America | United States | Enteritidis             | Enteritidis | 1425  | 14269 |
| SAL_DA3448AA | MDH-2014-00941 | SRR1569723 | 2014 | 8  | North America | United States | Enteritidis             | Enteritidis | 1425  | 18563 |
| SAL_DA3452AA | CFSAN023310    | SRR1569719 | 2003 | 11 | North America | United States | Enteritidis             | Enteritidis | 1425  | 14267 |
| SAL_DA3453AA | CFSAN023308    | SRR1569718 | 2003 | 11 | North America | United States | Enteritidis             | Enteritidis | 1425  | 14267 |
| SAL_DA3458AA | CFSAN023291    | SRR1569712 | 2001 | 5  | North America | United States | Enteritidis             | Enteritidis | 1425  | 18926 |
| SAL_DA3459AA | CFSAN023289    | SRR1569711 | 2000 | 10 | North America | United States | Enteritidis             | Enteritidis | 1425  | 18925 |
| SAL_DA3477AA | MDH-2014-00942 | SRR1569690 | 2014 | 8  | North America | United States | Enteritidis             | Enteritidis | 1425  | 18912 |
| SAL_DA3479AA | CFSAN023284    | SRR1569688 | 2000 | 9  | North America | United States | Enteritidis             | Enteritidis | 1425  | 14269 |
| SAL_DA3484AA | CFSAN023292    | SRR1569683 | 2001 | 5  | North America | United States | Enteritidis             | Enteritidis | 1425  | 14275 |
| SAL_DA3487AA | CFSAN023295    | SRR1569679 | 2001 | 5  | North America | United States | Enteritidis             | Enteritidis | 1425  | 14275 |
| SAL_DA3495AA | CFSAN023288    | SRR1569670 | 2000 | 10 | North America | United States | Enteritidis             | Enteritidis | 1425  | 14269 |
| SAL_DA3502AA | CFSAN023307    | SRR1569663 | 2003 | 11 | North America | United States | Enteritidis             | Enteritidis | 1425  | 14267 |
| SAL_DA3503AA | CFSAN023297    | SRR1569662 | 2001 | 5  | North America | United States | Enteritidis             | Enteritidis | 1425  | 14275 |
| SAL_DA3504AA | CFSAN023283    | SRR1569661 | 2000 | 9  | North America | United States | Enteritidis             | Enteritidis | 1425  | 18898 |
| SAL_DA3509AA | CFSAN023303    | SRR1569655 | 2001 | 7  | North America | United States | Enteritidis             | Enteritidis | 1425  | 18895 |
| SAL_DA3510AA | CFSAN023286    | SRR1569654 | 2000 | 9  | North America | United States | Enteritidis             | Enteritidis | 1425  | 14269 |
| SAL_DA3513AA | CFSAN023293    | SRR1569650 | 2001 | 5  | North America | United States | Enteritidis             | Enteritidis | 1425  | 18893 |
| SAL_DA3518AA | CFSAN023298    | SRR1569645 | 2001 | 4  | North America | United States | Enteritidis             | Enteritidis | 1425  | 18889 |
| SAL_DA3527AA | CFSAN023309    | SRR1569635 | 2003 | 11 | North America | United States | Enteritidis             | Enteritidis | 1425  | 18883 |
| SAL_DA3533AA | CFSAN023318    | SRR1569623 | 2011 | 9  | North America | United States | Enteritidis             | Enteritidis | 1425  | 18878 |
| SAL_DA3534AA | MDH-2014-00939 | SRR1569622 | 2014 | 8  | North America | United States | Enteritidis             | Enteritidis | 1425  | 18877 |
| SAL_DA3537AA | CFSAN023313    | SRR1569619 | 2003 | 8  | North America | United States | Enteritidis             | Enteritidis | 1425  | 18875 |
| SAL_DA3543AA | CFSAN023302    | SRR1569607 | 2001 | 7  | North America | United States | Enteritidis             | Enteritidis | 1425  | 18869 |
| SAL_DA3546AA | CFSAN023305    | SRR1569604 | 2000 | 11 | North America | United States | Enteritidis             | Enteritidis | 1425  | 14304 |
| SAL_DA3551AA | CFSAN023315    | SRR1569599 | 2011 | 9  | North America | United States | Enteritidis             | Enteritidis | 1425  | 18864 |
| SAL_DA3559AA | CFSAN023312    | SRR1569590 | 2003 | 12 | North America | United States | Enteritidis             | Enteritidis | 1425  | 14267 |
| SAL_DA3562AA | CFSAN023316    | SRR1569587 | 2011 | 10 | North America | United States | Enteritidis             | Enteritidis | 1425  | 14281 |
| SAL_DA3566AA | CFSAN023236    | SRR1567879 | 2006 | 11 | North America | United States | Enteritidis (Predicted) | Enteritidis | 1425  | 18852 |
| SAL_DA3567AA | CFSAN023235    | SRR1567878 | 2006 | 11 | North America | United States | Enteritidis (Predicted) | Enteritidis | 1425  | 18851 |
| SAL_DA3569AA | CFSAN023237    | SRR1567875 | 2006 | 11 | North America | United States | Enteritidis (Predicted) | Enteritidis | 1425  | 18849 |
| SAL_DA3574AA | CFSAN023239    | SRR1567847 | 2006 | 11 | North America | United States | Enteritidis (Predicted) | Enteritidis | 1425  | 18845 |

|              |                  |            |      |    |               |               |                         |             |       |       |
|--------------|------------------|------------|------|----|---------------|---------------|-------------------------|-------------|-------|-------|
| SAL_DA3779AA | NY-swgs1416      | SRR1566240 | 2014 | 8  | North America | United States | Enteritidis             | Enteritidis | 1425  | 18705 |
| SAL_DA3780AA | NY-swgs1415      | SRR1566238 | 2014 | 8  | North America | United States | Enteritidis             | Enteritidis | 1425  | 18704 |
| SAL_DA3781AA | NY-swgs1414      | SRR1566237 | 2014 | 8  | North America | United States | Enteritidis             | Enteritidis | 8003  | 18703 |
| SAL_DA3782AA | NY-swgs1413      | SRR1566234 | 2014 | 8  | North America | United States | Enteritidis             | Enteritidis | 1425  | 18702 |
| SAL_DA3783AA | NY-swgs1412      | SRR1566233 | 2014 | 8  | North America | United States | Enteritidis             | Enteritidis | 1425  | 18694 |
| SAL_DA3791AA | CFSAN023258      | SRR1566223 | 2006 | 11 | North America | United States | Enteritidis (Predicted) | Enteritidis | 26543 | 18687 |
| SAL_DA3792AA | CFSAN023257      | SRR1566222 | 2006 | 11 | North America | United States | Enteritidis (Predicted) | Enteritidis | 26543 | 18686 |
| SAL_DA3793AA | CFSAN023256      | SRR1566221 | 2006 | 11 | North America | United States | Enteritidis (Predicted) | Enteritidis | 26543 | 18685 |
| SAL_DA3794AA | CFSAN023255      | SRR1566220 | 2006 | 11 | North America | United States | Enteritidis (Predicted) | Enteritidis | 26543 | 18684 |
| SAL_DA3795AA | CFSAN023254      | SRR1566219 | 2006 | 11 | North America | United States | Enteritidis (Predicted) | Enteritidis | 26543 | 18683 |
| SAL_DA3796AA | CFSAN023253      | SRR1566218 | 2006 | 11 | North America | United States | Enteritidis (Predicted) | Enteritidis | 1425  | 18682 |
| SAL_DA3797AA | CFSAN023252      | SRR1566217 | 2006 | 11 | North America | United States | Enteritidis (Predicted) | Enteritidis | 1425  | 18681 |
| SAL_DA3798AA | CFSAN023251      | SRR1566216 | 2006 | 11 | North America | United States | Enteritidis (Predicted) | Enteritidis | 1425  | 18680 |
| SAL_DA3799AA | CFSAN023250      | SRR1566215 | 2006 | 11 | North America | United States | Enteritidis (Predicted) | Enteritidis | 28296 | 18679 |
| SAL_DA3800AA | CFSAN023249      | SRR1566214 | 2006 | 11 | North America | United States | Enteritidis (Predicted) | Enteritidis | 26543 | 18678 |
| SAL_DA3801AA | CFSAN023248      | SRR1566213 | 2006 | 11 | North America | United States | Enteritidis (Predicted) | Enteritidis | 1425  | 18677 |
| SAL_DA3802AA | CFSAN023247      | SRR1566212 | 2006 | 11 | North America | United States | Enteritidis (Predicted) | Enteritidis | 1425  | 18676 |
| SAL_DA3803AA | CFSAN023246      | SRR1566211 | 2006 | 11 | North America | United States | Enteritidis (Predicted) | Enteritidis | 1425  | 18675 |
| SAL_DA3804AA | CFSAN023245      | SRR1566210 | 2006 | 11 | North America | United States | Enteritidis (Predicted) | Enteritidis | 28295 | 18674 |
| SAL_DA3805AA | CFSAN023244      | SRR1566209 | 2006 | 11 | North America | United States | Enteritidis (Predicted) | Enteritidis | 28295 | 18673 |
| SAL_DA3806AA | CFSAN023243      | SRR1566208 | 2006 | 11 | North America | United States | Enteritidis (Predicted) | Enteritidis | 26543 | 18672 |
| SAL_DA3807AA | CFSAN023242      | SRR1566207 | 2006 | 11 | North America | United States | Enteritidis (Predicted) | Enteritidis | 26543 | 18671 |
| SAL_DA3808AA | CFSAN023241      | SRR1566206 | 2006 | 11 | North America | United States | Enteritidis (Predicted) | Enteritidis | 1425  | 18670 |
| SAL_DA3814AA | CFSAN023238      | SRR1564497 | 2006 | 11 | North America | United States | Enteritidis (Predicted) | Enteritidis | 1425  | 18667 |
| SAL_DA3820AA | MDH-2014-00937   | SRR1562664 | 2014 | 8  | North America | United States | Enteritidis             | Enteritidis | 27436 | 18662 |
| SAL_DA3822AA | FDA00004276      | SRR1562662 | 2014 | 1  | Asia          | Bangladesh    | Enteritidis             | Enteritidis | 1425  | 18660 |
| SAL_DA3827AA | MDH-2014-00934   | SRR1562657 | 2014 | 8  | North America | United States | Enteritidis             | Enteritidis | 1425  | 18655 |
| SAL_DA3833AA | MDH-2014-00938   | SRR1562651 | 2014 | 8  | North America | United States | Enteritidis             | Enteritidis | 1425  | 18563 |
| SAL_DA3834AA | NY-swgs1407      | SRR1562650 | 2014 | 8  | North America | United States | Enteritidis             | Enteritidis | 1425  | 18651 |
| SAL_DA3835AA | NY-swgs1404      | SRR1562649 | 2014 | 7  | North America | United States | Enteritidis             | Enteritidis | 3888  | 18650 |
| SAL_DA3840AA | NY-swgs1411      | SRR1562644 | 2014 | 8  | North America | United States | Enteritidis             | Enteritidis | 1425  | 18646 |
| SAL_DA3841AA | NY-swgs1410      | SRR1562643 | 2014 | 8  | North America | United States | Enteritidis             | Enteritidis | 1425  | 18645 |
| SAL_DA3842AA | NY-swgs1401      | SRR1562642 | 2014 | 7  | North America | United States | Enteritidis             | Enteritidis | 1425  | 18644 |
| SAL_DA3847AA | NY-swgs1402      | SRR1562636 | 2014 | 7  | North America | United States | Enteritidis             | Enteritidis | 1425  | 18640 |
| SAL_DA3848AA | NY-swgs1399      | SRR1562635 | 2014 | 8  | North America | United States | Enteritidis             | Enteritidis | 1425  | 18639 |
| SAL_DA3858AA | NY-swgs1409      | SRR1562625 | 2014 | 8  | North America | United States | Enteritidis             | Enteritidis | 1425  | 18630 |
| SAL_DA3866AA | MDH-2014-00935   | SRR1562612 | 2014 | 8  | North America | United States | Enteritidis             | Enteritidis | 1425  | 17514 |
| SAL_DA3867AA | NY-swgs1406      | SRR1562611 | 2014 | 8  | North America | United States | Enteritidis             | Enteritidis | 8003  | 18623 |
| SAL_DA3872AA | NY-swgs1400      | SRR1562604 | 2014 | 7  | North America | United States | Enteritidis             | Enteritidis | 1425  | 18618 |
| SAL_DA3879AA | NY-swgs1403      | SRR1562597 | 2014 | 8  | North America | United States | Enteritidis             | Enteritidis | 1425  | 18611 |
| SAL_DA3893AA | MDH-2014-00936   | SRR1562583 | 2014 | 8  | North America | United States | Enteritidis             | Enteritidis | 1425  | 18600 |
| SAL_DA3894AA | NY-swgs1408      | SRR1562582 | 2014 | 8  | North America | United States | Enteritidis             | Enteritidis | 1425  | 18599 |
| SAL_DA3899AA | NY-swgs1405      | SRR1562568 | 2014 | 7  | North America | United States | Enteritidis             | Enteritidis | 1425  | 18594 |
| SAL_DA3906AA | MDH-2014-00930   | SRR1561716 | 2014 | 8  | North America | United States | Enteritidis             | Enteritidis | 1425  | 18563 |
| SAL_DA3933AA | MDH-2014-00933   | SRR1561689 | 2014 | 8  | North America | United States | Enteritidis             | Enteritidis | 1425  | 18563 |
| SAL_DA3934AA | MDH-2014-00932   | SRR1561688 | 2014 | 8  | North America | United States | Enteritidis             | Enteritidis | 1425  | 18561 |
| SAL_DA3935AA | MDH-2014-00931   | SRR1561687 | 2014 | 8  | North America | United States | Enteritidis             | Enteritidis | 1425  | 18562 |
| SAL_DA3936AA | MDH-2014-00929   | SRR1561686 | 2014 | 8  | North America | United States | Enteritidis             | Enteritidis | 1425  | 18561 |
| SAL_DA4007AA | MDH-2014-00910   | SRR1557008 | 2014 | 8  | North America | United States | Enteritidis             | Enteritidis | 1425  | 18498 |
| SAL_DA4012AA | MDH-2014-00908   | SRR1557001 | 2014 | 8  | North America | United States | Enteritidis             | Enteritidis | 1425  | 18493 |
| SAL_DA4024AA | MDH-2014-00912   | SRR1556985 | 2014 | 8  | North America | United States | Enteritidis             | Enteritidis | 1425  | 18369 |
| SAL_DA4035AA | MDH-2014-00909   | SRR1556970 | 2014 | 8  | North America | United States | Enteritidis             | Enteritidis | 1425  | 18478 |
| SAL_DA4047AA | MDH-2014-00911   | SRR1556957 | 2014 | 8  | North America | United States | Enteritidis             | Enteritidis | 1425  | 18469 |
| SAL_DA4090AA | WAPHL_SAL-A00505 | SRR1556074 | 2004 |    | North America | United States | Enteritidis             | Enteritidis | 1425  | 18432 |
| SAL_DA4142AA | NY-swgs1373      | SRR1553898 | 2014 | 7  | North America | United States | Enteritidis             | Enteritidis | 1425  | 18389 |
| SAL_DA4145AA | FCC0179          | SRR1553895 | 2010 | 9  | North America | United States | Enteritidis             | Enteritidis | 1425  | 18387 |
| SAL_DA4147AA | NY-swgs1308      | SRR1544416 | 2014 | 5  | North America | United States | Enteritidis             | Enteritidis | 1425  | 18385 |
| SAL_DA4151AA | FCC0181          | SRR1553883 | 2010 | 9  | North America | United States | Enteritidis             | Enteritidis | 1425  | 41056 |
| SAL_DA4153AA | NY-swgs1379      | SRR1553878 | 2014 | 7  | North America | United States | Enteritidis             | Enteritidis | 1425  | 18380 |



|              |                   |            |      |    |               |               |                         |             |       |       |
|--------------|-------------------|------------|------|----|---------------|---------------|-------------------------|-------------|-------|-------|
| SAL_DA4154AA | NY-swgs1378       | SRR1553877 | 2014 | 7  | North America | United States | Enteritidis             | Enteritidis | 1425  | 18379 |
| SAL_DA4156AA | FCC0175           | SRR1553873 | 2010 | 9  | North America | United States | Enteritidis             | Enteritidis | 1425  | 18377 |
| SAL_DA4160AA | NY-swgs1377       | SRR1553865 | 2014 | 7  | North America | United States | Enteritidis             | Enteritidis | 1425  | 18373 |
| SAL_DA4161AA | NY-swgs1371       | SRR1553864 | 2014 | 7  | North America | United States | Enteritidis             | Enteritidis | 1425  | 18372 |
| SAL_DA4164AA | MDH-2014-00907    | SRR1553860 | 2014 | 8  | North America | United States | Enteritidis             | Enteritidis | 1425  | 18369 |
| SAL_DA4169AA | NY-swgs1370       | SRR1553848 | 2014 | 7  | North America | United States | Enteritidis             | Enteritidis | 1425  | 18364 |
| SAL_DA4172AA | NY-swgs1375       | SRR1553845 | 2014 | 7  | North America | United States | Enteritidis             | Enteritidis | 8003  | 18361 |
| SAL_DA4181AA | NY-swgs1372       | SRR1553833 | 2014 | 7  | North America | United States | Enteritidis             | Enteritidis | 1425  | 18353 |
| SAL_DA4194AA | NY-swgs1376       | SRR1553814 | 2014 | 7  | North America | United States | Enteritidis             | Enteritidis | 1425  | 18341 |
| SAL_DA4201AA | FCC0182           | SRR1553805 | 2010 | 10 | North America | United States | Enteritidis             | Enteritidis | 1425  | 18334 |
| SAL_DA4208AA | NY-swgs1369       | SRR1553794 | 2014 | 7  | North America | United States | Enteritidis             | Enteritidis | 1425  | 18327 |
| SAL_DA4228AA | MDH-2014-00905    | SRR1553763 | 2014 | 8  | North America | United States | Enteritidis             | Enteritidis | 1425  | 12315 |
| SAL_DA4230AA | MDH-2014-00904    | SRR1553761 | 2014 | 8  | North America | United States | Enteritidis             | Enteritidis | 1425  | 15673 |
| SAL_DA4232AA | NY-swgs1374       | SRR1553759 | 2014 | 7  | North America | United States | Enteritidis             | Enteritidis | 1425  | 18308 |
| SAL_DA4238AA | FCC0177           | SRR1553751 | 2010 | 9  | North America | United States | Enteritidis             | Enteritidis | 1425  | 18302 |
| SAL_DA4244AA | FCC0174           | SRR1553743 | 2010 | 9  | North America | United States | Enteritidis             | Enteritidis | 1425  | 18297 |
| SAL_DA4245AA | FCC0173           | SRR1553742 | 2010 | 9  | North America | United States | Enteritidis             | Enteritidis | 1425  | 18296 |
| SAL_DA4248AA | NY-swgs1302       | SRR1553735 | 2014 | 5  | North America | United States | Enteritidis             | Enteritidis | 1425  | 18293 |
| SAL_DA4251AA | MDH-2014-00906    | SRR1553731 | 2014 | 8  | North America | United States | Enteritidis             | Enteritidis | 1425  | 18290 |
| SAL_DA4254AA | NY-swgs1309       | SRR1544146 | 2014 | 5  | North America | United States | Enteritidis             | Enteritidis | 1425  | 18287 |
| SAL_DA4352AA | MDH-2014-00901    | SRR1544396 | 2014 | 7  | North America | United States | Enteritidis             | Enteritidis | 7801  | 18211 |
| SAL_DA4399AA | swgs1199          | SRR1544333 | 2014 | 1  | North America | United States | Enteritidis             | Enteritidis | 1425  | 18176 |
| SAL_DA4440AA | swgs1202          | SRR1220758 | 2014 | 1  | North America | United States | Enteritidis             | Enteritidis | 1425  | 18141 |
| SAL_DA4716AA | P184              | ERR025165  |      |    |               |               | Enteritidis (Predicted) | Enteritidis | 1425  | 17948 |
| SAL_DA4717AA | I21               | ERR025166  |      |    |               |               | Enteritidis (Predicted) | Enteritidis | 1425  | 17947 |
| SAL_DA4723AA | I99               | ERR025172  |      |    |               |               | Enteritidis (Predicted) | Enteritidis | 1425  | 17941 |
| SAL_DA4725AA | P43               | ERR025174  |      |    |               |               | Enteritidis (Predicted) | Enteritidis | 1425  | 17940 |
| SAL_DA4728AA | LIV43439          | ERR024947  |      |    |               |               | Enteritidis (Predicted) | Enteritidis | -1714 | 17937 |
| SAL_DA4730AA | U952              | ERR024949  |      |    |               |               | Enteritidis (Predicted) | Enteritidis | 1424  | 17936 |
| SAL_DA4843AA | M281758.7         | ERR024419  |      |    |               |               | Enteritidis (Predicted) | Enteritidis | 1424  | 17834 |
| SAL_DA4969AA | C4810             | ERR023629  |      |    |               |               | Enteritidis (Predicted) | Enteritidis | 1424  | 17731 |
| SAL_DA5026AA | MDH-2014-00898    | SRR1544254 | 2014 | 7  | North America | United States | Enteritidis             | Enteritidis | 1425  | 17689 |
| SAL_DA5061AA | MDH-2014-00900    | SRR1544215 | 2014 | 7  | North America | United States | Enteritidis             | Enteritidis | 1425  | 17661 |
| SAL_DA5080AA | MDH-2014-00897    | SRR1544186 | 2014 | 7  | North America | United States | Enteritidis             | Enteritidis | 1425  | 17646 |
| SAL_DA5105AA | IEH-NGS-SAL-00898 | SRR1544153 | 2007 | 1  | North America | United States |                         | Enteritidis | 1425  | 17625 |
| SAL_DA5157AA | MDH-2014-00896    | SRR1539601 | 2014 | 7  | North America | United States | Enteritidis             | Enteritidis | 1425  | 17577 |
| SAL_DA5223AA | MDH-2014-00895    | SRR1536172 | 2014 | 7  | North America | United States | Enteritidis             | Enteritidis | 1425  | 17527 |
| SAL_DA5224AA | MDH-2014-00885    | SRR1536171 | 2014 | 7  | North America | United States | Enteritidis             | Enteritidis | 1425  | 17526 |
| SAL_DA5227AA | MDH-2014-00892    | SRR1536168 | 2014 | 7  | North America | United States | Enteritidis             | Enteritidis | 1425  | 17523 |
| SAL_DA5228AA | MDH-2014-00889    | SRR1536167 | 2014 | 7  | North America | United States | Enteritidis             | Enteritidis | 1425  | 17522 |
| SAL_DA5229AA | MDH-2014-00887    | SRR1536166 | 2014 | 6  | North America | United States | Enteritidis             | Enteritidis | 1425  | 17507 |
| SAL_DA5234AA | MDH-2014-00893    | SRR1536161 | 2014 | 7  | North America | United States | Enteritidis             | Enteritidis | 1425  | 17517 |
| SAL_DA5235AA | MDH-2014-00884    | SRR1536160 | 2014 | 7  | North America | United States | Enteritidis             | Enteritidis | 1425  | 17516 |
| SAL_DA5238AA | MDH-2014-00883    | SRR1536156 | 2014 | 7  | North America | United States | Enteritidis             | Enteritidis | 1425  | 17515 |
| SAL_DA5239AA | MDH-2014-00882    | SRR1536155 | 2014 | 7  | North America | United States | Enteritidis             | Enteritidis | 1425  | 17453 |
| SAL_DA5240AA | MDH-2014-00894    | SRR1536154 | 2014 | 7  | North America | United States | Enteritidis             | Enteritidis | 1425  | 17514 |
| SAL_DA5241AA | MDH-2014-00888    | SRR1536153 | 2014 | 7  | North America | United States | Enteritidis             | Enteritidis | 1425  | 17513 |
| SAL_DA5246AA | MDH-2014-00890    | SRR1536148 | 2014 | 7  | North America | United States | Enteritidis             | Enteritidis | 27432 | 17508 |
| SAL_DA5247AA | MDH-2014-00886    | SRR1536147 | 2014 | 7  | North America | United States | Enteritidis             | Enteritidis | 1425  | 17507 |
| SAL_DA5251AA | MDH-2014-00891    | SRR1536142 | 2014 | 7  | North America | United States | Enteritidis             | Enteritidis | 1425  | 17503 |
| SAL_DA5289AA | NY-swgs1368       | SRR1534907 | 2014 | 7  | North America | United States | Enteritidis             | Enteritidis | 1425  | 17457 |
| SAL_DA5290AA | NY-swgs1365       | SRR1534905 | 2014 | 6  | North America | United States | Enteritidis             | Enteritidis | 1425  | 17456 |
| SAL_DA5293AA | MDH-2014-00881    | SRR1534902 | 2014 | 7  | North America | United States | Enteritidis             | Enteritidis | 1425  | 17453 |
| SAL_DA5294AA | NY-swgs1366       | SRR1534900 | 2014 | 7  | North America | United States | Enteritidis             | Enteritidis | 8003  | 12492 |
| SAL_DA5295AA | MDH-2014-00855    | SRR1534899 | 2014 | 7  | North America | United States | Enteritidis             | Enteritidis | 1425  | 17452 |
| SAL_DA5296AA | NY-swgs1367       | SRR1534898 | 2014 | 7  | North America | United States | Enteritidis             | Enteritidis | 1425  | 17451 |
| SAL_DA5305AA | MDH-2014-00856    | SRR1534887 | 2014 | 7  | North America | United States | Enteritidis             | Enteritidis | 1425  | 17443 |
| SAL_DA5308AA | MDH-2014-00879    | SRR1534884 | 2014 | 7  | North America | United States | Enteritidis             | Enteritidis | 1425  | 17440 |
| SAL_DA5309AA | MDH-2014-00857    | SRR1534883 | 2014 | 7  | North America | United States | Enteritidis             | Enteritidis | 1425  | 17439 |

|              |                |            |      |    |               |               |             |             |       |       |
|--------------|----------------|------------|------|----|---------------|---------------|-------------|-------------|-------|-------|
| SAL_DA5316AA | MDH-2014-00852 | SRR1534875 | 2014 | 7  | North America | United States | Enteritidis | Enteritidis | 27901 | 17435 |
| SAL_DA5318AA | MDH-2014-00853 | SRR1534868 | 2014 | 7  | North America | United States | Enteritidis | Enteritidis | 27901 | 17433 |
| SAL_DA5323AA | MDH-2014-00850 | SRR1534855 | 2014 | 7  | North America | United States | Enteritidis | Enteritidis | 1425  | 17428 |
| SAL_DA5325AA | MDH-2014-00851 | SRR1534851 | 2014 | 7  | North America | United States | Enteritidis | Enteritidis | 1425  | 4151  |
| SAL_DA5327AA | MDH-2014-00880 | SRR1534849 | 2014 | 7  | North America | United States | Enteritidis | Enteritidis | 1425  | 17425 |
| SAL_DA5328AA | MDH-2014-00854 | SRR1534847 | 2014 | 7  | North America | United States | Enteritidis | Enteritidis | 1425  | 17424 |
| SAL_DA5338AA | MDH-2014-00878 | SRR1534818 | 2014 | 7  | North America | United States | Enteritidis | Enteritidis | 1425  | 16878 |
| SAL_DA5443AA | NY-swgs1364    | SRR1525276 | 2014 | 6  | North America | United States | Enteritidis | Enteritidis | 1425  | 10271 |
| SAL_DA5445AA | NY-swgs1359    | SRR1525274 | 2014 | 6  | North America | United States | Enteritidis | Enteritidis | 1425  | 17325 |
| SAL_DA5446AA | NY-swgs1358    | SRR1525273 | 2014 | 6  | North America | United States | Enteritidis | Enteritidis | 1425  | 17324 |
| SAL_DA5448AA | NY-swgs1360    | SRR1525271 | 2014 | 6  | North America | United States | Enteritidis | Enteritidis | 8003  | 12492 |
| SAL_DA5451AA | NY-swgs1361    | SRR1525268 | 2014 | 6  | North America | United States | Enteritidis | Enteritidis | 1425  | 17321 |
| SAL_DA5453AA | NY-swgs1362    | SRR1525266 | 2014 | 6  | North America | United States | Enteritidis | Enteritidis | 1425  | 17319 |
| SAL_DA5455AA | NY-swgs1363    | SRR1525264 | 2014 | 6  | North America | United States | Enteritidis | Enteritidis | 1425  | 17317 |
| SAL_DA5468AA | NY-swgs1349    | SRR1521602 | 2014 | 6  | North America | United States | Enteritidis | Enteritidis | 3888  | 17304 |
| SAL_DA5469AA | NY-swgs1351    | SRR1521601 | 2014 | 6  | North America | United States | Enteritidis | Enteritidis | 1425  | 17303 |
| SAL_DA5475AA | NY-swgs1355    | SRR1521595 | 2014 | 6  | North America | United States | Enteritidis | Enteritidis | 8003  | 17299 |
| SAL_DA5482AA | NY-swgs1352    | SRR1521588 | 2014 | 6  | North America | United States | Enteritidis | Enteritidis | 1425  | 17293 |
| SAL_DA5485AA | NY-swgs1353    | SRR1521585 | 2014 | 6  | North America | United States | Enteritidis | Enteritidis | 1425  | 17290 |
| SAL_DA5502AA | NY-swgs1357    | SRR1521568 | 2014 | 6  | North America | United States | Enteritidis | Enteritidis | 1425  | 2067  |
| SAL_DA5503AA | NY-swgs1346    | SRR1521567 | 2014 | 6  | North America | United States | Enteritidis | Enteritidis | 1425  | 17277 |
| SAL_DA5504AA | NY-swgs1347    | SRR1521566 | 2014 | 6  | North America | United States | Enteritidis | Enteritidis | 1425  | 17155 |
| SAL_DA5506AA | NY-swgs1348    | SRR1521564 | 2014 | 6  | North America | United States | Enteritidis | Enteritidis | 1425  | 17275 |
| SAL_DA5517AA | NY-swgs1354    | SRR1521523 | 2014 | 6  | North America | United States | Enteritidis | Enteritidis | 1425  | 17266 |
| SAL_DA5519AA | NY-swgs1356    | SRR1521521 | 2014 | 6  | North America | United States | Enteritidis | Enteritidis | 1425  | 17264 |
| SAL_DA5526AA | NY-swgs1350    | SRR1521514 | 2014 | 6  | North America | United States | Enteritidis | Enteritidis | 1425  | 17257 |
| SAL_DA5634AA | NY-swgs1345    | SRR1514767 | 2014 | 6  | North America | United States | Enteritidis | Enteritidis | 1425  | 17166 |
| SAL_DA5640AA | MDH-2014-00843 | SRR1514760 | 2014 | 6  | North America | United States | Enteritidis | Enteritidis | 1425  | 17160 |
| SAL_DA5643AA | MDH-2014-00849 | SRR1514757 | 2014 | 7  | North America | United States | Enteritidis | Enteritidis | 1425  | 12265 |
| SAL_DA5646AA | MDH-2014-00848 | SRR1514753 | 2014 | 7  | North America | United States | Enteritidis | Enteritidis | 1425  | 17155 |
| SAL_DA5658AA | MDH-2014-00847 | SRR1514739 | 2014 | 7  | North America | United States | Enteritidis | Enteritidis | 1425  | 17148 |
| SAL_DA5661AA | MDH-2014-00846 | SRR1514736 | 2014 | 7  | North America | United States | Enteritidis | Enteritidis | 1425  | 17145 |
| SAL_DA5663AA | NY-swgs1264    | SRR1514734 | 2009 | 5  | North America | United States | Enteritidis | Enteritidis | 1425  | 17143 |
| SAL_DA5667AA | NY-swgs1341    | SRR1514730 | 2014 | 6  | North America | United States | Enteritidis | Enteritidis | 1425  | 17140 |
| SAL_DA5670AA | NY-swgs1343    | SRR1514727 | 2014 | 6  | North America | United States | Enteritidis | Enteritidis | 1425  | 17138 |
| SAL_DA5678AA | NY-swgs1344    | SRR1514718 | 2014 | 6  | North America | United States | Enteritidis | Enteritidis | 1425  | 17131 |
| SAL_DA5681AA | FLDOH-50       | SRR1514715 | 2014 | 4  | North America | United States | Enteritidis | Enteritidis | 1425  | 17128 |
| SAL_DA5682AA | MDH-2014-00844 | SRR1514714 | 2014 | 6  | North America | United States | Enteritidis | Enteritidis | 1425  | 17120 |
| SAL_DA5686AA | FLDOH-49       | SRR1514709 | 2014 | 4  | North America | United States | Enteritidis | Enteritidis | 1425  | 17124 |
| SAL_DA5687AA | NY-swgs1342    | SRR1514708 | 2014 | 6  | North America | United States | Enteritidis | Enteritidis | 1425  | 17123 |
| SAL_DA5692AA | MDH-2014-00845 | SRR1514703 | 2014 | 6  | North America | United States | Enteritidis | Enteritidis | 1425  | 17120 |
| SAL_DA5715AA | NY-swgs1333    | SRR1511583 | 2014 | 6  | North America | United States | Enteritidis | Enteritidis | 8003  | 17102 |
| SAL_DA5718AA | NY-swgs1332    | SRR1511580 | 2014 | 5  | North America | United States | Enteritidis | Enteritidis | 1425  | 17099 |
| SAL_DA5722AA | NY-swgs1337    | SRR1511576 | 2014 | 6  | North America | United States | Enteritidis | Enteritidis | 1425  | 17095 |
| SAL_DA5754AA | MDH-2014-00836 | SRR1511544 | 2014 | 6  | North America | United States | Enteritidis | Enteritidis | 1425  | 14388 |
| SAL_DA5755AA | NY-swgs1340    | SRR1511543 | 2014 | 6  | North America | United States | Enteritidis | Enteritidis | 1425  | 17068 |
| SAL_DA5760AA | MDH-2014-00365 | SRR1511538 | 2002 | 12 | North America | United States | Enteritidis | Enteritidis | 1425  | 17063 |
| SAL_DA5780AA | NY-swgs1339    | SRR1511518 | 2014 | 6  | North America | United States | Enteritidis | Enteritidis | 8003  | 12492 |
| SAL_DA5786AA | NY-swgs1334    | SRR1511512 | 2014 | 6  | North America | United States | Enteritidis | Enteritidis | 1425  | 16811 |
| SAL_DA5794AA | NY-swgs1338    | SRR1511503 | 2014 | 6  | North America | United States | Enteritidis | Enteritidis | 1425  | 15038 |
| SAL_DA5803AA | NY-swgs1336    | SRR1511494 | 2014 | 6  | North America | United States | Enteritidis | Enteritidis | 1425  | 17029 |
| SAL_DA5804AA | NY-swgs1335    | SRR1511493 | 2014 | 6  | North America | United States | Enteritidis | Enteritidis | 1425  | 17028 |
| SAL_DA5805AA | CFSAN018635    | SRR1511492 | 2007 | 1  | North America | United States | Enteritidis | Enteritidis | 1425  | 17027 |
| SAL_DA5889AA | FDA00001496    | SRR1503325 | 2010 | 12 | Asia          | China         | Enteritidis | Enteritidis | 1425  | 16960 |
| SAL_DA5916AA | CFSAN018529    | SRR1501708 | 2007 | 1  | North America | United States | Enteritidis | Enteritidis | 1425  | 13840 |
| SAL_DA5920AA | CFSAN018539    | SRR1501704 | 2007 | 1  | North America | United States | Enteritidis | Enteritidis | 1425  | 13840 |
| SAL_DA5982AA | MDH-2014-00835 | SRR1501640 | 2014 | 6  | North America | United States | Enteritidis | Enteritidis | 1425  | 16878 |
| SAL_DA6020AA | MDH-2014-00834 | SRR1501484 | 2014 | 6  | North America | United States | Enteritidis | Enteritidis | 1425  | 16845 |
| SAL_DA6032AA | CFSAN018518    | SRR1501472 | 2007 | 1  | North America | United States | Enteritidis | Enteritidis | 8469  | 16833 |

|              |                |            |      |   |               |               |             |             |       |       |
|--------------|----------------|------------|------|---|---------------|---------------|-------------|-------------|-------|-------|
| SAL_DA6051AA | NY-swgs1331    | SRR1482402 | 2014 | 5 | North America | United States | Enteritidis | Enteritidis | 1425  | 14321 |
| SAL_DA6052AA | NY-swgs1330    | SRR1482401 | 2014 | 5 | North America | United States | Enteritidis | Enteritidis | 1425  | 16815 |
| SAL_DA6053AA | NY-swgs1324    | SRR1482400 | 2014 | 5 | North America | United States | Enteritidis | Enteritidis | 1425  | 16814 |
| SAL_DA6054AA | NY-swgs1322    | SRR1482399 | 2014 | 5 | North America | United States | Enteritidis | Enteritidis | 1425  | 16813 |
| SAL_DA6055AA | NY-swgs1321    | SRR1482398 | 2014 | 6 | North America | United States | Enteritidis | Enteritidis | 1425  | 16812 |
| SAL_DA6058AA | NY-swgs1329    | SRR1482392 | 2014 | 6 | North America | United States | Enteritidis | Enteritidis | 1425  | 16807 |
| SAL_DA6059AA | NY-swgs1323    | SRR1482391 | 2014 | 5 | North America | United States | Enteritidis | Enteritidis | 1425  | 16811 |
| SAL_DA6060AA | NY-swgs1318    | SRR1482389 | 2014 | 5 | North America | United States | Enteritidis | Enteritidis | 1425  | 16810 |
| SAL_DA6061AA | NY-swgs1325    | SRR1482386 | 2014 | 5 | North America | United States | Enteritidis | Enteritidis | 1425  | 16809 |
| SAL_DA6063AA | NY-swgs1327    | SRR1482384 | 2014 | 5 | North America | United States | Enteritidis | Enteritidis | 1425  | 16808 |
| SAL_DA6064AA | NY-swgs1326    | SRR1482383 | 2014 | 5 | North America | United States | Enteritidis | Enteritidis | 1425  | 14321 |
| SAL_DA6065AA | NY-swgs1319    | SRR1482382 | 2014 | 5 | North America | United States | Enteritidis | Enteritidis | 1425  | 651   |
| SAL_DA6066AA | NY-swgs1328    | SRR1482378 | 2014 | 5 | North America | United States | Enteritidis | Enteritidis | 1425  | 16807 |
| SAL_DA6067AA | NY-swgs1320    | SRR1482377 | 2014 | 5 | North America | United States | Enteritidis | Enteritidis | 1425  | 16807 |
| SAL_DA6073AA | FNE0130        | SRR1481932 | 2013 | 3 | Asia          | China         | Enteritidis | Enteritidis | 1425  | 16802 |
| SAL_DA6094AA | NY-swgs1317    | SRR1481687 | 2014 | 5 | North America | United States | Enteritidis | Enteritidis | 1425  | 16783 |
| SAL_DA6097AA | FLDOH-40       | SRR1481682 | 2014 | 3 | North America | United States | Enteritidis | Enteritidis | 1425  | 16780 |
| SAL_DA6101AA | FLDOH-48       | SRR1481676 | 2014 | 3 | North America | United States | Enteritidis | Enteritidis | 8003  | 16776 |
| SAL_DA6106AA | FLDOH-41       | SRR1481671 | 2014 | 3 | North America | United States | Enteritidis | Enteritidis | 1425  | 16772 |
| SAL_DA6107AA | FLDOH-33       | SRR1481670 | 2014 | 2 | North America | United States | Enteritidis | Enteritidis | 1425  | 16771 |
| SAL_DA6108AA | FLDOH-39       | SRR1481669 | 2014 | 2 | North America | United States | Enteritidis | Enteritidis | 1425  | 16770 |
| SAL_DA6115AA | FLDOH-42       | SRR1481661 | 2014 | 3 | North America | United States | Enteritidis | Enteritidis | 3888  | 16763 |
| SAL_DA6154AA | FSE0166        | SRR1449930 | 2011 | 7 | North America | United States | Enteritidis | Enteritidis | 1425  | 16728 |
| SAL_DA6155AA | FSE0162        | SRR1449929 | 2011 | 7 | North America | United States | Enteritidis | Enteritidis | 1425  | 16727 |
| SAL_DA6156AA | FSE0168        | SRR1449927 | 2011 | 7 | North America | United States | Enteritidis | Enteritidis | 1425  | 16726 |
| SAL_DA6157AA | FSE0160        | SRR1449926 | 2011 | 7 | North America | United States | Enteritidis | Enteritidis | 1425  | 16725 |
| SAL_DA6158AA | FSE0158        | SRR1449925 | 2011 | 5 | Africa        | Ethiopia      | Ramatgan    | Enteritidis | 27697 | 16724 |
| SAL_DA6159AA | FSE0167        | SRR1449924 | 2011 | 7 | North America | United States | Enteritidis | Enteritidis | 1425  | 16723 |
| SAL_DA6161AA | FSE0169        | SRR1449922 | 2011 | 7 | North America | United States | Enteritidis | Enteritidis | 1425  | 16721 |
| SAL_DA6162AA | FSE0165        | SRR1449921 | 2011 | 7 | North America | Costa Rica    | Sandiego    | Enteritidis | 1425  | 16720 |
| SAL_DA6163AA | FSE0161        | SRR1449920 | 2011 | 7 | North America | United States | Enteritidis | Enteritidis | 1425  | 16719 |
| SAL_DA6164AA | FSE0159        | SRR1449919 | 2011 | 7 | North America | United States | Enteritidis | Enteritidis | 1425  | 16718 |
| SAL_DA6167AA | FLDOH-27       | SRR1448937 | 2014 | 1 | North America | United States | Enteritidis | Enteritidis | 1425  | 16715 |
| SAL_DA6170AA | MDH-2014-00832 | SRR1448934 | 2014 | 6 | North America | United States | Enteritidis | Enteritidis | 1425  | 16712 |
| SAL_DA6183AA | MDH-2014-00833 | SRR1448887 | 2014 | 6 | North America | United States | Enteritidis | Enteritidis | 1425  | 16702 |
| SAL_DA6216AA | FSE0147        | SRR1427724 | 2011 | 4 | North America | United States | Enteritidis | Enteritidis | 1425  | 16670 |
| SAL_DA6221AA | FSE0152        | SRR1427719 | 2011 | 5 | North America | United States | Enteritidis | Enteritidis | 1425  | 16666 |
| SAL_DA6230AA | FSE0145        | SRR1427710 | 2011 | 4 | North America | United States | Enteritidis | Enteritidis | 1425  | 16657 |
| SAL_DA6232AA | FSE0138        | SRR6071648 | 2011 | 3 | North America | United States | Enteritidis | Enteritidis | 1425  | 16655 |
| SAL_DA6233AA | FSE0150        | SRR1427706 | 2011 | 5 | North America | United States | Enteritidis | Enteritidis | 1425  | 16654 |
| SAL_DA6238AA | NY-swgs1305    | SRR1427107 | 2014 | 5 | North America | United States | Enteritidis | Enteritidis | 8003  | 12492 |
| SAL_DA6239AA | NY-swgs1298    | SRR1427106 | 2014 | 5 | North America | United States | Enteritidis | Enteritidis | 1425  | 12315 |
| SAL_DA6243AA | NY-swgs1313    | SRR1427102 | 2014 | 5 | North America | United States | Enteritidis | Enteritidis | 1425  | 16644 |
| SAL_DA6244AA | NY-swgs1310    | SRR1427101 | 2014 | 5 | North America | United States | Enteritidis | Enteritidis | 1425  | 16646 |
| SAL_DA6245AA | NY-swgs1307    | SRR1427100 | 2014 | 5 | North America | United States | Enteritidis | Enteritidis | 1425  | 16645 |
| SAL_DA6246AA | NY-swgs1297    | SRR1427099 | 2014 | 5 | North America | United States | Enteritidis | Enteritidis | 1425  | 16644 |
| SAL_DA6249AA | NY-swgs1304    | SRR1427096 | 2014 | 5 | North America | United States | Enteritidis | Enteritidis | 1425  | 16641 |
| SAL_DA6250AA | NY-swgs1301    | SRR1427095 | 2014 | 5 | North America | United States | Enteritidis | Enteritidis | 1425  | 16611 |
| SAL_DA6251AA | NY-swgs1300    | SRR1427094 | 2014 | 5 | North America | United States | Enteritidis | Enteritidis | 1425  | 16640 |
| SAL_DA6252AA | NY-swgs1296    | SRR1427093 | 2014 | 5 | North America | United States | Enteritidis | Enteritidis | 1425  | 16639 |
| SAL_DA6255AA | NY-swgs1314    | SRR1427090 | 2014 | 4 | North America | United States | Enteritidis | Enteritidis | 1425  | 16636 |
| SAL_DA6256AA | NY-swgs1311    | SRR1427089 | 2014 | 5 | North America | United States | Enteritidis | Enteritidis | 1425  | 16635 |
| SAL_DA6257AA | NY-swgs1303    | SRR1427088 | 2014 | 5 | North America | United States | Enteritidis | Enteritidis | 1425  | 16634 |
| SAL_DA6261AA | NY-swgs1312    | SRR1427084 | 2014 | 5 | North America | United States | Enteritidis | Enteritidis | 1425  | 16630 |
| SAL_DA6262AA | NY-swgs1306    | SRR1427083 | 2014 | 5 | North America | United States | Enteritidis | Enteritidis | 1425  | 2067  |
| SAL_DA6263AA | NY-swgs1299    | SRR1427082 | 2014 | 5 | North America | United States | Enteritidis | Enteritidis | 7801  | 16629 |
| SAL_DA6283AA | NY-swgs1295    | SRR1425273 | 2014 | 5 | North America | United States | Enteritidis | Enteritidis | 1425  | 16611 |
| SAL_DA6291AA | MDH-2014-00831 | SRR1425265 | 2014 | 6 | North America | United States | Enteritidis | Enteritidis | 1425  | 16605 |
| SAL_DA6292AA | NY-swgs1293    | SRR1425264 | 2014 | 4 | North America | United States | Enteritidis | Enteritidis | 1425  | 16604 |

|              |                |            |      |    |               |               |             |             |       |       |
|--------------|----------------|------------|------|----|---------------|---------------|-------------|-------------|-------|-------|
| SAL_DA6296AA | MDH-2014-00823 | SRR1425243 | 2014 | 5  | North America | United States | Enteritidis | Enteritidis | 1425  | 16602 |
| SAL_DA6297AA | NY-swgs1294    | SRR1425242 | 2014 | 5  | North America | United States | Enteritidis | Enteritidis | 1425  | 16601 |
| SAL_DA6301AA | MDH-2014-00825 | SRR1422845 | 2014 | 4  | North America | United States | Enteritidis | Enteritidis | 1425  | 16597 |
| SAL_DA6307AA | MDH-2014-00828 | SRR1422670 | 2014 | 6  | North America | United States | Enteritidis | Enteritidis | 1425  | 16591 |
| SAL_DA6310AA | MDH-2014-00826 | SRR1422665 | 2014 | 5  | North America | United States | Enteritidis | Enteritidis | 1425  | 16588 |
| SAL_DA6311AA | MDH-2014-00824 | SRR1422663 | 2014 | 5  | North America | United States | Enteritidis | Enteritidis | 1425  | 14335 |
| SAL_DA6313AA | MDH-2014-00830 | SRR1422661 | 2014 | 5  | North America | United States | Enteritidis | Enteritidis | 8003  | 16586 |
| SAL_DA6314AA | MDH-2014-00827 | SRR1422660 | 2014 | 6  | North America | United States | Enteritidis | Enteritidis | 1425  | 16585 |
| SAL_DA6333AA | MDH-2014-00829 | SRR1422539 | 2014 | 5  | North America | United States | Enteritidis | Enteritidis | 1425  | 16566 |
| SAL_DA6343AA | FLDOH-15       | SRR1411168 | 2013 | 12 | North America | United States |             | Enteritidis | 1425  | 16558 |
| SAL_DA6353AA | FMA0192        | SRR1411152 | 2011 | 10 | Asia          | Turkey        | Enteritidis | Enteritidis | 1425  | 16548 |
| SAL_DA6362AA | FMA0198        | SRR1411138 | 2011 | 11 | North America | United States | Enteritidis | Enteritidis | 1425  | 16540 |
| SAL_DA6387AA | FMA0193        | SRR1411106 | 2011 | 10 | Asia          | Turkey        | Enteritidis | Enteritidis | 1425  | 11004 |
| SAL_DA6391AA | MDH-2014-00817 | SRR1395323 | 2014 | 5  | North America | United States | Enteritidis | Enteritidis | 1425  | 16512 |
| SAL_DA6398AA | MDH-2014-00816 | SRR1395308 | 2014 | 5  | North America | United States | Enteritidis | Enteritidis | 1425  | 16507 |
| SAL_DA6440AA | 2012K-0501     | SRR1379787 | 2012 |    | North America | United States | Enteritidis | Enteritidis | 1425  | 16475 |
| SAL_DA6441AA | 2012K-0500     | SRR1379786 | 2012 |    | North America | United States | Enteritidis | Enteritidis | 1425  | 16474 |
| SAL_DA6442AA | 2012K-0499     | SRR1379785 | 2012 |    | North America | United States | Enteritidis | Enteritidis | 1425  | 16473 |
| SAL_DA6443AA | 2011K-0104     | SRR1379784 | 2011 |    | North America | United States | Enteritidis | Enteritidis | 1425  | 16472 |
| SAL_DA6444AA | 2011K-0079     | SRR1379783 | 2011 |    | North America | United States | Enteritidis | Enteritidis | 1425  | 16471 |
| SAL_DA6445AA | 2011K-0019     | SRR1379782 | 2011 |    | North America | United States | Enteritidis | Enteritidis | 1425  | 16470 |
| SAL_DA6446AA | 2010K-2617     | SRR1379781 | 2011 |    | North America | United States | Enteritidis | Enteritidis | 1425  | 16469 |
| SAL_DA6447AA | 2009K-1562     | SRR1379780 | 2009 |    | North America | United States | Enteritidis | Enteritidis | 1425  | 16468 |
| SAL_DA6448AA | 2009K-1559     | SRR1379779 | 2009 |    | North America | United States | Enteritidis | Enteritidis | 1425  | 16468 |
| SAL_DA6449AA | 2009K-1553     | SRR1379778 | 2009 |    | North America | United States | Enteritidis | Enteritidis | 1425  | 16468 |
| SAL_DA6450AA | 2009K-1545     | SRR1379777 | 2009 |    | North America | United States | Enteritidis | Enteritidis | 1425  | 6403  |
| SAL_DA6451AA | K2083          | SRR1379776 | 2005 |    | North America | United States | Enteritidis | Enteritidis | 1425  | 14261 |
| SAL_DA6452AA | K2082          | SRR1379775 | 2005 |    | North America | United States | Enteritidis | Enteritidis | 1425  | 16467 |
| SAL_DA6453AA | K3310          | SRR1379774 | 2006 |    | North America | United States | Enteritidis | Enteritidis | 1425  | 16466 |
| SAL_DA6454AA | K3308          | SRR1379773 | 2006 |    | North America | United States | Enteritidis | Enteritidis | 1425  | 15184 |
| SAL_DA6455AA | K2331          | SRR1379772 | 2005 |    | North America | United States | Enteritidis | Enteritidis | 1425  | 16465 |
| SAL_DA6456AA | K2330          | SRR1379771 | 2005 |    | North America | United States | Enteritidis | Enteritidis | 1425  | 16464 |
| SAL_DA6457AA | H9558          | SRR1379770 | 2003 |    | North America | United States | Enteritidis | Enteritidis | 27569 | 16463 |
| SAL_DA6458AA | H9556          | SRR1379769 | 2003 |    | North America | United States | Enteritidis | Enteritidis | 27569 | 16462 |
| SAL_DA6459AA | J0905          | SRR1379768 | 2001 |    | North America | United States | Enteritidis | Enteritidis | 1425  | 16461 |
| SAL_DA6460AA | J0900          | SRR1379767 | 2001 |    | North America | United States | Enteritidis | Enteritidis | 1425  | 16461 |
| SAL_DA6462AA | 2012K-0597     | SRR1379765 | 2012 |    | North America | United States | Enteritidis | Enteritidis | 1425  | 16459 |
| SAL_DA6463AA | 2012K-0619     | SRR1379764 | 2012 |    | North America | United States | Enteritidis | Enteritidis | 1425  | 16458 |
| SAL_DA6464AA | 2012K-0644     | SRR1379763 | 2012 |    | North America | United States | Enteritidis | Enteritidis | 1425  | 13381 |
| SAL_DA6465AA | 2012K-0628     | SRR1379762 | 2012 |    | North America | United States | Enteritidis | Enteritidis | 1425  | 13381 |
| SAL_DA6466AA | 2012K-0627     | SRR1379761 | 2012 |    | North America | United States | Enteritidis | Enteritidis | 1425  | 16457 |
| SAL_DA6469AA | 2011K-1846     | SRR1379758 | 2011 |    | North America | United States | Enteritidis | Enteritidis | 1425  | 16455 |
| SAL_DA6470AA | 2011K-1845     | SRR1379757 | 2011 |    | North America | United States | Enteritidis | Enteritidis | 1425  | 16454 |
| SAL_DA6471AA | 2011K-1668     | SRR1379756 | 2011 |    | North America | United States | Enteritidis | Enteritidis | 1425  | 11004 |
| SAL_DA6472AA | 2011K-1667     | SRR1379755 | 2011 | 10 | North America | United States | Enteritidis | Enteritidis | 1425  | 11004 |
| SAL_DA6473AA | 2010K-0675     | SRR1379754 | 2010 |    | North America | United States | Enteritidis | Enteritidis | 1425  | 16453 |
| SAL_DA6474AA | 2010K-0678     | SRR1379753 | 2010 |    | North America | United States | Enteritidis | Enteritidis | 1425  | 16452 |
| SAL_DA6475AA | 2010K-0677     | SRR1379752 | 2010 |    | North America | United States | Enteritidis | Enteritidis | 1425  | 16450 |
| SAL_DA6476AA | 2010K-0673     | SRR1379751 | 2010 |    | North America | United States | Enteritidis | Enteritidis | 1425  | 16450 |
| SAL_DA6477AA | 2010K-0672     | SRR1379750 | 2010 |    | North America | United States | Enteritidis | Enteritidis | 1425  | 16450 |
| SAL_DA6478AA | 2010K-0669     | SRR1379749 | 2010 |    | North America | United States | Enteritidis | Enteritidis | 1425  | 16451 |
| SAL_DA6479AA | 2010K-0668     | SRR1379748 | 2010 |    | North America | United States | Enteritidis | Enteritidis | 1425  | 16450 |
| SAL_DA6480AA | 2010K-0667     | SRR1379747 | 2010 |    | North America | United States | Enteritidis | Enteritidis | 1425  | 16450 |
| SAL_DA6481AA | 2010K-0666     | SRR1379746 | 2010 |    | North America | United States | Enteritidis | Enteritidis | 1425  | 16450 |
| SAL_DA6482AA | 2010K-1947     | SRR1379745 | 2010 |    | North America | United States | Enteritidis | Enteritidis | 1425  | 16449 |
| SAL_DA6483AA | 2010K-1946     | SRR1379744 | 2010 |    | North America | United States | Enteritidis | Enteritidis | 1425  | 16448 |
| SAL_DA6484AA | 2010K-0362     | SRR1379743 | 2009 |    | Africa        | Mauritius     | Enteritidis | Enteritidis | 3888  | 16447 |
| SAL_DA6485AA | 2010K-0358     | SRR1379742 | 2009 |    | Africa        | Mauritius     | Enteritidis | Enteritidis | 3888  | 16446 |
| SAL_DA6486AA | 2010K-0351     | SRR1379741 | 2009 |    | Africa        | Mauritius     | Enteritidis | Enteritidis | 3888  | 16445 |

|              |                   |            |      |   |               |                |                         |             |       |       |
|--------------|-------------------|------------|------|---|---------------|----------------|-------------------------|-------------|-------|-------|
| SAL_DA6487AA | 2010K-0348        | SRR1379740 | 2009 |   | Africa        | Mauritius      | Enteritidis             | Enteritidis | 3888  | 16444 |
| SAL_DA6488AA | 2010K-0338        | SRR1379739 | 2009 |   | Africa        | Mauritius      | Enteritidis             | Enteritidis | 3888  | 16443 |
| SAL_DA6489AA | 2012K-0283        | SRR1379738 | 2012 |   | North America | United States  | Enteritidis             | Enteritidis | 1425  | 16442 |
| SAL_DA6490AA | 2012K-0285        | SRR1379737 | 2012 |   | North America | United States  | Enteritidis             | Enteritidis | 1425  | 16441 |
| SAL_DA6491AA | 2012K-0284        | SRR1379736 | 2012 |   | North America | United States  | Enteritidis             | Enteritidis | 1425  | 16440 |
| SAL_DA6592AA | CFSAN018300       | SRR1346329 | 2014 | 5 | North America | United States  | Enteritidis             | Enteritidis | 1425  | 16358 |
| SAL_DA6593AA | CFSAN018298       | SRR1346328 | 2014 | 5 | North America | United States  | Enteritidis             | Enteritidis | 1425  | 16357 |
| SAL_DA6594AA | NY-swgs1291       | SRR1346327 | 2014 | 5 | North America | United States  | Enteritidis             | Enteritidis | 1425  | 16356 |
| SAL_DA6596AA | CFSAN018305       | SRR1346325 | 2014 | 5 | North America | United States  | Enteritidis             | Enteritidis | 1425  | 16354 |
| SAL_DA6597AA | CFSAN018302       | SRR1346324 | 2014 | 5 | North America | United States  | Enteritidis             | Enteritidis | 1425  | 16353 |
| SAL_DA6598AA | NY-swgs1287       | SRR1346323 | 2014 | 5 | North America | United States  | Enteritidis             | Enteritidis | 1425  | 16352 |
| SAL_DA6604AA | IEH-NGS-SAL-00593 | SRR1346317 | 2014 | 5 | North America | United States  | Enteritidis             | Enteritidis | 1425  | 16346 |
| SAL_DA6610AA | NY-swgs1284       | SRR1346311 | 2014 | 5 | North America | United States  | Enteritidis             | Enteritidis | 1425  | 16341 |
| SAL_DA6613AA | CFSAN018312       | SRR1346308 | 2014 | 5 | North America | United States  | Enteritidis             | Enteritidis | 1425  | 16339 |
| SAL_DA6617AA | CFSAN018306       | SRR1346304 | 2014 | 5 | North America | United States  | Enteritidis             | Enteritidis | 1425  | 16335 |
| SAL_DA6618AA | CFSAN018301       | SRR1346303 | 2014 | 5 | North America | United States  | Enteritidis             | Enteritidis | 1425  | 16334 |
| SAL_DA6620AA | CFSAN018299       | SRR1346301 | 2014 | 5 | North America | United States  | Enteritidis             | Enteritidis | 1425  | 16332 |
| SAL_DA6621AA | CFSAN018293       | SRR1346300 | 2014 | 5 | North America | United States  | Enteritidis             | Enteritidis | 3900  | 16331 |
| SAL_DA6624AA | CFSAN018309       | SRR1346297 | 2014 | 5 | North America | United States  | Enteritidis             | Enteritidis | 1425  | 16328 |
| SAL_DA6625AA | CFSAN018303       | SRR1346296 | 2014 | 5 | North America | United States  | Enteritidis             | Enteritidis | 1425  | 16327 |
| SAL_DA6627AA | NY-swgs1288       | SRR1346293 | 2014 | 5 | North America | United States  | Enteritidis             | Enteritidis | 1425  | 16325 |
| SAL_DA6628AA | NY-swgs1285       | SRR1346292 | 2014 | 5 | North America | United States  | Enteritidis             | Enteritidis | 1425  | 16324 |
| SAL_DA6634AA | IEH-NGS-SAL-00596 | SRR1346285 | 2014 | 5 | North America | United States  | Enteritidis             | Enteritidis | 1425  | 16320 |
| SAL_DA6643AA | CFSAN018304       | SRR1346276 | 2014 | 5 | North America | United States  | Enteritidis             | Enteritidis | 1425  | 16311 |
| SAL_DA6644AA | NY-swgs1290       | SRR1346275 | 2014 | 5 | North America | United States  | Enteritidis             | Enteritidis | 1425  | 14321 |
| SAL_DA6650AA | NY-swgs1292       | SRR1346268 | 2014 | 5 | North America | United States  | Enteritidis             | Enteritidis | 1425  | 16305 |
| SAL_DA6651AA | FMA0175           | SRR1346267 | 2011 | 9 | Asia          | China          | Enteritidis             | Enteritidis | 1425  | 16303 |
| SAL_DA6659AA | NY-swgs1286       | SRR1346259 | 2014 | 5 | North America | United States  | Enteritidis             | Enteritidis | 1425  | 16296 |
| SAL_DA6662AA | IEH-NGS-SAL-00599 | SRR1346256 | 2014 | 5 | North America | United States  | Enteritidis             | Enteritidis | 1425  | 10599 |
| SAL_DA6666AA | CFSAN018297       | SRR1346251 | 2014 | 5 | North America | United States  | Enteritidis             | Enteritidis | 8384  | 16292 |
| SAL_DA6669AA | CFSAN018308       | SRR1346248 | 2014 | 5 | North America | United States  | Enteritidis             | Enteritidis | 1425  | 16289 |
| SAL_DA6672AA | CFSAN018296       | SRR1346245 | 2014 | 5 | North America | United States  | Enteritidis             | Enteritidis | 1425  | 16286 |
| SAL_DA6673AA | CFSAN018295       | SRR1346244 | 2014 | 5 | North America | United States  | Enteritidis             | Enteritidis | 1425  | 16285 |
| SAL_DA6674AA | CFSAN018294       | SRR1346243 | 2014 | 5 | North America | United States  | Enteritidis             | Enteritidis | 1425  | 16284 |
| SAL_DA6675AA | NY-swgs1289       | SRR1346242 | 2014 | 5 | North America | United States  | Enteritidis             | Enteritidis | 1425  | 16283 |
| SAL_DA6692AA | MDH-2014-00815    | SRR1334667 | 2014 | 5 | North America | United States  | Enteritidis             | Enteritidis | 1425  | 14388 |
| SAL_DA6711AA | MDH-2014-00813    | SRR1334489 | 2014 | 5 | North America | United States  | Enteritidis             | Enteritidis | 1425  | 16254 |
| SAL_DA6715AA | MDH-2014-00814    | SRR1334485 | 2014 | 5 | North America | United States  | Enteritidis             | Enteritidis | 1425  | 14335 |
| SAL_DA6716AA | NY-swgs1279       | SRR1334484 | 2014 | 4 | North America | United States  | Enteritidis             | Enteritidis | 1425  | 15921 |
| SAL_DA6735AA | NY-swgs1283       | SRR1334227 | 2014 | 5 | North America | United States  | Enteritidis             | Enteritidis | 1425  | 16241 |
| SAL_DA6740AA | NY-swgs1281       | SRR1334179 | 2014 | 4 | North America | United States  | Enteritidis             | Enteritidis | 26543 | 16237 |
| SAL_DA6741AA | NY-swgs1280       | SRR1334178 | 2014 | 4 | North America | United States  | Enteritidis             | Enteritidis | 1425  | 16236 |
| SAL_DA6765AA | NY-swgs1282       | SRR1333885 | 2014 | 4 | North America | United States  | Enteritidis             | Enteritidis | 1425  | 16216 |
| SAL_DA6792AA | Enteritidis       | SRR1321142 | 2012 |   | Europe        | United Kingdom | Enteritidis             | Enteritidis | 7811  | 16193 |
| SAL_DA6796AA | FDA00004360       | SRR1302870 | 2014 | 3 | North America | United States  | Enteritidis (Predicted) | Enteritidis | 1425  | 16190 |
| SAL_DA6801AA | MDH-2014-00810    | SRR1302865 | 2014 | 5 | North America | United States  | Enteritidis             | Enteritidis | 1425  | 16186 |
| SAL_DA6805AA | MDH-2014-00811    | SRR1302861 | 2014 | 5 | North America | United States  | Enteritidis             | Enteritidis | 1425  | 14335 |
| SAL_DA6819AA | MDH-2014-00809    | SRR1302838 | 2014 | 5 | North America | United States  | Enteritidis             | Enteritidis | 1425  | 16172 |
| SAL_DA6820AA | MDH-2014-00808    | SRR1302837 | 2014 | 5 | North America | United States  | Enteritidis             | Enteritidis | 1425  | 16171 |
| SAL_DA6821AA | FDA00004362       | SRR1302836 | 2014 | 3 | North America | United States  | Enteritidis (Predicted) | Enteritidis | 1425  | 16170 |
| SAL_DA6824AA | MDH-2014-00812    | SRR1302833 | 2014 | 5 | North America | United States  | Enteritidis             | Enteritidis | 1425  | 16167 |
| SAL_DA6826AA | FDA00004363       | SRR1302828 | 2014 | 3 | North America | United States  | Enteritidis (Predicted) | Enteritidis | 1425  | 16165 |
| SAL_DA6876AA | NY-swgs1276       | SRR1300735 | 2014 | 4 | North America | United States  | Enteritidis             | Enteritidis | 1425  | 16120 |
| SAL_DA6880AA | MDH-2014-00804    | SRR1300731 | 2014 | 5 | North America | United States  | Enteritidis             | Enteritidis | 1425  | 16081 |
| SAL_DA6887AA | NY-swgs1266       | SRR1300723 | 2014 | 4 | North America | United States  | Enteritidis             | Enteritidis | 1425  | 16110 |
| SAL_DA6898AA | NY-swgs1268       | SRR1300712 | 2014 | 4 | North America | United States  | Enteritidis             | Enteritidis | 1425  | 16099 |
| SAL_DA6903AA | MDH-2014-00803    | SRR1300707 | 2014 | 5 | North America | United States  | Enteritidis             | Enteritidis | 1425  | 15038 |
| SAL_DA6910AA | NY-swgs1278       | SRR1300700 | 2014 |   | North America | United States  | Enteritidis             | Enteritidis | 1425  | 16088 |
| SAL_DA6916AA | MDH-2014-00806    | SRR1300694 | 2014 | 5 | North America | United States  | Enteritidis             | Enteritidis | 1425  | 16082 |

|              |                           |            |      |    |               |               |                         |             |       |       |
|--------------|---------------------------|------------|------|----|---------------|---------------|-------------------------|-------------|-------|-------|
| SAL_DA6917AA | MDH-2014-00802            | SRR1300693 | 2014 | 5  | North America | United States | Enteritidis             | Enteritidis | 1425  | 16081 |
| SAL_DA6937AA | MDH-2014-00805            | SRR1300671 | 2014 | 5  | North America | United States | Enteritidis             | Enteritidis | 1425  | 15673 |
| SAL_DA6940AA | NY-swgs1272               | SRR1300668 | 2014 | 4  | North America | United States | Enteritidis             | Enteritidis | 1425  | 16061 |
| SAL_DA6954AA | NY-swgs1277               | SRR1300650 | 2014 | 4  | North America | United States | Enteritidis             | Enteritidis | 1425  | 16051 |
| SAL_DA6958AA | FL-NRM042                 | SRR1300645 | 2004 |    | North America | United States | Enteritidis             | Enteritidis | 1425  | 16047 |
| SAL_DA6960AA | NY-swgs1274               | SRR1300643 | 2014 | 4  | North America | United States | Enteritidis             | Enteritidis | 1425  | 16045 |
| SAL_DA6975AA | NY-swgs1269               | SRR1300627 | 2014 | 4  | North America | United States | Enteritidis             | Enteritidis | 1425  | 16032 |
| SAL_DA6991AA | NY-swgs1271               | SRR1300601 | 2014 | 4  | North America | United States | Enteritidis             | Enteritidis | 1425  | 16017 |
| SAL_DA6997AA | NY-swgs1273               | SRR1300594 | 2014 | 4  | North America | United States | Enteritidis             | Enteritidis | 1425  | 16012 |
| SAL_DA6998AA | MDH-2014-00800            | SRR1300593 | 2014 | 5  | North America | United States | Enteritidis             | Enteritidis | 1425  | 14388 |
| SAL_DA6999AA | FMA0169                   | SRR1300592 | 2011 | 8  | Asia          | Syria         | Enteritidis             | Enteritidis | 27438 | 16011 |
| SAL_DA7008AA | NY-swgs1267               | SRR1300583 | 2014 | 4  | North America | United States | Enteritidis             | Enteritidis | 1425  | 16004 |
| SAL_DA7015AA | NY-swgs1270               | SRR1300566 | 2014 | 4  | North America | United States | Enteritidis             | Enteritidis | 1425  | 14339 |
| SAL_DA7021AA | NY-swgs1275               | SRR1300560 | 2014 | 4  | North America | United States | Enteritidis             | Enteritidis | 1425  | 15992 |
| SAL_DA7030AA | VA-WGS-00247              | SRR1299434 | 2010 | 4  | North America | United States | Enteritidis             | Enteritidis | 1425  | 15983 |
| SAL_DA7041AA | WAPHL-SAL-A00337          | SRR1299423 | 2002 |    | North America | United States | Enteritidis             | Enteritidis | 1425  | 14768 |
| SAL_DA7044AA | NY-swgs1261               | SRR1299420 | 2014 | 4  | North America | United States | Enteritidis             | Enteritidis | 1425  | 15972 |
| SAL_DA7048AA | VA-WGS-00246              | SRR1299399 | 2010 | 4  | North America | United States | Enteritidis             | Enteritidis | 1425  | 15968 |
| SAL_DA7054AA | NY-swgs1259               | SRR1299392 | 2014 | 4  | North America | United States | Enteritidis             | Enteritidis | 1425  | 15963 |
| SAL_DA7078AA | NY-swgs1262               | SRR1299360 | 2014 | 4  | North America | United States | Enteritidis             | Enteritidis | 1425  | 15944 |
| SAL_DA7079AA | NY-swgs1258               | SRR1299359 | 2014 | 4  | North America | United States | Enteritidis             | Enteritidis | 1425  | 15943 |
| SAL_DA7109AA | NY-swgs1257               | SRR1299295 | 2014 | 4  | North America | United States | Enteritidis             | Enteritidis | 1425  | 15921 |
| SAL_DA7132AA | MDH-2014-00009            | SRR1299270 | 2003 | 8  | North America | United States | Enteritidis             | Enteritidis | 7801  | 15900 |
| SAL_DA7140AA | NY-swgs1263               | SRR1299215 | 2014 | 4  | North America | United States | Enteritidis             | Enteritidis | 1425  | 15892 |
| SAL_DA7147AA | FDA00000036               | SRR1292330 |      |    | North America | United States | Enteritidis (Predicted) | Enteritidis | 1425  | 15886 |
| SAL_DA7169AA | FDA00000033               | SRR1292281 |      |    | North America | United States | Enteritidis (Predicted) | Enteritidis | 1425  | 15865 |
| SAL_DA7175AA | FDA00000037               | SRR1292275 |      |    | North America | United States | Enteritidis (Predicted) | Enteritidis | 1425  | 15859 |
| SAL_DA7186AA | FDA00000035               | SRR1292264 |      |    | North America | United States | Enteritidis (Predicted) | Enteritidis | 1425  | 15848 |
| SAL_DA7187AA | FDA00000034               | SRR1292263 |      |    | North America | United States | Enteritidis (Predicted) | Enteritidis | 1425  | 15847 |
| SAL_DA7246AA | MDH-2014-00801            | SRR1284731 | 2014 | 4  | North America | United States | Enteritidis             | Enteritidis | 1425  | 15795 |
| SAL_DA7249AA | MDH-2014-00799            | SRR1284716 | 2014 | 4  | North America | United States | Enteritidis             | Enteritidis | 1425  | 15792 |
| SAL_DA7330AA | NY-swgs1252               | SRR1272888 | 2014 | 3  | North America | United States | Enteritidis             | Enteritidis | 1425  | 15741 |
| SAL_DA7342AA | NY-swgs1250               | SRR1272866 | 2014 | 4  | North America | United States | Enteritidis             | Enteritidis | 7801  | 15729 |
| SAL_DA7344AA | NY-swgs1254               | SRR1272864 | 2014 | 4  | North America | United States | Enteritidis             | Enteritidis | 1425  | 3809  |
| SAL_DA7352AA | WAPHL-SAL-A00376          | SRR1272853 | 2003 |    | North America | United States | Enteritidis             | Enteritidis | 1425  | 15720 |
| SAL_DA7368AA | NY-swgs1255               | SRR1272790 | 2014 | 4  | North America | United States | Enteritidis             | Enteritidis | 1425  | 15704 |
| SAL_DA7384AA | MDH-2014-00797            | SRR1272538 | 2014 | 4  | North America | United States | Enteritidis             | Enteritidis | 1425  | 15690 |
| SAL_DA7395AA | MDH-2014-00795            | SRR1272518 | 2014 | 4  | North America | United States | Enteritidis             | Enteritidis | 1425  | 14319 |
| SAL_DA7396AA | NY-swgs1251               | SRR1272516 | 2014 | 4  | North America | United States | Enteritidis             | Enteritidis | 27443 | 15680 |
| SAL_DA7397AA | NY_BAC0900005400-1        | SRR1272515 | 2009 | 11 | North America | United States | Enteritidis             | Enteritidis | 1425  | 2514  |
| SAL_DA7398AA | NY-swgs1256               | SRR1272514 | 2014 | 4  | North America | United States | Enteritidis             | Enteritidis | 1425  | 15679 |
| SAL_DA7405AA | MDH-2014-00796            | SRR1272502 | 2014 | 4  | North America | United States | Enteritidis             | Enteritidis | 1425  | 15673 |
| SAL_DA7413AA | VA_WGS-00196              | SRR1272492 | 2011 | 10 | North America | United States | Enteritidis             | Enteritidis | 1425  | 15666 |
| SAL_DA7420AA | NY-swgs1253               | SRR1272476 | 2014 | 4  | North America | United States | Enteritidis             | Enteritidis | 1425  | 15660 |
| SAL_DA7423AA | D3063                     | ERR037597  |      |    |               |               | Enteritidis (Predicted) | Enteritidis | 1424  | 15658 |
| SAL_DA7424AA | A3582                     | ERR037599  |      |    |               |               | Enteritidis             | Enteritidis | 1425  | 15657 |
| SAL_DA7425AA | D3314                     | ERR037600  |      |    |               |               | Enteritidis             | Enteritidis | 1424  | 15656 |
| SAL_DA7426AA | D1374                     | ERR037601  |      |    |               |               | Enteritidis             | Enteritidis | 1424  | 15655 |
| SAL_DA7427AA | A9395                     | ERR037602  |      |    |               |               | Enteritidis (Predicted) | Enteritidis | 1424  | 15654 |
| SAL_DA7428AA | D10599                    | ERR037603  |      |    |               |               | Enteritidis (Predicted) | Enteritidis | 1424  | 15653 |
| SAL_DA7429AA | D7795                     | ERR037604  |      |    |               |               |                         | Enteritidis | -2006 | 15652 |
| SAL_DA7430AA | D3098                     | ERR037605  |      |    |               |               | Enteritidis (Predicted) | Enteritidis | 1424  | 15651 |
| SAL_DA7431AA | D3493                     | ERR037606  |      |    |               |               | Enteritidis (Predicted) | Enteritidis | 1424  | 15650 |
| SAL_DA7433AA | A2331                     | ERR037608  |      |    |               |               | Enteritidis (Predicted) | Enteritidis | 1424  | 15648 |
| SAL_DA7434AA | A850                      | ERR037609  |      |    |               |               | Enteritidis             | Enteritidis | 1424  | 15647 |
| SAL_DA7446AA | Q71AS-sc-2011-05-05T14:42 | ERR037596  |      |    |               |               | Typhimurium             | Enteritidis | 1424  | 15638 |
| SAL_DA7447AA | A38441-sc-2011-03-02-1044 | ERR037559  |      |    |               |               | Enteritidis (Predicted) | Enteritidis | -1931 | 15637 |
| SAL_DA7448AA | D36956-sc-2011-03-07-1045 | ERR037560  |      |    |               |               | Enteritidis (Predicted) | Enteritidis | 1424  | 15636 |
| SAL_DA7449AA | D25809-sc-2011-03-07-1045 | ERR037561  |      |    |               |               | Enteritidis (Predicted) | Enteritidis | 1425  | 15635 |

|              |                           |            |      |   |               |               |  |                         |             |      |       |
|--------------|---------------------------|------------|------|---|---------------|---------------|--|-------------------------|-------------|------|-------|
| SAL_DA7451AA | D23145-sc-2011-03-31T14:0 | ERR037563  |      |   |               |               |  | Enteritidis             | Enteritidis | 1424 | 15633 |
| SAL_DA7452AA | D40290-sc-2011-03-31T14:0 | ERR037564  |      |   |               |               |  | Enteritidis             | Enteritidis | 1424 | 15632 |
| SAL_DA7454AA | D35807-sc-2011-03-31T14:0 | ERR037566  |      |   |               |               |  | Enteritidis             | Enteritidis | 7874 | 15630 |
| SAL_DA7456AA | A39243-sc-2011-03-07-1044 | ERR037568  |      |   |               |               |  | Enteritidis (Predicted) | Enteritidis | 1425 | 15629 |
| SAL_DA7457AA | A39959-sc-2011-03-07-1045 | ERR037569  |      |   |               |               |  | Enteritidis (Predicted) | Enteritidis | 1425 | 15628 |
| SAL_DA7458AA | D36263-sc-2011-03-07-1045 | ERR037570  |      |   |               |               |  | Enteritidis (Predicted) | Enteritidis | 1424 | 15627 |
| SAL_DA7466AA | D23974-sc-2011-03-07-1045 | ERR037579  |      |   |               |               |  | Enteritidis (Predicted) | Enteritidis | 3745 | 15622 |
| SAL_DA7467AA | D24443-sc-2011-03-07-1046 | ERR037580  |      |   |               |               |  | Enteritidis (Predicted) | Enteritidis | 1424 | 15621 |
| SAL_DA7502AA | MDH-2014-00794            | SRR1269368 | 2014 | 4 | North America | United States |  | Enteritidis             | Enteritidis | 1425 | 15595 |
| SAL_DA7513AA | MDH-2014-00793            | SRR1269352 | 2014 | 4 | North America | United States |  | Enteritidis             | Enteritidis | 1425 | 15584 |
| SAL_DA7802AA | MDH-2014-00791            | SRR1264970 | 2014 | 4 | North America | United States |  | Enteritidis             | Enteritidis | 1425 | 15388 |
| SAL_DA7821AA | MDH-2014-00792            | SRR1264941 | 2014 | 4 | North America | United States |  | Enteritidis             | Enteritidis | 1425 | 15370 |
| SAL_DA7834AA | NY-swgs1249               | SRR1263931 | 2014 | 3 | North America | United States |  | Enteritidis             | Enteritidis | 1425 | 15357 |
| SAL_DA7835AA | NY-swgs1248               | SRR1263930 | 2014 | 3 | North America | United States |  | Enteritidis             | Enteritidis | 1425 | 15071 |
| SAL_DA7859AA | MDH-2014-00790            | SRR1263425 | 2014 | 4 | North America | United States |  | Enteritidis             | Enteritidis | 1425 | 15336 |
| SAL_DA7866AA | MDH-2014-00789            | SRR1263418 | 2014 | 4 | North America | United States |  | Enteritidis             | Enteritidis | 1425 | 15331 |
| SAL_DA7968AA | NY-swgs1234               | SRR1258655 | 2014 | 3 | North America | United States |  | Enteritidis             | Enteritidis | 1425 | 15230 |
| SAL_DA7972AA | VA_WGS-00190              | SRR1258650 | 2009 | 7 | North America | United States |  | Enteritidis             | Enteritidis | 1425 | 15226 |
| SAL_DA7978AA | NY-swgs1229               | SRR1258631 | 2014 | 2 | North America | United States |  | Enteritidis             | Enteritidis | 1425 | 15220 |
| SAL_DA7981AA | MDH-2014-00786            | SRR1258628 | 2014 | 4 | North America | United States |  | Enteritidis             | Enteritidis | 1425 | 15217 |
| SAL_DA7991AA | MDH-2014-00788            | SRR1258613 | 2014 | 4 | North America | United States |  | Enteritidis             | Enteritidis | 1425 | 15207 |
| SAL_DA7992AA | NY-swgs1230               | SRR1258612 | 2014 | 2 | North America | United States |  | Enteritidis             | Enteritidis | 1425 | 15206 |
| SAL_DA8002AA | MDH-2014-00787            | SRR1258600 | 2014 | 4 | North America | United States |  | Enteritidis             | Enteritidis | 1425 | 15197 |
| SAL_DA8008AA | MDH-2014-00785            | SRR1258592 | 2014 | 4 | North America | United States |  | Enteritidis             | Enteritidis | 1425 | 2067  |
| SAL_DA8010AA | NY-swgs1235               | SRR1258588 | 2014 | 3 | North America | United States |  | Enteritidis             | Enteritidis | 1425 | 15191 |
| SAL_DA8014AA | MDH-2014-00784            | SRR1258584 | 2014 | 4 | North America | United States |  | Enteritidis             | Enteritidis | 1425 | 15187 |
| SAL_DA8016AA | NY-swgs1233               | SRR1258582 | 2014 | 1 | North America | United States |  | Enteritidis             | Enteritidis | 1425 | 15185 |
| SAL_DA8017AA | MDH-2014-00128            | SRR1258581 | 2006 | 2 | North America | United States |  | Enteritidis             | Enteritidis | 1425 | 15184 |
| SAL_DA8025AA | FSW0122                   | SRR1258572 | 2013 | 5 | Asia          | Pakistan      |  | Enteritidis             | Enteritidis | 1425 | 15176 |
| SAL_DA8047AA | MDH-2014-00782            | SRR1257318 | 2014 | 4 | North America | United States |  | Enteritidis             | Enteritidis | 1425 | 15156 |
| SAL_DA8060AA | MDH-2014-00783            | SRR1257305 | 2014 | 4 | North America | United States |  | Enteritidis             | Enteritidis | 1425 | 15146 |
| SAL_DA8071AA | FSW0107                   | SRR1257292 | 2013 | 2 | Asia          | Indonesia     |  | Enteritidis (Predicted) | Enteritidis | 1425 | 15136 |
| SAL_DA8132AA | MDH-2014-00143            | SRR1248810 | 2006 | 6 | North America | United States |  | Enteritidis             | Enteritidis | 1425 | 15078 |
| SAL_DA8136AA | FAR0085                   | SRR1248786 | 2011 | 8 | Asia          | Pakistan      |  | Enteritidis             | Enteritidis | 3888 | 15074 |
| SAL_DA8140AA | MDH-2014-00779            | SRR1238797 | 2014 | 3 |               |               |  | Enteritidis             | Enteritidis | 1425 | 2067  |
| SAL_DA8141AA | NY-swgs1247               | SRR1238796 | 2014 | 3 | North America | United States |  | Enteritidis             | Enteritidis | 1425 | 15071 |
| SAL_DA8151AA | NY-swgs1246               | SRR1238786 | 2014 | 3 |               |               |  | Enteritidis             | Enteritidis | 1425 | 15064 |
| SAL_DA8152AA | NY-swgs1244               | SRR1238785 | 2014 | 3 | North America | United States |  | Enteritidis             | Enteritidis | 1425 | 15038 |
| SAL_DA8160AA | MDH-2014-00780            | SRR1238776 | 2014 | 3 |               |               |  | Enteritidis             | Enteritidis | 1425 | 15057 |
| SAL_DA8170AA | NY-swgs1243               | SRR1238766 | 2014 | 3 | North America | United States |  | Enteritidis             | Enteritidis | 1425 | 15052 |
| SAL_DA8181AA | MDH-2014-00781            | SRR1238753 | 2014 | 4 |               |               |  | Enteritidis             | Enteritidis | 1425 | 15043 |
| SAL_DA8187AA | NY-swgs1245               | SRR1238742 | 2014 | 3 | North America | United States |  | Enteritidis             | Enteritidis | 1425 | 15038 |
| SAL_DA8351AA | Q23F1                     | ERR028261  | 2002 |   | Africa        | Malawi        |  | Enteritidis (Predicted) | Enteritidis | 1425 | 14852 |
| SAL_DA8358AA | Q255F2_U                  | ERR028268  | 2002 |   | Africa        | Malawi        |  | Enteritidis (Predicted) | Enteritidis | 1424 | 14879 |
| SAL_DA8388AA | Q23F2_BM                  | ERR028251  | 2002 |   | Africa        | Malawi        |  | Enteritidis (Predicted) | Enteritidis | 1425 | 14852 |
| SAL_DA8390AA | Q23A                      | ERR028253  | 2002 |   | Africa        | Malawi        |  | Enteritidis (Predicted) | Enteritidis | 1425 | 14852 |
| SAL_DA8404AA | NY-swgs1236               | SRR1233951 | 2014 | 3 |               |               |  | Enteritidis             | Enteritidis | 1425 | 14838 |
| SAL_DA8426AA | MDH-2014-00778            | SRR1233929 | 2014 | 3 | North America | United States |  | Enteritidis             | Enteritidis | 1425 | 14816 |
| SAL_DA8450AA | swgs1200                  | SRR1220816 | 2014 | 1 | North America | United States |  | Enteritidis             | Enteritidis | 1425 | 14326 |
| SAL_DA8451AA | swgs1211                  | SRR1220812 | 2014 | 1 | North America | United States |  | Enteritidis             | Enteritidis | 1425 | 14798 |
| SAL_DA8456AA | WAPHL-SAL-A00328          | SRR1220800 | 2002 |   | North America | United States |  | Enteritidis             | Enteritidis | 3801 | 14794 |
| SAL_DA8461AA | NY-swgs1240               | SRR1220788 | 2014 | 3 | North America | United States |  | Enteritidis             | Enteritidis | 1425 | 14789 |
| SAL_DA8466AA | NY-swgs1239               | SRR1220773 | 2014 | 3 | North America | United States |  | Enteritidis             | Enteritidis | 1425 | 14787 |
| SAL_DA8467AA | swgs1201                  | SRR1220771 | 2014 | 1 | North America | United States |  | Enteritidis             | Enteritidis | 1425 | 14786 |
| SAL_DA8470AA | NY-swgs1242               | SRR1220760 | 2014 | 3 | North America | United States |  | Enteritidis             | Enteritidis | 1425 | 14783 |
| SAL_DA8472AA | NY-swgs1241               | SRR1220754 | 2014 | 3 | North America | United States |  | Enteritidis             | Enteritidis | 1425 | 14781 |
| SAL_DA8475AA | NY-swgs1238               | SRR1220747 | 2014 | 3 | North America | United States |  | Enteritidis             | Enteritidis | 1425 | 14778 |
| SAL_DA8477AA | WAPHL-SAL-A00324          | SRR1220744 | 2002 |   | North America | United States |  | Enteritidis             | Enteritidis | 1425 | 14776 |
| SAL_DA8482AA | WAPHL-SAL-A00335          | SRR1220732 | 2002 |   | North America | United States |  | Enteritidis             | Enteritidis | 1425 | 14771 |

|              |                  |            |      |    |               |               |                         |             |       |       |
|--------------|------------------|------------|------|----|---------------|---------------|-------------------------|-------------|-------|-------|
| SAL_DA8485AA | WAPHL-SAL-A00336 | SRR1220722 | 2002 |    | North America | United States | Enteritidis             | Enteritidis | 1425  | 14768 |
| SAL_DA8489AA | WAPHL-SAL-A00323 | SRR1220713 | 2002 |    | North America | United States | Enteritidis             | Enteritidis | 1425  | 14765 |
| SAL_DA8545AA | FSE0057          | SRR1212344 | 2011 | 7  | North America | United States | Enteritidis             | Enteritidis | 1425  | 14716 |
| SAL_DA8571AA | FSE0083          | SRR1212298 | 2010 | 6  | North America | United States | Enteritidis (Predicted) | Enteritidis | 1425  | 14692 |
| SAL_DA8602AA | VA_WGS-00029     | SRR1207551 | 2005 | 10 | North America | United States | Enteritidis             | Enteritidis | 1425  | 14663 |
| SAL_DA8609AA | VA_WGS-00032     | SRR1207515 | 2006 | 3  | North America | United States | Enteritidis             | Enteritidis | 1425  | 14656 |
| SAL_DA8620AA | VA_WGS-00033     | SRR1207483 | 2006 | 5  | North America | United States | Enteritidis             | Enteritidis | 1425  | 14637 |
| SAL_DA8627AA | VA_WGS-00030     | SRR1207468 | 2005 | 11 | North America | United States | Enteritidis             | Enteritidis | 1425  | 14640 |
| SAL_DA8630AA | VA_WGS-00028     | SRR1207461 | 2005 | 10 | North America | United States | Enteritidis             | Enteritidis | 1425  | 14637 |
| SAL_DA8631AA | VA_WGS-00027     | SRR1207460 | 2005 | 9  | North America | United States | Enteritidis             | Enteritidis | 1425  | 14636 |
| SAL_DA8638AA | VA_WGS-00031     | SRR1207440 | 2005 | 12 | North America | United States | Enteritidis             | Enteritidis | 1425  | 14629 |
| SAL_DA8640AA | CFSAN004342      | SRR1206205 | 2013 | 4  | North America | United States | Enteritidis             | Enteritidis | 1425  | 14627 |
| SAL_DA8676AA | swgs1228         | SRR1203004 | 2014 | 2  | North America | United States | Enteritidis             | Enteritidis | 1425  | 10271 |
| SAL_DA8677AA | swgs1227         | SRR1203003 | 2014 | 2  | North America | United States | Enteritidis             | Enteritidis | 1425  | 14594 |
| SAL_DA8696AA | AZ_TG71151       | SRR1201356 | 2013 | 7  | North America | United States | Enteritidis             | Enteritidis | 27732 | 14579 |
| SAL_DA8758AA | swgs1223         | SRR1198974 | 2014 | 2  | North America | United States | Enteritidis             | Enteritidis | 8003  | 12492 |
| SAL_DA8795AA | swgs1226         | SRR1198920 | 2014 | 2  | North America | United States | Enteritidis             | Enteritidis | 8003  | 12492 |
| SAL_DA8796AA | swgs1224         | SRR1198919 | 2014 | 2  | North America | United States | Enteritidis             | Enteritidis | 8003  | 14494 |
| SAL_DA8819AA | swgs1225         | SRR1198886 | 2014 | 2  | North America | United States | Enteritidis             | Enteritidis | 1425  | 14477 |
| SAL_DA8852AA | AZ_TG71143       | SRR1195697 | 2013 | 7  | North America | United States | Enteritidis             | Enteritidis | 1425  | 14445 |
| SAL_DA8900AA | swgs1074         | SRR1187617 | 2013 | 12 | North America | United States | Enteritidis             | Enteritidis | 1425  | 14360 |
| SAL_DA8901AA | swgs1213         | SRR1187615 | 2014 | 1  | North America | United States | Enteritidis             | Enteritidis | 1425  | 14402 |
| SAL_DA8902AA | swgs1085         | SRR1187614 | 2011 | 2  | North America | United States | Enteritidis             | Enteritidis | 1425  | 14401 |
| SAL_DA8903AA | swgs1047         | SRR1187612 | 2013 | 11 | North America | United States | Enteritidis             | Enteritidis | 1425  | 2668  |
| SAL_DA8904AA | swgs1057         | SRR1187611 | 2013 | 11 | North America | United States | Enteritidis             | Enteritidis | 1425  | 14322 |
| SAL_DA8905AA | swgs1034         | SRR1187610 | 2013 | 10 | North America | United States | Enteritidis             | Enteritidis | 1425  | 14400 |
| SAL_DA8906AA | swgs1023         | SRR1187609 | 2013 | 10 | North America | United States | Enteritidis             | Enteritidis | 3888  | 14399 |
| SAL_DA8907AA | swgs1046         | SRR1187608 | 2013 | 10 | North America | United States | Enteritidis             | Enteritidis | 1425  | 14388 |
| SAL_DA8908AA | swgs1089         | SRR1187607 | 2013 | 12 | North America | United States | Enteritidis             | Enteritidis | 1425  | 14398 |
| SAL_DA8909AA | swgs1081         | SRR1187606 | 2013 | 12 | North America | United States | Enteritidis             | Enteritidis | 1425  | 14397 |
| SAL_DA8910AA | swgs1031         | SRR1187605 | 2013 | 10 | North America | United States | Enteritidis             | Enteritidis | 1425  | 14396 |
| SAL_DA8911AA | swgs1198         | SRR1187604 | 2014 | 1  | North America | United States | Enteritidis             | Enteritidis | 1425  | 14395 |
| SAL_DA8912AA | swgs1084         | SRR1187603 | 2008 | 10 | North America | United States | Enteritidis             | Enteritidis | 1425  | 14394 |
| SAL_DA8913AA | swgs1028         | SRR1187602 | 2013 | 10 | North America | United States | Enteritidis             | Enteritidis | 1425  | 14393 |
| SAL_DA8914AA | swgs1059         | SRR1187601 | 2013 | 11 | North America | United States | Enteritidis             | Enteritidis | 1425  | 5730  |
| SAL_DA8915AA | swgs1040         | SRR1187600 | 2013 | 11 | North America | United States | Enteritidis             | Enteritidis | 1425  | 2067  |
| SAL_DA8916AA | swgs1026         | SRR1187599 | 2013 | 9  | North America | United States | Enteritidis             | Enteritidis | 1425  | 14392 |
| SAL_DA8917AA | swgs1214         | SRR1187597 | 2014 | 2  | North America | United States | Enteritidis             | Enteritidis | 1425  | 14391 |
| SAL_DA8918AA | swgs1194         | SRR1187596 | 2013 | 12 | North America | United States | Enteritidis             | Enteritidis | 1425  | 14390 |
| SAL_DA8919AA | swgs1049         | SRR1187595 | 2013 | 11 | North America | United States | Enteritidis             | Enteritidis | 1425  | 14389 |
| SAL_DA8920AA | swgs1025         | SRR1187594 | 2013 | 10 | North America | United States | Enteritidis             | Enteritidis | 1425  | 14388 |
| SAL_DA8921AA | swgs1054         | SRR1187593 | 2013 | 11 | North America | United States | Enteritidis             | Enteritidis | 1425  | 14319 |
| SAL_DA8922AA | swgs1017         | SRR1187592 | 2013 | 10 | North America | United States | Enteritidis             | Enteritidis | 1425  | 14322 |
| SAL_DA8923AA | swgs1053         | SRR1187591 | 2013 | 11 | North America | United States | Enteritidis             | Enteritidis | 27443 | 14387 |
| SAL_DA8924AA | swgs1037         | SRR1187590 | 2013 | 10 | North America | United States | Enteritidis             | Enteritidis | 1425  | 14386 |
| SAL_DA8925AA | swgs1070         | SRR1187588 | 2013 | 12 | North America | United States | Enteritidis             | Enteritidis | 1425  | 14385 |
| SAL_DA8926AA | swgs1051         | SRR1187586 | 2013 | 11 | North America | United States | Enteritidis             | Enteritidis | 1425  | 14323 |
| SAL_DA8927AA | swgs1032         | SRR1187585 | 2013 | 10 | North America | United States | Enteritidis             | Enteritidis | 1425  | 14384 |
| SAL_DA8928AA | swgs1094         | SRR1187583 | 2013 | 12 | North America | United States | Enteritidis             | Enteritidis | 1425  | 14383 |
| SAL_DA8929AA | swgs1038         | SRR1187582 | 2013 | 10 | North America | United States | Enteritidis             | Enteritidis | 1425  | 14382 |
| SAL_DA8930AA | swgs1068         | SRR1187581 | 2013 | 12 | North America | United States | Enteritidis             | Enteritidis | 1425  | 14360 |
| SAL_DA8931AA | swgs1197         | SRR1187580 | 2014 | 1  | North America | United States | Enteritidis             | Enteritidis | 1425  | 14381 |
| SAL_DA8932AA | swgs1067         | SRR1187579 | 2013 | 12 | North America | United States | Enteritidis             | Enteritidis | 1425  | 2067  |
| SAL_DA8933AA | swgs1035         | SRR1187578 | 2013 | 10 | North America | United States | Enteritidis             | Enteritidis | 1425  | 4170  |
| SAL_DA8934AA | swgs1024         | SRR1187577 | 2013 | 9  | North America | United States | Enteritidis             | Enteritidis | 1425  | 14380 |
| SAL_DA8935AA | swgs1222         | SRR1187575 | 2014 | 2  | North America | United States | Enteritidis             | Enteritidis | 1425  | 14379 |
| SAL_DA8936AA | swgs1045         | SRR1187574 | 2013 | 11 | North America | United States | Enteritidis             | Enteritidis | 1425  | 14376 |
| SAL_DA8937AA | swgs1039         | SRR1187573 | 2013 | 11 | North America | United States | Enteritidis             | Enteritidis | 1425  | 14378 |
| SAL_DA8938AA | swgs1030         | SRR1187572 | 2013 | 10 | North America | United States | Enteritidis             | Enteritidis | 8384  | 14377 |



|              |          |            |      |    |               |               |             |             |       |       |
|--------------|----------|------------|------|----|---------------|---------------|-------------|-------------|-------|-------|
| SAL_DA8939AA | swgs1036 | SRR1187571 | 2013 | 10 | North America | United States | Enteritidis | Enteritidis | 1425  | 14376 |
| SAL_DA8940AA | swgs1022 | SRR1187570 | 2013 | 9  | North America | United States | Enteritidis | Enteritidis | 1425  | 14375 |
| SAL_DA8941AA | swgs1195 | SRR1187569 | 2013 | 12 | North America | United States | Enteritidis | Enteritidis | 1425  | 14374 |
| SAL_DA8942AA | swgs1066 | SRR1187568 | 2013 | 11 | North America | United States | Enteritidis | Enteritidis | 1425  | 14373 |
| SAL_DA8943AA | swgs1019 | SRR1187567 | 2013 | 2  | North America | United States | Enteritidis | Enteritidis | 1425  | 14372 |
| SAL_DA8944AA | swgs1208 | SRR1187459 | 2014 | 1  | North America | United States | Enteritidis | Enteritidis | 1425  | 14371 |
| SAL_DA8945AA | swgs1080 | SRR1187458 | 2013 | 12 | North America | United States | Enteritidis | Enteritidis | 1425  | 14370 |
| SAL_DA8946AA | swgs1056 | SRR1187457 | 2013 | 11 | North America | United States | Enteritidis | Enteritidis | 1425  | 14369 |
| SAL_DA8947AA | swgs1203 | SRR1187456 | 2014 | 1  | North America | United States | Enteritidis | Enteritidis | 26756 | 14368 |
| SAL_DA8948AA | swgs1210 | SRR1187455 | 2014 | 1  | North America | United States | Enteritidis | Enteritidis | 1425  | 14367 |
| SAL_DA8949AA | swgs1082 | SRR1187454 | 2013 | 12 | North America | United States | Enteritidis | Enteritidis | 1425  | 14366 |
| SAL_DA8950AA | swgs1042 | SRR1187453 | 2013 | 11 | North America | United States | Enteritidis | Enteritidis | 1425  | 14365 |
| SAL_DA8951AA | swgs1095 | SRR1187452 | 2013 | 12 | North America | United States | Enteritidis | Enteritidis | 1425  | 14364 |
| SAL_DA8952AA | swgs1072 | SRR1187451 | 2013 | 12 | North America | United States | Enteritidis | Enteritidis | 1425  | 14362 |
| SAL_DA8953AA | swgs1063 | SRR1187450 | 2013 | 11 | North America | United States | Enteritidis | Enteritidis | 1425  | 14363 |
| SAL_DA8954AA | swgs1071 | SRR1187449 | 2013 | 12 | North America | United States | Enteritidis | Enteritidis | 1425  | 14362 |
| SAL_DA8955AA | swgs1021 | SRR1187448 | 2013 | 9  | North America | United States | Enteritidis | Enteritidis | 1425  | 14345 |
| SAL_DA8956AA | swgs1204 | SRR1187447 | 2014 | 1  | North America | United States | Enteritidis | Enteritidis | 1425  | 14361 |
| SAL_DA8957AA | swgs1073 | SRR1187446 | 2013 | 12 | North America | United States | Enteritidis | Enteritidis | 1425  | 14360 |
| SAL_DA8958AA | swgs1064 | SRR1187444 | 2013 | 11 | North America | United States | Enteritidis | Enteritidis | 1425  | 14359 |
| SAL_DA8959AA | swgs1044 | SRR1187443 | 2013 | 11 | North America | United States | Enteritidis | Enteritidis | 1425  | 14358 |
| SAL_DA8960AA | swgs1033 | SRR1187441 | 2013 | 10 | North America | United States | Enteritidis | Enteritidis | 1425  | 14357 |
| SAL_DA8961AA | swgs1206 | SRR1187439 | 2014 | 1  | North America | United States | Enteritidis | Enteritidis | 1425  | 14356 |
| SAL_DA8962AA | swgs1069 | SRR1187438 | 2013 | 12 | North America | United States | Enteritidis | Enteritidis | 1425  | 14355 |
| SAL_DA8963AA | swgs1215 | SRR1187437 | 2014 | 1  | North America | United States | Enteritidis | Enteritidis | 1425  | 14354 |
| SAL_DA8964AA | swgs1060 | SRR1187436 | 2013 | 11 | North America | United States | Enteritidis | Enteritidis | 1425  | 14353 |
| SAL_DA8965AA | swgs1050 | SRR1187435 | 2013 | 11 | North America | United States | Enteritidis | Enteritidis | 1425  | 14352 |
| SAL_DA8966AA | swgs1207 | SRR1187434 | 2014 | 1  | North America | United States | Enteritidis | Enteritidis | 1425  | 14351 |
| SAL_DA8967AA | swgs1077 | SRR1187433 | 2013 | 12 | North America | United States | Enteritidis | Enteritidis | 1425  | 14350 |
| SAL_DA8968AA | swgs1041 | SRR1187432 | 2013 | 11 | North America | United States | Enteritidis | Enteritidis | 1425  | 2668  |
| SAL_DA8969AA | swgs1083 | SRR1187431 | 2006 | 11 | North America | United States | Enteritidis | Enteritidis | 1425  | 14349 |
| SAL_DA8970AA | swgs1076 | SRR1187430 | 2013 | 12 | North America | United States | Enteritidis | Enteritidis | 1425  | 14348 |
| SAL_DA8971AA | swgs1065 | SRR1187429 | 2013 | 11 | North America | United States | Enteritidis | Enteritidis | 1425  | 14347 |
| SAL_DA8972AA | swgs1020 | SRR1187428 | 2013 | 2  | North America | United States | Enteritidis | Enteritidis | 1425  | 14346 |
| SAL_DA8973AA | swgs1088 | SRR1187426 | 2013 | 12 | North America | United States | Enteritidis | Enteritidis | 1425  | 14345 |
| SAL_DA8974AA | swgs1209 | SRR1187424 | 2014 | 1  | North America | United States | Enteritidis | Enteritidis | 1425  | 14344 |
| SAL_DA8975AA | swgs1062 | SRR1187422 | 2013 | 11 | North America | United States | Enteritidis | Enteritidis | 1425  | 14343 |
| SAL_DA8976AA | swgs1052 | SRR1187421 | 2013 | 11 | North America | United States | Enteritidis | Enteritidis | 1425  | 14342 |
| SAL_DA8977AA | swgs1091 | SRR1187419 | 2013 | 12 | North America | United States | Enteritidis | Enteritidis | 1425  | 14341 |
| SAL_DA8978AA | swgs1086 | SRR1187418 | 2013 | 12 | North America | United States | Enteritidis | Enteritidis | 1425  | 14340 |
| SAL_DA8979AA | swgs1079 | SRR1187417 | 2013 | 12 | North America | United States | Enteritidis | Enteritidis | 8003  | 12492 |
| SAL_DA8980AA | swgs1218 | SRR1187416 | 2014 | 2  | North America | United States | Enteritidis | Enteritidis | 1425  | 14339 |
| SAL_DA8981AA | swgs1078 | SRR1187415 | 2013 | 12 | North America | United States | Enteritidis | Enteritidis | 1425  | 14338 |
| SAL_DA8982AA | swgs1048 | SRR1187414 | 2013 | 11 | North America | United States | Enteritidis | Enteritidis | 1425  | 14322 |
| SAL_DA8983AA | swgs1029 | SRR1187411 | 2013 | 10 | North America | United States | Enteritidis | Enteritidis | 1425  | 14337 |
| SAL_DA8984AA | swgs1092 | SRR1187410 | 2013 | 12 | North America | United States | Enteritidis | Enteritidis | 1425  | 14336 |
| SAL_DA8985AA | swgs1058 | SRR1187409 | 2013 | 11 | North America | United States | Enteritidis | Enteritidis | 1425  | 14335 |
| SAL_DA8986AA | swgs1043 | SRR1187408 | 2013 | 11 | North America | United States | Enteritidis | Enteritidis | 1425  | 14323 |
| SAL_DA8987AA | swgs1217 | SRR1187407 | 2014 | 2  | North America | United States | Enteritidis | Enteritidis | 8003  | 14334 |
| SAL_DA8988AA | swgs1212 | SRR1187406 | 2014 | 1  | North America | United States | Enteritidis | Enteritidis | 1425  | 14333 |
| SAL_DA8989AA | swgs1205 | SRR1187405 | 2014 | 1  | North America | United States | Enteritidis | Enteritidis | 1425  | 14332 |
| SAL_DA8990AA | swgs1018 | SRR1187404 | 2013 | 10 | North America | United States | Enteritidis | Enteritidis | 8003  | 14331 |
| SAL_DA8991AA | swgs1220 | SRR1187397 | 2014 | 2  | North America | United States | Enteritidis | Enteritidis | 1425  | 14330 |
| SAL_DA8992AA | swgs1196 | SRR1187396 | 2013 | 12 | North America | United States | Enteritidis | Enteritidis | 1425  | 14329 |
| SAL_DA8993AA | swgs1027 | SRR1187395 | 2013 | 10 | North America | United States | Enteritidis | Enteritidis | 1425  | 14328 |
| SAL_DA8994AA | swgs1216 | SRR1187394 | 2014 | 2  | North America | United States | Enteritidis | Enteritidis | 1425  | 14327 |
| SAL_DA8995AA | swgs1093 | SRR1187392 | 2013 | 12 | North America | United States | Enteritidis | Enteritidis | 1425  | 14326 |
| SAL_DA8996AA | swgs1221 | SRR1187391 | 2014 | 2  | North America | United States | Enteritidis | Enteritidis | 1425  | 14325 |
| SAL_DA8997AA | swgs1090 | SRR1187390 | 2013 | 12 | North America | United States | Enteritidis | Enteritidis | 1425  | 14324 |

|              |                |            |      |    |               |               |             |             |       |       |
|--------------|----------------|------------|------|----|---------------|---------------|-------------|-------------|-------|-------|
| SAL_DA8998AA | swgs1087       | SRR1187389 | 2013 | 12 | North America | United States | Enteritidis | Enteritidis | 1425  | 14323 |
| SAL_DA8999AA | swgs1061       | SRR1187388 | 2013 | 11 | North America | United States | Enteritidis | Enteritidis | 1425  | 14322 |
| SAL_DA9000AA | swgs1219       | SRR1187387 | 2014 | 2  | North America | United States | Enteritidis | Enteritidis | 1425  | 14321 |
| SAL_DA9001AA | swgs1075       | SRR1187386 | 2013 | 12 | North America | United States | Enteritidis | Enteritidis | 1425  | 14320 |
| SAL_DA9002AA | swgs1055       | SRR1187385 | 2013 | 11 | North America | United States | Enteritidis | Enteritidis | 1425  | 14319 |
| SAL_DA9003AA | MDH-2014-00246 | SRR1188546 | 2012 | 7  | North America | United States | Enteritidis | Enteritidis | 1425  | 14318 |
| SAL_DA9004AA | MDH-2014-00227 | SRR1188545 | 2001 | 6  | North America | United States | Enteritidis | Enteritidis | 1425  | 14317 |
| SAL_DA9005AA | MDH-2014-00253 | SRR1188542 | 2003 | 12 | North America | United States | Enteritidis | Enteritidis | 1425  | 14316 |
| SAL_DA9008AA | MDH-2014-00208 | SRR1188539 | 2000 | 9  | North America | United States | Enteritidis | Enteritidis | 1425  | 14314 |
| SAL_DA9009AA | MDH-2014-00248 | SRR1188538 | 2013 | 6  | North America | United States | Enteritidis | Enteritidis | 1425  | 14313 |
| SAL_DA9010AA | MDH-2014-00217 | SRR1188537 | 2001 | 4  | North America | United States | Enteritidis | Enteritidis | 1425  | 14312 |
| SAL_DA9013AA | MDH-2014-00229 | SRR1188534 | 2001 | 7  | North America | United States | Enteritidis | Enteritidis | 1425  | 14309 |
| SAL_DA9014AA | MDH-2014-00223 | SRR1188533 | 2001 | 5  | North America | United States | Enteritidis | Enteritidis | 1425  | 14306 |
| SAL_DA9015AA | MDH-2014-00233 | SRR1188526 | 2001 | 12 | North America | United States | Enteritidis | Enteritidis | 1425  | 14308 |
| SAL_DA9016AA | MDH-2014-00212 | SRR1188525 | 2000 | 9  | North America | United States | Enteritidis | Enteritidis | 1425  | 14307 |
| SAL_DA9017AA | MDH-2014-00254 | SRR1188519 | 2003 | 11 | North America | United States | Enteritidis | Enteritidis | 1425  | 14267 |
| SAL_DA9018AA | MDH-2014-00228 | SRR1188518 | 2001 | 7  | North America | United States | Enteritidis | Enteritidis | 1425  | 14275 |
| SAL_DA9019AA | MDH-2014-00234 | SRR1188510 | 2003 | 11 | North America | United States | Enteritidis | Enteritidis | 1425  | 14267 |
| SAL_DA9020AA | MDH-2014-00222 | SRR1188509 | 2001 | 5  | North America | United States | Enteritidis | Enteritidis | 1425  | 14306 |
| SAL_DA9021AA | MDH-2014-00255 | SRR1188508 | 2014 | 1  | North America | United States | Enteritidis | Enteritidis | 1425  | 14259 |
| SAL_DA9022AA | MDH-2014-00209 | SRR1188507 | 2000 | 9  | North America | United States | Enteritidis | Enteritidis | 1425  | 14269 |
| SAL_DA9023AA | MDH-2014-00204 | SRR1188500 | 2000 | 7  | North America | United States | Enteritidis | Enteritidis | 1425  | 14305 |
| SAL_DA9024AA | MDH-2014-00226 | SRR1188494 | 2001 | 6  | North America | United States | Enteritidis | Enteritidis | 1425  | 14304 |
| SAL_DA9026AA | MDH-2014-00221 | SRR1188485 | 2001 | 5  | North America | United States | Enteritidis | Enteritidis | 1425  | 14302 |
| SAL_DA9027AA | MDH-2014-00218 | SRR1188484 | 2001 | 5  | North America | United States | Enteritidis | Enteritidis | 1425  | 14301 |
| SAL_DA9028AA | MDH-2014-00242 | SRR1188483 | 2011 | 9  | North America | United States | Enteritidis | Enteritidis | 1425  | 14300 |
| SAL_DA9029AA | MDH-2014-00219 | SRR1188482 | 2001 | 5  | North America | United States | Enteritidis | Enteritidis | 1425  | 14275 |
| SAL_DA9031AA | MDH-2014-00245 | SRR1188480 | 2012 | 6  | North America | United States | Enteritidis | Enteritidis | 1425  | 14298 |
| SAL_DA9032AA | MDH-2014-00241 | SRR1188478 | 2011 | 9  | North America | United States | Enteritidis | Enteritidis | 1425  | 14297 |
| SAL_DA9033AA | MDH-2014-00207 | SRR1188477 | 2000 | 8  | North America | United States | Enteritidis | Enteritidis | 1425  | 14296 |
| SAL_DA9034AA | MDH-2014-00206 | SRR1188476 | 2000 | 8  | North America | United States | Enteritidis | Enteritidis | 1425  | 14295 |
| SAL_DA9036AA | MDH-2014-00213 | SRR1188474 | 2000 | 9  | North America | United States | Enteritidis | Enteritidis | 1425  | 14293 |
| SAL_DA9038AA | MDH-2014-00235 | SRR1188472 | 2005 | 9  | North America | United States | Enteritidis | Enteritidis | 1425  | 14291 |
| SAL_DA9039AA | MDH-2014-00210 | SRR1188471 | 2000 | 9  | North America | United States | Enteritidis | Enteritidis | 1425  | 14290 |
| SAL_DA9040AA | MDH-2014-00203 | SRR1188470 | 2000 | 7  | North America | United States | Enteritidis | Enteritidis | 1425  | 14289 |
| SAL_DA9042AA | MDH-2014-00236 | SRR1188468 | 2011 | 5  | North America | United States | Enteritidis | Enteritidis | 1425  | 14287 |
| SAL_DA9043AA | MDH-2014-00230 | SRR1188467 | 2001 | 7  | North America | United States | Enteritidis | Enteritidis | 1425  | 14286 |
| SAL_DA9044AA | MDH-2014-00249 | SRR1188466 | 2014 | 1  | North America | United States | Enteritidis | Enteritidis | 1425  | 14285 |
| SAL_DA9045AA | MDH-2014-00202 | SRR1188465 | 2000 | 6  | North America | United States | Enteritidis | Enteritidis | 1425  | 14284 |
| SAL_DA9046AA | MDH-2014-00247 | SRR1188464 | 2012 | 7  | North America | United States | Enteritidis | Enteritidis | 1425  | 14283 |
| SAL_DA9047AA | MDH-2014-00237 | SRR1188463 | 2011 | 6  | North America | United States | Enteritidis | Enteritidis | 1425  | 14282 |
| SAL_DA9048AA | MDH-2014-00244 | SRR1188462 | 2011 | 10 | North America | United States | Enteritidis | Enteritidis | 1425  | 14281 |
| SAL_DA9049AA | MDH-2014-00220 | SRR1188461 | 2001 | 5  | North America | United States | Enteritidis | Enteritidis | 1425  | 14275 |
| SAL_DA9051AA | MDH-2014-00214 | SRR1188458 | 2001 | 3  | North America | United States | Enteritidis | Enteritidis | 26543 | 14279 |
| SAL_DA9053AA | MDH-2014-00250 | SRR1188456 | 2014 | 1  | North America | United States | Enteritidis | Enteritidis | 1425  | 14277 |
| SAL_DA9054AA | MDH-2014-00240 | SRR1188455 | 2011 | 8  | North America | United States | Enteritidis | Enteritidis | 1425  | 14276 |
| SAL_DA9055AA | MDH-2014-00225 | SRR1188454 | 2001 | 6  | North America | United States | Enteritidis | Enteritidis | 1425  | 14275 |
| SAL_DA9056AA | MDH-2014-00215 | SRR1188453 | 2001 | 4  | North America | United States | Enteritidis | Enteritidis | 1425  | 14274 |
| SAL_DA9057AA | MDH-2014-00205 | SRR1188452 | 2000 | 8  | North America | United States | Enteritidis | Enteritidis | 1425  | 14273 |
| SAL_DA9062AA | MDH-2014-00211 | SRR1188445 | 2000 | 9  | North America | United States | Enteritidis | Enteritidis | 1425  | 14269 |
| SAL_DA9064AA | MDH-2014-00252 | SRR1188443 | 2003 | 11 | North America | United States | Enteritidis | Enteritidis | 1425  | 14267 |
| SAL_DA9065AA | MDH-2014-00216 | SRR1188442 | 2001 | 4  | North America | United States | Enteritidis | Enteritidis | 1425  | 14266 |
| SAL_DA9066AA | MDH-2014-00238 | SRR1188441 | 2011 | 8  | North America | United States | Enteritidis | Enteritidis | 1425  | 14265 |
| SAL_DA9067AA | MDH-2014-00231 | SRR1188440 | 2001 | 6  | North America | United States | Enteritidis | Enteritidis | 1425  | 14264 |
| SAL_DA9068AA | MDH-2014-00232 | SRR1188438 | 2001 | 10 | North America | United States | Enteritidis | Enteritidis | 1425  | 14263 |
| SAL_DA9070AA | MDH-2014-00251 | SRR1188436 | 2001 | 7  | North America | United States | Enteritidis | Enteritidis | 1425  | 14261 |
| SAL_DA9071AA | MDH-2014-00243 | SRR1188435 | 2011 | 10 | North America | United States | Enteritidis | Enteritidis | 1425  | 14260 |
| SAL_DA9072AA | MDH-2014-00256 | SRR1188434 | 2014 | 2  | North America | United States | Enteritidis | Enteritidis | 1425  | 14259 |
| SAL_DA9073AA | MDH-2014-00239 | SRR1188433 | 2011 | 8  | North America | United States | Enteritidis | Enteritidis | 1425  | 14258 |

|              |                  |               |      |   |               |               |                         |             |       |       |
|--------------|------------------|---------------|------|---|---------------|---------------|-------------------------|-------------|-------|-------|
| SAL_DA9074AA | MDH-2014-00224   | SRR1188432    | 2001 | 6 | North America | United States | Enteritidis             | Enteritidis | 1425  | 14257 |
| SAL_DA9077AA | AZ_TG71071       | SRR1186369    | 2013 | 7 | North America | United States | Enteritidis             | Enteritidis | 27721 | 14254 |
| SAL_DA9086AA | AZ_TG71063       | SRR1186340    | 2013 | 7 | North America | United States | Enteritidis             | Enteritidis | 1425  | 14247 |
| SAL_DA9093AA | AZ_TG71051       | SRR1186320    | 2013 | 7 | North America | United States | Enteritidis             | Enteritidis | 1425  | 14241 |
| SAL_DA9097AA | MDH-2014-00197   | SRR1186219    | 2011 | 6 | North America | United States | Enteritidis             | Enteritidis | 1425  | 14238 |
| SAL_DA9135AA | NY_IDR1200027330 | SRR1185800    | 2012 | 8 | North America | United States | Enteritidis             | Enteritidis | 1425  | 14207 |
| SAL_DA9149AA | EC20110222       | GCF_000624275 | 2005 |   | North America | Canada        | Enteritidis             | Enteritidis | 1425  | 58327 |
| SAL_DA9150AA | SA19992322       | SRR1183745    | 1998 |   | North America | Canada        | Enteritidis             | Enteritidis | 1425  | 14193 |
| SAL_DA9152AA | EC20120008       | SRR1183999    | 2006 |   | North America | Canada        | Enteritidis             | Enteritidis | 1425  | 14191 |
| SAL_DA9153AA | EC20120007       | SRR1183998    | 2011 |   | North America | Canada        | Enteritidis             | Enteritidis | 1425  | 58208 |
| SAL_DA9154AA | EC20120005       | GCF_000623195 | 2011 |   | North America | Canada        | Enteritidis             | Enteritidis | 1425  | 14190 |
| SAL_DA9155AA | EC20120003       | GCF_000624415 | 2005 |   | North America | Canada        | Enteritidis             | Enteritidis | 1425  | 58207 |
| SAL_DA9156AA | EC20120002       | SRR1183995    | 2010 |   | North America | Canada        | Enteritidis             | Enteritidis | 1425  | 14188 |
| SAL_DA9157AA | EC20100134       | SRR1183994    | 2009 |   | North America | Canada        | Enteritidis (Predicted) | Enteritidis | 1425  | 14187 |
| SAL_DA9158AA | EC20100130       | GCF_000831045 | 2009 |   | North America | Canada        | Enteritidis (Predicted) | Enteritidis | 1425  | 14186 |
| SAL_DA9159AA | EC20090884       | SRR1183992    | 2009 |   | North America | Canada        | Enteritidis             | Enteritidis | 1425  | 14185 |
| SAL_DA9160AA | EC20090531       | SRR1183991    | 2009 |   | North America | Canada        | Enteritidis             | Enteritidis | 1425  | 14184 |
| SAL_DA9161AA | EC20090332       | SRR1183758    | 2008 |   | North America | Canada        | Enteritidis             | Enteritidis | 1425  | 14183 |
| SAL_DA9162AA | EC20090135       | SRR1183989    | 2008 |   | North America | Canada        | Enteritidis             | Enteritidis | 1425  | 14182 |
| SAL_DA9163AA | EC20090193       | SRR1183988    | 2008 |   | North America | Canada        | Enteritidis             | Enteritidis | 1425  | 14181 |
| SAL_DA9164AA | EC20100103       | SRR1183987    | 2009 |   | North America | Canada        | Enteritidis             | Enteritidis | 1425  | 14180 |
| SAL_DA9167AA | EC20111175       | SRR1183752    | 2011 |   | North America | Canada        | Enteritidis             | Enteritidis | 1425  | 14177 |
| SAL_DA9168AA | EC20110221       | GCF_000626235 | 2005 |   | North America | Canada        | Enteritidis             | Enteritidis | 1425  | 14176 |
| SAL_DA9170AA | EC20090641       | SRR1183981    | 2008 |   | North America | Canada        | Enteritidis             | Enteritidis | 1425  | 14174 |
| SAL_DA9172AA | EC20110353       | SRR1183979    | 2010 |   | North America | Canada        | Enteritidis             | Enteritidis | -2008 | 14172 |
| SAL_DA9173AA | EC20111095       | SRR1183744    | 2011 |   | North America | Canada        | Enteritidis             | Enteritidis | 1425  | 14136 |
| SAL_DA9175AA | EC20110360       | GCF_000623295 | 2004 |   | North America | Canada        | Enteritidis             | Enteritidis | 1425  | 14170 |
| SAL_DA9176AA | EC20110223       | SRR1183975    | 2005 |   | North America | Canada        | Enteritidis             | Enteritidis | 1425  | 14169 |
| SAL_DA9177AA | EC20110359       | SRR1183974    | 2004 |   | North America | Canada        | Enteritidis             | Enteritidis | 1425  | 14168 |
| SAL_DA9178AA | EC20110358       | SRR1183973    | 2009 |   | North America | Canada        | Enteritidis             | Enteritidis | 27446 | 14167 |
| SAL_DA9179AA | EC20110357       | GCF_000623355 | 2003 |   | North America | Canada        | Enteritidis             | Enteritidis | 27707 | 14166 |
| SAL_DA9181AA | EC20110354       | SRR1183970    | 2010 |   | North America | Canada        | Enteritidis             | Enteritidis | 1425  | 14164 |
| SAL_DA9182AA | EC20120969       | GCF_000625215 | 2012 |   | North America | Canada        | Enteritidis             | Enteritidis | 1425  | 58265 |
| SAL_DA9183AA | EC20120929       | SRR1183915    | 2012 |   | North America | Canada        | Enteritidis             | Enteritidis | 1425  | 14162 |
| SAL_DA9184AA | EC20120927       | GCF_000625155 | 2012 |   | North America | Canada        | Enteritidis             | Enteritidis | 1425  | 58267 |
| SAL_DA9185AA | EC20121689       | GCF_000624795 | 2012 |   | North America | Canada        | Enteritidis             | Enteritidis | 1425  | 58274 |
| SAL_DA9186AA | EC20120925       | GCF_000625135 | 2012 |   | North America | Canada        | Enteritidis             | Enteritidis | 1425  | 58277 |
| SAL_DA9187AA | EC20120918       | GCF_000625115 | 2012 |   | North America | Canada        | Enteritidis             | Enteritidis | 1425  | 58217 |
| SAL_DA9188AA | EC20120917       | GCF_000625095 | 2012 |   | North America | Canada        | Enteritidis             | Enteritidis | 1425  | 58218 |
| SAL_DA9189AA | EC20120774       | GCF_000625035 | 2012 |   | North America | Canada        | Enteritidis             | Enteritidis | 1425  | 58269 |
| SAL_DA9190AA | EC20120773       | GCF_000625015 | 2012 |   | North America | Canada        | Enteritidis             | Enteritidis | 1425  | 58220 |
| SAL_DA9191AA | EC20120738       | GCF_000624975 | 2012 |   | North America | Canada        | Enteritidis             | Enteritidis | 1425  | 58272 |
| SAL_DA9192AA | EC20120734       | GCF_000624955 | 2012 |   | North America | Canada        | Enteritidis             | Enteritidis | 1425  | 58222 |
| SAL_DA9193AA | EC20120687       | GCF_000625575 | 2011 |   | North America | Canada        | Enteritidis             | Enteritidis | 1425  | 58213 |
| SAL_DA9194AA | EC20120686       | GCF_000625555 | 2011 |   | North America | Canada        | Enteritidis             | Enteritidis | 1425  | 58264 |
| SAL_DA9195AA | EC20120597       | GCF_000625515 | 2011 |   | North America | Canada        | Enteritidis             | Enteritidis | 1425  | 58278 |
| SAL_DA9196AA | EC20120590       | GCF_000625495 | 2011 |   | North America | Canada        | Enteritidis             | Enteritidis | 26751 | 58201 |
| SAL_DA9197AA | EC20120581       | GCF_000625475 | 2011 |   |               |               | Enteritidis             | Enteritidis | 1425  | 58261 |
| SAL_DA9198AA | EC20120580       | GCF_000625455 | 2011 |   |               |               | Enteritidis             | Enteritidis | 1425  | 58271 |
| SAL_DA9199AA | EC20120356       | GCF_000624535 | 2011 |   | North America | Canada        | Enteritidis             | Enteritidis | 27703 | 58240 |
| SAL_DA9200AA | EC20120051       | GCF_000625835 | 2011 |   | North America | Canada        | Enteritidis             | Enteritidis | 27712 | 58310 |
| SAL_DA9201AA | EC20100325       | SRR1183897    | 2010 |   | North America | Canada        | Enteritidis             | Enteritidis | 27700 | 14144 |
| SAL_DA9202AA | EC20100089       | GCF_000625435 | 2009 |   | North America | Canada        | Enteritidis             | Enteritidis | 1425  | 58230 |
| SAL_DA9203AA | EC20100088       | GCF_000625415 | 2009 |   | North America | Canada        | Enteritidis             | Enteritidis | 1425  | 58231 |
| SAL_DA9204AA | EC20121180       | SRR1183894    |      |   | North America | Canada        | Enteritidis             | Enteritidis | 1425  | 14141 |
| SAL_DA9205AA | EC20121179       | GCF_000623115 |      |   | North America | Canada        | Enteritidis             | Enteritidis | -1697 | 14140 |
| SAL_DA9206AA | EC20121178       | SRR1183892    |      |   | North America | Canada        | Enteritidis             | Enteritidis | 1425  | 14139 |
| SAL_DA9207AA | EC20121177       | GCA_000624175 |      |   | North America | Canada        | Enteritidis             | Enteritidis | 1425  | 14138 |
| SAL_DA9209AA | EC20121175       | SRR1183889    |      |   | North America | Canada        | Enteritidis             | Enteritidis | 1425  | 14136 |

|              |            |               |      |               |        |                         |             |       |       |
|--------------|------------|---------------|------|---------------|--------|-------------------------|-------------|-------|-------|
| SAL_DA9210AA | EC20130348 | GCF_000626075 | 2010 | North America | Canada | Enteritidis             | Enteritidis | 27446 | 58256 |
| SAL_DA9211AA | EC20130347 | GCF_000626055 | 2010 | North America | Canada | Enteritidis             | Enteritidis | 1425  | 58259 |
| SAL_DA9212AA | EC20130346 | SRR1183886    | 2010 | North America | Canada | Enteritidis             | Enteritidis | 1425  | 58252 |
| SAL_DA9213AA | EC20130345 | GCF_000626015 | 2008 | North America | Canada | Enteritidis             | Enteritidis | 1425  | 58253 |
| SAL_DA9214AA | EC20090195 | SRR1183884    | 2008 | North America | Canada | Enteritidis             | Enteritidis | 1425  | 58318 |
| SAL_DA9215AA | EC20100100 | GCF_000968775 | 2009 | North America | Canada | Enteritidis (Predicted) | Enteritidis | 1425  | 58306 |
| SAL_DA9216AA | EC20090530 | GCF_000625395 | 2009 | North America | Canada | Enteritidis             | Enteritidis | 1425  | 58232 |
| SAL_DA9217AA | EC20100131 | GCF_000625715 | 2009 | North America | Canada | Enteritidis             | Enteritidis | 1425  | 58316 |
| SAL_DA9218AA | EC20121969 | SRR1183880    | 2012 | North America | Canada | Enteritidis             | Enteritidis | 1425  | 58215 |
| SAL_DA9219AA | EC20121970 | GCF_000625335 | 2012 | North America | Canada | Enteritidis             | Enteritidis | 1425  | 58212 |
| SAL_DA9220AA | EC20121976 | SRR1183878    | 2012 | North America | Canada | Enteritidis             | Enteritidis | 1425  | 58211 |
| SAL_DA9221AA | EC20121986 | GCF_000625795 | 2012 | North America | Canada | Enteritidis             | Enteritidis | 1425  | 58210 |
| SAL_DA9222AA | EC20121989 | SRR1183876    | 2012 | North America | Canada | Enteritidis             | Enteritidis | 1425  | 58209 |
| SAL_DA9223AA | EC20121990 | GCF_000625875 | 2012 | North America | Canada | Enteritidis             | Enteritidis | 1425  | 58229 |
| SAL_DA9224AA | EC20122022 | GCF_000625895 | 2012 | North America | Canada | Enteritidis             | Enteritidis | 1425  | 58321 |
| SAL_DA9225AA | EC20122026 | GCF_000625915 | 2012 | North America | Canada | Enteritidis             | Enteritidis | 1425  | 58228 |
| SAL_DA9226AA | EC20122031 | SRR1183872    | 2012 | North America | Canada | Enteritidis             | Enteritidis | 1425  | 58227 |
| SAL_DA9227AA | EC20122033 | GCF_000625955 | 2012 | North America | Canada | Enteritidis             | Enteritidis | 1425  | 58255 |
| SAL_DA9228AA | EC20122045 | SRR1183870    | 2012 | North America | Canada | Enteritidis             | Enteritidis | 1425  | 58254 |
| SAL_DA9229AA | EC20111561 | GCF_000624355 | 2010 | North America | Canada | Enteritidis             | Enteritidis | 1425  | 58206 |
| SAL_DA9230AA | EC20121812 | SRR1183868    | 2011 | North America | Canada | Enteritidis             | Enteritidis | 26641 | 58263 |
| SAL_DA9231AA | EC20120916 | SRR1183867    | 2012 | North America | Canada | Enteritidis             | Enteritidis | -1733 | 14114 |
| SAL_DA9232AA | EC20120994 | GCA_000624675 | 2012 | North America | Canada | Enteritidis             | Enteritidis | 1425  | 58182 |
| SAL_DA9233AA | EC20120497 | GCF_000624595 | 2010 | North America | Canada | Enteritidis             | Enteritidis | 1425  | 58237 |
| SAL_DA9234AA | EC20111554 | GCF_000624335 | 2010 | North America | Canada | Enteritidis             | Enteritidis | 1425  | 58285 |
| SAL_DA9235AA | EC20120555 | GCF_000623255 | 2010 | North America | Canada | Enteritidis             | Enteritidis | 1425  | 58308 |
| SAL_DA9236AA | EC20121671 | GCF_000624755 | 2012 | North America | Canada | Enteritidis             | Enteritidis | 1425  | 58279 |
| SAL_DA9237AA | EC20120765 | GCF_000624995 | 2011 | North America | Canada | Enteritidis             | Enteritidis | 1425  | 58221 |
| SAL_DA9238AA | EC20121746 | GCF_000624855 | 2011 | North America | Canada | Enteritidis             | Enteritidis | 1425  | 58287 |
| SAL_DA9240AA | EC20121672 | GCF_000624775 | 2012 | North America | Canada | Enteritidis             | Enteritidis | 1425  | 58276 |
| SAL_DA9241AA | EC20121748 | GCF_000624875 | 2011 | North America | Canada | Enteritidis             | Enteritidis | 1425  | 58225 |
| SAL_DA9242AA | EC20120677 | SRR1183856    | 2011 | North America | Canada | Enteritidis             | Enteritidis | 1425  | 58313 |
| SAL_DA9243AA | EC20120968 | GCF_000625195 | 2012 | North America | Canada | Enteritidis             | Enteritidis | 1425  | 58325 |
| SAL_DA9244AA | EC20121542 | SRR1183854    | 2012 | North America | Canada | Enteritidis             | Enteritidis | 1425  | 58291 |
| SAL_DA9245AA | EC20120496 | GCF_000624575 | 2010 | North America | Canada | Enteritidis             | Enteritidis | 1425  | 58238 |
| SAL_DA9246AA | EC20121765 | SRR1183852    | 2011 | North America | Canada | Enteritidis             | Enteritidis | 27446 | 58319 |
| SAL_DA9247AA | EC20121744 | GCF_000624835 | 2011 | North America | Canada | Enteritidis             | Enteritidis | 1425  | 58273 |
| SAL_DA9248AA | EC20120697 | GCA_000625595 | 2011 |               |        | Enteritidis             | Enteritidis | 1425  | 58183 |
| SAL_DA9249AA | EC20120469 | GCF_000624555 | 2010 | North America | Canada | Enteritidis             | Enteritidis | 1425  | 58239 |
| SAL_DA9250AA | EC20121753 | GCF_000624935 | 2011 | North America | Canada | Enteritidis             | Enteritidis | 1425  | 58223 |
| SAL_DA9251AA | EC20120722 | GCF_000625615 | 2012 | North America | Canada | Enteritidis             | Enteritidis | 1425  | 58214 |
| SAL_DA9252AA | EC20111510 | GCF_000626555 | 2010 | North America | Canada | Enteritidis             | Enteritidis | 1425  | 58311 |
| SAL_DA9253AA | EC20120219 | GCF_000624475 | 2010 | North America | Canada | Enteritidis             | Enteritidis | 1425  | 58283 |
| SAL_DA9254AA | EC20120229 | GCF_000624495 | 2010 | North America | Canada | Enteritidis             | Enteritidis | 1425  | 58282 |
| SAL_DA9255AA | EC20120240 | GCF_000624515 | 2010 | North America | Canada | Enteritidis             | Enteritidis | 1425  | 58241 |
| SAL_DA9256AA | EC20120498 | GCF_000624615 | 2010 | North America | Canada | Enteritidis             | Enteritidis | 1425  | 58236 |
| SAL_DA9257AA | EC20120505 | GCF_000624635 | 2010 | North America | Canada | Enteritidis             | Enteritidis | 1425  | 58235 |
| SAL_DA9258AA | EC20120548 | GCF_000623235 | 2010 | North America | Canada | Enteritidis             | Enteritidis | 1425  | 58301 |
| SAL_DA9259AA | EC20120970 | GCF_000625235 | 2012 | North America | Canada | Enteritidis             | Enteritidis | 1425  | 58275 |
| SAL_DA9260AA | EC20121750 | GCF_000624895 | 2011 | North America | Canada | Enteritidis             | Enteritidis | 1425  | 58270 |
| SAL_DA9261AA | EC20121751 | GCF_000624915 | 2011 | North America | Canada | Enteritidis             | Enteritidis | 1425  | 58224 |
| SAL_DA9262AA | EC20111514 | GCF_000624295 | 2010 | North America | Canada | Enteritidis             | Enteritidis | 1425  | 58288 |
| SAL_DA9263AA | EC20111515 | GCF_000624315 | 2010 | North America | Canada | Enteritidis             | Enteritidis | 1425  | 58326 |
| SAL_DA9264AA | EC20120528 | GCF_000624655 | 2010 | North America | Canada | Enteritidis             | Enteritidis | 1425  | 58281 |
| SAL_DA9265AA | EC20120544 | GCF_000623215 | 2010 | North America | Canada | Enteritidis             | Enteritidis | 1425  | 58302 |
| SAL_DA9266AA | EC20111576 | GCF_000624375 | 2010 | North America | Canada | Enteritidis             | Enteritidis | 1425  | 58284 |
| SAL_DA9267AA | EC20120685 | SRR1183831    | 2011 | North America | Canada | Enteritidis             | Enteritidis | 1425  | 58324 |
| SAL_DA9268AA | EC20120775 | GCF_000625055 | 2012 | North America | Canada | Enteritidis             | Enteritidis | 1425  | 58268 |
| SAL_DA9269AA | EC20120776 | SRR1183829    | 2012 | North America | Canada | Enteritidis             | Enteritidis | 1425  | 58219 |

|              |                  |               |      |               |               |                         |             |        |       |
|--------------|------------------|---------------|------|---------------|---------------|-------------------------|-------------|--------|-------|
| SAL_DA9270AA | EC20120963       | GCF_000625175 | 2012 | North America | Canada        | Enteritidis             | Enteritidis | 1425   | 58266 |
| SAL_DA9271AA | EC20121004       | GCF_000624695 | 2012 | North America | Canada        | Enteritidis             | Enteritidis | 1425   | 58286 |
| SAL_DA9272AA | EC20120200       | SRR1183826    | 2010 | North America | Canada        | Enteritidis             | Enteritidis | 26645  | 14074 |
| SAL_DA9273AA | EC20120213       | GCF_000624455 | 2010 | North America | Canada        | Enteritidis             | Enteritidis | 1425   | 58303 |
| SAL_DA9274AA | EC20121826       | GCF_000625295 | 2011 | North America | Canada        | Enteritidis             | Enteritidis | 1425   | 58216 |
| SAL_DA9275AA | EC20121825       | GCF_000625275 | 2011 | North America | Canada        | Enteritidis             | Enteritidis | 1425   | 58262 |
| SAL_DA9276AA | EC20121541       | SRR1183822    | 2012 | North America | Canada        | Enteritidis             | Enteritidis | 1425   | 58280 |
| SAL_DA9277AA | SA20094079       | GCF_000624015 | 2009 | North America | Canada        | Enteritidis             | Enteritidis | 1425   | 14069 |
| SAL_DA9278AA | SA20091739       | GCF_000623835 | 2009 | North America | Canada        | Enteritidis             | Enteritidis | 1425   | 58242 |
| SAL_DA9279AA | SA20093538       | GCF_000623895 | 2009 | North America | Canada        | Enteritidis             | Enteritidis | 1425   | 58307 |
| SAL_DA9280AA | SA20090877       | SRR1183818    | 2009 | North America | Canada        | Enteritidis             | Enteritidis | 49194  | 58243 |
| SAL_DA9281AA | SA20093543       | GCF_000623915 | 2009 | North America | Canada        | Enteritidis             | Enteritidis | 1425   | 58315 |
| SAL_DA9282AA | SA20093950       | SRR1183816    | 2009 | North America | Canada        | Enteritidis             | Enteritidis | 1425   | 58297 |
| SAL_DA9283AA | SA20094642       | GCF_000624135 | 2009 | North America | Canada        | Enteritidis             | Enteritidis | 1425   | 58203 |
| SAL_DA9284AA | SA20090419       | GCA_000625355 | 2008 | North America | Canada        | Enteritidis             | Enteritidis | 1425   | 58234 |
| SAL_DA9285AA | SA20094383       | GCF_000624075 | 2009 | North America | Canada        | Enteritidis             | Enteritidis | 26744  | 58298 |
| SAL_DA9286AA | SA20094389       | GCF_000624095 | 2009 | North America | Canada        | Enteritidis             | Enteritidis | 1425   | 58292 |
| SAL_DA9287AA | SA20093421       | GCF_000623855 | 2009 | North America | Canada        | Enteritidis             | Enteritidis | 1425   | 58299 |
| SAL_DA9288AA | SA20090435       | GCF_000625375 | 2008 | North America | Canada        | Enteritidis             | Enteritidis | -11716 | 58233 |
| SAL_DA9289AA | SA20093430       | GCF_000623875 | 2009 | North America | Canada        | Enteritidis             | Enteritidis | 1425   | 58300 |
| SAL_DA9290AA | SA20093788       | GCF_000623955 | 2009 | North America | Canada        | Enteritidis             | Enteritidis | 1425   | 58295 |
| SAL_DA9291AA | SA20093977       | GCF_000623995 | 2009 | North America | Canada        | Enteritidis             | Enteritidis | 27686  | 58294 |
| SAL_DA9292AA | SA20093784       | GCF_000623935 | 2009 | North America | Canada        | Enteritidis             | Enteritidis | 27689  | 58296 |
| SAL_DA9293AA | SA20092320       | GCF_000624195 | 2009 |               |               | Enteritidis             | Enteritidis | 49195  | 58290 |
| SAL_DA9294AA | SA20095309       | GCF_000624235 | 2009 | North America | Canada        | Enteritidis             | Enteritidis | 1425   | 58205 |
| SAL_DA9295AA | SA20083456       | GCF_000623495 | 2008 | North America | Canada        | Enteritidis             | Enteritidis | 1425   | 58250 |
| SAL_DA9297AA | SA20094350       | GCF_000624035 | 2009 | North America | Canada        | Enteritidis             | Enteritidis | 1425   | 58293 |
| SAL_DA9298AA | SA20094803       | GCF_000624215 | 2009 | North America | Canada        | Enteritidis             | Enteritidis | 1425   | 58204 |
| SAL_DA9299AA | SA19982831       | GCF_000623415 | 1998 | North America | Canada        | Enteritidis             | Enteritidis | 1425   | 58257 |
| SAL_DA9301AA | SA19930684       | GCF_000623555 | 1993 | North America | Canada        | Enteritidis             | Enteritidis | 1425   | 58248 |
| SAL_DA9302AA | SA19994216       | GCA_000623475 | 1999 | North America | Canada        | Enteritidis             | Enteritidis | 1425   | 14045 |
| SAL_DA9303AA | SA19983126       | GCF_000623435 | 1998 | North America | Canada        | Enteritidis             | Enteritidis | 1425   | 58260 |
| SAL_DA9304AA | SA19961622       | GCF_000623635 | 1996 | North America | Canada        | Enteritidis             | Enteritidis | 1425   | 58245 |
| SAL_DA9305AA | SA19971331       | SRR1183793    | 1997 | North America | Canada        | Enteritidis             | Enteritidis | 1425   | 58244 |
| SAL_DA9306AA | SA20123395       | GCF_000625995 | 2012 | North America | Canada        | Enteritidis             | Enteritidis | 1425   | 58258 |
| SAL_DA9307AA | SA19943269       | SRR1183791    | 1994 | North America | Canada        | Enteritidis             | Enteritidis | 1425   | 58246 |
| SAL_DA9308AA | SA19942384       | GCF_000623575 | 1994 | North America | Canada        | Enteritidis             | Enteritidis | 1425   | 58247 |
| SAL_DA9309AA | SA20095440       | GCF_000624255 | 2009 | North America | Canada        | Enteritidis             | Enteritidis | 1425   | 58181 |
| SAL_DA9310AA | SA20094352       | SRR1183788    | 2009 | North America | Canada        | Enteritidis             | Enteritidis | 1425   | 14038 |
| SAL_DA9311AA | SA20083636       | GCF_000623515 | 2008 | North America | Canada        | Enteritidis             | Enteritidis | 27675  | 58251 |
| SAL_DA9312AA | SA20085285       | SRR1183786    | 2008 | North America | Canada        | Enteritidis             | Enteritidis | 27675  | 58184 |
| SAL_DA9313AA | SA20082034       | GCA_000625855 | 2008 | North America | Canada        | Enteritidis             | Enteritidis | 27675  | 14036 |
| SAL_DA9314AA | SA19960848       | SRR1183784    | 1996 | North America | Canada        | Enteritidis             | Enteritidis | 1425   | 14035 |
| SAL_DA9315AA | SA19981857       | SRR1183783    | 1998 | North America | Canada        | Enteritidis             | Enteritidis | 1425   | 14034 |
| SAL_DA9316AA | SA19981522       | SRR1183782    | 1998 | North America | Canada        | Enteritidis             | Enteritidis | 1425   | 14033 |
| SAL_DA9317AA | SA20094521       | GCF_000624115 | 2009 | North America | Canada        | Enteritidis             | Enteritidis | 49194  | 58202 |
| SAL_DA9318AA | SA20121703       | GCF_000624815 | 2012 | North America | Canada        | Enteritidis             | Enteritidis | 1425   | 58289 |
| SAL_DA9319AA | SA20100349       | GCA_000968795 | 2010 | North America | Canada        | Enteritidis (Predicted) | Enteritidis | 1425   | 58187 |
| SAL_DA9320AA | SA20100239       | GCF_000625735 | 2010 | North America | Canada        | Enteritidis             | Enteritidis | 1425   | 58314 |
| SAL_DA9321AA | SA20084644       | GCF_000626475 | 2008 | North America | Canada        | Enteritidis             | Enteritidis | 1425   | 58305 |
| SAL_DA9324AA | SA20084384       | SRR1183774    | 2008 | North America | Canada        | Enteritidis             | Enteritidis | 1425   | 58249 |
| SAL_DA9325AA | SA20094682       | GCF_000625695 | 2009 | North America | Canada        | Enteritidis             | Enteritidis | 1425   | 58317 |
| SAL_DA9326AA | SA20093266       | SRR1183772    | 2009 | North America | Canada        | Enteritidis             | Enteritidis | 1425   | 14023 |
| SAL_DA9327AA | SA19970769       | SRR1183771    | 1997 | North America | Canada        | Enteritidis             | Enteritidis | 1425   | 14022 |
| SAL_DA9328AA | SA19970510       | GCF_000623655 | 1997 | North America | Canada        | Enteritidis             | Enteritidis | 1425   | 14021 |
| SAL_DA9329AA | SA19980677       | SRR1183769    | 1998 | North America | Canada        | Enteritidis             | Enteritidis | 1425   | 14020 |
| SAL_DA9365AA | WAPHL-SAL-A00228 | SRR1181547    | 2002 | North America | United States | Enteritidis             | Enteritidis | 1425   | 13988 |
| SAL_DA9373AA | WAPHL-SAL-A00221 | SRR1181526    | 2002 | North America | United States | Enteritidis             | Enteritidis | 1425   | 13981 |
| SAL_DA9374AA | WAPHL-SAL-A00216 | SRR1181525    | 2002 | North America | United States | Enteritidis             | Enteritidis | 1425   | 13981 |

|              |                      |            |      |    |               |               |                                    |             |      |       |
|--------------|----------------------|------------|------|----|---------------|---------------|------------------------------------|-------------|------|-------|
| SAL_DA9377AA | WAPHL-SAL-A00237     | SRR1181520 | 2002 |    | North America | United States | Enteritidis                        | Enteritidis | 1425 | 13978 |
| SAL_DA9434AA | WAPHL_SAL-A00196     | SRR1177580 | 2004 |    | North America | United States | Enteritidis                        | Enteritidis | 1425 | 13840 |
| SAL_DA9444AA | WAPHL_SAL-A00198     | SRR1177566 | 2004 |    | North America | United States | Enteritidis                        | Enteritidis | 1425 | 13840 |
| SAL_DA9445AA | WAPHL_SAL-A00194     | SRR1177565 | 2010 |    | North America | United States | Enteritidis                        | Enteritidis | 1425 | 13919 |
| SAL_DA9467AA | WAPHL_SAL-A00173     | SRR1177367 | 2012 | 1  | North America | United States | Enteritidis                        | Enteritidis | 1425 | 13899 |
| SAL_DA9491AA | WAPHL_SAL-A00195     | SRR1177301 | 2004 |    | North America | United States | Enteritidis                        | Enteritidis | 1425 | 13840 |
| SAL_DA9532AA | WAPHL_SAL-A00199     | SRR1177234 | 2004 |    | North America | United States | Enteritidis                        | Enteritidis | 1425 | 13840 |
| SAL_DA9540AA | NY_IDR1000024945X1   | SRR1177214 | 2010 | 7  | North America | United States | Typhimurium var. O5 - (Copenhagen) | Enteritidis | 1425 | 13832 |
| SAL_DA9558AA | WAPHL_SAL-A00200     | SRR1177180 | 2004 |    | North America | United States | Enteritidis                        | Enteritidis | 1425 | 13814 |
| SAL_DA9623AA | FNW19G90             | SRR1175785 | 2010 | 7  | North America | United States | Enteritidis                        | Enteritidis | 1425 | 13766 |
| SAL_DA9625AA | FNW19G89             | SRR1175782 | 2010 | 7  | North America | United States | Enteritidis                        | Enteritidis | 1425 | 13765 |
| SAL_DA9651AA | MDH-2013-00173       | SRR1170901 | 2012 | 8  | North America | United States | Enteritidis                        | Enteritidis | 1425 | 13741 |
| SAL_DA9734AA | MDH-2013-00075       | SRR1164605 | 2009 | 4  | North America | United States | Enteritidis                        | Enteritidis | 1425 | 13664 |
| SAL_DA9773AA | MDH-2013-00050       | SRR1164562 | 2008 | 9  | North America | United States | Enteritidis                        | Enteritidis | 1425 | 13628 |
| SAL_DA9819AA | WAPHL_SAL-A00189     | SRR1158158 | 2003 |    | North America | United States | Enteritidis                        | Enteritidis | 1425 | 13584 |
| SAL_DA9828AA | WAPHL_SAL-A00187     | SRR1158135 | 2006 |    | North America | United States | Enteritidis                        | Enteritidis | 1425 | 13575 |
| SAL_DA9859AA | WAPHL_SAL-A00184     | SRR1158049 | 2005 |    | North America | United States | Enteritidis                        | Enteritidis | 1425 | 13545 |
| SAL_DA9860AA | NY_BAC0900005834     | SRR1158048 | 2009 | 12 | North America | United States | I 9,12:-:-                         | Enteritidis | 1425 | 13544 |
| SAL_DA9881AA | WAPHL_SAL-A00193     | SRR1157978 | 2008 |    | North America | United States | Enteritidis                        | Enteritidis | 1425 | 13527 |
| SAL_DA9885AA | WAPHL_SAL-A00188     | SRR1157967 | 2006 |    | North America | United States | Enteritidis                        | Enteritidis | 1425 | 13523 |
| SAL_DA9891AA | WAPHL_SAL-A00191     | SRR1157942 | 1986 |    | North America | United States | Enteritidis                        | Enteritidis | 1425 | 13517 |
| SAL_DA9893AA | NY_BAC0900001112     | SRR1157940 | 2009 | 3  | North America | United States | Enteritidis                        | Enteritidis | 1425 | 5905  |
| SAL_DA9901AA | MDH-2013-00106       | SRR1157899 | 2010 | 1  | North America | United States | Enteritidis                        | Enteritidis | 1425 | 13509 |
| SAL_DA9902AA | WAPHL_SAL-A00185     | SRR1157898 | 2004 |    | North America | United States | Enteritidis                        | Enteritidis | 1425 | 13508 |
| SAL_DA9910AA | WAPHL_SAL-A00192     | SRR1157879 | 2003 |    | North America | United States | Enteritidis                        | Enteritidis | 1425 | 13502 |
| SAL_DA9915AA | FSF0075              | SRR1157867 | 2011 | 7  | Asia          | China         | Enteritidis                        | Enteritidis | 1425 | 13499 |
| SAL_DA9920AA | MDH-2013-00077       | SRR1157840 | 2009 | 4  | North America | United States | Enteritidis                        | Enteritidis | 1425 | 13495 |
| SAL_DA9933AA | MDH-2013-00090       | SRR1157605 | 2009 | 8  | North America | United States | Enteritidis                        | Enteritidis | 1425 | 13484 |
| SAL_DA9970AA | WAPHL_SAL-A00174     | SRR1141178 | 2012 | 1  | North America | United States | Enteritidis                        | Enteritidis | 1425 | 13454 |
| SAL_DA9973AA | WAPHL_SAL-A00144     | SRR1141171 | 2012 | 4  | North America | United States | Enteritidis                        | Enteritidis | 1425 | 13451 |
| SAL_DA9978AA | WAPHL_SAL-A00147     | SRR1141152 | 2012 | 4  | North America | United States | Enteritidis                        | Enteritidis | 1425 | 13447 |
| SAL_DA9980AA | WAPHL_SAL-A00171     | SRR1141135 | 2012 | 1  | North America | United States | Enteritidis                        | Enteritidis | 1425 | 13300 |
| SAL_EA0013AA | FNE0001              | SRR1121759 | 2012 | 5  |               |               | Enteritidis (Predicted)            | Enteritidis | 1425 | 13417 |
| SAL_EA0041AA | NY_IDR1100031092-9T1 | SRR1107484 | 2011 | 10 | North America | United States | Enteritidis                        | Enteritidis | 1425 | 13401 |
| SAL_EA0048AA | FNE0025              | SRR1107477 | 2011 | 7  | Asia          | Hong Kong     | Enteritidis                        | Enteritidis | 1425 | 13397 |
| SAL_EA0065AA | NY_IDR1200019824-2L  | SRR1107460 | 2012 | 6  | North America | United States | Enteritidis                        | Enteritidis | 1425 | 13381 |
| SAL_EA0084AA | WAPHL_SAL-A00160     | SRR1106266 | 2011 | 11 | North America | United States | Enteritidis                        | Enteritidis | 1425 | 13363 |
| SAL_EA0091AA | WAPHL_SAL-A00131     | SRR1106259 | 2012 | 3  | North America | United States | Enteritidis                        | Enteritidis | 1425 | 13358 |
| SAL_EA0093AA | WAPHL_SAL-A00138     | SRR1106257 | 2012 | 4  | North America | United States | Enteritidis                        | Enteritidis | 1425 | 13356 |
| SAL_EA0101AA | WAPHL_SAL-A00169     | SRR1106249 | 2011 | 12 | North America | United States | Enteritidis                        | Enteritidis | 1425 | 13349 |
| SAL_EA0105AA | WAPHL_SAL-A00148     | SRR1106245 | 2012 | 4  | North America | United States | Enteritidis                        | Enteritidis | 1425 | 13345 |
| SAL_EA0112AA | WAPHL_SAL-A00159     | SRR1106237 | 2011 | 11 | North America | United States | Enteritidis                        | Enteritidis | 1425 | 13338 |
| SAL_EA0115AA | NY_BAC0800006747     | SRR1106234 | 2008 | 11 | North America | United States | Enteritidis                        | Enteritidis | 1425 | 13335 |
| SAL_EA0116AA | WAPHL_SAL-A00123     | SRR1106233 | 2012 | 3  | North America | United States | Enteritidis                        | Enteritidis | 1425 | 13334 |
| SAL_EA0127AA | NY_IDR1000021807     | SRR1106222 | 2010 | 6  | North America | United States | Enteritidis                        | Enteritidis | 1425 | 13324 |
| SAL_EA0142AA | WAPHL_SAL-A00094     | SRR1106207 | 2008 | 10 | North America | United States | Enteritidis                        | Enteritidis | 1425 | 13310 |
| SAL_EA0152AA | WAPHL_SAL-A00112     | SRR1106179 | 2012 | 11 |               |               | Enteritidis                        | Enteritidis | 1425 | 13300 |
| SAL_EA0154AA | WAPHL_SAL-A00152     | SRR1106177 | 2011 | 11 | North America | United States | Enteritidis                        | Enteritidis | 1425 | 13298 |
| SAL_EA0157AA | WAPHL_SAL-A00156     | SRR1106174 | 2011 | 11 | North America | United States | Enteritidis                        | Enteritidis | 1425 | 13295 |
| SAL_EA0158AA | WAPHL_SAL-A00113     | SRR1106173 | 2012 | 11 |               |               | Enteritidis                        | Enteritidis | 1425 | 13294 |
| SAL_EA0159AA | WAPHL_SAL-A00161     | SRR1106172 | 2011 | 11 | North America | United States | Enteritidis                        | Enteritidis | 1425 | 13293 |
| SAL_EA0160AA | WAPHL_SAL-A00136     | SRR1106171 | 2012 | 3  | North America | United States | Enteritidis                        | Enteritidis | 1425 | 13292 |
| SAL_EA0162AA | WAPHL_SAL-A00163     | SRR1106168 | 2011 | 12 | North America | United States | Enteritidis                        | Enteritidis | 1425 | 13290 |
| SAL_EA0164AA | WAPHL_SAL-A00164     | SRR1106166 | 2011 | 12 | North America | United States | Enteritidis                        | Enteritidis | 1425 | 13288 |
| SAL_EA0268AA | FSW0074              | SRR1068360 | 2010 | 11 | Asia          | Indonesia     | Enteritidis                        | Enteritidis | 1425 | 13196 |
| SAL_EA0324AA | NY_02022200          | SRR1067669 | 2004 | 8  | North America | United States | Enteritidis                        | Enteritidis | 1425 | 12432 |
| SAL_EA0328AA | NY_02035028          | SRR1067665 | 2009 | 11 | North America | United States | Enteritidis                        | Enteritidis | 1425 | 13143 |
| SAL_EA0338AA | NY_02037914          | SRR1067655 | 2011 | 2  | North America | United States | Enteritidis                        | Enteritidis | 1425 | 13135 |
| SAL_EA0349AA | NY_02034766          | SRR1067644 | 2009 | 9  | North America | United States | Enteritidis                        | Enteritidis | 1425 | 13126 |

|              |                           |            |      |    |               |               |                         |             |       |       |
|--------------|---------------------------|------------|------|----|---------------|---------------|-------------------------|-------------|-------|-------|
| SAL_EA0353AA | MDH-2013-00168            | SRR1067640 | 2012 | 6  | North America | United States | Enteritidis             | Enteritidis | 1425  | 13122 |
| SAL_EA0367AA | NY_02037913               | SRR1067626 | 2011 | 2  | North America | United States | Enteritidis             | Enteritidis | 1425  | 13109 |
| SAL_EA0392AA | FCC0062                   | SRR1055756 | 2010 | 5  | North America | United States | Enteritidis             | Enteritidis | 1425  | 13087 |
| SAL_EA0401AA | FCC0063                   | SRR1055747 | 2010 | 5  | North America | United States | Enteritidis             | Enteritidis | 1425  | 13078 |
| SAL_EA0448AA | NY_02034452               | SRR1048627 | 2009 | 7  | North America | United States | Enteritidis             | Enteritidis | 1425  | 12432 |
| SAL_EA0449AA | MDH-2013-00179            | SRR1048623 | 2012 | 9  | North America | United States | Enteritidis             | Enteritidis | 1425  | 13034 |
| SAL_EA0457AA | NY_02034528               | SRR1048327 | 2009 | 7  | North America | United States | Enteritidis             | Enteritidis | 1425  | 13027 |
| SAL_EA0470AA | MDH-2013-00188            | SRR1048308 | 2013 | 2  | North America | United States | Enteritidis             | Enteritidis | 1425  | 13017 |
| SAL_EA0488AA | FCC0051                   | SRR1048275 | 2010 | 6  | North America | United States | Enteritidis             | Enteritidis | 1425  | 13002 |
| SAL_EA0494AA | FCC0050                   | SRR1048253 | 2010 | 6  | North America | United States | Enteritidis             | Enteritidis | 27809 | 12996 |
| SAL_EA0496AA | FSF0037                   | SRR1048249 | 2010 | 6  | Asia          | India         | Enteritidis             | Enteritidis | 1425  | 12994 |
| SAL_EA0541AA | NY_02034201               | SRR1043653 | 2009 | 6  | North America | United States | Enteritidis             | Enteritidis | 1425  | 12956 |
| SAL_EA0562AA | FCC0033                   | SRR1041529 | 2010 | 8  | North America | United States | Enteritidis             | Enteritidis | 1425  | 12942 |
| SAL_EA0577AA | NY_02033982               | SRR1041497 | 2009 | 4  | North America | United States | Enteritidis             | Enteritidis | 1425  | 12903 |
| SAL_EA0590AA | NY_02033961               | SRR1041473 | 2009 | 4  | North America | United States | Enteritidis             | Enteritidis | 1425  | 12917 |
| SAL_EA0593AA | FCC0035                   | SRR1041466 | 2010 | 8  | Asia          | Philippines   | Essen                   | Enteritidis | 27796 | 12914 |
| SAL_EA0605AA | NY_02033707               | SRR1036455 | 2009 | 2  | North America | United States | Enteritidis             | Enteritidis | 1425  | 12903 |
| SAL_EA0606AA | NY_02033580               | SRR1036454 | 2009 | 1  | North America | United States | Enteritidis             | Enteritidis | 1425  | 12902 |
| SAL_EA0607AA | NY_02033389               | SRR1036453 | 2008 | 11 | North America | United States | Enteritidis             | Enteritidis | 1425  | 12901 |
| SAL_EA0608AA | NY_02033071               | SRR1036452 | 2008 | 9  | North America | United States | Enteritidis             | Enteritidis | 1425  | 12900 |
| SAL_EA0609AA | NY_02033861               | SRR1036451 | 2009 | 3  | North America | United States | Enteritidis             | Enteritidis | 1425  | 12899 |
| SAL_EA0610AA | NY_02033339               | SRR1036450 | 2008 | 11 | North America | United States | Enteritidis             | Enteritidis | 1425  | 12432 |
| SAL_EA0613AA | NY_02033826               | SRR1036446 | 2009 | 3  | North America | United States | Enteritidis             | Enteritidis | 1425  | 12897 |
| SAL_EA0614AA | NY_02033388               | SRR1036445 | 2008 | 11 | North America | United States | Enteritidis             | Enteritidis | 1425  | 12432 |
| SAL_EA0624AA | NY_02033111               | SRR1036433 | 2008 | 9  | North America | United States | Enteritidis             | Enteritidis | 1425  | 12890 |
| SAL_EA0703AA | FAR0001                   | SRR1033533 | 2010 | 11 | North America | United States | Enteritidis             | Enteritidis | 1425  | 12822 |
| SAL_EA0746AA | FSW0023                   | SRR1033488 | 2011 | 9  | Asia          | China         | Enteritidis (Predicted) | Enteritidis | 1425  | 12788 |
| SAL_EA0755AA | swgs1009                  | SRR1033476 | 2013 | 9  | North America | United States | Enteritidis             | Enteritidis | 1425  | 12491 |
| SAL_EA0761AA | NY_02022468               | SRR1033470 | 2004 | 9  | North America | United States | Enteritidis             | Enteritidis | 1425  | 12777 |
| SAL_EA0797AA | NY_02032083               | SRR1030366 | 2008 | 4  | North America | United States | Enteritidis             | Enteritidis | 1425  | 12432 |
| SAL_EA0800AA | NY_02031589               | SRR1030363 | 2008 | 2  | North America | United States | Enteritidis             | Enteritidis | 1425  | 12432 |
| SAL_EA0802AA | NY_02031374               | SRR1030361 | 2008 | 1  | North America | United States | Enteritidis             | Enteritidis | 1425  | 12748 |
| SAL_EA0812AA | NY_02032082               | SRR1030350 | 2008 | 5  | North America | United States | Enteritidis             | Enteritidis | 1425  | 12738 |
| SAL_EA0878AA | SAEN19-sc-2013-02-27T10:2 | ERR311285  |      |    |               |               | Enteritidis             | Enteritidis | 1424  | 41379 |
| SAL_EA0916AA | SAEN437-sc-2013-02-27T10: | ERR311305  |      |    |               |               | Enteritidis             | Enteritidis | 1425  | 12676 |
| SAL_EA0932AA | SAEN84-sc-2013-02-27T10:2 | ERR311289  |      |    |               |               | Enteritidis             | Enteritidis | 1424  | 41076 |
| SAL_EA0942AA | ASERH121644-sc-2013-02-28 | ERR304840  |      |    |               |               | Enteritidis             | Enteritidis | 3906  | 12667 |
| SAL_EA0948AA | ASERH120656-sc-2013-02-28 | ERR304834  |      |    |               |               | Enteritidis (Predicted) | Enteritidis | 3888  | 12619 |
| SAL_EA0949AA | ASERH121498-sc-2013-02-28 | ERR304833  |      |    |               |               | Enteritidis             | Enteritidis | 3888  | 12619 |
| SAL_EA0962AA | ASERH116267-sc-2013-02-28 | ERR304820  |      |    |               |               | Enteritidis             | Enteritidis | 1425  | 12654 |
| SAL_EA0974AA | ASERH111712-sc-2013-02-28 | ERR304808  |      |    |               |               | Enteritidis (Predicted) | Enteritidis | 1425  | 12645 |
| SAL_EA0975AA | ASERH117224-sc-2013-02-28 | ERR304807  |      |    |               |               | Enteritidis (Predicted) | Enteritidis | 1425  | 12645 |
| SAL_EA0976AA | ASERH110579-sc-2013-02-28 | ERR304806  |      |    |               |               | Enteritidis             | Enteritidis | 1425  | 12644 |
| SAL_EA0979AA | ASERH112876-sc-2013-02-28 | ERR304803  |      |    |               |               | Enteritidis             | Enteritidis | 1425  | 12642 |
| SAL_EA0984AA | ASERH114386-sc-2013-02-28 | ERR304871  |      |    |               |               | Enteritidis (Predicted) | Enteritidis | 1425  | 12638 |
| SAL_EA0988AA | ASERH120153-sc-2013-02-28 | ERR304867  |      |    |               |               | Enteritidis (Predicted) | Enteritidis | 1425  | 12636 |
| SAL_EA0992AA | ASERH085062-sc-2013-02-28 | ERR304863  |      |    |               |               | Enteritidis (Predicted) | Enteritidis | 1425  | 12633 |
| SAL_EA0993AA | ASERH083817-sc-2013-02-28 | ERR304862  |      |    |               |               | Enteritidis (Predicted) | Enteritidis | 1425  | 12632 |
| SAL_EA1004AA | ASERH122384-sc-2013-02-28 | ERR304851  |      |    |               |               | Enteritidis             | Enteritidis | 3888  | 12624 |
| SAL_EA1006AA | ASERH121685-sc-2013-02-28 | ERR304849  |      |    |               |               | Enteritidis             | Enteritidis | 1425  | 12622 |
| SAL_EA1010AA | ASERH120613-sc-2013-02-28 | ERR304845  |      |    |               |               | Enteritidis             | Enteritidis | 3888  | 12619 |
| SAL_EA1014AA | ASERH122848-sc-2013-02-28 | ERR304841  |      |    |               |               | Typhimurium             | Enteritidis | 3906  | 12615 |
| SAL_EA1147AA | 1025084                   | ERR279135  |      |    |               |               | Typhi                   | Enteritidis | 1425  | 12559 |
| SAL_EA1285AA | swgs1013                  | SRR1029938 | 2013 | 10 | North America | United States | Enteritidis             | Enteritidis | 1425  | 12496 |
| SAL_EA1286AA | swgs1006                  | SRR1029937 | 2013 | 9  | North America | United States | Enteritidis             | Enteritidis | 1425  | 12495 |
| SAL_EA1287AA | swgs1015                  | SRR1029936 | 2013 | 10 | North America | United States | Enteritidis             | Enteritidis | 1425  | 12494 |
| SAL_EA1288AA | swgs1012                  | SRR1029935 | 2013 | 10 | North America | United States | Enteritidis             | Enteritidis | 1425  | 12493 |
| SAL_EA1289AA | swgs1008                  | SRR1029934 | 2013 | 9  | North America | United States | Enteritidis             | Enteritidis | 8003  | 12492 |
| SAL_EA1290AA | swgs1004                  | SRR1029933 | 2013 | 9  | North America | United States | Enteritidis             | Enteritidis | 1425  | 12491 |

|              |                |            |      |    |               |               |                         |             |       |       |
|--------------|----------------|------------|------|----|---------------|---------------|-------------------------|-------------|-------|-------|
| SAL_EA1291AA | swgs1005       | SRR1029932 | 2013 | 9  | North America | United States | Enteritidis             | Enteritidis | 1425  | 12490 |
| SAL_EA1292AA | swgs1016       | SRR1029931 | 2013 | 10 | North America | United States | Enteritidis             | Enteritidis | 1425  | 12489 |
| SAL_EA1293AA | swgs1014       | SRR1029930 | 2013 | 10 | North America | United States | Enteritidis             | Enteritidis | 1425  | 12488 |
| SAL_EA1294AA | swgs1010       | SRR1029929 | 2013 | 10 | North America | United States | Enteritidis             | Enteritidis | 1425  | 12487 |
| SAL_EA1295AA | swgs1007       | SRR1029928 | 2013 | 9  | North America | United States | Enteritidis             | Enteritidis | 1425  | 12486 |
| SAL_EA1296AA | swgs1011       | SRR1029927 | 2013 | 10 | North America | United States | Enteritidis             | Enteritidis | 1425  | 12485 |
| SAL_EA1297AA | swgs1003       | SRR1029926 | 2013 | 9  | North America | United States | Enteritidis             | Enteritidis | 1425  | 12484 |
| SAL_EA1303AA | MDH-2013-00190 | SRR1029577 | 2013 | 1  | North America | United States | Enteritidis             | Enteritidis | 1425  | 12478 |
| SAL_EA1313AA | AZ_TG68316     | SRR1029567 | 2010 |    | North America | United States | Enteritidis             | Enteritidis | 1425  | 12469 |
| SAL_EA1327AA | NY_02028764    | SRR1027064 | 2007 | 1  | North America | United States | Enteritidis             | Enteritidis | 1425  | 12455 |
| SAL_EA1328AA | NY_02027072    | SRR1027063 | 2006 | 7  | North America | United States | Enteritidis             | Enteritidis | 1425  | 12454 |
| SAL_EA1330AA | NY_02026187    | SRR1027061 | 2006 | 3  | North America | United States | Enteritidis             | Enteritidis | 1425  | 12452 |
| SAL_EA1348AA | AZ_TG68280     | SRR1023856 | 2010 |    | North America | United States | Enteritidis             | Enteritidis | 1425  | 12435 |
| SAL_EA1354AA | NY_02022758    | SRR1023850 | 2004 | 11 | North America | United States | Enteritidis             | Enteritidis | 1425  | 12434 |
| SAL_EA1355AA | NY_02022529    | SRR1023849 | 2004 | 10 | North America | United States | Enteritidis             | Enteritidis | 1425  | 12433 |
| SAL_EA1356AA | NY_02021643    | SRR1023848 | 2004 | 4  | North America | United States | Enteritidis             | Enteritidis | 1425  | 12432 |
| SAL_EA1404AA | AZ_TG68108     | SRR1021813 | 2008 |    | North America | United States | Enteritidis             | Enteritidis | 1425  | 12390 |
| SAL_EA1439AA | FSIS1500767    | SRR2239752 | 2014 |    | North America | United States | Enteritidis             | Enteritidis | 1425  | 12370 |
| SAL_EA1445AA | PNUSAS000806   | SRR2229853 | 2015 | 8  | North America | United States | Enteritidis             | Enteritidis | 1425  | 12364 |
| SAL_EA1446AA | PNUSAS000804   | SRR2229852 | 2015 | 8  | North America | United States | Enteritidis             | Enteritidis | 1425  | 12257 |
| SAL_EA1447AA | PNUSAS000803   | SRR2229851 | 2015 | 7  | North America | United States | Enteritidis             | Enteritidis | 1425  | 12363 |
| SAL_EA1448AA | PNUSAS000802   | SRR2229850 | 2015 | 7  | North America | United States | Enteritidis             | Enteritidis | 1425  | 11501 |
| SAL_EA1449AA | PNUSAS000801   | SRR2229663 | 2015 | 7  | North America | United States | Enteritidis             | Enteritidis | 1425  | 12362 |
| SAL_EA1450AA | PNUSAS000800   | SRR2229662 |      |    | North America | United States | Enteritidis (Predicted) | Enteritidis | 1425  | 12361 |
| SAL_EA1489AA | PNUSAS000703   | SRR2194504 | 2015 | 7  | North America | United States | Enteritidis             | Enteritidis | 1425  | 2690  |
| SAL_EA1490AA | PNUSAS000702   | SRR2194503 | 2015 | 7  | North America | United States | Enteritidis             | Enteritidis | 1425  | 12324 |
| SAL_EA1491AA | PNUSAS000701   | SRR2194502 | 2015 | 7  | North America | United States | Enteritidis             | Enteritidis | 1425  | 12323 |
| SAL_EA1492AA | PNUSAS000699   | SRR2194501 | 2015 | 7  | North America | United States | Enteritidis             | Enteritidis | 1425  | 12322 |
| SAL_EA1493AA | PNUSAS000667   | SRR2194500 | 2015 | 6  | North America | United States | Enteritidis             | Enteritidis | 1425  | 8925  |
| SAL_EA1494AA | PNUSAS000658   | SRR2194499 | 2015 | 6  | North America | United States | Enteritidis             | Enteritidis | 27885 | 12321 |
| SAL_EA1495AA | PNUSAS000617   | SRR2194498 | 2015 | 6  | North America | United States | Enteritidis             | Enteritidis | 1425  | 12320 |
| SAL_EA1496AA | PNUSAS000637   | SRR2194497 | 2015 | 5  | North America | United States | Enteritidis             | Enteritidis | 1425  | 12319 |
| SAL_EA1497AA | PNUSAS000635   | SRR2194496 | 2015 | 5  | North America | United States | Enteritidis             | Enteritidis | 1425  | 12253 |
| SAL_EA1498AA | PNUSAS000612   | SRR2194495 | 2015 | 5  | North America | United States | Enteritidis             | Enteritidis | 1425  | 12253 |
| SAL_EA1501AA | PNUSAS000700   | SRR2194265 | 2015 | 7  | North America | United States | Enteritidis             | Enteritidis | 27892 | 5650  |
| SAL_EA1503AA | PNUSAS000697   | SRR2194108 |      |    | North America | United States | Enteritidis (Predicted) | Enteritidis | 1425  | 12316 |
| SAL_EA1504AA | PNUSAS000696   | SRR2194103 |      |    | North America | United States | Enteritidis (Predicted) | Enteritidis | 1425  | 651   |
| SAL_EA1505AA | PNUSAS000695   | SRR2194102 | 2015 | 6  | North America | United States | Enteritidis             | Enteritidis | 1425  | 12315 |
| SAL_EA1506AA | PNUSAS000694   | SRR2194101 | 2015 | 7  | North America | United States | Enteritidis             | Enteritidis | 1425  | 12252 |
| SAL_EA1507AA | PNUSAS000693   | SRR2194089 |      |    | North America | United States | Enteritidis (Predicted) | Enteritidis | 1425  | 12314 |
| SAL_EA1508AA | PNUSAS000692   | SRR2194083 | 2015 | 7  | North America | United States | Enteritidis             | Enteritidis | 1425  | 12313 |
| SAL_EA1509AA | PNUSAS000691   | SRR2194074 | 2015 | 6  | North America | United States | Enteritidis             | Enteritidis | 1425  | 12312 |
| SAL_EA1510AA | PNUSAS000690   | SRR2194069 | 2015 | 6  | North America | United States | Enteritidis             | Enteritidis | 1425  | 12311 |
| SAL_EA1511AA | PNUSAS000689   | SRR2194064 | 2015 | 6  | North America | United States | Enteritidis             | Enteritidis | 1425  | 8925  |
| SAL_EA1512AA | PNUSAS000688   | SRR2194036 | 2015 | 6  | North America | United States | Enteritidis             | Enteritidis | 1425  | 12223 |
| SAL_EA1513AA | PNUSAS000687   | SRR2194029 | 2015 | 6  | North America | United States | Enteritidis             | Enteritidis | 1425  | 12310 |
| SAL_EA1514AA | PNUSAS000686   | SRR2194024 | 2015 | 6  | North America | United States | Enteritidis             | Enteritidis | 1425  | 12309 |
| SAL_EA1515AA | PNUSAS000582   | SRR2194023 | 2015 | 5  | North America | United States | Enteritidis             | Enteritidis | 1425  | 12308 |
| SAL_EA1516AA | PNUSAS000581   | SRR2194022 | 2015 | 4  | North America | United States | Enteritidis             | Enteritidis | 1425  | 12307 |
| SAL_EA1543AA | PNUSAS000755   | SRR2193907 | 2015 | 8  | North America | United States | Enteritidis             | Enteritidis | 1425  | 12280 |
| SAL_EA1544AA | PNUSAS000754   | SRR2193903 | 2015 | 8  | North America | United States | Enteritidis             | Enteritidis | 1425  | 12279 |
| SAL_EA1548AA | PNUSAS000753   | SRR2193806 | 2015 | 7  | North America | United States | Enteritidis             | Enteritidis | 1425  | 12275 |
| SAL_EA1560AA | PNUSAS000659   | SRR2192248 |      |    | North America | United States | Enteritidis (Predicted) | Enteritidis | 1425  | 12266 |
| SAL_EA1561AA | PNUSAS000614   | SRR2192247 |      |    | North America | United States | Enteritidis (Predicted) | Enteritidis | 1425  | 12265 |
| SAL_EA1564AA | PNUSAS000639   | SRR2192244 | 2015 | 5  | North America | United States | Enteritidis             | Enteritidis | 1425  | 12263 |
| SAL_EA1565AA | PNUSAS000463   | SRR2192243 | 2015 | 4  | North America | United States | Enteritidis             | Enteritidis | 1425  | 12262 |
| SAL_EA1566AA | PNUSAS000664   | SRR2192242 | 2015 | 6  | North America | United States | Enteritidis             | Enteritidis | 1425  | 12261 |
| SAL_EA1567AA | PNUSAS000646   | SRR2192241 | 2015 | 6  | North America | United States | Enteritidis             | Enteritidis | 1425  | 2690  |
| SAL_EA1568AA | PNUSAS000518   | SRR2192240 |      |    | North America | United States | Enteritidis (Predicted) | Enteritidis | 1425  | 12260 |



|              |              |            |      |   |               |               |                         |             |       |       |
|--------------|--------------|------------|------|---|---------------|---------------|-------------------------|-------------|-------|-------|
| SAL_EA1570AA | PNUSAS000651 | SRR2192235 | 2015 | 6 | North America | United States | Enteritidis             | Enteritidis | 1425  | 10152 |
| SAL_EA1571AA | PNUSAS000663 | SRR2192234 | 2015 | 6 | North America | United States | Enteritidis             | Enteritidis | 1425  | 12258 |
| SAL_EA1573AA | PNUSAS000660 | SRR2192199 | 2015 | 6 | North America | United States | Enteritidis             | Enteritidis | 1425  | 12257 |
| SAL_EA1574AA | PNUSAS000665 | SRR2192198 | 2015 | 6 | North America | United States | Enteritidis             | Enteritidis | 1425  | 12256 |
| SAL_EA1575AA | PNUSAS000662 | SRR2192197 | 2015 | 6 | North America | United States | Enteritidis             | Enteritidis | 1425  | 10709 |
| SAL_EA1576AA | PNUSAS000706 | SRR2192196 | 2015 | 7 | North America | United States | Enteritidis             | Enteritidis | 1425  | 12255 |
| SAL_EA1577AA | PNUSAS000642 | SRR2192195 | 2015 | 6 | North America | United States | Enteritidis             | Enteritidis | 1425  | 12254 |
| SAL_EA1578AA | PNUSAS000520 | SRR2192193 | 2015 | 6 | North America | United States | Enteritidis             | Enteritidis | 1425  | 12253 |
| SAL_EA1579AA | PNUSAS000661 | SRR2192192 | 2015 | 6 | North America | United States | Enteritidis             | Enteritidis | 1425  | 12252 |
| SAL_EA1580AA | PNUSAS000521 | SRR2192191 | 2015 | 6 | North America | United States | Enteritidis             | Enteritidis | 1425  | 12251 |
| SAL_EA1581AA | PNUSAS000618 | SRR2192190 | 2015 | 6 | North America | United States | Enteritidis             | Enteritidis | 1425  | 12250 |
| SAL_EA1582AA | PNUSAS000517 | SRR2192189 | 2015 | 5 | North America | United States | Enteritidis             | Enteritidis | 1425  | 12249 |
| SAL_EA1585AA | PNUSAS000650 | SRR2192186 | 2015 | 6 | North America | United States | Enteritidis             | Enteritidis | 1425  | 12247 |
| SAL_EA1586AA | PNUSAS000525 | SRR2192184 | 2015 | 6 | North America | United States | Enteritidis             | Enteritidis | 1425  | 12246 |
| SAL_EA1587AA | PNUSAS000668 | SRR2192183 | 2015 | 5 | North America | United States | Enteritidis             | Enteritidis | 1425  | 12245 |
| SAL_EA1588AA | PNUSAS000522 | SRR2192182 | 2015 | 6 | North America | United States | Enteritidis             | Enteritidis | 1425  | 12244 |
| SAL_EA1589AA | PNUSAS000666 | SRR2192181 | 2015 | 6 | North America | United States | Enteritidis             | Enteritidis | 1425  | 8925  |
| SAL_EA1590AA | PNUSAS000652 | SRR2192180 | 2015 | 6 | North America | United States | Enteritidis             | Enteritidis | 1425  | 12243 |
| SAL_EA1591AA | PNUSAS000648 | SRR2192179 | 2015 | 6 | North America | United States | Enteritidis             | Enteritidis | 1425  | 12242 |
| SAL_EA1592AA | PNUSAS000705 | SRR2192178 | 2015 | 7 | North America | United States | Enteritidis             | Enteritidis | 1425  | 12241 |
| SAL_EA1593AA | PNUSAS000523 | SRR2192177 | 2015 | 6 | North America | United States | Enteritidis             | Enteritidis | 1425  | 12240 |
| SAL_EA1594AA | PNUSAS000654 | SRR2192176 | 2015 | 6 | North America | United States | Enteritidis             | Enteritidis | 1425  | 12239 |
| SAL_EA1595AA | PNUSAS000526 | SRR2192175 | 2015 | 6 | North America | United States | Enteritidis             | Enteritidis | 1425  | 12238 |
| SAL_EA1596AA | PNUSAS000636 | SRR2192174 | 2015 | 5 | North America | United States | Enteritidis             | Enteritidis | 1425  | 10183 |
| SAL_EA1597AA | PNUSAS000524 | SRR2192173 | 2015 | 6 | North America | United States | Enteritidis             | Enteritidis | 1425  | 12237 |
| SAL_EA1598AA | PNUSAS000640 | SRR2192172 | 2015 | 5 | North America | United States | Enteritidis             | Enteritidis | 1425  | 2067  |
| SAL_EA1599AA | PNUSAS000644 | SRR2192171 | 2015 | 6 | North America | United States | Enteritidis             | Enteritidis | 1425  | 2067  |
| SAL_EA1600AA | PNUSAS000645 | SRR2192170 | 2015 | 5 | North America | United States | Enteritidis             | Enteritidis | 1425  | 10183 |
| SAL_EA1601AA | PNUSAS000704 | SRR2192169 | 2015 | 7 | North America | United States | Enteritidis             | Enteritidis | 1425  | 12236 |
| SAL_EA1602AA | PNUSAS000481 | SRR2192168 | 2015 | 5 | North America | United States | Enteritidis             | Enteritidis | 1425  | 12235 |
| SAL_EA1605AA | PNUSAS000669 | SRR2192146 | 2015 | 6 | North America | United States | Enteritidis             | Enteritidis | 1425  | 12232 |
| SAL_EA1606AA | PNUSAS000649 | SRR2192145 | 2015 | 6 | North America | United States | Enteritidis             | Enteritidis | 1425  | 12231 |
| SAL_EA1607AA | PNUSAS000482 | SRR2192144 | 2015 | 5 | North America | United States | Enteritidis             | Enteritidis | 1425  | 12230 |
| SAL_EA1608AA | PNUSAS000655 | SRR2192143 | 2015 | 6 | North America | United States | Enteritidis             | Enteritidis | 1425  | 12229 |
| SAL_EA1609AA | PNUSAS000656 | SRR2192142 | 2015 | 6 | North America | United States | Enteritidis             | Enteritidis | 1425  | 12228 |
| SAL_EA1610AA | PNUSAS000513 | SRR2192141 | 2015 | 5 | North America | United States | Enteritidis             | Enteritidis | 1425  | 12227 |
| SAL_EA1611AA | PNUSAS000638 | SRR2192140 | 2015 | 5 | North America | United States | Enteritidis             | Enteritidis | 1425  | 10152 |
| SAL_EA1613AA | PNUSAS000615 | SRR2192138 | 2015 | 5 | North America | United States | Enteritidis             | Enteritidis | 1425  | 12226 |
| SAL_EA1614AA | PNUSAS000515 | SRR2192137 | 2015 | 5 | North America | United States | Enteritidis             | Enteritidis | 1425  | 12225 |
| SAL_EA1616AA | PNUSAS000653 | SRR2192135 | 2015 | 6 | North America | United States | Enteritidis             | Enteritidis | 1425  | 12223 |
| SAL_EA1617AA | PNUSAS000476 | SRR2192134 | 2015 | 5 | North America | United States | Enteritidis             | Enteritidis | 1425  | 12222 |
| SAL_EA1618AA | PNUSAS000641 | SRR2192133 | 2015 | 6 | North America | United States | Enteritidis             | Enteritidis | 1425  | 12221 |
| SAL_EA1620AA | PNUSAS000657 | SRR2192131 | 2015 | 6 | North America | United States | Enteritidis             | Enteritidis | 1425  | 12219 |
| SAL_EA1621AA | PNUSAS000516 | SRR2192130 | 2015 | 5 | North America | United States | Enteritidis (Predicted) | Enteritidis | 1425  | 12218 |
| SAL_EA1622AA | PNUSAS000479 | SRR2192129 | 2015 | 5 | North America | United States | Enteritidis             | Enteritidis | 1425  | 12217 |
| SAL_EA1623AA | PNUSAS000477 | SRR2192128 | 2015 | 5 | North America | United States | Enteritidis             | Enteritidis | 27901 | 12216 |
| SAL_EA1624AA | PNUSAS000472 | SRR2192127 | 2015 | 3 | North America | United States | Enteritidis             | Enteritidis | 1425  | 12215 |
| SAL_EA1625AA | PNUSAS000475 | SRR2192126 | 2015 | 5 | North America | United States | Enteritidis             | Enteritidis | 1425  | 12214 |
| SAL_EA1626AA | PNUSAS000647 | SRR2192125 | 2015 | 6 | North America | United States | Enteritidis             | Enteritidis | 1425  | 12213 |
| SAL_EA1627AA | PNUSAS000473 | SRR2192124 | 2015 | 5 | North America | United States | Enteritidis             | Enteritidis | 8003  | 12205 |
| SAL_EA1628AA | PNUSAS000478 | SRR2192123 |      |   | North America | United States | Enteritidis (Predicted) | Enteritidis | 8003  | 12205 |
| SAL_EA1629AA | PNUSAS000471 | SRR2192122 |      |   | North America | United States | Enteritidis (Predicted) | Enteritidis | 1425  | 12212 |
| SAL_EA1630AA | PNUSAS000470 | SRR2192121 |      |   | North America | United States | Enteritidis (Predicted) | Enteritidis | 1425  | 12211 |
| SAL_EA1632AA | PNUSAS000474 | SRR2192119 | 2015 | 5 | North America | United States | Enteritidis             | Enteritidis | 1425  | 12209 |
| SAL_EA1633AA | PNUSAS000460 | SRR2192118 |      |   | North America | United States | Enteritidis (Predicted) | Enteritidis | 1425  | 12208 |
| SAL_EA1634AA | PNUSAS000480 | SRR2192117 |      |   | North America | United States | Enteritidis (Predicted) | Enteritidis | 1425  | 12207 |
| SAL_EA1635AA | PNUSAS000514 | SRR2192116 | 2015 | 5 | North America | United States | Enteritidis             | Enteritidis | 1425  | 12206 |
| SAL_EA1636AA | PNUSAS000583 | SRR2192115 |      |   | North America | United States | Enteritidis (Predicted) | Enteritidis | 8003  | 12205 |
| SAL_EA1637AA | PNUSAS000469 | SRR2192114 | 2015 | 5 | North America | United States | Enteritidis             | Enteritidis | 1425  | 12204 |



|              |              |            |      |   |               |               |                         |             |       |       |
|--------------|--------------|------------|------|---|---------------|---------------|-------------------------|-------------|-------|-------|
| SAL_EA1775AA | ASM_04       | SRR2352188 | 2015 |   | North America | United States | Enteritidis (Predicted) | Enteritidis | 1425  | 12102 |
| SAL_EA1776AA | ASM_03       | SRR2352187 | 2015 |   | North America | United States | Enteritidis (Predicted) | Enteritidis | 1425  | 12101 |
| SAL_EA1777AA | ASM_02       | SRR2352186 | 2015 |   | North America | United States | Enteritidis (Predicted) | Enteritidis | 1425  | 12100 |
| SAL_EA1778AA | ASM_01       | SRR2352185 | 2015 |   | North America | United States | Enteritidis (Predicted) | Enteritidis | 1425  | 12099 |
| SAL_EA1793AA | FSIS1503901  | SRR2353818 | 2015 |   | North America | United States | Enteritidis             | Enteritidis | 1425  | 12092 |
| SAL_EA1804AA | 2015K-0901   | SRR2401921 |      |   | North America | United States | Enteritidis (Predicted) | Enteritidis | 1425  | 8925  |
| SAL_EA1813AA | PNUSA5000487 | SRR2401912 | 2015 | 5 | North America | United States | Enteritidis             | Enteritidis | 1425  | 12080 |
| SAL_EA1815AA | PNUSA5000295 | SRR2401910 |      |   | North America | United States | Enteritidis (Predicted) | Enteritidis | 1425  | 12078 |
| SAL_EA1816AA | FSIS1504079  | SRR2396740 | 2015 |   | North America | United States | Enteritidis             | Enteritidis | 1425  | 12077 |
| SAL_EA1818AA | FSIS1504004  | SRR2396658 | 2015 |   | North America | United States | Enteritidis             | Enteritidis | 1425  | 12075 |
| SAL_EA1819AA | FSIS1504006  | SRR2396594 | 2015 |   | North America | United States | Enteritidis             | Enteritidis | 1425  | 10709 |
| SAL_EA1820AA | FSIS1504078  | SRR2396593 | 2015 |   | North America | United States | Enteritidis             | Enteritidis | 1425  | 12074 |
| SAL_EA1829AA | FSIS1504080  | SRR2396521 | 2015 |   | North America | United States | Enteritidis             | Enteritidis | 1425  | 12068 |
| SAL_EA1837AA | FSIS1503965  | SRR2395755 | 2015 |   | North America | United States | Enteritidis             | Enteritidis | 1425  | 12060 |
| SAL_EA1881AA | CVM N55398   | SRR2407798 | 2014 |   | North America | United States | Enteritidis             | Enteritidis | 1425  | 11919 |
| SAL_EA1898AA | CVM N55381   | SRR2407781 | 2014 |   | North America | United States | Enteritidis             | Enteritidis | 1425  | 12015 |
| SAL_EA1921AA | CVM N54742   | SRR2407758 | 2014 |   | North America | United States | Enteritidis             | Enteritidis | 1425  | 11993 |
| SAL_EA1927AA | CVM N54736   | SRR2407752 | 2014 |   | North America | United States | Enteritidis             | Enteritidis | 1425  | 11989 |
| SAL_EA1947AA | CVM N54716   | SRR2407732 | 2014 |   | North America | United States | Enteritidis             | Enteritidis | 1425  | 11972 |
| SAL_EA1950AA | CVM N54713   | SRR2407729 | 2014 |   | North America | United States | Enteritidis             | Enteritidis | 1425  | 11970 |
| SAL_EA1951AA | CVM N54712   | SRR2407728 | 2014 |   | North America | United States | Enteritidis             | Enteritidis | 1425  | 11969 |
| SAL_EA1957AA | CVM N54706   | SRR2407722 | 2014 |   | North America | United States | Enteritidis             | Enteritidis | 1425  | 11963 |
| SAL_EA1975AA | CVM N54278   | SRR2407704 | 2014 |   | North America | United States | Enteritidis             | Enteritidis | 1425  | 11947 |
| SAL_EA1976AA | CVM N54277   | SRR2407703 | 2014 |   | North America | United States | Enteritidis             | Enteritidis | 1425  | 11946 |
| SAL_EA1981AA | CVM N54272   | SRR2407698 | 2014 |   | North America | United States | Enteritidis             | Enteritidis | 1425  | 11941 |
| SAL_EA2004AA | CVM N53843   | SRR2407675 | 2014 |   | North America | United States | Enteritidis             | Enteritidis | 1425  | 11919 |
| SAL_EA2027AA | CVM N53077   | SRR2407652 | 2014 |   | North America | United States | Enteritidis             | Enteritidis | 1425  | 11896 |
| SAL_EA2029AA | CVM N53075   | SRR2407650 | 2014 |   | North America | United States | Enteritidis             | Enteritidis | 8003  | 11894 |
| SAL_EA2050AA | CVM N53053   | SRR2407629 | 2014 |   | North America | United States | Enteritidis             | Enteritidis | 1425  | 11873 |
| SAL_EA2051AA | CVM N53052   | SRR2407628 | 2014 |   | North America | United States | Enteritidis             | Enteritidis | 1425  | 11872 |
| SAL_EA2052AA | CVM N53051   | SRR2407627 | 2014 |   | North America | United States | I 4,5,12: I :-          | Enteritidis | 1425  | 11871 |
| SAL_EA2055AA | CVM N53048   | SRR2407624 | 2014 |   | North America | United States | Enteritidis             | Enteritidis | 1425  | 11869 |
| SAL_EA2062AA | CVM N53041   | SRR2407617 | 2014 |   | North America | United States | Enteritidis             | Enteritidis | 27904 | 11863 |
| SAL_EA2080AA | CVM N53022   | SRR2407599 | 2014 |   | North America | United States | Schwarzengrund          | Enteritidis | 8003  | 11846 |
| SAL_EA2096AA | CVM N52062   | SRR2407583 | 2014 |   | North America | United States | Enteritidis             | Enteritidis | 1425  | 11830 |
| SAL_EA2097AA | CVM N52061   | SRR2407582 | 2014 |   | North America | United States | Enteritidis             | Enteritidis | 1425  | 11829 |
| SAL_EA2107AA | CVM N52051   | SRR2407572 | 2014 |   | North America | United States | Enteritidis             | Enteritidis | 1425  | 11820 |
| SAL_EA2140AA | CVM N52018   | SRR2407539 | 2014 |   | North America | United States | Enteritidis             | Enteritidis | 1425  | 11788 |
| SAL_EA2141AA | CVM N52017   | SRR2407538 | 2014 |   | North America | United States | Enteritidis             | Enteritidis | 1425  | 11787 |
| SAL_EA2142AA | CVM N52016   | SRR2407537 | 2014 |   | North America | United States | Enteritidis             | Enteritidis | 1425  | 11786 |
| SAL_EA2240AA | FSIS1504440  | SRR2483569 | 2015 |   | North America | United States | Enteritidis             | Enteritidis | 1425  | 11707 |
| SAL_EA2245AA | FSIS1504441  | SRR2483564 | 2015 |   | North America | United States | Enteritidis             | Enteritidis | 26166 | 11703 |
| SAL_EA2247AA | FSIS1504405  | SRR2482983 | 2015 |   | North America | United States | Enteritidis             | Enteritidis | 8003  | 11701 |
| SAL_EA2248AA | FSIS1504285  | SRR2482982 | 2015 |   | North America | United States | Enteritidis             | Enteritidis | 1425  | 11699 |
| SAL_EA2249AA | FSIS1504284  | SRR2482981 | 2015 |   | North America | United States | Enteritidis             | Enteritidis | 1425  | 11699 |
| SAL_EA2250AA | FSIS1504219  | SRR2482980 | 2015 |   | North America | United States | Enteritidis             | Enteritidis | 1425  | 11700 |
| SAL_EA2251AA | FSIS1504283  | SRR2482979 | 2015 |   | North America | United States | Enteritidis             | Enteritidis | 1425  | 11699 |
| SAL_EA2252AA | FSIS1504281  | SRR2482977 | 2015 |   | North America | United States | Enteritidis             | Enteritidis | 1425  | 11699 |
| SAL_EA2253AA | FSIS1504403  | SRR2482976 | 2015 |   | North America | United States | Enteritidis             | Enteritidis | 8003  | 11698 |
| SAL_EA2281AA | FSIS1504501  | SRR2537090 | 2015 |   | North America | United States | Enteritidis             | Enteritidis | 1425  | 11696 |
| SAL_EA2282AA | FSIS1504091  | SRR2537089 | 2015 |   | North America | United States | Enteritidis             | Enteritidis | 1425  | 11695 |
| SAL_EA2283AA | FSIS1504099  | SRR2537088 | 2015 |   | North America | United States | Enteritidis             | Enteritidis | 1425  | 11695 |
| SAL_EA2291AA | PNUSA5000805 | SRR2533165 |      |   | North America | United States | Enteritidis (Predicted) | Enteritidis | 1425  | 11692 |
| SAL_EA2293AA | PNUSA5000836 | SRR2533163 |      |   | North America | United States | Enteritidis (Predicted) | Enteritidis | 1425  | 11255 |
| SAL_EA2294AA | PNUSA5000835 | SRR2533162 | 2015 | 8 | North America | United States | Enteritidis             | Enteritidis | 1425  | 11691 |
| SAL_EA2295AA | PNUSA5000834 | SRR2533161 | 2015 | 7 | North America | United States | Enteritidis             | Enteritidis | 1425  | 11690 |
| SAL_EA2296AA | PNUSA5000833 | SRR2533160 |      |   | North America | United States | Enteritidis (Predicted) | Enteritidis | 1425  | 11689 |
| SAL_EA2310AA | FSIS1504536  | SRR2532683 | 2015 |   | North America | United States | Enteritidis             | Enteritidis | 1425  | 11680 |
| SAL_EA2311AA | FSIS1504537  | SRR2532682 | 2015 |   | North America | United States | Enteritidis             | Enteritidis | 1425  | 11679 |

|              |                  |            |      |    |               |               |                         |             |       |       |
|--------------|------------------|------------|------|----|---------------|---------------|-------------------------|-------------|-------|-------|
| SAL_EA2349AA | VA-WGS-00602     | SRR2542489 | 2008 |    | North America | United States | Enteritidis             | Enteritidis | 1425  | 11650 |
| SAL_EA2423AA | FDA00000460      | SRR2534124 | 2003 | 7  | North America | Mexico        | Enteritidis             | Enteritidis | 1425  | 11587 |
| SAL_EA2539AA | E2015012816      | SRR2533570 | 2015 | 9  | North America | United States | Enteritidis             | Enteritidis | 1425  | 11502 |
| SAL_EA2540AA | E2015012699      | SRR2533569 | 2015 | 9  | North America | United States | Enteritidis             | Enteritidis | 1425  | 11501 |
| SAL_EA2541AA | E2015012695      | SRR2533568 | 2015 | 9  | North America | United States | Enteritidis             | Enteritidis | 1425  | 11500 |
| SAL_EA2566AA | CVM-N15804       | SRR2568392 | 2007 |    | North America | United States | Enteritidis             | Enteritidis | 1425  | 11476 |
| SAL_EA2573AA | CVM-N15781       | SRR2599656 | 2007 |    | North America | United States | Enteritidis             | Enteritidis | 26678 | 11470 |
| SAL_EA2583AA | E2015011742      | SRR2533513 | 2015 | 8  | North America | United States | Enteritidis             | Enteritidis | 1425  | 11460 |
| SAL_EA2584AA | E2015011741      | SRR2533512 | 2015 | 8  | North America | United States | Enteritidis             | Enteritidis | 1425  | 11460 |
| SAL_EA2585AA | E2015011740      | SRR2533511 | 2015 | 8  | North America | United States | Enteritidis             | Enteritidis | 1425  | 11460 |
| SAL_EA2586AA | E2015011853      | SRR2533509 | 2015 | 8  | North America | United States | Enteritidis             | Enteritidis | 1425  | 11456 |
| SAL_EA2587AA | E2015011730      | SRR2533508 | 2015 | 8  | North America | United States | Enteritidis             | Enteritidis | 1425  | 11459 |
| SAL_EA2588AA | E2015011528      | SRR2533506 | 2015 | 8  | North America | United States | Enteritidis             | Enteritidis | 1425  | 11458 |
| SAL_EA2589AA | E2015011381      | SRR2533505 | 2015 | 8  | North America | United States | Enteritidis             | Enteritidis | 1425  | 11457 |
| SAL_EA2590AA | E2015011355      | SRR2533504 | 2015 | 8  | North America | United States | Enteritidis             | Enteritidis | 1425  | 11456 |
| SAL_EA2591AA | E2015012226      | SRR2533503 | 2015 | 8  | North America | United States | Enteritidis             | Enteritidis | 1425  | 11455 |
| SAL_EA2592AA | E2015012170      | SRR2533501 | 2015 | 8  | North America | United States | Enteritidis             | Enteritidis | 1425  | 11454 |
| SAL_EA2593AA | E2015012162      | SRR2533500 | 2015 | 8  | North America | United States | Enteritidis             | Enteritidis | 1425  | 11453 |
| SAL_EA2594AA | E2015012057      | SRR2533499 | 2015 | 8  | North America | United States | Enteritidis             | Enteritidis | 1425  | 11452 |
| SAL_EA2595AA | E2015012021      | SRR2533498 | 2015 | 8  | North America | United States | Enteritidis             | Enteritidis | 1425  | 11451 |
| SAL_EA2596AA | E2015011911      | SRR2533497 | 2015 | 8  | North America | United States | Enteritidis             | Enteritidis | 1425  | 11450 |
| SAL_EA2598AA | E2015012606      | SRR2533494 | 2015 | 9  | North America | United States | Enteritidis             | Enteritidis | 1425  | 11448 |
| SAL_EA2599AA | E2015012441      | SRR2533493 | 2015 | 8  | North America | United States | Enteritidis             | Enteritidis | 1425  | 11447 |
| SAL_EA2632AA | WAPHL_SAL-A00845 | SRR2533321 | 2006 |    | North America | United States | Enteritidis             | Enteritidis | 1425  | 11422 |
| SAL_EA2653AA | WAPHL_SAL-A00882 | SRR2532787 | 2006 |    | North America | United States | Enteritidis             | Enteritidis | 1425  | 11405 |
| SAL_EA2683AA | VA-WGS-00584     | SRR2533380 | 2008 |    | North America | United States | Enteritidis             | Enteritidis | 1425  | 11162 |
| SAL_EA2687AA | VA-WGS-00585     | SRR2532717 | 2008 |    | North America | United States | Enteritidis             | Enteritidis | 1425  | 11380 |
| SAL_EA2741AA | CVM-N15254       | SRR2532635 | 2007 |    | North America | United States | Enteritidis             | Enteritidis | 1425  | 11335 |
| SAL_EA2762AA | CVM-N15755       | SRR2533455 | 2007 |    | North America | United States | Enteritidis             | Enteritidis | 1425  | 11316 |
| SAL_EA2777AA | PNUSAS001020     | SRR2601072 |      |    | North America | United States | Enteritidis (Predicted) | Enteritidis | 1425  | 180   |
| SAL_EA2778AA | PNUSAS001019     | SRR2601070 |      |    | North America | United States | Enteritidis (Predicted) | Enteritidis | 1425  | 11303 |
| SAL_EA2779AA | PNUSAS001021     | SRR2601069 |      |    | North America | United States | Enteritidis (Predicted) | Enteritidis | 1425  | 11302 |
| SAL_EA2822AA | PNUSAS000976     | SRR2586132 | 2015 | 8  | North America | United States | Enteritidis             | Enteritidis | 1425  | 11263 |
| SAL_EA2824AA | PNUSAS000975     | SRR2586121 | 2015 | 8  | North America | United States | Enteritidis             | Enteritidis | 1425  | 11261 |
| SAL_EA2826AA | PNUSAS000974     | SRR2586076 | 2015 | 8  | North America | United States | Enteritidis             | Enteritidis | 1425  | 11259 |
| SAL_EA2829AA | PNUSAS000973     | SRR2586029 |      |    | North America | United States | Enteritidis (Predicted) | Enteritidis | 1425  | 11255 |
| SAL_EA2831AA | PNUSAS000972     | SRR2586028 | 2015 | 8  | North America | United States | Enteritidis             | Enteritidis | 1425  | 11255 |
| SAL_EA2835AA | FDA00000365      | SRR2586123 | 2003 | 1  | Asia          | China         | Enteritidis             | Enteritidis | 1425  | 11253 |
| SAL_EA2894AA | FDA00004254      | SRR2585504 | 2013 | 12 | Asia          | China         | Enteritidis             | Enteritidis | 1425  | 11205 |
| SAL_EA2898AA | PNUSAS000962     | SRR2585485 | 2015 | 9  | North America | United States | Enteritidis             | Enteritidis | 1425  | 5380  |
| SAL_EA2900AA | PNUSAS000960     | SRR2585484 | 2015 | 8  | North America | United States | Enteritidis (Predicted) | Enteritidis | 1425  | 5380  |
| SAL_EA2925AA | FDA00004166      | SRR2585443 | 2013 | 5  | North America | United States | Enteritidis (Predicted) | Enteritidis | 1425  | 11179 |
| SAL_EA2926AA | FDA00004167      | SRR2585442 | 2013 | 5  | North America | United States | Enteritidis (Predicted) | Enteritidis | 1425  | 11179 |
| SAL_EA2927AA | FDA00004168      | SRR2585441 | 2013 | 5  | North America | United States | Enteritidis (Predicted) | Enteritidis | 1425  | 11179 |
| SAL_EA2950AA | VA-WGS-00587     | SRR2648191 | 2008 |    | North America | United States | Enteritidis             | Enteritidis | 1425  | 11162 |
| SAL_EA2960AA | CVM-N16404       | SRR2584392 | 2008 |    | North America | United States | Enteritidis             | Enteritidis | 1425  | 11154 |
| SAL_EA2968AA | E2015013122      | SRR2584383 | 2015 | 9  | North America | United States | Enteritidis             | Enteritidis | 26543 | 11146 |
| SAL_EA2969AA | E2015013115      | SRR2584382 | 2015 | 9  | North America | United States | Enteritidis             | Enteritidis | 1425  | 11145 |
| SAL_EA2970AA | E2015013177      | SRR2584381 | 2015 | 9  | North America | United States | Enteritidis             | Enteritidis | 27901 | 11144 |
| SAL_EA2981AA | CVM-N16429       | SRR2583957 | 2008 |    | North America | United States | Enteritidis             | Enteritidis | 1425  | 11135 |
| SAL_EA2983AA | CVM-N16428       | SRR2583955 | 2008 |    | North America | United States | Enteritidis             | Enteritidis | 1425  | 11133 |
| SAL_EA3050AA | WAPHL_SAL-A00941 | SRR2648211 | 2015 | 9  | North America | United States | Enteritidis             | Enteritidis | 1425  | 11077 |
| SAL_EA3051AA | WAPHL_SAL-A00940 | SRR2648209 | 2015 | 9  | North America | United States | Enteritidis             | Enteritidis | 1425  | 11076 |
| SAL_EA3052AA | WAPHL_SAL-A00939 | SRR2648208 | 2015 | 9  | North America | United States | Enteritidis             | Enteritidis | 1425  | 11075 |
| SAL_EA3053AA | WAPHL_SAL-A00938 | SRR2648207 | 2015 | 9  | North America | United States | Enteritidis             | Enteritidis | 1425  | 11074 |
| SAL_EA3054AA | WAPHL_SAL-A00937 | SRR2648206 | 2015 | 8  | North America | United States | Enteritidis             | Enteritidis | 1425  | 11073 |
| SAL_EA3067AA | E2015014375      | SRR2724349 | 2015 | 10 | North America | United States | Enteritidis             | Enteritidis | 1425  | 11061 |
| SAL_EA3068AA | E2015014301      | SRR2724348 | 2015 | 10 | North America | United States | Enteritidis             | Enteritidis | 1425  | 11060 |
| SAL_EA3069AA | E2015014267      | SRR2724329 | 2015 | 10 | North America | United States | Enteritidis             | Enteritidis | 27904 | 11059 |

|              |                           |            |      |    |               |               |                         |             |       |       |
|--------------|---------------------------|------------|------|----|---------------|---------------|-------------------------|-------------|-------|-------|
| SAL_EA3070AA | E2015014162               | SRR2724318 | 2015 | 9  | North America | United States | Enteritidis             | Enteritidis | 1425  | 11058 |
| SAL_EA3071AA | E2015014140               | SRR2724298 | 2015 | 9  | North America | United States | Enteritidis             | Enteritidis | 26543 | 11057 |
| SAL_EA3072AA | E2015013963               | SRR2724297 | 2015 | 9  | North America | United States | Enteritidis             | Enteritidis | 1425  | 11056 |
| SAL_EA3129AA | MDA113268                 | SRR2671588 | 2011 | 10 | North America | United States | Enteritidis             | Enteritidis | 1425  | 11004 |
| SAL_EA3130AA | MDA113267                 | SRR2671587 | 2011 | 10 | North America | United States | Enteritidis             | Enteritidis | 1425  | 11005 |
| SAL_EA3131AA | MDA113269                 | SRR2671568 | 2011 | 10 | North America | United States | Enteritidis             | Enteritidis | 1425  | 11004 |
| SAL_EA3159AA | CVM-N15822                | SRR2670711 | 2007 |    | North America | United States | Enteritidis             | Enteritidis | 1425  | 10986 |
| SAL_EA3162AA | CVM-N15828                | SRR2670708 | 2007 |    | North America | United States | Enteritidis             | Enteritidis | 1425  | 10983 |
| SAL_EA3165AA | CVM-N15819                | SRR2670705 | 2007 |    | North America | United States | Enteritidis             | Enteritidis | 1425  | 10980 |
| SAL_EA3177AA | CVM-N16413                | SRR2670691 | 2008 |    | North America | United States | Enteritidis             | Enteritidis | 1425  | 10972 |
| SAL_EA3195AA | CVM-N16445                | SRR2669159 | 2008 |    | North America | United States | Enteritidis             | Enteritidis | 1425  | 10956 |
| SAL_EA3196AA | CVM-N16444                | SRR2669158 | 2008 |    | North America | United States | Enteritidis             | Enteritidis | 1425  | 10957 |
| SAL_EA3298AA | 2015K-1102                | SRR2748728 | 2015 | 7  | North America | United States | Enteritidis             | Enteritidis | 1425  | 10874 |
| SAL_EA3299AA | 2015K-1101                | SRR2748727 | 2015 | 8  | North America | United States | Enteritidis             | Enteritidis | 1425  | 10873 |
| SAL_EA3300AA | 2015K-1100                | SRR2748726 | 2015 | 7  | North America | United States | Enteritidis             | Enteritidis | 1425  | 10872 |
| SAL_EA3309AA | PNUSAS001071              | SRR2748709 |      |    | North America | United States | Enteritidis             | Enteritidis | 1425  | 10865 |
| SAL_EA3347AA | BS_13000-sc-2322490       | ERR1082915 |      |    |               |               | Enteritidis (Predicted) | Enteritidis | 1425  | 10852 |
| SAL_EA3357AA | BS_08037-sc-2322480       | ERR1082905 |      |    |               |               | Enteritidis (Predicted) | Enteritidis | 1425  | 10845 |
| SAL_EA3358AA | BS_08849-sc-2322479       | ERR1082904 |      |    |               |               | Enteritidis (Predicted) | Enteritidis | 1425  | 10845 |
| SAL_EA3361AA | BS_22197-sc-2322476       | ERR1082901 |      |    |               |               | Enteritidis (Predicted) | Enteritidis | 1425  | 41057 |
| SAL_EA3375AA | BS_22784-sc-2322462       | ERR1082887 |      |    |               |               | Enteritidis (Predicted) | Enteritidis | 1425  | 10831 |
| SAL_EA3377AA | BS_22400-sc-2322460       | ERR1082885 |      |    |               |               | Enteritidis (Predicted) | Enteritidis | 1425  | 10831 |
| SAL_EA3404AA | BN_7275-sc-2322433        | ERR1082858 |      |    |               |               | Enteritidis (Predicted) | Enteritidis | 1425  | 6101  |
| SAL_EA3409AA | BS_21887-sc-2322428       | ERR1082853 |      |    |               |               | Enteritidis (Predicted) | Enteritidis | 1425  | 10805 |
| SAL_EA3413AA | BS_19536-sc-2322424       | ERR1082849 |      |    |               |               | Enteritidis (Predicted) | Enteritidis | 1425  | 10802 |
| SAL_EA3414AA | BS_10338-sc-2322423       | ERR1082848 |      |    |               |               | Enteritidis (Predicted) | Enteritidis | 1425  | 6101  |
| SAL_EA3421AA | ATCC_13076__ve_control-sc | ERR1082841 |      |    |               |               | Enteritidis (Predicted) | Enteritidis | 1425  | 41062 |
| SAL_EA3422AA | ATCC_13076_control-sc-232 | ERR1082840 |      |    |               |               | Enteritidis (Predicted) | Enteritidis | 1425  | 41062 |
| SAL_EA3423AA | BS_10167-sc-2322394       | ERR1082839 |      |    |               |               | Enteritidis (Predicted) | Enteritidis | 1425  | 10794 |
| SAL_EA3427AA | BS_7944-sc-2322390        | ERR1082835 |      |    |               |               | Enteritidis (Predicted) | Enteritidis | 1425  | 10790 |
| SAL_EA3430AA | BS_6913-sc-2322387        | ERR1082832 |      |    |               |               | Enteritidis (Predicted) | Enteritidis | 1425  | 6101  |
| SAL_EA3433AA | BS_7276-sc-2322384        | ERR1082829 |      |    |               |               | Enteritidis (Predicted) | Enteritidis | 1425  | 6101  |
| SAL_EA3434AA | BS_12051-sc-2322383       | ERR1082828 |      |    |               |               | Enteritidis (Predicted) | Enteritidis | 1425  | 6101  |
| SAL_EA3446AA | BS_15208-sc-2322369       | ERR1082816 |      |    |               |               | Enteritidis (Predicted) | Enteritidis | 1425  | 10778 |
| SAL_EA3447AA | BS_14449-sc-2322368       | ERR1082815 |      |    |               |               | Enteritidis (Predicted) | Enteritidis | 1425  | 6102  |
| SAL_EA3449AA | BS_13139-sc-2322366       | ERR1082813 |      |    |               |               | Enteritidis (Predicted) | Enteritidis | 1425  | 10775 |
| SAL_EA3450AA | BS_14756-sc-2322365       | ERR1082812 |      |    |               |               | Enteritidis (Predicted) | Enteritidis | 1425  | 6102  |
| SAL_EA3451AA | BS_07198-sc-2322363       | ERR1082811 |      |    |               |               | Enteritidis (Predicted) | Enteritidis | 1425  | 6101  |
| SAL_EA3452AA | BS_07768-sc-2322362       | ERR1082810 |      |    |               |               | Enteritidis (Predicted) | Enteritidis | 1425  | 10790 |
| SAL_EA3453AA | BS_09728-sc-2322361       | ERR1082809 |      |    |               |               | Enteritidis (Predicted) | Enteritidis | 1425  | 10772 |
| SAL_EA3454AA | BS_07045-sc-2322360       | ERR1082808 |      |    |               |               | Enteritidis (Predicted) | Enteritidis | 1425  | 41081 |
| SAL_EA3455AA | BS_07998-sc-2322359       | ERR1082807 |      |    |               |               | Enteritidis (Predicted) | Enteritidis | 1425  | 6101  |
| SAL_EA3456AA | BS_8257-sc-2322358        | ERR1082806 |      |    |               |               | Enteritidis (Predicted) | Enteritidis | 1425  | 6101  |
| SAL_EA3458AA | BS_07810-sc-2322356       | ERR1082804 |      |    |               |               | Enteritidis (Predicted) | Enteritidis | 1425  | 6101  |
| SAL_EA3460AA | BS_08179-sc-2322354       | ERR1082802 |      |    |               |               | Enteritidis (Predicted) | Enteritidis | 1425  | 41415 |
| SAL_EA3461AA | BS_06278-sc-2322353       | ERR1082801 |      |    |               |               | Enteritidis (Predicted) | Enteritidis | 1425  | 10767 |
| SAL_EA3463AA | BS_06376-sc-2322351       | ERR1082799 |      |    |               |               | Enteritidis (Predicted) | Enteritidis | 1425  | 6101  |
| SAL_EA3465AA | BS_06406-sc-2322349       | ERR1082797 |      |    |               |               | Enteritidis (Predicted) | Enteritidis | 1425  | 6101  |
| SAL_EA3467AA | BS_07052-sc-2322347       | ERR1082795 |      |    |               |               | Enteritidis (Predicted) | Enteritidis | 1425  | 6101  |
| SAL_EA3468AA | BS_08071-sc-2322346       | ERR1082794 |      |    |               |               | Enteritidis (Predicted) | Enteritidis | 1425  | 10845 |
| SAL_EA3471AA | BS_06418-sc-2322343       | ERR1082791 |      |    |               |               | Enteritidis (Predicted) | Enteritidis | 1425  | 6101  |
| SAL_EA3472AA | BS_6436-sc-2322342        | ERR1082790 |      |    |               |               | Enteritidis (Predicted) | Enteritidis | 1425  | 6101  |
| SAL_EA3474AA | BS_06252-sc-2322339       | ERR1082788 |      |    |               |               | Enteritidis (Predicted) | Enteritidis | 1425  | 6101  |
| SAL_EA3477AA | BS_06670-sc-2322336       | ERR1082785 |      |    |               |               | Enteritidis (Predicted) | Enteritidis | 1425  | 6101  |
| SAL_EA3478AA | BS_06254-sc-2322335       | ERR1082784 |      |    |               |               | Enteritidis (Predicted) | Enteritidis | 1425  | 6101  |
| SAL_EA3481AA | BS_06616-sc-2322332       | ERR1082781 |      |    |               |               | Enteritidis (Predicted) | Enteritidis | 1425  | 10752 |
| SAL_EA3483AA | BS_06444-sc-2322330       | ERR1082779 |      |    |               |               | Enteritidis (Predicted) | Enteritidis | 1425  | 6101  |
| SAL_EA3484AA | BS_03828-sc-2322329       | ERR1082778 |      |    |               |               | Enteritidis (Predicted) | Enteritidis | 1425  | 10749 |
| SAL_EA3516AA | E2015014785               | SRR2759018 | 2015 | 10 | North America | United States | Enteritidis (Predicted) | Enteritidis | 1425  | 10717 |

|              |             |            |      |    |               |               |                         |             |       |       |
|--------------|-------------|------------|------|----|---------------|---------------|-------------------------|-------------|-------|-------|
| SAL_EA3517AA | E2015014738 | SRR2759017 | 2015 | 10 | North America | United States | Enteritidis (Predicted) | Enteritidis | 1425  | 10716 |
| SAL_EA3526AA | FSIS1504786 | SRR2778072 | 2015 |    | North America | United States | Enteritidis             | Enteritidis | 1425  | 10709 |
| SAL_EA3528AA | FSIS1504787 | SRR2778060 | 2015 |    | North America | United States | Enteritidis             | Enteritidis | 1425  | 10709 |
| SAL_EA3550AA | CVM N51310  | SRR2567203 | 2013 |    | North America | United States | Enteritidis             | Enteritidis | 1425  | 10692 |
| SAL_EA3551AA | CVM N51309  | SRR2567202 | 2013 |    | North America | United States | Enteritidis             | Enteritidis | 1425  | 10691 |
| SAL_EA3623AA | CVM N50448  | SRR2567130 | 2013 |    | North America | United States | Enteritidis             | Enteritidis | 1425  | 10623 |
| SAL_EA3624AA | CVM N50447  | SRR2567129 | 2013 |    | North America | United States | Enteritidis             | Enteritidis | 1425  | 10622 |
| SAL_EA3640AA | CVM N50431  | SRR2567113 | 2013 |    | North America | United States | Enteritidis             | Enteritidis | 1425  | 10606 |
| SAL_EA3645AA | CVM N50426  | SRR2567108 | 2013 |    | North America | United States | Enteritidis             | Enteritidis | 1425  | 10601 |
| SAL_EA3647AA | CVM N50424  | SRR2567106 | 2013 |    | North America | United States | Enteritidis             | Enteritidis | 1425  | 10599 |
| SAL_EA3662AA | CVM N48702  | SRR2567091 | 2013 |    | North America | United States | Enteritidis             | Enteritidis | 1425  | 10584 |
| SAL_EA3683AA | CVM N48681  | SRR2567070 | 2013 |    | North America | United States | Enteritidis             | Enteritidis | 1425  | 10565 |
| SAL_EA3694AA | CVM N47727  | SRR2567059 | 2013 |    | North America | United States | Enteritidis             | Enteritidis | 1425  | 10554 |
| SAL_EA3733AA | CVM N46839  | SRR2567020 | 2013 |    | North America | United States | Enteritidis             | Enteritidis | 1425  | 10517 |
| SAL_EA3734AA | CVM N46838  | SRR2567019 | 2013 |    | North America | United States | Enteritidis             | Enteritidis | 1425  | 10516 |
| SAL_EA3750AA | CVM N46822  | SRR2567003 | 2013 |    | North America | United States | Enteritidis             | Enteritidis | 1425  | 10500 |
| SAL_EA3755AA | CVM N46817  | SRR2566998 | 2013 |    | North America | United States | Enteritidis             | Enteritidis | 1425  | 10495 |
| SAL_EA3797AA | CVM N45409  | SRR2566956 | 2013 |    | North America | United States | Enteritidis             | Enteritidis | 1425  | 10454 |
| SAL_EA3799AA | CVM N45407  | SRR2566954 | 2013 |    | North America | United States | Enteritidis             | Enteritidis | 1425  | 10452 |
| SAL_EA3832AA | CVM N44704  | SRR2566923 | 2013 |    | North America | United States | Enteritidis             | Enteritidis | 1425  | 10420 |
| SAL_EA3850AA | CVM N43833  | SRR2566907 | 2013 |    | North America | United States | Enteritidis             | Enteritidis | 1425  | 10403 |
| SAL_EA3870AA | CVM N43476  | SRR2566887 | 2013 |    | North America | United States | Enteritidis             | Enteritidis | 1425  | 10383 |
| SAL_EA3876AA | CVM N43470  | SRR2566881 | 2013 |    | North America | United States | Enteritidis             | Enteritidis | 1425  | 10378 |
| SAL_EA3878AA | CVM N43468  | SRR2566879 | 2013 |    | North America | United States | Enteritidis             | Enteritidis | 1425  | 10376 |
| SAL_EA3882AA | CVM N43464  | SRR2566875 | 2013 |    | North America | United States | Enteritidis             | Enteritidis | 1425  | 10372 |
| SAL_EA3888AA | CVM N43458  | SRR2566869 | 2013 |    | North America | United States | Enteritidis             | Enteritidis | 1425  | 10366 |
| SAL_EA3889AA | CVM N43457  | SRR2566868 | 2013 |    | North America | United States | Enteritidis             | Enteritidis | 1425  | 10365 |
| SAL_EA3895AA | CVM N43451  | SRR2566862 | 2013 |    | North America | United States | Enteritidis             | Enteritidis | 1425  | 10360 |
| SAL_EA3897AA | CVM N43449  | SRR2566860 | 2013 |    | North America | United States | Enteritidis             | Enteritidis | 1425  | 10358 |
| SAL_EA4010AA | NY59080747  | SRR2566761 | 2015 | 8  | North America | United States | Enteritidis             | Enteritidis | 1425  | 10276 |
| SAL_EA4011AA | NY59080698  | SRR2566760 | 2015 | 8  | North America | United States | Enteritidis             | Enteritidis | 1425  | 10274 |
| SAL_EA4012AA | NY58982376  | SRR2566758 | 2015 | 8  | North America | United States | Enteritidis             | Enteritidis | 1425  | 10275 |
| SAL_EA4013AA | NY58961956  | SRR2566757 | 2015 | 8  | North America | United States | Enteritidis             | Enteritidis | 1425  | 10273 |
| SAL_EA4014AA | NY58961905  | SRR2566756 | 2015 | 8  | North America | United States | Enteritidis             | Enteritidis | 1425  | 10272 |
| SAL_EA4015AA | NY59238186  | SRR2566753 | 2015 | 9  | North America | United States | Enteritidis             | Enteritidis | 1425  | 10271 |
| SAL_EA4016AA | NY59238138  | SRR2566751 | 2015 | 9  | North America | United States | Enteritidis             | Enteritidis | 26483 | 10270 |
| SAL_EA4017AA | NY59200108  | SRR2566750 | 2015 | 9  | North America | United States | Enteritidis             | Enteritidis | 1425  | 10269 |
| SAL_EA4018AA | NY59200087  | SRR2566749 | 2015 | 9  | North America | United States | Enteritidis             | Enteritidis | 1425  | 10268 |
| SAL_EA4019AA | NY59136601  | SRR2566747 | 2015 | 9  | North America | United States | Enteritidis             | Enteritidis | 1425  | 9138  |
| SAL_EA4020AA | NY59080685  | SRR2566734 | 2015 | 8  | North America | United States | Enteritidis             | Enteritidis | 1425  | 10267 |
| SAL_EA4021AA | NY59080632  | SRR2566733 | 2015 | 8  | North America | United States | Enteritidis             | Enteritidis | 1425  | 10266 |
| SAL_EA4022AA | NY58964103  | SRR2566731 | 2015 | 8  | North America | United States | Enteritidis             | Enteritidis | 1425  | 10265 |
| SAL_EA4023AA | NY59238226  | SRR2566730 | 2015 | 9  | North America | United States | Enteritidis             | Enteritidis | 1425  | 10264 |
| SAL_EA4024AA | NY58961892  | SRR2566728 | 2015 | 8  | North America | United States | Enteritidis             | Enteritidis | 1425  | 10263 |
| SAL_EA4025AA | NY58277913  | SRR2566727 | 2015 | 7  | North America | United States | Enteritidis             | Enteritidis | 1425  | 10156 |
| SAL_EA4042AA | E2015013832 | SRR2559367 | 2015 | 9  | North America | United States | Enteritidis             | Enteritidis | 1425  | 10247 |
| SAL_EA4043AA | E2015013909 | SRR2559366 | 2015 | 9  | North America | United States | Enteritidis             | Enteritidis | 1425  | 10246 |
| SAL_EA4044AA | E2015013787 | SRR2559365 | 2015 | 9  | North America | United States | Enteritidis             | Enteritidis | 1425  | 10245 |
| SAL_EA4045AA | E2015013546 | SRR2559364 | 2015 | 9  | North America | United States | Enteritidis             | Enteritidis | 1425  | 10244 |
| SAL_EA4046AA | NY58851607  | SRR2559321 |      |    |               |               | Enteritidis (Predicted) | Enteritidis | 1425  | 10243 |
| SAL_EA4047AA | NY58851516  | SRR2559320 |      |    |               |               | Enteritidis (Predicted) | Enteritidis | 1425  | 10242 |
| SAL_EA4048AA | NY58851438  | SRR2559319 |      |    |               |               | Enteritidis (Predicted) | Enteritidis | 1425  | 10241 |
| SAL_EA4049AA | NY58851695  | SRR2559318 |      |    |               |               | Enteritidis (Predicted) | Enteritidis | 1425  | 10240 |
| SAL_EA4092AA | NY58895207  | SRR2451965 | 2015 | 8  | North America | United States | Enteritidis             | Enteritidis | 1425  | 10211 |
| SAL_EA4093AA | NY58895186  | SRR2451964 | 2015 | 8  | North America | United States | Enteritidis             | Enteritidis | 1425  | 10210 |
| SAL_EA4094AA | NY58851851  | SRR2451963 | 2015 | 6  | North America | United States | Enteritidis             | Enteritidis | 1425  | 10209 |
| SAL_EA4095AA | NY58851760  | SRR2422839 | 2015 | 8  | North America | United States | Enteritidis             | Enteritidis | 1425  | 10208 |
| SAL_EA4096AA | NY58851593  | SRR2422799 | 2015 | 8  | North America | United States | Enteritidis             | Enteritidis | 1425  | 10207 |
| SAL_EA4097AA | NY58800391  | SRR2422756 | 2015 | 8  | North America | United States | Enteritidis             | Enteritidis | 1425  | 8389  |

|              |                |            |      |   |               |               |             |             |       |       |
|--------------|----------------|------------|------|---|---------------|---------------|-------------|-------------|-------|-------|
| SAL_EA4099AA | 0000-0053-5947 | SRR2341508 | 2015 |   | North America | United States | Enteritidis | Enteritidis | 1425  | 10205 |
| SAL_EA4103AA | 0000-0051-8442 | SRR2341408 | 2015 |   | North America | United States | Enteritidis | Enteritidis | 1425  | 10201 |
| SAL_EA4104AA | NY58703876     | SRR2318712 | 2015 | 8 | North America | United States | Enteritidis | Enteritidis | 1425  | 10200 |
| SAL_EA4105AA | NY58703799     | SRR2318711 | 2015 | 8 | North America | United States | Enteritidis | Enteritidis | 1425  | 10199 |
| SAL_EA4106AA | NY58703781     | SRR2318710 | 2015 | 8 | North America | United States | Enteritidis | Enteritidis | 1425  | 10198 |
| SAL_EA4107AA | NY58703765     | SRR2318709 | 2015 | 8 | North America | United States | Enteritidis | Enteritidis | 27779 | 10197 |
| SAL_EA4108AA | NY58642507     | SRR2318708 | 2015 | 8 | North America | United States | Enteritidis | Enteritidis | 1425  | 10196 |
| SAL_EA4109AA | NY58592785     | SRR2318707 | 2015 | 8 | North America | United States | Enteritidis | Enteritidis | 1425  | 10195 |
| SAL_EA4110AA | NY58592614     | SRR2318705 | 2015 | 8 | North America | United States | Enteritidis | Enteritidis | 1425  | 10194 |
| SAL_EA4111AA | NY58364782     | SRR2296852 | 2015 | 7 | North America | United States | Enteritidis | Enteritidis | 1425  | 10193 |
| SAL_EA4112AA | NY58364767     | SRR2296851 | 2015 | 8 | North America | United States | Enteritidis | Enteritidis | 1425  | 10192 |
| SAL_EA4113AA | NY58364714     | SRR2296850 | 2015 | 8 | North America | United States | Enteritidis | Enteritidis | 1425  | 10191 |
| SAL_EA4114AA | NY58364624     | SRR2296849 | 2015 | 7 | North America | United States | Enteritidis | Enteritidis | 1425  | 10190 |
| SAL_EA4115AA | NY58364429     | SRR2296848 | 2015 | 8 | North America | United States | Enteritidis | Enteritidis | 1425  | 10189 |
| SAL_EA4116AA | NY58277261     | SRR2296847 | 2015 | 7 | North America | United States | Enteritidis | Enteritidis | 1425  | 10188 |
| SAL_EA4117AA | NY58277242     | SRR2296846 | 2015 | 7 | North America | United States | Enteritidis | Enteritidis | 1425  | 10187 |
| SAL_EA4118AA | NY58277201     | SRR2296845 | 2015 | 7 | North America | United States | Enteritidis | Enteritidis | 1425  | 10186 |
| SAL_EA4119AA | NY58474216     | SRR2296843 | 2015 | 8 | North America | United States | Enteritidis | Enteritidis | 1425  | 10185 |
| SAL_EA4120AA | NY58474062     | SRR2296842 | 2015 | 8 | North America | United States | Enteritidis | Enteritidis | 1425  | 10184 |
| SAL_EA4121AA | NY58473931     | SRR2296841 | 2015 | 7 | North America | United States | Enteritidis | Enteritidis | 1425  | 10183 |
| SAL_EA4122AA | NY58473252     | SRR2296840 | 2015 | 8 | North America | United States | Enteritidis | Enteritidis | 1425  | 10182 |
| SAL_EA4123AA | NY58276992     | SRR2296839 | 2015 | 8 | North America | United States | Enteritidis | Enteritidis | 1425  | 10181 |
| SAL_EA4124AA | NY58276931     | SRR2296838 | 2015 | 8 | North America | United States | Enteritidis | Enteritidis | 1425  | 10180 |
| SAL_EA4127AA | FSI51501043    | SRR2239957 | 2015 |   | North America | United States | Enteritidis | Enteritidis | 1425  | 10177 |
| SAL_EA4152AA | NY58277053     | SRR2218462 | 2015 | 8 | North America | United States | Enteritidis | Enteritidis | 1425  | 10159 |
| SAL_EA4153AA | NY58276911     | SRR2218461 | 2015 | 7 | North America | United States | Enteritidis | Enteritidis | 1425  | 10158 |
| SAL_EA4154AA | NY58212073     | SRR2187695 | 2015 | 7 | North America | United States | Enteritidis | Enteritidis | 1425  | 10157 |
| SAL_EA4155AA | NY58211943     | SRR2187694 | 2015 | 7 | North America | United States | Enteritidis | Enteritidis | 1425  | 10156 |
| SAL_EA4156AA | NY58048947     | SRR2187693 | 2015 | 7 | North America | United States | Enteritidis | Enteritidis | 1425  | 10155 |
| SAL_EA4157AA | NY58048932     | SRR2187692 | 2015 | 7 | North America | United States | Enteritidis | Enteritidis | 1425  | 10154 |
| SAL_EA4158AA | NY58048917     | SRR2187691 | 2015 | 7 | North America | United States | Enteritidis | Enteritidis | 1425  | 10153 |
| SAL_EA4159AA | NY58046494     | SRR2187690 | 2015 | 7 | North America | United States | Enteritidis | Enteritidis | 1425  | 10152 |
| SAL_EA4160AA | NY58046468     | SRR2187689 | 2015 | 7 | North America | United States | Enteritidis | Enteritidis | 1425  | 10152 |
| SAL_EA4161AA | NY58046405     | SRR2187688 | 2015 | 7 | North America | United States | Enteritidis | Enteritidis | 1425  | 10151 |
| SAL_EA4162AA | NY58227041     | SRR2187687 | 2015 | 7 | North America | United States | Enteritidis | Enteritidis | 1425  | 10150 |
| SAL_EA4163AA | NY58223648     | SRR2187686 | 2015 | 7 | North America | United States | Enteritidis | Enteritidis | 1425  | 10149 |
| SAL_EA4164AA | NY58223281     | SRR2187685 | 2015 | 7 | North America | United States | Enteritidis | Enteritidis | 1425  | 10148 |
| SAL_EA4165AA | NY58221007     | SRR2187684 | 2015 | 7 | North America | United States | Enteritidis | Enteritidis | 1425  | 10147 |
| SAL_EA4166AA | NY57819061     | SRR2187683 | 2015 | 7 | North America | United States | Enteritidis | Enteritidis | 1425  | 10146 |
| SAL_EA4167AA | NY57819050     | SRR2187682 | 2015 | 7 | North America | United States | Enteritidis | Enteritidis | 1425  | 10145 |
| SAL_EA4185AA | CFSAN024735    | SRR2176225 | 2012 |   | South America | Chile         | Enteritidis | Enteritidis | 1425  | 10128 |
| SAL_EA4186AA | CFSAN024734    | SRR2176224 | 2012 |   | South America | Chile         | Enteritidis | Enteritidis | 1425  | 10120 |
| SAL_EA4187AA | CFSAN024733    | SRR2176223 | 2012 |   | South America | Chile         | Enteritidis | Enteritidis | 1425  | 10127 |
| SAL_EA4188AA | CFSAN024732    | SRR2176222 | 2012 |   | South America | Chile         | Enteritidis | Enteritidis | 27775 | 10126 |
| SAL_EA4189AA | CFSAN024731    | SRR2176221 | 2011 |   | South America | Chile         | Enteritidis | Enteritidis | 1425  | 10125 |
| SAL_EA4191AA | CFSAN024729    | SRR2176219 | 2010 |   | South America | Chile         | Enteritidis | Enteritidis | 1425  | 10123 |
| SAL_EA4192AA | CFSAN024755    | SRR2176218 | 2012 |   | South America | Chile         | Enteritidis | Enteritidis | 1425  | 10120 |
| SAL_EA4193AA | CFSAN024754    | SRR2176217 | 2012 |   | South America | Chile         | Enteritidis | Enteritidis | 1425  | 10120 |
| SAL_EA4194AA | CFSAN024753    | SRR2176216 | 2012 |   | South America | Chile         | Enteritidis | Enteritidis | 1425  | 10122 |
| SAL_EA4195AA | CFSAN024752    | SRR2176215 | 2012 |   | South America | Chile         | Enteritidis | Enteritidis | 1425  | 10121 |
| SAL_EA4196AA | CFSAN024751    | SRR2176214 | 2012 |   | South America | Chile         | Enteritidis | Enteritidis | 1425  | 10120 |
| SAL_EA4197AA | CFSAN024750    | SRR2176213 | 2012 |   | South America | Chile         | Enteritidis | Enteritidis | 1425  | 10120 |
| SAL_EA4198AA | CFSAN024749    | SRR2176211 | 2012 |   | South America | Chile         | Enteritidis | Enteritidis | 1425  | 10120 |
| SAL_EA4200AA | CFSAN024747    | SRR2176209 | 2012 |   | South America | Chile         | Enteritidis | Enteritidis | 1425  | 10118 |
| SAL_EA4201AA | CFSAN024746    | SRR2176208 | 2011 |   | South America | Chile         | Enteritidis | Enteritidis | 1425  | 10117 |
| SAL_EA4203AA | CFSAN024745    | SRR2176204 | 2012 |   | South America | Chile         | Enteritidis | Enteritidis | 1425  | 10116 |
| SAL_EA4204AA | CFSAN024744    | SRR2176203 | 2012 |   | South America | Chile         | Enteritidis | Enteritidis | 1425  | 10115 |
| SAL_EA4205AA | CFSAN024743    | SRR2176202 | 2012 |   | South America | Chile         | Enteritidis | Enteritidis | 1425  | 10115 |
| SAL_EA4206AA | CFSAN024742    | SRR2176201 | 2012 |   | South America | Chile         | Enteritidis | Enteritidis | 27775 | 10114 |

|              |                   |            |      |    |               |               |                         |             |       |       |
|--------------|-------------------|------------|------|----|---------------|---------------|-------------------------|-------------|-------|-------|
| SAL_EA4207AA | CFSAN024741       | SRR2176200 | 2012 |    | South America | Chile         | Enteritidis             | Enteritidis | 1425  | 10113 |
| SAL_EA4208AA | CFSAN024740       | SRR2176199 | 2012 |    | South America | Chile         | Enteritidis             | Enteritidis | 1425  | 10112 |
| SAL_EA4209AA | CFSAN024739       | SRR2176198 | 2012 |    | South America | Chile         | Enteritidis             | Enteritidis | 1425  | 10111 |
| SAL_EA4210AA | CFSAN024738       | SRR2176197 | 2012 |    | South America | Chile         | Enteritidis             | Enteritidis | 1425  | 10110 |
| SAL_EA4211AA | CFSAN024737       | SRR2176196 | 2012 |    | South America | Chile         | Enteritidis             | Enteritidis | 1425  | 10109 |
| SAL_EA4212AA | CFSAN024736       | SRR2176195 | 2012 |    | South America | Chile         | Enteritidis             | Enteritidis | 1425  | 10108 |
| SAL_EA4213AA | CFSAN024727       | SRR2176194 | 2009 |    | South America | Chile         | Enteritidis             | Enteritidis | 1425  | 1035  |
| SAL_EA4214AA | CFSAN024726       | SRR2176193 | 2009 |    | South America | Chile         | Enteritidis             | Enteritidis | 1425  | 10107 |
| SAL_EA4261AA | E2015015187       | SRR2831448 | 2015 | 10 | North America | United States | Enteritidis             | Enteritidis | 26775 | 10068 |
| SAL_EA4262AA | E2015014948       | SRR2831447 | 2015 | 10 | North America | United States | Enteritidis             | Enteritidis | 27901 | 10067 |
| SAL_EA4263AA | E2015014944       | SRR2831445 | 2015 | 10 | North America | United States | Enteritidis             | Enteritidis | 1425  | 10066 |
| SAL_EA4264AA | E2015014909       | SRR2831444 | 2015 | 10 | North America | United States | Enteritidis             | Enteritidis | 1425  | 10065 |
| SAL_EA4265AA | E2015014906       | SRR2831443 | 2015 | 10 | North America | United States | Enteritidis             | Enteritidis | 27885 | 10064 |
| SAL_EA4266AA | E2015014863       | SRR2831442 | 2015 | 10 | North America | United States | Enteritidis             | Enteritidis | 1425  | 10063 |
| SAL_EA4267AA | E2015014853       | SRR2831441 | 2015 | 10 | North America | United States | Enteritidis             | Enteritidis | 1425  | 10062 |
| SAL_EA4786AA | E2015015239       | SRR2906170 | 2015 | 10 | North America | United States | Enteritidis             | Enteritidis | 1425  | 3333  |
| SAL_EA4790AA | E2015015342       | SRR2906166 | 2015 | 10 | North America | United States | Enteritidis             | Enteritidis | 1425  | 9593  |
| SAL_EA4791AA | E2015015299       | SRR2906165 | 2015 | 10 | North America | United States | Enteritidis             | Enteritidis | 1425  | 9592  |
| SAL_EA4792AA | E2015015259       | SRR2906164 | 2015 | 10 | North America | United States | Enteritidis             | Enteritidis | 1425  | 9591  |
| SAL_EA4793AA | E2015015240       | SRR2906163 | 2015 | 10 | North America | United States | Enteritidis             | Enteritidis | 1425  | 9590  |
| SAL_EA4825AA | FDA00009622       | SRR2911026 | 2015 | 10 | North America | United States | Enteritidis (Predicted) | Enteritidis | 1425  | 9575  |
| SAL_EA4829AA | FDA00001997       | SRR2911006 | 2004 | 1  | North America | United States | Enteritidis             | Enteritidis | 1425  | 9571  |
| SAL_EA4830AA | FDA00001996       | SRR2911005 | 2004 | 1  | North America | United States | Enteritidis             | Enteritidis | 1425  | 9570  |
| SAL_EA4832AA | FDA00001994       | SRR2911003 | 2004 | 1  | North America | United States | Enteritidis             | Enteritidis | 1425  | 9568  |
| SAL_EA4868AA | CFSAN034774       | SRR2910631 | 2014 | 12 | North America | United States | Enteritidis (Predicted) | Enteritidis | 27472 | 9532  |
| SAL_EA4869AA | CFSAN034773       | SRR2910630 | 2014 | 12 | North America | United States | Enteritidis (Predicted) | Enteritidis | 1425  | 9531  |
| SAL_EA4870AA | CFSAN034772       | SRR2910629 | 2014 | 12 | North America | United States | Enteritidis (Predicted) | Enteritidis | 1425  | 9530  |
| SAL_EA4871AA | IEH-NGS-SAL-03233 | SRR2910628 | 2014 | 12 | North America | United States | Enteritidis (Predicted) | Enteritidis | 1425  | 9529  |
| SAL_EA4872AA | IEH-NGS-SAL-03232 | SRR2910627 | 2014 | 12 | North America | United States | Enteritidis (Predicted) | Enteritidis | 1425  | 9528  |
| SAL_EA4873AA | CFSAN034769       | SRR2910626 | 2014 | 12 | North America | United States | Enteritidis (Predicted) | Enteritidis | 1425  | 9527  |
| SAL_EA4874AA | CFSAN034768       | SRR2910625 | 2014 | 12 | North America | United States | Enteritidis (Predicted) | Enteritidis | 1425  | 9526  |
| SAL_EA4875AA | CFSAN034767       | SRR2910624 | 2014 | 12 | North America | United States | Enteritidis (Predicted) | Enteritidis | 1425  | 9525  |
| SAL_EA4876AA | CFSAN034766       | SRR2910623 | 2014 | 12 | North America | United States | Enteritidis (Predicted) | Enteritidis | 1425  | 9524  |
| SAL_EA4877AA | CFSAN034765       | SRR2910622 | 2014 | 12 | North America | United States | Enteritidis (Predicted) | Enteritidis | 1425  | 9523  |
| SAL_EA4910AA | WAPHL_SAL-A00935  | SRR2906736 | 2015 | 8  | North America | United States | Enteritidis             | Enteritidis | 1425  | 9491  |
| SAL_EA4911AA | WAPHL_SAL-A00934  | SRR2906735 | 2015 | 7  | North America | United States | Enteritidis             | Enteritidis | 1425  | 9490  |
| SAL_EA4912AA | WAPHL_SAL-A00931  | SRR2906734 | 2015 | 6  | North America | United States | Enteritidis             | Enteritidis | 1425  | 6712  |
| SAL_EA4913AA | WAPHL_SAL-A00932  | SRR2906733 | 2015 | 7  | North America | United States | Enteritidis             | Enteritidis | 1425  | 6712  |
| SAL_EA4920AA | VA-WGS-00532      | SRR2912653 | 2008 |    | North America | United States | Enteritidis             | Enteritidis | 1425  | 9483  |
| SAL_EA4925AA | VA-WGS-00527      | SRR2912645 | 2008 |    | North America | United States | Enteritidis             | Enteritidis | 1425  | 9479  |
| SAL_EA4956AA | VA-WGS-00516      | SRR2911786 | 2008 |    | North America | United States | Enteritidis             | Enteritidis | 1425  | 9454  |
| SAL_EA4958AA | VA-WGS-00514      | SRR2911784 | 2008 |    | North America | United States | Enteritidis             | Enteritidis | 1425  | 9452  |
| SAL_EA5013AA | E2015015718       | SRR2914510 | 2015 | 10 | North America | United States | Enteritidis             | Enteritidis | 1425  | 9400  |
| SAL_EA5014AA | E2015015776       | SRR2914508 | 2015 | 10 | North America | United States | Enteritidis             | Enteritidis | 1425  | 9399  |
| SAL_EA5015AA | E2015015391       | SRR2914507 | 2015 | 10 | North America | United States | Enteritidis             | Enteritidis | 1425  | 9398  |
| SAL_EA5022AA | PNUSAS001070      | SRR2914287 | 2015 | 8  | North America | United States | Enteritidis             | Enteritidis | 1425  | 9391  |
| SAL_EA5084AA | 2015K-1106        | SRR2913540 |      |    | North America | United States | Enteritidis (Predicted) | Enteritidis | 1425  | 3333  |
| SAL_EA5085AA | 2015K-1105        | SRR2913539 |      |    | North America | United States | Enteritidis (Predicted) | Enteritidis | 1425  | 3333  |
| SAL_EA5098AA | 2015K-1108        | SRR2913362 |      |    | North America | United States | Enteritidis (Predicted) | Enteritidis | 1425  | 9332  |
| SAL_EA5099AA | 2015K-1107        | SRR2913361 |      |    | North America | United States | Enteritidis (Predicted) | Enteritidis | 1425  | 9331  |
| SAL_EA5100AA | 2015K-1104        | SRR2913360 |      |    | North America | United States | Enteritidis (Predicted) | Enteritidis | 1425  | 9330  |
| SAL_EA5105AA | PNUSAS001154      | SRR2913304 |      |    | North America | United States | Enteritidis (Predicted) | Enteritidis | 1425  | 9326  |
| SAL_EA5106AA | PNUSAS001153      | SRR2913303 |      |    | North America | United States | Enteritidis (Predicted) | Enteritidis | 1425  | 9325  |
| SAL_EA5107AA | PNUSAS001152      | SRR2913302 |      |    | North America | United States | Enteritidis (Predicted) | Enteritidis | 1425  | 9324  |
| SAL_EA5128AA | PNUSAS001156      | SRR2917148 |      |    | North America | United States | Enteritidis (Predicted) | Enteritidis | 1425  | 9304  |
| SAL_EA5129AA | PNUSAS001155      | SRR2917141 |      |    | North America | United States | Enteritidis (Predicted) | Enteritidis | 1425  | 9303  |
| SAL_EA5135AA | PNUSAS000965      | SRR2917135 |      |    | North America | United States | Enteritidis (Predicted) | Enteritidis | 1425  | 5380  |
| SAL_EA5136AA | PNUSAS000963      | SRR2917134 |      |    | North America | United States | Enteritidis (Predicted) | Enteritidis | 1425  | 5380  |
| SAL_EA5137AA | PNUSAS000964      | SRR2917133 |      |    | North America | United States | Enteritidis             | Enteritidis | 1425  | 5380  |



|              |               |            |      |    |               |               |                         |             |       |      |
|--------------|---------------|------------|------|----|---------------|---------------|-------------------------|-------------|-------|------|
| SAL_EA5158AA | FDA00009434   | SRR2906730 | 2015 | 9  |               |               | Enteritidis (Predicted) | Enteritidis | 1425  | 9279 |
| SAL_EA5165AA | VA-WGS-00509  | SRR2918190 | 2008 |    | North America | United States | Enteritidis             | Enteritidis | 1425  | 9274 |
| SAL_EA5231AA | FSIS1502817   | SRR2925647 | 2015 |    | North America | United States | Enteritidis             | Enteritidis | 27901 | 9217 |
| SAL_EA5237AA | FSIS1502815   | SRR2925640 | 2015 |    | North America | United States | Enteritidis             | Enteritidis | 1425  | 9213 |
| SAL_EA5249AA | FSIS1503362   | SRR2925323 | 2015 |    | North America | United States | Enteritidis             | Enteritidis | 1425  | 9202 |
| SAL_EA5310AA | PNUSA5001218  | SRR2939521 | 2015 | 9  | North America | United States | Enteritidis             | Enteritidis | 1425  | 5380 |
| SAL_EA5323AA | E2015016458   | SRR2954254 | 2015 | 11 | North America | United States | Enteritidis             | Enteritidis | 1425  | 9138 |
| SAL_EA5324AA | E2015016457   | SRR2954253 | 2015 | 11 | North America | United States | Enteritidis             | Enteritidis | 1425  | 9138 |
| SAL_EA5337AA | FSIS1503461   | SRR2954358 | 2015 |    | North America | United States | Enteritidis             | Enteritidis | 1425  | 9127 |
| SAL_EA5553AA | MOD1-Lipp-402 | SRR2966834 | 2006 | 8  | North America | United States | Enteritidis             | Enteritidis | 28719 | 8987 |
| SAL_EA5620AA | 2015K-0769    | SRR2969503 | 2015 | 6  | North America | United States | Enteritidis             | Enteritidis | 1425  | 8925 |
| SAL_EA5690AA | E2015012194   | SRR2968600 | 2015 | 8  | North America | United States | Enteritidis             | Enteritidis | 1425  | 8869 |
| SAL_EA5810AA | VA-WGS-00491  | SRR2982343 | 2008 |    | North America | United States | Enteritidis             | Enteritidis | 1425  | 8780 |
| SAL_EA5971AA | E2015017264   | SRR2976759 | 2015 | 11 | North America | United States | Enteritidis             | Enteritidis | 1425  | 8634 |
| SAL_EA5972AA | E2015017252   | SRR2976758 | 2015 | 11 | North America | United States | Enteritidis             | Enteritidis | 1425  | 8633 |
| SAL_EA5989AA | PNUSA5000977  | SRR2976019 | 2015 | 8  | North America | United States | Enteritidis             | Enteritidis | 1425  | 8621 |
| SAL_EA5990AA | PNUSA5000910  | SRR2976018 | 2015 | 8  | North America | United States | Enteritidis             | Enteritidis | 1425  | 8620 |
| SAL_EA5991AA | PNUSA5000909  | SRR2976017 | 2015 | 8  | North America | United States | Enteritidis             | Enteritidis | 1425  | 8619 |
| SAL_EA6012AA | PNUSA5001029  | SRR2975977 |      |    | North America | United States | Enteritidis (Predicted) | Enteritidis | 1425  | 8600 |
| SAL_EA6124AA | 2015K-1103    | SRR2973812 |      |    | North America | United States | Enteritidis (Predicted) | Enteritidis | 1425  | 3333 |
| SAL_EA6161AA | 2015K-0730    | SRR2972338 | 2015 | 6  | North America | United States | Enteritidis             | Enteritidis | 1425  | 8477 |
| SAL_EA6178AA | ADRD-15-6315  | SRR2971407 | 2015 |    | North America | United States | Enteritidis             | Enteritidis | 7801  | 8462 |
| SAL_EA6196AA | FSIS1505003   | SRR2970940 | 2015 |    | North America | United States | Enteritidis             | Enteritidis | 1425  | 8447 |
| SAL_EA6199AA | FSIS1505002   | SRR2970917 | 2015 |    | North America | United States | Enteritidis             | Enteritidis | 1425  | 8444 |
| SAL_EA6200AA | FSIS1505001   | SRR2970898 | 2015 |    | North America | United States | Enteritidis             | Enteritidis | 1425  | 8444 |
| SAL_EA6201AA | E2015016768   | SRR2968059 | 2015 | 11 | North America | United States | Enteritidis             | Enteritidis | 1425  | 8443 |
| SAL_EA6202AA | NY59977125    | SRR2937465 | 2015 | 9  | North America | United States | Enteritidis             | Enteritidis | 1425  | 8442 |
| SAL_EA6203AA | NY59371642    | SRR2937464 | 2015 | 9  | North America | United States | Enteritidis             | Enteritidis | 1425  | 8441 |
| SAL_EA6204AA | NY59918542    | SRR2913283 | 2015 | 10 | North America | United States | Enteritidis             | Enteritidis | 1425  | 8440 |
| SAL_EA6205AA | NY59876803    | SRR2913281 | 2015 | 9  | North America | United States | Enteritidis             | Enteritidis | 1425  | 8439 |
| SAL_EA6206AA | NY59550191    | SRR2913280 | 2015 | 9  | North America | United States | Enteritidis             | Enteritidis | 1425  | 8438 |
| SAL_EA6208AA | NY59478967    | SRR2913277 | 2015 | 9  | North America | United States | Enteritidis             | Enteritidis | 7811  | 8436 |
| SAL_EA6209AA | NY59371436    | SRR2913276 | 2015 | 9  | North America | United States | Enteritidis             | Enteritidis | 1425  | 8435 |
| SAL_EA6210AA | NY59297775    | SRR2913274 | 2015 | 9  | North America | United States | Enteritidis             | Enteritidis | 1425  | 8434 |
| SAL_EA6216AA | FSIS1504878   | SRR2920065 | 2015 |    | North America | United States | Enteritidis             | Enteritidis | 1425  | 8428 |
| SAL_EA6235AA | NY59977200    | SRR2891612 | 2015 | 9  | North America | United States | Enteritidis             | Enteritidis | 3888  | 8412 |
| SAL_EA6236AA | NY59977027    | SRR2891611 | 2015 | 10 | North America | United States | Enteritidis             | Enteritidis | 1425  | 8411 |
| SAL_EA6237AA | NY59926854    | SRR2891610 | 2015 | 10 | North America | United States | Enteritidis             | Enteritidis | 1425  | 8410 |
| SAL_EA6238AA | NY59926810    | SRR2891609 | 2015 | 10 | North America | United States | Enteritidis             | Enteritidis | 1425  | 8409 |
| SAL_EA6239AA | NY59926192    | SRR2891608 | 2015 | 10 | North America | United States | Enteritidis             | Enteritidis | 1425  | 8408 |
| SAL_EA6240AA | NY59918937    | SRR2891607 | 2015 | 10 | North America | United States | Enteritidis             | Enteritidis | 1425  | 8391 |
| SAL_EA6241AA | NY59918888    | SRR2891606 | 2015 | 9  | North America | United States | Enteritidis             | Enteritidis | 1425  | 8407 |
| SAL_EA6242AA | NY59918848    | SRR2891605 | 2015 | 10 | North America | United States | Enteritidis             | Enteritidis | 1425  | 8406 |
| SAL_EA6243AA | NY59918471    | SRR2891604 | 2015 | 10 | North America | United States | Enteritidis             | Enteritidis | 1425  | 8405 |
| SAL_EA6244AA | NY59876834    | SRR2891006 | 2015 | 9  | North America | United States | Enteritidis             | Enteritidis | 1425  | 8404 |
| SAL_EA6245AA | NY59876758    | SRR2891005 | 2015 | 9  | North America | United States | Enteritidis             | Enteritidis | 1425  | 8403 |
| SAL_EA6246AA | NY59876559    | SRR2891004 | 2015 | 9  | North America | United States | Enteritidis             | Enteritidis | 1425  | 8402 |
| SAL_EA6247AA | NY59371629    | SRR2891003 | 2015 | 9  | North America | United States | Enteritidis             | Enteritidis | 1425  | 8401 |
| SAL_EA6248AA | NY59371508    | SRR2891002 | 2015 | 9  | North America | United States | Enteritidis             | Enteritidis | 1425  | 8400 |
| SAL_EA6249AA | NY59297740    | SRR2891001 | 2015 | 9  | North America | United States | Enteritidis             | Enteritidis | 1425  | 8399 |
| SAL_EA6250AA | NY59297727    | SRR2891000 | 2015 | 9  | North America | United States | Enteritidis             | Enteritidis | 1425  | 8398 |
| SAL_EA6251AA | NY59297711    | SRR2890999 | 2015 | 9  | North America | United States | Enteritidis             | Enteritidis | 1425  | 8397 |
| SAL_EA6252AA | NY59297691    | SRR2890998 | 2015 | 9  | North America | United States | Enteritidis             | Enteritidis | 1425  | 8396 |
| SAL_EA6253AA | E2015012669   | SRR2585379 | 2015 | 9  | North America | United States | Enteritidis             | Enteritidis | 1425  | 8395 |
| SAL_EA6254AA | NY59371706    | SRR2847924 | 2015 | 9  | North America | United States | Enteritidis             | Enteritidis | 1425  | 2054 |
| SAL_EA6255AA | NY59297540    | SRR2847923 | 2015 | 9  | North America | United States | Enteritidis             | Enteritidis | 1425  | 8394 |
| SAL_EA6256AA | NY59136577    | SRR2847922 | 2015 | 8  | North America | United States | Enteritidis             | Enteritidis | 1425  | 8393 |
| SAL_EA6257AA | NY59136564    | SRR2847921 | 2015 | 8  | North America | United States | Enteritidis             | Enteritidis | 1425  | 2054 |
| SAL_EA6258AA | NY59080619    | SRR2847920 | 2015 | 8  | North America | United States | Enteritidis             | Enteritidis | 1425  | 8392 |

|              |                    |            |      |    |               |                |                         |             |       |      |
|--------------|--------------------|------------|------|----|---------------|----------------|-------------------------|-------------|-------|------|
| SAL_EA6259AA | NY59680303         | SRR2843234 | 2015 | 9  | North America | United States  | Enteritidis             | Enteritidis | 1425  | 8391 |
| SAL_EA6260AA | NY59679385         | SRR2843233 | 2015 | 9  | North America | United States  | Enteritidis             | Enteritidis | 1425  | 8390 |
| SAL_EA6261AA | NY59675661         | SRR2843232 | 2015 | 9  | North America | United States  | Enteritidis             | Enteritidis | 1425  | 5380 |
| SAL_EA6262AA | NY59601741         | SRR2843231 |      |    | North America | United States  | Enteritidis             | Enteritidis | 1425  | 8389 |
| SAL_EA6263AA | NY59601725         | SRR2843230 | 2015 | 8  | North America | United States  | Enteritidis             | Enteritidis | 1425  | 8388 |
| SAL_EA6324AA | 2015K-1359         | SRR3001542 |      |    | North America | United States  | Enteritidis (Predicted) | Enteritidis | 1425  | 8331 |
| SAL_EA6325AA | 2015K-1360         | SRR3001541 |      |    | North America | United States  | Enteritidis (Predicted) | Enteritidis | 1425  | 5380 |
| SAL_EA6326AA | 2015K-1358         | SRR3001540 |      |    | North America | United States  | Enteritidis (Predicted) | Enteritidis | 1425  | 5380 |
| SAL_EA6457AA | FDA00000821        | SRR3027080 | 2005 | 5  | Asia          | China          | Enteritidis             | Enteritidis | 1425  | 8257 |
| SAL_EA6550AA | E2015017909        | SRR3037416 | 2015 | 12 | North America | United States  | Enteritidis             | Enteritidis | 1425  | 1018 |
| SAL_EA6551AA | E2015017609        | SRR3037415 | 2015 | 12 | North America | United States  | Enteritidis             | Enteritidis | 1425  | 8176 |
| SAL_EA6552AA | AZ-TG79608         | SRR3037414 | 2015 |    | North America | United States  | Enteritidis (Predicted) | Enteritidis | 1425  | 4174 |
| SAL_EA6553AA | AZ-TG79604         | SRR3037413 | 2015 |    | North America | United States  | Enteritidis (Predicted) | Enteritidis | 1425  | 4174 |
| SAL_EA6554AA | AZ-TG79600         | SRR3037412 | 2015 |    | North America | United States  | Enteritidis (Predicted) | Enteritidis | 1425  | 8175 |
| SAL_EA6564AA | ADRD-126604-11-1-4 | SRR3037402 | 2011 | 11 | North America | United States  | Dublin                  | Enteritidis | 1425  | 8172 |
| SAL_EA6619AA | 2015K-1409         | SRR3030381 |      |    | North America | United States  | Enteritidis (Predicted) | Enteritidis | 1425  | 8127 |
| SAL_EA6733AA | FSIS1505177        | SRR3016236 | 2015 |    | North America | United States  | Enteritidis             | Enteritidis | 1425  | 8046 |
| SAL_EA6734AA | FSIS1505176        | SRR3016232 | 2015 |    | North America | United States  | Enteritidis             | Enteritidis | 1425  | 8045 |
| SAL_EA6735AA | FSIS1505179        | SRR3016114 | 2015 |    | North America | United States  | Enteritidis             | Enteritidis | 1425  | 8044 |
| SAL_EA6736AA | FSIS1505178        | SRR3016113 | 2015 |    | North America | United States  | Enteritidis             | Enteritidis | 1425  | 8044 |
| SAL_EA6760AA | E2015017577        | SRR2993269 | 2015 | 12 | North America | United States  | Enteritidis             | Enteritidis | 1425  | 8023 |
| SAL_EA6761AA | E2015017571        | SRR2993268 | 2015 | 11 | North America | United States  | Enteritidis             | Enteritidis | 1425  | 8022 |
| SAL_EA6762AA | E2015017439        | SRR2993267 | 2015 | 11 | North America | United States  | Enteritidis             | Enteritidis | 1425  | 8021 |
| SAL_EA6839AA | PNUSAS001336       | SRR3048029 | 2015 | 11 | North America | United States  | Enteritidis             | Enteritidis | 1425  | 3680 |
| SAL_EA6853AA | FDA00004115        | SRR3046418 | 2012 | 12 | North America | Mexico         | Rubislaw                | Enteritidis | 28412 | 7952 |
| SAL_EA6873AA | CVM-N23800         | SRR3045972 | 2010 |    | North America | United States  | Enteritidis             | Enteritidis | 33238 | 7933 |
| SAL_EA6881AA | 53057              | SRR3049970 |      |    | Europe        | United Kingdom | Enteritidis             | Enteritidis | 1425  | 7927 |
| SAL_EA6884AA | 82518              | SRR3049967 |      |    | Europe        | United Kingdom | Enteritidis             | Enteritidis | 3888  | 7925 |
| SAL_EA6888AA | 95248              | SRR3049963 |      |    | Europe        | United Kingdom | Enteritidis             | Enteritidis | 1425  | 7921 |
| SAL_EA6890AA | 53056              | SRR3049960 |      |    | Europe        | United Kingdom | Enteritidis             | Enteritidis | 3888  | 7919 |
| SAL_EA6901AA | 97252              | SRR3049948 |      |    | Europe        | United Kingdom | Enteritidis             | Enteritidis | 1425  | 7575 |
| SAL_EA6909AA | 1862               | SRR3049940 |      |    | Europe        | United Kingdom | Enteritidis             | Enteritidis | 1425  | 7903 |
| SAL_EA6910AA | 21115              | SRR3049939 | 2014 | 6  | 4 Europe      | United Kingdom | Enteritidis             | Enteritidis | 3888  | 7902 |
| SAL_EA6911AA | 21815              | SRR3049937 | 2014 | 6  | 9 Europe      | United Kingdom | Enteritidis             | Enteritidis | 3888  | 7901 |
| SAL_EA6916AA | 18553              | SRR3049932 |      |    | Europe        | United Kingdom | Enteritidis             | Enteritidis | 1425  | 7896 |
| SAL_EA6917AA | 15240              | SRR3049931 |      |    | Europe        | United Kingdom | Enteritidis             | Enteritidis | 1425  | 7895 |
| SAL_EA6922AA | 43965              | SRR3049925 |      |    | Europe        | United Kingdom | Enteritidis             | Enteritidis | 1425  | 7890 |
| SAL_EA6927AA | 29965              | SRR3049920 |      |    | Europe        | United Kingdom | Enteritidis             | Enteritidis | 1425  | 7885 |
| SAL_EA6931AA | 53020              | SRR3049915 |      |    | Europe        | United Kingdom | Enteritidis             | Enteritidis | 3906  | 7881 |
| SAL_EA6933AA | 21869              | SRR3049911 |      |    | Europe        | United Kingdom | Enteritidis             | Enteritidis | 1425  | 7879 |
| SAL_EA6935AA | 58566              | SRR3049909 |      |    | Europe        | United Kingdom | Enteritidis             | Enteritidis | 3888  | 7877 |
| SAL_EA6938AA | 56990              | SRR3049906 |      |    | Europe        | United Kingdom | Enteritidis             | Enteritidis | 1425  | 7875 |
| SAL_EA6939AA | 29236              | SRR3049905 |      |    | Europe        | United Kingdom | Enteritidis             | Enteritidis | 1425  | 7874 |
| SAL_EA6943AA | 21113              | SRR3049901 | 2014 | 6  | 4 Europe      | United Kingdom | Enteritidis             | Enteritidis | 3888  | 7870 |
| SAL_EA6946AA | 82008              | SRR3049897 |      |    | Europe        | United Kingdom | Enteritidis             | Enteritidis | 3888  | 3636 |
| SAL_EA6948AA | 103200             | SRR3049894 |      |    | Europe        | United Kingdom | Enteritidis             | Enteritidis | 3888  | 7867 |
| SAL_EA6950AA | 82520              | SRR3049891 |      |    | Europe        | United Kingdom | Enteritidis             | Enteritidis | 1425  | 7865 |
| SAL_EA6958AA | 18526              | SRR3049881 |      |    | Europe        | United Kingdom | Enteritidis             | Enteritidis | 1425  | 7858 |
| SAL_EA6960AA | 29961              | SRR3049879 |      |    | Europe        | United Kingdom | Enteritidis             | Enteritidis | 1425  | 7856 |
| SAL_EA6972AA | 6485               | SRR3049864 |      |    | Europe        | United Kingdom | Wелtevređen             | Enteritidis | 3906  | 7844 |
| SAL_EA6980AA | 37110              | SRR3049854 |      |    | Europe        | United Kingdom | Enteritidis             | Enteritidis | 1425  | 7836 |
| SAL_EA6981AA | 14134              | SRR3049853 |      |    | Europe        | United Kingdom | Enteritidis             | Enteritidis | 3897  | 7835 |
| SAL_EA6983AA | 21120              | SRR3049851 | 2014 | 6  | 2 Europe      | United Kingdom | Enteritidis             | Enteritidis | 3888  | 7833 |
| SAL_EA6985AA | 46131              | SRR3049849 |      |    | Europe        | United Kingdom | Enteritidis             | Enteritidis | 1425  | 7831 |
| SAL_EA6989AA | 21114              | SRR3049844 | 2014 | 6  | 4 Europe      | United Kingdom | Enteritidis             | Enteritidis | 3888  | 7827 |
| SAL_EA6990AA | 29277              | SRR3049843 |      |    | Europe        | United Kingdom | Enteritidis             | Enteritidis | 3888  | 7826 |
| SAL_EA6991AA | 6499               | SRR3049842 |      |    | Europe        | United Kingdom | Enteritidis             | Enteritidis | 1425  | 7825 |
| SAL_EA6992AA | 29276              | SRR3049841 |      |    | Europe        | United Kingdom | Enteritidis             | Enteritidis | 1425  | 7824 |
| SAL_EA6995AA | 21089              | SRR3049838 |      |    | Europe        | United Kingdom | Enteritidis             | Enteritidis | 1425  | 7821 |

|              |       |            |      |   |    |        |                |             |             |       |      |
|--------------|-------|------------|------|---|----|--------|----------------|-------------|-------------|-------|------|
| SAL_EA6997AA | 29307 | SRR3049835 |      |   |    | Europe | United Kingdom | Enteritidis | Enteritidis | 1425  | 3522 |
| SAL_EA7007AA | 56987 | SRR3049824 |      |   |    | Europe | United Kingdom | Enteritidis | Enteritidis | 3888  | 7810 |
| SAL_EA7010AA | 53043 | SRR3049821 |      |   |    | Europe | United Kingdom | Enteritidis | Enteritidis | 3888  | 7808 |
| SAL_EA7011AA | 82523 | SRR3049820 |      |   |    | Europe | United Kingdom | Enteritidis | Enteritidis | 1425  | 7807 |
| SAL_EA7013AA | 95234 | SRR3049818 |      |   |    | Europe | United Kingdom | Enteritidis | Enteritidis | 1425  | 7576 |
| SAL_EA7015AA | 60147 | SRR3049816 |      |   |    | Europe | United Kingdom | Enteritidis | Enteritidis | 1425  | 7804 |
| SAL_EA7020AA | 43937 | SRR3049811 | 2014 | 8 | 21 | Europe | United Kingdom | Enteritidis | Enteritidis | 3888  | 7799 |
| SAL_EA7026AA | 29310 | SRR3049804 |      |   |    | Europe | United Kingdom | Enteritidis | Enteritidis | 1425  | 7793 |
| SAL_EA7030AA | 29279 | SRR3049800 |      |   |    | Europe | United Kingdom | Enteritidis | Enteritidis | 1425  | 7789 |
| SAL_EA7031AA | 53074 | SRR3049799 |      |   |    | Europe | United Kingdom | Enteritidis | Enteritidis | 1425  | 304  |
| SAL_EA7034AA | 1514  | SRR3049796 | 2014 | 3 | 25 | Europe | United Kingdom | Enteritidis | Enteritidis | 3888  | 7786 |
| SAL_EA7036AA | 82514 | SRR3049793 |      |   |    | Europe | United Kingdom | Enteritidis | Enteritidis | 1425  | 7784 |
| SAL_EA7041AA | 25004 | SRR3049783 | 2014 | 7 | 3  | Europe | United Kingdom | Enteritidis | Enteritidis | 3888  | 7779 |
| SAL_EA7044AA | 7427  | SRR3049779 |      |   |    | Europe | United Kingdom | Enteritidis | Enteritidis | 3888  | 7776 |
| SAL_EA7045AA | 21065 | SRR3049778 | 2014 | 6 | 3  | Europe | United Kingdom | Enteritidis | Enteritidis | 33231 | 7775 |
| SAL_EA7047AA | 29308 | SRR3049775 | 2014 | 7 | 15 | Europe | United Kingdom | Enteritidis | Enteritidis | 3888  | 7773 |
| SAL_EA7049AA | 29977 | SRR3049773 |      |   |    | Europe | United Kingdom | Enteritidis | Enteritidis | 1425  | 7771 |
| SAL_EA7056AA | 99783 | SRR3049766 |      |   |    | Europe | United Kingdom | Enteritidis | Enteritidis | 1425  | 7764 |
| SAL_EA7057AA | 99750 | SRR3049765 |      |   |    | Europe | United Kingdom | Enteritidis | Enteritidis | 28005 | 7763 |
| SAL_EA7058AA | 97239 | SRR3049763 |      |   |    | Europe | United Kingdom | Enteritidis | Enteritidis | 3888  | 7762 |
| SAL_EA7063AA | 21847 | SRR3049752 |      |   |    | Europe | United Kingdom | Enteritidis | Enteritidis | 1425  | 7757 |
| SAL_EA7071AA | 18556 | SRR3049743 | 2014 | 6 | 6  | Europe | United Kingdom | Enteritidis | Enteritidis | 3888  | 7750 |
| SAL_EA7072AA | 18546 | SRR3049742 |      |   |    | Europe | United Kingdom | Enteritidis | Enteritidis | 1425  | 7749 |
| SAL_EA7076AA | 82013 | SRR3049736 |      |   |    | Europe | United Kingdom | Enteritidis | Enteritidis | 1425  | 7117 |
| SAL_EA7082AA | 21811 | SRR3049724 |      |   |    | Europe | United Kingdom | Enteritidis | Enteritidis | 3888  | 7740 |
| SAL_EA7083AA | 21844 | SRR3049723 | 2014 | 6 | 10 | Europe | United Kingdom | Enteritidis | Enteritidis | 3888  | 7739 |
| SAL_EA7084AA | 43960 | SRR3049722 | 2014 | 8 | 18 | Europe | United Kingdom | Enteritidis | Enteritidis | 3888  | 7738 |
| SAL_EA7086AA | 29972 | SRR3049720 | 2014 | 7 | 21 | Europe | United Kingdom | Enteritidis | Enteritidis | 3888  | 7736 |
| SAL_EA7091AA | 18550 | SRR3049715 |      |   |    | Europe | United Kingdom | Enteritidis | Enteritidis | 1425  | 7732 |
| SAL_EA7092AA | 58597 | SRR3049713 |      |   |    | Europe | United Kingdom | Enteritidis | Enteritidis | 1425  | 7731 |
| SAL_EA7096AA | 53050 | SRR3049708 |      |   |    | Europe | United Kingdom | Enteritidis | Enteritidis | 3888  | 7727 |
| SAL_EA7100AA | 7429  | SRR3049703 |      |   |    | Europe | United Kingdom | Enteritidis | Enteritidis | 1425  | 7723 |
| SAL_EA7101AA | 7428  | SRR3049702 |      |   |    | Europe | United Kingdom | Enteritidis | Enteritidis | 1425  | 7722 |
| SAL_EA7103AA | 21848 | SRR3049700 |      |   |    | Europe | United Kingdom | Enteritidis | Enteritidis | 3888  | 7720 |
| SAL_EA7105AA | 18627 | SRR3049698 |      |   |    | Europe | United Kingdom | Enteritidis | Enteritidis | 1425  | 7718 |
| SAL_EA7106AA | 15256 | SRR3049697 |      |   |    | Europe | United Kingdom | Enteritidis | Enteritidis | 1425  | 7717 |
| SAL_EA7108AA | 5859  | SRR3049694 |      |   |    | Europe | United Kingdom | Enteritidis | Enteritidis | 1425  | 7716 |
| SAL_EA7111AA | 58593 | SRR3049691 |      |   |    | Europe | United Kingdom | Enteritidis | Enteritidis | 1425  | 7713 |
| SAL_EA7112AA | 58599 | SRR3049690 |      |   |    | Europe | United Kingdom | Enteritidis | Enteritidis | 1425  | 7712 |
| SAL_EA7115AA | 58596 | SRR3049687 |      |   |    | Europe | United Kingdom | Enteritidis | Enteritidis | 1425  | 7710 |
| SAL_EA7131AA | 21121 | SRR3049665 |      |   |    | Europe | United Kingdom | Enteritidis | Enteritidis | 26142 | 7694 |
| SAL_EA7135AA | 21843 | SRR3049661 | 2014 | 6 | 1  | Europe | United Kingdom | Enteritidis | Enteritidis | 3888  | 674  |
| SAL_EA7141AA | 1513  | SRR3049653 |      |   |    | Europe | United Kingdom | Enteritidis | Enteritidis | 1425  | 7686 |
| SAL_EA7142AA | 58553 | SRR3049652 |      |   |    | Europe | United Kingdom | Enteritidis | Enteritidis | 3888  | 7685 |
| SAL_EA7144AA | 97870 | SRR3049650 |      |   |    | Europe | United Kingdom | Enteritidis | Enteritidis | 1425  | 7683 |
| SAL_EA7146AA | 45271 | SRR3049645 |      |   |    | Europe | United Kingdom | Enteritidis | Enteritidis | 1425  | 7681 |
| SAL_EA7150AA | 18533 | SRR3049640 |      |   |    | Europe | United Kingdom | Enteritidis | Enteritidis | 1425  | 7677 |
| SAL_EA7155AA | 43926 | SRR3049635 |      |   |    | Europe | United Kingdom | Enteritidis | Enteritidis | 1425  | 7672 |
| SAL_EA7160AA | 29242 | SRR3049630 |      |   |    | Europe | United Kingdom | Enteritidis | Enteritidis | 1425  | 7667 |
| SAL_EA7165AA | 1864  | SRR3049624 |      |   |    | Europe | United Kingdom | Enteritidis | Enteritidis | 1425  | 7662 |
| SAL_EA7167AA | 34190 | SRR3049621 | 2014 | 7 | 24 | Europe | United Kingdom | Enteritidis | Enteritidis | 3888  | 7660 |
| SAL_EA7170AA | 29240 | SRR3049617 |      |   |    | Europe | United Kingdom | Enteritidis | Enteritidis | 3888  | 7657 |
| SAL_EA7171AA | 82011 | SRR3049615 |      |   |    | Europe | United Kingdom | Enteritidis | Enteritidis | 1425  | 7656 |
| SAL_EA7173AA | 29966 | SRR3049612 |      |   |    | Europe | United Kingdom | Enteritidis | Enteritidis | 1425  | 7654 |
| SAL_EA7174AA | 18661 | SRR3049611 |      |   |    | Europe | United Kingdom | Enteritidis | Enteritidis | 1425  | 7653 |
| SAL_EA7177AA | 2305  | SRR3049608 |      |   |    | Europe | United Kingdom | Enteritidis | Enteritidis | 1425  | 7650 |
| SAL_EA7185AA | 21854 | SRR3049600 |      |   |    | Europe | United Kingdom | Enteritidis | Enteritidis | 1425  | 7642 |
| SAL_EA7186AA | 18513 | SRR3049599 |      |   |    | Europe | United Kingdom | Enteritidis | Enteritidis | 1425  | 7641 |
| SAL_EA7187AA | 6498  | SRR3049597 |      |   |    | Europe | United Kingdom | Enteritidis | Enteritidis | 1425  | 7640 |

|              |       |            |      |   |    |        |                |             |             |       |      |
|--------------|-------|------------|------|---|----|--------|----------------|-------------|-------------|-------|------|
| SAL_EA7189AA | 21840 | SRR3049594 |      |   |    | Europe | United Kingdom | Enteritidis | Enteritidis | 1425  | 7638 |
| SAL_EA7197AA | 21087 | SRR3049585 |      |   |    | Europe | United Kingdom | Enteritidis | Enteritidis | 3888  | 7630 |
| SAL_EA7199AA | 29286 | SRR3049583 |      |   |    | Europe | United Kingdom | Enteritidis | Enteritidis | 1425  | 7628 |
| SAL_EA7213AA | 48128 | SRR3049568 |      |   |    | Europe | United Kingdom | Enteritidis | Enteritidis | 1425  | 7615 |
| SAL_EA7215AA | 5853  | SRR3049566 |      |   |    | Europe | United Kingdom | Enteritidis | Enteritidis | 1425  | 7613 |
| SAL_EA7216AA | 29971 | SRR3049565 | 2014 | 7 | 21 | Europe | United Kingdom | Enteritidis | Enteritidis | 3888  | 7612 |
| SAL_EA7217AA | 20902 | SRR3049564 |      |   |    | Europe | United Kingdom | Enteritidis | Enteritidis | 1425  | 7611 |
| SAL_EA7219AA | 21084 | SRR3049562 |      |   |    | Europe | United Kingdom | Enteritidis | Enteritidis | 1425  | 7609 |
| SAL_EA7222AA | 1519  | SRR3049559 |      |   |    | Europe | United Kingdom | Enteritidis | Enteritidis | 3888  | 7606 |
| SAL_EA7231AA | 39517 | SRR3049549 | 2014 | 8 | 12 | Europe | United Kingdom | Enteritidis | Enteritidis | 3888  | 7599 |
| SAL_EA7236AA | 29287 | SRR3049544 |      |   |    | Europe | United Kingdom | Enteritidis | Enteritidis | 3888  | 7594 |
| SAL_EA7237AA | 20927 | SRR3049543 | 2014 | 6 | 8  | Europe | United Kingdom | Enteritidis | Enteritidis | 3888  | 7593 |
| SAL_EA7238AA | 48165 | SRR3049542 |      |   |    | Europe | United Kingdom | Enteritidis | Enteritidis | 3906  | 7592 |
| SAL_EA7247AA | 18638 | SRR3049533 |      |   |    | Europe | United Kingdom | Enteritidis | Enteritidis | 1425  | 7584 |
| SAL_EA7252AA | 18667 | SRR3049528 |      |   |    | Europe | United Kingdom | Enteritidis | Enteritidis | 1425  | 7580 |
| SAL_EA7254AA | 82553 | SRR3049526 |      |   |    | Europe | United Kingdom | Enteritidis | Enteritidis | 1425  | 7578 |
| SAL_EA7256AA | 97243 | SRR3049524 |      |   |    | Europe | United Kingdom | Enteritidis | Enteritidis | 1425  | 7576 |
| SAL_EA7257AA | 97253 | SRR3049523 |      |   |    | Europe | United Kingdom | Enteritidis | Enteritidis | 1425  | 7575 |
| SAL_EA7258AA | 82546 | SRR3049522 |      |   |    | Europe | United Kingdom | Enteritidis | Enteritidis | 1425  | 7574 |
| SAL_EA7266AA | 21812 | SRR3049514 |      |   |    | Europe | United Kingdom | Enteritidis | Enteritidis | 3888  | 7566 |
| SAL_EA7267AA | 43958 | SRR3049513 | 2014 | 8 | 18 | Europe | United Kingdom | Enteritidis | Enteritidis | 3888  | 7565 |
| SAL_EA7268AA | 40325 | SRR3049512 |      |   |    | Europe | United Kingdom | Enteritidis | Enteritidis | 1425  | 7564 |
| SAL_EA7272AA | 18528 | SRR3049508 |      |   |    | Europe | United Kingdom | Enteritidis | Enteritidis | 1425  | 7560 |
| SAL_EA7277AA | 20926 | SRR3049503 | 2014 | 6 | 7  | Europe | United Kingdom | Enteritidis | Enteritidis | 3888  | 7555 |
| SAL_EA7278AA | 20929 | SRR3049502 | 2014 | 6 | 3  | Europe | United Kingdom | Enteritidis | Enteritidis | 3888  | 7554 |
| SAL_EA7283AA | 58595 | SRR3049495 |      |   |    | Europe | United Kingdom | Enteritidis | Enteritidis | 1425  | 7550 |
| SAL_EA7284AA | 43925 | SRR3049494 | 2014 | 8 | 13 | Europe | United Kingdom | Enteritidis | Enteritidis | 3888  | 7549 |
| SAL_EA7297AA | 2308  | SRR3049481 |      |   |    | Europe | United Kingdom | Enteritidis | Enteritidis | 1425  | 7537 |
| SAL_EA7299AA | 56993 | SRR3049479 |      |   |    | Europe | United Kingdom | Enteritidis | Enteritidis | 1425  | 7535 |
| SAL_EA7300AA | 45218 | SRR3049478 |      |   |    | Europe | United Kingdom | Enteritidis | Enteritidis | 1425  | 7534 |
| SAL_EA7302AA | 43938 | SRR3049476 |      |   |    | Europe | United Kingdom | Enteritidis | Enteritidis | 3888  | 7532 |
| SAL_EA7305AA | 29306 | SRR3049473 |      |   |    | Europe | United Kingdom | Enteritidis | Enteritidis | 1425  | 7529 |
| SAL_EA7315AA | 1517  | SRR3049463 |      |   |    | Europe | United Kingdom | Enteritidis | Enteritidis | 1425  | 7520 |
| SAL_EA7316AA | 95223 | SRR3049462 |      |   |    | Europe | United Kingdom | Enteritidis | Enteritidis | 28005 | 7519 |
| SAL_EA7318AA | 56994 | SRR3049460 |      |   |    | Europe | United Kingdom | Enteritidis | Enteritidis | 1425  | 7517 |
| SAL_EA7325AA | 58582 | SRR3049453 |      |   |    | Europe | United Kingdom | Enteritidis | Enteritidis | 1425  | 7510 |
| SAL_EA7331AA | 29964 | SRR3049446 |      |   |    | Europe | United Kingdom | Enteritidis | Enteritidis | 1425  | 7504 |
| SAL_EA7332AA | 15209 | SRR3049445 |      |   |    | Europe | United Kingdom | Enteritidis | Enteritidis | 1425  | 7503 |
| SAL_EA7333AA | 21867 | SRR3049444 |      |   |    | Europe | United Kingdom | Enteritidis | Enteritidis | 1425  | 7502 |
| SAL_EA7334AA | 20925 | SRR3049443 | 2014 | 6 | 6  | Europe | United Kingdom | Enteritidis | Enteritidis | 3888  | 674  |
| SAL_EA7340AA | 58592 | SRR3049437 |      |   |    | Europe | United Kingdom | Enteritidis | Enteritidis | 1425  | 7496 |
| SAL_EA7341AA | 77332 | SRR3049436 |      |   |    | Europe | United Kingdom | Enteritidis | Enteritidis | 1425  | 7495 |
| SAL_EA7348AA | 82548 | SRR3049429 |      |   |    | Europe | United Kingdom | Enteritidis | Enteritidis | 1425  | 7489 |
| SAL_EA7353AA | 7436  | SRR3049423 |      |   |    | Europe | United Kingdom | Enteritidis | Enteritidis | 1425  | 7486 |
| SAL_EA7354AA | 5852  | SRR3049422 |      |   |    | Europe | United Kingdom | Enteritidis | Enteritidis | 1425  | 7485 |
| SAL_EA7364AA | 29311 | SRR3049412 |      |   |    | Europe | United Kingdom | Enteritidis | Enteritidis | 1425  | 7475 |
| SAL_EA7367AA | 29281 | SRR3049409 | 2014 | 7 | 11 | Europe | United Kingdom | Enteritidis | Enteritidis | 3888  | 7473 |
| SAL_EA7368AA | 53066 | SRR3049408 |      |   |    | Europe | United Kingdom | Enteritidis | Enteritidis | 3888  | 7472 |
| SAL_EA7378AA | 21096 | SRR3049397 |      |   |    | Europe | United Kingdom | Enteritidis | Enteritidis | 1425  | 7462 |
| SAL_EA7380AA | 15243 | SRR3049395 |      |   |    | Europe | United Kingdom | Enteritidis | Enteritidis | 1425  | 7460 |
| SAL_EA7384AA | 18579 | SRR3049391 |      |   |    | Europe | United Kingdom | Enteritidis | Enteritidis | 1425  | 7457 |
| SAL_EA7391AA | 69751 | SRR3049383 |      |   |    | Europe | United Kingdom | Enteritidis | Enteritidis | 3888  | 7452 |
| SAL_EA7396AA | 15230 | SRR3049378 |      |   |    | Europe | United Kingdom | Enteritidis | Enteritidis | 26142 | 7447 |
| SAL_EA7400AA | 3780  | SRR3049374 |      |   |    | Europe | United Kingdom | Enteritidis | Enteritidis | 1425  | 7443 |
| SAL_EA7402AA | 3777  | SRR3049372 |      |   |    | Europe | United Kingdom | Enteritidis | Enteritidis | 1425  | 7441 |
| SAL_EA7405AA | 99738 | SRR3049369 |      |   |    | Europe | United Kingdom | Enteritidis | Enteritidis | 1425  | 7438 |
| SAL_EA7407AA | 18531 | SRR3049367 | 2014 | 6 | 4  | Europe | United Kingdom | Enteritidis | Enteritidis | 1425  | 7436 |
| SAL_EA7408AA | 18554 | SRR3049366 | 2014 | 6 | 6  | Europe | United Kingdom | Enteritidis | Enteritidis | 3888  | 7435 |
| SAL_EA7409AA | 45269 | SRR3049365 | 2014 | 8 | 27 | Europe | United Kingdom | Enteritidis | Enteritidis | 3888  | 7434 |

|              |        |            |      |   |    |        |                |             |             |       |      |
|--------------|--------|------------|------|---|----|--------|----------------|-------------|-------------|-------|------|
| SAL_EA7411AA | 20924  | SRR3049363 |      |   |    | Europe | United Kingdom | Enteritidis | Enteritidis | 1425  | 7432 |
| SAL_EA7415AA | 29282  | SRR3049359 |      |   |    | Europe | United Kingdom | Enteritidis | Enteritidis | 1425  | 7428 |
| SAL_EA7416AA | 77344  | SRR3049358 |      |   |    | Europe | United Kingdom | Enteritidis | Enteritidis | 1425  | 6087 |
| SAL_EA7417AA | 58594  | SRR3049357 |      |   |    | Europe | United Kingdom | Enteritidis | Enteritidis | 1425  | 7427 |
| SAL_EA7418AA | 15207  | SRR3049356 |      |   |    | Europe | United Kingdom | Enteritidis | Enteritidis | 26495 | 7426 |
| SAL_EA7420AA | 53076  | SRR3049354 | 2014 | 9 | 30 | Europe | United Kingdom | Enteritidis | Enteritidis | 1425  | 7424 |
| SAL_EA7422AA | 53068  | SRR3049352 |      |   |    | Europe | United Kingdom | Enteritidis | Enteritidis | 1425  | 7422 |
| SAL_EA7423AA | 20932  | SRR3049351 |      |   |    | Europe | United Kingdom | Enteritidis | Enteritidis | 1425  | 7421 |
| SAL_EA7431AA | 40364  | SRR3049342 |      |   |    | Europe | United Kingdom | Enteritidis | Enteritidis | 3888  | 7415 |
| SAL_EA7432AA | 6497   | SRR3049341 |      |   |    | Europe | United Kingdom | Enteritidis | Enteritidis | 33220 | 7414 |
| SAL_EA7441AA | 56961  | SRR3049331 |      |   |    | Europe | United Kingdom | Enteritidis | Enteritidis | 1425  | 7406 |
| SAL_EA7447AA | 97270  | SRR3049325 |      |   |    | Europe | United Kingdom | Enteritidis | Enteritidis | 1425  | 2479 |
| SAL_EA7448AA | 37102  | SRR3049323 |      |   |    | Europe | United Kingdom | Enteritidis | Enteritidis | 1425  | 7400 |
| SAL_EA7449AA | 46155  | SRR3049322 | 2014 | 8 | 27 | Europe | United Kingdom | Enteritidis | Enteritidis | 3888  | 7399 |
| SAL_EA7451AA | 46130  | SRR3049320 |      |   |    | Europe | United Kingdom | Enteritidis | Enteritidis | 1425  | 7397 |
| SAL_EA7455AA | 18637  | SRR3049316 |      |   |    | Europe | United Kingdom | Enteritidis | Enteritidis | 3888  | 7393 |
| SAL_EA7460AA | 48187  | SRR3049311 |      |   |    | Europe | United Kingdom | Enteritidis | Enteritidis | 1425  | 7388 |
| SAL_EA7463AA | 48156  | SRR3049308 |      |   |    | Europe | United Kingdom | Enteritidis | Enteritidis | 1425  | 7385 |
| SAL_EA7464AA | 18590  | SRR3049307 |      |   |    | Europe | United Kingdom | Enteritidis | Enteritidis | 1425  | 7384 |
| SAL_EA7465AA | 29272  | SRR3049306 |      |   |    | Europe | United Kingdom | Enteritidis | Enteritidis | 1425  | 7383 |
| SAL_EA7467AA | 21116  | SRR3049304 | 2014 | 6 | 4  | Europe | United Kingdom | Enteritidis | Enteritidis | 3888  | 7381 |
| SAL_EA7481AA | 18524  | SRR3049288 |      |   |    | Europe | United Kingdom | Enteritidis | Enteritidis | 3888  | 7367 |
| SAL_EA7490AA | 1512   | SRR3049279 |      |   |    | Europe | United Kingdom | Enteritidis | Enteritidis | 1425  | 7358 |
| SAL_EA7496AA | 98285  | SRR3049273 |      |   |    | Europe | United Kingdom | Enteritidis | Enteritidis | 1425  | 7352 |
| SAL_EA7497AA | 97248  | SRR3049272 |      |   |    | Europe | United Kingdom | Enteritidis | Enteritidis | 1425  | 7351 |
| SAL_EA7498AA | 21126  | SRR3049271 |      |   |    | Europe | United Kingdom | Enteritidis | Enteritidis | 1425  | 7350 |
| SAL_EA7504AA | 18555  | SRR3049265 | 2014 | 6 | 6  | Europe | United Kingdom | Enteritidis | Enteritidis | 3888  | 7344 |
| SAL_EA7507AA | 53061  | SRR3049262 |      |   |    | Europe | United Kingdom | Enteritidis | Enteritidis | 3888  | 7341 |
| SAL_EA7513AA | 37077  | SRR3049256 |      |   |    | Europe | United Kingdom | Enteritidis | Enteritidis | 1425  | 7335 |
| SAL_EA7519AA | 95061  | SRR3049250 |      |   |    | Europe | United Kingdom | Enteritidis | Enteritidis | 1425  | 7329 |
| SAL_EA7524AA | 29960  | SRR3049245 | 2014 | 7 | 23 | Europe | United Kingdom | Enteritidis | Enteritidis | 1425  | 7324 |
| SAL_EA7528AA | 43929  | SRR3049241 |      |   |    | Europe | United Kingdom | Enteritidis | Enteritidis | 1425  | 7320 |
| SAL_EA7529AA | 18577  | SRR3049240 | 2014 | 6 | 6  | Europe | United Kingdom | Enteritidis | Enteritidis | 1425  | 7319 |
| SAL_EA7531AA | 15210  | SRR3049238 |      |   |    | Europe | United Kingdom | Enteritidis | Enteritidis | 3888  | 7317 |
| SAL_EA7534AA | 100720 | SRR3049235 |      |   |    | Europe | United Kingdom | Enteritidis | Enteritidis | 1425  | 7314 |
| SAL_EA7535AA | 9196   | SRR3049234 |      |   |    | Europe | United Kingdom | Enteritidis | Enteritidis | 1425  | 7313 |
| SAL_EA7540AA | 21868  | SRR3049229 | 2014 | 6 | 11 | Europe | United Kingdom | Enteritidis | Enteritidis | 3888  | 7309 |
| SAL_EA7546AA | 97251  | SRR3049223 |      |   |    | Europe | United Kingdom | Enteritidis | Enteritidis | 1425  | 7303 |
| SAL_EA7548AA | 6500   | SRR3049221 |      |   |    | Europe | United Kingdom | Enteritidis | Enteritidis | 1425  | 7301 |
| SAL_EA7550AA | 29963  | SRR3049219 |      |   |    | Europe | United Kingdom | Enteritidis | Enteritidis | 1425  | 7299 |
| SAL_EA7552AA | 20913  | SRR3049217 |      |   |    | Europe | United Kingdom | Enteritidis | Enteritidis | 1425  | 7297 |
| SAL_EA7556AA | 15239  | SRR3049213 |      |   |    | Europe | United Kingdom | Enteritidis | Enteritidis | 1425  | 7293 |
| SAL_EA7557AA | 82010  | SRR3049212 |      |   |    | Europe | United Kingdom | Enteritidis | Enteritidis | 3888  | 7292 |
| SAL_EA7565AA | 18532  | SRR3049204 |      |   |    | Europe | United Kingdom | Enteritidis | Enteritidis | 1425  | 7284 |
| SAL_EA7570AA | 25185  | SRR3049199 |      |   |    | Europe | United Kingdom | Enteritidis | Enteritidis | 1425  | 7279 |
| SAL_EA7573AA | 18523  | SRR3049196 |      |   |    | Europe | United Kingdom | Enteritidis | Enteritidis | 3888  | 7276 |
| SAL_EA7577AA | 15244  | SRR3049192 |      |   |    | Europe | United Kingdom | Enteritidis | Enteritidis | 1425  | 7272 |
| SAL_EA7578AA | 21846  | SRR3049191 | 2014 | 6 | 9  | Europe | United Kingdom | Enteritidis | Enteritidis | 3888  | 7271 |
| SAL_EA7579AA | 48158  | SRR3049190 |      |   |    | Europe | United Kingdom | Enteritidis | Enteritidis | 1425  | 7270 |
| SAL_EA7582AA | 43936  | SRR3049187 | 2014 | 8 | 21 | Europe | United Kingdom | Enteritidis | Enteritidis | 3888  | 7267 |
| SAL_EA7586AA | 3784   | SRR3049183 |      |   |    | Europe | United Kingdom | Enteritidis | Enteritidis | 1425  | 7263 |
| SAL_EA7587AA | 53041  | SRR3049182 |      |   |    | Europe | United Kingdom | Enteritidis | Enteritidis | 1425  | 7262 |
| SAL_EA7592AA | 2307   | SRR3049177 |      |   |    | Europe | United Kingdom | Enteritidis | Enteritidis | 1425  | 7257 |
| SAL_EA7595AA | 82521  | SRR3049174 |      |   |    | Europe | United Kingdom | Enteritidis | Enteritidis | 1425  | 7254 |
| SAL_EA7599AA | 48161  | SRR3049170 | 2014 | 8 | 24 | Europe | United Kingdom | Enteritidis | Enteritidis | 3888  | 7250 |
| SAL_EA7600AA | 46097  | SRR3049169 |      |   |    | Europe | United Kingdom | Enteritidis | Enteritidis | 1425  | 7249 |
| SAL_EA7608AA | 21841  | SRR3049161 |      |   |    | Europe | United Kingdom | Enteritidis | Enteritidis | 3888  | 7241 |
| SAL_EA7611AA | 21813  | SRR3049158 |      |   |    | Europe | United Kingdom | Enteritidis | Enteritidis | 3888  | 7238 |
| SAL_EA7612AA | 43968  | SRR3049157 |      |   |    | Europe | United Kingdom | Enteritidis | Enteritidis | 1425  | 7237 |

|              |       |            |      |   |           |                |                         |             |       |      |
|--------------|-------|------------|------|---|-----------|----------------|-------------------------|-------------|-------|------|
| SAL_EA7614AA | 29275 | SRR3049155 |      |   | Europe    | United Kingdom | Enteritidis             | Enteritidis | 1425  | 7235 |
| SAL_EA7615AA | 43928 | SRR3049154 |      |   | Europe    | United Kingdom | Enteritidis             | Enteritidis | 3888  | 7234 |
| SAL_EA7617AA | 1516  | SRR3049152 |      |   | Europe    | United Kingdom | Enteritidis             | Enteritidis | 1425  | 7232 |
| SAL_EA7621AA | 95249 | SRR3049148 |      |   | Europe    | United Kingdom | Enteritidis             | Enteritidis | 1425  | 7228 |
| SAL_EA7626AA | 20934 | SRR3049143 |      |   | Europe    | United Kingdom | Enteritidis (Predicted) | Enteritidis | 1425  | 7223 |
| SAL_EA7627AA | 60362 | SRR3049142 |      |   | Europe    | United Kingdom | Enteritidis             | Enteritidis | 3888  | 7222 |
| SAL_EA7633AA | 29976 | SRR3049136 |      |   | Europe    | United Kingdom | Enteritidis             | Enteritidis | 1425  | 7216 |
| SAL_EA7635AA | 43930 | SRR3049134 | 2014 | 8 | 14 Europe | United Kingdom | Enteritidis             | Enteritidis | 3888  | 7214 |
| SAL_EA7639AA | 82006 | SRR3049130 |      |   | Europe    | United Kingdom | Enteritidis             | Enteritidis | 1425  | 7210 |
| SAL_EA7641AA | 2310  | SRR3049128 |      |   | Europe    | United Kingdom | Enteritidis             | Enteritidis | 1425  | 7208 |
| SAL_EA7643AA | 40362 | SRR3049126 |      |   | Europe    | United Kingdom | Enteritidis             | Enteritidis | 1425  | 7206 |
| SAL_EA7644AA | 43884 | SRR3049125 | 2014 | 8 | 13 Europe | United Kingdom | Enteritidis             | Enteritidis | 3888  | 7205 |
| SAL_EA7646AA | 21818 | SRR3049123 |      |   | Europe    | United Kingdom | Enteritidis             | Enteritidis | 1425  | 7203 |
| SAL_EA7648AA | 45234 | SRR3049121 |      |   | Europe    | United Kingdom | Enteritidis             | Enteritidis | 3888  | 7201 |
| SAL_EA7653AA | 6482  | SRR3049116 |      |   | Europe    | United Kingdom | Enteritidis             | Enteritidis | 1425  | 7196 |
| SAL_EA7665AA | 20909 | SRR3049104 | 2014 | 4 | 6 Europe  | United Kingdom | Enteritidis             | Enteritidis | 3888  | 674  |
| SAL_EA7669AA | 82516 | SRR3049100 |      |   | Europe    | United Kingdom | Enteritidis             | Enteritidis | 1425  | 7183 |
| SAL_EA7671AA | 95227 | SRR3049098 |      |   | Europe    | United Kingdom | Enteritidis             | Enteritidis | 1425  | 7181 |
| SAL_EA7675AA | 21117 | SRR3049094 | 2014 | 6 | 4 Europe  | United Kingdom | Enteritidis             | Enteritidis | 3888  | 7177 |
| SAL_EA7677AA | 21119 | SRR3049092 | 2014 | 6 | 4 Europe  | United Kingdom | Enteritidis             | Enteritidis | 3888  | 7175 |
| SAL_EA7678AA | 43933 | SRR3049091 |      |   | Europe    | United Kingdom | Enteritidis             | Enteritidis | 1425  | 7174 |
| SAL_EA7682AA | 21102 | SRR3049087 |      |   | Europe    | United Kingdom | Enteritidis             | Enteritidis | 1425  | 7170 |
| SAL_EA7684AA | 19662 | SRR3049085 |      |   | Europe    | United Kingdom | Enteritidis             | Enteritidis | 1425  | 7168 |
| SAL_EA7689AA | 20928 | SRR3049080 |      |   | Europe    | United Kingdom | Enteritidis             | Enteritidis | 1425  | 7163 |
| SAL_EA7693AA | 48152 | SRR3049076 |      |   | Europe    | United Kingdom | Enteritidis             | Enteritidis | 3888  | 7159 |
| SAL_EA7694AA | 29284 | SRR3049075 |      |   | Europe    | United Kingdom | Enteritidis             | Enteritidis | 1425  | 7158 |
| SAL_EA7696AA | 18588 | SRR3049073 |      |   | Europe    | United Kingdom | Enteritidis             | Enteritidis | 3888  | 7156 |
| SAL_EA7699AA | 29280 | SRR3049070 | 2014 | 7 | 11 Europe | United Kingdom | Enteritidis             | Enteritidis | 3888  | 7153 |
| SAL_EA7701AA | 56991 | SRR3049068 | 2014 | 9 | 30 Europe | United Kingdom | Enteritidis             | Enteritidis | 3888  | 7151 |
| SAL_EA7702AA | 53036 | SRR3049067 | 2014 | 9 | 23 Europe | United Kingdom | Enteritidis             | Enteritidis | 3888  | 674  |
| SAL_EA7703AA | 82519 | SRR3049066 |      |   | Europe    | United Kingdom | Enteritidis             | Enteritidis | 1425  | 7150 |
| SAL_EA7705AA | 95229 | SRR3049064 |      |   | Europe    | United Kingdom | Enteritidis             | Enteritidis | 1425  | 7149 |
| SAL_EA7706AA | 18529 | SRR3049063 |      |   | Europe    | United Kingdom | Enteritidis             | Enteritidis | 3888  | 7148 |
| SAL_EA7708AA | 20903 | SRR3049061 | 2014 | 6 | 5 Europe  | United Kingdom | Enteritidis             | Enteritidis | 1425  | 7146 |
| SAL_EA7709AA | 21849 | SRR3049060 |      |   | Europe    | United Kingdom | Enteritidis             | Enteritidis | 1425  | 7145 |
| SAL_EA7710AA | 29285 | SRR3049059 |      |   | Europe    | United Kingdom | Enteritidis             | Enteritidis | 28005 | 7144 |
| SAL_EA7711AA | 15211 | SRR3049058 |      |   | Europe    | United Kingdom | Enteritidis             | Enteritidis | 33215 | 7143 |
| SAL_EA7713AA | 21124 | SRR3049056 |      |   | Europe    | United Kingdom | Enteritidis             | Enteritidis | 1425  | 7141 |
| SAL_EA7723AA | 82012 | SRR3049046 |      |   | Europe    | United Kingdom | Enteritidis             | Enteritidis | 1425  | 7131 |
| SAL_EA7737AA | 21118 | SRR3049031 |      |   | Europe    | United Kingdom | Enteritidis             | Enteritidis | 1425  | 7117 |
| SAL_EA7746AA | 45232 | SRR3049020 |      |   | Europe    | United Kingdom | Enteritidis             | Enteritidis | 1425  | 7108 |
| SAL_EA7747AA | 21820 | SRR3049019 |      |   | Europe    | United Kingdom | Enteritidis             | Enteritidis | 3888  | 7107 |
| SAL_EA7749AA | 21086 | SRR3049017 |      |   | Europe    | United Kingdom | Enteritidis             | Enteritidis | 3888  | 7105 |
| SAL_EA7752AA | 58576 | SRR3049014 | 2014 | 9 | 28 Europe | United Kingdom | Enteritidis             | Enteritidis | 3888  | 7102 |
| SAL_EA7753AA | 29289 | SRR3049013 |      |   | Europe    | United Kingdom | Enteritidis             | Enteritidis | 1425  | 7101 |
| SAL_EA7757AA | 53039 | SRR3049009 |      |   | Europe    | United Kingdom | Enteritidis             | Enteritidis | 1425  | 7097 |
| SAL_EA7763AA | 21132 | SRR3048999 | 2014 | 5 | 31 Europe | United Kingdom | Enteritidis             | Enteritidis | -1672 | 7091 |
| SAL_EA7764AA | 29962 | SRR3048998 |      |   | Europe    | United Kingdom | Enteritidis             | Enteritidis | 1425  | 7090 |
| SAL_EA7772AA | 18659 | SRR3048990 |      |   | Europe    | United Kingdom | Enteritidis             | Enteritidis | 1425  | 7083 |
| SAL_EA7779AA | 60145 | SRR3048983 |      |   | Europe    | United Kingdom | Enteritidis             | Enteritidis | 1425  | 7077 |
| SAL_EA7787AA | 21091 | SRR3048975 | 2014 | 6 | 3 Europe  | United Kingdom | Enteritidis             | Enteritidis | 1425  | 7069 |
| SAL_EA7788AA | 43932 | SRR3048974 |      |   | Europe    | United Kingdom | Enteritidis             | Enteritidis | 1425  | 7068 |
| SAL_EA7797AA | 19667 | SRR3048965 |      |   | Europe    | United Kingdom | Enteritidis             | Enteritidis | 1425  | 7060 |
| SAL_EA7808AA | 46125 | SRR3048951 | 2014 | 8 | 23 Europe | United Kingdom | Enteritidis             | Enteritidis | 3888  | 7049 |
| SAL_EA7809AA | 48160 | SRR3048950 |      |   | Europe    | United Kingdom | Enteritidis             | Enteritidis | 1425  | 7048 |
| SAL_EA7810AA | 45249 | SRR3048949 |      |   | Europe    | United Kingdom | Enteritidis             | Enteritidis | 1425  | 7047 |
| SAL_EA7811AA | 43939 | SRR3048947 |      |   | Europe    | United Kingdom | Enteritidis             | Enteritidis | 3888  | 7046 |
| SAL_EA7814AA | 77331 | SRR3048944 |      |   | Europe    | United Kingdom | Enteritidis             | Enteritidis | 1425  | 7043 |
| SAL_EA7822AA | 20930 | SRR3048935 |      |   | Europe    | United Kingdom | Enteritidis             | Enteritidis | 1425  | 7035 |

|              |        |            |      |   |    |        |                |             |             |       |      |
|--------------|--------|------------|------|---|----|--------|----------------|-------------|-------------|-------|------|
| SAL_EA7824AA | 29970  | SRR3048933 | 2014 | 7 | 21 | Europe | United Kingdom | Enteritidis | Enteritidis | 3888  | 7033 |
| SAL_EA7836AA | 95232  | SRR3048920 |      |   |    | Europe | United Kingdom | Enteritidis | Enteritidis | 1425  | 7021 |
| SAL_EA7842AA | 18589  | SRR3048912 |      |   |    | Europe | United Kingdom | Enteritidis | Enteritidis | 1425  | 7015 |
| SAL_EA7850AA | 21088  | SRR3048902 |      |   |    | Europe | United Kingdom | Enteritidis | Enteritidis | 1425  | 7008 |
| SAL_EA7851AA | 53013  | SRR3048901 |      |   |    | Europe | United Kingdom | Enteritidis | Enteritidis | 1425  | 7007 |
| SAL_EA7867AA | 21122  | SRR3048883 |      |   |    | Europe | United Kingdom | Enteritidis | Enteritidis | 33209 | 6991 |
| SAL_EA7873AA | 1863   | SRR3048877 |      |   |    | Europe | United Kingdom | Enteritidis | Enteritidis | 1425  | 6986 |
| SAL_EA7874AA | 56992  | SRR3048876 |      |   |    | Europe | United Kingdom | Enteritidis | Enteritidis | 3888  | 6985 |
| SAL_EA7887AA | 18525  | SRR3048861 |      |   |    | Europe | United Kingdom | Enteritidis | Enteritidis | 3888  | 6973 |
| SAL_EA7890AA | 18527  | SRR3048858 |      |   |    | Europe | United Kingdom | Enteritidis | Enteritidis | 26142 | 6970 |
| SAL_EA7895AA | 20933  | SRR3048853 |      |   |    | Europe | United Kingdom | Enteritidis | Enteritidis | 3888  | 2007 |
| SAL_EA7896AA | 58602  | SRR3048852 |      |   |    | Europe | United Kingdom | Enteritidis | Enteritidis | 1425  | 6965 |
| SAL_EA7898AA | 82509  | SRR3048850 |      |   |    | Europe | United Kingdom | Enteritidis | Enteritidis | 1425  | 6963 |
| SAL_EA7902AA | 25172  | SRR3048846 |      |   |    | Europe | United Kingdom | Enteritidis | Enteritidis | 1425  | 6959 |
| SAL_EA7904AA | 43909  | SRR3048844 | 2014 | 8 | 21 | Europe | United Kingdom | Enteritidis | Enteritidis | 3888  | 6957 |
| SAL_EA7908AA | 21085  | SRR3048840 |      |   |    | Europe | United Kingdom | Enteritidis | Enteritidis | 1425  | 6917 |
| SAL_EA7910AA | 53035  | SRR3048838 |      |   |    | Europe | United Kingdom | Enteritidis | Enteritidis | 1425  | 6952 |
| SAL_EA7912AA | 56960  | SRR3048836 |      |   |    | Europe | United Kingdom | Enteritidis | Enteritidis | 3888  | 6951 |
| SAL_EA7917AA | 97250  | SRR3048831 |      |   |    | Europe | United Kingdom | Enteritidis | Enteritidis | 1425  | 6946 |
| SAL_EA7919AA | 21851  | SRR3048829 |      |   |    | Europe | United Kingdom | Enteritidis | Enteritidis | 1425  | 6944 |
| SAL_EA7921AA | 48157  | SRR3048827 |      |   |    | Europe | United Kingdom | Enteritidis | Enteritidis | 3888  | 6942 |
| SAL_EA7931AA | 95264  | SRR3048817 |      |   |    | Europe | United Kingdom | Enteritidis | Enteritidis | 1425  | 6932 |
| SAL_EA7936AA | 48162  | SRR3048812 |      |   |    | Europe | United Kingdom | Enteritidis | Enteritidis | 1425  | 6927 |
| SAL_EA7937AA | 48167  | SRR3048811 |      |   |    | Europe | United Kingdom | Enteritidis | Enteritidis | 1425  | 6926 |
| SAL_EA7939AA | 21068  | SRR3048808 |      |   |    | Europe | United Kingdom | Enteritidis | Enteritidis | 1425  | 6924 |
| SAL_EA7940AA | 43935  | SRR3048807 |      |   |    | Europe | United Kingdom | Enteritidis | Enteritidis | 1425  | 6923 |
| SAL_EA7941AA | 20923  | SRR3048806 |      |   |    | Europe | United Kingdom | Enteritidis | Enteritidis | 3888  | 6922 |
| SAL_EA7945AA | 29958  | SRR3048802 |      |   |    | Europe | United Kingdom | Enteritidis | Enteritidis | 1425  | 6918 |
| SAL_EA7946AA | 20931  | SRR3048801 |      |   |    | Europe | United Kingdom | Enteritidis | Enteritidis | 1425  | 6917 |
| SAL_EA7948AA | 18660  | SRR3048799 |      |   |    | Europe | United Kingdom | Enteritidis | Enteritidis | 26142 | 6915 |
| SAL_EA7957AA | 2283   | SRR3048790 |      |   |    | Europe | United Kingdom | Enteritidis | Enteritidis | 3888  | 6906 |
| SAL_EA7958AA | 91975  | SRR3048789 |      |   |    | Europe | United Kingdom | Enteritidis | Enteritidis | 1425  | 6905 |
| SAL_EA7959AA | 91996  | SRR3048788 |      |   |    | Europe | United Kingdom | Enteritidis | Enteritidis | 1425  | 6904 |
| SAL_EA7962AA | 21810  | SRR3048785 | 2014 | 6 | 6  | Europe | United Kingdom | Enteritidis | Enteritidis | 3888  | 6902 |
| SAL_EA7963AA | 43959  | SRR3048784 |      |   |    | Europe | United Kingdom | Enteritidis | Enteritidis | 1425  | 6901 |
| SAL_EA7964AA | 29939  | SRR3048783 |      |   |    | Europe | United Kingdom | Enteritidis | Enteritidis | 1425  | 6900 |
| SAL_EA7967AA | 20938  | SRR3048780 |      |   |    | Europe | United Kingdom | Enteritidis | Enteritidis | 1425  | 6897 |
| SAL_EA7975AA | 48146  | SRR3048770 |      |   |    | Europe | United Kingdom | Enteritidis | Enteritidis | 1425  | 6889 |
| SAL_EA7978AA | 29278  | SRR3048766 |      |   |    | Europe | United Kingdom | Enteritidis | Enteritidis | 1425  | 6886 |
| SAL_EA7984AA | 56989  | SRR3048760 |      |   |    | Europe | United Kingdom | Enteritidis | Enteritidis | 1425  | 6880 |
| SAL_EA7999AA | 100723 | SRR3048725 |      |   |    | Europe | United Kingdom | Enteritidis | Enteritidis | 1425  | 6865 |
| SAL_EA8002AA | 19668  | SRR3048722 |      |   |    | Europe | United Kingdom | Enteritidis | Enteritidis | 1425  | 6863 |
| SAL_EA8003AA | 29973  | SRR3048721 |      |   |    | Europe | United Kingdom | Enteritidis | Enteritidis | 3888  | 6862 |
| SAL_EA8005AA | 56988  | SRR3048719 |      |   |    | Europe | United Kingdom | Enteritidis | Enteritidis | 1425  | 6860 |
| SAL_EA8006AA | 18572  | SRR3048718 |      |   |    | Europe | United Kingdom | Enteritidis | Enteritidis | 1425  | 6859 |
| SAL_EA8008AA | 56935  | SRR3048716 | 2014 | 8 | 1  | Europe | United Kingdom | Enteritidis | Enteritidis | 3888  | 2066 |
| SAL_EA8011AA | 2309   | SRR3048713 |      |   |    | Europe | United Kingdom | Enteritidis | Enteritidis | 1425  | 6855 |
| SAL_EA8019AA | 15238  | SRR3048703 |      |   |    | Europe | United Kingdom | Enteritidis | Enteritidis | 1425  | 6847 |
| SAL_EA8029AA | 29968  | SRR3048691 |      |   |    | Europe | United Kingdom | Enteritidis | Enteritidis | 1425  | 6837 |
| SAL_EA8030AA | 6481   | SRR3048690 |      |   |    | Europe | United Kingdom | Enteritidis | Enteritidis | 1425  | 6836 |
| SAL_EA8040AA | 15236  | SRR3048680 |      |   |    | Europe | United Kingdom | Enteritidis | Enteritidis | 1425  | 6826 |
| SAL_EA8043AA | 58600  | SRR3048656 |      |   |    | Europe | United Kingdom | Enteritidis | Enteritidis | 3888  | 6823 |
| SAL_EA8047AA | 82007  | SRR3048603 |      |   |    | Europe | United Kingdom | Enteritidis | Enteritidis | 1425  | 6819 |
| SAL_EA8049AA | 18557  | SRR3048580 | 2014 | 6 | 6  | Europe | United Kingdom | Enteritidis | Enteritidis | 3888  | 6818 |
| SAL_EA8050AA | 21845  | SRR3048579 | 2014 | 6 | 10 | Europe | United Kingdom | Enteritidis | Enteritidis | 3888  | 6817 |
| SAL_EA8057AA | 29299  | SRR3048572 |      |   |    | Europe | United Kingdom | Enteritidis | Enteritidis | 1425  | 6810 |
| SAL_EA8061AA | 1861   | SRR3048568 |      |   |    | Europe | United Kingdom | Enteritidis | Enteritidis | 1425  | 6806 |
| SAL_EA8068AA | 21831  | SRR3048560 |      |   |    | Europe | United Kingdom | Enteritidis | Enteritidis | 1425  | 6799 |
| SAL_EA8076AA | 18607  | SRR3048552 |      |   |    | Europe | United Kingdom | Enteritidis | Enteritidis | 1425  | 6791 |

|              |                      |                |      |    |        |                |               |                         |       |      |
|--------------|----------------------|----------------|------|----|--------|----------------|---------------|-------------------------|-------|------|
| SAL_EA8077AA | 29274                | SRR3048551     |      |    | Europe | United Kingdom | Enteritidis   | Enteritidis             | 1425  | 6790 |
| SAL_EA8091AA | 29969                | SRR3048535     |      |    | Europe | United Kingdom | Enteritidis   | Enteritidis             | 1425  | 6776 |
| SAL_EA8092AA | 1515                 | SRR3048534     |      |    | Europe | United Kingdom | Enteritidis   | Enteritidis             | 1425  | 6775 |
| SAL_EA8096AA | 15242                | SRR3048529     |      |    | Europe | United Kingdom | Enteritidis   | Enteritidis             | 3888  | 6771 |
| SAL_EA8103AA | 95034                | SRR3048521     |      |    | Europe | United Kingdom | Enteritidis   | Enteritidis             | 1425  | 6764 |
| SAL_EA8108AA | 43961                | SRR3048515     |      |    | Europe | United Kingdom | Enteritidis   | Enteritidis             | 3888  | 6759 |
| SAL_EA8110AA | 163178_S15           | SRR3047223     |      |    | Europe | United Kingdom | Enteritidis   | Enteritidis             | 1425  | 3680 |
| SAL_EA8112AA | 201405760            | traces-OjIMssi | 2014 | 7  | 23     | Europe         | France        | Enteritidis             | 3888  | 512  |
| SAL_EA8113AA | 201405756            | traces-OqWodHp | 2014 | 7  | 21     | Europe         | France        | Enteritidis             | 3888  | 554  |
| SAL_EA8159AA | WAPHL_SAL-A00933     | SRR3053228     | 2015 | 7  |        | North America  | United States | Enteritidis             | 1425  | 6712 |
| SAL_EA8160AA | WAPHL_SAL-A00930     | SRR3053227     | 2015 | 6  |        | North America  | United States | Enteritidis             | 1425  | 6711 |
| SAL_EA8161AA | WAPHL_SAL-A01150     | SRR3052034     | 2015 | 11 |        | North America  | United States | Enteritidis             | 1425  | 6710 |
| SAL_EA8162AA | WAPHL_SAL-A01149     | SRR3052033     | 2015 | 11 |        | North America  | United States | Enteritidis             | 1425  | 6709 |
| SAL_EA8163AA | WAPHL_SAL-A01148     | SRR3052032     | 2015 | 11 |        | North America  | United States | Enteritidis             | 1425  | 6709 |
| SAL_EA8164AA | WAPHL_SAL-A01147     | SRR3052031     | 2015 | 11 |        | North America  | United States | Enteritidis             | 26775 | 6708 |
| SAL_EA8173AA | CVM-N23779           | SRR3052022     | 2010 |    |        | North America  | United States | Albany                  | 1425  | 6699 |
| SAL_EA8203AA | WAPHL-SAL-A00985     | SRR3082383     | 2009 |    |        | North America  | United States | Enteritidis             | 1425  | 6670 |
| SAL_EA8245AA | CFSAN031777          | SRR3081649     | 2013 | 5  |        | Africa         | Ethiopia      | Typhimurium             | 7942  | 6642 |
| SAL_EA8416AA | 201405122            | traces-OwRGnIX | 2014 | 7  | 19     | Europe         | France        | Enteritidis             | 3888  | 553  |
| SAL_EA8417AA | 201405861            | traces-Ohvfaoj | 2014 | 7  | 18     | Europe         | France        | Enteritidis             | 3888  | 556  |
| SAL_EA8419AA | 201405757            | traces-Ofolqty | 2014 | 7  | 2      | Europe         | France        | Enteritidis             | 3888  | 555  |
| SAL_EA8492AA | VA-WGS-00657         | SRR3085566     | 2014 |    |        | North America  | United States | Enteritidis (Predicted) | 33238 | 6446 |
| SAL_EA8506AA | WAPHL_SAL-A01146     | SRR3086931     | 2015 | 11 |        | North America  | United States | Enteritidis             | 1425  | 6441 |
| SAL_EA8507AA | WAPHL_SAL-A01145     | SRR3086930     | 2015 | 10 |        | North America  | United States | Enteritidis             | 1425  | 6440 |
| SAL_EA8508AA | WAPHL_SAL-A01144     | SRR3086929     | 2015 | 10 |        | North America  | United States | Enteritidis             | 26775 | 6439 |
| SAL_EA8509AA | WAPHL_SAL-A01143     | SRR3086928     | 2015 | 10 |        | North America  | United States | Enteritidis             | 1425  | 6438 |
| SAL_EA8510AA | WAPHL_SAL-A01142     | SRR3086927     | 2015 | 9  |        | North America  | United States | Enteritidis             | 1425  | 6437 |
| SAL_EA8511AA | WAPHL_SAL-A01141     | SRR3086922     | 2015 | 9  |        | North America  | United States | Enteritidis             | 1425  | 6436 |
| SAL_EA8521AA | CFSAN031671          | SRR3088941     | 2005 | 9  |        | Africa         | Ethiopia      | Enteritidis (Predicted) | 3801  | 5947 |
| SAL_EA8522AA | CFSAN031686          | SRR3088940     | 2005 | 9  |        | Africa         | Ethiopia      | Enteritidis (Predicted) | 3801  | 5947 |
| SAL_EA8524AA | CFSAN031681          | SRR3088938     | 2005 | 9  |        | Africa         | Ethiopia      | Enteritidis (Predicted) | 3801  | 5947 |
| SAL_EA8526AA | CFSAN031668          | SRR3088933     | 2005 | 9  |        | Africa         | Ethiopia      | Enteritidis (Predicted) | 3801  | 5947 |
| SAL_EA8527AA | CFSAN031688          | SRR3088932     | 2005 | 9  |        | Africa         | Ethiopia      | Enteritidis (Predicted) | 3801  | 6430 |
| SAL_EA8528AA | CFSAN031683          | SRR3088931     | 2005 | 9  |        | Africa         | Ethiopia      | Enteritidis (Predicted) | 3801  | 5947 |
| SAL_EA8529AA | CFSAN031670          | SRR3088930     | 2005 | 9  |        | Africa         | Ethiopia      | Enteritidis (Predicted) | 3801  | 6429 |
| SAL_EA8532AA | CFSAN031680          | SRR3088927     | 2005 | 9  |        | Africa         | Ethiopia      | Enteritidis (Predicted) | 3801  | 5947 |
| SAL_EA8533AA | CFSAN031667          | SRR3088926     | 2005 | 9  |        | Africa         | Ethiopia      | Enteritidis (Predicted) | 3801  | 5947 |
| SAL_EA8534AA | CFSAN031687          | SRR3088925     | 2005 | 9  |        | Africa         | Ethiopia      | Enteritidis (Predicted) | 3801  | 6427 |
| SAL_EA8536AA | CFSAN031682          | SRR3088923     | 2005 | 9  |        | Africa         | Ethiopia      | Enteritidis (Predicted) | 3801  | 5947 |
| SAL_EA8537AA | CFSAN031684          | SRR3088922     | 2005 | 9  |        | Africa         | Ethiopia      | Enteritidis (Predicted) | 3801  | 6426 |
| SAL_EA8539AA | CFSAN031669          | SRR3088920     | 2005 | 9  |        | Africa         | Ethiopia      | Enteritidis (Predicted) | 3801  | 6424 |
| SAL_EA8540AA | CFSAN031679          | SRR3088919     | 2005 | 9  |        | Africa         | Ethiopia      | Enteritidis (Predicted) | 3801  | 5947 |
| SAL_EA8565AA | WAPHL-SAL-A00979     | SRR3089999     | 2009 |    |        | North America  | United States | Enteritidis             | 1425  | 6406 |
| SAL_EA8568AA | WAPHL-SAL-A00976     | SRR3089996     | 2009 |    |        | North America  | United States | Enteritidis             | 1425  | 6403 |
| SAL_EA8573AA | NY-N19971            | SRR3091415     | 2009 |    |        | North America  | United States | Enteritidis             | 1425  | 6398 |
| SAL_EA8575AA | NY-N19969            | SRR3091413     | 2009 |    |        | North America  | United States | Enteritidis             | 1425  | 6396 |
| SAL_EA8609AA | NY-N19890            | SRR3091347     | 2008 |    |        | North America  | United States | Enteritidis             | 1425  | 6362 |
| SAL_EA8642AA | FX_89_1              | traces-OkPIPIA | 1989 |    |        | Europe         | France        | Paratyphi C             | 1425  | 6338 |
| SAL_EA8655AA | NY-N19878            | SRR3091340     | 2008 |    |        | North America  | United States | Enteritidis             | 1425  | 6325 |
| SAL_EA8667AA | NY-N19876            | SRR3091328     | 2008 |    |        | North America  | United States | Enteritidis             | 1425  | 6313 |
| SAL_EA8725AA | NY-N19993            | SRR3096104     | 2009 |    |        | North America  | United States | Enteritidis             | 1425  | 6269 |
| SAL_EA8763AA | CDPHFDLB-F14M01163-1 | SRR3096070     | 2014 | 7  |        | North America  | United States | Enteritidis (Predicted) | 1425  | 6235 |
| SAL_EA8804AA | CDPHFDLB-F14M01163-2 | SRR3096061     | 2014 | 7  |        | North America  | United States | Enteritidis (Predicted) | 1425  | 6200 |
| SAL_EA8838AA | CVM-N23799           | SRR3099648     | 2010 |    |        | North America  | United States | Enteritidis             | 1425  | 6171 |
| SAL_EA8847AA | CVM-N23756           | SRR3099620     | 2010 |    |        | North America  | United States | Enteritidis             | 1425  | 6162 |
| SAL_EA8867AA | WAPHL-SAL-A01025     | SRR3101888     | 2009 |    |        | North America  | United States | Enteritidis             | 1425  | 6142 |
| SAL_EA8869AA | PNUSA5001388         | SRR3103842     |      |    |        | North America  | United States | Enteritidis (Predicted) | 1425  | 6140 |
| SAL_EA8870AA | PNUSA5001387         | SRR3103840     | 2015 | 12 |        | North America  | United States | Enteritidis             | 1425  | 6139 |
| SAL_EA8871AA | PNUSA5001386         | SRR3103839     | 2015 | 12 |        | North America  | United States | Enteritidis             | 1425  | 6138 |



|              |                     |                |      |    |               |                                  |                         |             |       |      |
|--------------|---------------------|----------------|------|----|---------------|----------------------------------|-------------------------|-------------|-------|------|
| SAL_EA8872AA | PNUSAS001385        | SRR3103838     | 2015 | 12 | North America | United States                    | Enteritidis             | Enteritidis | 1425  | 6138 |
| SAL_EA8873AA | PNUSAS001383        | SRR3103837     | 2015 | 12 | North America | United States                    | Enteritidis             | Enteritidis | 27901 | 6137 |
| SAL_EA8881AA | PNUSAS001374        | SRR3103829     | 2015 | 9  | North America | United States                    | Enteritidis             | Enteritidis | 1425  | 6129 |
| SAL_EA8883AA | PNUSAS001372        | SRR3103827     | 2015 | 10 | North America | United States                    | Enteritidis (Predicted) | Enteritidis | 1425  | 6127 |
| SAL_EA8893AA | LSS-6               | traces-OKwBNyr | 2015 |    | Europe        | United Kingdom                   | Enteritidis (Predicted) | Enteritidis | 1425  | 6117 |
| SAL_EA8896AA | LSS-9               | traces-OKkNPGs | 2015 |    | Europe        | United Kingdom                   | Enteritidis (Predicted) | Enteritidis | 1425  | 6114 |
| SAL_EA8942AA | BS_14759-sc-2322364 | ERR1216910     |      |    |               |                                  | Enteritidis (Predicted) | Enteritidis | 1425  | 6102 |
| SAL_EA8943AA | BS_06626-sc-2322341 | ERR1216909     |      |    |               |                                  | Enteritidis (Predicted) | Enteritidis | 1425  | 6101 |
| SAL_EA8962AA | E2015017856         | SRR3110501     | 2015 | 12 | North America | United States                    | Enteritidis             | Enteritidis | 1425  | 6089 |
| SAL_EA8963AA | E2015018531         | SRR3110500     | 2015 | 12 | North America | United States                    | Enteritidis             | Enteritidis | 1425  | 6088 |
| SAL_EA8964AA | E2016000176         | SRR3110499     | 2015 | 12 | North America | United States                    | Enteritidis             | Enteritidis | 1425  | 6087 |
| SAL_EA8965AA | E2016000204         | SRR3110498     | 2015 | 12 | North America | United States                    | Enteritidis             | Enteritidis | 1425  | 6086 |
| SAL_EA8966AA | E2016000215         | SRR3110497     | 2016 | 1  | North America | United States                    | Enteritidis             | Enteritidis | 1425  | 6085 |
| SAL_EA8994AA | WAPHL-SAL-A01040    | SRR3110468     | 2009 |    | North America | United States                    | Enteritidis             | Enteritidis | 1425  | 6057 |
| SAL_EA9002AA | CDPHFDLB-F14M01191d | SRR3110378     | 2014 | 7  | North America | United States                    | Enteritidis             | Enteritidis | 1425  | 6050 |
| SAL_EA9003AA | CDPHFDLB-F14M01191c | SRR3110377     | 2014 | 7  | North America | United States                    | Enteritidis             | Enteritidis | 1425  | 6049 |
| SAL_EA9025AA | FDA00009786         | SRR3114034     | 2000 | 3  | Asia          | Republic of the Union of Myanmar | Enteritidis (Predicted) | Enteritidis | 1425  | 6029 |
| SAL_EA9100AA | CFSAN031666         | SRR3116008     | 2005 | 9  | Africa        | Ethiopia                         | Enteritidis (Predicted) | Enteritidis | 3801  | 5959 |
| SAL_EA9102AA | CFSAN031663         | SRR3116006     | 2005 | 9  | Africa        | Ethiopia                         | Enteritidis (Predicted) | Enteritidis | 3801  | 5957 |
| SAL_EA9105AA | CFSAN031665         | SRR3116003     | 2005 | 9  | Africa        | Ethiopia                         | Enteritidis (Predicted) | Enteritidis | 3801  | 5954 |
| SAL_EA9109AA | CFSAN031662         | SRR3115998     | 2005 | 9  | Africa        | Ethiopia                         | Enteritidis (Predicted) | Enteritidis | 3801  | 5950 |
| SAL_EA9112AA | CFSAN031664         | SRR3115995     | 2005 | 9  | Africa        | Ethiopia                         | Enteritidis (Predicted) | Enteritidis | 3801  | 5947 |
| SAL_EA9121AA | CFSAN031736         | SRR3115985     | 2005 | 9  | Africa        | Ethiopia                         | Enteritidis (Predicted) | Enteritidis | 33152 | 5940 |
| SAL_EA9159AA | WAPHL-SAL-A01088    | SRR3116156     | 2009 |    | North America | United States                    | Enteritidis             | Enteritidis | 1425  | 5905 |
| SAL_EA9258AA | E2016000801         | SRR3131112     | 2016 | 1  | North America | United States                    | Enteritidis             | Enteritidis | 1425  | 5820 |
| SAL_EA9259AA | E2016000740         | SRR3131111     | 2016 | 1  | North America | United States                    | Enteritidis             | Enteritidis | 1425  | 5819 |
| SAL_EA9314AA | 38368               | SRR3120716     | 2014 | 7  | 31 Europe     | United Kingdom                   | Enteritidis             | Enteritidis | 3888  | 5791 |
| SAL_EA9317AA | 36461               | SRR3120711     |      |    | Europe        | United Kingdom                   | Enteritidis             | Enteritidis | 3888  | 5789 |
| SAL_EA9321AA | 43927               | SRR3120707     | 2014 | 8  | 17 Europe     | United Kingdom                   | Enteritidis             | Enteritidis | 3888  | 5788 |
| SAL_EA9323AA | 57093               | SRR3120669     |      |    | Europe        | United Kingdom                   | Enteritidis             | Enteritidis | 3900  | 5787 |
| SAL_EA9325AA | 36462               | SRR3120667     |      |    | Europe        | United Kingdom                   | Enteritidis             | Enteritidis | 1425  | 5786 |
| SAL_EA9355AA | FDA00000266         | SRR3137523     | 2002 | 6  | Asia          | Thailand                         | Enteritidis             | Enteritidis | 1425  | 5772 |
| SAL_EA9378AA | PNUSAS001392        | SRR3137222     | 2015 | 10 | North America | United States                    | Enteritidis             | Enteritidis | 1425  | 5752 |
| SAL_EA9400AA | 2016K-0030          | SRR3137166     |      |    | North America | United States                    | Enteritidis (Predicted) | Enteritidis | 1425  | 5730 |
| SAL_EA9420AA | PNUSAS001391        | SRR3137132     |      |    | North America | United States                    | Enteritidis (Predicted) | Enteritidis | 1425  | 5714 |
| SAL_EA9421AA | PNUSAS001390        | SRR3137129     |      |    | North America | United States                    | Enteritidis (Predicted) | Enteritidis | 1425  | 5713 |
| SAL_EA9424AA | PNUSAS001393        | SRR3137124     |      |    | North America | United States                    | Enteritidis (Predicted) | Enteritidis | 1425  | 5710 |
| SAL_EA9433AA | PNUSAS001478        | SRR3137085     |      |    | North America | United States                    | Enteritidis (Predicted) | Enteritidis | 1425  | 5701 |
| SAL_EA9434AA | PNUSAS001477        | SRR3137084     | 2015 | 12 | North America | United States                    | Enteritidis             | Enteritidis | 1425  | 5700 |
| SAL_EA9436AA | PNUSAS001475        | SRR3137081     | 2015 | 12 | North America | United States                    | Enteritidis             | Enteritidis | 1425  | 5698 |
| SAL_EA9437AA | PNUSAS001474        | SRR3137080     | 2015 | 11 | North America | United States                    | Enteritidis             | Enteritidis | 1425  | 5697 |
| SAL_EA9438AA | PNUSAS001473        | SRR3137079     | 2015 | 10 | North America | United States                    | Enteritidis             | Enteritidis | 1425  | 2067 |
| SAL_EA9473AA | E2016001421         | SRR3136814     | 2016 | 1  | North America | United States                    | Enteritidis (Predicted) | Enteritidis | 1425  | 1056 |
| SAL_EA9474AA | E2016001120         | SRR3136813     | 2016 | 1  | North America | United States                    | Enteritidis             | Enteritidis | 1425  | 613  |
| SAL_EA9475AA | E2016001099         | SRR3136812     | 2016 | 1  | North America | United States                    | Enteritidis             | Enteritidis | 1425  | 5664 |
| SAL_EA9476AA | E2016001071         | SRR3136811     | 2016 | 1  | North America | United States                    | Enteritidis             | Enteritidis | 1425  | 5663 |
| SAL_EA9477AA | E2016001029         | SRR3136810     | 2016 | 1  | North America | United States                    | Enteritidis             | Enteritidis | 1425  | 5662 |
| SAL_EA9491AA | E2015011581         | SRR3143631     | 2015 | 8  | North America | United States                    | Enteritidis             | Enteritidis | 27892 | 5650 |
| SAL_EA9528AA | CVM-N25383          | SRR3146666     | 2010 |    | North America | United States                    | Enteritidis             | Enteritidis | 1425  | 5615 |
| SAL_EA9535AA | CVM-N25372          | SRR3146659     | 2010 |    | North America | United States                    | Enteritidis             | Enteritidis | 1425  | 5608 |
| SAL_EA9536AA | CVM-N23854          | SRR3146658     | 2010 |    | North America | United States                    | Enteritidis             | Enteritidis | 1425  | 5607 |
| SAL_EA9537AA | CVM-N23852          | SRR3146657     | 2010 |    | North America | United States                    | Enteritidis             | Enteritidis | 1425  | 5606 |
| SAL_EA9591AA | PNUSAS001462        | SRR3147768     | 2015 | 12 | North America | United States                    | Enteritidis             | Enteritidis | 1425  | 5566 |
| SAL_EA9600AA | PNUSAS001458        | SRR3147759     | 2015 | 9  | North America | United States                    | Enteritidis             | Enteritidis | 1425  | 5557 |
| SAL_EA9705AA | CMCC50041           | GCF_001484025  |      |    | Europe        | Denmark                          | Enteritidis             | Enteritidis | 1425  | 5537 |
| SAL_EA9714AA | FORC_007            | GCF_001305235  | 2014 | 4  | Asia          | South Korea                      | Enteritidis (Predicted) | Enteritidis | 1425  | 5528 |
| SAL_EA9744AA | OLF-SE3-98983-4     | SRR1533455     | 2000 |    | North America | Canada                           | Enteritidis             | Enteritidis | 27446 | 5498 |
| SAL_EA9745AA | OLF-SE2-98984-6     | GCF_000750415  | 2000 |    | North America | Canada                           | Enteritidis             | Enteritidis | 27446 | 5497 |
| SAL_EA9751AA | OLF-SE6             | SRR1533592     | 2010 |    | North America | Canada                           | Enteritidis             | Enteritidis | 1425  | 5491 |

|              |                      |                |      |    |               |                |                                    |             |       |       |
|--------------|----------------------|----------------|------|----|---------------|----------------|------------------------------------|-------------|-------|-------|
| SAL_EA9752AA | OLF-SE1              | SRR1533150     | 2010 |    | North America | Canada         | Enteritidis                        | Enteritidis | 1425  | 5490  |
| SAL_EA9753AA | OLF-SE5              | GCF_000750455  | 2008 |    | North America | Canada         | Enteritidis                        | Enteritidis | 1425  | 5489  |
| SAL_EA9754AA | OLF-SE4              | SRR1533456     | 2009 |    | North America | Canada         | Enteritidis                        | Enteritidis | 1425  | 5488  |
| SAL_EA9755AA | OLF-SE11             | SRR1533835     | 2010 |    | North America | Canada         | Enteritidis                        | Enteritidis | 1425  | 5487  |
| SAL_EA9756AA | OLF-SE10             | GCF_000750335  | 2010 |    | North America | Canada         | Enteritidis                        | Enteritidis | 1425  | 5486  |
| SAL_EA9757AA | OLF-SE9              | SRR1533833     | 2009 |    | North America | Canada         | Enteritidis                        | Enteritidis | 49191 | 5485  |
| SAL_EA9758AA | OLF-SE8              | GCF_000750255  | 2010 |    | North America | Canada         | Enteritidis                        | Enteritidis | 1425  | 5484  |
| SAL_EA9759AA | OLF-SE7              | SRR1533624     | 2010 |    | North America | Canada         | Enteritidis                        | Enteritidis | 1425  | 5483  |
| SAL_EA9765AA | Durban               | GCF_000612325  | 2013 | 7  | Africa        | South Africa   | Enteritidis                        | Enteritidis | 3888  | 5477  |
| SAL_EA9783AA | P125109 / NCTC 13349 | GCF_000009505  |      |    |               |                | Enteritidis                        | Enteritidis | 1425  | 5459  |
| SAL_EA9786AA | E2016001566          | SRR3151856     | 2016 | 1  | North America | United States  | Enteritidis                        | Enteritidis | 1425  | 5456  |
| SAL_EA9787AA | E2016001533          | SRR3151855     | 2016 | 1  | North America | United States  | Enteritidis                        | Enteritidis | 1425  | 5455  |
| SAL_EA9788AA | E2016001504          | SRR3151854     | 2016 | 1  | North America | United States  | Enteritidis                        | Enteritidis | 1425  | 5454  |
| SAL_EA9789AA | E2016001477          | SRR3151853     | 2016 | 1  | North America | United States  | Enteritidis                        | Enteritidis | 1425  | 5453  |
| SAL_EA9790AA | E2016001474          | SRR3151852     | 2016 | 1  | North America | United States  | Enteritidis                        | Enteritidis | 27796 | 5452  |
| SAL_EA9792AA | CVM-N23714           | SRR3151802     | 2010 |    | North America | United States  | Typhimurium var. O5 - (Copenhagen) | Enteritidis | 1425  | 5450  |
| SAL_EA9900AA | FDA00000848          | SRR3170570     | 2005 | 6  | Asia          | China          | Enteritidis                        | Enteritidis | 1425  | 5389  |
| SAL_EA9908AA | 2015K-1300           | SRR3157769     | 2015 | 9  | North America | United States  | Enteritidis                        | Enteritidis | 1425  | 5380  |
| SAL_EA9909AA | 2015K-1299           | SRR3157768     |      |    | North America | United States  | Enteritidis (Predicted)            | Enteritidis | 1425  | 5381  |
| SAL_EA9910AA | 2015K-1298           | SRR3157767     | 2015 | 9  | North America | United States  | Enteritidis                        | Enteritidis | 1425  | 5380  |
| SAL_EA9911AA | 2015K-1297           | SRR3157766     | 2015 | 9  | North America | United States  | Enteritidis                        | Enteritidis | 1425  | 5380  |
| SAL_EA9974AA | 6282_96-sc-2416994   | ERR1251781     |      |    |               |                | Enteritidis (Predicted)            | Enteritidis | 1425  | 41131 |
| SAL_FA0045AA | 6148_1993-sc-2416919 | ERR1251710     |      |    |               |                | Enteritidis (Predicted)            | Enteritidis | 1425  | 41147 |
| SAL_FA0049AA | 3293_1993-sc-2416915 | ERR1251706     |      |    |               |                | Enteritidis (Predicted)            | Enteritidis | 1425  | 5259  |
| SAL_FA0053AA | 5351_1995-sc-2416911 | ERR1251702     |      |    |               |                | Enteritidis (Predicted)            | Enteritidis | 1425  | 41146 |
| SAL_FA0461AA | Enteritidis          | SRR3175437     | 2011 | 1  | North America | United States  | Enteritidis                        | Enteritidis | 1425  | 4904  |
| SAL_FA0463AA | S/20141173           | traces-OayzGfB | 2014 | 8  | 18 Europe     | United Kingdom | Enteritidis                        | Enteritidis | 3888  | 4902  |
| SAL_FA0472AA | S/20141063           | traces-OmLmkJS | 2014 | 7  | 25 Europe     | United Kingdom | Enteritidis                        | Enteritidis | 3888  | 4894  |
| SAL_FA0473AA | S/20151576           | traces-OKoldrg | 2015 | 11 | 2 Europe      | United Kingdom | Enteritidis                        | Enteritidis | 3888  | 4893  |
| SAL_FA0475AA | S/20151675           | traces-OWBnHwO | 2015 | 11 | 21 Europe     | United Kingdom | Enteritidis                        | Enteritidis | 3888  | 4892  |
| SAL_FA0476AA | S/20151717           | traces-OctTrOn | 2015 | 12 | 4 Europe      | United Kingdom | Enteritidis                        | Enteritidis | 3888  | 4891  |
| SAL_FA0477AA | S/20151730           | traces-OkYZTGl | 2015 | 12 | 8 Europe      | United Kingdom | Enteritidis                        | Enteritidis | 3888  | 4890  |
| SAL_FA0479AA | S/20151764           | traces-OfRkJLH | 2015 | 12 | 12 Europe     | United Kingdom | Enteritidis                        | Enteritidis | 3888  | 4889  |
| SAL_FA0480AA | S/20151765           | traces-OxQjxHw | 2015 | 12 | 18 Europe     | United Kingdom | Enteritidis                        | Enteritidis | 3888  | 4888  |
| SAL_FA0481AA | S/20151766           | traces-OmwJIEg | 2015 | 12 | 18 Europe     | United Kingdom | Enteritidis                        | Enteritidis | 3888  | 4887  |
| SAL_FA0482AA | S/20160045           | traces-OiyxVeZ | 2016 | 1  | 8 Europe      | United Kingdom | Enteritidis                        | Enteritidis | 3888  | 4886  |
| SAL_FA0483AA | S/20160073           | traces-OlyfCNS | 2016 | 1  | 8 Europe      | United Kingdom | Enteritidis                        | Enteritidis | 3888  | 4885  |
| SAL_FA0484AA | S/20160107           | traces-OTYvnWT | 2016 | 1  | 19 Europe     | United Kingdom | Enteritidis                        | Enteritidis | 3888  | 4884  |
| SAL_FA0485AA | S/20151457           | traces-OKzGWnR | 2015 | 10 | 12 Europe     | United Kingdom | Enteritidis                        | Enteritidis | 1425  | 4883  |
| SAL_FA0486AA | S/20151513           | traces-OyaeAvE | 2015 | 10 | 23 Europe     | United Kingdom | Enteritidis                        | Enteritidis | 1425  | 4882  |
| SAL_FA0535AA | FDA00009808          | SRR3173719     | 2016 |    | Asia          | Bangladesh     | Enteritidis (Predicted)            | Enteritidis | 1425  | 4836  |
| SAL_FA0606AA | PNUSA5001520         | SRR3171696     |      |    | North America | United States  | Enteritidis (Predicted)            | Enteritidis | 1425  | 4774  |
| SAL_FA0623AA | E2016001974          | SRR3173548     | 2016 | 2  | North America | United States  | Enteritidis                        | Enteritidis | 1425  | 4757  |
| SAL_FA0624AA | E2016001927          | SRR3173547     | 2016 | 2  | North America | United States  | Enteritidis                        | Enteritidis | 1425  | 4756  |
| SAL_FA0625AA | E2016001746          | SRR3173546     | 2016 | 1  | North America | United States  | Enteritidis                        | Enteritidis | 1425  | 3254  |
| SAL_FA0626AA | E2016001727          | SRR3173545     | 2016 | 1  | North America | United States  | Enteritidis                        | Enteritidis | 34197 | 4755  |
| SAL_FA0627AA | E2016001531          | SRR3173544     | 2016 | 1  | North America | United States  | Enteritidis                        | Enteritidis | 1425  | 3254  |
| SAL_FA0707AA | WAPHL-SAL-A01133     | SRR3182552     | 2009 |    | North America | United States  | Enteritidis                        | Enteritidis | 1425  | 4701  |
| SAL_FA0711AA | WAPHL-SAL-A01129     | SRR3182548     | 2009 |    | North America | United States  | Enteritidis                        | Enteritidis | 1425  | 4697  |
| SAL_FA0726AA | HIY0101              | SRR3182470     | 2010 | 7  | North America | United States  | Enteritidis                        | Enteritidis | 1425  | 4684  |
| SAL_FA0791AA | AK1131900079         | SRR3182265     | 2011 | 11 | North America | United States  | Enteritidis                        | Enteritidis | 1425  | 4627  |
| SAL_FA0792AA | AZ-TG79532           | SRR3182236     | 2015 |    | North America | United States  | Enteritidis (Predicted)            | Enteritidis | 1425  | 4625  |
| SAL_FA0793AA | AZ-TG79528           | SRR3182235     | 2015 |    | North America | United States  | Enteritidis (Predicted)            | Enteritidis | 1425  | 4626  |
| SAL_FA0794AA | AZ-TG79524           | SRR3182234     | 2015 |    | North America | United States  | Enteritidis (Predicted)            | Enteritidis | 1425  | 4625  |
| SAL_FA0802AA | FDA00009902          | SRR3182180     | 2016 | 2  | North America | United States  | Enteritidis (Predicted)            | Enteritidis | 1425  | 4618  |
| SAL_FA0803AA | FDA00009901          | SRR3182179     | 2016 | 2  | North America | United States  | Enteritidis (Predicted)            | Enteritidis | 1425  | 4617  |
| SAL_FA0830AA | 2016K-0074           | SRR3184400     | 2015 | 11 | North America | United States  | Enteritidis                        | Enteritidis | 1425  | 3680  |
| SAL_FA0831AA | 2016K-0075           | SRR3184399     | 2015 | 10 | North America | United States  | Enteritidis                        | Enteritidis | 1425  | 3680  |
| SAL_FA0832AA | 2016K-0076           | SRR3184398     | 2015 | 11 | North America | United States  | Enteritidis                        | Enteritidis | 1425  | 4600  |

|              |                  |                |      |    |               |                |                                    |             |       |      |
|--------------|------------------|----------------|------|----|---------------|----------------|------------------------------------|-------------|-------|------|
| SAL_FA0839AA | FSIS1605663      | SRR3184347     | 2016 |    | North America | United States  | Enteritidis                        | Enteritidis | 1425  | 4594 |
| SAL_FA0843AA | 2016K-0077       | SRR3184322     |      |    | North America | United States  | Enteritidis (Predicted)            | Enteritidis | 1425  | 4590 |
| SAL_FA0847AA | 2016K-0095       | SRR3184317     | 2015 | 10 | North America | United States  | Enteritidis                        | Enteritidis | 1425  | 4586 |
| SAL_FA0848AA | 2016K-0073       | SRR3184316     | 2015 | 10 | North America | United States  | Enteritidis                        | Enteritidis | 1425  | 3680 |
| SAL_FA0851AA | FSIS1605665      | SRR3184278     | 2016 |    | North America | United States  | Enteritidis                        | Enteritidis | 1425  | 4583 |
| SAL_FA0861AA | CVM-N26081       | SRR3184189     | 2010 |    | North America | United States  | Enteritidis                        | Enteritidis | 1425  | 4573 |
| SAL_FA0862AA | CVM-N26080       | SRR3184188     | 2010 |    | North America | United States  | Typhimurium var. O5 - (Copenhagen) | Enteritidis | 1425  | 4572 |
| SAL_FA0863AA | CVM-N26077       | SRR3184187     | 2010 |    | North America | United States  | Enteritidis                        | Enteritidis | 1425  | 4571 |
| SAL_FA0884AA | E2016002268      | SRR3184147     | 2016 | 2  | North America | United States  | Enteritidis                        | Enteritidis | 1425  | 3254 |
| SAL_FA0885AA | E2016002209      | SRR3184144     | 2016 | 2  | North America | United States  | Enteritidis                        | Enteritidis | 1425  | 4551 |
| SAL_FA1093AA | PNUSAS001519     | SRR3185195     | 2015 | 11 | North America | United States  | Enteritidis                        | Enteritidis | 1425  | 3680 |
| SAL_FA1094AA | PNUSAS001518     | SRR3185194     | 2015 | 10 | North America | United States  | Enteritidis                        | Enteritidis | 1425  | 3680 |
| SAL_FA1106AA | PNUSAS001577     | SRR3185114     | 2016 | 1  | North America | United States  | Enteritidis (Predicted)            | Enteritidis | 1425  | 4342 |
| SAL_FA1144AA | E2016002349      | SRR3188272     | 2016 | 2  | North America | United States  | Enteritidis                        | Enteritidis | 1425  | 4307 |
| SAL_FA1145AA | E2016002341      | SRR3188269     | 2016 | 2  | North America | United States  | Enteritidis                        | Enteritidis | 1425  | 4306 |
| SAL_FA1159AA | S/20151247       | traces-OjeACSe | 2015 | 9  | 4 Europe      | United Kingdom | Enteritidis                        | Enteritidis | 3888  | 4292 |
| SAL_FA1160AA | S/20151254       | traces-OMHnrau | 2015 | 9  | 7 Europe      | United Kingdom | Enteritidis                        | Enteritidis | 3888  | 3621 |
| SAL_FA1162AA | S/20151384       | traces-OVxhIKR | 2015 | 9  | 30 Europe     | United Kingdom | Enteritidis                        | Enteritidis | 3888  | 4290 |
| SAL_FA1163AA | S/20151412       | traces-OOQHYTI | 2015 | 10 | 7 Europe      | United Kingdom | Enteritidis                        | Enteritidis | 1425  | 1990 |
| SAL_FA1164AA | S/20151453       | traces-OkCuBXb | 2015 | 10 | 13 Europe     | United Kingdom | Enteritidis                        | Enteritidis | 1425  | 1990 |
| SAL_FA1165AA | S/20151518       | traces-OrviUXH | 2015 | 10 | 26 Europe     | United Kingdom | Enteritidis                        | Enteritidis | 3888  | 2037 |
| SAL_FA1166AA | S/20151709       | traces-OOrwHjf | 2015 | 12 | 3 Europe      | United Kingdom | Enteritidis                        | Enteritidis | 3888  | 3623 |
| SAL_FA1167AA | S/20151729       | traces-OorNCFv | 2015 | 12 | 9 Europe      | United Kingdom | Enteritidis                        | Enteritidis | 3888  | 2037 |
| SAL_FA1168AA | S/20160097       | traces-OKXoxkq | 2016 | 1  | 16 Europe     | United Kingdom | Enteritidis                        | Enteritidis | 3888  | 2002 |
| SAL_FA1172AA | ADRD-105825-10-4 | SRR3191589     | 2010 | 11 | North America | United States  | Enteritidis                        | Enteritidis | 1425  | 4286 |
| SAL_FA1269AA | CVM-N18564       | SRR3194572     | 2008 |    | North America | United States  | Enteritidis                        | Enteritidis | 1425  | 4196 |
| SAL_FA1270AA | CVM-N18563       | SRR3194571     | 2008 |    | North America | United States  | Enteritidis                        | Enteritidis | 1425  | 4195 |
| SAL_FA1277AA | CVM-N18566       | SRR3194564     | 2008 |    | North America | United States  | Enteritidis                        | Enteritidis | 1425  | 4188 |
| SAL_FA1279AA | AZ-TG79648       | SRR3194562     | 2015 |    | North America | United States  | Enteritidis (Predicted)            | Enteritidis | 26775 | 4186 |
| SAL_FA1280AA | AZ-TG79644       | SRR3194560     | 2015 |    | North America | United States  | Enteritidis (Predicted)            | Enteritidis | 26775 | 4185 |
| SAL_FA1287AA | AZ-TG79640       | SRR3198738     | 2015 |    | North America | United States  | Enteritidis (Predicted)            | Enteritidis | 1425  | 4178 |
| SAL_FA1288AA | AZ-TG79636       | SRR3198737     | 2015 |    | North America | United States  | Enteritidis (Predicted)            | Enteritidis | 1425  | 4177 |
| SAL_FA1289AA | AZ-TG79632       | SRR3198736     | 2015 |    | North America | United States  | Enteritidis (Predicted)            | Enteritidis | 1425  | 4176 |
| SAL_FA1294AA | AZ-TG79596       | SRR3198728     | 2015 |    | North America | United States  | Enteritidis (Predicted)            | Enteritidis | 1425  | 4174 |
| SAL_FA1298AA | AZ-TG79548       | SRR3198710     | 2015 |    | North America | United States  | Enteritidis (Predicted)            | Enteritidis | 1425  | 4169 |
| SAL_FA1299AA | AZ-TG79544       | SRR3198702     | 2015 |    | North America | United States  | Enteritidis (Predicted)            | Enteritidis | 1425  | 4169 |
| SAL_FA1300AA | AZ-TG79540       | SRR3198700     | 2015 |    | North America | United States  | Enteritidis (Predicted)            | Enteritidis | 1425  | 4169 |
| SAL_FA1301AA | AZ-TG79536       | SRR3198699     | 2015 |    | North America | United States  | Enteritidis (Predicted)            | Enteritidis | 1425  | 4169 |
| SAL_FA1302AA | AZ-TG92656       | SRR3198652     | 2016 | 1  | North America | United States  | Enteritidis                        | Enteritidis | 1425  | 4170 |
| SAL_FA1303AA | AZ-TG92652       | SRR3198651     | 2015 | 5  | North America | United States  | Enteritidis                        | Enteritidis | 1425  | 4169 |
| SAL_FA1304AA | AZ-TG92648       | SRR3198650     | 2015 | 4  | North America | United States  | Enteritidis                        | Enteritidis | 1425  | 4168 |
| SAL_FA1305AA | I2016002520      | SRR3198637     | 2016 | 2  | North America | United States  | Enteritidis                        | Enteritidis | 1425  | 4167 |
| SAL_FA1306AA | E2016002593      | SRR3217343     | 2016 | 2  | North America | United States  | Enteritidis                        | Enteritidis | 1425  | 4166 |
| SAL_FA1307AA | E2016002591      | SRR3198635     | 2016 | 2  | North America | United States  | Enteritidis                        | Enteritidis | 1425  | 166  |
| SAL_FA1308AA | E2016002583      | SRR3198634     | 2016 | 2  | North America | United States  | Enteritidis                        | Enteritidis | 1425  | 4165 |
| SAL_FA1309AA | E2016002547      | SRR3198633     | 2016 | 2  | North America | United States  | Enteritidis                        | Enteritidis | 34197 | 4164 |
| SAL_FA1322AA | FSIS1605765      | SRR3199700     | 2016 |    | North America | United States  | Enteritidis                        | Enteritidis | 1425  | 4151 |
| SAL_FA1376AA | H15042077201     | traces-OLZslJa |      |    | Europe        | United Kingdom | Enteritidis                        | Enteritidis | 3888  | 4110 |
| SAL_FA1377AA | H15372061101     | traces-OyqFzyW |      |    | Europe        | United Kingdom | Enteritidis                        | Enteritidis | 3888  | 2002 |
| SAL_FA1378AA | H15376029605     | traces-OvatOYX |      |    | Europe        | United Kingdom | Enteritidis                        | Enteritidis | 3888  | 2045 |
| SAL_FA1379AA | 1091200407       | traces-OWLuzPw |      |    | Europe        | Netherlands    | Enteritidis                        | Enteritidis | 3941  | 4109 |
| SAL_FA1380AA | 1091201969       | traces-OxgSgqt |      |    | Europe        | Netherlands    | Enteritidis                        | Enteritidis | 3888  | 4108 |
| SAL_FA1381AA | 1091301454       | traces-OKosqda |      |    | Europe        | Netherlands    | Enteritidis                        | Enteritidis | 3941  | 4107 |
| SAL_FA1382AA | 1091302865       | traces-OAxCFPK |      |    | Europe        | Netherlands    | Enteritidis                        | Enteritidis | 1425  | 4106 |
| SAL_FA1383AA | 1091401736       | traces-OlgLgxn |      |    | Europe        | Netherlands    | Enteritidis                        | Enteritidis | 3941  | 4105 |
| SAL_FA1384AA | 1091500827       | traces-OfffBu  |      |    | Europe        | Netherlands    | Enteritidis                        | Enteritidis | 3888  | 3621 |
| SAL_FA1385AA | 1091501188       | traces-OraYDbZ |      |    | Europe        | Netherlands    | Enteritidis                        | Enteritidis | 3888  | 3621 |
| SAL_FA1386AA | 1091500894       | traces-OELbjJn |      |    | Europe        | Netherlands    | Enteritidis                        | Enteritidis | 3888  | 3621 |
| SAL_FA1387AA | 1091501193       | traces-OxPcudp |      |    | Europe        | Netherlands    | Enteritidis                        | Enteritidis | 3888  | 3630 |

|              |                  |                |      |               |               |               |                         |       |      |
|--------------|------------------|----------------|------|---------------|---------------|---------------|-------------------------|-------|------|
| SAL_FA1388AA | 1091501248       | traces-OrpldUH |      | Europe        | Netherlands   | Enteritidis   | Enteritidis             | 3888  | 3630 |
| SAL_FA1389AA | 1091501424       | traces-0SbvFxt |      | Europe        | Netherlands   | Enteritidis   | Enteritidis             | 3888  | 4104 |
| SAL_FA1390AA | 1091501466       | traces-OniZWzC |      | Europe        | Netherlands   | Enteritidis   | Enteritidis             | 3888  | 3628 |
| SAL_FA1391AA | 1091501831       | traces-OjCTsIZ |      | Europe        | Netherlands   | Enteritidis   | Enteritidis             | 3888  | 4103 |
| SAL_FA1392AA | 1091501844       | traces-OjlpShs |      | Europe        | Netherlands   | Enteritidis   | Enteritidis             | 3888  | 3621 |
| SAL_FA1393AA | 1091501849       | traces-OWXuuTY |      | Europe        | Netherlands   | Enteritidis   | Enteritidis             | 3888  | 2002 |
| SAL_FA1394AA | 1091501884       | traces-0oVxuEz |      | Europe        | Netherlands   | Enteritidis   | Enteritidis             | 3888  | 4102 |
| SAL_FA1395AA | 1091501906       | traces-0wXjWkC |      | Europe        | Netherlands   | Enteritidis   | Enteritidis             | 3888  | 3621 |
| SAL_FA1396AA | 1091502012       | traces-OjPtsIz |      | Europe        | Netherlands   | Enteritidis   | Enteritidis             | 3888  | 4101 |
| SAL_FA1397AA | 1091502075       | traces-0cxExGv |      | Europe        | Netherlands   | Enteritidis   | Enteritidis             | 3888  | 4101 |
| SAL_FA1398AA | 1091502499       | traces-0wyGyZf |      | Europe        | Netherlands   | Enteritidis   | Enteritidis             | 3888  | 4100 |
| SAL_FA1399AA | 114213           | traces-0vLQyfx |      | Europe        | Finland       | Enteritidis   | Enteritidis             | 3888  | 2002 |
| SAL_FA1411AA | FSIS1605964      | SRR3204218     | 2016 | North America | United States | Enteritidis   | Enteritidis             | 1425  | 4088 |
| SAL_FA1412AA | FSIS1605965      | SRR3204217     | 2016 | North America | United States | Enteritidis   | Enteritidis             | 1425  | 4089 |
| SAL_FA1413AA | FSIS1605963      | SRR3204216     | 2016 | North America | United States | Enteritidis   | Enteritidis             | 1425  | 4088 |
| SAL_FA1414AA | FSIS1605961      | SRR3204215     | 2016 | North America | United States | Enteritidis   | Enteritidis             | 1425  | 4084 |
| SAL_FA1415AA | FSIS1605960      | SRR3204214     | 2016 | North America | United States | Enteritidis   | Enteritidis             | 1425  | 4084 |
| SAL_FA1416AA | FSIS1605966      | SRR3204212     | 2016 | North America | United States | Enteritidis   | Enteritidis             | 1425  | 4087 |
| SAL_FA1417AA | FSIS1605962      | SRR3204211     | 2016 | North America | United States | Enteritidis   | Enteritidis             | 1425  | 4084 |
| SAL_FA1418AA | FSIS1605956      | SRR3204210     | 2016 | North America | United States | Enteritidis   | Enteritidis             | 1425  | 4086 |
| SAL_FA1419AA | FSIS1605954      | SRR3204209     | 2016 | North America | United States | Enteritidis   | Enteritidis             | 1425  | 915  |
| SAL_FA1420AA | FSIS1605953      | SRR3204208     | 2016 | North America | United States | Enteritidis   | Enteritidis             | 1425  | 915  |
| SAL_FA1421AA | FSIS1605952      | SRR3204207     | 2016 | North America | United States | Enteritidis   | Enteritidis             | 1425  | 4085 |
| SAL_FA1422AA | FSIS1605958      | SRR3204206     | 2016 | North America | United States | Enteritidis   | Enteritidis             | 1425  | 4084 |
| SAL_FA1423AA | FSIS1605959      | SRR3204026     | 2016 | North America | United States | Enteritidis   | Enteritidis             | 1425  | 4084 |
| SAL_FA1424AA | FSIS1605955      | SRR3204025     | 2016 | North America | United States | Enteritidis   | Enteritidis             | 1425  | 915  |
| SAL_FA1425AA | FSIS1605957      | SRR3204023     | 2016 | North America | United States | Enteritidis   | Enteritidis             | 1425  | 4083 |
| SAL_FA1426AA | FDA00004015      | SRR3205955     | 2012 | 4             | North America | United States | Enteritidis             | 26543 | 4082 |
| SAL_FA1427AA | FDA00004016      | SRR3205954     | 2012 | 5             | Asia          | Pakistan      | Enteritidis             | 1425  | 4081 |
| SAL_FA1428AA | FDA00004017      | SRR3205953     | 2012 | 5             | Asia          | Pakistan      | Enteritidis             | 1425  | 4080 |
| SAL_FA1469AA | PNUSAS001644     | SRR3205703     | 2016 | 2             | North America | United States | Enteritidis             | 1425  | 1201 |
| SAL_FA1470AA | PNUSAS001643     | SRR3205702     | 2016 | 2             | North America | United States | Enteritidis             | 1425  | 1201 |
| SAL_FA1471AA | PNUSAS001642     | SRR3205701     |      |               | North America | United States | Enteritidis (Predicted) | 1425  | 1201 |
| SAL_FA1480AA | PNUSAS001517     | SRR3205692     | 2015 | 12            | North America | United States | Enteritidis             | 1425  | 4034 |
| SAL_FA1482AA | Enteritidis      | SRR3205690     | 2011 | 1             | North America | United States | Enteritidis             | 1425  | 4032 |
| SAL_FA1489AA | Enteritidis      | SRR3205683     | 2010 | 7             | North America | United States | Enteritidis (Predicted) | 1425  | 4025 |
| SAL_FA1496AA | PNUSAS001516     | SRR3205676     |      |               | North America | United States | Enteritidis (Predicted) | 1425  | 4019 |
| SAL_FA1497AA | PNUSAS001515     | SRR3205675     |      |               | North America | United States | Enteritidis (Predicted) | 1425  | 4018 |
| SAL_FA1498AA | PNUSAS001514     | SRR3205674     |      |               | North America | United States | Enteritidis (Predicted) | 1425  | 4017 |
| SAL_FA1499AA | NY62259358       | SRR3206638     | 2016 | 2             | North America | United States | Enteritidis             | 1425  | 4016 |
| SAL_FA1500AA | NY62259321       | SRR3206637     | 2016 | 2             | North America | United States | Enteritidis             | 1425  | 4015 |
| SAL_FA1501AA | NY62259097       | SRR3206636     | 2016 | 1             | North America | United States | Enteritidis             | 1425  | 4014 |
| SAL_FA1506AA | NY-N20133        | SRR3210664     | 2009 |               | North America | United States | Enteritidis             | 1425  | 4011 |
| SAL_FA1515AA | NY-N20124        | SRR3210550     | 2009 |               | North America | United States | Enteritidis             | 1425  | 4004 |
| SAL_FA1518AA | NY-N20121        | SRR3210652     | 2009 |               | North America | United States | Enteritidis             | 1425  | 4001 |
| SAL_FA1520AA | NY-N20119        | SRR3210650     | 2009 |               | North America | United States | Enteritidis             | 1425  | 3999 |
| SAL_FA1537AA | WAPHL_SAL-A00846 | SRR3210452     | 2006 |               | North America | United States | Enteritidis             | 1425  | 3994 |
| SAL_FA1609AA | E2016002697      | SRR3214118     | 2016 | 2             | North America | United States | Enteritidis             | 1425  | 3929 |
| SAL_FA1610AA | E2016002658      | SRR3214106     | 2016 | 2             | North America | United States | Enteritidis             | 1425  | 3254 |
| SAL_FA1633AA | FSIS1605968      | SRR3209764     | 2015 |               | North America | United States | Enteritidis             | 1425  | 3911 |
| SAL_FA1678AA | PNUSAS001721     | SRR3216568     |      |               | North America | United States | Enteritidis (Predicted) | 1425  | 3871 |
| SAL_FA1679AA | PNUSAS001720     | SRR3216567     |      |               | North America | United States | Enteritidis (Predicted) | 1425  | 3870 |
| SAL_FA1689AA | 2016K-0114       | SRR3216127     | 2015 | 12            | North America | United States | Enteritidis             | 1425  | 3680 |
| SAL_FA1737AA | HIY0325          | SRR3214193     | 2011 | 1             | North America | United States | Enteritidis             | 1425  | 3820 |
| SAL_FA1741AA | HIY0313          | SRR3214156     | 2011 | 1             | North America | United States | Enteritidis             | 1425  | 3816 |
| SAL_FA1746AA | HIY0332          | SRR3215265     | 2011 | 1             | North America | United States | Enteritidis             | 1425  | 3813 |
| SAL_FA1750AA | CFSAN047179      | SRR3215232     | 2016 | 2             | North America | United States | Enteritidis             | 1425  | 3811 |
| SAL_FA1751AA | CFSAN047178      | SRR3215231     | 2016 | 2             | North America | United States | Enteritidis             | 1425  | 3810 |
| SAL_FA1752AA | CFSAN047176      | SRR3215229     | 2016 | 2             | North America | United States | Enteritidis             | 1425  | 3809 |

|              |              |                |      |    |               |                |                  |             |      |      |
|--------------|--------------|----------------|------|----|---------------|----------------|------------------|-------------|------|------|
| SAL_FA1753AA | CFSAN047177  | SRR3215230     | 2016 | 2  | North America | United States  | Enteritidis      | Enteritidis | 1425 | 3808 |
| SAL_FA1754AA | CFSAN047175  | SRR3215228     | 2016 | 2  | North America | United States  | Enteritidis      | Enteritidis | 1425 | 3807 |
| SAL_FA1865AA | H14252044805 | traces-OwYwXTP |      |    | Europe        | United Kingdom | Enteritidis      | Enteritidis | 3888 | 3718 |
| SAL_FA1893AA | FSIS1605818  | SRR3225818     | 2016 |    | North America | United States  | Enteritidis      | Enteritidis | 1425 | 3690 |
| SAL_FA1904AA | 2016K-0113   | SRR3231366     | 2015 | 10 | North America | United States  | Serotype Pending | Enteritidis | 1425 | 3680 |
| SAL_FA1952AA | H14306020905 | traces-OXQLSgo |      |    | Europe        | United Kingdom | Enteritidis      | Enteritidis | 3888 | 3643 |
| SAL_FA1953AA | H14312043801 | traces-OJLoago |      |    | Europe        | United Kingdom | Enteritidis      | Enteritidis | 3888 | 3643 |
| SAL_FA1954AA | H14316038101 | traces-OmrszXs |      |    | Europe        | United Kingdom | Enteritidis      | Enteritidis | 3888 | 3643 |
| SAL_FA1955AA | H14352045501 | traces-OengMQs |      |    | Europe        | United Kingdom | Enteritidis      | Enteritidis | 3888 | 3621 |
| SAL_FA1956AA | H14354090001 | traces-OnQgIAU |      |    | Europe        | United Kingdom | Enteritidis      | Enteritidis | 3888 | 3642 |
| SAL_FA1957AA | H14422064201 | traces-OouGCEz |      |    | Europe        | United Kingdom | Enteritidis      | Enteritidis | 3888 | 3621 |
| SAL_FA1958AA | H14444076001 | traces-OlyFchD |      |    |               |                | Enteritidis      | Enteritidis | 3888 | 3641 |
| SAL_FA1959AA | H14386066501 | traces-OzHptll |      |    |               |                | Enteritidis      | Enteritidis | 3888 | 3640 |
| SAL_FA1960AA | H14422065001 | traces-ORHhKNf |      |    |               |                | Enteritidis      | Enteritidis | 3888 | 3639 |
| SAL_FA1961AA | H14470042801 | traces-OicwGHR |      |    | Europe        | United Kingdom | Enteritidis      | Enteritidis | 3888 | 3621 |
| SAL_FA1962AA | H14494056401 | traces-OuLPhU  |      |    | Europe        | United Kingdom | Enteritidis      | Enteritidis | 3888 | 3630 |
| SAL_FA1963AA | H15032069901 | traces-OlhemcD |      |    | Europe        | United Kingdom | Enteritidis      | Enteritidis | 3888 | 3638 |
| SAL_FA1964AA | H15032070001 | traces-OydCprd |      |    | Europe        | United Kingdom | Enteritidis      | Enteritidis | 3888 | 3637 |
| SAL_FA1965AA | H15032070101 | traces-OtlKLxl |      |    |               |                | Enteritidis      | Enteritidis | 3888 | 3635 |
| SAL_FA1966AA | H15042077601 | traces-OedoGZB |      |    | Europe        | United Kingdom | Enteritidis      | Enteritidis | 3888 | 3636 |
| SAL_FA1967AA | H15044067501 | traces-OCXaLzc |      |    |               |                | Enteritidis      | Enteritidis | 3888 | 3635 |
| SAL_FA1968AA | H15192051601 | traces-OeGyllR |      |    | Europe        | United Kingdom | Enteritidis      | Enteritidis | 3888 | 3634 |
| SAL_FA1969AA | H15224048305 | traces-ORhRwHc |      |    | Europe        | United Kingdom | Enteritidis      | Enteritidis | 3888 | 3633 |
| SAL_FA1970AA | H15308062501 | traces-OjaEFvw |      |    | Europe        | United Kingdom | Enteritidis      | Enteritidis | 3888 | 3628 |
| SAL_FA1971AA | H15312063501 | traces-OiBerUR |      |    | Europe        | United Kingdom | Enteritidis      | Enteritidis | 3888 | 3632 |
| SAL_FA1972AA | H15322048701 | traces-OsVADYb |      |    | Europe        | United Kingdom | Enteritidis      | Enteritidis | 3888 | 3631 |
| SAL_FA1973AA | H15328043601 | traces-OxaRlFT |      |    | Europe        | United Kingdom | Enteritidis      | Enteritidis | 3888 | 3630 |
| SAL_FA1974AA | H15328043701 | traces-QQBgkFW |      |    |               |                | Enteritidis      | Enteritidis | 3888 | 3629 |
| SAL_FA1975AA | H15320043005 | traces-OlzWBIO |      |    | Europe        | United Kingdom | Enteritidis      | Enteritidis | 3888 | 3628 |
| SAL_FA1976AA | H15356015101 | traces-OLCdwLj |      |    | Europe        | United Kingdom | Enteritidis      | Enteritidis | 3888 | 2002 |
| SAL_FA1977AA | H15370048401 | traces-OmVriFT |      |    | Europe        | United Kingdom | Enteritidis      | Enteritidis | 3888 | 2002 |
| SAL_FA1978AA | H15374051701 | traces-OWcmDVt |      |    | Europe        | United Kingdom | Enteritidis      | Enteritidis | 3888 | 3627 |
| SAL_FA1979AA | H15374051801 | traces-OjRwWtw |      |    | Europe        | United Kingdom | Enteritidis      | Enteritidis | 3888 | 2002 |
| SAL_FA1980AA | H15388050601 | traces-OCaNDVn |      |    | Europe        | United Kingdom | Enteritidis      | Enteritidis | 3888 | 2002 |
| SAL_FA1981AA | H15392042801 | traces-OeCtmym |      |    | Europe        | United Kingdom | Enteritidis      | Enteritidis | 3888 | 2002 |
| SAL_FA1982AA | H15412042801 | traces-OjuHwNf |      |    | Europe        | United Kingdom | Enteritidis      | Enteritidis | 3888 | 2037 |
| SAL_FA1983AA | H15418062005 | traces-OxWCqYJ |      |    | Europe        | United Kingdom | Enteritidis      | Enteritidis | 3888 | 2179 |
| SAL_FA1984AA | H15422079405 | traces-OllyDU  |      |    | Europe        | United Kingdom | Enteritidis      | Enteritidis | 3888 | 2002 |
| SAL_FA1985AA | H15470034701 | traces-OSkXQVp |      |    | Europe        | United Kingdom | Enteritidis      | Enteritidis | 3888 | 3626 |
| SAL_FA1986AA | H15472054001 | traces-OWFNDzJ |      |    | Europe        | United Kingdom | Enteritidis      | Enteritidis | 3888 | 2002 |
| SAL_FA1987AA | H15484056501 | traces-OXEsWLg |      |    |               |                | Enteritidis      | Enteritidis | 3888 | 3625 |
| SAL_FA1988AA | H15488060801 | traces-OqhIAVh |      |    | Europe        | United Kingdom | Enteritidis      | Enteritidis | 3888 | 2037 |
| SAL_FA1989AA | H15496055001 | traces-OcnPqrm |      |    | Europe        | United Kingdom | Enteritidis      | Enteritidis | 3888 | 3621 |
| SAL_FA1990AA | H15508030801 | traces-OMDEInR |      |    | Europe        | United Kingdom | Enteritidis      | Enteritidis | 3888 | 3621 |
| SAL_FA1991AA | H15510049001 | traces-OFoiTnF |      |    | Europe        | United Kingdom | Enteritidis      | Enteritidis | 3888 | 3624 |
| SAL_FA1992AA | H15512050601 | traces-OkwvbjO |      |    | Europe        | United Kingdom | Enteritidis      | Enteritidis | 3888 | 3623 |
| SAL_FA1993AA | H15518052901 | traces-OzLVTBl |      |    | Europe        | United Kingdom | Enteritidis      | Enteritidis | 3888 | 3621 |
| SAL_FA1994AA | H15534109101 | traces-OpXhbCy |      |    | Europe        | United Kingdom | Enteritidis      | Enteritidis | 3888 | 3622 |
| SAL_FA1995AA | H16022067101 | traces-OeHzSBo |      |    | Europe        | United Kingdom | Enteritidis      | Enteritidis | 3888 | 3621 |
| SAL_FA1996AA | H16022067901 | traces-OYPYcKH |      |    | Europe        | United Kingdom | Enteritidis      | Enteritidis | 3888 | 3621 |
| SAL_FA1997AA | H16022068001 | traces-OrUQvKK |      |    | Europe        | United Kingdom | Enteritidis      | Enteritidis | 3888 | 2002 |
| SAL_FA1998AA | H16022068101 | traces-OnmuYpa |      |    | Europe        | United Kingdom | Enteritidis      | Enteritidis | 3888 | 3621 |
| SAL_FA1999AA | H16022068201 | traces-OkplDPe |      |    | Europe        | United Kingdom | Enteritidis      | Enteritidis | 3888 | 2002 |
| SAL_FA2107AA | 1091204377   | traces-OwpLPmN | 2012 | 11 | 15 Europe     | Netherlands    | Enteritidis      | Enteritidis | 1425 | 3524 |
| SAL_FA2108AA | 1091300815   | traces-OWpldBj | 2013 | 4  | 11 Europe     | Netherlands    | Enteritidis      | Enteritidis | 1425 | 3523 |
| SAL_FA2109AA | 1091300816   | traces-OgRShgM | 2013 | 4  | 11 Europe     | Netherlands    | Enteritidis      | Enteritidis | 1425 | 3522 |
| SAL_FA2110AA | 1091302548   | traces-Oniaqui | 2013 | 11 | 14 Europe     | Netherlands    | Enteritidis      | Enteritidis | 3888 | 3521 |
| SAL_FA2111AA | 1091302549   | traces-OphPOTj | 2013 | 11 | 14 Europe     | Netherlands    | Enteritidis      | Enteritidis | 3888 | 3520 |
| SAL_FA2112AA | 1091302550   | traces-OzcQHWQ | 2013 | 11 | 14 Europe     | Netherlands    | Enteritidis      | Enteritidis | 3888 | 3519 |

|              |              |                |      |    |    |               |                |                         |             |       |      |
|--------------|--------------|----------------|------|----|----|---------------|----------------|-------------------------|-------------|-------|------|
| SAL_FA2113AA | 1091302777   | traces-OSIKCAU | 2013 | 12 | 12 | Europe        | Netherlands    | Enteritidis             | Enteritidis | 3888  | 3518 |
| SAL_FA2114AA | 1091302778   | traces-OghzaUi | 2013 | 12 | 12 | Europe        | Netherlands    | Enteritidis             | Enteritidis | 3888  | 3517 |
| SAL_FA2115AA | 1091502338   | traces-OJuluFd | 2015 | 11 | 30 | Europe        | Netherlands    | Enteritidis             | Enteritidis | 3888  | 3516 |
| SAL_FA2184AA | PNUSAS001719 | SRR3240353     |      |    |    | North America | United States  | Enteritidis (Predicted) | Enteritidis | 1425  | 3461 |
| SAL_FA2185AA | PNUSAS001718 | SRR3240352     |      |    |    | North America | United States  | Enteritidis (Predicted) | Enteritidis | 1425  | 1201 |
| SAL_FA2186AA | PHUSAS001717 | SRR3240351     |      |    |    | North America | United States  | Enteritidis (Predicted) | Enteritidis | 1425  | 3460 |
| SAL_FA2187AA | PNUSAS001716 | SRR3240350     |      |    |    | North America | United States  | Enteritidis (Predicted) | Enteritidis | 1425  | 3459 |
| SAL_FA2188AA | PNUSAS001715 | SRR3240349     |      |    |    | North America | United States  | Enteritidis (Predicted) | Enteritidis | 1425  | 1201 |
| SAL_FA2204AA | FSIS1605967  | SRR3241322     | 2015 |    |    | North America | United States  | Enteritidis             | Enteritidis | 1425  | 3445 |
| SAL_FA2239AA | CVM-N19747   | SRR3242211     | 2008 |    |    | North America | United States  | Enteritidis             | Enteritidis | 1425  | 3417 |
| SAL_FA2254AA | I2016002162  | SRR3242191     | 2016 | 2  |    | North America | United States  | Enteritidis             | Enteritidis | 1425  | 3404 |
| SAL_FA2307AA | FDA00003975  | SRR3271929     | 2012 | 1  |    | North America | United States  | Enteritidis             | Enteritidis | 1425  | 3360 |
| SAL_FA2308AA | FDA00003976  | SRR3271928     | 2012 | 1  |    | North America | United States  | Enteritidis             | Enteritidis | 1425  | 3359 |
| SAL_FA2309AA | FDA00003977  | SRR3271927     | 2012 | 1  |    | North America | United States  | Enteritidis             | Enteritidis | 1425  | 3358 |
| SAL_FA2332AA | CVM-N23570   | SRR3271882     | 2009 |    |    | North America | United States  | I 9,12:Nonmotile        | Enteritidis | 1425  | 3337 |
| SAL_FA2335AA | I2016003617  | SRR3271880     | 2016 | 3  |    | North America | United States  | Enteritidis             | Enteritidis | 1425  | 3334 |
| SAL_FA2336AA | E2016003746  | SRR3271879     | 2016 | 3  |    | North America | United States  | Enteritidis             | Enteritidis | 1425  | 3333 |
| SAL_FA2337AA | E2016003743  | SRR3271878     | 2016 | 3  |    | North America | United States  | Enteritidis             | Enteritidis | 1425  | 3332 |
| SAL_FA2338AA | E2016003725  | SRR3271877     | 2016 | 3  |    | North America | United States  | Enteritidis             | Enteritidis | 1425  | 3331 |
| SAL_FA2339AA | E2016003724  | SRR3271876     | 2016 | 3  |    | North America | United States  | Enteritidis             | Enteritidis | 1425  | 3330 |
| SAL_FA2426AA | PNUSAS001736 | SRR3277290     |      |    |    | North America | United States  | Enteritidis (Predicted) | Enteritidis | 1425  | 3254 |
| SAL_FA2451AA | S/20151604   | traces-OnnRFex | 2015 | 11 | 4  | Europe        | United Kingdom | Enteritidis             | Enteritidis | 3888  | 3230 |
| SAL_FA2452AA | S/20160151   | traces-OLVsVXF | 2016 | 2  | 3  | Europe        | United Kingdom | Enteritidis             | Enteritidis | 3888  | 3229 |
| SAL_FA2453AA | S/20160163   | traces-ODYCXIJ | 2016 | 2  | 10 | Europe        | United Kingdom | Enteritidis             | Enteritidis | 3888  | 3228 |
| SAL_FA2454AA | S/20160169   | traces-OshDhps | 2016 | 2  | 17 | Europe        | United Kingdom | Enteritidis             | Enteritidis | 3888  | 3227 |
| SAL_FA2467AA | CFSAN047858  | SRR3286887     | 2016 | 3  |    | North America | United States  | Enteritidis (Predicted) | Enteritidis | 1425  | 3214 |
| SAL_FA2468AA | CFSAN047857  | SRR3286885     | 2016 | 3  |    | North America | United States  | Enteritidis (Predicted) | Enteritidis | 1425  | 3213 |
| SAL_FA2534AA | PNUSAS001765 | SRR3289848     |      |    |    | North America | United States  | Enteritidis (Predicted) | Enteritidis | 26775 | 3141 |
| SAL_FA2539AA | PNUSAS001761 | SRR3289843     | 2016 | 2  |    | North America | United States  | Enteritidis             | Enteritidis | 1425  | 3136 |
| SAL_FA2543AA | PNUSAS001759 | SRR3289839     | 2016 | 1  |    | North America | United States  | Enteritidis             | Enteritidis | 1425  | 3132 |
| SAL_FA2562AA | CVM-N19825   | SRR3289793     | 2008 |    |    | North America | United States  | Enteritidis             | Enteritidis | 1425  | 3173 |
| SAL_FA2566AA | CVM-N19818   | SRR3289778     | 2008 |    |    | North America | United States  | Enteritidis             | Enteritidis | 1425  | 3169 |
| SAL_FA2570AA | CVM-N19813   | SRR3289768     | 2008 |    |    | North America | United States  | Enteritidis             | Enteritidis | 1425  | 3168 |
| SAL_FA2584AA | PNUSAS001784 | SRR3290704     | 2016 | 2  |    | North America | United States  | Enteritidis             | Enteritidis | 1425  | 3106 |
| SAL_FA2637AA | CVM-N26930   | SRR3312093     | 2010 |    |    | North America | United States  | Enteritidis             | Enteritidis | 1425  | 3066 |
| SAL_FA2648AA | CVM-N26918   | SRR3312088     | 2010 |    |    | North America | United States  | Enteritidis             | Enteritidis | 1425  | 3057 |
| SAL_FA2650AA | CVM-N26664   | SRR3294526     | 2010 |    |    | North America | United States  | Enteritidis             | Enteritidis | 1425  | 3055 |
| SAL_FA3015AA | CVM N58014   | SRR3295598     | 2015 |    |    | North America | United States  | Enteritidis             | Enteritidis | 1425  | 2708 |
| SAL_FA3018AA | CVM N58010   | SRR3295595     | 2015 |    |    | North America | United States  | Enteritidis             | Enteritidis | 1425  | 2705 |
| SAL_FA3036AA | CVM N57992   | SRR3295577     | 2015 |    |    | North America | United States  | Enteritidis             | Enteritidis | 1425  | 2690 |
| SAL_FA3043AA | CVM N57985   | SRR3295570     | 2015 |    |    | North America | United States  | Enteritidis             | Enteritidis | 27901 | 2680 |
| SAL_FA3047AA | CVM N57981   | SRR3295566     | 2015 |    |    | North America | United States  | Enteritidis             | Enteritidis | 27901 | 2680 |
| SAL_FA3048AA | CVM N57980   | SRR3295565     | 2015 |    |    | North America | United States  | Enteritidis             | Enteritidis | 27901 | 2679 |
| SAL_FA3059AA | CVM N56570   | SRR3295554     | 2015 |    |    | North America | United States  | Enteritidis             | Enteritidis | 1425  | 2668 |
| SAL_FA3080AA | CVM N56251   | SRR3295533     | 2015 |    |    | North America | United States  | Enteritidis             | Enteritidis | 1425  | 2649 |
| SAL_FA3098AA | CVM N55862   | SRR3295515     | 2015 |    |    | North America | United States  | Enteritidis             | Enteritidis | 1425  | 2632 |
| SAL_FA3099AA | CVM N55861   | SRR3295514     | 2015 |    |    | North America | United States  | Enteritidis             | Enteritidis | 1425  | 2631 |
| SAL_FA3102AA | CVM N55856   | SRR3295511     | 2015 |    |    | North America | United States  | Enteritidis             | Enteritidis | 1425  | 2628 |
| SAL_FA3105AA | CVM N55853   | SRR3295508     | 2015 |    |    | North America | United States  | Enteritidis             | Enteritidis | 1425  | 2625 |
| SAL_FA3107AA | CVM N55851   | SRR3295506     | 2015 |    |    | North America | United States  | Enteritidis             | Enteritidis | 1425  | 2623 |
| SAL_FA3292AA | E2016004270  | SRR3306270     | 2016 | 3  |    | North America | United States  | Enteritidis             | Enteritidis | 1425  | 650  |
| SAL_FA3294AA | E2016003967  | SRR3306268     | 2016 | 3  |    | North America | United States  | Enteritidis             | Enteritidis | 1425  | 2520 |
| SAL_FA3300AA | CVM-N23556   | SRR3306213     | 2009 |    |    | North America | United States  | Enteritidis             | Enteritidis | 1425  | 2514 |
| SAL_FA3303AA | CVM-N23568   | SRR3306209     | 2009 |    |    | North America | United States  | I 9,12:Nonmotile        | Enteritidis | 1425  | 2511 |
| SAL_FA3347AA | 161082       | SRR3312605     | 2015 | 9  |    | Europe        | United Kingdom | Enteritidis             | Enteritidis | 1425  | 1268 |
| SAL_FA3348AA | 161084       | SRR3312604     | 2015 | 9  |    | Europe        | United Kingdom | Enteritidis             | Enteritidis | 1425  | 2459 |
| SAL_FA3349AA | 153196       | SRR3312597     | 2015 | 8  |    | Europe        | United Kingdom | Enteritidis             | Enteritidis | 1425  | 2480 |
| SAL_FA3350AA | 159004       | SRR3312591     | 2015 | 9  |    | Europe        | United Kingdom | Enteritidis             | Enteritidis | 1425  | 1268 |
| SAL_FA3351AA | 161080       | SRR3312589     | 2015 | 9  |    | Europe        | United Kingdom | Enteritidis             | Enteritidis | 1425  | 2313 |

|              |        |            |      |   |        |                |             |             |       |      |
|--------------|--------|------------|------|---|--------|----------------|-------------|-------------|-------|------|
| SAL_FA3352AA | 163138 | SRR3312579 | 2015 | 9 | Europe | United Kingdom | Enteritidis | Enteritidis | 1425  | 2467 |
| SAL_FA3353AA | 109930 | SRR3312578 | 2015 | 5 | Europe | United Kingdom | Enteritidis | Enteritidis | 1425  | 2479 |
| SAL_FA3354AA | 168359 | SRR3312577 | 2015 | 9 | Europe | United Kingdom | Enteritidis | Enteritidis | 1425  | 2478 |
| SAL_FA3355AA | 118939 | SRR3312576 | 2015 | 5 | Europe | United Kingdom | Enteritidis | Enteritidis | 1425  | 2387 |
| SAL_FA3356AA | 107120 | SRR3312559 | 2015 | 4 | Europe | United Kingdom | Enteritidis | Enteritidis | 1425  | 2254 |
| SAL_FA3357AA | 107108 | SRR3312551 | 2015 | 4 | Europe | United Kingdom | Enteritidis | Enteritidis | 1425  | 2477 |
| SAL_FA3358AA | 166331 | SRR3312550 | 2015 | 9 | Europe | United Kingdom | Enteritidis | Enteritidis | 1425  | 1268 |
| SAL_FA3359AA | 113051 | SRR3312549 | 2015 | 5 | Europe | United Kingdom | Enteritidis | Enteritidis | 1425  | 1274 |
| SAL_FA3360AA | 164712 | SRR3312548 | 2015 | 9 | Europe | United Kingdom | Enteritidis | Enteritidis | 1425  | 1268 |
| SAL_FA3361AA | 157364 | SRR3312547 | 2015 | 9 | Europe | United Kingdom | Enteritidis | Enteritidis | 1425  | 2163 |
| SAL_FA3362AA | 146108 | SRR3312546 | 2015 | 8 | Europe | United Kingdom | Enteritidis | Enteritidis | 1425  | 2313 |
| SAL_FA3363AA | 161864 | SRR3312545 | 2015 | 9 | Europe | United Kingdom | Enteritidis | Enteritidis | 1425  | 2476 |
| SAL_FA3364AA | 109246 | SRR3312539 | 2015 | 5 | Europe | United Kingdom | Enteritidis | Enteritidis | 1425  | 1274 |
| SAL_FA3365AA | 159649 | SRR3312533 | 2015 | 9 | Europe | United Kingdom | Enteritidis | Enteritidis | 1425  | 2475 |
| SAL_FA3366AA | 161077 | SRR3312531 | 2015 | 9 | Europe | United Kingdom | Enteritidis | Enteritidis | 1425  | 2474 |
| SAL_FA3367AA | 146095 | SRR3312530 | 2015 | 8 | Europe | United Kingdom | Enteritidis | Enteritidis | 1425  | 2473 |
| SAL_FA3368AA | 164967 | SRR3312529 | 2015 | 9 | Europe | United Kingdom | Enteritidis | Enteritidis | 1425  | 2472 |
| SAL_FA3369AA | 122194 | SRR3312528 | 2015 | 6 | Europe | United Kingdom | Enteritidis | Enteritidis | 1425  | 2471 |
| SAL_FA3370AA | 157283 | SRR3312525 | 2015 | 9 | Europe | United Kingdom | Enteritidis | Enteritidis | 1425  | 2470 |
| SAL_FA3371AA | 161871 | SRR3312520 | 2015 | 9 | Europe | United Kingdom | Enteritidis | Enteritidis | 1425  | 1268 |
| SAL_FA3372AA | 116053 | SRR3312514 | 2015 | 5 | Europe | United Kingdom | Enteritidis | Enteritidis | 1425  | 2469 |
| SAL_FA3373AA | 107752 | SRR3312513 | 2015 | 4 | Europe | United Kingdom | Enteritidis | Enteritidis | 1425  | 2468 |
| SAL_FA3374AA | 168362 | SRR3312512 | 2015 | 9 | Europe | United Kingdom | Enteritidis | Enteritidis | 1425  | 2467 |
| SAL_FA3375AA | 146110 | SRR3312492 | 2015 | 8 | Europe | United Kingdom | Enteritidis | Enteritidis | 1425  | 2163 |
| SAL_FA3376AA | 161872 | SRR3312356 | 2015 | 9 | Europe | United Kingdom | Enteritidis | Enteritidis | 1425  | 2466 |
| SAL_FA3377AA | 107320 | SRR3312348 | 2015 | 4 | Europe | United Kingdom | Enteritidis | Enteritidis | 1425  | 2465 |
| SAL_FA3378AA | 152400 | SRR3312345 | 2015 | 8 | Europe | United Kingdom | Enteritidis | Enteritidis | 1425  | 2464 |
| SAL_FA3379AA | 159682 | SRR3312344 | 2015 | 9 | Europe | United Kingdom | Enteritidis | Enteritidis | 1425  | 2463 |
| SAL_FA3380AA | 128188 | SRR3312343 | 2015 | 6 | Europe | United Kingdom | Enteritidis | Enteritidis | 1425  | 2462 |
| SAL_FA3381AA | 137127 | SRR3312342 | 2015 | 7 | Europe | United Kingdom | Enteritidis | Enteritidis | 1425  | 1275 |
| SAL_FA3382AA | 161878 | SRR3312341 | 2015 | 9 | Europe | United Kingdom | Enteritidis | Enteritidis | 1425  | 2461 |
| SAL_FA3383AA | 137141 | SRR3312340 | 2015 | 7 | Europe | United Kingdom | Enteritidis | Enteritidis | 1425  | 1275 |
| SAL_FA3384AA | 153195 | SRR3312339 | 2015 | 8 | Europe | United Kingdom | Enteritidis | Enteritidis | 1425  | 2460 |
| SAL_FA3385AA | 163124 | SRR3312337 | 2015 | 9 | Europe | United Kingdom | Enteritidis | Enteritidis | 1425  | 2459 |
| SAL_FA3386AA | 159003 | SRR3312335 | 2015 | 9 | Europe | United Kingdom | Enteritidis | Enteritidis | 1425  | 2507 |
| SAL_FA3387AA | 161079 | SRR3312324 | 2015 | 9 | Europe | United Kingdom | Enteritidis | Enteritidis | 1425  | 1268 |
| SAL_FA3388AA | 137142 | SRR3312312 | 2015 | 7 | Europe | United Kingdom | Enteritidis | Enteritidis | 1425  | 3166 |
| SAL_FA3389AA | 143546 | SRR3312300 | 2015 | 8 | Europe | United Kingdom | Enteritidis | Enteritidis | 1425  | 2506 |
| SAL_FA3390AA | 153191 | SRR3312277 | 2015 | 8 | Europe | United Kingdom | Enteritidis | Enteritidis | 1425  | 3165 |
| SAL_FA3391AA | 130502 | SRR3312276 | 2015 | 7 | Europe | United Kingdom | Enteritidis | Enteritidis | 1425  | 3164 |
| SAL_FA3392AA | 152486 | SRR3312187 | 2015 | 8 | Europe | United Kingdom | Enteritidis | Enteritidis | 1425  | 2505 |
| SAL_FA3393AA | 159667 | SRR3312174 | 2015 | 9 | Europe | United Kingdom | Enteritidis | Enteritidis | 1425  | 2504 |
| SAL_FA3394AA | 106554 | SRR3312173 | 2015 | 4 | Europe | United Kingdom | Enteritidis | Enteritidis | 1425  | 2254 |
| SAL_FA3395AA | 152395 | SRR3312161 | 2015 | 8 | Europe | United Kingdom | Enteritidis | Enteritidis | 1425  | 2503 |
| SAL_FA3396AA | 117272 | SRR3312073 | 2015 | 5 | Europe | United Kingdom | Enteritidis | Enteritidis | 1425  | 2254 |
| SAL_FA3397AA | 130504 | SRR3312072 | 2015 | 7 | Europe | United Kingdom | Enteritidis | Enteritidis | 1425  | 2458 |
| SAL_FA3404AA | 131447 | SRR3286970 | 2015 | 7 | Europe | United Kingdom | Enteritidis | Enteritidis | 26449 | 2452 |
| SAL_FA3406AA | 130304 | SRR3286968 | 2015 | 6 | Europe | United Kingdom | Enteritidis | Enteritidis | 1425  | 2450 |
| SAL_FA3410AA | 131511 | SRR3286964 | 2015 | 7 | Europe | United Kingdom | Enteritidis | Enteritidis | 1425  | 2446 |
| SAL_FA3412AA | 118957 | SRR3286962 | 2015 | 6 | Europe | United Kingdom | Enteritidis | Enteritidis | 1425  | 1995 |
| SAL_FA3417AA | 128232 | SRR3286957 | 2015 | 7 | Europe | United Kingdom | Enteritidis | Enteritidis | 3888  | 2440 |
| SAL_FA3420AA | 129371 | SRR3286954 | 2015 | 6 | Europe | United Kingdom | Enteritidis | Enteritidis | 1425  | 2437 |
| SAL_FA3421AA | 131458 | SRR3286952 | 2015 | 7 | Europe | United Kingdom | Enteritidis | Enteritidis | 26483 | 2119 |
| SAL_FA3422AA | 129437 | SRR3286951 | 2015 | 6 | Europe | United Kingdom | Enteritidis | Enteritidis | 1425  | 2436 |
| SAL_FA3426AA | 128227 | SRR3286947 | 2015 | 7 | Europe | United Kingdom | Enteritidis | Enteritidis | 3888  | 2432 |
| SAL_FA3429AA | 129439 | SRR3286944 | 2015 | 6 | Europe | United Kingdom | Enteritidis | Enteritidis | 26483 | 2430 |
| SAL_FA3430AA | 129404 | SRR3286943 | 2015 | 6 | Europe | United Kingdom | Enteritidis | Enteritidis | 1425  | 2429 |
| SAL_FA3431AA | 129410 | SRR3286942 | 2015 | 6 | Europe | United Kingdom | Enteritidis | Enteritidis | 1425  | 2428 |
| SAL_FA3432AA | 126846 | SRR3286941 | 2015 | 6 | Europe | United Kingdom | Enteritidis | Enteritidis | 35040 | 2427 |

|              |        |            |      |   |           |                |             |             |       |      |
|--------------|--------|------------|------|---|-----------|----------------|-------------|-------------|-------|------|
| SAL_FA3434AA | 128186 | SRR3286939 | 2015 | 6 | Europe    | United Kingdom | Enteritidis | Enteritidis | 3888  | 1632 |
| SAL_FA3435AA | 127545 | SRR3286938 | 2015 | 6 | Europe    | United Kingdom | Enteritidis | Enteritidis | 1425  | 2425 |
| SAL_FA3436AA | 128203 | SRR3286937 | 2015 | 6 | Europe    | United Kingdom | Enteritidis | Enteritidis | 1425  | 2424 |
| SAL_FA3438AA | 128229 | SRR3286935 | 2015 | 7 | Europe    | United Kingdom | Enteritidis | Enteritidis | 1425  | 717  |
| SAL_FA3439AA | 126180 | SRR3286934 | 2015 | 6 | Europe    | United Kingdom | Enteritidis | Enteritidis | 26493 | 2374 |
| SAL_FA3440AA | 128198 | SRR3286933 | 2015 | 6 | Europe    | United Kingdom | Enteritidis | Enteritidis | 1425  | 2422 |
| SAL_FA3442AA | 126087 | SRR3286930 | 2015 | 6 | Europe    | United Kingdom | Enteritidis | Enteritidis | 1425  | 2421 |
| SAL_FA3444AA | 129506 | SRR3286928 | 2015 | 7 | Europe    | United Kingdom | Enteritidis | Enteritidis | 1425  | 2419 |
| SAL_FA3448AA | 128180 | SRR3286924 | 2015 | 6 | Europe    | United Kingdom | Enteritidis | Enteritidis | 1425  | 2416 |
| SAL_FA3449AA | 126066 | SRR3286923 | 2015 | 6 | Europe    | United Kingdom | Enteritidis | Enteritidis | 27796 | 2415 |
| SAL_FA3452AA | 128172 | SRR3286919 | 2015 | 6 | Europe    | United Kingdom | Enteritidis | Enteritidis | 3888  | 2412 |
| SAL_FA3455AA | 126090 | SRR3286916 | 2015 | 6 | Europe    | United Kingdom | Enteritidis | Enteritidis | 28574 | 2409 |
| SAL_FA3460AA | 120627 | SRR3286909 | 2015 | 6 | Europe    | United Kingdom | Enteritidis | Enteritidis | 1425  | 2406 |
| SAL_FA3461AA | 126177 | SRR3286908 | 2015 | 6 | Europe    | United Kingdom | Enteritidis | Enteritidis | 1425  | 2254 |
| SAL_FA3462AA | 122202 | SRR3286907 | 2015 | 6 | Europe    | United Kingdom | Enteritidis | Enteritidis | 1425  | 2404 |
| SAL_FA3463AA | 120616 | SRR3286906 | 2015 | 6 | Europe    | United Kingdom | Enteritidis | Enteritidis | 1425  | 2405 |
| SAL_FA3467AA | 120625 | SRR3286902 | 2015 | 6 | Europe    | United Kingdom | Enteritidis | Enteritidis | 3888  | 2402 |
| SAL_FA3469AA | 109261 | SRR3286900 | 2015 | 5 | Europe    | United Kingdom | Enteritidis | Enteritidis | 1425  | 2400 |
| SAL_FA3479AA | 119502 | SRR3286886 | 2015 | 6 | 2 Europe  | United Kingdom | Enteritidis | Enteritidis | 1425  | 2392 |
| SAL_FA3482AA | 123914 | SRR3286880 | 2015 | 6 | Europe    | United Kingdom | Enteritidis | Enteritidis | 1425  | 2389 |
| SAL_FA3483AA | 119500 | SRR3286879 | 2015 | 6 | Europe    | United Kingdom | Enteritidis | Enteritidis | 1425  | 2388 |
| SAL_FA3484AA | 122192 | SRR3286877 | 2015 | 6 | Europe    | United Kingdom | Enteritidis | Enteritidis | 1425  | 2387 |
| SAL_FA3487AA | 120575 | SRR3286870 | 2015 | 4 | 30 Europe | United Kingdom | Enteritidis | Enteritidis | 35347 | 2385 |
| SAL_FA3491AA | 122699 | SRR3286863 | 2015 | 6 | 15 Europe | United Kingdom | Enteritidis | Enteritidis | 1425  | 2381 |
| SAL_FA3493AA | 123883 | SRR3286861 | 2015 | 6 | Europe    | United Kingdom | Enteritidis | Enteritidis | 1425  | 2379 |
| SAL_FA3494AA | 117250 | SRR3286860 | 2015 | 5 | Europe    | United Kingdom | Enteritidis | Enteritidis | 1425  | 2378 |
| SAL_FA3495AA | 123913 | SRR3286859 | 2015 | 6 | Europe    | United Kingdom | Enteritidis | Enteritidis | 26493 | 2377 |
| SAL_FA3498AA | 123863 | SRR3286856 | 2015 | 6 | Europe    | United Kingdom | Enteritidis | Enteritidis | 3888  | 2375 |
| SAL_FA3499AA | 123899 | SRR3286855 | 2015 | 6 | Europe    | United Kingdom | Enteritidis | Enteritidis | 26493 | 2374 |
| SAL_FA3501AA | 118882 | SRR3286853 | 2015 | 5 | Europe    | United Kingdom | Enteritidis | Enteritidis | 1425  | 2163 |
| SAL_FA3502AA | 122649 | SRR3286852 | 2015 | 6 | Europe    | United Kingdom | Enteritidis | Enteritidis | 1425  | 2372 |
| SAL_FA3504AA | 123862 | SRR3286850 | 2015 | 6 | Europe    | United Kingdom | Enteritidis | Enteritidis | 1425  | 2371 |
| SAL_FA3505AA | 121453 | SRR3286849 | 2015 | 6 | Europe    | United Kingdom | Enteritidis | Enteritidis | 3888  | 2370 |
| SAL_FA3509AA | 122682 | SRR3286836 | 2015 | 6 | 12 Europe | United Kingdom | Enteritidis | Enteritidis | 1425  | 2367 |
| SAL_FA3516AA | 121448 | SRR3286812 | 2015 | 6 | Europe    | United Kingdom | Enteritidis | Enteritidis | 1425  | 2361 |
| SAL_FA3517AA | 109254 | SRR3286811 | 2015 | 5 | Europe    | United Kingdom | Enteritidis | Enteritidis | 3888  | 2351 |
| SAL_FA3518AA | 115280 | SRR3286809 | 2015 | 5 | Europe    | United Kingdom | Enteritidis | Enteritidis | 1425  | 2360 |
| SAL_FA3520AA | 114071 | SRR3286778 | 2015 | 5 | Europe    | United Kingdom | Enteritidis | Enteritidis | 1425  | 2358 |
| SAL_FA3522AA | 117283 | SRR3286730 | 2015 | 5 | Europe    | United Kingdom | Enteritidis | Enteritidis | 1425  | 2357 |
| SAL_FA3527AA | 117301 | SRR3286718 | 2015 | 5 | Europe    | United Kingdom | Enteritidis | Enteritidis | 1425  | 2352 |
| SAL_FA3528AA | 114085 | SRR3286717 | 2015 | 5 | Europe    | United Kingdom | Enteritidis | Enteritidis | 3888  | 2351 |
| SAL_FA3534AA | 113499 | SRR3286711 | 2015 | 5 | Europe    | United Kingdom | Enteritidis | Enteritidis | 1425  | 2345 |
| SAL_FA3535AA | 116566 | SRR3286710 | 2015 | 5 | Europe    | United Kingdom | Enteritidis | Enteritidis | 1425  | 2344 |
| SAL_FA3537AA | 115274 | SRR3286708 | 2015 | 5 | Europe    | United Kingdom | Enteritidis | Enteritidis | 1425  | 2343 |
| SAL_FA3543AA | 113497 | SRR3286702 | 2015 | 5 | Europe    | United Kingdom | Enteritidis | Enteritidis | 1425  | 2337 |
| SAL_FA3544AA | 115281 | SRR3286701 | 2015 | 5 | Europe    | United Kingdom | Enteritidis | Enteritidis | 1425  | 2336 |
| SAL_FA3545AA | 114067 | SRR3286700 | 2015 | 5 | Europe    | United Kingdom | Enteritidis | Enteritidis | 1425  | 2299 |
| SAL_FA3547AA | 115273 | SRR3286698 | 2015 | 5 | Europe    | United Kingdom | Enteritidis | Enteritidis | 1425  | 2334 |
| SAL_FA3548AA | 114068 | SRR3286697 | 2015 | 5 | Europe    | United Kingdom | Enteritidis | Enteritidis | 1425  | 2299 |
| SAL_FA3551AA | 113001 | SRR3286694 | 2015 | 5 | Europe    | United Kingdom | Enteritidis | Enteritidis | 1425  | 2331 |
| SAL_FA3552AA | 106528 | SRR3286693 | 2015 | 4 | Europe    | United Kingdom | Enteritidis | Enteritidis | 3906  | 2330 |
| SAL_FA3553AA | 112986 | SRR3286692 | 2015 | 5 | Europe    | United Kingdom | Enteritidis | Enteritidis | 1425  | 2329 |
| SAL_FA3554AA | 109876 | SRR3286691 | 2015 | 5 | Europe    | United Kingdom | Enteritidis | Enteritidis | 1425  | 2328 |
| SAL_FA3555AA | 103758 | SRR3286690 | 2015 | 4 | Europe    | United Kingdom | Enteritidis | Enteritidis | 1425  | 2163 |
| SAL_FA3558AA | 115283 | SRR3286687 | 2015 | 5 | Europe    | United Kingdom | Enteritidis | Enteritidis | 1425  | 2325 |
| SAL_FA3560AA | 114038 | SRR3286685 | 2015 | 5 | Europe    | United Kingdom | Enteritidis | Enteritidis | 1425  | 2323 |
| SAL_FA3561AA | 106562 | SRR3286684 | 2015 | 4 | Europe    | United Kingdom | Enteritidis | Enteritidis | 7811  | 2322 |
| SAL_FA3564AA | 109873 | SRR3286681 | 2015 | 5 | Europe    | United Kingdom | Enteritidis | Enteritidis | 1425  | 2319 |
| SAL_FA3565AA | 105998 | SRR3286680 | 2015 | 4 | Europe    | United Kingdom | Enteritidis | Enteritidis | 1425  | 2318 |



|              |        |            |      |    |           |                |             |             |       |      |
|--------------|--------|------------|------|----|-----------|----------------|-------------|-------------|-------|------|
| SAL_FA3568AA | 112980 | SRR3286677 | 2015 | 5  | Europe    | United Kingdom | Enteritidis | Enteritidis | 1425  | 2315 |
| SAL_FA3570AA | 103763 | SRR3286675 | 2015 | 4  | Europe    | United Kingdom | Enteritidis | Enteritidis | 1425  | 2313 |
| SAL_FA3571AA | 113078 | SRR3286674 | 2015 | 5  | Europe    | United Kingdom | Enteritidis | Enteritidis | 1425  | 2312 |
| SAL_FA3575AA | 106032 | SRR3286670 | 2015 | 4  | Europe    | United Kingdom | Enteritidis | Enteritidis | 1425  | 503  |
| SAL_FA3576AA | 109919 | SRR3286669 | 2015 | 5  | Europe    | United Kingdom | Enteritidis | Enteritidis | 1425  | 2309 |
| SAL_FA3577AA | 110978 | SRR3286668 | 2015 | 5  | Europe    | United Kingdom | Enteritidis | Enteritidis | 3900  | 2308 |
| SAL_FA3579AA | 101448 | SRR3286666 | 2015 | 4  | Europe    | United Kingdom | Enteritidis | Enteritidis | 1425  | 2306 |
| SAL_FA3580AA | 106010 | SRR3286665 | 2015 | 4  | Europe    | United Kingdom | Enteritidis | Enteritidis | 1425  | 2157 |
| SAL_FA3583AA | 101460 | SRR3286661 | 2015 | 4  | Europe    | United Kingdom | Enteritidis | Enteritidis | 1425  | 2303 |
| SAL_FA3585AA | 103655 | SRR3286659 | 2015 | 4  | Europe    | United Kingdom | Enteritidis | Enteritidis | 3888  | 2301 |
| SAL_FA3587AA | 103731 | SRR3286657 | 2015 | 4  | Europe    | United Kingdom | Enteritidis | Enteritidis | 1425  | 2163 |
| SAL_FA3588AA | 103618 | SRR3286656 | 2015 | 4  | Europe    | United Kingdom | Enteritidis | Enteritidis | 1425  | 2300 |
| SAL_FA3589AA | 103724 | SRR3286655 | 2015 | 4  | Europe    | United Kingdom | Enteritidis | Enteritidis | 1425  | 2299 |
| SAL_FA3590AA | 113040 | SRR3286649 | 2015 | 5  | Europe    | United Kingdom | Enteritidis | Enteritidis | 1425  | 2298 |
| SAL_FA3592AA | 109918 | SRR3286647 | 2015 | 5  | Europe    | United Kingdom | Enteritidis | Enteritidis | 1425  | 2296 |
| SAL_FA3594AA | 103642 | SRR3286645 | 2015 | 4  | Europe    | United Kingdom | Enteritidis | Enteritidis | 1425  | 2294 |
| SAL_FA3596AA | 103607 | SRR3286643 | 2015 | 4  | Europe    | United Kingdom | Enteritidis | Enteritidis | 1425  | 2292 |
| SAL_FA3599AA | 101470 | SRR3286639 | 2015 | 4  | Europe    | United Kingdom | Enteritidis | Enteritidis | 1425  | 2291 |
| SAL_FA3600AA | 113022 | SRR3286638 | 2015 | 5  | Europe    | United Kingdom | Enteritidis | Enteritidis | 1425  | 2290 |
| SAL_FA3602AA | 106576 | SRR3286636 | 2015 | 4  | Europe    | United Kingdom | Enteritidis | Enteritidis | 1425  | 1274 |
| SAL_FA3603AA | 101434 | SRR3286635 | 2015 | 4  | Europe    | United Kingdom | Enteritidis | Enteritidis | 1425  | 2288 |
| SAL_FA3606AA | 107233 | SRR3286632 | 2015 | 4  | Europe    | United Kingdom | Enteritidis | Enteritidis | 1425  | 2254 |
| SAL_FA3608AA | 101458 | SRR3286630 | 2015 | 4  | Europe    | United Kingdom | Enteritidis | Enteritidis | 1425  | 2285 |
| SAL_FA3609AA | 113033 | SRR3286629 | 2015 | 5  | Europe    | United Kingdom | Enteritidis | Enteritidis | 1425  | 2284 |
| SAL_FA3610AA | 101462 | SRR3286628 | 2015 | 4  | Europe    | United Kingdom | Enteritidis | Enteritidis | 1425  | 2283 |
| SAL_FA3612AA | 106517 | SRR3286626 | 2015 | 4  | Europe    | United Kingdom | Enteritidis | Enteritidis | 1425  | 2281 |
| SAL_FA3613AA | 104256 | SRR3286624 | 2015 | 4  | Europe    | United Kingdom | Enteritidis | Enteritidis | 1425  | 2280 |
| SAL_FA3615AA | 113032 | SRR3286622 | 2015 | 5  | Europe    | United Kingdom | Enteritidis | Enteritidis | 1425  | 2278 |
| SAL_FA3616AA | 106510 | SRR3286621 | 2015 | 4  | Europe    | United Kingdom | Enteritidis | Enteritidis | 1425  | 2277 |
| SAL_FA3618AA | 107747 | SRR3286619 | 2015 | 4  | Europe    | United Kingdom | Enteritidis | Enteritidis | 1425  | 2274 |
| SAL_FA3621AA | 106521 | SRR3286615 | 2015 | 4  | Europe    | United Kingdom | Enteritidis | Enteritidis | 1425  | 2272 |
| SAL_FA3622AA | 106523 | SRR3286614 | 2015 | 4  | Europe    | United Kingdom | Enteritidis | Enteritidis | 1425  | 2271 |
| SAL_FA3623AA | 101443 | SRR3286613 | 2015 | 4  | Europe    | United Kingdom | Enteritidis | Enteritidis | 1425  | 2270 |
| SAL_FA3625AA | 106564 | SRR3286611 | 2015 | 4  | Europe    | United Kingdom | Enteritidis | Enteritidis | 1425  | 2269 |
| SAL_FA3626AA | 101465 | SRR3286610 | 2015 | 4  | Europe    | United Kingdom | Enteritidis | Enteritidis | 1425  | 2268 |
| SAL_FA3627AA | 107119 | SRR3286609 | 2015 | 4  | Europe    | United Kingdom | Enteritidis | Enteritidis | 1425  | 2254 |
| SAL_FA3630AA | 101313 | SRR3286606 | 2015 | 4  | Europe    | United Kingdom | Enteritidis | Enteritidis | 1425  | 2266 |
| SAL_FA3631AA | 103747 | SRR3286605 | 2015 | 4  | Europe    | United Kingdom | Enteritidis | Enteritidis | 1425  | 2265 |
| SAL_FA3633AA | 106553 | SRR3286603 | 2015 | 4  | Europe    | United Kingdom | Enteritidis | Enteritidis | 1425  | 2263 |
| SAL_FA3634AA | 104253 | SRR3286602 | 2015 | 4  | 20 Europe | United Kingdom | Enteritidis | Enteritidis | 1425  | 2262 |
| SAL_FA3635AA | 107750 | SRR3286601 | 2015 | 4  | Europe    | United Kingdom | Enteritidis | Enteritidis | 1425  | 2261 |
| SAL_FA3640AA | 101331 | SRR3286596 | 2015 | 4  | Europe    | United Kingdom | Enteritidis | Enteritidis | 1425  | 2257 |
| SAL_FA3643AA | 107296 | SRR3286593 | 2015 | 4  | Europe    | United Kingdom | Enteritidis | Enteritidis | 1425  | 2254 |
| SAL_FA3646AA | 101468 | SRR3286590 | 2015 | 4  | Europe    | United Kingdom | Enteritidis | Enteritidis | 1425  | 2251 |
| SAL_FA3650AA | 100742 | SRR3286586 | 2015 | 4  | Europe    | United Kingdom | Enteritidis | Enteritidis | 1425  | 2247 |
| SAL_FA3651AA | 100495 | SRR3286585 | 2015 | 4  | Europe    | United Kingdom | Enteritidis | Enteritidis | 1425  | 2246 |
| SAL_FA3652AA | 105328 | SRR3286584 | 2015 | 4  | Europe    | United Kingdom | Enteritidis | Enteritidis | 1425  | 2245 |
| SAL_FA3653AA | 103641 | SRR3286583 | 2015 | 4  | Europe    | United Kingdom | Enteritidis | Enteritidis | 1425  | 2244 |
| SAL_FA3655AA | 103767 | SRR3286581 | 2015 | 4  | Europe    | United Kingdom | Enteritidis | Enteritidis | 1425  | 2242 |
| SAL_FA3660AA | 103645 | SRR3286576 | 2015 | 4  | Europe    | United Kingdom | Enteritidis | Enteritidis | 1425  | 2237 |
| SAL_FA3661AA | 100738 | SRR3286575 | 2015 | 4  | Europe    | United Kingdom | Enteritidis | Enteritidis | 28005 | 2236 |
| SAL_FA3662AA | 100733 | SRR3286574 | 2015 | 4  | Europe    | United Kingdom | Enteritidis | Enteritidis | 1425  | 2235 |
| SAL_FA3663AA | 106518 | SRR3286573 | 2015 | 4  | Europe    | United Kingdom | Enteritidis | Enteritidis | 1425  | 2234 |
| SAL_FA3664AA | 103629 | SRR3286572 | 2015 | 4  | Europe    | United Kingdom | Enteritidis | Enteritidis | 3897  | 2233 |
| SAL_FA3665AA | 107131 | SRR3286571 | 2015 | 4  | Europe    | United Kingdom | Enteritidis | Enteritidis | 1425  | 2232 |
| SAL_FA3667AA | 100736 | SRR3286569 | 2015 | 4  | Europe    | United Kingdom | Enteritidis | Enteritidis | 1425  | 2230 |
| SAL_FA3668AA | 107096 | SRR3286568 | 2015 | 4  | Europe    | United Kingdom | Enteritidis | Enteritidis | 1425  | 2229 |
| SAL_FA3672AA | 129359 | SRR3285500 | 2015 | 6  | Europe    | United Kingdom | Enteritidis | Enteritidis | 1425  | 1808 |
| SAL_FA3674AA | 178855 | SRR3285498 | 2015 | 10 | Europe    | United Kingdom | Enteritidis | Enteritidis | 1425  | 2224 |

|              |        |            |      |    |           |                |             |             |       |      |
|--------------|--------|------------|------|----|-----------|----------------|-------------|-------------|-------|------|
| SAL_FA3675AA | 166184 | SRR3285497 | 2015 | 9  | Europe    | United Kingdom | Enteritidis | Enteritidis | 1425  | 2223 |
| SAL_FA3676AA | 48168  | SRR3285496 | 2014 | 9  | Europe    | United Kingdom | Enteritidis | Enteritidis | 1425  | 2222 |
| SAL_FA3677AA | 178691 | SRR3285495 | 2015 | 10 | Europe    | United Kingdom | Enteritidis | Enteritidis | 1425  | 2221 |
| SAL_FA3678AA | 137140 | SRR3285494 | 2015 | 7  | Europe    | United Kingdom | Enteritidis | Enteritidis | 1425  | 2220 |
| SAL_FA3679AA | 169597 | SRR3285493 | 2015 | 9  | Europe    | United Kingdom | Enteritidis | Enteritidis | 1425  | 2219 |
| SAL_FA3680AA | 143958 | SRR3285492 | 2015 | 8  | Europe    | United Kingdom | Enteritidis | Enteritidis | 3888  | 2218 |
| SAL_FA3684AA | 192871 | SRR3285488 | 2015 | 11 | Europe    | United Kingdom | Enteritidis | Enteritidis | 1425  | 2216 |
| SAL_FA3686AA | 170325 | SRR3285486 | 2015 | 9  | Europe    | United Kingdom | Enteritidis | Enteritidis | 1425  | 2214 |
| SAL_FA3687AA | 109245 | SRR3285485 | 2015 | 5  | Europe    | United Kingdom | Enteritidis | Enteritidis | 1425  | 1274 |
| SAL_FA3688AA | 189248 | SRR3285484 | 2015 | 11 | Europe    | United Kingdom | Enteritidis | Enteritidis | 1425  | 2213 |
| SAL_FA3691AA | 126065 | SRR3285481 | 2015 | 6  | Europe    | United Kingdom | Enteritidis | Enteritidis | 1425  | 2210 |
| SAL_FA3692AA | 171186 | SRR3285480 | 2015 | 10 | Europe    | United Kingdom | Enteritidis | Enteritidis | 1425  | 2163 |
| SAL_FA3693AA | 146123 | SRR3285479 | 2015 | 8  | Europe    | United Kingdom | Enteritidis | Enteritidis | 3888  | 2209 |
| SAL_FA3697AA | 176346 | SRR3285475 | 2015 | 10 | Europe    | United Kingdom | Enteritidis | Enteritidis | 1425  | 1408 |
| SAL_FA3698AA | 142688 | SRR3285474 | 2015 | 8  | Europe    | United Kingdom | Enteritidis | Enteritidis | 1425  | 2205 |
| SAL_FA3700AA | 164973 | SRR3285472 | 2015 | 9  | Europe    | United Kingdom | Enteritidis | Enteritidis | 1425  | 1990 |
| SAL_FA3702AA | 170334 | SRR3285470 | 2015 | 9  | 17 Europe | United Kingdom | Enteritidis | Enteritidis | 1425  | 2203 |
| SAL_FA3708AA | 121459 | SRR3285464 | 2015 | 6  | Europe    | United Kingdom | Enteritidis | Enteritidis | 1425  | 2198 |
| SAL_FA3709AA | 170408 | SRR3285463 | 2015 | 9  | Europe    | United Kingdom | Enteritidis | Enteritidis | 3888  | 2197 |
| SAL_FA3710AA | 180813 | SRR3285462 | 2015 | 9  | 10 Europe | United Kingdom | Enteritidis | Enteritidis | 1425  | 2196 |
| SAL_FA3713AA | 157325 | SRR3285459 | 2015 | 9  | Europe    | United Kingdom | Enteritidis | Enteritidis | 1425  | 2194 |
| SAL_FA3715AA | 135156 | SRR3285457 | 2015 | 7  | Europe    | United Kingdom | Enteritidis | Enteritidis | 3888  | 2193 |
| SAL_FA3719AA | 182010 | SRR3285453 | 2015 | 10 | Europe    | United Kingdom | Enteritidis | Enteritidis | 1425  | 2189 |
| SAL_FA3723AA | 142218 | SRR3285449 | 2015 | 8  | Europe    | United Kingdom | Enteritidis | Enteritidis | 1425  | 2185 |
| SAL_FA3724AA | 172293 | SRR3285448 | 2015 | 10 | Europe    | United Kingdom | Enteritidis | Enteritidis | 3888  | 2184 |
| SAL_FA3725AA | 171322 | SRR3285447 | 2015 | 10 | Europe    | United Kingdom | Enteritidis | Enteritidis | 1425  | 2183 |
| SAL_FA3728AA | 180569 | SRR3285444 | 2015 | 10 | Europe    | United Kingdom | Enteritidis | Enteritidis | 3888  | 2180 |
| SAL_FA3729AA | 174748 | SRR3285443 | 2015 | 10 | Europe    | United Kingdom | Enteritidis | Enteritidis | 3888  | 2179 |
| SAL_FA3731AA | 198247 | SRR3285441 | 2015 | 12 | Europe    | United Kingdom | Enteritidis | Enteritidis | 1425  | 2177 |
| SAL_FA3736AA | 121429 | SRR3285436 | 2015 | 6  | Europe    | United Kingdom | Enteritidis | Enteritidis | 1425  | 2172 |
| SAL_FA3739AA | 122279 | SRR3285433 | 2015 | 6  | Europe    | United Kingdom | Enteritidis | Enteritidis | 1425  | 2169 |
| SAL_FA3741AA | 161875 | SRR3285431 | 2015 | 9  | Europe    | United Kingdom | Enteritidis | Enteritidis | 1425  | 2167 |
| SAL_FA3747AA | 103640 | SRR3285424 | 2015 | 4  | Europe    | United Kingdom | Enteritidis | Enteritidis | 1425  | 2163 |
| SAL_FA3748AA | 106547 | SRR3285423 | 2015 | 4  | Europe    | United Kingdom | Enteritidis | Enteritidis | 1425  | 2162 |
| SAL_FA3754AA | 104249 | SRR3285417 | 2015 | 4  | Europe    | United Kingdom | Enteritidis | Enteritidis | 1425  | 2157 |
| SAL_FA3755AA | 146116 | SRR3285416 | 2015 | 8  | 12 Europe | United Kingdom | Enteritidis | Enteritidis | 1425  | 2156 |
| SAL_FA3756AA | 200657 | SRR3285415 | 2015 | 12 | Europe    | United Kingdom | Enteritidis | Enteritidis | 1425  | 2155 |
| SAL_FA3760AA | 181056 | SRR3285411 | 2015 | 10 | Europe    | United Kingdom | Enteritidis | Enteritidis | 1425  | 2152 |
| SAL_FA3761AA | 135063 | SRR3285410 | 2015 | 7  | Europe    | United Kingdom | Enteritidis | Enteritidis | 3888  | 2151 |
| SAL_FA3762AA | 193285 | SRR3285409 | 2015 | 12 | Europe    | United Kingdom | Enteritidis | Enteritidis | 1425  | 2097 |
| SAL_FA3764AA | 152452 | SRR3285407 | 2015 | 8  | Europe    | United Kingdom | Enteritidis | Enteritidis | 26493 | 2149 |
| SAL_FA3767AA | 107125 | SRR3285404 | 2015 | 4  | Europe    | United Kingdom | Enteritidis | Enteritidis | 26493 | 2147 |
| SAL_FA3768AA | 142494 | SRR3285403 | 2015 | 7  | Europe    | United Kingdom | Enteritidis | Enteritidis | 1425  | 2146 |
| SAL_FA3776AA | 133213 | SRR3285395 | 2015 | 7  | Europe    | United Kingdom | Enteritidis | Enteritidis | 1425  | 2139 |
| SAL_FA3777AA | 166228 | SRR3285394 | 2015 | 9  | Europe    | United Kingdom | Enteritidis | Enteritidis | 26493 | 2018 |
| SAL_FA3778AA | 170466 | SRR3285393 | 2015 | 10 | Europe    | United Kingdom | Enteritidis | Enteritidis | 1425  | 2138 |
| SAL_FA3780AA | 187543 | SRR3285391 | 2015 | 11 | Europe    | United Kingdom | Enteritidis | Enteritidis | 3888  | 2007 |
| SAL_FA3781AA | 158997 | SRR3285390 | 2015 | 9  | Europe    | United Kingdom | Enteritidis | Enteritidis | 3888  | 2136 |
| SAL_FA3782AA | 130369 | SRR3285389 | 2015 | 6  | Europe    | United Kingdom | Enteritidis | Enteritidis | 26493 | 2135 |
| SAL_FA3783AA | 179841 | SRR3285386 | 2015 | 10 | Europe    | United Kingdom | Enteritidis | Enteritidis | 34197 | 2134 |
| SAL_FA3784AA | 185449 | SRR3285385 | 2015 | 11 | Europe    | United Kingdom | Enteritidis | Enteritidis | 1425  | 1990 |
| SAL_FA3787AA | 179798 | SRR3285382 | 2015 | 10 | Europe    | United Kingdom | Enteritidis | Enteritidis | 1425  | 1990 |
| SAL_FA3788AA | 140241 | SRR3285381 | 2015 | 7  | Europe    | United Kingdom | Enteritidis | Enteritidis | 1425  | 2131 |
| SAL_FA3792AA | 152434 | SRR3285377 | 2015 | 8  | Europe    | United Kingdom | Enteritidis | Enteritidis | 3888  | 2127 |
| SAL_FA3796AA | 118884 | SRR3285373 | 2015 | 5  | Europe    | United Kingdom | Enteritidis | Enteritidis | 1425  | 2123 |
| SAL_FA3797AA | 118870 | SRR3285372 | 2015 | 5  | Europe    | United Kingdom | Enteritidis | Enteritidis | 1425  | 2122 |
| SAL_FA3798AA | 149324 | SRR3285371 | 2015 | 8  | Europe    | United Kingdom | Enteritidis | Enteritidis | 1425  | 2121 |
| SAL_FA3799AA | 123846 | SRR3285370 | 2015 | 6  | Europe    | United Kingdom | Enteritidis | Enteritidis | 26493 | 2120 |
| SAL_FA3800AA | 163160 | SRR3285369 | 2015 | 9  | Europe    | United Kingdom | Enteritidis | Enteritidis | 26483 | 2119 |

|              |        |            |      |    |           |                |             |             |       |      |
|--------------|--------|------------|------|----|-----------|----------------|-------------|-------------|-------|------|
| SAL_FA3804AA | 175615 | SRR3285365 | 2015 | 10 | Europe    | United Kingdom | Enteritidis | Enteritidis | 3888  | 2116 |
| SAL_FA3806AA | 142224 | SRR3285363 | 2015 | 8  | Europe    | United Kingdom | Enteritidis | Enteritidis | 1425  | 2115 |
| SAL_FA3807AA | 143571 | SRR3285362 | 2015 | 8  | Europe    | United Kingdom | Enteritidis | Enteritidis | 1425  | 2069 |
| SAL_FA3808AA | 171340 | SRR3285361 | 2015 | 9  | Europe    | United Kingdom | Enteritidis | Enteritidis | 1425  | 2114 |
| SAL_FA3813AA | 178704 | SRR3285355 | 2015 | 10 | Europe    | United Kingdom | Enteritidis | Enteritidis | 1425  | 2109 |
| SAL_FA3815AA | 159662 | SRR3285353 | 2015 | 9  | Europe    | United Kingdom | Enteritidis | Enteritidis | 3888  | 2002 |
| SAL_FA3816AA | 135064 | SRR3285352 | 2015 | 7  | Europe    | United Kingdom | Enteritidis | Enteritidis | 1425  | 2107 |
| SAL_FA3818AA | 169663 | SRR3285350 | 2015 | 9  | Europe    | United Kingdom | Enteritidis | Enteritidis | 8185  | 2105 |
| SAL_FA3823AA | 186568 | SRR3285345 | 2015 | 11 | Europe    | United Kingdom | Enteritidis | Enteritidis | 1425  | 2100 |
| SAL_FA3824AA | 174648 | SRR3285344 | 2015 | 9  | Europe    | United Kingdom | Enteritidis | Enteritidis | 1425  | 2099 |
| SAL_FA3825AA | 189183 | SRR3285343 | 2015 | 11 | Europe    | United Kingdom | Enteritidis | Enteritidis | 3888  | 2098 |
| SAL_FA3826AA | 120597 | SRR3285342 | 2015 | 6  | Europe    | United Kingdom | Enteritidis | Enteritidis | 1425  | 2097 |
| SAL_FA3828AA | 112994 | SRR3285339 | 2015 | 5  | Europe    | United Kingdom | Enteritidis | Enteritidis | 1425  | 2095 |
| SAL_FA3830AA | 126091 | SRR3285284 | 2015 | 6  | Europe    | United Kingdom | Enteritidis | Enteritidis | 1425  | 2093 |
| SAL_FA3831AA | 133214 | SRR3285283 | 2015 | 7  | 14 Europe | United Kingdom | Enteritidis | Enteritidis | 1425  | 2092 |
| SAL_FA3834AA | 184423 | SRR3285280 | 2015 | 11 | Europe    | United Kingdom | Enteritidis | Enteritidis | 1425  | 1990 |
| SAL_FA3836AA | 136785 | SRR3285278 | 2015 | 7  | Europe    | United Kingdom | Enteritidis | Enteritidis | 1425  | 2088 |
| SAL_FA3837AA | 131518 | SRR3285254 | 2015 | 7  | Europe    | United Kingdom | Enteritidis | Enteritidis | 1425  | 2087 |
| SAL_FA3839AA | 106567 | SRR3285245 | 2015 | 4  | Europe    | United Kingdom | Enteritidis | Enteritidis | 1425  | 2085 |
| SAL_FA3840AA | 206728 | SRR3285244 | 2016 | 1  | 12 Europe | United Kingdom | Enteritidis | Enteritidis | 1425  | 2084 |
| SAL_FA3844AA | 183662 | SRR3285109 | 2015 | 10 | 27 Europe | United Kingdom | Enteritidis | Enteritidis | 1425  | 2080 |
| SAL_FA3849AA | 190586 | SRR3285054 | 2015 | 11 | Europe    | United Kingdom | Enteritidis | Enteritidis | 1425  | 2077 |
| SAL_FA3852AA | 159715 | SRR3284869 | 2015 | 9  | Europe    | United Kingdom | Enteritidis | Enteritidis | 1425  | 1948 |
| SAL_FA3853AA | 105339 | SRR3284868 | 2015 | 4  | Europe    | United Kingdom | Enteritidis | Enteritidis | 1425  | 2074 |
| SAL_FA3855AA | 103255 | SRR3284861 | 2015 | 4  | Europe    | United Kingdom | Enteritidis | Enteritidis | 1425  | 2072 |
| SAL_FA3856AA | 169668 | SRR3284856 | 2015 | 9  | Europe    | United Kingdom | Enteritidis | Enteritidis | 1425  | 2071 |
| SAL_FA3858AA | 143570 | SRR3284852 | 2015 | 8  | Europe    | United Kingdom | Enteritidis | Enteritidis | 1425  | 2069 |
| SAL_FA3860AA | 182159 | SRR3284850 | 2015 | 10 | Europe    | United Kingdom | Enteritidis | Enteritidis | 1425  | 2067 |
| SAL_FA3861AA | 149212 | SRR3284849 | 2015 | 8  | Europe    | United Kingdom | Enteritidis | Enteritidis | 3888  | 2066 |
| SAL_FA3862AA | 176277 | SRR3284848 | 2015 | 10 | Europe    | United Kingdom | Enteritidis | Enteritidis | 1425  | 2065 |
| SAL_FA3864AA | 158933 | SRR3284846 | 2015 | 9  | Europe    | United Kingdom | Enteritidis | Enteritidis | 1425  | 2063 |
| SAL_FA3866AA | 181051 | SRR3284844 | 2015 | 10 | Europe    | United Kingdom | Enteritidis | Enteritidis | 1425  | 2062 |
| SAL_FA3867AA | 172472 | SRR3284843 | 2015 | 10 | Europe    | United Kingdom | Enteritidis | Enteritidis | 1425  | 1957 |
| SAL_FA3870AA | 166231 | SRR3284840 | 2015 | 9  | Europe    | United Kingdom | Enteritidis | Enteritidis | 1425  | 2059 |
| SAL_FA3872AA | 149231 | SRR3284838 | 2015 | 8  | Europe    | United Kingdom | Enteritidis | Enteritidis | 1425  | 2057 |
| SAL_FA3873AA | 107309 | SRR3284837 | 2015 | 4  | Europe    | United Kingdom | Enteritidis | Enteritidis | 26493 | 2056 |
| SAL_FA3874AA | 109938 | SRR3284836 | 2015 | 5  | Europe    | United Kingdom | Enteritidis | Enteritidis | 1425  | 2055 |
| SAL_FA3875AA | 144002 | SRR3284835 | 2015 | 8  | Europe    | United Kingdom | Enteritidis | Enteritidis | 1425  | 2054 |
| SAL_FA3877AA | 175539 | SRR3284833 | 2015 | 9  | Europe    | United Kingdom | Enteritidis | Enteritidis | 1425  | 613  |
| SAL_FA3883AA | 188175 | SRR3284827 | 2015 | 11 | Europe    | United Kingdom | Enteritidis | Enteritidis | 1425  | 2016 |
| SAL_FA3884AA | 122697 | SRR3284826 | 2015 | 6  | Europe    | United Kingdom | Enteritidis | Enteritidis | 26493 | 2047 |
| SAL_FA3886AA | 160809 | SRR3284824 | 2015 | 9  | Europe    | United Kingdom | Enteritidis | Enteritidis | 3888  | 2045 |
| SAL_FA3888AA | 169671 | SRR3284822 | 2015 | 9  | Europe    | United Kingdom | Enteritidis | Enteritidis | 1425  | 2043 |
| SAL_FA3890AA | 204008 | SRR3284820 | 2016 | 1  | Europe    | United Kingdom | Enteritidis | Enteritidis | 1425  | 2041 |
| SAL_FA3893AA | 121447 | SRR3284817 | 2015 | 6  | Europe    | United Kingdom | Enteritidis | Enteritidis | 1425  | 2039 |
| SAL_FA3895AA | 191967 | SRR3284815 | 2015 | 11 | Europe    | United Kingdom | Enteritidis | Enteritidis | 3888  | 2037 |
| SAL_FA3902AA | 176347 | SRR3284808 | 2015 | 10 | Europe    | United Kingdom | Enteritidis | Enteritidis | 1425  | 2030 |
| SAL_FA3904AA | 174783 | SRR3284805 | 2015 | 10 | Europe    | United Kingdom | Enteritidis | Enteritidis | 1425  | 2028 |
| SAL_FA3907AA | 161866 | SRR3284782 | 2015 | 9  | Europe    | United Kingdom | Enteritidis | Enteritidis | 3888  | 2023 |
| SAL_FA3911AA | 158994 | SRR3284775 | 2015 | 9  | Europe    | United Kingdom | Enteritidis | Enteritidis | 3888  | 2023 |
| SAL_FA3912AA | 190575 | SRR3284774 | 2015 | 11 | Europe    | United Kingdom | Enteritidis | Enteritidis | 1425  | 2022 |
| SAL_FA3913AA | 197074 | SRR3284773 | 2015 | 12 | 4 Europe  | United Kingdom | Enteritidis | Enteritidis | 1425  | 2021 |
| SAL_FA3914AA | 100737 | SRR3284772 | 2015 | 4  | Europe    | United Kingdom | Enteritidis | Enteritidis | 3888  | 2020 |
| SAL_FA3915AA | 128174 | SRR3284771 | 2015 | 6  | Europe    | United Kingdom | Enteritidis | Enteritidis | 1425  | 2019 |
| SAL_FA3916AA | 191951 | SRR3284770 | 2015 | 11 | Europe    | United Kingdom | Enteritidis | Enteritidis | 1425  | 2016 |
| SAL_FA3917AA | 157319 | SRR3284769 | 2015 | 8  | Europe    | United Kingdom | Enteritidis | Enteritidis | 26493 | 2018 |
| SAL_FA3919AA | 189189 | SRR3284766 | 2015 | 11 | Europe    | United Kingdom | Enteritidis | Enteritidis | 1425  | 2016 |
| SAL_FA3923AA | 140604 | SRR3284762 | 2015 | 7  | Europe    | United Kingdom | Enteritidis | Enteritidis | 1425  | 1275 |
| SAL_FA3925AA | 131459 | SRR3284759 | 2015 | 7  | Europe    | United Kingdom | Enteritidis | Enteritidis | 26483 | 2011 |

|              |             |            |      |    |               |                |             |             |       |      |
|--------------|-------------|------------|------|----|---------------|----------------|-------------|-------------|-------|------|
| SAL_FA3929AA | 182868      | SRR3284755 | 2015 | 11 | Europe        | United Kingdom | Enteritidis | Enteritidis | 3888  | 2007 |
| SAL_FA3934AA | 154870      | SRR3284750 | 2015 | 9  | Europe        | United Kingdom | Enteritidis | Enteritidis | 3888  | 2002 |
| SAL_FA3938AA | 109931      | SRR3284746 | 2015 | 5  | Europe        | United Kingdom | Enteritidis | Enteritidis | 1425  | 1274 |
| SAL_FA3939AA | 178676      | SRR3284745 | 2015 | 10 | Europe        | United Kingdom | Enteritidis | Enteritidis | 1425  | 1998 |
| SAL_FA3942AA | 190564      | SRR3284742 | 2015 | 11 | Europe        | United Kingdom | Enteritidis | Enteritidis | 1425  | 1995 |
| SAL_FA3944AA | 107094      | SRR3284740 | 2015 | 4  | Europe        | United Kingdom | Enteritidis | Enteritidis | 1425  | 1993 |
| SAL_FA3946AA | 142529      | SRR3284738 | 2015 | 8  | Europe        | United Kingdom | Enteritidis | Enteritidis | 26493 | 1991 |
| SAL_FA3947AA | 163142      | SRR3284737 | 2015 | 9  | Europe        | United Kingdom | Enteritidis | Enteritidis | 1425  | 1990 |
| SAL_FA3948AA | 134013      | SRR3284736 | 2015 | 7  | 15 Europe     | United Kingdom | Enteritidis | Enteritidis | 35071 | 1989 |
| SAL_FA3949AA | 131461      | SRR3284735 | 2015 | 7  | Europe        | United Kingdom | Enteritidis | Enteritidis | 1425  | 1988 |
| SAL_FA3952AA | 170467      | SRR3284732 | 2015 | 10 | Europe        | United Kingdom | Enteritidis | Enteritidis | 1425  | 1268 |
| SAL_FA3955AA | 109267      | SRR3284729 | 2015 | 5  | Europe        | United Kingdom | Enteritidis | Enteritidis | 1425  | 1983 |
| SAL_FA3960AA | 164956      | SRR3284724 | 2015 | 9  | Europe        | United Kingdom | Enteritidis | Enteritidis | 1425  | 1979 |
| SAL_FA3963AA | 166245      | SRR3284721 | 2015 | 9  | 23 Europe     | United Kingdom | Enteritidis | Enteritidis | 35377 | 1976 |
| SAL_FA3964AA | 164874      | SRR3284720 | 2015 | 9  | Europe        | United Kingdom | Enteritidis | Enteritidis | 1425  | 1975 |
| SAL_FA3966AA | 182816      | SRR3284718 | 2015 | 11 | Europe        | United Kingdom | Enteritidis | Enteritidis | 1425  | 1973 |
| SAL_FA3971AA | 128230      | SRR3284713 | 2015 | 7  | Europe        | United Kingdom | Enteritidis | Enteritidis | 1425  | 1969 |
| SAL_FA3972AA | 164816      | SRR3284712 | 2015 | 9  | Europe        | United Kingdom | Enteritidis | Enteritidis | 1425  | 1968 |
| SAL_FA3974AA | 158998      | SRR3284710 | 2015 | 9  | Europe        | United Kingdom | Enteritidis | Enteritidis | 1425  | 1966 |
| SAL_FA3976AA | 180566      | SRR3284708 | 2015 | 10 | Europe        | United Kingdom | Enteritidis | Enteritidis | 1425  | 1964 |
| SAL_FA3977AA | 196423      | SRR3284707 | 2015 | 12 | Europe        | United Kingdom | Enteritidis | Enteritidis | 1425  | 1963 |
| SAL_FA3978AA | 179657      | SRR3284694 | 2015 | 10 | Europe        | United Kingdom | Enteritidis | Enteritidis | 26493 | 1962 |
| SAL_FA3980AA | 132044      | SRR3284692 | 2015 | 7  | Europe        | United Kingdom | Enteritidis | Enteritidis | 1425  | 1960 |
| SAL_FA3982AA | 106516      | SRR3284690 | 2015 | 4  | Europe        | United Kingdom | Enteritidis | Enteritidis | 1425  | 1958 |
| SAL_FA3983AA | 185901      | SRR3284689 | 2015 | 11 | 3 Europe      | United Kingdom | Enteritidis | Enteritidis | 1425  | 1957 |
| SAL_FA3984AA | 143653      | SRR3284688 | 2015 | 8  | Europe        | United Kingdom | Enteritidis | Enteritidis | 1425  | 1956 |
| SAL_FA3985AA | 199911      | SRR3284687 | 2015 | 12 | Europe        | United Kingdom | Enteritidis | Enteritidis | 1425  | 1955 |
| SAL_FA3987AA | 174784      | SRR3284685 | 2015 | 10 | Europe        | United Kingdom | Enteritidis | Enteritidis | 3888  | 1953 |
| SAL_FA3988AA | 184480      | SRR3284684 | 2015 | 11 | Europe        | United Kingdom | Enteritidis | Enteritidis | 1425  | 1952 |
| SAL_FA3989AA | 146181      | SRR3284683 | 2015 | 8  | Europe        | United Kingdom | Enteritidis | Enteritidis | 1425  | 1951 |
| SAL_FA3992AA | 107130      | SRR3284680 | 2015 | 4  | Europe        | United Kingdom | Enteritidis | Enteritidis | 1425  | 1948 |
| SAL_FA3993AA | 152404      | SRR3284679 | 2015 | 8  | Europe        | United Kingdom | Enteritidis | Enteritidis | 1425  | 1947 |
| SAL_FA4003AA | E2016003857 | SRR3316428 | 2016 | 3  | North America | United States  | Enteritidis | Enteritidis | 1425  | 1938 |
| SAL_FA4004AA | E2016003759 | SRR3316427 | 2016 | 3  | North America | United States  | Enteritidis | Enteritidis | 1425  | 1938 |
| SAL_FA4063AA | 207512      | SRR3323060 | 2016 | 1  | Europe        | United Kingdom | Enteritidis | Enteritidis | 1425  | 1887 |
| SAL_FA4108AA | 21807       | SRR3323014 | 2014 | 6  | 8 Europe      | United Kingdom | Enteritidis | Enteritidis | 3888  | 674  |
| SAL_FA4116AA | 176329      | SRR3323006 | 2015 | 10 | Europe        | United Kingdom | Enteritidis | Enteritidis | 1425  | 1842 |
| SAL_FA4152AA | 126064      | SRR3322938 | 2015 | 6  | Europe        | United Kingdom | Enteritidis | Enteritidis | 1425  | 1808 |
| SAL_FA4170AA | 132048      | SRR3322733 | 2015 | 7  | Europe        | United Kingdom | Enteritidis | Enteritidis | 3888  | 1791 |
| SAL_FA4249AA | 170402      | SRR3322652 | 2015 | 9  | Europe        | United Kingdom | Enteritidis | Enteritidis | 3888  | 1717 |
| SAL_FA4280AA | 197002      | SRR3322619 | 2015 | 12 | Europe        | United Kingdom | Enteritidis | Enteritidis | 1425  | 295  |
| SAL_FA4296AA | 185896      | SRR3322538 | 2015 | 11 | Europe        | United Kingdom | Enteritidis | Enteritidis | 1425  | 1676 |
| SAL_FA4301AA | 128156      | SRR3322421 | 2015 | 6  | Europe        | United Kingdom | Enteritidis | Enteritidis | 27796 | 1671 |
| SAL_FA4303AA | 160820      | SRR3322419 | 2015 | 9  | Europe        | United Kingdom | Enteritidis | Enteritidis | 1425  | 1669 |
| SAL_FA4327AA | 137149      | SRR3322393 | 2015 | 7  | Europe        | United Kingdom | Enteritidis | Enteritidis | 1425  | 1648 |
| SAL_FA4338AA | 164957      | SRR3322381 | 2015 | 9  | Europe        | United Kingdom | Enteritidis | Enteritidis | 1425  | 1637 |
| SAL_FA4344AA | 127426      | SRR3322375 | 2015 | 6  | Europe        | United Kingdom | Enteritidis | Enteritidis | 3888  | 1632 |
| SAL_FA4428AA | 109887      | SRR3322199 | 2015 | 5  | Europe        | United Kingdom | Enteritidis | Enteritidis | 1425  | 1554 |
| SAL_FA4437AA | 189242      | SRR3322162 | 2015 | 11 | Europe        | United Kingdom | Enteritidis | Enteritidis | 1425  | 1546 |
| SAL_FA4438AA | 166319      | SRR3322161 | 2015 | 9  | Europe        | United Kingdom | Enteritidis | Enteritidis | 3888  | 1545 |
| SAL_FA4489AA | 182004      | SRR3322107 | 2015 | 10 | Europe        | United Kingdom | Enteritidis | Enteritidis | 1425  | 1498 |
| SAL_FA4524AA | 176343      | SRR3322070 | 2015 | 10 | Europe        | United Kingdom | Enteritidis | Enteritidis | -1926 | 1466 |
| SAL_FA4542AA | 140585      | SRR3322032 | 2015 | 7  | Europe        | United Kingdom | Enteritidis | Enteritidis | 1425  | 1449 |
| SAL_FA4558AA | 134020      | SRR3322014 | 2015 | 7  | Europe        | United Kingdom | Enteritidis | Enteritidis | 1425  | 1434 |
| SAL_FA4571AA | 126088      | SRR3321904 | 2015 | 6  | Europe        | United Kingdom | Enteritidis | Enteritidis | 1425  | 1422 |
| SAL_FA4585AA | 176352      | SRR3321890 | 2015 | 10 | Europe        | United Kingdom | Enteritidis | Enteritidis | 1425  | 1408 |
| SAL_FA4598AA | 118881      | SRR3321876 | 2015 | 5  | Europe        | United Kingdom | Enteritidis | Enteritidis | 1425  | 1396 |
| SAL_FA4638AA | 133215      | SRR3321836 | 2015 | 7  | Europe        | United Kingdom | Enteritidis | Enteritidis | 1425  | 1358 |
| SAL_FA4648AA | 140221      | SRR3321814 | 2015 | 7  | Europe        | United Kingdom | Enteritidis | Enteritidis | 1425  | 1348 |

|              |               |                |      |    |               |                |                         |             |       |      |
|--------------|---------------|----------------|------|----|---------------|----------------|-------------------------|-------------|-------|------|
| SAL_FA4728AA | 154871        | SRR3319072     | 2015 | 9  | Europe        | United Kingdom | Enteritidis             | Enteritidis | 1425  | 1280 |
| SAL_FA4729AA | 154875        | SRR3319071     | 2015 | 9  | Europe        | United Kingdom | Enteritidis             | Enteritidis | 1425  | 1279 |
| SAL_FA4731AA | 113500        | SRR3319069     | 2015 | 5  | Europe        | United Kingdom | Enteritidis             | Enteritidis | 1425  | 1277 |
| SAL_FA4732AA | 149234        | SRR3319068     | 2015 | 8  | Europe        | United Kingdom | Enteritidis             | Enteritidis | 1425  | 1276 |
| SAL_FA4733AA | 137144        | SRR3319067     | 2015 | 7  | Europe        | United Kingdom | Enteritidis             | Enteritidis | 1425  | 1275 |
| SAL_FA4734AA | 109929        | SRR3319066     | 2015 | 5  | Europe        | United Kingdom | Enteritidis             | Enteritidis | 1425  | 1274 |
| SAL_FA4735AA | 174697        | SRR3319065     | 2015 | 10 | Europe        | United Kingdom | Enteritidis             | Enteritidis | 1425  | 1265 |
| SAL_FA4738AA | 155656        | SRR3319062     | 2015 | 9  | Europe        | United Kingdom | Enteritidis             | Enteritidis | 1425  | 1271 |
| SAL_FA4739AA | 155653        | SRR3319061     | 2015 | 9  | Europe        | United Kingdom | Enteritidis             | Enteritidis | 1425  | 1270 |
| SAL_FA4740AA | 155650        | SRR3319060     | 2015 | 9  | Europe        | United Kingdom | Enteritidis             | Enteritidis | 1425  | 1269 |
| SAL_FA4741AA | 155659        | SRR3319059     | 2015 | 9  | Europe        | United Kingdom | Enteritidis             | Enteritidis | 1425  | 1268 |
| SAL_FA4742AA | 164954        | SRR3319058     | 2015 | 9  | Europe        | United Kingdom | Enteritidis             | Enteritidis | 1425  | 1267 |
| SAL_FA4743AA | 135161        | SRR3319057     | 2015 | 7  | Europe        | United Kingdom | Enteritidis             | Enteritidis | 1425  | 1266 |
| SAL_FA4744AA | 155705        | SRR3319056     | 2015 | 8  | Europe        | United Kingdom | Enteritidis             | Enteritidis | 1425  | 1265 |
| SAL_FA4745AA | 155649        | SRR3319055     | 2015 | 9  | Europe        | United Kingdom | Enteritidis             | Enteritidis | 1425  | 1264 |
| SAL_FA4808AA | CVM-N27379    | SRR3330244     | 2010 |    | North America | United States  | Enteritidis             | Enteritidis | 1425  | 1205 |
| SAL_FA4812AA | I2016004507-1 | SRR3330240     | 2016 | 3  | North America | United States  | Enteritidis             | Enteritidis | 1425  | 1201 |
| SAL_FA4813AA | I2016004374-4 | SRR3330239     | 2016 | 3  | North America | United States  | Enteritidis             | Enteritidis | 1425  | 1200 |
| SAL_FA4814AA | I2016004355   | SRR3372231     | 2016 | 3  | North America | United States  | Enteritidis             | Enteritidis | 1425  | 1199 |
| SAL_FA4815AA | E2016004634   | SRR3330237     | 2016 | 3  | North America | United States  | Enteritidis             | Enteritidis | 1425  | 1198 |
| SAL_FA4816AA | E2016004542   | SRR3330236     | 2016 | 3  | North America | United States  | Enteritidis             | Enteritidis | 1425  | 240  |
| SAL_FA4817AA | E2016004291   | SRR3330232     | 2016 | 3  | North America | United States  | Enteritidis             | Enteritidis | 1425  | 1197 |
| SAL_FA4819AA | CVM-N19817    | SRR3330228     | 2008 |    | North America | United States  | Enteritidis             | Enteritidis | 1425  | 1195 |
| SAL_FA4840AA | CVM-N27385    | SRR3330248     | 2010 |    | North America | United States  | Enteritidis             | Enteritidis | 1425  | 1174 |
| SAL_FA4841AA | CVM-N27382    | SRR3330247     | 2010 |    | North America | United States  | Enteritidis             | Enteritidis | 1425  | 1173 |
| SAL_FA4842AA | CVM-N27381    | SRR3330246     | 2010 |    | North America | United States  | Enteritidis             | Enteritidis | 1425  | 1172 |
| SAL_FA4843AA | E2016004541   | SRR3330235     | 2016 | 3  | North America | United States  | Enteritidis             | Enteritidis | 1425  | 1171 |
| SAL_FA4844AA | E2016004518   | SRR3330234     | 2016 | 3  | North America | United States  | Enteritidis             | Enteritidis | 1425  | 1170 |
| SAL_FA4845AA | E2016004517   | SRR3330233     | 2016 | 3  | North America | United States  | Enteritidis             | Enteritidis | 1425  | 1170 |
| SAL_FA4847AA | CVM-N19819    | SRR3330229     | 2008 |    | North America | United States  | Enteritidis             | Enteritidis | 1425  | 1168 |
| SAL_FA4982AA | MS150181      | traces-OCZhrSa | 2015 |    | Europe        | Ireland        | Enteritidis             | Enteritidis | 1425  | 1066 |
| SAL_FA4992AA | CFSAN035132   | SRR3394620     | 2012 |    | South America | Chile          | Enteritidis             | Enteritidis | 1425  | 1057 |
| SAL_FA4993AA | PNUSA5001812  | SRR3393569     | 2016 | 3  | North America | United States  | Enteritidis             | Enteritidis | 1425  | 1056 |
| SAL_FA4994AA | CFSAN035130   | SRR3393568     | 2012 |    | South America | Chile          | Enteritidis             | Enteritidis | 1425  | 1055 |
| SAL_FA4995AA | CFSAN035129   | SRR3393567     | 2012 |    | South America | Chile          | Enteritidis             | Enteritidis | 35328 | 1054 |
| SAL_FA5003AA | PNUSA5001826  | SRR3392876     |      |    | North America | United States  | Enteritidis (Predicted) | Enteritidis | 1425  | 1026 |
| SAL_FA5004AA | CFSAN035124   | SRR3394941     | 2011 |    | South America | Chile          | Enteritidis             | Enteritidis | 1425  | 1047 |
| SAL_FA5005AA | CFSAN035123   | SRR3394940     | 2012 |    | South America | Chile          | Enteritidis             | Enteritidis | 27775 | 767  |
| SAL_FA5006AA | CFSAN035122   | SRR3394939     | 2011 |    | South America | Chile          | Enteritidis             | Enteritidis | 1425  | 1046 |
| SAL_FA5007AA | CFSAN035121   | SRR3394938     | 2010 |    | South America | Chile          | Enteritidis             | Enteritidis | 1425  | 1045 |
| SAL_FA5008AA | CFSAN035120   | SRR3394937     | 2010 |    | South America | Chile          | Enteritidis             | Enteritidis | 1425  | 1044 |
| SAL_FA5009AA | CFSAN035119   | SRR3394936     | 2010 |    | South America | Chile          | Enteritidis             | Enteritidis | 1425  | 1043 |
| SAL_FA5010AA | CFSAN035118   | SRR3394935     | 2010 |    | South America | Chile          | Enteritidis             | Enteritidis | 1425  | 1042 |
| SAL_FA5011AA | CFSAN035117   | SRR3394934     | 2010 |    | South America | Chile          | Enteritidis             | Enteritidis | 27775 | 1041 |
| SAL_FA5012AA | CFSAN035116   | SRR3394933     | 2008 |    | South America | Chile          | Enteritidis             | Enteritidis | 1425  | 1040 |
| SAL_FA5013AA | CFSAN035115   | SRR3394932     | 2008 |    | South America | Chile          | Enteritidis             | Enteritidis | 1425  | 1039 |
| SAL_FA5014AA | CFSAN035114   | SRR3394931     | 2008 |    | South America | Chile          | Enteritidis             | Enteritidis | 1425  | 1038 |
| SAL_FA5015AA | CFSAN035113   | SRR3392831     | 2008 |    | South America | Chile          | Enteritidis             | Enteritidis | 1425  | 1037 |
| SAL_FA5016AA | CFSAN035112   | SRR3392830     | 2009 |    | South America | Chile          | Enteritidis             | Enteritidis | 1425  | 1036 |
| SAL_FA5017AA | CFSAN035111   | SRR3392829     | 2009 |    | South America | Chile          | Enteritidis             | Enteritidis | 1425  | 1035 |
| SAL_FA5018AA | CFSAN035110   | SRR3392828     | 2009 |    | South America | Chile          | Enteritidis             | Enteritidis | 1425  | 1035 |
| SAL_FA5019AA | CFSAN035109   | SRR3392826     | 2009 |    | South America | Chile          | Enteritidis             | Enteritidis | 1425  | 1034 |
| SAL_FA5020AA | CFSAN035108   | SRR3392825     | 2009 |    | South America | Chile          | Enteritidis             | Enteritidis | 1425  | 1033 |
| SAL_FA5021AA | CFSAN035107   | SRR3392824     | 2009 |    | South America | Chile          | Enteritidis             | Enteritidis | 1425  | 1032 |
| SAL_FA5024AA | PNUSA5001770  | SRR3392815     | 2016 | 3  | North America | United States  | Enteritidis             | Enteritidis | 1425  | 1029 |
| SAL_FA5027AA | PNUSA5001827  | SRR3392812     | 2015 | 11 | North America | United States  | Enteritidis             | Enteritidis | 1425  | 1026 |
| SAL_FA5037AA | PNUSA5001769  | SRR3392802     |      |    | North America | United States  | Enteritidis (Predicted) | Enteritidis | 1425  | 1018 |
| SAL_FA5038AA | PNUSA5001768  | SRR3392801     |      |    | North America | United States  | Enteritidis (Predicted) | Enteritidis | 1425  | 1017 |
| SAL_FA5044AA | 2016K-0210    | SRR3392791     |      |    | North America | United States  | Enteritidis (Predicted) | Enteritidis | 1425  | 1011 |

|              |               |                |      |    |               |                |                         |             |       |     |
|--------------|---------------|----------------|------|----|---------------|----------------|-------------------------|-------------|-------|-----|
| SAL_FA5113AA | CFSAN048656   | SRR3391920     | 2016 | 4  | North America | United States  | Enteritidis (Predicted) | Enteritidis | 1425  | 956 |
| SAL_FA5114AA | CFSAN048655   | SRR3391919     | 2016 | 4  | North America | United States  | Enteritidis (Predicted) | Enteritidis | 1425  | 955 |
| SAL_FA5147AA | FSIS1606217   | SRR3383972     | 2016 |    | North America | United States  | Enteritidis             | Enteritidis | 1425  | 915 |
| SAL_FA5153AA | FSIS1606216   | SRR3383893     | 2016 |    | North America | United States  | Enteritidis             | Enteritidis | 1425  | 915 |
| SAL_FA5154AA | FSIS1606214   | SRR3383892     | 2016 |    | North America | United States  | Enteritidis             | Enteritidis | 1425  | 915 |
| SAL_FA5160AA | FDA00003979   | SRR3383906     | 2012 | 1  | Asia          | India          | I 8:-:1,5               | Enteritidis | 7942  | 922 |
| SAL_FA5162AA | I2016004602   | SRR3465450     | 2016 | 3  | North America | United States  | Enteritidis             | Enteritidis | 1425  | 920 |
| SAL_FA5163AA | I2016004601   | SRR3457736     | 2016 | 3  | North America | United States  | Enteritidis             | Enteritidis | 1425  | 919 |
| SAL_FA5164AA | I2016003741   | SRR3383901     | 2016 | 3  | North America | United States  | Enteritidis             | Enteritidis | 1425  | 918 |
| SAL_FA5167AA | FSIS1606215   | SRR3383819     | 2016 |    | North America | United States  | Enteritidis             | Enteritidis | 1425  | 915 |
| SAL_FA5177AA | FDA00003903   | SRR3379326     | 2011 | 7  | North America | United States  | Enteritidis             | Enteritidis | 1425  | 906 |
| SAL_FA5178AA | FDA00003906   | SRR3379325     | 2012 | 5  | North America | United States  | Enteritidis             | Enteritidis | 1425  | 905 |
| SAL_FA5179AA | FDA00003907   | SRR3379324     | 2012 | 5  | North America | United States  | Enteritidis             | Enteritidis | 1425  | 905 |
| SAL_FA5180AA | FDA00003908   | SRR3379323     | 2012 | 5  | North America | United States  | Enteritidis             | Enteritidis | 1425  | 904 |
| SAL_FA5181AA | FDA00003909   | SRR3379322     | 2012 | 5  | North America | United States  | Enteritidis             | Enteritidis | 1425  | 903 |
| SAL_FA5220AA | CFSAN047695   | SRR3372347     | 2015 | 11 | North America | United States  | Enteritidis (Predicted) | Enteritidis | 1425  | 867 |
| SAL_FA5254AA | CFSAN048431   | SRR3372313     | 2016 | 3  | North America | United States  | Enteritidis             | Enteritidis | 1425  | 841 |
| SAL_FA5318AA | I2016004512-1 | SRR3372232     | 2016 | 3  | North America | United States  | Enteritidis             | Enteritidis | 1425  | 789 |
| SAL_FA5319AA | E2016005001   | SRR3372230     | 2016 | 3  | North America | United States  | Enteritidis             | Enteritidis | 1425  | 788 |
| SAL_FA5320AA | E2016004853   | SRR3372229     | 2016 | 3  | North America | United States  | Enteritidis             | Enteritidis | 1425  | 787 |
| SAL_FA5321AA | E2016004845   | SRR3372228     | 2016 | 3  | North America | United States  | Enteritidis             | Enteritidis | 34197 | 786 |
| SAL_FA5322AA | E2016004805   | SRR3372227     | 2016 | 3  | North America | United States  | Enteritidis             | Enteritidis | 1425  | 785 |
| SAL_FA5323AA | E2016004789   | SRR3372226     | 2016 | 3  | North America | United States  | Enteritidis             | Enteritidis | 1425  | 784 |
| SAL_FA5324AA | E2016004753   | SRR3372225     | 2016 | 3  | North America | United States  | Enteritidis             | Enteritidis | 1425  | 783 |
| SAL_FA5325AA | E2016004642   | SRR3372224     | 2016 | 3  | North America | United States  | Enteritidis             | Enteritidis | 1425  | 617 |
| SAL_FA5328AA | CFSAN035149   | SRR3394980     | 2012 |    | South America | Chile          | Enteritidis             | Enteritidis | 1425  | 780 |
| SAL_FA5329AA | CFSAN035148   | SRR3394967     | 2012 |    | South America | Chile          | Enteritidis             | Enteritidis | 1425  | 780 |
| SAL_FA5330AA | CFSAN035147   | SRR3394966     | 2012 |    | South America | Chile          | Enteritidis             | Enteritidis | 1425  | 780 |
| SAL_FA5338AA | CFSAN035157   | SRR3394958     | 2013 |    | South America | Chile          | Enteritidis             | Enteritidis | 1425  | 772 |
| SAL_FA5342AA | CFSAN035153   | SRR3394954     | 2013 |    | South America | Chile          | Enteritidis             | Enteritidis | 1425  | 768 |
| SAL_FA5343AA | CFSAN035152   | SRR3394953     | 2013 |    | South America | Chile          | Enteritidis             | Enteritidis | 1425  | 768 |
| SAL_FA5344AA | CFSAN035151   | SRR3394952     | 2013 |    | South America | Chile          | Enteritidis             | Enteritidis | 27775 | 767 |
| SAL_FA5345AA | CFSAN035150   | SRR3394951     | 2012 |    | South America | Chile          | Enteritidis             | Enteritidis | 27775 | 766 |
| SAL_FA5348AA | CFSAN035134   | SRR3394948     | 2012 |    | South America | Chile          | Enteritidis             | Enteritidis | 1425  | 763 |
| SAL_FA5349AA | CFSAN035133   | SRR3394947     | 2012 |    | South America | Chile          | Enteritidis             | Enteritidis | 1425  | 762 |
| SAL_FA5350AA | CFSAN035131   | SRR3394946     | 2012 |    | South America | Chile          | Enteritidis             | Enteritidis | 1425  | 761 |
| SAL_FA5351AA | CFSAN035128   | SRR3394945     | 2012 |    | South America | Chile          | Enteritidis             | Enteritidis | 1425  | 760 |
| SAL_FA5352AA | CFSAN035127   | SRR3394944     | 2012 |    | South America | Chile          | Enteritidis             | Enteritidis | 1425  | 759 |
| SAL_FA5353AA | CFSAN035126   | SRR3394943     | 2011 |    | South America | Chile          | Enteritidis             | Enteritidis | 1425  | 758 |
| SAL_FA5354AA | CFSAN035125   | SRR3394942     | 2011 |    | South America | Chile          | Enteritidis             | Enteritidis | 1425  | 757 |
| SAL_FA5367AA | 028V9         | traces-OZYCBaz |      |    | Africa        | Malawi         | Enteritidis (Predicted) | Enteritidis | 1425  | 747 |
| SAL_FA5405AA | 2016K-0215    | SRR3405708     |      |    | North America | United States  | Enteritidis (Predicted) | Enteritidis | 1425  | 718 |
| SAL_FA5406AA | 2016K-0216    | SRR3405707     | 2016 | 2  | North America | United States  | Enteritidis (Predicted) | Enteritidis | 1425  | 717 |
| SAL_FA5432AA | FSIS1606187   | SRR3402072     | 2016 |    | North America | United States  | Enteritidis             | Enteritidis | 1425  | 693 |
| SAL_FA5451AA | 21809         | SRR3401403     | 2014 | 6  | 8 Europe      | United Kingdom | Enteritidis             | Enteritidis | 3888  | 674 |
| SAL_FA5473AA | I2016005133   | SRR3400300     | 2016 | 4  | North America | United States  | Enteritidis             | Enteritidis | 1425  | 656 |
| SAL_FA5474AA | I2016005110   | SRR3400299     | 2016 | 4  | North America | United States  | Enteritidis             | Enteritidis | 1425  | 655 |
| SAL_FA5475AA | I2016005047   | SRR3400298     | 2016 | 4  | North America | United States  | Enteritidis             | Enteritidis | 1425  | 654 |
| SAL_FA5476AA | I2016005045   | SRR3400297     | 2016 | 4  | North America | United States  | Enteritidis             | Enteritidis | 1425  | 653 |
| SAL_FA5477AA | I2016005030   | SRR3400296     | 2016 | 4  | North America | United States  | Enteritidis             | Enteritidis | 1425  | 652 |
| SAL_FA5478AA | E2016005293   | SRR3400295     | 2016 | 4  | North America | United States  | Enteritidis             | Enteritidis | 1425  | 651 |
| SAL_FA5479AA | E2016005274   | SRR3400294     | 2016 | 4  | North America | United States  | Enteritidis             | Enteritidis | 1425  | 650 |
| SAL_FA5480AA | E2016005190   | SRR3400293     | 2016 | 4  | North America | United States  | Enteritidis             | Enteritidis | 1425  | 649 |
| SAL_FA5481AA | E2016005076   | SRR3400292     | 2016 | 4  | North America | United States  | Enteritidis             | Enteritidis | 1425  | 648 |
| SAL_FA5482AA | E2016005028   | SRR3400291     | 2016 | 3  | North America | United States  | Enteritidis             | Enteritidis | 1425  | 647 |
| SAL_FA5498AA | E2016005025   | SRR3400015     | 2016 | 4  | North America | United States  | Enteritidis             | Enteritidis | 1425  | 240 |
| SAL_FA5508AA | CVM-N19847    | SRR3399993     | 2008 |    | North America | United States  | Enteritidis             | Enteritidis | 1425  | 622 |
| SAL_FA5511AA | PNUSA5001887  | SRR3399512     | 2016 | 3  | North America | United States  | Enteritidis             | Enteritidis | 26775 | 619 |
| SAL_FA5513AA | PNUSA5001903  | SRR3405952     | 2016 | 3  | North America | United States  | Enteritidis             | Enteritidis | 1425  | 617 |

|              |              |                |      |   |               |               |                         |             |       |     |
|--------------|--------------|----------------|------|---|---------------|---------------|-------------------------|-------------|-------|-----|
| SAL_FA5514AA | PNUSAS001902 | SRR3405951     | 2016 | 3 | North America | United States | Enteritidis             | Enteritidis | 1425  | 616 |
| SAL_FA5515AA | PNUSAS001901 | SRR3405950     | 2016 | 3 | North America | United States | Enteritidis             | Enteritidis | 1425  | 615 |
| SAL_FA5516AA | PNUSAS001900 | SRR3405949     |      |   | North America | United States | Enteritidis (Predicted) | Enteritidis | 1425  | 614 |
| SAL_FA5517AA | PNUSAS001899 | SRR3405948     | 2016 | 3 | North America | United States | Enteritidis             | Enteritidis | 1425  | 613 |
| SAL_FA5538AA | PNUSAS001883 | SRR3405867     | 2016 | 3 | North America | United States | Enteritidis             | Enteritidis | 1425  | 595 |
| SAL_FA5539AA | PNUSAS001947 | SRR3405866     | 2016 | 3 | North America | United States | Enteritidis             | Enteritidis | 1425  | 594 |
| SAL_FA5543AA | PNUSAS001951 | SRR3405858     |      |   | North America | United States | Enteritidis (Predicted) | Enteritidis | 1425  | 180 |
| SAL_FA5547AA | PNUSAS001882 | SRR3405766     | 2016 | 3 | North America | United States | Enteritidis             | Enteritidis | 1425  | 589 |
| SAL_FA5548AA | PNUSAS001881 | SRR3405765     | 2016 | 3 | North America | United States | Enteritidis             | Enteritidis | 1425  | 588 |
| SAL_FA5551AA | PNUSAS001878 | SRR3405762     | 2016 | 3 | North America | United States | Enteritidis             | Enteritidis | 1425  | 585 |
| SAL_FA5552AA | PNUSAS001877 | SRR3405761     | 2016 | 3 | North America | United States | Enteritidis             | Enteritidis | 1425  | 584 |
| SAL_FA5557AA | PNUSAS001875 | SRR3405754     | 2016 | 2 | North America | United States | Enteritidis             | Enteritidis | 1425  | 580 |
| SAL_FA5589AA | 6388         | SRR3410216     | 2014 |   | Europe        | Germany       | Enteritidis             | Enteritidis | 3888  | 552 |
| SAL_FA5590AA | 6175         | SRR3410215     | 2014 |   | Europe        | Germany       | Enteritidis             | Enteritidis | 3888  | 551 |
| SAL_FA5591AA | 6012         | SRR3410214     | 2014 |   | Europe        | Germany       | Enteritidis             | Enteritidis | 3888  | 551 |
| SAL_FA5592AA | 5946         | SRR3410213     | 2014 |   | Europe        | Germany       | Enteritidis             | Enteritidis | 3888  | 550 |
| SAL_FA5593AA | 5795         | SRR3410212     | 2014 |   | Europe        | Germany       | Enteritidis             | Enteritidis | 3888  | 549 |
| SAL_FA5594AA | 5227         | SRR3410211     | 2014 |   | Europe        | Germany       | Enteritidis             | Enteritidis | 3888  | 548 |
| SAL_FA5595AA | 5226         | SRR3410210     | 2014 |   | Europe        | Germany       | Enteritidis             | Enteritidis | 3888  | 547 |
| SAL_FA5596AA | 5225         | SRR3410209     | 2014 |   | Europe        | Germany       | Enteritidis             | Enteritidis | 3888  | 546 |
| SAL_FA5597AA | 5224         | SRR3410208     | 2014 |   | Europe        | Germany       | Enteritidis             | Enteritidis | 3888  | 545 |
| SAL_FA5619AA | 54059        | SRR3417508     | 2014 |   | Europe        | Germany       | Enteritidis             | Enteritidis | 3888  | 526 |
| SAL_FA5620AA | 54053        | SRR3417507     | 2014 |   | Europe        | Germany       | Enteritidis             | Enteritidis | 3888  | 525 |
| SAL_FA5621AA | 54047        | SRR3417506     | 2014 |   | Europe        | Germany       | Enteritidis             | Enteritidis | 3888  | 524 |
| SAL_FA5622AA | 54038        | SRR3417505     | 2014 |   | Europe        | Germany       | Enteritidis             | Enteritidis | 3888  | 523 |
| SAL_FA5623AA | 54014        | SRR3417504     | 2014 |   | Europe        | Germany       | Enteritidis             | Enteritidis | 3888  | 522 |
| SAL_FA5624AA | 54008        | SRR3417503     | 2014 |   | Europe        | Germany       | Enteritidis             | Enteritidis | 3888  | 521 |
| SAL_FA5625AA | 53996        | SRR3417502     | 2014 |   | Europe        | Germany       | Enteritidis             | Enteritidis | 3888  | 520 |
| SAL_FA5626AA | 53973        | SRR3417501     | 2014 |   | Europe        | Germany       | Enteritidis             | Enteritidis | 3888  | 519 |
| SAL_FA5627AA | 50104        | SRR3417500     | 2014 |   | Europe        | Austria       | Enteritidis             | Enteritidis | 3888  | 518 |
| SAL_FA5628AA | 49693        | SRR3417499     | 2014 |   | Europe        | Austria       | Enteritidis             | Enteritidis | 3888  | 517 |
| SAL_FA5629AA | 49692        | SRR3417498     | 2014 |   | Europe        | Austria       | Enteritidis             | Enteritidis | 3888  | 516 |
| SAL_FA5630AA | 49691        | SRR3417497     | 2014 |   | Europe        | Austria       | Enteritidis             | Enteritidis | 3888  | 515 |
| SAL_FA5631AA | 45605        | SRR3417496     | 2014 |   | Europe        | Luxembourg    | Enteritidis             | Enteritidis | 3888  | 514 |
| SAL_FA5633AA | 37046        | SRR3417494     | 2014 |   | Europe        | Austria       | Enteritidis             | Enteritidis | 3888  | 512 |
| SAL_FA5634AA | 37045        | SRR3417493     | 2014 |   | Europe        | Austria       | Enteritidis             | Enteritidis | 3888  | 511 |
| SAL_FA5660AA | MS150184     | traces-0ELniWa | 2015 |   | Europe        | Ireland       | Enteritidis             | Enteritidis | 1425  | 503 |
| SAL_FA5661AA | MS150182     | traces-0xeNbNg | 2015 |   | Europe        | Ireland       | Enteritidis             | Enteritidis | 1425  | 503 |
| SAL_FA5662AA | MS150185     | traces-0zuhqHu | 2015 |   | Europe        | Ireland       | Enteritidis             | Enteritidis | 1425  | 502 |
| SAL_FA5664AA | MS150094     | traces-0hdCvCl | 2015 |   | Europe        | Ireland       | Enteritidis             | Enteritidis | 26465 | 500 |
| SAL_FA5666AA | MS150056     | traces-0Xplpow | 2015 |   | Europe        | Ireland       | Enteritidis             | Enteritidis | 1425  | 498 |
| SAL_FA5670AA | 15066-2014   | traces-0DiqlLV |      |   | Europe        | Slovenia      | Enteritidis             | Enteritidis | 3941  | 494 |
| SAL_FA5671AA | 15070-2014   | traces-0PthVOe |      |   | Europe        | Slovenia      | Enteritidis             | Enteritidis | 3941  | 493 |
| SAL_FA5724AA | E2016005372  | SRR3437476     | 2016 | 4 | North America | United States | Enteritidis             | Enteritidis | 1425  | 447 |
| SAL_FA5725AA | E2016005325  | SRR3437475     | 2016 | 4 | North America | United States | Enteritidis             | Enteritidis | 1425  | 446 |
| SAL_FA5738AA | MS150004     | traces-0cOlCST | 2015 |   | Europe        | Ireland       | Enteritidis             | Enteritidis | 3888  | 404 |
| SAL_FA5755AA | NSW059       | traces-0fCRfwj | 2016 |   | Oceania       | Australia     | Enteritidis             | Enteritidis | 1425  | 418 |
| SAL_FA5756AA | NSW061       | traces-0nmudVP | 2016 | 4 | 27 Oceania    | Australia     | Enteritidis             | Enteritidis | 1425  | 417 |
| SAL_FA5758AA | MS150020     | traces-0MPIWcY | 2015 |   | Europe        | Ireland       | Enteritidis             | Enteritidis | 1425  | 415 |
| SAL_FA5760AA | MS150016     | traces-0UuqSLb | 2015 |   | Europe        | Ireland       | Enteritidis             | Enteritidis | 1425  | 413 |
| SAL_FA5761AA | MS150050     | traces-0VypkXB | 2015 |   | Europe        | Ireland       | Enteritidis             | Enteritidis | 1425  | 412 |
| SAL_FA5763AA | MS150021     | traces-0DnzsFD | 2015 |   | Europe        | Ireland       | Enteritidis             | Enteritidis | 3888  | 410 |
| SAL_FA5767AA | MS150186     | traces-0pEmkiB | 2015 |   | Europe        | Ireland       | Enteritidis             | Enteritidis | 1425  | 303 |
| SAL_FA5771AA | MS150071     | traces-0aWEscj | 2015 |   | Europe        | Ireland       | Enteritidis             | Enteritidis | 3888  | 404 |
| SAL_FA5773AA | 117968       | ERR1370587     |      |   |               |               | Enteritidis (Predicted) | Enteritidis | 1425  | 402 |
| SAL_FA5774AA | 117967       | ERR1370586     |      |   |               |               | Enteritidis (Predicted) | Enteritidis | 1425  | 402 |
| SAL_FA5775AA | 117961       | ERR1370585     |      |   |               |               | Enteritidis (Predicted) | Enteritidis | 1425  | 402 |
| SAL_FA5776AA | 117960       | ERR1370584     |      |   |               |               | Enteritidis (Predicted) | Enteritidis | 1425  | 402 |
| SAL_FA5777AA | 117927       | ERR1370583     |      |   |               |               | Enteritidis (Predicted) | Enteritidis | 1425  | 402 |

|              |               |                |      |    |    |               |                |                         |             |       |       |
|--------------|---------------|----------------|------|----|----|---------------|----------------|-------------------------|-------------|-------|-------|
| SAL_FA5782AA | MS150109      | traces-0lMdNxM | 2015 |    |    | Europe        | Ireland        | Enteritidis             | Enteritidis | 1425  | 397   |
| SAL_FA5808AA | NSW070        | traces-0KVJwHZ | 2016 | 4  | 27 | Oceania       | Australia      | Enteritidis             | Enteritidis | 28412 | 374   |
| SAL_FA5817AA | E2016005458   | SRR3457764     | 2016 | 4  |    | North America | United States  | Enteritidis             | Enteritidis | 1425  | 366   |
| SAL_FA5818AA | E2016005476   | SRR3457765     | 2016 | 4  |    | North America | United States  | Enteritidis             | Enteritidis | 1425  | 240   |
| SAL_FA5819AA | AK1131900080  | SRR3457709     | 2011 | 11 |    | North America | United States  | Enteritidis             | Enteritidis | 1425  | 365   |
| SAL_FA5823AA | FDAA0002756   | SRR3457704     | 2008 | 6  |    | South America | Peru           | Enteritidis             | Enteritidis | 1425  | 361   |
| SAL_FA5883AA | MS150236      | traces-0GLQRll | 2015 |    |    | Europe        | Ireland        | Enteritidis             | Enteritidis | 1425  | 304   |
| SAL_FA5884AA | MS150187      | traces-OrOMpGZ | 2015 |    |    | Europe        | Ireland        | Enteritidis             | Enteritidis | 1425  | 303   |
| SAL_FA5889AA | MS150278      | traces-0JpiPUf | 2015 |    |    | Europe        | Ireland        | Enteritidis             | Enteritidis | 1425  | 298   |
| SAL_FA5891AA | MS150266      | traces-0ZaCLPv | 2015 |    |    | Europe        | Ireland        | Enteritidis             | Enteritidis | 1425  | 296   |
| SAL_FA5892AA | MS150280      | traces-0NPcjPm | 2015 |    |    | Europe        | Ireland        | Enteritidis             | Enteritidis | 1425  | 295   |
| SAL_FA5893AA | MS150279      | traces-0hTdmYE | 2015 |    |    | Europe        | Ireland        | Enteritidis             | Enteritidis | 1425  | 294   |
| SAL_FA5897AA | MS150291      | traces-0QxDFS  | 2015 |    |    | Europe        | Ireland        | Enteritidis             | Enteritidis | 36954 | 292   |
| SAL_FA5957AA | E2016005692   | SRR3465485     | 2016 | 4  |    | North America | United States  | Enteritidis             | Enteritidis | 1425  | 241   |
| SAL_FA5958AA | E2016005675   | SRR3465470     | 2016 | 4  |    | North America | United States  | Enteritidis             | Enteritidis | 1425  | 240   |
| SAL_FA5959AA | E2016005628   | SRR3465460     | 2016 | 4  |    | North America | United States  | Enteritidis             | Enteritidis | 1425  | 239   |
| SAL_FA6023AA | PNUSA5002039  | SRR3475681     | 2016 | 4  |    | North America | United States  | Enteritidis             | Enteritidis | 1425  | 186   |
| SAL_FA6026AA | PNUSA5002027  | SRR3475678     |      |    |    | North America | United States  | Enteritidis (Predicted) | Enteritidis | 27863 | 184   |
| SAL_FA6028AA | PNUSA5002025  | SRR3475676     | 2016 | 3  |    | North America | United States  | Enteritidis             | Enteritidis | 1425  | 180   |
| SAL_FA6029AA | PNUSA5002024  | SRR3475675     |      |    |    | North America | United States  | Enteritidis (Predicted) | Enteritidis | 1425  | 182   |
| SAL_FA6031AA | PNUSA5002022  | SRR3475673     |      |    |    | North America | United States  | Enteritidis (Predicted) | Enteritidis | 1425  | 180   |
| SAL_FA6032AA | PNUSA5002021  | SRR3475671     |      |    |    | North America | United States  | Enteritidis (Predicted) | Enteritidis | 1425  | 179   |
| SAL_FA6034AA | PNUSA5002020  | SRR3475669     |      |    |    | North America | United States  | Enteritidis (Predicted) | Enteritidis | 37133 | 177   |
| SAL_FA6040AA | PNUSA5002095  | SRR3475663     |      |    |    | North America | United States  | Enteritidis (Predicted) | Enteritidis | 1425  | 171   |
| SAL_FA6042AA | PNUSA5001895  | SRR3475661     |      |    |    | North America | United States  | Enteritidis (Predicted) | Enteritidis | 1425  | 169   |
| SAL_FA6044AA | PNUSA5001893  | SRR3475659     |      |    |    | North America | United States  | Enteritidis (Predicted) | Enteritidis | 1425  | 167   |
| SAL_FA6045AA | PNUSA5001892  | SRR3475658     |      |    |    | North America | United States  | Enteritidis (Predicted) | Enteritidis | 1425  | 166   |
| SAL_FA6046AA | PNUSA5001891  | SRR3475657     |      |    |    | North America | United States  | Enteritidis (Predicted) | Enteritidis | 1425  | 165   |
| SAL_FA6048AA | PNUSA5001747  | SRR3475655     |      |    |    | North America | United States  | Enteritidis (Predicted) | Enteritidis | 1425  | 163   |
| SAL_FA6051AA | PNUSA5001742  | SRR3475652     |      |    |    | North America | United States  | Enteritidis (Predicted) | Enteritidis | 1425  | 160   |
| SAL_FA6060AA | PNUSA5001858  | SRR3475642     | 2016 | 2  |    | North America | United States  | Enteritidis             | Enteritidis | 1425  | 151   |
| SAL_FA6061AA | PNUSA5001857  | SRR3475639     | 2016 | 1  |    | North America | United States  | Enteritidis             | Enteritidis | 1425  | 150   |
| SAL_FA6100AA | PNUSA5001851  | SRR3473926     |      |    |    | North America | United States  | Enteritidis             | Enteritidis | 1425  | 112   |
| SAL_FA6126AA | PNUSA5002053  | SRR3473898     | 2016 | 3  |    | North America | United States  | Enteritidis             | Enteritidis | 1425  | 87    |
| SAL_FA6128AA | PNUSA5002051  | SRR3473896     | 2016 | 3  |    | North America | United States  | Enteritidis             | Enteritidis | 1425  | 85    |
| SAL_FA6130AA | PNUSA5001998  | SRR3473894     |      |    |    | North America | United States  | Enteritidis (Predicted) | Enteritidis | 1425  | 83    |
| SAL_FA6131AA | PNUSA5001997  | SRR3473893     |      |    |    | North America | United States  | Enteritidis (Predicted) | Enteritidis | 27901 | 82    |
| SAL_FA6187AA | FSIS1606338   | SRR3476370     | 2016 |    |    | North America | United States  | Enteritidis             | Enteritidis | 1425  | 27    |
| SAL_FA6202AA | FSIS1503700   | SRR3475939     | 2015 |    |    | North America | United States  | Enteritidis             | Enteritidis | 1425  | 12    |
| SAL_FA6227AA | CFSAN032104   | SRR3479657     | 2014 | 1  |    | North America | United States  | Enteritidis             | Enteritidis | 1425  | 18698 |
| SAL_FA6284AA | S/20160357    | traces-0uCJlea | 2016 | 4  | 6  | Europe        | United Kingdom | Enteritidis             | Enteritidis | 3888  | 39554 |
| SAL_FA6285AA | S/20160335    | traces-0oZNxMV | 2016 | 4  | 6  | Europe        | United Kingdom | Enteritidis             | Enteritidis | 3888  | 39556 |
| SAL_FA6286AA | S/20160309    | traces-0JytDoE | 2016 | 3  | 31 | Europe        | United Kingdom | Enteritidis             | Enteritidis | 3888  | 39556 |
| SAL_FA6287AA | S/20160344    | traces-0VuxFqF | 2016 | 4  | 7  | Europe        | United Kingdom | Enteritidis             | Enteritidis | 3888  | 39555 |
| SAL_FA6294AA | 2016K-0174    | SRR3489712     |      |    |    | North America | United States  | Enteritidis (Predicted) | Enteritidis | 1425  | 3680  |
| SAL_FA6363AA | CFSAN049417   | SRR3490045     | 2016 | 4  |    | North America | United States  | Enteritidis             | Enteritidis | 1425  | 39607 |
| SAL_FA6364AA | CFSAN049416   | SRR3490044     | 2016 | 4  |    | North America | United States  | Enteritidis             | Enteritidis | 1425  | 39606 |
| SAL_FA6365AA | CFSAN049415   | SRR3490043     | 2016 | 4  |    | North America | United States  | Enteritidis             | Enteritidis | 1425  | 39605 |
| SAL_FA6379AA | I2016005854   | SRR3490027     | 2016 | 4  |    | North America | United States  | Enteritidis             | Enteritidis | 1425  | 39582 |
| SAL_FA6380AA | I2016005745   | SRR3490026     | 2016 | 4  |    | North America | United States  | Enteritidis             | Enteritidis | 1425  | 39581 |
| SAL_FA6381AA | I2016005701-2 | SRR3490025     | 2016 | 4  |    | North America | United States  | Enteritidis             | Enteritidis | 3888  | 39580 |
| SAL_FA6382AA | E2016006266   | SRR3509910     | 2016 | 4  |    | North America | United States  | Enteritidis             | Enteritidis | 1425  | 39579 |
| SAL_FA6383AA | E2016005959   | SRR3490023     | 2016 | 4  |    | North America | United States  | Enteritidis             | Enteritidis | 1425  | 39578 |
| SAL_FA6384AA | E2016005950   | SRR3490022     | 2016 | 4  |    | North America | United States  | Enteritidis             | Enteritidis | 34197 | 39577 |
| SAL_FA6385AA | E2016005931   | SRR3490021     | 2016 | 4  |    | North America | United States  | Enteritidis             | Enteritidis | 1425  | 39576 |
| SAL_FA6386AA | E2016005845   | SRR3490020     | 2016 | 4  |    | North America | United States  | Enteritidis             | Enteritidis | 1425  | 39575 |
| SAL_FA6387AA | E2016005766   | SRR3490019     | 2016 | 4  |    | North America | United States  | Enteritidis             | Enteritidis | 1425  | 39574 |
| SAL_FA6388AA | E2016005761   | SRR3490018     | 2016 | 4  |    | North America | United States  | Enteritidis             | Enteritidis | 1425  | 39573 |
| SAL_FA6389AA | I2016005972   | SRR3490017     | 2016 | 4  |    | North America | United States  | Enteritidis             | Enteritidis | 3888  | 39588 |



|              |              |                 |      |   |               |               |                         |             |       |       |
|--------------|--------------|-----------------|------|---|---------------|---------------|-------------------------|-------------|-------|-------|
| SAL_FA6390AA | E2016006522  | SRR3490016      | 2016 | 4 | North America | United States | Enteritidis             | Enteritidis | 1425  | 39587 |
| SAL_FA6391AA | E2016006515  | SRR3490015      | 2016 | 4 | North America | United States | Enteritidis             | Enteritidis | 1425  | 39586 |
| SAL_FA6392AA | E2016006274  | SRR3490013      | 2016 | 4 | North America | United States | Enteritidis             | Enteritidis | 1425  | 39572 |
| SAL_FA6393AA | E2016006269  | SRR3490012      | 2016 | 4 | North America | United States | Enteritidis             | Enteritidis | 1425  | 447   |
| SAL_FA6415AA | PNUSAS001773 | SRR3495149      |      |   | North America | United States | Enteritidis (Predicted) | Enteritidis | 1425  | 39641 |
| SAL_FA6421AA | PNUSAS002115 | SRR3495143      | 2016 | 4 | North America | United States | Enteritidis             | Enteritidis | 1425  | 39635 |
| SAL_FA6422AA | PNUSAS002116 | SRR3495142      | 2016 | 4 | North America | United States | Enteritidis             | Enteritidis | 1425  | 39630 |
| SAL_FA6424AA | PNUSAS002118 | SRR3495139      | 2016 | 3 | North America | United States | Enteritidis             | Enteritidis | 37741 | 39633 |
| SAL_FA6425AA | PNUSAS002119 | SRR3495137      | 2016 | 4 | North America | United States | Enteritidis (Predicted) | Enteritidis | 1425  | 39629 |
| SAL_FA6446AA | NSW071       | traces-0abgYmm  | 2016 | 5 | 11 Oceania    | Australia     | Enteritidis             | Enteritidis | 1425  | 25840 |
| SAL_FA6447AA | NSW063       | traces-0cGhVTQ  | 2016 | 4 | 27 Oceania    | Australia     | Enteritidis             | Enteritidis | 1425  | 39701 |
| SAL_FA6448AA | NSW064       | traces-0ZyjWEu  | 2016 | 4 | 27 Oceania    | Australia     | Enteritidis             | Enteritidis | 1425  | 25840 |
| SAL_FA6450AA | NSW062       | traces-0XvcvFG  | 2016 | 4 | 27 Oceania    | Australia     | Enteritidis             | Enteritidis | 1425  | 39676 |
| SAL_FA6451AA | NSW072       | traces-0oiglcj  | 2016 | 5 | 11 Oceania    | Australia     | Enteritidis             | Enteritidis | 1425  | 39675 |
| SAL_FA6452AA | NSW069       | traces-0JcbehO  | 2016 | 4 | 27 Oceania    | Australia     | Enteritidis             | Enteritidis | 1425  | 39674 |
| SAL_FA6455AA | NSW073       | traces-0zGVDfj  | 2016 | 5 | 11 Oceania    | Australia     | Enteritidis             | Enteritidis | 1425  | 39699 |
| SAL_FA6456AA | NSW074       | traces-0RNdeEGM | 2016 | 5 | 11 Oceania    | Australia     | Enteritidis             | Enteritidis | 1425  | 39698 |
| SAL_FA6457AA | NSW075       | traces-0nSYPie  | 2016 | 5 | 11 Oceania    | Australia     | Enteritidis             | Enteritidis | 1425  | 39697 |
| SAL_FA6459AA | NSW077       | traces-0TuBmrg  | 2016 | 5 | 11 Oceania    | Australia     | Enteritidis             | Enteritidis | 1425  | 39674 |
| SAL_FA6517AA | NSW056       | traces-0ldrlxl  | 2015 |   | Oceania       | Australia     | Enteritidis             | Enteritidis | 1425  | 39775 |
| SAL_FA6518AA | NSW060       | traces-0IDQQLv  | 2016 | 4 | 27 Oceania    | Australia     | Enteritidis             | Enteritidis | 1425  | 39774 |
| SAL_FA6520AA | NSW078       | traces-0pfxCdF  | 2016 | 5 | 12 Oceania    | Australia     | Enteritidis             | Enteritidis | 1425  | 39772 |
| SAL_FA6521AA | NSW083       | traces-0JnMuHq  | 2016 | 5 | 12 Oceania    | Australia     | Enteritidis             | Enteritidis | 1425  | 39771 |
| SAL_FA6522AA | NSW086       | traces-0VRWbFp  | 2016 | 5 | 12 Oceania    | Australia     | Enteritidis             | Enteritidis | 1425  | 39770 |
| SAL_FA6523AA | NSW090       | traces-0jQKyPf  | 2016 | 5 | 12 Oceania    | Australia     | Enteritidis             | Enteritidis | 37848 | 39769 |
| SAL_FA6524AA | NSW093       | traces-0NUJeFj  | 2016 | 5 | 12 Oceania    | Australia     | Enteritidis             | Enteritidis | 1425  | 39757 |
| SAL_FA6525AA | NSW116       | traces-0pRwHdR  | 2016 | 5 | 12 Oceania    | Australia     | Enteritidis             | Enteritidis | 37847 | 39768 |
| SAL_FA6526AA | NSW162       | traces-0bYcQqn  | 2016 | 5 | 12 Oceania    | Australia     | Enteritidis             | Enteritidis | 1425  | 39767 |
| SAL_FA6527AA | NSW163       | traces-0lJsDtW  | 2016 | 5 | 12 Oceania    | Australia     | Enteritidis             | Enteritidis | 1425  | 39766 |
| SAL_FA6529AA | NSW174       | traces-0owSDgm  | 2016 | 5 | 12 Oceania    | Australia     | Enteritidis             | Enteritidis | 37849 | 39765 |
| SAL_FA6530AA | NSW 165      | traces-0AhamTE  | 2016 | 5 | 13 Oceania    | Australia     | Enteritidis             | Enteritidis | 1425  | 39764 |
| SAL_FA6531AA | NSW080       | traces-0JTVaau  | 2016 | 5 | 12 Oceania    | Australia     | Enteritidis             | Enteritidis | 1425  | 39763 |
| SAL_FA6532AA | NSW079       | traces-0PvGVGI  | 2016 | 5 | 12 Oceania    | Australia     | Enteritidis             | Enteritidis | 1425  | 39762 |
| SAL_FA6533AA | NSW081       | traces-0SqBZGX  | 2016 | 5 | 12 Oceania    | Australia     | Enteritidis             | Enteritidis | 1425  | 39758 |
| SAL_FA6534AA | NSW082       | traces-0TbNzrn  | 2016 | 5 | 12 Oceania    | Australia     | Enteritidis             | Enteritidis | 1425  | 39761 |
| SAL_FA6535AA | NSW085       | traces-0lixDeu  | 2016 | 5 | 12 Oceania    | Australia     | Enteritidis             | Enteritidis | 1425  | 39760 |
| SAL_FA6536AA | NSW084       | traces-0PqZGrp  | 2016 | 5 | 12 Oceania    | Australia     | Enteritidis             | Enteritidis | 1425  | 39787 |
| SAL_FA6537AA | NSW087       | traces-0DpCoOD  | 2016 | 5 | 12 Oceania    | Australia     | Enteritidis             | Enteritidis | 1425  | 39786 |
| SAL_FA6538AA | NSW089       | traces-0qKCeFC  | 2016 | 5 | 12 Oceania    | Australia     | Enteritidis             | Enteritidis | 1425  | 39757 |
| SAL_FA6539AA | NSW091       | traces-0hseeLw  | 2016 | 5 | 12 Oceania    | Australia     | Enteritidis             | Enteritidis | 1425  | 39785 |
| SAL_FA6540AA | NSW092       | traces-0ajlZEK  | 2016 | 5 | 12 Oceania    | Australia     | Enteritidis             | Enteritidis | 1425  | 39784 |
| SAL_FA6541AA | NSW088       | traces-0DoZmbP  | 2016 | 5 | 12 Oceania    | Australia     | Enteritidis             | Enteritidis | 1425  | 39757 |
| SAL_FA6542AA | NSW105       | traces-0GvzhrG  | 2016 | 5 | 12 Oceania    | Australia     | Enteritidis             | Enteritidis | 7942  | 39788 |
| SAL_FA6543AA | NSW164       | traces-0SOolzC  | 2016 | 5 | 12 Oceania    | Australia     | Enteritidis             | Enteritidis | 1425  | 39798 |
| SAL_FA6544AA | NSW153       | traces-0SSDedo  | 2016 | 5 | 12 Oceania    | Australia     | Enteritidis             | Enteritidis | 1425  | 39797 |
| SAL_FA6546AA | NSW103       | traces-0BYaPQf  | 2016 | 5 | 12 Oceania    | Australia     | Enteritidis             | Enteritidis | 1425  | 39795 |
| SAL_FA6549AA | NSW117       | traces-0LTxzMx  | 2016 | 5 | 12 Oceania    | Australia     | Enteritidis             | Enteritidis | 7942  | 39788 |
| SAL_FA6551AA | NSW152       | traces-0pZCBhb  | 2016 | 5 | 12 Oceania    | Australia     | Enteritidis             | Enteritidis | 1425  | 39818 |
| SAL_FA6552AA | NSW096       | traces-0aTxkDh  | 2016 | 5 | 12 Oceania    | Australia     | Enteritidis             | Enteritidis | 1425  | 39817 |
| SAL_FA6553AA | NSW095       | traces-0lUUbQMf | 2016 | 5 | 12 Oceania    | Australia     | Enteritidis             | Enteritidis | 1425  | 39816 |
| SAL_FA6554AA | NSW104       | traces-0gOLUhh  | 2016 | 5 | 12 Oceania    | Australia     | Enteritidis             | Enteritidis | 1425  | 39815 |
| SAL_FA6556AA | NSW139       | traces-0DJKctc  | 2016 | 5 | 12 Oceania    | Australia     | Enteritidis             | Enteritidis | 1425  | 39813 |
| SAL_FA6558AA | NSW140       | traces-0AnfFGC  | 2016 | 5 | 12 Oceania    | Australia     | Enteritidis             | Enteritidis | 1425  | 39838 |
| SAL_FA6559AA | NSW151       | traces-0kBiOoA  | 2016 | 5 | 12 Oceania    | Australia     | Enteritidis             | Enteritidis | 1425  | 39837 |
| SAL_FA6560AA | NSW177       | traces-0TlxUUL  | 2016 | 5 | 12 Oceania    | Australia     | Enteritidis             | Enteritidis | 37843 | 39836 |
| SAL_FA6561AA | NSW176       | traces-0ztyOLD  | 2016 | 5 | 12 Oceania    | Australia     | Enteritidis non-motile  | Enteritidis | 1425  | 39835 |
| SAL_FA6562AA | NSW175       | traces-0YLhwui  | 2016 | 5 | 12 Oceania    | Australia     | Enteritidis             | Enteritidis | 1425  | 39834 |
| SAL_FA6563AA | NSW186       | traces-0nqojSH  | 2016 | 5 | 12 Oceania    | Australia     | Enteritidis             | Enteritidis | 37736 | 39876 |
| SAL_FA6569AA | 2016K-0279   | SRR3499803      |      |   | North America | United States | Enteritidis (Predicted) | Enteritidis | 1425  | 39864 |

|              |              |                |      |    |               |               |                         |             |       |       |
|--------------|--------------|----------------|------|----|---------------|---------------|-------------------------|-------------|-------|-------|
| SAL_FA6570AA | 2016K-0278   | SRR3499802     |      |    | North America | United States | Enteritidis (Predicted) | Enteritidis | 1425  | 39869 |
| SAL_FA6571AA | 2016K-0277   | SRR3499801     |      |    | North America | United States | Enteritidis (Predicted) | Enteritidis | 1425  | 39863 |
| SAL_FA6572AA | 2016K-0275   | SRR3499799     |      |    | North America | United States | Enteritidis (Predicted) | Enteritidis | 1425  | 39868 |
| SAL_FA6573AA | 2016K-0274   | SRR3499798     |      |    | North America | United States | Enteritidis (Predicted) | Enteritidis | 1425  | 165   |
| SAL_FA6574AA | 2016K-0285   | SRR3499797     |      |    | North America | United States | Enteritidis (Predicted) | Enteritidis | 1425  | 39867 |
| SAL_FA6575AA | 2016K-0284   | SRR3499796     |      |    | North America | United States | Enteritidis (Predicted) | Enteritidis | 1425  | 39866 |
| SAL_FA6576AA | 2016K-0283   | SRR3499795     |      |    | North America | United States | Enteritidis (Predicted) | Enteritidis | 1425  | 39862 |
| SAL_FA6577AA | 2016K-0282   | SRR3499794     |      |    | North America | United States | Enteritidis (Predicted) | Enteritidis | 1425  | 39861 |
| SAL_FA6578AA | 2016K-0281   | SRR3499793     | 2016 | 1  | North America | United States | Enteritidis (Predicted) | Enteritidis | 1425  | 36319 |
| SAL_FA6579AA | 2016K-0280   | SRR3499792     |      |    | North America | United States | Enteritidis (Predicted) | Enteritidis | 1425  | 39860 |
| SAL_FA6582AA | PNUSAS002041 | SRR3499789     | 2016 | 4  | North America | United States | Enteritidis             | Enteritidis | 37133 | 39859 |
| SAL_FA6583AA | PNUSAS002040 | SRR3499788     | 2016 | 4  | North America | United States | Enteritidis             | Enteritidis | 1425  | 39856 |
| SAL_FA6586AA | PNUSAS002106 | SRR3499785     | 2016 | 3  | North America | United States | Enteritidis             | Enteritidis | 1425  | 39853 |
| SAL_FA6588AA | PNUSAS002103 | SRR3499783     | 2016 | 1  | North America | United States | Enteritidis             | Enteritidis | 1425  | 35158 |
| SAL_FA6589AA | PNUSAS002101 | SRR3499782     | 2016 | 1  | North America | United States | Enteritidis             | Enteritidis | 1425  | 39858 |
| SAL_FA6590AA | PNUSAS002100 | SRR3499781     | 2015 | 11 | North America | United States | Enteritidis             | Enteritidis | 1425  | 39857 |
| SAL_FA6592AA | PNUSAS002140 | SRR3499779     | 2016 | 4  | North America | United States | Enteritidis             | Enteritidis | 1425  | 39850 |
| SAL_FA6596AA | PNUSAS002138 | SRR3499775     |      |    | North America | United States | Enteritidis (Predicted) | Enteritidis | 1425  | 180   |
| SAL_FA6599AA | PNUSAS002065 | SRR3499772     |      |    | North America | United States | Enteritidis (Predicted) | Enteritidis | 1425  | 39810 |
| SAL_FA6600AA | PNUSAS002064 | SRR3499771     |      |    | North America | United States | Enteritidis (Predicted) | Enteritidis | 1425  | 180   |
| SAL_FA6601AA | PNUSAS002063 | SRR3499770     |      |    | North America | United States | Enteritidis (Predicted) | Enteritidis | 1425  | 39808 |
| SAL_FA6602AA | PNUSAS002062 | SRR3499769     |      |    | North America | United States | Enteritidis (Predicted) | Enteritidis | 1425  | 39807 |
| SAL_FA6603AA | PNUSAS002061 | SRR3499768     |      |    | North America | United States | Enteritidis (Predicted) | Enteritidis | 1425  | 39809 |
| SAL_FA6604AA | PNUSAS002060 | SRR3499767     |      |    | North America | United States | Enteritidis (Predicted) | Enteritidis | 1425  | 180   |
| SAL_FA6605AA | PNUSAS002059 | SRR3499766     |      |    | North America | United States | Enteritidis (Predicted) | Enteritidis | 1425  | 39806 |
| SAL_FA6606AA | PNUSAS002058 | SRR3499765     |      |    | North America | United States | Enteritidis (Predicted) | Enteritidis | 1425  | 180   |
| SAL_FA6607AA | PNUSAS002057 | SRR3499764     | 2016 | 3  | North America | United States | Enteritidis             | Enteritidis | 1425  | 39805 |
| SAL_FA6610AA | PNUSAS002130 | SRR3499745     | 2016 | 4  | North America | United States | Enteritidis             | Enteritidis | 1425  | 39802 |
| SAL_FA6611AA | PNUSAS002129 | SRR3499744     | 2016 | 3  | North America | United States | Enteritidis             | Enteritidis | 1425  | 39783 |
| SAL_FA6618AA | PNUSAS001785 | SRR3499736     | 2016 | 2  | North America | United States | Enteritidis             | Enteritidis | 1425  | 39799 |
| SAL_FA6621AA | PNUSAS002143 | SRR3499733     | 2016 | 4  | North America | United States | Enteritidis             | Enteritidis | 1425  | 39779 |
| SAL_FA6622AA | PNUSAS002142 | SRR3499732     | 2016 | 4  | North America | United States | Enteritidis             | Enteritidis | 1425  | 39778 |
| SAL_FA6624AA | PNUSAS002066 | SRR3499730     | 2016 | 4  | North America | United States | Enteritidis             | Enteritidis | 1425  | 39776 |
| SAL_FA6661AA | 2016K-0276   | SRR3499800     |      |    | North America | United States | Enteritidis (Predicted) | Enteritidis | 1425  | 39790 |
| SAL_FA6663AA | RKI_15-03486 | traces-OWJBlhz | 2015 |    | Europe        | Germany       | Enteritidis             | Enteritidis | 1425  | 39875 |
| SAL_FA6664AA | RKI_15-03455 | traces-OGolukp | 2015 |    | Europe        | Germany       | Enteritidis             | Enteritidis | 1425  | 39875 |
| SAL_FA6665AA | RKI_15-03487 | traces-OKXjCuv | 2015 |    | Europe        | Germany       | Enteritidis             | Enteritidis | 1425  | 39875 |
| SAL_FA6668AA | CVM-N27408   | SRR3503030     | 2010 |    | North America | United States | Enteritidis             | Enteritidis | 1425  | 39885 |
| SAL_FA6674AA | CVM-N27396   | SRR3502966     | 2010 |    | North America | United States | Enteritidis             | Enteritidis | 1425  | 12469 |
| SAL_FA6760AA | RKI_15-01563 | traces-OeaumVN | 2015 |    | Europe        | Germany       | Enteritidis             | Enteritidis | 3961  | 39904 |
| SAL_FA6761AA | RKI_15-03374 | traces-OBTFEXp | 2015 |    | Europe        | Germany       | Enteritidis             | Enteritidis | 1425  | 39903 |
| SAL_FA6762AA | RKI_14-04275 | traces-OqBZlrz | 2014 |    | Europe        | Germany       | Enteritidis             | Enteritidis | 1425  | 39905 |
| SAL_FA6763AA | RKI_15-03456 | traces-OTVyht  | 2015 |    | Europe        | Germany       | Enteritidis             | Enteritidis | 1425  | 39875 |
| SAL_FA6764AA | RKI_15-03375 | traces-OLEeHds | 2015 |    | Europe        | Germany       | Enteritidis             | Enteritidis | 1425  | 39875 |
| SAL_FA6765AA | RKI_15-03373 | traces-ODrgpKV | 2015 |    | Europe        | Germany       | Enteritidis             | Enteritidis | 1425  | 39875 |
| SAL_FA6803AA | PNUSAS001776 | SRR3521385     |      |    | North America | United States | Enteritidis (Predicted) | Enteritidis | 1425  | 39946 |
| SAL_FA6817AA | I2016006669  | SRR3509923     | 2016 | 5  | North America | United States | Enteritidis             | Enteritidis | 1425  | 39932 |
| SAL_FA6818AA | I2016006642  | SRR3509922     | 2016 | 5  | North America | United States | Enteritidis             | Enteritidis | 1425  | 39931 |
| SAL_FA6819AA | I2016006566  | SRR3571304     | 2016 | 5  | North America | United States | Enteritidis             | Enteritidis | 1425  | 39930 |
| SAL_FA6820AA | I2016006553  | SRR3509919     | 2016 | 4  | North America | United States | Enteritidis             | Enteritidis | 1425  | 39929 |
| SAL_FA6821AA | E2016006813  | SRR3571301     | 2016 | 5  | North America | United States | Enteritidis             | Enteritidis | 1425  | 39928 |
| SAL_FA6830AA | CVM-N28367   | SRR3509889     | 2010 |    | North America | United States | Enteritidis             | Enteritidis | 1425  | 39919 |
| SAL_FA6835AA | CVM-N27419   | SRR3509882     | 2010 |    | North America | United States | Enteritidis             | Enteritidis | 1425  | 39910 |
| SAL_FA6837AA | CVM-N27417   | SRR3509874     | 2010 |    | North America | United States | Enteritidis             | Enteritidis | 1425  | 39909 |
| SAL_FA6846AA | NSW187       | traces-OFUdwGL | 2016 | 5  | 18 Oceania    | Australia     | Enteritidis             | Enteritidis | 1425  | 39993 |
| SAL_FA6849AA | NSW048       | traces-OnkkKQp | 2016 | 5  | 18            |               | Enteritidis             | Enteritidis | 1425  | 39991 |
| SAL_FA6850AA | NSW049       | traces-OgEizau | 2016 | 5  | 18 Oceania    | Australia     | Enteritidis             | Enteritidis | 1425  | 39990 |
| SAL_FA6851AA | NSW050       | traces-OHLJYvN | 2016 | 5  | 18 Oceania    | Australia     | Enteritidis             | Enteritidis | 1425  | 16325 |
| SAL_FA6852AA | NSW051       | traces-OMJgsan | 2016 | 5  | 18 Oceania    | Australia     | Enteritidis             | Enteritidis | 1425  | 39989 |

|              |                |                 |      |   |               |                |                         |             |       |       |
|--------------|----------------|-----------------|------|---|---------------|----------------|-------------------------|-------------|-------|-------|
| SAL_FA6853AA | NSW052         | traces-0OVexSJ  | 2016 | 5 | 18 Oceania    | Australia      | Enteritidis             | Enteritidis | 1425  | 651   |
| SAL_FA6855AA | NSW054         | traces-0XgKUPm  | 2016 | 5 | 18 Oceania    | Australia      | Enteritidis             | Enteritidis | 1425  | 39987 |
| SAL_FA6856AA | NSW29-055      | traces-0efxQoM  | 2016 | 5 | 18 Oceania    | Australia      | Enteritidis             | Enteritidis | 1425  | 39986 |
| SAL_FA6857AA | NSW29-056      | traces-0tPDBPV  | 2016 | 5 | 18 Oceania    | Australia      | Enteritidis             | Enteritidis | 27796 | 39985 |
| SAL_FA6858AA | NSW29-057      | traces-0aeFODc  | 2016 | 5 | 18 Oceania    | Australia      | Enteritidis             | Enteritidis | 1425  | 39984 |
| SAL_FA6859AA | NSW29-058      | traces-0wmAwHM  | 2016 | 5 | 18 Oceania    | Australia      | Enteritidis             | Enteritidis | 38220 | 39983 |
| SAL_FA6860AA | NSW29-059      | traces-0TzZDEz  | 2016 | 5 | 18 Oceania    | Australia      | Enteritidis             | Enteritidis | 1425  | 39982 |
| SAL_FA6861AA | NSW29-060      | traces-0YNwRSs  | 2016 | 5 | 18 Oceania    | Australia      | Enteritidis             | Enteritidis | 1425  | 39981 |
| SAL_FA6862AA | NSW29-061      | traces-0LqDcbl  | 2016 | 5 | 18 Oceania    | Australia      | Enteritidis             | Enteritidis | 28689 | 39980 |
| SAL_FA6865AA | NSW29-064      | traces-0bNEGJC  | 2016 | 5 | 18 Oceania    | Australia      | Enteritidis             | Enteritidis | 1425  | 39977 |
| SAL_FA6869AA | NSW29-068      | traces-0isVqBY  | 2016 | 5 | 18            |                | Enteritidis             | Enteritidis | 1425  | 40008 |
| SAL_FA6872AA | NSW29-071      | traces-0wnNIEAs | 2016 | 5 | 18 Oceania    | Australia      | Enteritidis             | Enteritidis | 1425  | 40005 |
| SAL_FA6873AA | NSW29-072      | traces-0sOxEJe  | 2016 | 5 | 18 Oceania    | Australia      | Enteritidis             | Enteritidis | 1425  | 7578  |
| SAL_FA6874AA | NSW29-072      | traces-0RwjTYb  | 2016 | 5 | 18 Oceania    | Australia      | Enteritidis             | Enteritidis | 1425  | 7578  |
| SAL_FA6875AA | NSW29-073      | traces-0NpChRa  | 2016 | 5 | 18 Oceania    | Australia      | Enteritidis             | Enteritidis | 1425  | 40004 |
| SAL_FA6877AA | NSW29-075      | traces-0rRjPd   | 2016 | 5 | 18 Oceania    | Australia      | Enteritidis             | Enteritidis | 1425  | 40002 |
| SAL_FA6878AA | NSW29-086      | traces-0QPChTK  | 2016 | 5 | 18 Oceania    | Australia      | Enteritidis             | Enteritidis | 38332 | 40001 |
| SAL_FA6879AA | NSW29-087      | traces-0mcovUs  | 2016 | 5 | 18 Oceania    | Australia      | Enteritidis             | Enteritidis | 37843 | 40000 |
| SAL_FA6880AA | NSW29-088      | traces-0DYsdcc  | 2016 | 5 | 18 Oceania    | Australia      | Enteritidis             | Enteritidis | 1425  | 39999 |
| SAL_FA6881AA | NSW29-089      | traces-0KAawPI  | 2016 | 5 | 18 Oceania    | Australia      | Enteritidis             | Enteritidis | 7942  | 39788 |
| SAL_FA6882AA | NSW12-072      | traces-0Cifnuc  | 2016 | 5 | 18 Oceania    | Australia      | Enteritidis             | Enteritidis | 7942  | 39998 |
| SAL_FA6885AA | NSW12-077      | traces-0ckAkzJ  | 2016 | 5 | 18 Oceania    | Australia      | Enteritidis             | Enteritidis | 1425  | 39995 |
| SAL_FA6900AA | RKI_15-03580   | traces-0YpbnDL  | 2015 |   | Europe        | Germany        | Enteritidis             | Enteritidis | 1425  | 40023 |
| SAL_FA6901AA | RKI_15-03489   | traces-0xyhVWF  | 2015 |   | Europe        | Germany        | Enteritidis             | Enteritidis | 1425  | 39875 |
| SAL_FA6902AA | RKI_15-03367   | traces-0ZJkesv  | 2015 |   | Europe        | Germany        | Enteritidis             | Enteritidis | 1425  | 39875 |
| SAL_FA6903AA | RKI_15-03579_2 | traces-0xvkjrf  | 2015 |   | Europe        | Germany        | Enteritidis             | Enteritidis | 1425  | 40025 |
| SAL_FA6904AA | RKI_15-03552   | traces-0zXCrNj  | 2015 |   | Europe        | Germany        | Enteritidis             | Enteritidis | 1425  | 39875 |
| SAL_FA6905AA | RKI_15-03440   | traces-0BvhXaE  | 2015 |   | Europe        | Germany        | Enteritidis             | Enteritidis | 1425  | 39875 |
| SAL_FA6906AA | RKI_15-03370   | traces-0JQaHtq  | 2015 |   | Europe        | Germany        | Enteritidis             | Enteritidis | 1425  | 39875 |
| SAL_FA6907AA | RKI_15-03614   | traces-0MBFFGG  | 2015 |   | Europe        | Germany        | Enteritidis             | Enteritidis | 1425  | 39875 |
| SAL_FA6908AA | RKI_15-03538   | traces-0zQxIVL  | 2015 |   | Europe        | Germany        | Enteritidis             | Enteritidis | 1425  | 40024 |
| SAL_FA6909AA | RKI_15-03637   | traces-0SUxbKa  | 2015 |   | Europe        | Germany        | Enteritidis             | Enteritidis | 1425  | 40026 |
| SAL_FA6910AA | RKI_15-03654   | traces-0UjMbsn  | 2015 |   | Europe        | Germany        | Enteritidis             | Enteritidis | 1425  | 40027 |
| SAL_FA6924AA | CVM-N28611     | SRR3547960      | 2010 |   | North America | United States  | Enteritidis             | Enteritidis | 1425  | 40030 |
| SAL_FA6926AA | CVM-N28608     | SRR3547958      | 2010 |   | North America | United States  | Enteritidis             | Enteritidis | 1425  | 40030 |
| SAL_FA6961AA | H14330_0431    | traces-0dquTVz  |      |   | Europe        | United Kingdom | Enteritidis             | Enteritidis | 3888  | 2066  |
| SAL_FA6962AA | H14346_0537    | traces-0UwPlna  |      |   | Europe        | United Kingdom | Enteritidis             | Enteritidis | 3888  | 40066 |
| SAL_FA6963AA | L00851-15      | traces-0RBsedb  |      |   | Europe        | United Kingdom | Enteritidis (Predicted) | Enteritidis | 1425  | 40042 |
| SAL_FA6964AA | L00786-15      | traces-0HhYcrH  |      |   | Europe        | United Kingdom | Enteritidis (Predicted) | Enteritidis | 1425  | 40065 |
| SAL_FA6965AA | L00999-15      | traces-0wusDwN  |      |   | Europe        | United Kingdom | Enteritidis (Predicted) | Enteritidis | 3888  | 40064 |
| SAL_FA6966AA | L01100-13      | traces-0VvBGsX  |      |   | Europe        | United Kingdom | Enteritidis (Predicted) | Enteritidis | 3888  | 40063 |
| SAL_FA6967AA | L01381-10      | traces-0srtMpj  |      |   | Europe        | United Kingdom | Enteritidis (Predicted) | Enteritidis | 1425  | 40062 |
| SAL_FA6968AA | L01382-10      | traces-0JZPjay  |      |   | Europe        | United Kingdom | Enteritidis (Predicted) | Enteritidis | 1425  | 40061 |
| SAL_FA6969AA | S00018-15      | traces-0mKAsOB  |      |   | Europe        | United Kingdom | Enteritidis (Predicted) | Enteritidis | 3888  | 40060 |
| SAL_FA6970AA | S00095-14      | traces-0dvePJQ  |      |   | Europe        | United Kingdom | Enteritidis (Predicted) | Enteritidis | 3888  | 40059 |
| SAL_FA6971AA | S00099-14      | traces-0hQndUx  |      |   | Europe        | United Kingdom | Enteritidis (Predicted) | Enteritidis | 3888  | 40058 |
| SAL_FA6972AA | S00964-05      | traces-0vlGppqG |      |   | Europe        | United Kingdom | Enteritidis (Predicted) | Enteritidis | 1425  | 40057 |
| SAL_FA6973AA | S00432_16      | traces-0skdtcu  |      |   | Europe        | United Kingdom | Enteritidis (Predicted) | Enteritidis | 1425  | 40056 |
| SAL_FA6974AA | S01041-15      | traces-0EoORsu  |      |   | Europe        | United Kingdom | Enteritidis (Predicted) | Enteritidis | 1425  | 40055 |
| SAL_FA6975AA | S01909-15      | traces-0OIzgtL  |      |   | Europe        | United Kingdom | Enteritidis (Predicted) | Enteritidis | 1425  | 40054 |
| SAL_FA6976AA | S02006-15      | traces-0npRCMd  |      |   | Europe        | United Kingdom | Enteritidis (Predicted) | Enteritidis | 1425  | 40053 |
| SAL_FA6977AA | S02037-10      | traces-0qJkLv   |      |   | Europe        | United Kingdom | Enteritidis (Predicted) | Enteritidis | 1425  | 40052 |
| SAL_FA6978AA | S02014-15      | traces-0TaNUHC  |      |   | Europe        | United Kingdom | Enteritidis (Predicted) | Enteritidis | 1425  | 503   |
| SAL_FA6979AA | S02159-15      | traces-0CayCCr  |      |   | Europe        | United Kingdom | Enteritidis (Predicted) | Enteritidis | 1425  | 503   |
| SAL_FA6980AA | S02161-15      | traces-0BngJhd  |      |   | Europe        | United Kingdom | Enteritidis (Predicted) | Enteritidis | 1425  | 40051 |
| SAL_FA6981AA | S02213-15      | traces-0xvPFBm  |      |   | Europe        | United Kingdom | Enteritidis (Predicted) | Enteritidis | 1425  | 40043 |
| SAL_FA6982AA | S02160-15      | traces-0AdhToW  |      |   | Europe        | United Kingdom | Enteritidis (Predicted) | Enteritidis | 1425  | 503   |
| SAL_FA6983AA | S02222-15      | traces-0APlnzr  |      |   | Europe        | United Kingdom | Enteritidis (Predicted) | Enteritidis | 1425  | 40050 |
| SAL_FA6984AA | S02225-15      | traces-0VBhArw  |      |   | Europe        | United Kingdom | Enteritidis (Predicted) | Enteritidis | 1425  | 40044 |

|              |            |                |        |                |                         |             |       |       |
|--------------|------------|----------------|--------|----------------|-------------------------|-------------|-------|-------|
| SAL_FA6985AA | S02227-15  | traces-0BIfAhv | Europe | United Kingdom | Enteritidis (Predicted) | Enteritidis | 1425  | 40049 |
| SAL_FA6986AA | S02273-15  | traces-0dkCYLF | Europe | United Kingdom | Enteritidis (Predicted) | Enteritidis | 1425  | 40048 |
| SAL_FA6987AA | S02228-15  | traces-0ldanhS | Europe | United Kingdom | Enteritidis (Predicted) | Enteritidis | 1425  | 503   |
| SAL_FA6988AA | S02440-15  | traces-0ZpxmUZ | Europe | United Kingdom | Enteritidis (Predicted) | Enteritidis | 1425  | 40047 |
| SAL_FA6989AA | S02356-15  | traces-0Hlcety | Europe | United Kingdom | Enteritidis (Predicted) | Enteritidis | 1425  | 40045 |
| SAL_FA6990AA | S02498-15  | traces-0gvLxwh | Europe | United Kingdom | Enteritidis (Predicted) | Enteritidis | 1425  | 40046 |
| SAL_FA6991AA | S02665-15  | traces-0sMwhys | Europe | United Kingdom | Enteritidis (Predicted) | Enteritidis | 1425  | 40079 |
| SAL_FA6993AA | S02576-15  | traces-0eKSlan | Europe | United Kingdom | Enteritidis (Predicted) | Enteritidis | 1425  | 40067 |
| SAL_FA6994AA | S02669-15  | traces-0mTURhY | Europe | United Kingdom | Enteritidis (Predicted) | Enteritidis | 1425  | 40068 |
| SAL_FA6995AA | S02674-15  | traces-0LLIShN | Europe | United Kingdom | Enteritidis (Predicted) | Enteritidis | 1425  | 503   |
| SAL_FA6996AA | S02675-15  | traces-0SMoUVK | Europe | United Kingdom | Enteritidis (Predicted) | Enteritidis | 1425  | 503   |
| SAL_FA6997AA | S02677-15  | traces-0hZHozR | Europe | United Kingdom | Enteritidis (Predicted) | Enteritidis | 1425  | 40070 |
| SAL_FA6998AA | S02679-15  | traces-0EieKUZ | Europe | United Kingdom | Enteritidis (Predicted) | Enteritidis | 1425  | 40069 |
| SAL_FA6999AA | S02683-15  | traces-0zFhYEF | Europe | United Kingdom | Enteritidis (Predicted) | Enteritidis | 1425  | 40071 |
| SAL_FA7000AA | S02681-15  | traces-0Jknxvu | Europe | United Kingdom | Enteritidis (Predicted) | Enteritidis | 38379 | 40072 |
| SAL_FA7001AA | S02687-15  | traces-0lPtpmU | Europe | United Kingdom | Enteritidis (Predicted) | Enteritidis | 1425  | 40078 |
| SAL_FA7002AA | S02690-15  | traces-0XuPeLq | Europe | United Kingdom | Enteritidis (Predicted) | Enteritidis | 1425  | 40073 |
| SAL_FA7003AA | S02857-15  | traces-0OCjshO | Europe | United Kingdom | Enteritidis (Predicted) | Enteritidis | 1425  | 40075 |
| SAL_FA7004AA | S03145-11  | traces-0oPDuSP | Europe | United Kingdom | Enteritidis (Predicted) | Enteritidis | 1425  | 40074 |
| SAL_FA7005AA | S03570-15  | traces-0TTPdsV | Europe | United Kingdom | Enteritidis (Predicted) | Enteritidis | 38616 | 40076 |
| SAL_FA7006AA | S03573-15  | traces-0YaVEcy | Europe | United Kingdom | Enteritidis (Predicted) | Enteritidis | 38616 | 40076 |
| SAL_FA7007AA | S03734-07  | traces-0rVUsSM | Europe | United Kingdom | Enteritidis (Predicted) | Enteritidis | 1425  | 40080 |
| SAL_FA7008AA | S04084-15  | traces-0leWVHN | Europe | United Kingdom | Enteritidis (Predicted) | Enteritidis | 38616 | 40077 |
| SAL_FA7009AA | S04085-15  | traces-0VySHAx | Europe | United Kingdom | Enteritidis (Predicted) | Enteritidis | 1425  | 503   |
| SAL_FA7010AA | S04740-11  | traces-0tUFehg | Europe | United Kingdom | Enteritidis (Predicted) | Enteritidis | 1425  | 40118 |
| SAL_FA7012AA | S05532-04  | traces-0EcXsTJ | Europe | United Kingdom | Enteritidis             | Enteritidis | 3888  | 40116 |
| SAL_FA7013AA | S05859-09  | traces-0IszkNX | Europe | United Kingdom | Enteritidis (Predicted) | Enteritidis | 1425  | 40115 |
| SAL_FA7017AA | S15-000930 | traces-0fVvIix | Europe | United Kingdom | Enteritidis (Predicted) | Enteritidis | 1425  | 40114 |
| SAL_FA7018AA | S15-001327 | traces-0zMJTEy | Europe | United Kingdom | Enteritidis (Predicted) | Enteritidis | 1425  | 40113 |
| SAL_FA7019AA | S15-001649 | traces-0gIfXfk | Europe | United Kingdom | Enteritidis (Predicted) | Enteritidis | 1425  | 40112 |
| SAL_FA7020AA | S15-002286 | traces-0MyRYtP | Europe | United Kingdom | Enteritidis (Predicted) | Enteritidis | 1425  | 503   |
| SAL_FA7021AA | S15-002695 | traces-0HPIZfF | Europe | United Kingdom | Enteritidis (Predicted) | Enteritidis | 1425  | 40111 |
| SAL_FA7022AA | S15-1151   | traces-0SITcUx | Europe | United Kingdom | Enteritidis (Predicted) | Enteritidis | 1425  | 40110 |
| SAL_FA7023AA | S15-1217   | traces-0mWWgyX | Europe | United Kingdom | Enteritidis (Predicted) | Enteritidis | 1425  | 40109 |
| SAL_FA7025AA | S15-1364L  | traces-0qOulMr | Europe | United Kingdom | Enteritidis (Predicted) | Enteritidis | 1425  | 40108 |
| SAL_FA7026AA | S15-1765   | traces-0nJMsCH | Europe | United Kingdom | Enteritidis (Predicted) | Enteritidis | 1425  | 40107 |
| SAL_FA7028AA | L00758-15  | traces-0WqOepE | Europe | United Kingdom | Enteritidis (Predicted) | Enteritidis | 1425  | 40106 |
| SAL_FA7029AA | L00416-10  | traces-0nanEbU | Europe | United Kingdom | Enteritidis (Predicted) | Enteritidis | 1425  | 40105 |
| SAL_FA7030AA | L00759-15  | traces-0nehBfu | Europe | United Kingdom | Enteritidis (Predicted) | Enteritidis | 1425  | 40104 |
| SAL_FA7031AA | L00781-15  | traces-0RErxnT | Europe | United Kingdom | Enteritidis (Predicted) | Enteritidis | 1425  | 40103 |
| SAL_FA7032AA | S00023-14  | traces-0fGKjSZ | Europe | United Kingdom | Enteritidis (Predicted) | Enteritidis | 3888  | 40102 |
| SAL_FA7033AA | L02106-15  | traces-0lyrNfC | Europe | United Kingdom | Enteritidis (Predicted) | Enteritidis | 1425  | 40101 |
| SAL_FA7034AA | S00172-05  | traces-0YHOYzc | Europe | United Kingdom | Enteritidis (Predicted) | Enteritidis | 1425  | 40100 |
| SAL_FA7035AA | S00994-15  | traces-0XfjcNm | Europe | United Kingdom | Enteritidis (Predicted) | Enteritidis | 1425  | 40099 |
| SAL_FA7036AA | L01193-15  | traces-0qFcidt | Europe | United Kingdom | Enteritidis (Predicted) | Enteritidis | 1425  | 503   |
| SAL_FA7037AA | S00854-15  | traces-0HMTOSo | Europe | United Kingdom | Enteritidis (Predicted) | Enteritidis | 1425  | 40098 |
| SAL_FA7038AA | S02007-15  | traces-0qnBGfK | Europe | United Kingdom | Enteritidis (Predicted) | Enteritidis | 1425  | 40097 |
| SAL_FA7039AA | S01239-12  | traces-0KYESKn | Europe | United Kingdom | Enteritidis (Predicted) | Enteritidis | 3888  | 40096 |
| SAL_FA7040AA | S00993-15  | traces-0JoQvVD | Europe | United Kingdom | Enteritidis (Predicted) | Enteritidis | 1425  | 40095 |
| SAL_FA7041AA | S02013-15  | traces-0gHesNJ | Europe | United Kingdom | Enteritidis (Predicted) | Enteritidis | 1425  | 40094 |
| SAL_FA7042AA | S02215-15  | traces-0IAQvNh | Europe | United Kingdom | Enteritidis (Predicted) | Enteritidis | 1425  | 40093 |
| SAL_FA7043AA | S02217-15  | traces-0JfC0a  | Europe | United Kingdom | Enteritidis (Predicted) | Enteritidis | 1425  | 40092 |
| SAL_FA7044AA | S02226-15  | traces-0paAnSR | Europe | United Kingdom | Enteritidis (Predicted) | Enteritidis | 1425  | 40091 |
| SAL_FA7045AA | S02229-15  | traces-0eunffe | Europe | United Kingdom | Enteritidis (Predicted) | Enteritidis | 1425  | 40090 |
| SAL_FA7046AA | S02274-15  | traces-0Emmmim | Europe | United Kingdom | Enteritidis (Predicted) | Enteritidis | 1425  | 40089 |
| SAL_FA7047AA | S02220-15  | traces-0UVmJmi | Europe | United Kingdom | Enteritidis (Predicted) | Enteritidis | 1425  | 40088 |
| SAL_FA7048AA | S02158-15  | traces-0KqNfTS | Europe | United Kingdom | Enteritidis (Predicted) | Enteritidis | 1425  | 503   |
| SAL_FA7049AA | S02276-15  | traces-0UJQNaR | Europe | United Kingdom | Enteritidis (Predicted) | Enteritidis | 1425  | 40087 |
| SAL_FA7050AA | S02441-15  | traces-0JBeGck | Europe | United Kingdom | Enteritidis (Predicted) | Enteritidis | 1425  | 40086 |

|              |             |                |      |        |                |                         |             |       |       |
|--------------|-------------|----------------|------|--------|----------------|-------------------------|-------------|-------|-------|
| SAL_FA7051AA | S02355-15   | traces-0BuzZnH |      | Europe | United Kingdom | Enteritidis (Predicted) | Enteritidis | 1425  | 40085 |
| SAL_FA7052AA | S02457-15   | traces-0rHYeHr |      | Europe | United Kingdom | Enteritidis (Predicted) | Enteritidis | 1425  | 40084 |
| SAL_FA7053AA | S02463-15   | traces-0gQtKGu |      | Europe | United Kingdom | Enteritidis (Predicted) | Enteritidis | 1425  | 40083 |
| SAL_FA7054AA | S02508-15   | traces-0YLeXYH |      | Europe | United Kingdom | Enteritidis (Predicted) | Enteritidis | 1425  | 40082 |
| SAL_FA7055AA | S02671-15   | traces-0LBlBYy |      | Europe | United Kingdom | Enteritidis (Predicted) | Enteritidis | 1425  | 40081 |
| SAL_FA7056AA | S02670-15   | traces-0uBvONG |      | Europe | United Kingdom | Enteritidis (Predicted) | Enteritidis | 1425  | 40130 |
| SAL_FA7057AA | S02511-15   | traces-0zxJEqB |      | Europe | United Kingdom | Enteritidis (Predicted) | Enteritidis | 1425  | 40129 |
| SAL_FA7058AA | S02668-15   | traces-0XUotob |      | Europe | United Kingdom | Enteritidis (Predicted) | Enteritidis | 1425  | 40128 |
| SAL_FA7060AA | S02672-15   | traces-0DtnCaG |      | Europe | United Kingdom | Enteritidis (Predicted) | Enteritidis | 1425  | 40127 |
| SAL_FA7061AA | S02680-15   | traces-0JSBRgM |      | Europe | United Kingdom | Enteritidis (Predicted) | Enteritidis | 1425  | 40126 |
| SAL_FA7062AA | S02682-15   | traces-0rarDnC |      | Europe | United Kingdom | Enteritidis (Predicted) | Enteritidis | 1425  | 40160 |
| SAL_FA7063AA | S02673-15   | traces-0YkWfBj |      | Europe | United Kingdom | Enteritidis (Predicted) | Enteritidis | 1425  | 503   |
| SAL_FA7064AA | S02678-15   | traces-0lvbuKf |      | Europe | United Kingdom | Enteritidis (Predicted) | Enteritidis | 1425  | 40159 |
| SAL_FA7065AA | S02676-15   | traces-0vLuRrp |      | Europe | United Kingdom | Enteritidis (Predicted) | Enteritidis | 1425  | 40158 |
| SAL_FA7067AA | S02684-15   | traces-0isXhMd |      | Europe | United Kingdom | Enteritidis (Predicted) | Enteritidis | 1425  | 40157 |
| SAL_FA7068AA | S02686-15   | traces-0FoeaYc |      | Europe | United Kingdom | Enteritidis (Predicted) | Enteritidis | 1425  | 40125 |
| SAL_FA7069AA | S02688-15   | traces-0BIeIce |      | Europe | United Kingdom | Enteritidis (Predicted) | Enteritidis | 1425  | 40119 |
| SAL_FA7070AA | S02691-15   | traces-0JYFCr  |      | Europe | United Kingdom | Enteritidis (Predicted) | Enteritidis | 1425  | 40124 |
| SAL_FA7071AA | S02832-15   | traces-0HBIKHf |      | Europe | United Kingdom | Enteritidis (Predicted) | Enteritidis | 1425  | 40123 |
| SAL_FA7072AA | S02689-15   | traces-0BKcdFd |      | Europe | United Kingdom | Enteritidis (Predicted) | Enteritidis | 1425  | 40120 |
| SAL_FA7073AA | S02833-15   | traces-0LGMSia |      | Europe | United Kingdom | Enteritidis (Predicted) | Enteritidis | 1425  | 40121 |
| SAL_FA7074AA | S02858-15   | traces-0eEarUv |      | Europe | United Kingdom | Enteritidis (Predicted) | Enteritidis | 1425  | 40122 |
| SAL_FA7075AA | S02860-15   | traces-0kxtEud |      | Europe | United Kingdom | Enteritidis (Predicted) | Enteritidis | 1425  | 40145 |
| SAL_FA7076AA | S02856-15   | traces-0WrkUnT |      | Europe | United Kingdom | Enteritidis (Predicted) | Enteritidis | 1425  | 40144 |
| SAL_FA7077AA | S03342-11   | traces-0FQjamq |      | Europe | United Kingdom | Enteritidis (Predicted) | Enteritidis | 1425  | 40143 |
| SAL_FA7078AA | S03351-15   | traces-0PrHXVP |      | Europe | United Kingdom | Enteritidis (Predicted) | Enteritidis | 1425  | 40131 |
| SAL_FA7079AA | S03669-15   | traces-0KkfquQ |      | Europe | United Kingdom | Enteritidis (Predicted) | Enteritidis | 1425  | 40142 |
| SAL_FA7080AA | S03571-15   | traces-0OIHvNv |      | Europe | United Kingdom | Enteritidis (Predicted) | Enteritidis | 38616 | 40156 |
| SAL_FA7081AA | S03742-15   | traces-0DOnKNv |      | Europe | United Kingdom | Enteritidis (Predicted) | Enteritidis | 1425  | 40141 |
| SAL_FA7082AA | S03572-15   | traces-0ioKFpb |      | Europe | United Kingdom | Enteritidis (Predicted) | Enteritidis | 38616 | 40076 |
| SAL_FA7083AA | S02862-15   | traces-0YbYsEn |      | Europe | United Kingdom | Enteritidis (Predicted) | Enteritidis | 1425  | 503   |
| SAL_FA7084AA | S04055-15   | traces-0GbpqeE |      | Europe | United Kingdom | Enteritidis (Predicted) | Enteritidis | 1425  | 40155 |
| SAL_FA7085AA | S04086-15   | traces-0htNKHg |      | Europe | United Kingdom | Enteritidis (Predicted) | Enteritidis | 38616 | 40076 |
| SAL_FA7086AA | S05-0398    | traces-0YZEFox |      | Europe | United Kingdom | Enteritidis (Predicted) | Enteritidis | 38613 | 48250 |
| SAL_FA7088AA | S05658-06   | traces-0ZXOthO |      | Europe | United Kingdom | Enteritidis (Predicted) | Enteritidis | 1425  | 40152 |
| SAL_FA7089AA | S05-000397  | traces-0qmhaph |      | Europe | United Kingdom | Enteritidis (Predicted) | Enteritidis | 1425  | 40140 |
| SAL_FA7090AA | S06824-06   | traces-0eQVNFk |      | Europe | United Kingdom | Enteritidis (Predicted) | Enteritidis | 1425  | 40139 |
| SAL_FA7093AA | S15-002261  | traces-0pQoZaF |      | Europe | United Kingdom | Enteritidis (Predicted) | Enteritidis | 1425  | 503   |
| SAL_FA7094AA | S15-002694  | traces-0GNILXJ |      | Europe | United Kingdom | Enteritidis (Predicted) | Enteritidis | 1425  | 40138 |
| SAL_FA7095AA | S15-1150    | traces-0ONXCsH |      | Europe | United Kingdom | Enteritidis (Predicted) | Enteritidis | 1425  | 40137 |
| SAL_FA7096AA | S15-001578  | traces-0eEnzzS |      | Europe | United Kingdom | Enteritidis (Predicted) | Enteritidis | 1425  | 40136 |
| SAL_FA7097AA | S15-001577  | traces-0SeREfn |      | Europe | United Kingdom | Enteritidis (Predicted) | Enteritidis | 1425  | 40112 |
| SAL_FA7098AA | S15-1223    | traces-0Eoyxjh |      | Europe | United Kingdom | Enteritidis (Predicted) | Enteritidis | -7006 | 40135 |
| SAL_FA7099AA | S15-1154    | traces-0LDpTAm |      | Europe | United Kingdom | Enteritidis (Predicted) | Enteritidis | 1425  | 40132 |
| SAL_FA7102AA | S15-1664    | traces-0NhGSMS |      | Europe | United Kingdom | Enteritidis (Predicted) | Enteritidis | 1425  | 40133 |
| SAL_FA7107AA | L00853-15   | traces-0SEgMZU |      | Europe | United Kingdom | Enteritidis (Predicted) | Enteritidis | 1425  | 40162 |
| SAL_FA7108AA | L00855-15   | traces-0EmYNaw |      | Europe | United Kingdom | Enteritidis (Predicted) | Enteritidis | 1425  | 40148 |
| SAL_FA7109AA | S02859-15   | traces-0OPPuvE |      | Europe | United Kingdom | Enteritidis (Predicted) | Enteritidis | 1425  | 503   |
| SAL_FA7110AA | S02861-15   | traces-0BofoLc |      | Europe | United Kingdom | Enteritidis (Predicted) | Enteritidis | 1425  | 40147 |
| SAL_FA7111AA | S03-005205  | traces-0JcWduz |      | Europe | United Kingdom | Enteritidis (Predicted) | Enteritidis | 1425  | 40146 |
| SAL_FA7112AA | S15-003806  | traces-0Ecpsuu |      | Europe | United Kingdom | Enteritidis (Predicted) | Enteritidis | 1425  | 503   |
| SAL_FA7128AA | I2016007212 | SRR3571338     | 2016 | 5      | North America  | United States           | Enteritidis | 1425  | 40916 |
| SAL_FA7129AA | I2016007211 | SRR3571313     | 2016 | 5      | North America  | United States           | Enteritidis | 1425  | 40916 |
| SAL_FA7130AA | I2016007000 | SRR3571312     | 2016 | 5      | North America  | United States           | Enteritidis | 1425  | 40916 |
| SAL_FA7131AA | I2016006999 | SRR3571311     | 2016 | 5      | North America  | United States           | Enteritidis | 1425  | 40916 |
| SAL_FA7138AA | E2016007253 | SRR3571302     | 2016 | 5      | North America  | United States           | Enteritidis | 34197 | 41685 |
| SAL_FA7139AA | E2016006696 | SRR3571300     | 2016 | 4      | North America  | United States           | Enteritidis | 1425  | 1171  |
| SAL_FA7140AA | I2016006732 | SRR3571281     | 2016 | 5      | North America  | United States           | Enteritidis | 1425  | 29454 |
| SAL_FA7141AA | E2016007250 | SRR3571280     | 2016 | 5      | North America  | United States           | Enteritidis | 1425  | 41684 |

|              |              |                |      |    |  |               |                |                         |             |       |       |
|--------------|--------------|----------------|------|----|--|---------------|----------------|-------------------------|-------------|-------|-------|
| SAL_FA7142AA | PNUSAS002043 | SRR3572573     |      |    |  | North America | United States  | Enteritidis (Predicted) | Enteritidis | 27863 | 40225 |
| SAL_FA7143AA | PNUSAS002199 | SRR3572571     | 2016 | 3  |  | North America | United States  | Enteritidis             | Enteritidis | 1425  | 40224 |
| SAL_FA7144AA | PNUSAS002108 | SRR3572570     | 2016 | 3  |  | North America | United States  | Enteritidis             | Enteritidis | 1425  | 40226 |
| SAL_FA7146AA | PNUSAS002197 | SRR3572527     | 2016 | 2  |  | North America | United States  | Enteritidis             | Enteritidis | 1425  | 617   |
| SAL_FA7147AA | PNUSAS002102 | SRR3572506     | 2016 | 1  |  | North America | United States  | Enteritidis             | Enteritidis | 37741 | 41683 |
| SAL_FA7149AA | PNUSAS002195 | SRR3572456     | 2016 | 1  |  | North America | United States  | Enteritidis             | Enteritidis | 1425  | 6087  |
| SAL_FA7161AA | PNUSAS002135 | SRR3571906     | 2016 | 3  |  | North America | United States  | Enteritidis             | Enteritidis | 1425  | 180   |
| SAL_FA7167AA | PNUSAS002208 | SRR3571791     |      |    |  | North America | United States  | Enteritidis (Predicted) | Enteritidis | 34197 | 41671 |
| SAL_FA7168AA | PNUSAS002207 | SRR3571790     |      |    |  | North America | United States  | Enteritidis (Predicted) | Enteritidis | 1425  | 41670 |
| SAL_FA7180AA | PNUSAS002252 | SRR3573841     | 2016 | 4  |  | North America | United States  | Enteritidis             | Enteritidis | 1425  | 40210 |
| SAL_FA7181AA | PNUSAS002251 | SRR3573820     | 2016 | 4  |  | North America | United States  | Enteritidis             | Enteritidis | 1425  | 41660 |
| SAL_FA7182AA | PNUSAS002250 | SRR3573799     | 2016 | 4  |  | North America | United States  | Enteritidis             | Enteritidis | 1425  | 40209 |
| SAL_FA7183AA | PNUSAS002249 | SRR3573778     | 2016 | 4  |  | North America | United States  | Enteritidis             | Enteritidis | 1425  | 40208 |
| SAL_FA7184AA | PNUSAS002247 | SRR3573700     | 2016 | 4  |  | North America | United States  | Enteritidis             | Enteritidis | 1425  | 41658 |
| SAL_FA7185AA | PNUSAS002246 | SRR3573696     |      |    |  | North America | United States  | Enteritidis (Predicted) | Enteritidis | 1425  | 41659 |
| SAL_FA7186AA | PNUSAS002194 | SRR3573618     | 2016 | 4  |  | North America | United States  | Enteritidis             | Enteritidis | 1425  | 447   |
| SAL_FA7187AA | PNUSAS002245 | SRR3573617     |      |    |  | North America | United States  | Enteritidis (Predicted) | Enteritidis | 1425  | 41658 |
| SAL_FA7188AA | PNUSAS002244 | SRR3573595     |      |    |  | North America | United States  | Enteritidis (Predicted) | Enteritidis | 1425  | 40177 |
| SAL_FA7189AA | PNUSAS002243 | SRR3573518     |      |    |  | North America | United States  | Enteritidis (Predicted) | Enteritidis | 1425  | 36675 |
| SAL_FA7227AA | PNUSAS002107 | SRR3572568     | 2016 | 3  |  | North America | United States  | Enteritidis             | Enteritidis | 1425  | 40224 |
| SAL_FA7300AA | MS150314     | traces-0bQoJsY | 2015 |    |  | Europe        | Ireland        | Enteritidis             | Enteritidis | 1425  | 40252 |
| SAL_FA7301AA | MS150319     | traces-OrxwIPL | 2015 |    |  | Europe        | Ireland        | Enteritidis             | Enteritidis | 1425  | 40251 |
| SAL_FA7303AA | MS150321     | traces-0OCzqNk | 2015 |    |  | Europe        | Ireland        | Enteritidis             | Enteritidis | 1425  | 25188 |
| SAL_FA7312AA | 110976       | SRR3585376     | 2015 | 5  |  | 11 Europe     | United Kingdom | Enteritidis             | Enteritidis | 1425  | 2345  |
| SAL_FA7313AA | 168519       | SRR3585375     | 2015 | 9  |  | 25 Europe     | United Kingdom | Enteritidis             | Enteritidis | 1425  | 40270 |
| SAL_FA7314AA | 185894       | SRR3585367     | 2015 | 11 |  | 11 Europe     | United Kingdom | Enteritidis             | Enteritidis | 38719 | 40269 |
| SAL_FA7315AA | 190569       | SRR3585365     | 2015 | 11 |  | 24 Europe     | United Kingdom | Enteritidis             | Enteritidis | 38773 | 40268 |
| SAL_FA7316AA | 183605       | SRR3585364     | 2015 | 11 |  | 2 Europe      | United Kingdom | Enteritidis             | Enteritidis | 1425  | 40267 |
| SAL_FA7317AA | 178732       | SRR3585363     | 2015 | 10 |  | 13 Europe     | United Kingdom | Enteritidis             | Enteritidis | 1425  | 40266 |
| SAL_FA7319AA | 160806       | SRR3585360     | 2015 | 9  |  | 10 Europe     | United Kingdom | Enteritidis             | Enteritidis | 1425  | 40264 |
| SAL_FA7320AA | 160846       | SRR3585359     | 2015 | 9  |  | 14 Europe     | United Kingdom | Enteritidis             | Enteritidis | 1425  | 40263 |
| SAL_FA7321AA | 153189       | SRR3585358     | 2015 | 8  |  | 27 Europe     | United Kingdom | Enteritidis             | Enteritidis | 1425  | 40262 |
| SAL_FA7322AA | 120578       | SRR3585357     | 2015 | 6  |  | 2 Europe      | United Kingdom | Enteritidis             | Enteritidis | 1425  | 40261 |
| SAL_FA7323AA | 154869       | SRR3585356     | 2015 | 9  |  | 1 Europe      | United Kingdom | Enteritidis             | Enteritidis | 1425  | 40260 |
| SAL_FA7324AA | 179844       | SRR3585355     | 2015 | 10 |  | 23 Europe     | United Kingdom | Enteritidis             | Enteritidis | 26775 | 40259 |
| SAL_FA7325AA | 137147       | SRR3585354     | 2015 | 7  |  | 23 Europe     | United Kingdom | Enteritidis             | Enteritidis | 1425  | 40258 |
| SAL_FA7326AA | 134034       | SRR3585352     | 2015 | 7  |  | 8 Europe      | United Kingdom | Enteritidis             | Enteritidis | 1425  | 40257 |
| SAL_FA7327AA | 164715       | SRR3585351     | 2015 | 9  |  | 21 Europe     | United Kingdom | Enteritidis             | Enteritidis | 1425  | 40256 |
| SAL_FA7329AA | 152413       | SRR3585348     | 2015 | 8  |  | 25 Europe     | United Kingdom | Enteritidis             | Enteritidis | 37741 | 40254 |
| SAL_FA7330AA | 143553       | SRR3585347     | 2015 | 8  |  | 10 Europe     | United Kingdom | Enteritidis             | Enteritidis | 1425  | 40253 |
| SAL_FA7342AA | PNUSAS000838 | SRR3593758     | 2015 | 8  |  | North America | United States  | Poona                   | Enteritidis | 1425  | 40306 |
| SAL_FA7358AA | PNUSAS002289 | SRR3593742     |      |    |  | North America | United States  | Enteritidis (Predicted) | Enteritidis | 1425  | 40291 |
| SAL_FA7359AA | PNUSAS002272 | SRR3593741     | 2016 | 4  |  | North America | United States  | Enteritidis             | Enteritidis | 1425  | 40290 |
| SAL_FA7360AA | PNUSAS002271 | SRR3593680     | 2016 | 4  |  | North America | United States  | Enteritidis             | Enteritidis | 1425  | 40289 |
| SAL_FA7431AA | CFSAN050983  | SRR3606935     | 2016 | 5  |  | North America | United States  | Enteritidis             | Enteritidis | 1425  | 40426 |
| SAL_FA7432AA | CFSAN051204  | SRR3606934     | 2016 | 5  |  | North America | United States  | Enteritidis             | Enteritidis | 1425  | 40425 |
| SAL_FA7433AA | CFSAN051203  | SRR3606933     | 2016 | 5  |  | North America | United States  | Enteritidis             | Enteritidis | 1425  | 40425 |
| SAL_FA7443AA | CFSAN032618  | SRR3606913     | 2014 | 5  |  | North America | United States  | Enteritidis (Predicted) | Enteritidis | 1425  | 40416 |
| SAL_FA7451AA | CFSAN032622  | SRR3606816     | 2014 | 5  |  | North America | United States  | Enteritidis (Predicted) | Enteritidis | 1425  | 40410 |
| SAL_FA7452AA | CFSAN032640  | SRR3606815     | 2014 | 4  |  | North America | United States  | Enteritidis (Predicted) | Enteritidis | 1425  | 40405 |
| SAL_FA7453AA | CFSAN032623  | SRR3606814     | 2014 | 5  |  | North America | United States  | Enteritidis (Predicted) | Enteritidis | 1425  | 40408 |
| SAL_FA7454AA | CFSAN032641  | SRR3606813     | 2014 | 4  |  | North America | United States  | Enteritidis (Predicted) | Enteritidis | 1425  | 40405 |
| SAL_FA7456AA | CFSAN032642  | SRR3606811     | 2014 | 4  |  | North America | United States  | Enteritidis (Predicted) | Enteritidis | 1425  | 40404 |
| SAL_FA7457AA | CFSAN032625  | SRR3606810     | 2014 | 5  |  | North America | United States  | Enteritidis (Predicted) | Enteritidis | 1425  | 8869  |
| SAL_FA7469AA | CFSAN032583  | SRR3606753     | 2014 | 5  |  | North America | United States  | Enteritidis (Predicted) | Enteritidis | 1425  | 40393 |
| SAL_FA7470AA | CFSAN032584  | SRR3606752     | 2014 | 5  |  | North America | United States  | Enteritidis (Predicted) | Enteritidis | 1425  | 40392 |
| SAL_FA7473AA | CFSAN032587  | SRR3606749     | 2014 | 5  |  | North America | United States  | Enteritidis (Predicted) | Enteritidis | 1425  | 40389 |
| SAL_FA7474AA | CFSAN032588  | SRR3606748     | 2014 | 5  |  | North America | United States  | Enteritidis (Predicted) | Enteritidis | 1425  | 40388 |
| SAL_FA7479AA | CFSAN032593  | SRR3606743     | 2014 | 5  |  | North America | United States  | Enteritidis (Predicted) | Enteritidis | 1425  | 40383 |

|              |                  |            |      |    |               |               |                         |             |       |       |
|--------------|------------------|------------|------|----|---------------|---------------|-------------------------|-------------|-------|-------|
| SAL_FA7481AA | CFSAN032595      | SRR3606740 | 2014 | 5  | North America | United States | Enteritidis (Predicted) | Enteritidis | 1425  | 40381 |
| SAL_FA7483AA | CFSAN032597      | SRR3606738 | 2014 | 5  | North America | United States | Enteritidis (Predicted) | Enteritidis | 1425  | 40379 |
| SAL_FA7488AA | CFSAN032602      | SRR3606732 | 2014 | 5  | North America | United States | Enteritidis (Predicted) | Enteritidis | 27901 | 40375 |
| SAL_FA7489AA | CFSAN032606      | SRR3606731 | 2014 | 5  | North America | United States | Enteritidis (Predicted) | Enteritidis | 1425  | 40373 |
| SAL_FA7498AA | CFSAN035328      | SRR3606722 | 2015 | 6  | North America | United States | Enteritidis (Predicted) | Enteritidis | 1425  | 40364 |
| SAL_FA7509AA | CVM-N28729       | SRR3606699 | 2010 |    | North America | United States | Enteritidis             | Enteritidis | 1425  | 40356 |
| SAL_FA7589AA | FSIS1606696      | SRR3618595 | 2016 |    | North America | United States | Enteritidis             | Enteritidis | 1425  | 41619 |
| SAL_FA7611AA | E2016007564      | SRR3634484 | 2016 | 5  | North America | United States | Enteritidis             | Enteritidis | 1425  | 40487 |
| SAL_FA7612AA | E2016007407      | SRR3622483 | 2016 | 4  | North America | United States | Enteritidis             | Enteritidis | 37741 | 40486 |
| SAL_FA7641AA | CFSAN031222      | SRR3622957 | 2014 | 5  | North America | United States | Enteritidis (Predicted) | Enteritidis | 1425  | 40520 |
| SAL_FA7651AA | CFSAN031232      | SRR3622941 | 2014 | 5  | North America | United States | Enteritidis (Predicted) | Enteritidis | 38857 | 40510 |
| SAL_FA7652AA | CFSAN031233      | SRR3622940 | 2014 | 5  | North America | United States | Enteritidis (Predicted) | Enteritidis | 1425  | 40509 |
| SAL_FA7654AA | CFSAN031235      | SRR3622938 | 2014 | 5  | North America | United States | Enteritidis (Predicted) | Enteritidis | 1425  | 40507 |
| SAL_FA7664AA | CFSAN031245      | SRR3622928 | 2014 | 5  | North America | United States | Enteritidis (Predicted) | Enteritidis | 1425  | 40498 |
| SAL_FA7699AA | PNUSAS002346     | SRR3632932 | 2016 | 4  | North America | United States | Enteritidis             | Enteritidis | 1425  | 40563 |
| SAL_FA7705AA | I2016007658      | SRR3634510 | 2016 | 5  | North America | United States | Enteritidis             | Enteritidis | 1425  | 40641 |
| SAL_FA7706AA | I2016007594      | SRR3634509 | 2016 | 5  | North America | United States | Enteritidis             | Enteritidis | 26493 | 40640 |
| SAL_FA7707AA | I2016007589      | SRR3634508 | 2016 | 5  | North America | United States | Enteritidis             | Enteritidis | 1425  | 40639 |
| SAL_FA7708AA | E2016008135      | SRR3634506 | 2016 | 5  | North America | United States | Enteritidis             | Enteritidis | 1425  | 40592 |
| SAL_FA7709AA | E2016007926      | SRR3634505 | 2016 | 5  | North America | United States | Enteritidis             | Enteritidis | 1425  | 40591 |
| SAL_FA7710AA | ADRD_L_ISUVDL19  | SRR3634504 | 2010 |    | North America | United States | Enteritidis (Predicted) | Enteritidis | 1425  | 40590 |
| SAL_FA7711AA | ADRD_L_ISUVDL18  | SRR3634503 | 2010 |    | North America | United States | Enteritidis (Predicted) | Enteritidis | 8116  | 40638 |
| SAL_FA7712AA | ADRD_L2011011290 | SRR3634502 | 2011 | 4  | North America | United States | Enteritidis (Predicted) | Enteritidis | 1425  | 40637 |
| SAL_FA7713AA | ADRD_L2010037089 | SRR3634501 | 2010 | 12 | North America | United States | Enteritidis (Predicted) | Enteritidis | 1425  | 40586 |
| SAL_FA7714AA | ADRD_L2010034399 | SRR3634499 | 2010 | 11 | North America | United States | Enteritidis (Predicted) | Enteritidis | 1425  | 40585 |
| SAL_FA7715AA | ADRD_L2010034164 | SRR3634498 | 2010 | 11 | North America | United States | Enteritidis (Predicted) | Enteritidis | 1425  | 40584 |
| SAL_FA7716AA | ADRD_L2010034161 | SRR3634497 | 2010 | 11 | North America | United States | Enteritidis (Predicted) | Enteritidis | 1425  | 40583 |
| SAL_FA7717AA | ADRD_L2010034159 | SRR3634496 | 2010 | 11 | North America | United States | Enteritidis (Predicted) | Enteritidis | 1425  | 40582 |
| SAL_FA7718AA | ADRD_L2010032613 | SRR3634494 | 2010 | 11 | North America | United States | Enteritidis (Predicted) | Enteritidis | 1425  | 40581 |
| SAL_FA7719AA | ADRD_L2010031844 | SRR3634493 | 2010 | 11 | North America | United States | Enteritidis (Predicted) | Enteritidis | 1425  | 40636 |
| SAL_FA7720AA | ADRD_L2010013903 | SRR3634492 | 2010 | 5  | North America | United States | Enteritidis (Predicted) | Enteritidis | 1425  | 40635 |
| SAL_FA7721AA | ADRD_L2010013410 | SRR3634491 | 2010 | 5  | North America | United States | Enteritidis (Predicted) | Enteritidis | 1425  | 40634 |
| SAL_FA7722AA | ADRD_L2010013409 | SRR3634489 | 2010 | 5  | North America | United States | Enteritidis (Predicted) | Enteritidis | 1425  | 12129 |
| SAL_FA7723AA | ADRD_L2010013408 | SRR3634488 | 2010 | 5  | North America | United States | Enteritidis (Predicted) | Enteritidis | 1425  | 12116 |
| SAL_FA7724AA | ADRD_L2010011928 | SRR3634487 | 2010 | 4  | North America | United States | Enteritidis (Predicted) | Enteritidis | 1425  | 40580 |
| SAL_FA7725AA | ADRD_L2010011927 | SRR3634486 | 2010 | 4  | North America | United States | Enteritidis (Predicted) | Enteritidis | 1425  | 40579 |
| SAL_FA7752AA | PNUSAS002414     | SRR3642947 | 2016 | 4  | North America | United States | Enteritidis             | Enteritidis | 1425  | 40608 |
| SAL_FA7753AA | PNUSAS002413     | SRR3642946 | 2016 | 4  | North America | United States | Enteritidis             | Enteritidis | 1425  | 40609 |
| SAL_FA7759AA | PNUSAS002351     | SRR3642938 | 2016 | 2  | North America | United States | Enteritidis             | Enteritidis | 1425  | 40603 |
| SAL_FA7763AA | FDA00003652      | SRR3641795 | 2012 | 5  | North America | United States | Enteritidis             | Enteritidis | 1425  | 40600 |
| SAL_FA7764AA | FDA00003653      | SRR3641794 | 2012 | 5  | North America | United States | Enteritidis             | Enteritidis | 1425  | 40623 |
| SAL_FA7765AA | FDA00003654      | SRR3641793 | 2012 | 5  | North America | United States | Enteritidis             | Enteritidis | 1425  | 40622 |
| SAL_FA7766AA | FDA00003655      | SRR3641792 | 2012 | 5  | North America | United States | Enteritidis             | Enteritidis | 1425  | 40599 |
| SAL_FA7767AA | FDA00003656      | SRR3641791 | 2012 | 5  | North America | United States | Enteritidis             | Enteritidis | 1425  | 40598 |
| SAL_FA7768AA | FDA00003657      | SRR3641790 | 2012 | 5  | North America | United States | Enteritidis             | Enteritidis | 1425  | 40597 |
| SAL_FA7769AA | FDA00003658      | SRR3641789 | 2012 | 5  | North America | United States | Enteritidis             | Enteritidis | 1425  | 40593 |
| SAL_FA7770AA | FDA00003659      | SRR3641788 | 2012 | 5  | North America | United States | Enteritidis             | Enteritidis | 1425  | 40596 |
| SAL_FA7771AA | FDA00003660      | SRR3641787 | 2012 | 5  | North America | United States | Enteritidis             | Enteritidis | 1425  | 40595 |
| SAL_FA7772AA | FDA00003661      | SRR3641777 | 2012 | 5  | North America | United States | Enteritidis             | Enteritidis | 1425  | 40594 |
| SAL_FA7773AA | FDA00003662      | SRR3641776 | 2012 | 5  | North America | United States | Enteritidis             | Enteritidis | 1425  | 40593 |
| SAL_FA7774AA | FDA00003663      | SRR3641775 | 2012 | 5  | North America | United States | Enteritidis             | Enteritidis | 1425  | 40588 |
| SAL_FA7781AA | FDA00002085      | SRR3647313 | 2004 | 5  | North America | United States | Enteritidis             | Enteritidis | 1425  | 40657 |
| SAL_FA7782AA | FDA00002082      | SRR3647312 | 2004 | 5  | North America | United States | Enteritidis             | Enteritidis | 1425  | 40656 |
| SAL_FA7783AA | FDA00000050      | SRR3647311 | 2001 | 4  | North America | United States | Enteritidis             | Enteritidis | 1425  | 40657 |
| SAL_FA7794AA | ADRD_L_ISUVDL21  | SRR3649689 | 2010 |    | North America | United States | Enteritidis (Predicted) | Enteritidis | 8116  | 40679 |
| SAL_FA7795AA | ADRD_L_ISUVDL20  | SRR3649688 | 2010 |    | North America | United States | Enteritidis (Predicted) | Enteritidis | 1425  | 40678 |
| SAL_FA7818AA | ADRD_L2010015944 | SRR3649720 | 2010 | 6  | North America | United States | Enteritidis (Predicted) | Enteritidis | 1425  | 40695 |
| SAL_FA7819AA | ADRD_L2010015727 | SRR3649719 | 2010 | 5  | North America | United States | Enteritidis (Predicted) | Enteritidis | 1425  | 40694 |
| SAL_FA7820AA | ADRD_L2010014849 | SRR3649718 | 2010 | 5  | North America | United States | Enteritidis (Predicted) | Enteritidis | 1425  | 40693 |

|              |                |            |      |   |               |               |                         |             |       |       |
|--------------|----------------|------------|------|---|---------------|---------------|-------------------------|-------------|-------|-------|
| SAL_FA7821AA | ADRD2010014806 | SRR3649703 | 2010 | 5 | North America | United States | Enteritidis (Predicted) | Enteritidis | 1425  | 40692 |
| SAL_FA7822AA | ADRD2010014848 | SRR3649702 | 2010 | 5 | North America | United States | Enteritidis (Predicted) | Enteritidis | 1425  | 40691 |
| SAL_FA7823AA | ADRD2010014360 | SRR3649701 | 2010 | 5 | North America | United States | Enteritidis (Predicted) | Enteritidis | 1425  | 40690 |
| SAL_FA7824AA | ADRD2010014357 | SRR3649700 | 2010 | 5 | North America | United States | Enteritidis (Predicted) | Enteritidis | -6845 | 40689 |
| SAL_FA7825AA | ADRD2010017460 | SRR3649699 | 2010 | 6 | North America | United States | Enteritidis (Predicted) | Enteritidis | 1425  | 40688 |
| SAL_FA7826AA | ADRD2010016499 | SRR3649698 | 2010 | 6 | North America | United States | Enteritidis (Predicted) | Enteritidis | 1425  | 40684 |
| SAL_FA7827AA | ADRD2012001037 | SRR3649697 | 2012 | 1 | North America | United States | Enteritidis (Predicted) | Enteritidis | 1425  | 40683 |
| SAL_FA7829AA | ADRD2012028707 | SRR3649693 | 2012 | 8 | North America | United States | Enteritidis (Predicted) | Enteritidis | -6844 | 40681 |
| SAL_FA7830AA | ADRD2011030426 | SRR3649692 | 2011 | 9 | North America | United States | Enteritidis (Predicted) | Enteritidis | 1425  | 40680 |
| SAL_FA7859AA | I2016008288-1  | SRR3743173 | 2016 | 6 | North America | United States | Enteritidis             | Enteritidis | 1425  | 40732 |
| SAL_FA7860AA | I2016008251-1  | SRR3743174 | 2016 | 5 | North America | United States | Enteritidis             | Enteritidis | 1425  | 40728 |
| SAL_FA7861AA | I2016008250-2  | SRR3696038 | 2016 | 5 | North America | United States | Enteritidis             | Enteritidis | 1425  | 40731 |
| SAL_FA7862AA | I2016007916    | SRR3696037 | 2016 | 5 | North America | United States | Enteritidis             | Enteritidis | 1425  | 40730 |
| SAL_FA7863AA | E2016008572    | SRR3696036 | 2016 | 6 | North America | United States | Enteritidis             | Enteritidis | 1425  | 40729 |
| SAL_FA7864AA | E2016008452    | SRR3674946 | 2016 | 5 | North America | United States | Enteritidis             | Enteritidis | 1425  | 40728 |
| SAL_FA7865AA | E2016008445    | SRR3660530 | 2016 | 6 | North America | United States | Enteritidis             | Enteritidis | 1425  | 40727 |
| SAL_FA7866AA | E2016008278    | SRR3660529 | 2016 | 5 | North America | United States | Enteritidis             | Enteritidis | 1425  | 40726 |
| SAL_FA7867AA | E2016008277    | SRR3660528 | 2016 | 5 | North America | United States | Enteritidis             | Enteritidis | 1425  | 40725 |
| SAL_FA7868AA | E2016008276    | SRR3660527 | 2016 | 5 | North America | United States | Enteritidis             | Enteritidis | 1425  | 40724 |
| SAL_FA7869AA | E2016008275    | SRR3660151 | 2016 | 5 | North America | United States | Enteritidis             | Enteritidis | 1425  | 40724 |
| SAL_FA7870AA | E2016008274    | SRR3660150 | 2016 | 5 | North America | United States | Enteritidis             | Enteritidis | 1425  | 40724 |
| SAL_FA7871AA | E2016008273    | SRR3660149 | 2016 | 5 | North America | United States | Enteritidis             | Enteritidis | 1425  | 40724 |
| SAL_FA7872AA | E2016008211    | SRR3660132 | 2016 | 5 | North America | United States | Enteritidis             | Enteritidis | 37741 | 40723 |
| SAL_FA7873AA | E2016008173    | SRR3696018 | 2016 | 5 | North America | United States | Enteritidis             | Enteritidis | 1425  | 40722 |
| SAL_FA7874AA | E2016008169-1  | SRR3660130 | 2016 | 5 | North America | United States | Enteritidis             | Enteritidis | 1425  | 40721 |
| SAL_FA7876AA | FDA00003644    | SRR3659834 | 2012 | 5 | North America | United States | Enteritidis             | Enteritidis | 1425  | 40593 |
| SAL_FA7877AA | FDA00003646    | SRR3659833 | 2012 | 5 | North America | United States | Enteritidis             | Enteritidis | -6847 | 40719 |
| SAL_FA7878AA | FDA00003647    | SRR3659832 | 2012 | 5 | North America | United States | Enteritidis             | Enteritidis | 1425  | 40718 |
| SAL_FA7879AA | FDA00003648    | SRR3659474 | 2012 | 5 | North America | United States | Enteritidis             | Enteritidis | 1425  | 40717 |
| SAL_FA7880AA | FDA00003649    | SRR3659473 | 2012 | 5 | North America | United States | Enteritidis             | Enteritidis | 1425  | 40593 |
| SAL_FA7881AA | FDA00003650    | SRR3659472 | 2012 | 5 | North America | United States | Enteritidis             | Enteritidis | 1425  | 40716 |
| SAL_FA7882AA | FDA00003651    | SRR3659471 | 2012 | 5 | North America | United States | Enteritidis             | Enteritidis | 1425  | 40715 |
| SAL_FA7884AA | FSIS1606784    | SRR3667097 | 2016 |   | North America | United States | Enteritidis             | Enteritidis | 1425  | 40764 |
| SAL_FA7920AA | 15MN00053      | SRR3662623 | 2015 | 1 | North America | United States | Enteritidis             | Enteritidis | 1425  | 40743 |
| SAL_FA7927AA | PNUSA5002388   | SRR3667941 | 2016 | 5 | North America | United States | Enteritidis             | Enteritidis | 1425  | 40808 |
| SAL_FA7929AA | PNUSA5002386   | SRR3667939 |      |   | North America | United States | Enteritidis (Predicted) | Enteritidis | 1425  | 40808 |
| SAL_FA7930AA | PNUSA5002385   | SRR3667938 |      |   | North America | United States | Enteritidis (Predicted) | Enteritidis | 1425  | 40808 |
| SAL_FA7931AA | PNUSA5002376   | SRR3667937 | 2016 | 5 | North America | United States | Enteritidis             | Enteritidis | 1425  | 40609 |
| SAL_FA7944AA | PNUSA5002472   | SRR3667924 | 2016 | 4 | North America | United States | Enteritidis             | Enteritidis | 1425  | 40802 |
| SAL_FA7945AA | PNUSA5002471   | SRR3667923 | 2016 | 4 | North America | United States | Enteritidis             | Enteritidis | 1425  | 40801 |
| SAL_FA7946AA | PNUSA5002470   | SRR3667901 | 2016 | 3 | North America | United States | Enteritidis             | Enteritidis | 1425  | 180   |
| SAL_FA7947AA | PNUSA5002469   | SRR3667900 | 2016 | 3 | North America | United States | Enteritidis             | Enteritidis | 1425  | 40800 |
| SAL_FA7949AA | PNUSA5002452   | SRR3667858 | 2016 | 5 | North America | United States | Enteritidis             | Enteritidis | 1425  | 40798 |
| SAL_FA7955AA | PNUSA5002446   | SRR3667851 | 2016 | 4 | North America | United States | Enteritidis             | Enteritidis | 1425  | 180   |
| SAL_FA7974AA | 2016K-0430     | SRR3667831 |      |   | North America | United States | Enteritidis (Predicted) | Enteritidis | 1425  | 40787 |
| SAL_FA7976AA | 2016K-0436     | SRR3667829 |      |   | North America | United States | Enteritidis (Predicted) | Enteritidis | 27863 | 40785 |
| SAL_FA7979AA | 2016K-0440     | SRR3667826 |      |   | North America | United States | Enteritidis (Predicted) | Enteritidis | 27863 | 40225 |
| SAL_FA7980AA | 2016K-0431     | SRR3667825 |      |   | North America | United States | Enteritidis (Predicted) | Enteritidis | 1425  | 40784 |
| SAL_FA7982AA | 2016K-0435     | SRR3667823 |      |   | North America | United States | Enteritidis (Predicted) | Enteritidis | 1425  | 40782 |
| SAL_FA7983AA | 2016K-0429     | SRR3667822 |      |   | North America | United States | Enteritidis (Predicted) | Enteritidis | 27863 | 40783 |
| SAL_FA7984AA | 2016K-0432     | SRR3667821 |      |   | North America | United States | Enteritidis (Predicted) | Enteritidis | 1425  | 39779 |
| SAL_FA7988AA | 2016K-0427     | SRR3667817 |      |   | North America | United States | Enteritidis (Predicted) | Enteritidis | 1425  | 180   |
| SAL_FA7990AA | 2016K-0422     | SRR3667815 |      |   | North America | United States | Enteritidis (Predicted) | Enteritidis | 1425  | 180   |
| SAL_FA7991AA | 2016K-0423     | SRR3667814 |      |   | North America | United States | Enteritidis (Predicted) | Enteritidis | 37133 | 177   |
| SAL_FA8012AA | 2013AM-0984    | SRR3676331 |      |   | North America | United States | Enteritidis (Predicted) | Enteritidis | 28412 | 40874 |
| SAL_FA8024AA | E2016008184    | SRR3696033 | 2016 | 5 | North America | United States | Enteritidis             | Enteritidis | 1425  | 40865 |
| SAL_FA8027AA | ADRD2011019869 | SRR3674699 | 2011 | 6 | North America | United States | Enteritidis (Predicted) | Enteritidis | 1425  | 40862 |
| SAL_FA8028AA | ADRD2011012612 | SRR3674685 | 2011 | 4 | North America | United States | Enteritidis (Predicted) | Enteritidis | 1425  | 40868 |
| SAL_FA8029AA | ADRD2011010185 | SRR3674684 | 2011 | 3 | North America | United States | Enteritidis (Predicted) | Enteritidis | 1425  | 40861 |



|              |                |            |      |    |               |               |                         |             |       |       |
|--------------|----------------|------------|------|----|---------------|---------------|-------------------------|-------------|-------|-------|
| SAL_FA8030AA | ADRD2010029485 | SRR3674673 | 2010 | 10 | North America | United States | Enteritidis (Predicted) | Enteritidis | 1425  | 40860 |
| SAL_FA8031AA | ADRD2010025661 | SRR3674672 | 2010 | 9  | North America | United States | Enteritidis (Predicted) | Enteritidis | 1425  | 40859 |
| SAL_FA8032AA | ADRD2010023741 | SRR3674666 | 2010 | 8  | North America | United States | Enteritidis (Predicted) | Enteritidis | 1425  | 40858 |
| SAL_FA8033AA | ADRD2010023513 | SRR3674665 | 2010 | 8  | North America | United States | Enteritidis (Predicted) | Enteritidis | 1425  | 40857 |
| SAL_FA8034AA | ADRD2010023423 | SRR3674664 | 2010 | 8  | North America | United States | Enteritidis (Predicted) | Enteritidis | 1425  | 40856 |
| SAL_FA8035AA | ADRD2010023411 | SRR3674663 | 2010 | 8  | North America | United States | Enteritidis (Predicted) | Enteritidis | 1425  | 12124 |
| SAL_FA8036AA | ADRD2010023303 | SRR3674662 | 2010 | 8  | North America | United States | Enteritidis (Predicted) | Enteritidis | 1425  | 40855 |
| SAL_FA8053AA | PNUSA5002445   | SRR3670104 |      |    | North America | United States | Enteritidis (Predicted) | Enteritidis | 1425  | 40842 |
| SAL_FA8059AA | PNUSA5002486   | SRR3669929 | 2016 | 5  | North America | United States | Enteritidis             | Enteritidis | 1425  | 40837 |
| SAL_FA8060AA | PNUSA5002485   | SRR3669928 | 2016 | 5  | North America | United States | Enteritidis             | Enteritidis | 1425  | 40837 |
| SAL_FA8061AA | PNUSA5002484   | SRR3669925 | 2016 | 5  | North America | United States | Enteritidis             | Enteritidis | 1425  | 40836 |
| SAL_FA8062AA | PNUSA5002248   | SRR3669924 | 2016 | 4  | North America | United States | Enteritidis             | Enteritidis | 1425  | 40835 |
| SAL_FA8113AA | 2016K-0494     | SRR3708005 |      |    | North America | United States | Enteritidis (Predicted) | Enteritidis | 27863 | 40917 |
| SAL_FA8114AA | 2016K-0470     | SRR3708004 |      |    | North America | United States | Enteritidis (Predicted) | Enteritidis | 27863 | 40225 |
| SAL_FA8119AA | 2016K-0467     | SRR3707999 |      |    | North America | United States | Enteritidis (Predicted) | Enteritidis | 37133 | 177   |
| SAL_FA8122AA | CFSAN048079    | SRR3707431 | 2015 | 9  | North America | United States | Enteritidis (Predicted) | Enteritidis | 1425  | 40912 |
| SAL_FA8127AA | I2016008677    | SRR3707421 | 2016 | 6  | North America | United States | Enteritidis             | Enteritidis | 1425  | 40905 |
| SAL_FA8128AA | E2016008726    | SRR3707420 | 2016 | 6  | North America | United States | Enteritidis             | Enteritidis | 1425  | 40909 |
| SAL_FA8129AA | E2016008707    | SRR3707419 | 2016 | 6  | North America | United States | Enteritidis             | Enteritidis | 1425  | 40904 |
| SAL_FA8130AA | I2016008661    | SRR3707418 | 2016 | 6  | North America | United States | Enteritidis             | Enteritidis | 1425  | 40903 |
| SAL_FA8131AA | E2016008453    | SRR3707417 | 2016 | 6  | North America | United States | Enteritidis             | Enteritidis | 1425  | 40916 |
| SAL_FA8139AA | FSIS1606888    | SRR3710249 | 2016 |    | North America | United States | Enteritidis             | Enteritidis | 1425  | 40922 |
| SAL_FA8144AA | FSIS1606877    | SRR3710223 | 2016 |    | North America | United States | Enteritidis             | Enteritidis | 1425  | 36028 |
| SAL_FA8122AA | PNUSA5002542   | SRR3713627 | 2016 | 5  | North America | United States | Enteritidis             | Enteritidis | 1425  | 6087  |
| SAL_FA8206AA | FDA00003941    | SRR3721547 | 2011 | 9  | Asia          | China         | Enteritidis             | Enteritidis | 1425  | 41510 |
| SAL_FA8212AA | CFSAN051893    | SRR3721487 | 2016 | 6  | North America | United States | Enteritidis             | Enteritidis | 1425  | 41535 |
| SAL_FA8213AA | CFSAN051896    | SRR3721486 | 2016 | 6  | North America | United States | Enteritidis (Predicted) | Enteritidis | 1425  | 41534 |
| SAL_FA8216AA | E2016009047    | SRR3721482 | 2016 | 6  | North America | United States | Enteritidis             | Enteritidis | 1425  | 41531 |
| SAL_FA8221AA | ARIM-SE1258-05 | SRR3721476 | 2005 | 5  | South America | Argentina     | Enteritidis             | Enteritidis | 1425  | 41526 |
| SAL_FA8381AA | PNUSA5002541   | SRR3713626 | 2016 | 5  | North America | United States | Enteritidis             | Enteritidis | 1425  | 6087  |
| SAL_FA8389AA | PNUSA5002488   | SRR3713617 |      |    | North America | United States | Enteritidis (Predicted) | Enteritidis | 27863 | 47457 |
| SAL_FA8393AA | PNUSA5002504   | SRR3713613 | 2016 | 5  | North America | United States | Enteritidis             | Enteritidis | 1425  | 47454 |
| SAL_FA8394AA | PNUSA5002503   | SRR3713612 | 2016 | 5  | North America | United States | Enteritidis             | Enteritidis | 1425  | 47448 |
| SAL_FA8395AA | PNUSA5002502   | SRR3713611 | 2016 | 5  | North America | United States | Enteritidis             | Enteritidis | 1425  | 47453 |
| SAL_FA8396AA | PNUSA5002501   | SRR3713610 | 2016 | 5  | North America | United States | Enteritidis             | Enteritidis | 1425  | 47452 |
| SAL_FA8397AA | PNUSA5002483   | SRR3713608 | 2016 | 5  | North America | United States | Enteritidis             | Enteritidis | 1425  | 180   |
| SAL_FA8398AA | PNUSA5002482   | SRR3713607 | 2016 | 5  | North America | United States | Enteritidis             | Enteritidis | 1425  | 180   |
| SAL_FA8399AA | PNUSA5002481   | SRR3713606 |      |    | North America | United States | Enteritidis (Predicted) | Enteritidis | 37133 | 47451 |
| SAL_FA8400AA | PNUSA5002480   | SRR3713605 | 2016 | 5  | North America | United States | Enteritidis             | Enteritidis | 1425  | 47450 |
| SAL_FA8401AA | PNUSA5002479   | SRR3713604 | 2016 | 5  | North America | United States | Enteritidis             | Enteritidis | 1425  | 47449 |
| SAL_FA8402AA | PNUSA5002500   | SRR3713603 | 2016 | 5  | North America | United States | Enteritidis             | Enteritidis | 1425  | 47448 |
| SAL_FA8405AA | PNUSA5002522   | SRR3713600 | 2016 | 5  | North America | United States | Enteritidis             | Enteritidis | 1425  | 1026  |
| SAL_FA8411AA | PNUSA5002496   | SRR3713594 | 2016 | 4  | North America | United States | Enteritidis             | Enteritidis | 1425  | 47440 |
| SAL_FA8425AA | PNUSA5002521   | SRR3713567 | 2016 | 5  | North America | United States | Enteritidis             | Enteritidis | 1425  | 47428 |
| SAL_FA8459AA | FSIS1606833    | SRR3710738 | 2016 |    | North America | United States | Enteritidis             | Enteritidis | 1425  | 41754 |
| SAL_FA8474AA | PNUSA5002222   | SRR3732324 | 2016 | 4  | North America | United States | Enteritidis             | Enteritidis | 1425  | 47396 |
| SAL_FA8475AA | PNUSA5002221   | SRR3680154 | 2016 | 4  | North America | United States | Enteritidis             | Enteritidis | 1425  | 180   |
| SAL_FA8483AA | PNUSA5002378   | SRR3732328 | 2016 | 5  | North America | United States | Enteritidis             | Enteritidis | 1425  | 41758 |
| SAL_FA8484AA | PNUSA5002377   | SRR3732327 | 2016 | 5  | North America | United States | Enteritidis             | Enteritidis | 1425  | 40609 |
| SAL_FA8485AA | PNUSA5002375   | SRR3680143 |      |    | North America | United States | Enteritidis             | Enteritidis | 1425  | 47389 |
| SAL_FA8486AA | PNUSA5002374   | SRR3732314 | 2016 | 4  | North America | United States | Enteritidis             | Enteritidis | 1425  | 47388 |
| SAL_FA8503AA | CVM N38233     | SRR3665310 | 2011 |    | North America | United States | Enteritidis             | Enteritidis | 1425  | 47372 |
| SAL_FA8513AA | CVM N37947     | SRR3665300 | 2011 |    | North America | United States | Enteritidis             | Enteritidis | 1425  | 47363 |
| SAL_FA8524AA | CVM N37936     | SRR3665289 | 2011 |    | North America | United States | Enteritidis             | Enteritidis | 1425  | 47354 |
| SAL_FA8525AA | CVM N37935     | SRR3665288 | 2011 |    | North America | United States | Typhimurium             | Enteritidis | 1425  | 47353 |
| SAL_FA8536AA | CVM N37924     | SRR3665277 | 2011 |    | North America | United States | Enteritidis             | Enteritidis | 1425  | 47342 |
| SAL_FA8541AA | CVM N37919     | SRR3665272 | 2011 |    | North America | United States | Kentucky                | Enteritidis | 1425  | 47337 |
| SAL_FA8551AA | CVM N37909     | SRR3665262 | 2011 |    | North America | United States | Enteritidis             | Enteritidis | 42202 | 47329 |
| SAL_FA8556AA | CVM N37904     | SRR3665257 | 2011 |    | North America | United States | Enteritidis             | Enteritidis | 1425  | 47324 |

|              |                |            |      |   |               |               |                         |             |      |       |
|--------------|----------------|------------|------|---|---------------|---------------|-------------------------|-------------|------|-------|
| SAL_FA8558AA | CVM N37902     | SRR3665255 | 2011 |   | North America | United States | Enteritidis             | Enteritidis | 1425 | 47322 |
| SAL_FA8607AA | CVM N32752     | SRR3665206 | 2011 |   | North America | United States | Enteritidis             | Enteritidis | 1425 | 47274 |
| SAL_FA8616AA | CVM N32062     | SRR3665197 | 2011 |   | North America | United States | Enteritidis             | Enteritidis | 1425 | 47265 |
| SAL_FA8673AA | CVM N31405     | SRR3665140 | 2011 |   | North America | United States | Enteritidis             | Enteritidis | 1425 | 47211 |
| SAL_FA8681AA | CVM N31397     | SRR3665132 | 2011 |   | North America | United States | Enteritidis             | Enteritidis | 1425 | 47203 |
| SAL_FA8682AA | CVM N31396     | SRR3665131 | 2011 |   | North America | United States | Enteritidis             | Enteritidis | 1425 | 47202 |
| SAL_FA8698AA | CVM N31380     | SRR3665115 | 2011 |   | North America | United States | Enteritidis             | Enteritidis | 1425 | 47546 |
| SAL_FA8713AA | CVM N30691     | SRR3665100 | 2011 |   | North America | United States | Enteritidis             | Enteritidis | 1425 | 47187 |
| SAL_FA8729AA | CVM N30675     | SRR3665084 | 2011 |   | North America | United States | Enteritidis             | Enteritidis | 1425 | 47172 |
| SAL_FA8745AA | CVM N30659     | SRR3665068 | 2011 |   | North America | United States | Enteritidis             | Enteritidis | 1425 | 47157 |
| SAL_FA8746AA | CVM N30658     | SRR3665067 | 2011 |   | North America | United States | Enteritidis             | Enteritidis | 1425 | 47156 |
| SAL_FA8765AA | CVM N30639     | SRR3665048 | 2011 |   | North America | United States | Enteritidis             | Enteritidis | 1425 | 47137 |
| SAL_FA8769AA | CVM N29385     | SRR3665044 | 2011 |   | North America | United States | Enteritidis             | Enteritidis | 1425 | 47133 |
| SAL_FA8794AA | CVM N29358     | SRR3665019 | 2011 |   | North America | United States | Enteritidis             | Enteritidis | 1425 | 47111 |
| SAL_FA8824AA | CVM N29328     | SRR3664989 | 2011 |   | North America | United States | Enteritidis             | Enteritidis | 1425 | 47082 |
| SAL_FA8865AA | CVM N42517     | SRR3664948 | 2012 |   | North America | United States | Enteritidis             | Enteritidis | 1425 | 47002 |
| SAL_FA8866AA | CVM N42516     | SRR3664947 | 2012 |   | North America | United States | Enteritidis             | Enteritidis | 1425 | 47045 |
| SAL_FA8877AA | CVM N42504     | SRR3664936 | 2012 |   | North America | United States | Enteritidis             | Enteritidis | 1425 | 46993 |
| SAL_FA8886AA | CVM N42495     | SRR3664927 | 2012 |   | North America | United States | Enteritidis             | Enteritidis | 1425 | 46986 |
| SAL_FA8920AA | CVM N42461     | SRR3664893 | 2012 |   | North America | United States | Enteritidis             | Enteritidis | 1425 | 46953 |
| SAL_FA8942AA | CVM N42329     | SRR3664871 | 2012 |   | North America | United States | Enteritidis             | Enteritidis | 1425 | 46930 |
| SAL_FA8971AA | CVM N41912     | SRR3664842 | 2012 |   | North America | United States | Enteritidis             | Enteritidis | 1425 | 46904 |
| SAL_FA9002AA | CVM N41742     | SRR3664811 | 2012 |   | North America | United States | Enteritidis             | Enteritidis | 1425 | 14207 |
| SAL_FA9019AA | CVM N40937     | SRR3664794 | 2012 |   | North America | United States | Enteritidis             | Enteritidis | 1425 | 46854 |
| SAL_FA9024AA | CVM N40931     | SRR3664789 | 2012 |   | North America | United States | Enteritidis             | Enteritidis | 1425 | 46850 |
| SAL_FA9027AA | CVM N40928     | SRR3664786 | 2012 |   | North America | United States | Enteritidis             | Enteritidis | 1425 | 46858 |
| SAL_FA9028AA | CVM N40927     | SRR3664785 | 2012 |   | North America | United States | Enteritidis             | Enteritidis | 1425 | 46847 |
| SAL_FA9054AA | CVM N40402     | SRR3664759 | 2012 |   | North America | United States | Enteritidis             | Enteritidis | 1425 | 46825 |
| SAL_FA9056AA | CVM N40400     | SRR3664757 | 2012 |   | North America | United States | Enteritidis             | Enteritidis | 1425 | 46824 |
| SAL_FA9057AA | CVM N40399     | SRR3664756 | 2012 |   | North America | United States | liia 18:Z4,Z23:-        | Enteritidis | 1425 | 13122 |
| SAL_FA9063AA | CVM N40393     | SRR3664750 | 2012 |   | North America | United States | Enteritidis             | Enteritidis | 1425 | 46819 |
| SAL_FA9066AA | CVM N40390     | SRR3664747 | 2012 |   | North America | United States | Enteritidis             | Enteritidis | 1425 | 46816 |
| SAL_FA9067AA | CVM N40389     | SRR3664746 | 2012 |   | North America | United States | Enteritidis             | Enteritidis | 1425 | 46814 |
| SAL_FA9082AA | CVM N40372     | SRR3664731 | 2012 |   | North America | United States | I 9,12:Non-Motile       | Enteritidis | 1425 | 46455 |
| SAL_FA9104AA | CVM N39853     | SRR3664709 | 2012 |   | North America | United States | liia 18:Z4,Z23:-        | Enteritidis | 1425 | 46430 |
| SAL_FA9108AA | CVM N39849     | SRR3664705 | 2012 |   | North America | United States | Typhimurium Var. 5-     | Enteritidis | 1425 | 46427 |
| SAL_FA9140AA | CVM N38916     | SRR3664673 | 2012 |   | North America | United States | Enteritidis             | Enteritidis | 1425 | 46378 |
| SAL_FA9148AA | CVM N38908     | SRR3664665 | 2012 |   | North America | United States | Enteritidis             | Enteritidis | 1425 | 46370 |
| SAL_FA9154AA | CVM N38902     | SRR3664659 | 2012 |   | North America | United States | Enteritidis             | Enteritidis | 1425 | 46326 |
| SAL_FA9156AA | CVM N38895     | SRR3664652 | 2012 |   | North America | United States | Enteritidis             | Enteritidis | 1425 | 46324 |
| SAL_FA9179AA | CVM N38872     | SRR3664629 | 2012 |   | North America | United States | Enteritidis             | Enteritidis | 1425 | 46203 |
| SAL_FA9196AA | CVM N38854     | SRR3664612 | 2012 |   | North America | United States | Enteritidis             | Enteritidis | 1425 | 46187 |
| SAL_FA9200AA | CVM N38850     | SRR3664608 | 2012 |   | North America | United States | Enteritidis             | Enteritidis | 1425 | 46184 |
| SAL_FA9205AA | CVM N38901     | SRR3664658 | 2012 |   | North America | United States | Enteritidis             | Enteritidis | 1425 | 41766 |
| SAL_FA9207AA | CVM N38899     | SRR3664656 | 2012 |   | North America | United States | Enteritidis             | Enteritidis | 1425 | 41764 |
| SAL_FA9210AA | 0000-0058-2895 | SRR3618628 | 2016 |   | North America | United States | Enteritidis (Predicted) | Enteritidis | 1425 | 2668  |
| SAL_FA9212AA | NY64344217     | SRR3536615 | 2016 | 4 | North America | United States | Enteritidis             | Enteritidis | 1425 | 41759 |
| SAL_FA9213AA | NY64333822     | SRR3536614 | 2016 | 4 | North America | United States | Enteritidis             | Enteritidis | 1425 | 41758 |
| SAL_FA9214AA | NY64333783     | SRR3536613 | 2016 | 4 | North America | United States | Enteritidis             | Enteritidis | 1425 | 41757 |
| SAL_FA9215AA | NY64333741     | SRR3536612 | 2016 | 4 | North America | United States | Enteritidis             | Enteritidis | 1425 | 40609 |
| SAL_FA9217AA | NY64248047     | SRR3479907 | 2016 | 4 | North America | United States | Enteritidis             | Enteritidis | 1425 | 41757 |
| SAL_FA9218AA | NY64247955     | SRR3479906 | 2016 | 4 | North America | United States | Enteritidis             | Enteritidis | 1425 | 41757 |
| SAL_FA9219AA | NY64247851     | SRR3479905 | 2016 | 4 | North America | United States | Enteritidis             | Enteritidis | 1425 | 180   |
| SAL_FA9220AA | NY64247811     | SRR3479904 | 2016 | 4 | North America | United States | Enteritidis             | Enteritidis | 1425 | 46183 |
| SAL_FA9221AA | NY64247773     | SRR3479903 | 2016 | 4 | North America | United States | Enteritidis             | Enteritidis | 1425 | 46182 |
| SAL_FA9222AA | NY64247713     | SRR3479902 | 2016 | 3 | North America | United States | Enteritidis             | Enteritidis | 1425 | 41758 |
| SAL_FA9223AA | NY64247673     | SRR3479901 | 2016 | 4 | North America | United States | Enteritidis             | Enteritidis | 1425 | 46181 |
| SAL_FA9229AA | NY63966755     | SRR3457618 | 2016 | 4 | North America | United States | Enteritidis             | Enteritidis | 1425 | 46175 |
| SAL_FA9230AA | NY63966716     | SRR3457617 | 2016 | 4 | North America | United States | Enteritidis             | Enteritidis | 1425 | 46366 |

|              |                     |            |      |    |               |               |                         |             |       |       |
|--------------|---------------------|------------|------|----|---------------|---------------|-------------------------|-------------|-------|-------|
| SAL_FA9231AA | NY63966674          | SRR3457616 | 2016 | 4  | North America | United States | Enteritidis             | Enteritidis | 1425  | 41758 |
| SAL_FA9232AA | NY63966636          | SRR3457615 | 2016 | 3  | North America | United States | Enteritidis             | Enteritidis | 1425  | 41758 |
| SAL_FA9233AA | NY63966598          | SRR3457614 | 2016 | 3  | North America | United States | Enteritidis             | Enteritidis | 1425  | 4151  |
| SAL_FA9234AA | NY63966560          | SRR3457613 | 2016 | 3  | North America | United States | Enteritidis             | Enteritidis | 1425  | 40289 |
| SAL_FA9235AA | NY63966522          | SRR3457612 | 2016 | 3  | North America | United States | Enteritidis             | Enteritidis | 1425  | 46175 |
| SAL_FA9236AA | NY63966472          | SRR3457611 | 2016 | 4  | North America | United States | Enteritidis             | Enteritidis | 1425  | 46174 |
| SAL_FA9237AA | NY63966434          | SRR3457610 | 2016 | 3  | North America | United States | Enteritidis             | Enteritidis | 1425  | 41758 |
| SAL_FA9241AA | 2016K-0209          | SRR3392790 |      |    | North America | United States | Enteritidis (Predicted) | Enteritidis | 1425  | 717   |
| SAL_FA9279AA | CFSAN046997         | SRR3225393 | 2015 | 9  | North America | United States | Enteritidis (Predicted) | Enteritidis | 1425  | 4174  |
| SAL_FA9280AA | CFSAN046996         | SRR3225392 | 2015 | 9  | North America | United States | Enteritidis (Predicted) | Enteritidis | 1425  | 46143 |
| SAL_FA9306AA | AZ-TG92668          | SRR3224203 | 2015 | 9  | North America | United States | Enteritidis             | Enteritidis | 1425  | 4174  |
| SAL_FA9355AA | E2016003571         | SRR3223817 | 2016 | 3  | North America | United States | Enteritidis             | Enteritidis | 1425  | 45918 |
| SAL_FA9356AA | E2016003547         | SRR3223816 | 2016 | 3  | North America | United States | Enteritidis             | Enteritidis | 1425  | 617   |
| SAL_FA9357AA | E2016003457         | SRR3223815 | 2016 | 3  | North America | United States | Enteritidis             | Enteritidis | 1425  | 613   |
| SAL_FA9358AA | E2016003446         | SRR3223814 | 2016 | 3  | North America | United States | Enteritidis             | Enteritidis | 1425  | 45917 |
| SAL_FA9359AA | E2016003440         | SRR3223813 | 2016 | 3  | North America | United States | Enteritidis             | Enteritidis | 1425  | 45916 |
| SAL_FA9360AA | E2016003423         | SRR3223812 | 2016 | 2  | North America | United States | Enteritidis             | Enteritidis | 34197 | 45921 |
| SAL_FA9361AA | E2016003239         | SRR3223811 | 2016 | 2  | North America | United States | Enteritidis             | Enteritidis | 1425  | 45915 |
| SAL_FA9362AA | E2016003221         | SRR3223810 | 2016 | 2  | North America | United States | Enteritidis             | Enteritidis | 1425  | 617   |
| SAL_FA9363AA | E2016003179         | SRR3223809 | 2016 | 2  | North America | United States | Enteritidis             | Enteritidis | 1425  | 45911 |
| SAL_FA9400AA | AZ-TG74416          | SRR3223149 | 2005 |    | North America | United States | Enteritidis             | Enteritidis | 1425  | 45872 |
| SAL_FA9428AA | AZ-TG92664          | SRR3219250 | 2015 | 4  | North America | United States | Enteritidis             | Enteritidis | 1425  | 4169  |
| SAL_FA9429AA | AZ-TG92660          | SRR3219249 | 2015 | 4  | North America | United States | Enteritidis             | Enteritidis | 1425  | 4169  |
| SAL_FA9449AA | CVM-N19727          | SRR3219139 | 2008 |    | North America | United States | Enteritidis             | Enteritidis | 1425  | 45809 |
| SAL_FA9450AA | CVM-N18616          | SRR3219137 | 2008 |    | North America | United States | Enteritidis             | Enteritidis | 1425  | 45807 |
| SAL_FA9451AA | AZ-TG92700          | SRR3219135 | 2015 | 9  | North America | United States | Enteritidis             | Enteritidis | 1425  | 45806 |
| SAL_FA9452AA | AZ-TG92696          | SRR3219133 | 2015 | 9  | North America | United States | Enteritidis             | Enteritidis | 1425  | 45805 |
| SAL_FA9453AA | AZ-TG92692          | SRR3219127 | 2015 | 9  | North America | United States | Enteritidis             | Enteritidis | 1425  | 4174  |
| SAL_FA9454AA | AZ-TG92688          | SRR3219125 | 2015 | 9  | North America | United States | Enteritidis             | Enteritidis | 1425  | 45804 |
| SAL_FA9455AA | AZ-TG92684          | SRR3219124 | 2015 | 9  | North America | United States | Enteritidis             | Enteritidis | 1425  | 4174  |
| SAL_FA9456AA | AZ-TG92680          | SRR3219123 | 2015 | 9  | North America | United States | Enteritidis             | Enteritidis | 1425  | 4174  |
| SAL_FA9457AA | AZ-TG92676          | SRR3219121 | 2015 | 9  | North America | United States | Enteritidis             | Enteritidis | 1425  | 4174  |
| SAL_FA9458AA | AZ-TG92672          | SRR3219120 | 2015 | 9  | North America | United States | Enteritidis             | Enteritidis | 1425  | 46021 |
| SAL_FA9478AA | I2016002671         | SRR3217352 | 2016 | 2  | North America | United States | Enteritidis             | Enteritidis | 1425  | 45779 |
| SAL_FA9479AA | E2016003173         | SRR3217351 | 2016 | 2  | North America | United States | Enteritidis             | Enteritidis | 1425  | 45784 |
| SAL_FA9480AA | E2016003171         | SRR3217350 | 2016 | 2  | North America | United States | Enteritidis             | Enteritidis | 42123 | 45783 |
| SAL_FA9481AA | E2016002889         | SRR3217349 | 2016 | 2  | North America | United States | I 9,12:-:-              | Enteritidis | 42123 | 45782 |
| SAL_FA9482AA | E2016002887         | SRR3217348 | 2016 | 2  | North America | United States | Enteritidis             | Enteritidis | 1425  | 45781 |
| SAL_FA9483AA | E2016002765         | SRR3217347 | 2016 | 2  | North America | United States | Enteritidis             | Enteritidis | 1425  | 45780 |
| SAL_FA9484AA | E2016002752         | SRR3217346 | 2016 | 2  | North America | United States | Enteritidis             | Enteritidis | 1425  | 45779 |
| SAL_FA9485AA | E2016002728         | SRR3217345 | 2016 | 2  | North America | United States | Enteritidis             | Enteritidis | 1425  | 45778 |
| SAL_FA9486AA | E2016002711         | SRR3217344 | 2016 | 2  | North America | United States | Enteritidis             | Enteritidis | 1425  | 40905 |
| SAL_FA9512AA | E2015011861         | SRR3135177 | 2015 | 8  | North America | United States | Enteritidis             | Enteritidis | 1425  | 45534 |
| SAL_FA9536AA | CDPHFDLB-F14M01191b | SRR3110376 | 2014 | 7  | North America | United States | Enteritidis             | Enteritidis | 1425  | 45512 |
| SAL_FA9537AA | CDPHFDLB-F14M01191a | SRR3110375 | 2014 | 7  | North America | United States | Enteritidis             | Enteritidis | 1425  | 45511 |
| SAL_FA9548AA | E2016000287         | SRR3110337 | 2015 | 12 | North America | United States | Enteritidis             | Enteritidis | 1425  | 45499 |
| SAL_FA9549AA | E2016000456         | SRR3110336 | 2015 | 12 | North America | United States | Enteritidis             | Enteritidis | 1425  | 45498 |
| SAL_FA9550AA | E2016000376         | SRR3110335 | 2016 | 1  | North America | United States | Enteritidis             | Enteritidis | 26775 | 45497 |
| SAL_FA9614AA | CVM-N23792          | SRR3098645 | 2010 |    | North America | United States | Enteritidis             | Enteritidis | 1425  | 45460 |
| SAL_FA9641AA | WAPHL-SAL-A00966    | SRR3057230 | 2009 |    | North America | United States | Enteritidis             | Enteritidis | 33238 | 45436 |
| SAL_FA9644AA | WAPHL-SAL-A00963    | SRR3057227 | 2009 |    | North America | United States | Enteritidis             | Enteritidis | 1425  | 45434 |
| SAL_GA0110AA | NY59589192          | SRR2734630 |      |    |               |               | Enteritidis (Predicted) | Enteritidis | 1425  | 45084 |
| SAL_GA0111AA | NY59589171          | SRR2734629 |      |    |               |               | Enteritidis (Predicted) | Enteritidis | 1425  | 45089 |
| SAL_GA0112AA | NY59550709          | SRR2734585 | 2015 | 9  | North America | United States | Enteritidis             | Enteritidis | 1425  | 45088 |
| SAL_GA0113AA | NY59550630          | SRR2734584 | 2015 | 8  | North America | United States | Enteritidis             | Enteritidis | 1425  | 3333  |
| SAL_GA0114AA | NY59550216          | SRR2734583 | 2015 | 9  | North America | United States | Enteritidis             | Enteritidis | 1425  | 45085 |
| SAL_GA0115AA | NY59550178          | SRR2734559 | 2015 | 9  | North America | United States | Enteritidis             | Enteritidis | 1425  | 45084 |
| SAL_GA0117AA | VNB1352-sc-2280688  | ERR1069321 |      |    |               |               | Enteritidis (Predicted) | Enteritidis | 1425  | 44855 |
| SAL_GA0119AA | VNB1343-sc-2280684  | ERR1069319 |      |    |               |               | Enteritidis (Predicted) | Enteritidis | 1425  | 45087 |

|              |                      |            |                         |             |       |       |
|--------------|----------------------|------------|-------------------------|-------------|-------|-------|
| SAL_GA0122AA | VNB1284-sc-2280679   | ERR1069316 |                         | Enteritidis | 42109 | 45081 |
| SAL_GA0127AA | VNB1216-sc-2280670   | ERR1069311 | Enteritidis (Predicted) | Enteritidis | 1425  | 44867 |
| SAL_GA0131AA | VNB1125-sc-2280662   | ERR1069307 | Enteritidis (Predicted) | Enteritidis | 1425  | 45073 |
| SAL_GA0133AA | VNB1106-sc-2280658   | ERR1069305 | Enteritidis (Predicted) | Enteritidis | 1425  | 45071 |
| SAL_GA0134AA | VNB1094-sc-2280656   | ERR1069304 | Enteritidis (Predicted) | Enteritidis | 1425  | 45068 |
| SAL_GA0136AA | VNB1048-sc-2280653   | ERR1069302 | Enteritidis (Predicted) | Enteritidis | 1425  | 45067 |
| SAL_GA0137AA | VNB1039-sc-2280651   | ERR1069301 | Enteritidis (Predicted) | Enteritidis | 1425  | 45065 |
| SAL_GA0138AA | VNB1028-sc-2280648   | ERR1069300 | Enteritidis (Predicted) | Enteritidis | 1425  | 44867 |
| SAL_GA0139AA | VNB1010-sc-2280646   | ERR1069299 | Enteritidis (Predicted) | Enteritidis | 1425  | 45064 |
| SAL_GA0140AA | VNB985-sc-2280644    | ERR1069298 | Enteritidis (Predicted) | Enteritidis | 1425  | 45063 |
| SAL_GA0142AA | VNB899-sc-2280639    | ERR1069296 | Enteritidis (Predicted) | Enteritidis | 1425  | 45062 |
| SAL_GA0147AA | VNB789-sc-2280629    | ERR1069291 | Enteritidis (Predicted) | Enteritidis | 1425  | 45057 |
| SAL_GA0149AA | VNB719-sc-2280625    | ERR1069289 |                         | Enteritidis | 42115 | 45056 |
| SAL_GA0150AA | VNB713-sc-2280623    | ERR1069288 | Enteritidis (Predicted) | Enteritidis | 1425  | 45055 |
| SAL_GA0151AA | VNB703-sc-2280621    | ERR1069287 | Enteritidis (Predicted) | Enteritidis | 1425  | 45054 |
| SAL_GA0152AA | VNB631-sc-2280619    | ERR1069286 | Enteritidis (Predicted) | Enteritidis | 1425  | 45053 |
| SAL_GA0155AA | VNB498-sc-2280613    | ERR1069283 | Enteritidis (Predicted) | Enteritidis | 1425  | 45049 |
| SAL_GA0157AA | VNB246-sc-2280609    | ERR1069281 | Enteritidis (Predicted) | Enteritidis | 1425  | 45047 |
| SAL_GA0158AA | VNB203-sc-2280607    | ERR1069280 | Enteritidis (Predicted) | Enteritidis | 1425  | 45045 |
| SAL_GA0159AA | VNB162-sc-2280604    | ERR1069279 | Enteritidis (Predicted) | Enteritidis | 1425  | 45046 |
| SAL_GA0160AA | VNB160-sc-2280602    | ERR1069278 | Enteritidis (Predicted) | Enteritidis | 1425  | 45043 |
| SAL_GA0161AA | VNB114-sc-2280599    | ERR1069277 | Enteritidis (Predicted) | Enteritidis | 1425  | 45044 |
| SAL_GA0163AA | VNB53-sc-2280595     | ERR1069275 | Enteritidis (Predicted) | Enteritidis | 1425  | 45042 |
| SAL_GA0164AA | VNB24-sc-2280591     | ERR1069274 | Enteritidis (Predicted) | Enteritidis | 1425  | 45041 |
| SAL_GA0165AA | 2659-sc-2280589      | ERR1069273 | Enteritidis (Predicted) | Enteritidis | 1425  | 45040 |
| SAL_GA0166AA | 2651-sc-2280588      | ERR1069272 | Enteritidis (Predicted) | Enteritidis | 1425  | 45039 |
| SAL_GA0167AA | 2646-sc-2280586      | ERR1069271 | Enteritidis (Predicted) | Enteritidis | 1425  | 45038 |
| SAL_GA0169AA | 2614-sc-2280582      | ERR1069269 | Enteritidis (Predicted) | Enteritidis | 1425  | 45036 |
| SAL_GA0170AA | 2540-sc-2280580      | ERR1069268 | Enteritidis (Predicted) | Enteritidis | 1425  | 45035 |
| SAL_GA0171AA | 2521-sc-2280578      | ERR1069267 | Enteritidis (Predicted) | Enteritidis | 1425  | 45031 |
| SAL_GA0175AA | 2355-sc-2280570      | ERR1069263 | Enteritidis (Predicted) | Enteritidis | 1425  | 44875 |
| SAL_GA0176AA | 2263-sc-2280568      | ERR1069262 | Enteritidis (Predicted) | Enteritidis | 1425  | 45029 |
| SAL_GA0177AA | 2251-sc-2280566      | ERR1069261 | Enteritidis (Predicted) | Enteritidis | 1425  | 45028 |
| SAL_GA0178AA | 2177-sc-2280563      | ERR1069260 | Enteritidis (Predicted) | Enteritidis | 1425  | 45026 |
| SAL_GA0179AA | 2164-sc-2280562      | ERR1069259 | Enteritidis (Predicted) | Enteritidis | 1425  | 45027 |
| SAL_GA0181AA | 2097-sc-2280558      | ERR1069257 | Enteritidis (Predicted) | Enteritidis | 1425  | 45024 |
| SAL_GA0182AA | 2093-sc-2280557      | ERR1069256 | Enteritidis (Predicted) | Enteritidis | 1425  | 45023 |
| SAL_GA0183AA | 2086-sc-2280556      | ERR1069255 | Enteritidis (Predicted) | Enteritidis | 1425  | 45022 |
| SAL_GA0184AA | 1992-sc-2280555      | ERR1069254 | Enteritidis (Predicted) | Enteritidis | 1425  | 45021 |
| SAL_GA0185AA | 1937-sc-2280554      | ERR1069253 | Enteritidis (Predicted) | Enteritidis | 1425  | 45020 |
| SAL_GA0186AA | 1935-sc-2280553      | ERR1069252 | Enteritidis (Predicted) | Enteritidis | 1425  | 44875 |
| SAL_GA0187AA | 1915-sc-2280552      | ERR1069251 | Enteritidis (Predicted) | Enteritidis | 1425  | 45019 |
| SAL_GA0188AA | 1909-sc-2280551      | ERR1069250 | Enteritidis (Predicted) | Enteritidis | 1425  | 45018 |
| SAL_GA0189AA | 1852-sc-2280550      | ERR1069249 | Enteritidis (Predicted) | Enteritidis | 1425  | 45017 |
| SAL_GA0190AA | 1829-sc-2280549      | ERR1069248 | Enteritidis (Predicted) | Enteritidis | 1425  | 45016 |
| SAL_GA0191AA | 1821-sc-2280548      | ERR1069247 | Enteritidis (Predicted) | Enteritidis | 1425  | 45015 |
| SAL_GA0193AA | 1783-sc-2280546      | ERR1069245 | Enteritidis (Predicted) | Enteritidis | 1425  | 45013 |
| SAL_GA0194AA | 1731-sc-2280545      | ERR1069244 | Enteritidis (Predicted) | Enteritidis | 1425  | 45012 |
| SAL_GA0195AA | 1725-sc-2280544      | ERR1069243 | Enteritidis (Predicted) | Enteritidis | 1425  | 45011 |
| SAL_GA0197AA | MT16C_2_3-sc-2280811 | ERR1069241 | Enteritidis (Predicted) | Enteritidis | 1425  | 44992 |
| SAL_GA0220AA | MT28C_3_1-sc-2280826 | ERR1046282 | Enteritidis (Predicted) | Enteritidis | 1425  | 44996 |
| SAL_GA0221AA | MT28C_2_1-sc-2280824 | ERR1046281 | Enteritidis (Predicted) | Enteritidis | 1425  | 44995 |
| SAL_GA0222AA | MT28C_1_1-sc-2280821 | ERR1046280 | Enteritidis (Predicted) | Enteritidis | 1425  | 44994 |
| SAL_GA0223AA | MT25C_2_1-sc-2280819 | ERR1046279 | Enteritidis (Predicted) | Enteritidis | 1425  | 44875 |
| SAL_GA0224AA | MT25C_1_1-sc-2280817 | ERR1046278 | Enteritidis (Predicted) | Enteritidis | 1425  | 44875 |
| SAL_GA0226AA | MT16C_2_1-sc-2280809 | ERR1046276 | Enteritidis (Predicted) | Enteritidis | 1425  | 44992 |
| SAL_GA0241AA | CT08C_2_1-sc-2280780 | ERR1046261 | Enteritidis (Predicted) | Enteritidis | 1425  | 44980 |
| SAL_GA0249AA | CG12C_3_1-sc-2280772 | ERR1046253 | Enteritidis (Predicted) | Enteritidis | 1425  | 44973 |
| SAL_GA0250AA | CG12C_1_1-sc-2280771 | ERR1046252 | Enteritidis (Predicted) | Enteritidis | 1425  | 44970 |

|              |                      |            |                         |             |      |       |
|--------------|----------------------|------------|-------------------------|-------------|------|-------|
| SAL_GA0251AA | CG11C_2_1-sc-2280770 | ERR1046251 | Enteritidis (Predicted) | Enteritidis | 1425 | 44969 |
| SAL_GA0252AA | CG07C_1_1-sc-2280769 | ERR1046250 | Enteritidis (Predicted) | Enteritidis | 1425 | 44968 |
| SAL_GA0280AA | 72_V_027-sc-2280740  | ERR1046222 | Enteritidis (Predicted) | Enteritidis | 1425 | 44944 |
| SAL_GA0290AA | 72_G_172-sc-2280729  | ERR1046212 | Enteritidis (Predicted) | Enteritidis | 1425 | 44855 |
| SAL_GA0330AA | KH_46-sc-2280650     | ERR1046172 | Enteritidis (Predicted) | Enteritidis | 1425 | 44904 |
| SAL_GA0331AA | Hue_99-sc-2280649    | ERR1046171 | Enteritidis (Predicted) | Enteritidis | 1425 | 44903 |
| SAL_GA0332AA | Hue_96-sc-2280647    | ERR1046170 | Enteritidis (Predicted) | Enteritidis | 1425 | 44902 |
| SAL_GA0334AA | Hue_52-sc-2280643    | ERR1046168 | Enteritidis (Predicted) | Enteritidis | 1425 | 45255 |
| SAL_GA0350AA | VNSC2508-sc-2280612  | ERR1046152 | Enteritidis (Predicted) | Enteritidis | 1425 | 44889 |
| SAL_GA0360AA | VNS20361-sc-2280590  | ERR1046142 | Enteritidis (Predicted) | Enteritidis | 1425 | 44882 |
| SAL_GA0372AA | VNB1680-sc-2280561   | ERR1046130 | Enteritidis (Predicted) | Enteritidis | 1425 | 44867 |
| SAL_GA0373AA | VNB1663-sc-2280560   | ERR1046129 | Enteritidis (Predicted) | Enteritidis | 1425 | 44865 |
| SAL_GA0374AA | VNB1662-sc-2280721   | ERR1046128 | Enteritidis (Predicted) | Enteritidis | 1425 | 44875 |
| SAL_GA0375AA | VNB1661-sc-2280719   | ERR1046127 | Enteritidis (Predicted) | Enteritidis | 1425 | 44866 |
| SAL_GA0377AA | VNB1572-sc-2280715   | ERR1046125 | Enteritidis (Predicted) | Enteritidis | 1425 | 44863 |
| SAL_GA0378AA | VNB1560-sc-2280712   | ERR1046124 | Enteritidis (Predicted) | Enteritidis | 1425 | 44862 |
| SAL_GA0380AA | VNB1523-sc-2280708   | ERR1046122 | Enteritidis (Predicted) | Enteritidis | 1425 | 44860 |
| SAL_GA0384AA | VNB1489-sc-2280699   | ERR1046118 | Enteritidis (Predicted) | Enteritidis | 1425 | 44855 |
| SAL_GA0385AA | VNB1434-sc-2280697   | ERR1046117 | Enteritidis (Predicted) | Enteritidis | 1425 | 44856 |
| SAL_GA0386AA | VNB1430-sc-2280695   | ERR1046116 | Enteritidis (Predicted) | Enteritidis | 1425 | 44855 |
| SAL_GA0387AA | VNB1425-sc-2280692   | ERR1046115 | Enteritidis (Predicted) | Enteritidis | 1425 | 44854 |
| SAL_GA0388AA | VNB1370-sc-2280691   | ERR1046114 | Enteritidis (Predicted) | Enteritidis | 1425 | 44853 |
| SAL_GA0415AA | gha60207-sc-2235410  | ERR1010174 | Enteritidis             | Enteritidis | 1425 | 44850 |
| SAL_GA0416AA | gha114900-sc-2235407 | ERR1010173 | Enteritidis             | Enteritidis | 1425 | 44785 |
| SAL_GA0437AA | gha601338-sc-2235365 | ERR1010152 | Enteritidis             | Enteritidis | 1425 | 44844 |
| SAL_GA0447AA | gha63084-sc-2235342  | ERR1010142 | Typhi                   | Enteritidis | 1425 | 44496 |
| SAL_GA0448AA | gha61020-sc-2235340  | ERR1010141 | Enteritidis             | Enteritidis | 1425 | 44841 |
| SAL_GA0460AA | gha113562-sc-2235315 | ERR1010129 | Enteritidis             | Enteritidis | 1425 | 44483 |
| SAL_GA0461AA | gha86779-sc-2235313  | ERR1010128 | Enteritidis             | Enteritidis | 1425 | 44837 |
| SAL_GA0487AA | gha114062-sc-2235395 | ERR1010101 | Enteritidis             | Enteritidis | 1425 | 44826 |
| SAL_GA0497AA | sen00489-sc-2235375  | ERR1010091 | Typhimurium             | Enteritidis | 1425 | 44488 |
| SAL_GA0506AA | gha113599-sc-2235201 | ERR1010082 | Enteritidis             | Enteritidis | 1425 | 44496 |
| SAL_GA0524AA | gha113480-sc-2235165 | ERR1010064 | Enteritidis             | Enteritidis | 1425 | 44805 |
| SAL_GA0529AA | gha112732-sc-2235153 | ERR1010059 | Enteritidis             | Enteritidis | 1425 | 44801 |
| SAL_GA0552AA | gha114900-sc-2235106 | ERR1010036 | Enteritidis             | Enteritidis | 1425 | 44785 |
| SAL_GA0556AA | gha113491-sc-2235099 | ERR1010032 | Enteritidis             | Enteritidis | 1425 | 44681 |
| SAL_GA0560AA | gha115116-sc-2235090 | ERR1010028 | Enteritidis             | Enteritidis | 1425 | 44779 |
| SAL_GA0561AA | gha113573-sc-2235088 | ERR1010027 | Enteritidis             | Enteritidis | 1425 | 44780 |
| SAL_GA0587AA | bkf00121-sc-2235206  | ERR1010000 | Enteritidis             | Enteritidis | 1425 | 44619 |
| SAL_GA0640AA | pw1547_3-sc-2235654  | ERR998598  | Enteritidis (Predicted) | Enteritidis | 7942 | 44735 |
| SAL_GA0722AA | gha113718-sc-2235614 | ERR998502  | Enteritidis             | Enteritidis | 1425 | 44582 |
| SAL_GA0735AA | gha113491-sc-2235580 | ERR998484  | Enteritidis             | Enteritidis | 1425 | 44681 |
| SAL_GA0766AA | gha83911-sc-2235537  | ERR984964  | Enteritidis             | Enteritidis | 1425 | 44631 |
| SAL_GA0836AA | gha83911-sc-2235418  | ERR984884  | Enteritidis             | Enteritidis | 1425 | 44631 |
| SAL_GA0847AA | gha114146-sc-2235352 | ERR984873  | Enteritidis             | Enteritidis | 1425 | 44621 |
| SAL_GA0849AA | bkf00121-sc-2235348  | ERR984871  | Enteritidis             | Enteritidis | 1425 | 44619 |
| SAL_GA0875AA | gha200805-sc-2235295 | ERR984845  | Enteritidis             | Enteritidis | 1425 | 44605 |
| SAL_GA0882AA | gha400816-sc-2235288 | ERR984838  | Enteritidis (Predicted) | Enteritidis | 1425 | 44600 |
| SAL_GA0898AA | gha114606-sc-2235272 | ERR984822  | Enteritidis             | Enteritidis | 1425 | 44588 |
| SAL_GA0908AA | gha113718-sc-2235255 | ERR984812  | Enteritidis             | Enteritidis | 1425 | 44582 |
| SAL_GA0917AA | gha114543-sc-2235237 | ERR984803  | Enteritidis             | Enteritidis | 1425 | 44574 |
| SAL_GA0935AA | bkf01708-sc-2235192  | ERR984785  | Enteritidis             | Enteritidis | 1425 | 44556 |
| SAL_GA0945AA | gha300240-sc-2235168 | ERR984775  | Enteritidis             | Enteritidis | 1425 | 44544 |
| SAL_GA0963AA | rsa639626-sc-2235121 | ERR984757  | Enteritidis             | Enteritidis | 1425 | 44527 |
| SAL_GA0982AA | gnb00128-sc-2235081  | ERR984738  | Typhimurium             | Enteritidis | 1425 | 44510 |
| SAL_GA0997AA | gha113599-sc-2235296 | ERR984719  | Enteritidis             | Enteritidis | 1425 | 44496 |
| SAL_GA1007AA | sen00489-sc-2235156  | ERR984709  | Typhimurium             | Enteritidis | 1425 | 44488 |
| SAL_GA1012AA | gha113562-sc-2235089 | ERR984704  | Enteritidis             | Enteritidis | 1425 | 44483 |
| SAL_GA1154AA | AviproE-sc-2140669   | ERR744295  | Typhimurium             | Enteritidis | 8185 | 44362 |

|              |                      |            |      |    |  |               |               |            |  |                         |             |       |       |
|--------------|----------------------|------------|------|----|--|---------------|---------------|------------|--|-------------------------|-------------|-------|-------|
| SAL_GA1170AA | FieldSE-sc-2140653   | ERR744279  |      |    |  |               |               |            |  | Typhimurium             | Enteritidis | 1425  | 44351 |
| SAL_GA1210AA | Gallivac-sc-2140593  | ERR744238  |      |    |  |               |               |            |  | Typhimurium             | Enteritidis | 1425  | 44316 |
| SAL_GA1260AA | S01045_06-sc-2140532 | ERR744171  |      |    |  |               |               |            |  | Typhimurium             | Enteritidis | 1425  | 44206 |
| SAL_GA1288AA | S4022_12-sc-2140711  | ERR744329  |      |    |  |               |               |            |  | Typhimurium             | Enteritidis | 1425  | 44178 |
| SAL_GA1290AA | S355_13-sc-2140709   | ERR744327  |      |    |  |               |               |            |  | Typhimurium             | Enteritidis | 1425  | 44177 |
| SAL_GA1292AA | S668_06-sc-2140706   | ERR744325  |      |    |  |               |               |            |  | Typhimurium             | Enteritidis | 1425  | 44175 |
| SAL_GA1324AA | PO1334-sc-1993724    | ERR731400  |      |    |  |               |               |            |  | Typhi                   | Enteritidis | 41670 | 44155 |
| SAL_GA1562AA | NY-swgs1581          | SRR1774123 | 2014 | 12 |  | North America | United States |            |  | Enteritidis             | Enteritidis | 1425  | 36671 |
| SAL_GA1621AA | SWUN 3736            | SRR1946847 | 2010 |    |  |               |               | Unresolved |  | Onarimon                | Enteritidis | 41673 | 44077 |
| SAL_GA1622AA | SWUN 3733            | SRR1946844 | 2010 |    |  |               |               | Unresolved |  | Blegdam                 | Enteritidis | 41673 | 44077 |
| SAL_GA1623AA | SWUN 3712            | SRR1946842 | 2010 |    |  |               |               | Unresolved |  | Enterica                | Enteritidis | 41673 | 44077 |
| SAL_GA1723AA | SAL3385              | SRR1840657 | 2005 |    |  |               |               |            |  | Enteritidis             | Enteritidis | 1425  | 43970 |
| SAL_GA1724AA | SAL3369              | SRR1840656 | 2006 |    |  |               |               |            |  | Enteritidis             | Enteritidis | 1425  | 43968 |
| SAL_GA1725AA | SAL3364              | SRR1840655 | 2006 |    |  |               |               |            |  | Enteritidis             | Enteritidis | 1425  | 43967 |
| SAL_GA1726AA | SAL3360              | SRR1840654 | 2005 |    |  |               |               |            |  | Enteritidis             | Enteritidis | 1425  | 43966 |
| SAL_GA1744AA | BCW_2429             | SRR1840636 |      |    |  | North America | United States |            |  | Enteritidis             | Enteritidis | 26543 | 43949 |
| SAL_GA1769AA | BCW_2126             | SRR1840611 | 2010 |    |  | North America | United States |            |  | Enteritidis             | Enteritidis | 41626 | 43925 |
| SAL_GA1819AA | BCW_2577             | SRR1814454 |      |    |  |               |               |            |  | Enteritidis (Predicted) | Enteritidis | 1425  | 43879 |
| SAL_GA1986AA | BCW_4684             | SRR1816355 |      |    |  |               |               |            |  | Enteritidis (Predicted) | Enteritidis | 41007 | 43694 |
| SAL_GA1987AA | BCW_4683             | SRR1816354 |      |    |  |               |               |            |  | Enteritidis (Predicted) | Enteritidis | 8384  | 43693 |
| SAL_GA1988AA | BCW_4682             | SRR1816353 |      |    |  |               |               |            |  | Enteritidis (Predicted) | Enteritidis | 8384  | 43692 |
| SAL_GA1989AA | BCW_4681             | SRR1816352 |      |    |  |               |               |            |  | Enteritidis (Predicted) | Enteritidis | 8384  | 42977 |
| SAL_GA1990AA | BCW_4680             | SRR1816351 |      |    |  |               |               |            |  | Enteritidis (Predicted) | Enteritidis | 1425  | 42991 |
| SAL_GA1991AA | BCW_4679             | SRR1816350 |      |    |  |               |               |            |  | Enteritidis (Predicted) | Enteritidis | 1425  | 43677 |
| SAL_GA1992AA | BCW_4678             | SRR1816349 |      |    |  |               |               |            |  | Enteritidis (Predicted) | Enteritidis | 1425  | 42991 |
| SAL_GA1993AA | BCW_4677             | SRR1816348 |      |    |  |               |               |            |  | Enteritidis (Predicted) | Enteritidis | 8384  | 43691 |
| SAL_GA1994AA | BCW_4676             | SRR1816347 |      |    |  |               |               |            |  | Enteritidis (Predicted) | Enteritidis | 8384  | 43690 |
| SAL_GA1995AA | BCW_4675             | SRR1816346 |      |    |  |               |               |            |  | Enteritidis (Predicted) | Enteritidis | 8384  | 43689 |
| SAL_GA1996AA | BCW_4674             | SRR1816345 |      |    |  |               |               |            |  | Enteritidis (Predicted) | Enteritidis | 1425  | 43273 |
| SAL_GA1997AA | BCW_4673             | SRR1816344 |      |    |  |               |               |            |  | Enteritidis (Predicted) | Enteritidis | 1425  | 42991 |
| SAL_GA1998AA | BCW_4672             | SRR1816343 |      |    |  |               |               |            |  | Enteritidis (Predicted) | Enteritidis | 8384  | 43688 |
| SAL_GA1999AA | BCW_4671             | SRR1816342 |      |    |  |               |               |            |  | Enteritidis (Predicted) | Enteritidis | 1425  | 43687 |
| SAL_GA2000AA | BCW_4670             | SRR1816341 |      |    |  |               |               |            |  | Enteritidis (Predicted) | Enteritidis | 41546 | 43681 |
| SAL_GA2001AA | BCW_4669             | SRR1816340 |      |    |  |               |               |            |  | Enteritidis (Predicted) | Enteritidis | 8384  | 43680 |
| SAL_GA2002AA | BCW_4668             | SRR1816339 |      |    |  |               |               |            |  | Enteritidis (Predicted) | Enteritidis | 1425  | 43686 |
| SAL_GA2003AA | BCW_4667             | SRR1816338 |      |    |  |               |               |            |  | Enteritidis (Predicted) | Enteritidis | 1425  | 43679 |
| SAL_GA2004AA | BCW_4666             | SRR1816337 |      |    |  |               |               |            |  | Enteritidis (Predicted) | Enteritidis | 1425  | 43685 |
| SAL_GA2005AA | BCW_4665             | SRR1816336 |      |    |  |               |               |            |  | Enteritidis (Predicted) | Enteritidis | 1425  | 43678 |
| SAL_GA2006AA | BCW_4664             | SRR1816335 |      |    |  |               |               |            |  | Enteritidis (Predicted) | Enteritidis | 41494 | 43684 |
| SAL_GA2007AA | BCW_4663             | SRR1816334 |      |    |  |               |               |            |  | Enteritidis (Predicted) | Enteritidis | 1425  | 43677 |
| SAL_GA2008AA | BCW_4662             | SRR1816333 |      |    |  |               |               |            |  | Enteritidis (Predicted) | Enteritidis | 1425  | 42975 |
| SAL_GA2009AA | BCW_4661             | SRR1816332 |      |    |  |               |               |            |  | Enteritidis (Predicted) | Enteritidis | 1425  | 42989 |
| SAL_GA2010AA | BCW_4660             | SRR1816331 |      |    |  |               |               |            |  | Enteritidis (Predicted) | Enteritidis | 1425  | 42987 |
| SAL_GA2012AA | BCW_4658             | SRR1816329 |      |    |  |               |               |            |  | Enteritidis (Predicted) | Enteritidis | 1425  | 42182 |
| SAL_GA2013AA | BCW_4657             | SRR1816328 |      |    |  |               |               |            |  | Enteritidis (Predicted) | Enteritidis | 1425  | 42181 |
| SAL_GA2014AA | BCW_4656             | SRR1816327 |      |    |  |               |               |            |  | Enteritidis (Predicted) | Enteritidis | 1425  | 42975 |
| SAL_GA2015AA | BCW_4654             | SRR1816326 |      |    |  |               |               |            |  | Enteritidis (Predicted) | Enteritidis | 8384  | 43675 |
| SAL_GA2016AA | BCW_4653             | SRR1816325 |      |    |  |               |               |            |  | Enteritidis (Predicted) | Enteritidis | 1425  | 42180 |
| SAL_GA2017AA | BCW_4652             | SRR1816324 |      |    |  |               |               |            |  | Enteritidis (Predicted) | Enteritidis | 1425  | 42991 |
| SAL_GA2018AA | BCW_4651             | SRR1816323 |      |    |  |               |               |            |  | Enteritidis (Predicted) | Enteritidis | 1425  | 42974 |
| SAL_GA2070AA | BCW_3070             | SRR1815499 |      |    |  |               |               |            |  | Enteritidis (Predicted) | Enteritidis | 1425  | 42976 |
| SAL_GA2092AA | BCW_3048             | SRR1815477 |      |    |  |               |               |            |  | Enteritidis (Predicted) | Enteritidis | 1425  | 41062 |
| SAL_GA2098AA | BCW_2906             | SRR1815424 |      |    |  |               |               |            |  | Enteritidis (Predicted) | Enteritidis | 1425  | 42552 |
| SAL_GA2249AA | BCW_5906             | SRR1814936 |      |    |  |               |               |            |  | Enteritidis (Predicted) | Enteritidis | 1425  | 43499 |
| SAL_GA2258AA | BCW_5897             | SRR1814927 |      |    |  |               |               |            |  | Enteritidis (Predicted) | Enteritidis | 1425  | 43490 |
| SAL_GA2300AA | BCW_5854             | SRR1814885 |      |    |  |               |               |            |  | Enteritidis (Predicted) | Enteritidis | 1425  | 43448 |
| SAL_GA2301AA | BCW_5853             | SRR1814884 |      |    |  |               |               |            |  | Enteritidis (Predicted) | Enteritidis | 1425  | 43449 |
| SAL_GA2344AA | BCW_2570             | SRR1814453 |      |    |  |               |               |            |  | Enteritidis (Predicted) | Enteritidis | 1425  | 43404 |
| SAL_GA2345AA | BCW_2569             | SRR1814452 |      |    |  |               |               |            |  | Enteritidis (Predicted) | Enteritidis | 1425  | 43405 |

|              |             |            |      |               |               |                         |             |       |       |
|--------------|-------------|------------|------|---------------|---------------|-------------------------|-------------|-------|-------|
| SAL_GA2346AA | BCW_2568    | SRR1814451 |      |               |               | Enteritidis (Predicted) | Enteritidis | 1425  | 43406 |
| SAL_GA2347AA | BCW_2566    | SRR1814450 |      |               |               | Enteritidis (Predicted) | Enteritidis | 1425  | 43404 |
| SAL_GA2349AA | BCW_2559    | SRR1814448 |      |               |               | Enteritidis (Predicted) | Enteritidis | 1425  | 43402 |
| SAL_GA2350AA | BCW_2557    | SRR1814447 |      |               |               | Enteritidis (Predicted) | Enteritidis | 1425  | 43401 |
| SAL_GA2351AA | BCW_2556    | SRR1814446 |      |               |               | Enteritidis (Predicted) | Enteritidis | 1425  | 43400 |
| SAL_GA2352AA | BCW_2553    | SRR1814445 |      |               |               | Enteritidis (Predicted) | Enteritidis | 1425  | 43399 |
| SAL_GA2353AA | BCW_2551    | SRR1814444 |      |               |               | Enteritidis (Predicted) | Enteritidis | 1425  | 43398 |
| SAL_GA2354AA | BCW_2550    | SRR1814443 |      |               |               | Enteritidis (Predicted) | Enteritidis | 1425  | 43397 |
| SAL_GA2355AA | BCW_2549    | SRR1814442 |      |               |               | Enteritidis (Predicted) | Enteritidis | 41467 | 43396 |
| SAL_GA2356AA | BCW_2544    | SRR1814441 |      |               |               | Enteritidis (Predicted) | Enteritidis | 41148 | 43395 |
| SAL_GA2388AA | BCW_2448    | SRR1814407 |      |               |               | Enteritidis (Predicted) | Enteritidis | 1425  | 43745 |
| SAL_GA2400AA | BCW_2020    | SRR1814324 |      |               |               | Enteritidis (Predicted) | Enteritidis | 8384  | 43274 |
| SAL_GA2401AA | BCW_2019    | SRR1814323 |      |               |               | Enteritidis (Predicted) | Enteritidis | 1425  | 43273 |
| SAL_GA2403AA | BCW_2017    | SRR1814321 |      |               |               | Enteritidis (Predicted) | Enteritidis | 8384  | 43271 |
| SAL_GA2404AA | BCW_2016    | SRR1814320 |      |               |               | Enteritidis (Predicted) | Enteritidis | 8384  | 43270 |
| SAL_GA2405AA | BCW_2015    | SRR1814319 |      |               |               | Enteritidis (Predicted) | Enteritidis | 8384  | 43269 |
| SAL_GA2406AA | BCW_2014    | SRR1814318 |      |               |               | Enteritidis (Predicted) | Enteritidis | 26543 | 43268 |
| SAL_GA2407AA | BCW_2013    | SRR1814317 |      |               |               | Enteritidis (Predicted) | Enteritidis | 26543 | 43267 |
| SAL_GA2419AA | BCW_1996    | SRR1814305 |      |               |               | Enteritidis (Predicted) | Enteritidis | 26543 | 43255 |
| SAL_GA2423AA | BCW_1992    | SRR1814301 |      |               |               | Enteritidis (Predicted) | Enteritidis | 26543 | 43250 |
| SAL_GA2425AA | BCW_1990    | SRR1814299 |      |               |               | Enteritidis (Predicted) | Enteritidis | 41141 | 43249 |
| SAL_GA2427AA | BCW_1988    | SRR1814297 |      |               |               | Enteritidis (Predicted) | Enteritidis | 1425  | 43247 |
| SAL_GA2428AA | BCW_1987    | SRR1814296 |      |               |               | Enteritidis (Predicted) | Enteritidis | 1425  | 43246 |
| SAL_GA2429AA | BCW_1986    | SRR1814295 |      |               |               | Enteritidis (Predicted) | Enteritidis | 1425  | 43245 |
| SAL_GA2430AA | BCW_1985    | SRR1814294 |      |               |               | Enteritidis (Predicted) | Enteritidis | 1425  | 43244 |
| SAL_GA2431AA | BCW_1984    | SRR1814293 |      |               |               | Enteritidis (Predicted) | Enteritidis | 1425  | 43243 |
| SAL_GA2432AA | BCW_1983    | SRR1814292 |      |               |               | Enteritidis (Predicted) | Enteritidis | 1425  | 43242 |
| SAL_GA2440AA | BCW_1975    | SRR1814284 |      |               |               | Enteritidis (Predicted) | Enteritidis | 1425  | 43234 |
| SAL_GA2742AA | CRJGF_00171 | SRR1686645 | 2004 | North America | United States | Enteritidis             | Enteritidis | 1425  | 13840 |
| SAL_GA2775AA | CRJGF_00137 | SRR1686612 | 2002 | North America | United States | Enteritidis             | Enteritidis | 1425  | 41919 |
| SAL_GA2781AA | CRJGF_00131 | SRR1686606 | 2005 | North America | United States | Enteritidis             | Enteritidis | 40459 | 41913 |
| SAL_GA2782AA | CRJGF_00130 | SRR1686605 | 2006 | North America | United States | Enteritidis             | Enteritidis | 1425  | 41912 |
| SAL_GA2783AA | CRJGF_00129 | SRR1686604 | 1999 | North America | United States | Enteritidis             | Enteritidis | 1425  | 41911 |
| SAL_GA2855AA | CRJGF_00056 | SRR1686531 | 2004 | North America | United States | Enteritidis             | Enteritidis | 27433 | 41841 |
| SAL_GA2898AA | CRJGF_00013 | SRR1686488 | 2010 | North America | United States | Enteritidis             | Enteritidis | 1425  | 13017 |
| SAL_GA2899AA | CRJGF_00012 | SRR1686487 | 1998 | North America | United States | Enteritidis             | Enteritidis | 1425  | 42644 |
| SAL_GA2900AA | CRJGF_00011 | SRR1686486 | 2002 | North America | United States | Enteritidis             | Enteritidis | 1425  | 42645 |
| SAL_GA2901AA | CRJGF_00010 | SRR1686485 | 2002 | North America | United States | Enteritidis             | Enteritidis | 26543 | 42973 |
| SAL_GA2902AA | CRJGF_00009 | SRR1686484 | 2010 | North America | United States | Enteritidis             | Enteritidis | 1425  | 42651 |
| SAL_GA2903AA | CRJGF_00008 | SRR1686483 | 2007 | North America | United States | Enteritidis             | Enteritidis | 1425  | 42650 |
| SAL_GA2904AA | CRJGF_00007 | SRR1686482 | 2005 | North America | United States | Enteritidis             | Enteritidis | 1425  | 42643 |
| SAL_GA2905AA | CRJGF_00006 | SRR1686481 | 2008 | North America | United States | Enteritidis             | Enteritidis | 1425  | 42643 |
| SAL_GA2906AA | CRJGF_00005 | SRR1686480 | 2001 | North America | United States | Enteritidis             | Enteritidis | 1425  | 43319 |
| SAL_GA2907AA | CRJGF_00004 | SRR1686479 | 2008 | North America | United States | Enteritidis             | Enteritidis | 1425  | 42971 |
| SAL_GA2991AA | 60277       | SRR1544563 | 2002 | North America | United States | Enteritidis             | Enteritidis | 1425  | 41919 |
| SAL_GA2992AA | UC06        | SRR1544580 | 2004 |               |               | Enteritidis (Predicted) | Enteritidis | 26543 | 42999 |
| SAL_GA2994AA | Stk # 1280  | SRR1544562 | 1965 | Europe        | Slovakia      | Nitra                   | Enteritidis | 1425  | 42996 |
| SAL_GA2995AA | 353410      | SRR1536816 |      |               |               | Enteritidis (Predicted) | Enteritidis | 1425  | 42997 |
| SAL_GA2996AA | 77320       | SRR1536814 | 2004 | North America | United States | Enteritidis             | Enteritidis | 1425  | 13840 |
| SAL_GA2997AA | 81748       | SRR1536813 | 2005 | North America | United States | Enteritidis             | Enteritidis | 40459 | 41913 |
| SAL_GA2998AA | 82631       | SRR1536812 | 2006 | North America | United States | Enteritidis             | Enteritidis | 1425  | 41912 |
| SAL_GA2999AA | 96-0186     | SRR1536811 | 1996 | North America | United States | Nitra                   | Enteritidis | 26543 | 42995 |
| SAL_GA3000AA | J0915       | SRR1544561 | 2001 | North America | United States | Enteritidis             | Enteritidis | 1425  | 42994 |
| SAL_GA3001AA | UC12        | SRR1544559 | 2002 | North America | United States | Enteritidis             | Enteritidis | 1425  | 42993 |
| SAL_GA3002AA | UC02        | SRR1544558 | 2004 | North America | United States | Enteritidis             | Enteritidis | 26543 | 42992 |
| SAL_GA3003AA | 1102933A    | SRR1544578 | 2011 | North America | United States | Enteritidis             | Enteritidis | 1425  | 42991 |
| SAL_GA3004AA | 0811210F    | SRR1544577 | 2008 | North America | United States | Enteritidis             | Enteritidis | 41007 | 42990 |
| SAL_GA3005AA | 0701376-4   | SRR1544556 | 2007 | North America | United States | Enteritidis             | Enteritidis | 1425  | 42989 |
| SAL_GA3006AA | 502571      | SRR1544576 | 2005 | North America | United States | Enteritidis             | Enteritidis | 8384  | 42988 |

|              |            |            |      |               |               |                         |             |       |       |
|--------------|------------|------------|------|---------------|---------------|-------------------------|-------------|-------|-------|
| SAL_GA3007AA | 389382     | SRR1544575 | 2002 | North America | United States | Enteritidis             | Enteritidis | 1425  | 42987 |
| SAL_GA3008AA | 93-7741    | SRR1544574 | 1993 | North America | United States | Enteritidis             | Enteritidis | 1425  | 42182 |
| SAL_GA3009AA | 93-6175B   | SRR1544552 | 1993 | North America | United States | Enteritidis             | Enteritidis | 1425  | 42180 |
| SAL_GA3010AA | 34986      | SRR1544572 | 1998 |               |               | Enteritidis             | Enteritidis | 1425  | 42644 |
| SAL_GA3011AA | 353306     | SRR1544551 |      |               |               | Enteritidis (Predicted) | Enteritidis | 1425  | 42645 |
| SAL_GA3012AA | S-277      | SRR1544550 | 2008 |               |               | Enteritidis             | Enteritidis | 1425  | 42643 |
| SAL_GA3013AA | J0903      | SRR1544571 | 2001 | North America | United States | Enteritidis             | Enteritidis | 1425  | 42986 |
| SAL_GA3014AA | J0828      | SRR1544549 | 2001 |               |               | Enteritidis             | Enteritidis | 1425  | 42985 |
| SAL_GA3015AA | 76-0331    | SRR1544548 | 1976 | Asia          | Saudi Arabia  | Enteritidis             | Enteritidis | 1425  | 42984 |
| SAL_GA3016AA | 2010K-1554 | SRR1544547 | 2010 | North America | United States | Enteritidis             | Enteritidis | 1425  | 42983 |
| SAL_GA3017AA | 353273     | SRR1544546 |      |               |               | Enteritidis (Predicted) | Enteritidis | 1425  | 42982 |
| SAL_GA3018AA | 353266     | SRR1544545 |      |               |               | Enteritidis (Predicted) | Enteritidis | 1425  | 12130 |
| SAL_GA3019AA | 353262     | SRR1544544 |      |               |               | Enteritidis (Predicted) | Enteritidis | 1425  | 41911 |
| SAL_GA3020AA | UC13       | SRR1544543 | 2009 | North America | United States | Enteritidis             | Enteritidis | 1425  | 42981 |
| SAL_GA3021AA | UC11       | SRR1544579 | 2001 | North America | United States | Enteritidis             | Enteritidis | 1425  | 42980 |
| SAL_GA3022AA | UC10       | SRR1544519 | 2004 | North America | United States | Enteritidis             | Enteritidis | 26543 | 42979 |
| SAL_GA3023AA | UC03       | SRR1544518 | 2005 | North America | United States | Enteritidis             | Enteritidis | 26543 | 42978 |
| SAL_GA3024AA | 9810102B   | SRR1536831 | 1998 | North America | United States | Enteritidis             | Enteritidis | 8384  | 42977 |
| SAL_GA3025AA | 0804789B   | SRR1544539 | 2008 | North America | United States | Enteritidis             | Enteritidis | 1425  | 42975 |
| SAL_GA3026AA | 98-9534    | SRR1544567 | 1998 | North America | United States | Enteritidis             | Enteritidis | 1425  | 42976 |
| SAL_GA3027AA | 93-7922A   | SRR1536830 | 1993 | North America | United States | Enteritidis             | Enteritidis | 1425  | 42974 |
| SAL_GA3028AA | 93-2836A   | SRR1544581 | 1993 | North America | United States | Enteritidis             | Enteritidis | 1425  | 42181 |
| SAL_GA3029AA | 97569      | SRR1544537 | 2010 | North America | United States | Enteritidis             | Enteritidis | 1425  | 13017 |
| SAL_GA3030AA | 61979      | SRR1544536 | 2002 | North America | United States | Enteritidis             | Enteritidis | 26543 | 42973 |
| SAL_GA3031AA | 98961      | SRR1544565 | 2010 | North America | United States | Enteritidis             | Enteritidis | 1425  | 42651 |
| SAL_GA3032AA | 85366      | SRR1544535 | 2007 | North America | United States | Enteritidis             | Enteritidis | 1425  | 42650 |
| SAL_GA3033AA | 78296      | SRR1536828 | 2005 | North America | United States | Enteritidis             | Enteritidis | 1425  | 42643 |
| SAL_GA3034AA | 55795      | SRR1536827 | 2001 | North America | United States | Enteritidis             | Enteritidis | 1425  | 42972 |
| SAL_GA3035AA | S-380      | SRR1536826 | 2008 |               |               | Enteritidis             | Enteritidis | 1425  | 42971 |
| SAL_GA3037AA | 2010K-1832 | SRR1536806 |      |               |               | Enteritidis             | Enteritidis | 1425  | 42969 |
| SAL_GA3038AA | 352039     | SRR1532725 |      |               |               | Enteritidis (Predicted) | Enteritidis | 3888  | 16445 |
| SAL_GA3039AA | 352060     | SRR1532737 |      |               |               | Enteritidis (Predicted) | Enteritidis | 3888  | 42966 |
| SAL_GA3040AA | 352013     | SRR1532734 |      |               |               | Enteritidis (Predicted) | Enteritidis | 1425  | 42967 |
| SAL_GA3041AA | 352034     | SRR1532724 |      |               |               | Enteritidis (Predicted) | Enteritidis | 1425  | 42965 |
| SAL_GA3042AA | 2010K-0268 | SRR1532723 | 2008 | Asia          | Thailand      | Enteritidis             | Enteritidis | 1425  | 42964 |
| SAL_GA3043AA | 2010K-0264 | SRR1532722 | 2008 | Asia          | Thailand      | Enteritidis             | Enteritidis | 1425  | 42963 |
| SAL_GA3044AA | 2010K-0263 | SRR1532719 | 2008 | Asia          | Thailand      | Enteritidis             | Enteritidis | 1425  | 42962 |
| SAL_GA3045AA | 2009K1324  | SRR1532718 | 2009 | North America | United States | Enteritidis             | Enteritidis | 1425  | 42961 |
| SAL_GA3046AA | 2009K-0479 | SRR1532717 |      | Africa        | Uganda        | Enteritidis             | Enteritidis | 1424  | 42960 |
| SAL_GA3047AA | 2009K-0477 | SRR1532716 |      | Africa        | Uganda        | Enteritidis             | Enteritidis | 1424  | 42959 |
| SAL_GA3048AA | 04-0307    | SRR1532714 | 2004 | North America | United States | Enteritidis             | Enteritidis | 1425  | 42958 |
| SAL_GA3049AA | 351981     | SRR1532732 |      |               |               | Enteritidis (Predicted) | Enteritidis | 26543 | 42957 |
| SAL_GA3050AA | 93-0063    | SRR1532731 | 1993 | South America | Puerto Rico   | Enteritidis             | Enteritidis | 1425  | 42956 |
| SAL_GA3051AA | 84-1226    | SRR1532712 | 1984 | North America | United States | Enteritidis             | Enteritidis | 1425  | 42955 |
| SAL_GA3052AA | 351967     | SRR1532710 |      |               |               | Enteritidis (Predicted) | Enteritidis | 1425  | 42953 |
| SAL_GA3053AA | 351960     | SRR1532709 |      |               |               | Enteritidis (Predicted) | Enteritidis | 1425  | 42952 |
| SAL_GA3054AA | 351939     | SRR1532707 |      |               |               | Enteritidis (Predicted) | Enteritidis | 3888  | 42954 |
| SAL_GA3055AA | 351956     | SRR1532578 |      |               |               | Enteritidis (Predicted) | Enteritidis | 3888  | 42951 |
| SAL_GA3056AA | 2010K-0329 | SRR1532577 | 2010 | Africa        | Mauritius     | Enteritidis             | Enteritidis | 1425  | 42950 |
| SAL_GA3057AA | 2010K-0313 | SRR1532576 | 2010 | Africa        | Mauritius     | Enteritidis             | Enteritidis | 1425  | 42949 |
| SAL_GA3058AA | 2010K-0303 | SRR1532730 | 2008 | Asia          | Thailand      | Enteritidis             | Enteritidis | 1425  | 42947 |
| SAL_GA3059AA | 351916     | SRR1532575 |      |               |               | Enteritidis (Predicted) | Enteritidis | 1425  | 42948 |
| SAL_GA3060AA | 351884     | SRR1532574 |      |               |               | Enteritidis (Predicted) | Enteritidis | 1425  | 42946 |
| SAL_GA3061AA | 351880     | SRR1532573 |      |               |               | Enteritidis (Predicted) | Enteritidis | 27775 | 42945 |
| SAL_GA3062AA | 351907     | SRR1532580 |      |               |               | Enteritidis (Predicted) | Enteritidis | 1425  | 42941 |
| SAL_GA3063AA | 351900     | SRR1532729 |      |               |               | Enteritidis (Predicted) | Enteritidis | 1425  | 42940 |
| SAL_GA3064AA | 351896     | SRR1532728 |      |               |               | Enteritidis (Predicted) | Enteritidis | 1425  | 42939 |
| SAL_GA3065AA | 2010K-0271 | SRR1532572 | 2008 | Asia          | Thailand      | Enteritidis             | Enteritidis | 1425  | 42938 |
| SAL_GA3066AA | 2010K-0267 | SRR1532727 | 2008 | Asia          | Thailand      | Enteritidis             | Enteritidis | 1425  | 42937 |



|              |             |            |      |               |               |                         |             |       |       |
|--------------|-------------|------------|------|---------------|---------------|-------------------------|-------------|-------|-------|
| SAL_GA3067AA | 2010K-0262  | SRR1532706 | 2008 | Asia          | Thailand      | Enteritidis             | Enteritidis | 1425  | 42936 |
| SAL_GA3069AA | 2009K-1651  | SRR1532571 | 2009 | North America | United States | Enteritidis             | Enteritidis | 1425  | 42935 |
| SAL_GA3070AA | 2009K-0958  | SRR1532570 | 2009 | North America | United States | Enteritidis             | Enteritidis | 1425  | 42933 |
| SAL_GA3071AA | 351838      | SRR1532726 |      |               |               | Enteritidis (Predicted) | Enteritidis | 1425  | 42932 |
| SAL_GA3091AA | SAL3373     | SRR1132889 | 2007 |               |               | Enteritidis             | Enteritidis | 1425  | 42943 |
| SAL_GA3092AA | SAL3367     | SRR1132890 | 2006 |               |               | Enteritidis             | Enteritidis | 1425  | 42919 |
| SAL_GA3093AA | SAL3366     | SRR1132891 | 2006 |               |               | Enteritidis             | Enteritidis | 26543 | 42918 |
| SAL_GA3094AA | SAL3357     | SRR1132892 | 2005 |               |               | Enteritidis             | Enteritidis | 1425  | 42917 |
| SAL_GA3095AA | SAL3354     | SRR1132893 | 2001 |               |               | Enteritidis             | Enteritidis | 27446 | 42916 |
| SAL_GA3096AA | SAL3350     | SRR1132894 | 2002 |               |               | Enteritidis             | Enteritidis | 1425  | 42915 |
| SAL_GA3097AA | SAL3349     | SRR1132895 | 2002 |               |               | Enteritidis             | Enteritidis | 1425  | 42913 |
| SAL_GA3098AA | SAL3347     | SRR1132896 | 2002 |               |               | Enteritidis             | Enteritidis | 1425  | 42914 |
| SAL_GA3118AA | BCW_3418    | SRR1122490 | 2004 | North America | United States | Enteritidis             | Enteritidis | 1425  | 9568  |
| SAL_GA3119AA | BCW_3417    | SRR1122491 | 2004 | North America | United States | Enteritidis             | Enteritidis | 1425  | 42893 |
| SAL_GA3120AA | NCTR-SF923  | SRR1122492 | 2009 | North America | United States | Enteritidis             | Enteritidis | 1425  | 42892 |
| SAL_GA3132AA | NCTR-SF475  | SRR1122504 | 1999 | North America | United States | Typhimurium             | Enteritidis | 1425  | 42881 |
| SAL_GA3150AA | SAL3399     | SRR1122544 | 2010 |               |               | Enteritidis             | Enteritidis | 1425  | 42857 |
| SAL_GA3151AA | SAL3398     | SRR1122545 | 2010 |               |               | Enteritidis             | Enteritidis | 1425  | 42863 |
| SAL_GA3152AA | SAL3397     | SRR1122546 | 2010 |               |               | Enteritidis             | Enteritidis | 1425  | 42862 |
| SAL_GA3153AA | SAL3388     | SRR1122547 | 2009 |               |               | Enteritidis             | Enteritidis | 1425  | 42861 |
| SAL_GA3154AA | SAL3386     | SRR1122548 | 2009 |               |               | Enteritidis             | Enteritidis | 1425  | 42856 |
| SAL_GA3155AA | SAL3384     | SRR1122549 | 2005 |               |               | Enteritidis             | Enteritidis | 1425  | 42855 |
| SAL_GA3156AA | SAL3383     | SRR1122550 | 2004 |               |               | Enteritidis             | Enteritidis | 1425  | 42854 |
| SAL_GA3157AA | SAL3382     | SRR1122551 | 2009 |               |               | Enteritidis             | Enteritidis | 1425  | 42853 |
| SAL_GA3158AA | SAL3380     | SRR1122552 | 2009 |               |               | Enteritidis             | Enteritidis | 1425  | 42852 |
| SAL_GA3159AA | SAL3378     | SRR1122553 | 2003 |               |               | Enteritidis             | Enteritidis | 1425  | 42851 |
| SAL_GA3160AA | SAL3377     | SRR1122554 | 2003 |               |               | Enteritidis             | Enteritidis | 1425  | 42860 |
| SAL_GA3161AA | SAL3376     | SRR1122555 | 2008 |               |               | Enteritidis             | Enteritidis | 1425  | 42850 |
| SAL_GA3162AA | SAL3375     | SRR1122556 | 2007 |               |               | Enteritidis             | Enteritidis | 1425  | 42849 |
| SAL_GA3163AA | SAL3374     | SRR1122557 | 2007 |               |               | Enteritidis             | Enteritidis | 1425  | 42848 |
| SAL_GA3164AA | CFSAN005945 | SRR1122558 | 2006 |               |               | Enteritidis             | Enteritidis | 1425  | 42847 |
| SAL_GA3165AA | CFSAN005942 | SRR1122559 | 2006 |               |               | Enteritidis             | Enteritidis | 1425  | 42846 |
| SAL_GA3166AA | CFSAN005936 | SRR1122560 | 2005 |               |               | Enteritidis             | Enteritidis | 1425  | 42841 |
| SAL_GA3167AA | CFSAN005928 | SRR1122561 | 2002 |               |               | Enteritidis             | Enteritidis | 1425  | 42845 |
| SAL_GA3168AA | CFSAN005925 | SRR1122562 | 2001 |               |               | Enteritidis             | Enteritidis | 1425  | 42844 |
| SAL_GA3173AA | CFSAN005903 | SRR1122568 | 2002 |               |               | Typhimurium             | Enteritidis | 1425  | 42837 |
| SAL_GA3186AA | N37936      | SRR1122581 | 2011 | North America | United States | Enteritidis             | Enteritidis | 1425  | 42825 |
| SAL_GA3191AA | N37909      | SRR1122586 | 2011 | North America | United States | Enteritidis             | Enteritidis | 1425  | 42820 |
| SAL_GA3210AA | N30639      | SRR1122605 | 2011 | North America | United States | Enteritidis             | Enteritidis | 1425  | 42805 |
| SAL_GA3211AA | N29385      | SRR1122606 | 2011 | North America | United States | Enteritidis             | Enteritidis | 1425  | 42803 |
| SAL_GA3255AA | N23853      | SRR1122651 | 2010 | North America | United States | Enteritidis             | Enteritidis | 1425  | 42761 |
| SAL_GA3263AA | BCW_2048    | SRR1122659 | 2010 | North America | United States | Enteritidis             | Enteritidis | 1425  | 42754 |
| SAL_GA3269AA | BCW_2039    | SRR1122665 | 2010 | North America | United States | Enteritidis             | Enteritidis | 1425  | 42748 |
| SAL_GA3340AA | BCW_1588    | SRR1122738 |      |               |               | Enteritidis             | Enteritidis | 1425  | 42685 |
| SAL_GA3374AA | BCW_2426    | SRR1118722 |      |               |               | Enteritidis             | Enteritidis | 26543 | 42655 |
| SAL_GA3379AA | CFSAN005841 | SRR1106564 | 2010 |               |               | Enteritidis             | Enteritidis | 1425  | 42651 |
| SAL_GA3380AA | CFSAN005840 | SRR1106565 | 2007 |               |               | Enteritidis             | Enteritidis | 1425  | 42650 |
| SAL_GA3381AA | CFSAN005839 | SRR1106566 | 2007 |               |               | 9,12:-:-                | Enteritidis | 1425  | 13017 |
| SAL_GA3382AA | CFSAN005838 | SRR1106567 | 2006 |               |               | Enteritidis             | Enteritidis | 1425  | 42649 |
| SAL_GA3383AA | CFSAN005837 | SRR1106568 | 2010 |               |               | Enteritidis             | Enteritidis | 1425  | 13017 |
| SAL_GA3384AA | CFSAN005836 | SRR1106569 | 2002 |               |               | Enteritidis             | Enteritidis | 26543 | 42648 |
| SAL_GA3385AA | CFSAN005835 | SRR1106570 | 1999 |               |               | Enteritidis             | Enteritidis | 1425  | 41911 |
| SAL_GA3387AA | CFSAN005833 | SRR1106572 | 2002 |               |               | Enteritidis             | Enteritidis | 1425  | 42645 |
| SAL_GA3388AA | CFSAN005832 | SRR1106573 | 1998 |               |               | Enteritidis             | Enteritidis | 1425  | 42644 |
| SAL_GA3389AA | CFSAN005831 | SRR1106574 | 2005 |               |               | Enteritidis             | Enteritidis | 1425  | 42643 |
| SAL_GA3492AA | BCW_2877    | SRR1106360 |      |               |               | Enteritidis             | Enteritidis | 1425  | 42552 |
| SAL_GA3505AA | BCW_2860    | SRR1106373 |      |               |               | Enteritidis             | Enteritidis | 1425  | 42552 |
| SAL_GA3515AA | BCW_2844    | SRR1106383 |      |               |               | Enteritidis             | Enteritidis | 1425  | 42544 |
| SAL_GA3626AA | BCW_2687    | SRR1106494 | 2011 | Asia          | Iran          | Enteritidis             | Enteritidis | 1425  | 42454 |

|              |                          |            |      |   |               |               |                         |             |       |       |
|--------------|--------------------------|------------|------|---|---------------|---------------|-------------------------|-------------|-------|-------|
| SAL_GA3628AA | BCW_2685                 | SRR1106496 | 2009 |   | Africa        | Mauritius     | Enteritidis             | Enteritidis | 3888  | 44275 |
| SAL_GA3629AA | BCW_2684                 | SRR1106497 | 2009 |   | Europe        | Denmark       | Enteritidis             | Enteritidis | 1425  | 42452 |
| SAL_GA3630AA | BCW_2682                 | SRR1106498 | 2006 |   | Asia          | Turkey        | Enteritidis             | Enteritidis | 1425  | 42451 |
| SAL_GA3631AA | BCW_2681                 | SRR1106499 | 2005 |   | Unresolved    | Congo         | Enteritidis             | Enteritidis | 1424  | 42448 |
| SAL_GA3632AA | BCW_2680                 | SRR1106500 | 2002 |   | Asia          | Taiwan        | Enteritidis             | Enteritidis | 1425  | 42450 |
| SAL_GA3633AA | BCW_2679                 | SRR1106501 | 1999 |   | Asia          | China         | Enteritidis             | Enteritidis | 1425  | 42449 |
| SAL_GA3662AA | CFSAN005976              | SRR1060521 | 2010 |   |               |               | Enteritidis             | Enteritidis | 1425  | 42426 |
| SAL_GA3663AA | CFSAN005975              | SRR1060522 | 2010 |   |               |               | Enteritidis             | Enteritidis | 1425  | 44271 |
| SAL_GA3664AA | CFSAN005974              | SRR1060523 | 2010 |   |               |               | Enteritidis             | Enteritidis | 1425  | 42425 |
| SAL_GA3665AA | CFSAN005973              | SRR1060524 | 2010 |   |               |               | Enteritidis             | Enteritidis | 1425  | 44270 |
| SAL_GA3666AA | CFSAN005972              | SRR1060525 | 2010 |   |               |               | Enteritidis             | Enteritidis | 1425  | 42424 |
| SAL_GA3667AA | CFSAN005971              | SRR1060526 | 2010 |   |               |               | Enteritidis             | Enteritidis | 1425  | 14380 |
| SAL_GA3668AA | CFSAN005970              | SRR1060527 | 2010 |   |               |               | Enteritidis             | Enteritidis | 1425  | 42423 |
| SAL_GA3669AA | CFSAN005969              | SRR1060528 | 2010 |   |               |               | Enteritidis             | Enteritidis | 1425  | 42422 |
| SAL_GA3670AA | CFSAN005967              | SRR1060529 | 2009 |   |               |               | Enteritidis             | Enteritidis | 1425  | 42421 |
| SAL_GA3688AA | BCW_2195                 | SRR1060547 | 2011 |   | North America | United States | Enteritidis             | Enteritidis | 1425  | 42406 |
| SAL_GA3795AA | CDC SSU7998              | SRR1060654 |      |   | North America | United States | Enteritidis             | Enteritidis | 1425  | 42318 |
| SAL_GA3847AA | BCW_1587                 | SRR1060706 |      |   |               |               | Enteritidis             | Enteritidis | 1425  | 42278 |
| SAL_GA3898AA | cSen_S8                  | ERR330010  |      |   |               |               | Enteritidis (Predicted) | Enteritidis | 1425  | 42239 |
| SAL_GA3899AA | Sen_S3                   | ERR330009  |      |   |               |               | Enteritidis (Predicted) | Enteritidis | 1425  | 44227 |
| SAL_GA4196AA | SQ0229                   | SRR863224  | 2013 |   | North America | United States | Enteritidis             | Enteritidis | 1425  | 42182 |
| SAL_GA4197AA | SQ0228                   | SRR863223  | 2013 |   | North America | United States | Enteritidis             | Enteritidis | 1425  | 42181 |
| SAL_GA4198AA | SQ0227                   | SRR863221  | 2013 |   | North America | United States | Enteritidis             | Enteritidis | 1425  | 42180 |
| SAL_GA4204AA | Sent-0907R11860          | ERR277243  |      |   |               |               | Enteritidis (Predicted) | Enteritidis | 1425  | 42177 |
| SAL_GA4205AA | Sent-0905R11615          | ERR277242  |      |   |               |               | Enteritidis (Predicted) | Enteritidis | 1425  | 42176 |
| SAL_GA4206AA | Sent-0910R12287          | ERR277241  |      |   |               |               | Enteritidis (Predicted) | Enteritidis | 1425  | 42174 |
| SAL_GA4207AA | Sent-0910R12234          | ERR277240  |      |   |               |               | Enteritidis (Predicted) | Enteritidis | 1425  | 42175 |
| SAL_GA4208AA | Sent-0909R12018          | ERR277239  |      |   |               |               | Enteritidis (Predicted) | Enteritidis | 1425  | 42173 |
| SAL_GA4209AA | Sent-0909R12091          | ERR277238  |      |   |               |               | Enteritidis (Predicted) | Enteritidis | 1425  | 42172 |
| SAL_GA4210AA | Sent-0905R11609          | ERR277237  |      |   |               |               | Enteritidis (Predicted) | Enteritidis | 3888  | 42171 |
| SAL_GA4211AA | Sent-0905R11565          | ERR277236  |      |   |               |               | Enteritidis (Predicted) | Enteritidis | 1425  | 42170 |
| SAL_GA4326AA | PNUSAS002421             | SRR3732333 | 2016 | 4 | North America | United States | Enteritidis             | Enteritidis | 1425  | 447   |
| SAL_GA4331AA | PNUSAS002373             | SRR3732313 |      |   | North America | United States | Enteritidis (Predicted) | Enteritidis | 1425  | 42204 |
| SAL_GA4337AA | PNUSAS002641             | SRR3732286 | 2016 | 5 | North America | United States | Enteritidis             | Enteritidis | 1425  | 42199 |
| SAL_GA4340AA | PNUSAS002666             | SRR3732283 | 2016 | 6 | North America | United States | Enteritidis             | Enteritidis | 1425  | 44222 |
| SAL_GA4345AA | PNUSAS002661             | SRR3732278 |      |   | North America | United States | Enteritidis (Predicted) | Enteritidis | 1425  | 42190 |
| SAL_GA4356AA | 4248_low_coverage_salmon | ERR1513238 |      |   |               |               | Enteritidis (Predicted) | Enteritidis | 1425  | 42233 |
| SAL_GA4382AA | CVM-N23629               | SRR3740193 | 2009 |   | North America | United States | Enteritidis             | Enteritidis | 1425  | 42225 |
| SAL_GA4384AA | CVM-N23580               | SRR3740191 | 2009 |   | North America | United States | I 9,12:Nonmotile        | Enteritidis | 1425  | 42223 |
| SAL_GA4393AA | 2016K-0493               | SRR3743987 |      |   | North America | United States | Enteritidis (Predicted) | Enteritidis | 27863 | 40225 |
| SAL_GA4394AA | 2016K-0492               | SRR3743986 |      |   | North America | United States | Enteritidis (Predicted) | Enteritidis | 27863 | 43070 |
| SAL_GA4401AA | PNUSAS002491             | SRR3743978 | 2016 | 5 | North America | United States | Enteritidis             | Enteritidis | 27863 | 43297 |
| SAL_GA4403AA | PNUSAS002639             | SRR3743976 | 2016 | 6 | North America | United States | Enteritidis             | Enteritidis | 1425  | 180   |
| SAL_GA4404AA | PNUSAS002638             | SRR3743975 |      |   | North America | United States | Enteritidis             | Enteritidis | 1425  | 43295 |
| SAL_GA4405AA | PNUSAS002637             | SRR3743974 | 2016 | 6 | North America | United States | Enteritidis             | Enteritidis | 1425  | 43294 |
| SAL_GA4406AA | PNUSAS002630             | SRR3743973 | 2016 | 6 | North America | United States | Enteritidis             | Enteritidis | 27863 | 40225 |
| SAL_GA4407AA | PNUSAS002629             | SRR3743972 | 2016 | 5 | North America | United States | Enteritidis             | Enteritidis | 1425  | 2668  |
| SAL_GA4408AA | PNUSAS002594             | SRR3743971 | 2016 | 5 | North America | United States | Enteritidis             | Enteritidis | 1425  | 40609 |
| SAL_GA4409AA | PNUSAS002563             | SRR3743970 | 2016 | 5 | North America | United States | Enteritidis             | Enteritidis | 1425  | 43064 |
| SAL_GA4410AA | PNUSAS002562             | SRR3743969 | 2016 | 5 | North America | United States | Enteritidis             | Enteritidis | 1425  | 10271 |
| SAL_GA4411AA | PNUSAS002561             | SRR3743968 |      |   | North America | United States | Enteritidis (Predicted) | Enteritidis | 1425  | 43063 |
| SAL_GA4412AA | PNUSAS002508             | SRR3743967 | 2016 | 5 | North America | United States | Enteritidis             | Enteritidis | 1425  | 180   |
| SAL_GA4413AA | PNUSAS002507             | SRR3743966 |      |   | North America | United States | Enteritidis (Predicted) | Enteritidis | 1425  | 43062 |
| SAL_GA4414AA | PNUSAS002506             | SRR3743965 |      |   | North America | United States | Enteritidis (Predicted) | Enteritidis | 27863 | 43293 |
| SAL_GA4415AA | PNUSAS002505             | SRR3743964 |      |   | North America | United States | Enteritidis (Predicted) | Enteritidis | 1425  | 4151  |
| SAL_GA4416AA | PNUSAS002560             | SRR3743962 |      |   | North America | United States | Enteritidis (Predicted) | Enteritidis | 1425  | 39779 |
| SAL_GA4426AA | 2016K-0466               | SRR3743950 |      |   | North America | United States | Enteritidis (Predicted) | Enteritidis | 37133 | 177   |
| SAL_GA4427AA | PNUSAS002678             | SRR3743949 | 2016 | 6 | North America | United States | Enteritidis             | Enteritidis | 1425  | 43055 |
| SAL_GA4430AA | PNUSAS002675             | SRR3743946 | 2016 | 6 | North America | United States | Enteritidis             | Enteritidis | 1425  | 43052 |

|              |                |                |      |   |  |               |               |                         |             |       |       |
|--------------|----------------|----------------|------|---|--|---------------|---------------|-------------------------|-------------|-------|-------|
| SAL_GA4437AA | PNUSAS002670   | SRR3743939     |      |   |  | North America | United States | Enteritidis (Predicted) | Enteritidis | 27863 | 43044 |
| SAL_GA4445AA | PNUSAS002310   | SRR3743930     | 2016 | 4 |  | North America | United States | Enteritidis             | Enteritidis | 1425  | 43039 |
| SAL_GA4446AA | PNUSAS002477   | SRR3743929     | 2016 | 4 |  | North America | United States | Enteritidis             | Enteritidis | 1425  | 180   |
| SAL_GA4454AA | PNUSAS002215   | SRR3743920     | 2016 | 4 |  | North America | United States | Enteritidis             | Enteritidis | 27863 | 43034 |
| SAL_GA4455AA | PNUSAS002214   | SRR3743919     | 2016 | 4 |  | North America | United States | Enteritidis             | Enteritidis | 1425  | 43033 |
| SAL_GA4456AA | PNUSAS002213   | SRR3743918     | 2016 | 3 |  | North America | United States | Enteritidis             | Enteritidis | 3888  | 43032 |
| SAL_GA4458AA | PNUSAS002209   | SRR3743916     | 2016 | 3 |  | North America | United States | Enteritidis             | Enteritidis | 1425  | 43030 |
| SAL_GA4480AA | NY-N13667      | SRR3745542     | 2007 |   |  | North America | United States | Enteritidis             | Enteritidis | 1425  | 30959 |
| SAL_GA4481AA | PNUSAS001778   | SRR3745466     |      |   |  | North America | United States | Enteritidis (Predicted) | Enteritidis | 1425  | 617   |
| SAL_GA4487AA | I2016009066    | SRR3928693     | 2016 | 6 |  | North America | United States | Enteritidis             | Enteritidis | 1425  | 43276 |
| SAL_GA4545AA | CVM-N23613     | SRR3765177     | 2009 |   |  | North America | United States | Typhimurium Var. O:5-   | Enteritidis | 1425  | 42853 |
| SAL_GA4673AA | 5              | traces-OUIlxwb |      |   |  |               |               | Enteritidis (Predicted) | Enteritidis | 1425  | 44372 |
| SAL_GA4674AA | 6              | traces-OQabEEc |      |   |  |               |               | Enteritidis (Predicted) | Enteritidis | 1425  | 44374 |
| SAL_GA4722AA | FSIS1607046    | SRR3924743     | 2016 |   |  | North America | United States | Enteritidis             | Enteritidis | 1425  | 45726 |
| SAL_GA4739AA | PNUSAS002551   | SRR3898626     |      |   |  | North America | United States | Enteritidis (Predicted) | Enteritidis | 37133 | 45711 |
| SAL_GA4740AA | PNUSAS002550   | SRR3898622     |      |   |  | North America | United States | Enteritidis (Predicted) | Enteritidis | 27924 | 45710 |
| SAL_GA4741AA | PNUSAS002549   | SRR3898621     |      |   |  | North America | United States | Enteritidis (Predicted) | Enteritidis | 1425  | 45709 |
| SAL_GA4742AA | PNUSAS002688   | SRR3898618     |      |   |  | North America | United States | Enteritidis (Predicted) | Enteritidis | 37133 | 177   |
| SAL_GA4743AA | PNUSAS002687   | SRR3898617     |      |   |  | North America | United States | Enteritidis (Predicted) | Enteritidis | 37133 | 45708 |
| SAL_GA4769AA | PNUSAS002836   | SRR3898516     | 2016 | 6 |  | North America | United States | Enteritidis             | Enteritidis | 1425  | 45684 |
| SAL_GA4771AA | PNUSAS002834   | SRR3898482     | 2016 | 6 |  | North America | United States | Enteritidis             | Enteritidis | 1425  | 45683 |
| SAL_GA4781AA | PNUSAS002799   | SRR3898177     |      |   |  | North America | United States | Enteritidis (Predicted) | Enteritidis | 1425  | 45672 |
| SAL_GA4809AA | PNUSAS002779   | SRR3897929     | 2016 | 5 |  | North America | United States | Enteritidis             | Enteritidis | 3888  | 45643 |
| SAL_GA4851AA | I2016009808    | SRR3824141     | 2016 | 6 |  | North America | United States | Enteritidis             | Enteritidis | 1425  | 45554 |
| SAL_GA4852AA | I2016009149    | SRR3824044     | 2016 | 6 |  | North America | United States | Enteritidis             | Enteritidis | 1425  | 40903 |
| SAL_GA4853AA | I2016008662-12 | SRR3824043     | 2016 | 6 |  | North America | United States | Enteritidis             | Enteritidis | 1425  | 45553 |
| SAL_GA4854AA | E2016009720    | SRR3824138     | 2016 | 6 |  | North America | United States | Enteritidis             | Enteritidis | 1425  | 45552 |
| SAL_GA4855AA | E2016009483    | SRR3824040     | 2016 | 6 |  | North America | United States | Enteritidis             | Enteritidis | 1425  | 45551 |
| SAL_GA4856AA | E2016009919    | SRR3824039     | 2016 | 6 |  | North America | United States | Enteritidis             | Enteritidis | 1425  | 45803 |
| SAL_GA4857AA | E2016009870    | SRR3824133     | 2016 | 6 |  | North America | United States | Enteritidis             | Enteritidis | 1425  | 45802 |
| SAL_GA4858AA | E2016009850    | SRR3824132     | 2016 | 6 |  | North America | United States | Enteritidis             | Enteritidis | 34197 | 45550 |
| SAL_GA4859AA | E2016009771    | SRR3824131     | 2016 | 6 |  | North America | United States | Enteritidis             | Enteritidis | 1425  | 45549 |
| SAL_GA4860AA | E2016009765    | SRR3824034     | 2016 | 6 |  | North America | United States | Enteritidis             | Enteritidis | 1425  | 45546 |
| SAL_GA4861AA | E2016009735    | SRR3824033     | 2016 | 6 |  | North America | United States | Enteritidis             | Enteritidis | 27863 | 45795 |
| SAL_GA4862AA | E2016009469    | SRR3824128     | 2016 | 6 |  | North America | United States | Enteritidis             | Enteritidis | 1425  | 45545 |
| SAL_GA4863AA | CFSAN052648    | SRR3824093     | 2016 | 6 |  | North America | United States | Enteritidis             | Enteritidis | 1425  | 45544 |
| SAL_GA4865AA | CFSAN052649    | SRR3824094     | 2016 | 6 |  | North America | United States | Enteritidis             | Enteritidis | 1425  | 45543 |
| SAL_GA4900AA | FSIS1607118    | SRR3928714     | 2016 |   |  | North America | United States | Enteritidis             | Enteritidis | 1425  | 45631 |
| SAL_GA4916AA | E2016010140    | SRR3928752     | 2016 | 6 |  | North America | United States | Enteritidis             | Enteritidis | 1425  | 45620 |
| SAL_GA4917AA | E2016010134    | SRR3928751     | 2016 | 6 |  | North America | United States | Enteritidis             | Enteritidis | 1425  | 45619 |
| SAL_GA4959AA | CFSAN052937    | SRR3929083     | 2016 | 7 |  | North America | United States | Enteritidis             | Enteritidis | 1425  | 45619 |
| SAL_GA4960AA | CFSAN052936    | SRR3929082     | 2016 | 7 |  | North America | United States | Enteritidis             | Enteritidis | 1425  | 45619 |
| SAL_GA5023AA | PNUSAS002821   | SRR3930407     | 2016 | 6 |  | North America | United States | Enteritidis             | Enteritidis | 1425  | 46091 |
| SAL_GA5025AA | PNUSAS002820   | SRR3930405     | 2016 | 5 |  | North America | United States | Enteritidis             | Enteritidis | 1425  | 46089 |
| SAL_GA5026AA | PNUSAS002819   | SRR3930404     | 2016 | 6 |  | North America | United States | Enteritidis             | Enteritidis | 1425  | 46088 |
| SAL_GA5027AA | PNUSAS002818   | SRR3930402     | 2016 | 5 |  | North America | United States | Enteritidis             | Enteritidis | 37133 | 46087 |
| SAL_GA5028AA | PNUSAS002817   | SRR3930401     | 2016 | 5 |  | North America | United States | Enteritidis             | Enteritidis | 1425  | 46085 |
| SAL_GA5029AA | PNUSAS002816   | SRR3930399     | 2016 | 5 |  | North America | United States | Enteritidis             | Enteritidis | 1425  | 46084 |
| SAL_GA5030AA | PNUSAS002815   | SRR3930398     | 2016 | 5 |  | North America | United States | Enteritidis             | Enteritidis | 1425  | 2668  |
| SAL_GA5031AA | PNUSAS002814   | SRR3930397     | 2016 | 5 |  | North America | United States | Enteritidis             | Enteritidis | 1425  | 46083 |
| SAL_GA5032AA | PNUSAS002813   | SRR3930394     | 2016 | 5 |  | North America | United States | Enteritidis             | Enteritidis | 27863 | 43297 |
| SAL_GA5033AA | PNUSAS002812   | SRR3930393     | 2016 | 5 |  | North America | United States | Enteritidis             | Enteritidis | 1425  | 46082 |
| SAL_GA5034AA | PNUSAS002811   | SRR3930392     | 2016 | 5 |  | North America | United States | Enteritidis             | Enteritidis | 1425  | 46076 |
| SAL_GA5035AA | PNUSAS002810   | SRR3930391     | 2016 | 5 |  | North America | United States | Enteritidis             | Enteritidis | 27863 | 46080 |
| SAL_GA5036AA | PNUSAS002559   | SRR3930390     | 2016 | 5 |  | North America | United States | Enteritidis             | Enteritidis | 27863 | 46081 |
| SAL_GA5037AA | PNUSAS002558   | SRR3930389     | 2016 | 5 |  | North America | United States | Enteritidis             | Enteritidis | 27863 | 46079 |
| SAL_GA5038AA | PNUSAS002557   | SRR3930388     | 2016 | 5 |  | North America | United States | Enteritidis             | Enteritidis | 27863 | 46078 |
| SAL_GA5039AA | PNUSAS002556   | SRR3930387     | 2016 | 5 |  | North America | United States | Enteritidis             | Enteritidis | 1425  | 46077 |
| SAL_GA5040AA | PNUSAS002555   | SRR3930385     | 2016 | 4 |  | North America | United States | Enteritidis             | Enteritidis | 1425  | 46075 |

|              |              |            |      |    |               |               |                         |             |       |       |
|--------------|--------------|------------|------|----|---------------|---------------|-------------------------|-------------|-------|-------|
| SAL_GA5041AA | PNUSAS002554 | SRR3930384 | 2016 | 5  | North America | United States | Enteritidis             | Enteritidis | 1425  | 46077 |
| SAL_GA5042AA | PNUSAS002553 | SRR3930383 | 2016 | 5  | North America | United States | Enteritidis             | Enteritidis | 1425  | 46074 |
| SAL_GA5043AA | PNUSAS002552 | SRR3930382 | 2016 | 4  | North America | United States | Enteritidis             | Enteritidis | 1425  | 46071 |
| SAL_GA5046AA | 2016K-0511   | SRR3930379 |      |    | North America | United States | Enteritidis (Predicted) | Enteritidis | 1425  | 46070 |
| SAL_GA5052AA | PNUSAS002695 | SRR3930368 | 2016 | 5  | North America | United States | Enteritidis             | Enteritidis | 1425  | 1026  |
| SAL_GA5053AA | PNUSAS002694 | SRR3930367 | 2016 | 5  | North America | United States | Enteritidis             | Enteritidis | 1425  | 46065 |
| SAL_GA5054AA | PNUSAS002693 | SRR3930366 | 2016 | 5  | North America | United States | Enteritidis             | Enteritidis | 1425  | 46064 |
| SAL_GA5065AA | PNUSAS002683 | SRR3930355 |      |    | North America | United States | Enteritidis (Predicted) | Enteritidis | 1425  | 46060 |
| SAL_GA5066AA | PNUSAS002682 | SRR3930353 |      |    | North America | United States | Enteritidis (Predicted) | Enteritidis | 1425  | 46059 |
| SAL_GA5086AA | PNUSAS002690 | SRR3930269 | 2016 | 5  | North America | United States | Enteritidis             | Enteritidis | 1425  | 46040 |
| SAL_GA5087AA | PNUSAS002849 | SRR3930268 |      |    | North America | United States | Enteritidis (Predicted) | Enteritidis | 1425  | 46039 |
| SAL_GA5088AA | PNUSAS002610 | SRR3930267 |      |    | North America | United States | Enteritidis (Predicted) | Enteritidis | 27944 | 46017 |
| SAL_GA5089AA | PNUSAS002609 | SRR3930266 |      |    | North America | United States | Enteritidis (Predicted) | Enteritidis | 27944 | 46017 |
| SAL_GA5090AA | PNUSAS002608 | SRR3930265 |      |    | North America | United States | Enteritidis (Predicted) | Enteritidis | 27944 | 46038 |
| SAL_GA5091AA | PNUSAS002607 | SRR3930264 |      |    | North America | United States | Enteritidis (Predicted) | Enteritidis | 27944 | 46017 |
| SAL_GA5092AA | PNUSAS002606 | SRR3930263 |      |    | North America | United States | Enteritidis (Predicted) | Enteritidis | 27944 | 46054 |
| SAL_GA5093AA | PNUSAS002605 | SRR3930262 |      |    | North America | United States | Enteritidis (Predicted) | Enteritidis | 1425  | 46016 |
| SAL_GA5094AA | PNUSAS002604 | SRR3930261 |      |    | North America | United States | Enteritidis (Predicted) | Enteritidis | 1425  | 46015 |
| SAL_GA5095AA | PNUSAS002603 | SRR3930260 |      |    | North America | United States | Enteritidis (Predicted) | Enteritidis | 27904 | 46164 |
| SAL_GA5096AA | PNUSAS002602 | SRR3930259 |      |    | North America | United States | Enteritidis (Predicted) | Enteritidis | 1425  | 39578 |
| SAL_GA5097AA | PNUSAS002601 | SRR3930258 |      |    | North America | United States | Enteritidis (Predicted) | Enteritidis | 27904 | 46014 |
| SAL_GA5098AA | PNUSAS002848 | SRR3930256 |      |    | North America | United States | Enteritidis (Predicted) | Enteritidis | 1425  | 46163 |
| SAL_GA5099AA | PNUSAS002600 | SRR3930255 |      |    | North America | United States | Enteritidis (Predicted) | Enteritidis | 1425  | 46005 |
| SAL_GA5100AA | PNUSAS002598 | SRR3930254 |      |    | North America | United States | Enteritidis (Predicted) | Enteritidis | 1425  | 46004 |
| SAL_GA5101AA | PNUSAS002597 | SRR3930253 |      |    | North America | United States | Enteritidis (Predicted) | Enteritidis | 1425  | 39578 |
| SAL_GA5102AA | PNUSAS002596 | SRR3930252 |      |    | North America | United States | Enteritidis (Predicted) | Enteritidis | 1425  | 46003 |
| SAL_GA5114AA | PNUSAS002703 | SRR3930240 | 2016 | 5  | North America | United States | Enteritidis             | Enteritidis | 1425  | 45987 |
| SAL_GA5118AA | PNUSAS002781 | SRR3930236 | 2016 | 5  | North America | United States | Enteritidis             | Enteritidis | 1425  | 45983 |
| SAL_GA5121AA | PNUSAS002698 | SRR3930233 | 2016 | 5  | North America | United States | Enteritidis             | Enteritidis | 1425  | 45980 |
| SAL_GA5124AA | PNUSAS002697 | SRR3930230 | 2016 | 5  | North America | United States | Enteritidis             | Enteritidis | 1425  | 46133 |
| SAL_GA5125AA | PNUSAS002890 | SRR3930229 | 2016 | 5  | North America | United States | Enteritidis             | Enteritidis | 1425  | 45975 |
| SAL_GA5128AA | PNUSAS002887 | SRR3930226 | 2016 | 5  | North America | United States | Enteritidis             | Enteritidis | 1425  | 45973 |
| SAL_GA5130AA | PNUSAS002885 | SRR3930224 | 2016 | 5  | North America | United States | Enteritidis             | Enteritidis | 1425  | 45971 |
| SAL_GA5143AA | PNUSAS002611 | SRR3930211 |      |    | North America | United States | Enteritidis (Predicted) | Enteritidis | 27944 | 45954 |
| SAL_GA5176AA | V-CLASP-D-44 | SRR3933137 | 2013 |    | North America | United States | Enteritidis             | Enteritidis | 1425  | 46287 |
| SAL_GA5180AA | V-CLASP-D-40 | SRR3933133 | 2013 |    | North America | United States | Enteritidis             | Enteritidis | 42163 | 46282 |
| SAL_GA5217AA | V-CLASP-D-05 | SRR3933096 | 2013 |    | North America | United States | Enteritidis             | Enteritidis | 1425  | 46216 |
| SAL_GA5220AA | V-CLASP-D-02 | SRR3933093 | 2012 |    | North America | United States | Enteritidis             | Enteritidis | 1425  | 46214 |
| SAL_GA5257AA | FDA00004494  | SRR3938678 | 2008 | 10 | Asia          | China         | Enteritidis             | Enteritidis | 1425  | 46804 |
| SAL_GA5288AA | CFSAN042921  | SRR4012587 | 2015 | 9  | North America | United States | Enteritidis (Predicted) | Enteritidis | 1425  | 46783 |
| SAL_GA5289AA | CFSAN042920  | SRR4012586 | 2015 | 9  | North America | United States | Enteritidis (Predicted) | Enteritidis | 1425  | 46783 |
| SAL_GA5290AA | CFSAN042919  | SRR3934265 | 2015 | 9  | North America | United States | Enteritidis (Predicted) | Enteritidis | 1425  | 46783 |
| SAL_GA5291AA | CFSAN042918  | SRR3934264 | 2015 | 9  | North America | United States | Enteritidis (Predicted) | Enteritidis | 1425  | 46785 |
| SAL_GA5292AA | CFSAN042917  | SRR4012583 | 2015 | 9  | North America | United States | Enteritidis (Predicted) | Enteritidis | 1425  | 46783 |
| SAL_GA5293AA | CFSAN042916  | SRR3934262 | 2015 | 9  | North America | United States | Enteritidis (Predicted) | Enteritidis | 1425  | 46783 |
| SAL_GA5294AA | CFSAN042915  | SRR4012580 | 2015 | 9  | North America | United States | Enteritidis (Predicted) | Enteritidis | 1425  | 46783 |
| SAL_GA5400AA | PNUSAS002689 | SRR3933711 |      |    | North America | United States | Enteritidis (Predicted) | Enteritidis | 1425  | 447   |
| SAL_GA5406AA | PNUSAS002947 | SRR3933706 | 2016 | 6  | North America | United States | Enteritidis             | Enteritidis | 1425  | 46741 |
| SAL_GA5407AA | PNUSAS002946 | SRR3933705 | 2016 | 6  | North America | United States | Enteritidis             | Enteritidis | 1425  | 2067  |
| SAL_GA5409AA | PNUSAS002945 | SRR3933704 | 2016 | 6  | North America | United States | Enteritidis             | Enteritidis | 1425  | 46739 |
| SAL_GA5410AA | PNUSAS002944 | SRR3933703 | 2016 | 6  | North America | United States | Enteritidis             | Enteritidis | 1425  | 46738 |
| SAL_GA5411AA | PNUSAS002824 | SRR3933702 | 2016 | 5  | North America | United States | Enteritidis             | Enteritidis | 1425  | 46737 |
| SAL_GA5412AA | PNUSAS002823 | SRR3933701 | 2016 | 6  | North America | United States | Enteritidis             | Enteritidis | 1425  | 46735 |
| SAL_GA5413AA | PNUSAS002822 | SRR3933700 | 2016 | 6  | North America | United States | Enteritidis             | Enteritidis | 1425  | 46734 |
| SAL_GA5436AA | PNUSAS002809 | SRR3933690 | 2016 | 6  | North America | United States | Enteritidis             | Enteritidis | 27863 | 46722 |
| SAL_GA5437AA | PNUSAS002808 | SRR3933689 | 2016 | 6  | North America | United States | Enteritidis             | Enteritidis | 27863 | 40225 |
| SAL_GA5438AA | PNUSAS002686 | SRR3933688 | 2016 | 5  | North America | United States | Enteritidis             | Enteritidis | 1425  | 46721 |
| SAL_GA5456AA | PNUSAS002949 | SRR3933673 | 2016 | 6  | North America | United States | Enteritidis             | Enteritidis | 1425  | 46708 |
| SAL_GA5458AA | PNUSAS002625 | SRR3933671 | 2016 | 6  | North America | United States | Enteritidis             | Enteritidis | 1425  | 44222 |

|              |               |            |      |   |               |               |                         |             |       |       |
|--------------|---------------|------------|------|---|---------------|---------------|-------------------------|-------------|-------|-------|
| SAL_GA5465AA | PNUSAS002621  | SRR3933667 | 2016 | 5 | North America | United States | Enteritidis             | Enteritidis | 1425  | 46728 |
| SAL_GA5469AA | PNUSAS002620  | SRR3933666 |      |   | North America | United States | Enteritidis             | Enteritidis | 1425  | 47027 |
| SAL_GA5476AA | PNUSAS002618  | SRR3933664 |      |   | North America | United States | Enteritidis (Predicted) | Enteritidis | 37741 | 46700 |
| SAL_GA5483AA | PNUSAS002615  | SRR3933662 |      |   | North America | United States | Enteritidis (Predicted) | Enteritidis | 1425  | 46694 |
| SAL_GA5488AA | PNUSAS002612  | SRR3933659 | 2016 | 5 | North America | United States | Enteritidis             | Enteritidis | 1425  | 46690 |
| SAL_GA5489AA | PNUSAS002584  | SRR3933658 | 2016 | 5 | North America | United States | Enteritidis             | Enteritidis | 1425  | 46689 |
| SAL_GA5492AA | PNUSAS002581  | SRR3933655 | 2016 | 5 | North America | United States | Enteritidis             | Enteritidis | 27863 | 40225 |
| SAL_GA5494AA | PNUSAS002579  | SRR3933653 | 2016 | 5 | North America | United States | Enteritidis             | Enteritidis | 1425  | 46684 |
| SAL_GA5504AA | PNUSAS002574  | SRR3933648 | 2016 | 5 | North America | United States | Enteritidis             | Enteritidis | 1425  | 46678 |
| SAL_GA5506AA | PNUSAS002692  | SRR3933647 |      |   | North America | United States | Enteritidis (Predicted) | Enteritidis | 1425  | 46677 |
| SAL_GA5509AA | PNUSAS002691  | SRR3933645 |      |   | North America | United States | Enteritidis (Predicted) | Enteritidis | 1425  | 47023 |
| SAL_GA5563AA | CVM N62976    | SRR3933083 | 2015 |   | North America | United States | Enteritidis             | Enteritidis | 1425  | 47016 |
| SAL_GA5581AA | CVM N62524    | SRR3933065 | 2015 |   | North America | United States | Enteritidis             | Enteritidis | 27904 | 46621 |
| SAL_GA5583AA | CVM N62522    | SRR3933063 | 2015 |   | North America | United States | Enteritidis             | Enteritidis | 1425  | 46620 |
| SAL_GA5598AA | CVM N62507    | SRR3933049 | 2015 |   | North America | United States | Enteritidis             | Enteritidis | 1425  | 46611 |
| SAL_GA5616AA | CVM N62486    | SRR3933031 | 2015 |   | North America | United States | Enteritidis             | Enteritidis | 1425  | 46596 |
| SAL_GA5619AA | CVM N62480    | SRR3933028 | 2015 |   | North America | United States | Enteritidis             | Enteritidis | 1425  | 46593 |
| SAL_GA5620AA | CVM N62479    | SRR3933027 | 2015 |   | North America | United States | Enteritidis             | Enteritidis | 1425  | 46588 |
| SAL_GA5626AA | CVM N62472    | SRR3933021 | 2015 |   | North America | United States | Enteritidis             | Enteritidis | 1425  | 46585 |
| SAL_GA5631AA | CVM N62467    | SRR3933016 | 2015 |   | North America | United States | Enteritidis             | Enteritidis | 1425  | 12362 |
| SAL_GA5633AA | CVM N62464    | SRR3933014 | 2015 |   | North America | United States | Enteritidis             | Enteritidis | 1425  | 46580 |
| SAL_GA5637AA | CVM N62460    | SRR3933010 | 2015 |   | North America | United States | Enteritidis             | Enteritidis | 1425  | 46578 |
| SAL_GA5638AA | CVM N62459    | SRR3933009 | 2015 |   | North America | United States | Enteritidis             | Enteritidis | 1425  | 46575 |
| SAL_GA5639AA | CVM N62458    | SRR3933008 | 2015 |   | North America | United States | Enteritidis             | Enteritidis | 1425  | 46574 |
| SAL_GA5646AA | CVM N62451    | SRR3933001 | 2015 |   | North America | United States | Enteritidis             | Enteritidis | 1425  | 46625 |
| SAL_GA5672AA | CVM N58676    | SRR3932975 | 2015 |   | North America | United States | Enteritidis             | Enteritidis | 1425  | 46544 |
| SAL_GA5687AA | CVM N58661    | SRR3932960 | 2015 |   | North America | United States | Enteritidis             | Enteritidis | 1425  | 46528 |
| SAL_GA5688AA | CVM N58660    | SRR3932959 | 2015 |   | North America | United States | Enteritidis             | Enteritidis | 1425  | 46527 |
| SAL_GA5698AA | CVM N58650    | SRR3932949 | 2015 |   | North America | United States | Enteritidis             | Enteritidis | 1425  | 46517 |
| SAL_GA5705AA | CVM N58643    | SRR3932942 | 2015 |   | North America | United States | Enteritidis             | Enteritidis | 27901 | 12216 |
| SAL_GA5735AA | CVM N56556    | SRR3932912 | 2015 |   | North America | United States | Enteritidis             | Enteritidis | 1425  | 46489 |
| SAL_GA5738AA | CVM N56553    | SRR3932909 | 2015 |   | North America | United States | Enteritidis             | Enteritidis | 1425  | 17527 |
| SAL_GA5754AA | CVM N56229    | SRR3932893 | 2015 |   | North America | United States | Enteritidis             | Enteritidis | 1425  | 46470 |
| SAL_GA5760AA | CVM N55863    | SRR3932887 | 2015 |   | North America | United States | Saintpaul               | Enteritidis | 1425  | 46465 |
| SAL_GA5761AA | CVM N55860    | SRR3932886 | 2015 |   | North America | United States | Heidelberg              | Enteritidis | 1425  | 46464 |
| SAL_GA5765AA | CVM N55847    | SRR3932882 | 2015 |   | North America | United States | Enteritidis             | Enteritidis | 1425  | 46461 |
| SAL_GA5924AA | CFSAN053020   | SRR3944461 | 2016 | 7 | North America | United States | Enteritidis             | Enteritidis | 1425  | 47009 |
| SAL_GA5925AA | CFSAN053019   | SRR3944460 | 2016 | 7 | North America | United States | Enteritidis             | Enteritidis | 1425  | 47008 |
| SAL_GA5926AA | CFSAN053018   | SRR3944459 | 2016 | 7 | North America | United States | Enteritidis             | Enteritidis | 1425  | 47007 |
| SAL_GA5952AA | FSIS1607056   | SRR3953436 | 2016 |   | North America | United States | Enteritidis             | Enteritidis | 1425  | 47604 |
| SAL_GA5957AA | FSIS1607057   | SRR3953320 | 2016 |   | North America | United States | Enteritidis             | Enteritidis | 1425  | 47604 |
| SAL_GA5985AA | PNUSAS002216  | SRR3951366 | 2016 | 4 | North America | United States | Enteritidis             | Enteritidis | 27863 | 43034 |
| SAL_GA5987AA | PNUSAS002211  | SRR3951364 | 2016 | 3 | North America | United States | Enteritidis             | Enteritidis | 27863 | 47577 |
| SAL_GA5989AA | PNUSAS002859  | SRR3951360 |      |   | North America | United States | Enteritidis (Predicted) | Enteritidis | 1425  | 1026  |
| SAL_GA5990AA | PNUSAS002858  | SRR3951359 |      |   | North America | United States | Enteritidis (Predicted) | Enteritidis | 1425  | 1026  |
| SAL_GA5999AA | E2016010873   | SRR3948505 | 2016 | 5 | North America | United States | Enteritidis             | Enteritidis | 1425  | 47569 |
| SAL_GA6000AA | E2016010879   | SRR3948504 | 2016 | 7 | North America | United States | Enteritidis             | Enteritidis | 27924 | 47564 |
| SAL_GA6017AA | I2016010304-1 | SRR3948447 | 2016 | 7 | North America | United States | Enteritidis             | Enteritidis | 1425  | 47552 |
| SAL_GA6019AA | E2016010254   | SRR3948445 | 2016 | 7 | North America | United States | Enteritidis             | Enteritidis | 27901 | 47551 |
| SAL_GA6020AA | E2016010234   | SRR3948444 | 2016 | 7 | North America | United States | Enteritidis             | Enteritidis | 1425  | 47550 |
| SAL_GA6021AA | E2016010179   | SRR3948442 | 2016 | 6 | North America | United States | Enteritidis             | Enteritidis | 1425  | 47549 |
| SAL_GA6022AA | I2016010355   | SRR3948441 | 2016 | 7 | North America | United States | Enteritidis             | Enteritidis | 1425  | 47534 |
| SAL_GA6023AA | E2016010377   | SRR3948440 | 2016 | 7 | North America | United States | Enteritidis             | Enteritidis | 42205 | 47548 |
| SAL_GA6047AA | FSIS1607197   | SRR3981176 | 2016 |   | North America | United States | Enteritidis             | Enteritidis | 1425  | 47689 |
| SAL_GA6064AA | PNUSAS002955  | SRR3979115 | 2016 | 6 | North America | United States | Enteritidis             | Enteritidis | 1425  | 47676 |
| SAL_GA6067AA | PNUSAS003018  | SRR3979112 | 2016 | 6 | North America | United States | Enteritidis             | Enteritidis | 1425  | 47673 |
| SAL_GA6068AA | PNUSAS003017  | SRR3979111 | 2016 | 3 | North America | United States | Enteritidis             | Enteritidis | 1425  | 47672 |
| SAL_GA6069AA | PNUSAS003015  | SRR3978852 |      |   | North America | United States | Enteritidis (Predicted) | Enteritidis | 1425  | 47671 |
| SAL_GA6071AA | PNUSAS003113  | SRR3978823 |      |   | North America | United States | Enteritidis (Predicted) | Enteritidis | 27863 | 43297 |

|              |                          |                |      |   |  |               |               |                         |             |       |       |
|--------------|--------------------------|----------------|------|---|--|---------------|---------------|-------------------------|-------------|-------|-------|
| SAL_GA6072AA | PNUSAS003119             | SRR3978768     |      |   |  | North America | United States | Enteritidis (Predicted) | Enteritidis | 1425  | 47667 |
| SAL_GA6073AA | PNUSAS003116             | SRR3978747     | 2016 | 7 |  | North America | United States | Enteritidis             | Enteritidis | 1425  | 47666 |
| SAL_GA6074AA | PNUSAS003118             | SRR3978701     | 2016 | 7 |  | North America | United States | Enteritidis             | Enteritidis | 1425  | 47665 |
| SAL_GA6075AA | PNUSAS003117             | SRR3978686     | 2016 | 6 |  | North America | United States | Enteritidis             | Enteritidis | 1425  | 180   |
| SAL_GA6076AA | PNUSAS003120             | SRR3978450     | 2016 | 7 |  | North America | United States | Enteritidis             | Enteritidis | 1425  | 47664 |
| SAL_GA6079AA | PNUSAS003002             | SRR3978447     | 2016 | 6 |  | North America | United States | Enteritidis             | Enteritidis | 1425  | 47661 |
| SAL_GA6080AA | PNUSAS002948             | SRR3978446     | 2016 | 6 |  | North America | United States | Enteritidis             | Enteritidis | 1425  | 47660 |
| SAL_GA6081AA | PNUSAS002825             | SRR3978445     | 2016 | 6 |  | North America | United States | Enteritidis             | Enteritidis | 1425  | 47659 |
| SAL_GA6092AA | PNUSAS002869             | SRR3978331     |      |   |  | North America | United States | Enteritidis (Predicted) | Enteritidis | 1425  | 10271 |
| SAL_GA6093AA | PNUSAS002967             | SRR3978330     | 2016 | 6 |  | North America | United States | Enteritidis             | Enteritidis | 1425  | 47652 |
| SAL_GA6094AA | PNUSAS002966             | SRR3978329     | 2016 | 6 |  | North America | United States | Enteritidis             | Enteritidis | 1425  | 180   |
| SAL_GA6098AA | PNUSAS002965             | SRR3978325     | 2016 | 6 |  | North America | United States | Enteritidis             | Enteritidis | 1425  | 47651 |
| SAL_GA6100AA | PNUSAS002963             | SRR3978323     | 2016 | 6 |  | North America | United States | Enteritidis             | Enteritidis | 1425  | 47645 |
| SAL_GA6101AA | PNUSAS002962             | SRR3978322     | 2016 | 6 |  | North America | United States | Enteritidis             | Enteritidis | 1425  | 180   |
| SAL_GA6103AA | PNUSAS002961             | SRR3978312     |      |   |  | North America | United States | Enteritidis (Predicted) | Enteritidis | 1425  | 47643 |
| SAL_GA6104AA | PNUSAS002960             | SRR3978311     |      |   |  | North America | United States | Enteritidis (Predicted) | Enteritidis | 1425  | 47642 |
| SAL_GA6105AA | PNUSAS002959             | SRR3978310     |      |   |  | North America | United States | Enteritidis (Predicted) | Enteritidis | 1425  | 47641 |
| SAL_GA6107AA | PNUSAS002957             | SRR3978308     |      |   |  | North America | United States | Enteritidis (Predicted) | Enteritidis | 1425  | 40609 |
| SAL_GA6108AA | PNUSAS002956             | SRR3978291     |      |   |  | North America | United States | Enteritidis (Predicted) | Enteritidis | 1425  | 180   |
| SAL_GA6120AA | PNUSAS002696             | SRR3978279     | 2016 | 5 |  | North America | United States | Enteritidis             | Enteritidis | 1425  | 47590 |
| SAL_GA6121AA | PNUSAS002260             | SRR3978278     | 2016 | 4 |  | North America | United States | Enteritidis             | Enteritidis | 1425  | 47632 |
| SAL_GA6161AA | NSW_SH34                 | traces-OwnSkrv | 2016 | 7 |  | 31 Oceania    | Australia     | Enteritidis             | Enteritidis | 1425  | 39817 |
| SAL_GA6252AA | LSS22_S18_run08_2016     | traces-OgncOuK |      |   |  |               |               | Enteritidis (Predicted) | Enteritidis | 1425  | 47725 |
| SAL_GA6253AA | LSS21_S15_run08_2016     | traces-OWvsMfD |      |   |  |               |               | Enteritidis (Predicted) | Enteritidis | 1425  | 47724 |
| SAL_GA6254AA | LSS23_S21_run08_2016     | traces-OZERIMs |      |   |  |               |               | Enteritidis (Predicted) | Enteritidis | 1425  | 47723 |
| SAL_GA6255AA | LSS20_S12_run08_2016     | traces-OKtdWZw |      |   |  |               |               | Enteritidis (Predicted) | Enteritidis | 1425  | 47722 |
| SAL_GA6256AA | LSS21_S15_raw_run08_2016 | traces-OJwyeTa |      |   |  |               |               | Enteritidis (Predicted) | Enteritidis | 1425  | 47745 |
| SAL_GA6257AA | LSS22_S18_raw_run08_2016 | traces-OPHxeZf |      |   |  |               |               | Enteritidis (Predicted) | Enteritidis | 1425  | 47742 |
| SAL_GA6258AA | LSS23_S21_raw_run08_2016 | traces-0mJtKNn |      |   |  |               |               | Enteritidis (Predicted) | Enteritidis | 1425  | 47743 |
| SAL_GA6259AA | LSS20_S12_raw_run08_2016 | traces-OKIHIZM |      |   |  |               |               | Enteritidis (Predicted) | Enteritidis | 1425  | 47744 |
| SAL_GA6271AA | FSIS1607275              | SRR3995880     | 2016 |   |  | North America | United States | Enteritidis             | Enteritidis | 1425  | 47979 |
| SAL_GA6367AA | 2016K-0576               | SRR3993252     |      |   |  | North America | United States | Enteritidis (Predicted) | Enteritidis | 1425  | 47819 |
| SAL_GA6368AA | 2016K-0575               | SRR3993251     |      |   |  | North America | United States | Enteritidis (Predicted) | Enteritidis | 1425  | 47818 |
| SAL_GA6369AA | 2016K-0578               | SRR3993250     |      |   |  | North America | United States | Enteritidis (Predicted) | Enteritidis | 27863 | 47817 |
| SAL_GA6370AA | 2016K-0574               | SRR3993249     |      |   |  | North America | United States | Enteritidis (Predicted) | Enteritidis | 1425  | 47816 |
| SAL_GA6371AA | 2016K-0573               | SRR3993248     |      |   |  | North America | United States | Enteritidis (Predicted) | Enteritidis | 1425  | 47815 |
| SAL_GA6372AA | 2016K-0577               | SRR3993247     |      |   |  | North America | United States | Enteritidis (Predicted) | Enteritidis | 1425  | 47814 |
| SAL_GA6378AA | FDA00010467              | SRR3991001     | 2013 | 5 |  | North America | United States | Enteritidis (Predicted) | Enteritidis | 1425  | 47808 |
| SAL_GA6384AA | E2016011232              | SRR3990991     | 2016 | 7 |  | North America | United States | Enteritidis             | Enteritidis | 1425  | 47802 |
| SAL_GA6385AA | I2016011230              | SRR3990990     | 2016 | 7 |  | North America | United States | Enteritidis             | Enteritidis | 1425  | 47801 |
| SAL_GA6386AA | E2016011226              | SRR3990989     | 2016 | 7 |  | North America | United States | Enteritidis             | Enteritidis | 1425  | 47800 |
| SAL_GA6387AA | E2016011044              | SRR3990988     | 2016 | 7 |  | North America | United States | Enteritidis             | Enteritidis | 1425  | 47848 |
| SAL_GA6388AA | E2016011020              | SRR3990987     | 2016 | 7 |  | North America | United States | Enteritidis             | Enteritidis | 1425  | 47847 |
| SAL_GA6390AA | E2016011001              | SRR3990984     | 2016 | 7 |  | North America | United States | Enteritidis             | Enteritidis | 1425  | 47794 |
| SAL_GA6412AA | PNUSAS003112             | SRR3996865     | 2016 | 7 |  | North America | United States | Enteritidis             | Enteritidis | 26849 | 47912 |
| SAL_GA6414AA | PNUSAS003155             | SRR3996861     |      |   |  | North America | United States | Enteritidis (Predicted) | Enteritidis | 1425  | 47910 |
| SAL_GA6415AA | PNUSAS003154             | SRR3996860     | 2016 | 5 |  | North America | United States | Enteritidis             | Enteritidis | 1425  | 47910 |
| SAL_GA6416AA | PNUSAS003159             | SRR3996859     | 2016 | 5 |  | North America | United States | Enteritidis             | Enteritidis | 1425  | 47910 |
| SAL_GA6417AA | PNUSAS003158             | SRR3996858     | 2016 | 5 |  | North America | United States | Enteritidis             | Enteritidis | 1425  | 47910 |
| SAL_GA6418AA | PNUSAS003157             | SRR3996857     |      |   |  | North America | United States | Enteritidis (Predicted) | Enteritidis | 1425  | 47910 |
| SAL_GA6419AA | PNUSAS003156             | SRR3996856     | 2016 | 5 |  | North America | United States | Enteritidis             | Enteritidis | 1425  | 47910 |
| SAL_GA6481AA | PNUSAS003100             | SRR3996684     | 2016 | 7 |  | North America | United States | Serotype Pending        | Enteritidis | 1425  | 47838 |
| SAL_GA6482AA | PNUSAS003099             | SRR3996683     |      |   |  | North America | United States | Enteritidis (Predicted) | Enteritidis | 1425  | 47838 |
| SAL_GA6483AA | PNUSAS003098             | SRR3996682     | 2016 | 6 |  | North America | United States | Serotype Pending        | Enteritidis | 1425  | 47837 |
| SAL_GA6484AA | PNUSAS003097             | SRR3996681     |      |   |  | North America | United States | Enteritidis (Predicted) | Enteritidis | 1425  | 47836 |
| SAL_GA6488AA | PNUSAS002857             | SRR3996677     |      |   |  | North America | United States | Enteritidis (Predicted) | Enteritidis | 27944 | 46017 |
| SAL_GA6503AA | PNUSAS002681             | SRR3996659     |      |   |  | North America | United States | Enteritidis (Predicted) | Enteritidis | 1425  | 47779 |
| SAL_GA6537AA | PNUSAS003092             | SRR3996625     | 2016 | 6 |  | North America | United States | Enteritidis             | Enteritidis | 1425  | 47755 |
| SAL_GA6550AA | PNUSAS003129             | SRR4000315     | 2016 | 7 |  | North America | United States | Enteritidis             | Enteritidis | 1425  | 48074 |

|              |                            |            |      |   |               |                |                         |             |       |       |
|--------------|----------------------------|------------|------|---|---------------|----------------|-------------------------|-------------|-------|-------|
| SAL_GA6551AA | PNUSAS003127               | SRR4000314 | 2016 | 7 | North America | United States  | Enteritidis             | Enteritidis | 1425  | 48073 |
| SAL_GA6553AA | PNUSAS002684               | SRR4000312 | 2016 | 4 | North America | United States  | Enteritidis             | Enteritidis | 27863 | 48072 |
| SAL_GA6554AA | PNUSAS003088               | SRR4000311 |      |   | North America | United States  | Enteritidis (Predicted) | Enteritidis | 1425  | 48071 |
| SAL_GA6559AA | PNUSAS003188               | SRR4000306 |      |   | North America | United States  | Enteritidis (Predicted) | Enteritidis | 1425  | 48057 |
| SAL_GA6564AA | PNUSAS003183               | SRR4000281 | 2016 | 7 | North America | United States  | Enteritidis (Predicted) | Enteritidis | 1425  | 6087  |
| SAL_GA6569AA | PNUSAS003173               | SRR4000276 |      |   | North America | United States  | Enteritidis (Predicted) | Enteritidis | 1425  | 36319 |
| SAL_GA6572AA | PNUSAS003170               | SRR4000252 |      |   | North America | United States  | Enteritidis (Predicted) | Enteritidis | 1425  | 48057 |
| SAL_GA6588AA | 2016K-0615                 | SRR4000205 |      |   | North America | United States  | Enteritidis (Predicted) | Enteritidis | 1425  | 48044 |
| SAL_GA6589AA | 2016K-0617                 | SRR4000204 |      |   | North America | United States  | Enteritidis (Predicted) | Enteritidis | 1425  | 48043 |
| SAL_GA6600AA | 2016K-0546                 | SRR4000193 |      |   | North America | United States  | Enteritidis (Predicted) | Enteritidis | 1425  | 39779 |
| SAL_GA6605AA | PNUSAS003014               | SRR4000013 | 2016 | 1 | North America | United States  | Enteritidis             | Enteritidis | 1425  | 48035 |
| SAL_GA6607AA | PNUSAS003111               | SRR4000011 | 2016 | 6 | North America | United States  | Enteritidis             | Enteritidis | 1425  | 48011 |
| SAL_GA6621AA | PNUSAS002968               | SRR3999993 |      |   | North America | United States  | Enteritidis (Predicted) | Enteritidis | 1425  | 48020 |
| SAL_GA6625AA | PNUSAS003082               | SRR3999989 |      |   | North America | United States  | Enteritidis (Predicted) | Enteritidis | 27863 | 48017 |
| SAL_GA6626AA | PNUSAS003080               | SRR3999988 |      |   | North America | United States  | Enteritidis (Predicted) | Enteritidis | 1425  | 48016 |
| SAL_GA6627AA | PNUSAS003077               | SRR3999987 | 2016 | 7 | North America | United States  | Enteritidis             | Enteritidis | 1425  | 48015 |
| SAL_GA6628AA | PNUSAS003076               | SRR3999986 |      |   | North America | United States  | Enteritidis (Predicted) | Enteritidis | 1425  | 48014 |
| SAL_GA6629AA | PNUSAS003013               | SRR3999985 |      |   | North America | United States  | Enteritidis (Predicted) | Enteritidis | 1425  | 39863 |
| SAL_GA6632AA | PNUSAS002599               | SRR3999974 |      |   | North America | United States  | Enteritidis (Predicted) | Enteritidis | 1425  | 48012 |
| SAL_GA6647AA | PNUSAS003044               | SRR3999884 | 2016 | 6 | North America | United States  | Enteritidis             | Enteritidis | 1425  | 48011 |
| SAL_GA6678AA | 48bd2d00-bac1-11e5-9e10-3  | ERR1556250 |      |   |               |                |                         | Enteritidis | 42231 | 48123 |
| SAL_GA6689AA | 485f2e80-bac1-11e5-9e10-3  | ERR1556239 |      |   |               |                | Enteritidis (Predicted) | Enteritidis | 1424  | 48226 |
| SAL_GA6696AA | 47d00de0-bac1-11e5-9e10-3  | ERR1556232 |      |   |               |                | Enteritidis (Predicted) | Enteritidis | 1424  | 48223 |
| SAL_GA6700AA | 47a10ea0-bac1-11e5-9e10-3  | ERR1556228 |      |   |               |                |                         | Enteritidis | 42231 | 48219 |
| SAL_GA6703AA | 47839b90-bac1-11e5-9e10-3  | ERR1556225 |      |   |               |                |                         | Enteritidis | 42231 | 48216 |
| SAL_GA6708AA | 47469290-bac1-11e5-9e10-3  | ERR1556220 |      |   |               |                | Enteritidis (Predicted) | Enteritidis | 1424  | 48215 |
| SAL_GA6729AA | 421eaff0-bac1-11e5-aed5-3c | ERR1556199 |      |   |               |                | Enteritidis (Predicted) | Enteritidis | 1424  | 48205 |
| SAL_GA6741AA | 416f5d20-bac1-11e5-aed5-3  | ERR1556187 |      |   |               |                | Enteritidis (Predicted) | Enteritidis | 3801  | 48193 |
| SAL_GA6754AA | 41046650-bac1-11e5-aed5-3  | ERR1556174 |      |   |               |                | Enteritidis (Predicted) | Enteritidis | 1425  | 48183 |
| SAL_GA6760AA | 40b3ae40-bac1-11e5-aed5-3  | ERR1556168 |      |   |               |                | Enteritidis (Predicted) | Enteritidis | 1425  | 48161 |
| SAL_GA6775AA | 401d61b0-bac1-11e5-aed5-3  | ERR1556153 |      |   |               |                | Enteritidis (Predicted) | Enteritidis | 1425  | 48172 |
| SAL_GA6780AA | 3fe8bd20-bac1-11e5-aed5-3  | ERR1556148 |      |   |               |                | Enteritidis (Predicted) | Enteritidis | 1425  | 48170 |
| SAL_GA6781AA | 3fe25480-bac1-11e5-aed5-3  | ERR1556147 |      |   |               |                | Enteritidis (Predicted) | Enteritidis | 1425  | 48169 |
| SAL_GA6790AA | 3f9fa630-bac1-11e5-aed5-3c | ERR1556138 |      |   |               |                | Enteritidis (Predicted) | Enteritidis | 1425  | 48161 |
| SAL_GA6792AA | 3f8bd010-bac1-11e5-aed5-3  | ERR1556136 |      |   |               |                | Enteritidis (Predicted) | Enteritidis | 1425  | 48161 |
| SAL_GA6814AA | 3fc2be90-bac1-11e5-9e10-3  | ERR1556114 |      |   |               |                | Enteritidis (Predicted) | Enteritidis | 1424  | 48134 |
| SAL_GA6815AA | 3fbc07d0-bac1-11e5-9e10-3  | ERR1556113 |      |   |               |                | Enteritidis (Predicted) | Enteritidis | 1424  | 48143 |
| SAL_GA6818AA | 3f993d90-bac1-11e5-9e10-3  | ERR1556110 |      |   |               |                | Enteritidis (Predicted) | Enteritidis | 1424  | 48140 |
| SAL_GA6820AA | 3f8bd010-bac1-11e5-9e10-3  | ERR1556108 |      |   |               |                | Enteritidis (Predicted) | Enteritidis | 1424  | 48134 |
| SAL_GA6824AA | 3f6c3a20-bac1-11e5-9e10-3  | ERR1556104 |      |   |               |                | Enteritidis (Predicted) | Enteritidis | 1424  | 48130 |
| SAL_GA6825AA | 3f65aa70-bac1-11e5-9e10-3  | ERR1556103 |      |   |               |                | Enteritidis (Predicted) | Enteritidis | 1424  | 48137 |
| SAL_GA6827AA | 3f4f3c40-bac1-11e5-9e10-3c | ERR1556101 |      |   |               |                | Enteritidis (Predicted) | Enteritidis | 1424  | 48135 |
| SAL_GA6829AA | 3f2aeb60-bac1-11e5-9e10-3  | ERR1556099 |      |   |               |                | Enteritidis (Predicted) | Enteritidis | 1424  | 48134 |
| SAL_GA6832AA | 3ed921e0-bac1-11e5-9e10-3  | ERR1556096 |      |   |               |                | Enteritidis (Predicted) | Enteritidis | 1424  | 48131 |
| SAL_GA6834AA | 3eba9d60-bac1-11e5-9e10-3  | ERR1556094 |      |   |               |                | Enteritidis (Predicted) | Enteritidis | 1424  | 48130 |
| SAL_GA6837AA | 3ea65210-bac1-11e5-9e10-3  | ERR1556091 |      |   |               |                | Enteritidis (Predicted) | Enteritidis | 1424  | 48125 |
| SAL_GA6840AA | 3e648e20-bac1-11e5-9e10-3  | ERR1556088 |      |   |               |                |                         | Enteritidis | 42231 | 48123 |
| SAL_GA6982AA | I2016011407                | SRR4014403 | 2016 | 7 | North America | United States  | Enteritidis             | Enteritidis | 1425  | 48473 |
| SAL_GA6983AA | I2016011392                | SRR4014402 | 2016 | 7 | North America | United States  | Enteritidis             | Enteritidis | 1425  | 48472 |
| SAL_GA6984AA | I2016011284                | SRR4014401 | 2016 | 7 | North America | United States  | Enteritidis             | Enteritidis | 1425  | 48471 |
| SAL_GA6985AA | E2016011589                | SRR4022300 | 2016 | 7 | North America | United States  | Enteritidis             | Enteritidis | 1425  | 48470 |
| SAL_GA6986AA | E2016011581                | SRR4014399 | 2016 | 7 | North America | United States  | Enteritidis             | Enteritidis | 8003  | 48469 |
| SAL_GA6987AA | E2016011520                | SRR4014398 | 2016 | 7 | North America | United States  | Enteritidis             | Enteritidis | 1425  | 48468 |
| SAL_GA6988AA | E2016011385                | SRR4014397 | 2016 | 7 | North America | United States  | Enteritidis             | Enteritidis | 27924 | 48467 |
| SAL_GA7176AA | WAPHL-SAL-A01090           | SRR4011134 | 2009 |   | North America | United States  | Enteritidis             | Enteritidis | 1425  | 48316 |
| SAL_GA7178AA | CFSAN025361                | SRR4011123 | 2006 |   | Europe        | United Kingdom | Enteritidis             | Enteritidis | 1425  | 48314 |
| SAL_GA7191AA | PNUSAS003128               | SRR4017862 | 2016 | 7 | North America | United States  | Enteritidis             | Enteritidis | 1425  | 48487 |
| SAL_GA7401AA | 2016K-0622                 | SRR4019599 |      |   | North America | United States  | Enteritidis (Predicted) | Enteritidis | 1425  | 48607 |
| SAL_GA7402AA | 2016K-0623                 | SRR4019598 |      |   | North America | United States  | Enteritidis (Predicted) | Enteritidis | 1425  | 48606 |

|              |                |                |      |   |               |                |                         |             |       |       |
|--------------|----------------|----------------|------|---|---------------|----------------|-------------------------|-------------|-------|-------|
| SAL_GA7403AA | 2016K-0621     | SRR4019597     |      |   | North America | United States  | Enteritidis (Predicted) | Enteritidis | 1425  | 48605 |
| SAL_GA7417AA | CVM-N23645     | SRR4019219     | 2009 |   | North America | United States  | Enteritidis             | Enteritidis | 1425  | 48595 |
| SAL_GA7419AA | CVM-N23611     | SRR4019217     | 2009 |   | North America | United States  | Typhimurium Var. O:5-   | Enteritidis | 1425  | 48594 |
| SAL_GA7450AA | 145002         | traces-ODytmRr |      |   |               |                | Enteritidis (Predicted) | Enteritidis | 1425  | 48634 |
| SAL_GA7457AA | S38            | traces-OCujaGQ |      |   |               |                | Enteritidis (Predicted) | Enteritidis | 1425  | 48637 |
| SAL_GA7460AA | S49            | traces-OPRilU  |      |   |               |                | Enteritidis (Predicted) | Enteritidis | 1425  | 48638 |
| SAL_GA7469AA | PNUSAS003384   | SRR4040231     | 2016 | 7 | North America | United States  | Enteritidis             | Enteritidis | 1425  | 48744 |
| SAL_GA7471AA | PNUSAS003382   | SRR4040229     | 2016 | 7 | North America | United States  | Enteritidis             | Enteritidis | 1425  | 47667 |
| SAL_GA7474AA | PNUSAS003379   | SRR4040134     | 2016 | 7 | North America | United States  | Enteritidis             | Enteritidis | 1425  | 48746 |
| SAL_GA7488AA | PNUSAS003144   | SRR4040099     | 2016 | 7 | North America | United States  | Enteritidis             | Enteritidis | 1425  | 48711 |
| SAL_GA7490AA | PNUSAS003143   | SRR4040097     | 2016 | 7 | North America | United States  | Enteritidis             | Enteritidis | 1425  | 48713 |
| SAL_GA7491AA | PNUSAS003142   | SRR4040096     | 2016 | 7 | North America | United States  | Enteritidis             | Enteritidis | 27924 | 48714 |
| SAL_GA7492AA | PNUSAS003141   | SRR4040095     | 2016 | 7 | North America | United States  | Enteritidis             | Enteritidis | 1425  | 48715 |
| SAL_GA7493AA | PNUSAS003140   | SRR4040094     | 2016 | 7 | North America | United States  | Enteritidis             | Enteritidis | 33238 | 48753 |
| SAL_GA7494AA | PNUSAS003139   | SRR4040093     |      |   | North America | United States  | Enteritidis (Predicted) | Enteritidis | 1425  | 48764 |
| SAL_GA7495AA | PNUSAS003138   | SRR4040092     | 2016 | 7 | North America | United States  | Enteritidis             | Enteritidis | 1425  | 48716 |
| SAL_GA7496AA | PNUSAS003137   | SRR4040091     |      |   | North America | United States  | Enteritidis (Predicted) | Enteritidis | 1425  | 36319 |
| SAL_GA7497AA | PNUSAS003136   | SRR4040090     |      |   | North America | United States  | Enteritidis (Predicted) | Enteritidis | 1425  | 48754 |
| SAL_GA7498AA | PNUSAS003135   | SRR4040089     | 2016 | 7 | North America | United States  | Enteritidis             | Enteritidis | 1425  | 48717 |
| SAL_GA7499AA | PNUSAS003134   | SRR4040088     | 2016 | 7 | North America | United States  | Enteritidis             | Enteritidis | 1425  | 41757 |
| SAL_GA7500AA | PNUSAS003133   | SRR4040087     | 2016 | 7 | North America | United States  | Enteritidis             | Enteritidis | 1425  | 48755 |
| SAL_GA7510AA | PNUSAS003191   | SRR4039937     | 2016 | 7 | North America | United States  | Enteritidis             | Enteritidis | 1425  | 48722 |
| SAL_GA7511AA | PNUSAS003190   | SRR4039936     |      |   | North America | United States  | Enteritidis (Predicted) | Enteritidis | 1425  | 48757 |
| SAL_GA7527AA | PNUSAS003407   | SRR4039920     | 2016 | 6 | North America | United States  | Enteritidis             | Enteritidis | 1425  | 48758 |
| SAL_GA7528AA | PNUSAS003406   | SRR4039919     | 2016 | 6 | North America | United States  | Enteritidis             | Enteritidis | 1425  | 48759 |
| SAL_GA7543AA | CFSAN025372    | SRR4035055     | 2006 |   | Europe        | United Kingdom | Enteritidis             | Enteritidis | 1425  | 48683 |
| SAL_GA7552AA | CFSAN025363    | SRR4035036     | 2006 |   | Europe        | United Kingdom | Enteritidis             | Enteritidis | 1425  | 48665 |
| SAL_GA7553AA | PNUSAS003274   | SRR4032975     | 2016 | 7 | North America | United States  | Enteritidis             | Enteritidis | 1425  | 48689 |
| SAL_GA7555AA | PNUSAS003272   | SRR4032973     | 2016 | 7 | North America | United States  | Enteritidis             | Enteritidis | 1425  | 48667 |
| SAL_GA7556AA | PNUSAS003235   | SRR4032972     | 2016 | 7 | North America | United States  | Enteritidis             | Enteritidis | 1425  | 48668 |
| SAL_GA7557AA | PNUSAS003234   | SRR4032971     | 2016 | 7 | North America | United States  | Enteritidis             | Enteritidis | 1425  | 47667 |
| SAL_GA7558AA | PNUSAS003233   | SRR4032970     | 2016 | 7 | North America | United States  | Enteritidis             | Enteritidis | 1425  | 48669 |
| SAL_GA7559AA | PNUSAS003231   | SRR4032969     | 2016 | 7 | North America | United States  | Enteritidis             | Enteritidis | 1425  | 1171  |
| SAL_GA7563AA | PNUSAS003045   | SRR4032965     |      |   | North America | United States  | Enteritidis (Predicted) | Enteritidis | 1425  | 48011 |
| SAL_GA7585AA | PNUSAS003030   | SRR4032943     |      |   | North America | United States  | Enteritidis (Predicted) | Enteritidis | 1425  | 48698 |
| SAL_GA7586AA | PNUSAS003029   | SRR4032942     |      |   | North America | United States  | Enteritidis (Predicted) | Enteritidis | 1425  | 9330  |
| SAL_GA7587AA | PNUSAS003028   | SRR4032941     | 2016 | 6 | North America | United States  | Enteritidis             | Enteritidis | 1425  | 41535 |
| SAL_GA7588AA | PNUSAS003027   | SRR4032940     | 2016 | 6 | North America | United States  | Enteritidis             | Enteritidis | 1425  | 48699 |
| SAL_GA7592AA | PNUSAS003023   | SRR4032936     |      |   | North America | United States  | Enteritidis (Predicted) | Enteritidis | 1425  | 48656 |
| SAL_GA7648AA | I2016011233-4  | SRR4039117     | 2016 | 7 | North America | United States  | Enteritidis             | Enteritidis | 1425  | 47801 |
| SAL_GA7649AA | E2016011924    | SRR4039116     | 2016 | 8 | North America | United States  | Enteritidis             | Enteritidis | 1425  | 48773 |
| SAL_GA7650AA | E2016011826    | SRR4039115     | 2016 | 8 | North America | United States  | Enteritidis             | Enteritidis | 27904 | 48772 |
| SAL_GA7651AA | E2016011710    | SRR4039114     | 2016 | 7 | North America | United States  | Enteritidis             | Enteritidis | 1425  | 48785 |
| SAL_GA7660AA | 0000-0058-4276 | SRR3932422     | 2016 |   | North America | United States  | Enteritidis (Predicted) | Enteritidis | 1425  | 48858 |
| SAL_GA7662AA | CFSAN037735    | SRR3931884     | 2012 |   | South America | Peru           | Enteritidis             | Enteritidis | 1425  | 48851 |
| SAL_GA7663AA | CFSAN037734    | SRR3931883     | 2012 |   | South America | Peru           | Enteritidis             | Enteritidis | 37736 | 48815 |
| SAL_GA7783AA | 2014AM-0092    | SRR4044679     |      |   | North America | United States  | Enteritidis (Predicted) | Enteritidis | 1425  | 49094 |
| SAL_GA7793AA | 2014AM-3138    | SRR4044669     |      |   | North America | United States  | Enteritidis (Predicted) | Enteritidis | 1425  | 49078 |
| SAL_GA7796AA | 2014AM-2860    | SRR4044666     |      |   | North America | United States  | Enteritidis (Predicted) | Enteritidis | 1425  | 6087  |
| SAL_GA7817AA | 2014AM-1931    | SRR4044645     |      |   | North America | United States  | Enteritidis (Predicted) | Enteritidis | 1425  | 49019 |
| SAL_GA7839AA | 2014AM-1287    | SRR4044607     |      |   | North America | United States  | Enteritidis (Predicted) | Enteritidis | 1425  | 48967 |
| SAL_GA7845AA | 2014AM-2419    | SRR4044601     |      |   | North America | United States  | Enteritidis (Predicted) | Enteritidis | 1425  | 48973 |
| SAL_GA7852AA | 2014AM-1471    | SRR4044594     |      |   | North America | United States  | Enteritidis (Predicted) | Enteritidis | 1425  | 49034 |
| SAL_GA7871AA | 2014AM-0031    | SRR4044572     |      |   | North America | United States  | Enteritidis (Predicted) | Enteritidis | 1425  | 48991 |
| SAL_GA7895AA | 2014AM-2432    | SRR4044548     |      |   | North America | United States  | Enteritidis (Predicted) | Enteritidis | 1425  | 18562 |
| SAL_GA7898AA | 2014AM-1262    | SRR4044545     |      |   | North America | United States  | Enteritidis (Predicted) | Enteritidis | 1425  | 15690 |
| SAL_GA7919AA | 2014AM-3014    | SRR4044462     |      |   | North America | United States  | Enteritidis (Predicted) | Enteritidis | 1425  | 48878 |
| SAL_GA7921AA | 2014AM-0326    | SRR4044460     |      |   | North America | United States  | Enteritidis (Predicted) | Enteritidis | 1425  | 48880 |
| SAL_GA7930AA | 2014AM-1221    | SRR4044450     |      |   | North America | United States  | Enteritidis (Predicted) | Enteritidis | 1425  | 48888 |



|              |               |            |  |      |               |                |                         |             |      |       |
|--------------|---------------|------------|--|------|---------------|----------------|-------------------------|-------------|------|-------|
| SAL_GA7936AA | 2014AM-2250   | SRR4044444 |  |      | North America | United States  | Enteritidis (Predicted) | Enteritidis | 1425 | 48893 |
| SAL_GA7940AA | 2014AM-1380   | SRR4044437 |  |      | North America | United States  | Enteritidis (Predicted) | Enteritidis | 1425 | 48897 |
| SAL_GA7943AA | 2014AM-0119   | SRR4044433 |  |      | North America | United States  | Enteritidis (Predicted) | Enteritidis | 1425 | 48902 |
| SAL_GA7960AA | 2014AM-2749   | SRR4044416 |  |      | North America | United States  | Enteritidis (Predicted) | Enteritidis | 1425 | 48918 |
| SAL_GA7962AA | 2014AM-2382   | SRR4044414 |  |      | North America | United States  | Enteritidis (Predicted) | Enteritidis | 1425 | 48920 |
| SAL_GA7984AA | 2014AM-1070   | SRR4044376 |  |      | North America | United States  | Enteritidis (Predicted) | Enteritidis | 3888 | 48940 |
| SAL_GA7988AA | 2014AM-2576   | SRR4044372 |  |      | North America | United States  | Enteritidis (Predicted) | Enteritidis | 1425 | 48946 |
| SAL_GA7991AA | 2014AM-0970   | SRR4044369 |  |      | North America | United States  | Enteritidis (Predicted) | Enteritidis | 1425 | 48949 |
| SAL_GA8027AA | FSIS1607405   | SRR4050212 |  | 2016 | North America | United States  | Enteritidis             | Enteritidis | 1425 | 49196 |
| SAL_GA8038AA | I2016011767   | SRR4048576 |  | 2016 | North America | United States  | Enteritidis             | Enteritidis | 1425 | 49207 |
| SAL_GA8042AA | FDA00010338   | SRR4048542 |  | 2001 | Asia          | Taiwan         | Enteritidis (Predicted) | Enteritidis | 1425 | 49228 |
| SAL_GA8043AA | FDA00010337   | SRR4048541 |  | 2001 | Asia          | Taiwan         | Enteritidis (Predicted) | Enteritidis | 1425 | 49211 |
| SAL_GA8044AA | FDA00010336   | SRR4048540 |  | 2001 | Asia          | Taiwan         | Enteritidis (Predicted) | Enteritidis | 1425 | 49230 |
| SAL_GA8073AA | PNUSAS003386  | SRR4047008 |  | 2016 | North America | United States  | Enteritidis             | Enteritidis | 1425 | 49240 |
| SAL_GA8088AA | PNUSAS003441  | SRR4046993 |  |      | North America | United States  | Enteritidis (Predicted) | Enteritidis | 1425 | 49135 |
| SAL_GA8090AA | PNUSAS003437  | SRR4046991 |  |      | North America | United States  | Enteritidis (Predicted) | Enteritidis | 1425 | 6085  |
| SAL_GA8096AA | PNUSAS003357  | SRR4046985 |  | 2016 | North America | United States  | Enteritidis             | Enteritidis | 1425 | 49138 |
| SAL_GA8152AA | WAPHSALA01152 | SRR4046495 |  | 2016 | North America | United States  | Enteritidis             | Enteritidis | 1425 | 49257 |
| SAL_GA8153AA | ADRD_L_R14    | SRR4046494 |  | 2015 | North America | United States  | Enteritidis (Predicted) | Enteritidis | 1425 | 49258 |
| SAL_GA8193AA | PNUSAS003527  | SRR4054690 |  |      | North America | United States  | Enteritidis (Predicted) | Enteritidis | 1425 | 49214 |
| SAL_GA8194AA | PNUSAS003525  | SRR4054689 |  | 2016 | North America | United States  | Enteritidis             | Enteritidis | 1425 | 49254 |
| SAL_GA8206AA | PNUSAS003440  | SRR4054677 |  |      | North America | United States  | Enteritidis (Predicted) | Enteritidis | 1425 | 49220 |
| SAL_GA8221AA | ADRD_L_R113   | SRR4054819 |  | 2016 | North America | United States  | Enteritidis (Predicted) | Enteritidis | 1425 | 49226 |
| SAL_GA8292AA | 157055        | SRR4063757 |  | 2015 | Europe        | United Kingdom | Salmonella Enteritidis  | Enteritidis | 3888 | 1717  |
| SAL_GA8294AA | 199925        | SRR4063755 |  | 2015 | Europe        | United Kingdom | Salmonella Enteritidis  | Enteritidis | 3888 | 3621  |
| SAL_GA8295AA | 172513        | SRR4063754 |  | 2015 | Europe        | United Kingdom | Salmonella Enteritidis  | Enteritidis | 3888 | 49375 |
| SAL_GA8296AA | 180544        | SRR4063753 |  | 2015 | Europe        | United Kingdom | Salmonella Enteritidis  | Enteritidis | 1425 | 49361 |
| SAL_GA8297AA | 205599        | SRR4063752 |  | 2016 | Europe        | United Kingdom | Salmonella Enteritidis  | Enteritidis | 3888 | 3621  |
| SAL_GA8298AA | 137133        | SRR4063751 |  | 2015 | Europe        | United Kingdom | Salmonella Enteritidis  | Enteritidis | 1425 | 1396  |
| SAL_GA8299AA | 193395        | SRR4063750 |  | 2015 | Europe        | United Kingdom | Salmonella Enteritidis  | Enteritidis | 3888 | 3621  |
| SAL_GA8300AA | 155741        | SRR4063749 |  | 2015 | Europe        | United Kingdom | Salmonella Enteritidis  | Enteritidis | 1425 | 49372 |
| SAL_GA8301AA | 106568        | SRR4063748 |  | 2015 | Europe        | United Kingdom | Salmonella Enteritidis  | Enteritidis | 3888 | 49364 |
| SAL_GA8302AA | 143657        | SRR4063747 |  | 2015 | Europe        | United Kingdom | Salmonella Enteritidis  | Enteritidis | 3888 | 3629  |
| SAL_GA8303AA | 136739        | SRR4063746 |  | 2015 | Europe        | United Kingdom | Salmonella Enteritidis  | Enteritidis | 3888 | 3621  |
| SAL_GA8304AA | 107756        | SRR4063745 |  | 2015 | Europe        | United Kingdom | Salmonella Enteritidis  | Enteritidis | 3888 | 49365 |
| SAL_GA8305AA | 179663        | SRR4063744 |  | 2015 | Europe        | United Kingdom | Salmonella Enteritidis  | Enteritidis | 1425 | 49339 |
| SAL_GA8306AA | 190784        | SRR4063743 |  | 2015 | Europe        | United Kingdom | Salmonella Enteritidis  | Enteritidis | 1425 | 49362 |
| SAL_GA8307AA | 197076        | SRR4063742 |  | 2015 | Europe        | United Kingdom | Salmonella Enteritidis  | Enteritidis | 3888 | 3623  |
| SAL_GA8308AA | 204443        | SRR4063741 |  | 2016 | Europe        | United Kingdom | Salmonella Enteritidis  | Enteritidis | 3888 | 49363 |
| SAL_GA8309AA | 134048        | SRR4063740 |  | 2015 | Europe        | United Kingdom | Salmonella Enteritidis  | Enteritidis | 3888 | 49366 |
| SAL_GA8310AA | 186571        | SRR4063739 |  | 2015 | Europe        | United Kingdom | Salmonella Enteritidis  | Enteritidis | 3888 | 49354 |
| SAL_GA8311AA | 142221        | SRR4063738 |  | 2015 | Europe        | United Kingdom | Salmonella Enteritidis  | Enteritidis | 3888 | 49337 |
| SAL_GA8312AA | 207568        | SRR4063737 |  | 2016 | Europe        | United Kingdom | Salmonella Enteritidis  | Enteritidis | 3888 | 49336 |
| SAL_GA8313AA | 170333        | SRR4063736 |  | 2015 | Europe        | United Kingdom | Salmonella Enteritidis  | Enteritidis | 3888 | 49343 |
| SAL_GA8314AA | 157288        | SRR4063735 |  | 2015 | Europe        | United Kingdom | Salmonella Enteritidis  | Enteritidis | 1425 | 49352 |
| SAL_GA8315AA | 184418        | SRR4063734 |  | 2015 | Europe        | United Kingdom | Salmonella Enteritidis  | Enteritidis | 3888 | 49341 |
| SAL_GA8316AA | 227002        | SRR4063733 |  | 2016 | Europe        | United Kingdom | Salmonella Enteritidis  | Enteritidis | 3888 | 43032 |
| SAL_GA8317AA | 146204        | SRR4063732 |  | 2015 | Europe        | United Kingdom | Salmonella Enteritidis  | Enteritidis | 3888 | 49353 |
| SAL_GA8318AA | 143656        | SRR4063731 |  | 2015 | Europe        | United Kingdom | Salmonella Enteritidis  | Enteritidis | 3888 | 3630  |
| SAL_GA8319AA | 119477        | SRR4063730 |  | 2015 | Europe        | United Kingdom | Salmonella Enteritidis  | Enteritidis | 3888 | 49335 |
| SAL_GA8320AA | 155655        | SRR4063729 |  | 2015 | Europe        | United Kingdom | Salmonella Enteritidis  | Enteritidis | 3888 | 2002  |
| SAL_GA8321AA | 160816        | SRR4063728 |  | 2015 | Europe        | United Kingdom | Salmonella Enteritidis  | Enteritidis | 3888 | 49346 |
| SAL_GA8322AA | 210002        | SRR4063727 |  | 2016 | Europe        | United Kingdom | Salmonella Enteritidis  | Enteritidis | 3888 | 49340 |
| SAL_GA8323AA | 116574        | SRR4063726 |  | 2015 | Europe        | United Kingdom | Salmonella Enteritidis  | Enteritidis | 3888 | 3633  |
| SAL_GA8324AA | 208919        | SRR4063725 |  | 2016 | Europe        | United Kingdom | Salmonella Enteritidis  | Enteritidis | 3888 | 2002  |
| SAL_GA8325AA | 143565        | SRR4063724 |  | 2015 | Europe        | United Kingdom | Salmonella Enteritidis  | Enteritidis | 3888 | 49345 |
| SAL_GA8326AA | 196410        | SRR4063723 |  | 2015 | Europe        | United Kingdom | Salmonella Enteritidis  | Enteritidis | 3888 | 3621  |
| SAL_GA8327AA | 146114        | SRR4063722 |  | 2015 | Europe        | United Kingdom | Salmonella Enteritidis  | Enteritidis | 1425 | 49356 |
| SAL_GA8328AA | 153188        | SRR4063721 |  | 2015 | Europe        | United Kingdom | Salmonella Enteritidis  | Enteritidis | 3900 | 49344 |

|              |               |                |      |    |               |                |                         |             |       |       |
|--------------|---------------|----------------|------|----|---------------|----------------|-------------------------|-------------|-------|-------|
| SAL_GA8329AA | 184488        | SRR4063720     | 2015 | 11 | Europe        | United Kingdom | Salmonella Enteritidis  | Enteritidis | 44479 | 49342 |
| SAL_GA8330AA | 133208        | SRR4063719     | 2015 | 7  | Europe        | United Kingdom | Salmonella Enteritidis  | Enteritidis | 3888  | 49349 |
| SAL_GA8331AA | 161939        | SRR4063718     | 2015 | 9  | Europe        | United Kingdom | Salmonella Enteritidis  | Enteritidis | 3888  | 49347 |
| SAL_GA8332AA | 45238         | SRR4063717     | 2014 | 9  | Europe        | United Kingdom | Salmonella Enteritidis  | Enteritidis | 3888  | 28683 |
| SAL_GA8333AA | 109884        | SRR4063716     | 2015 | 5  | Europe        | United Kingdom | Salmonella Enteritidis  | Enteritidis | 3888  | 49357 |
| SAL_GA8334AA | 149329        | SRR4063715     | 2015 | 8  | Europe        | United Kingdom | Salmonella Enteritidis  | Enteritidis | 3888  | 49367 |
| SAL_GA8335AA | 193389        | SRR4063714     | 2015 | 12 | Europe        | United Kingdom | Salmonella Enteritidis  | Enteritidis | 3888  | 49338 |
| SAL_GA8336AA | 161087        | SRR4063713     | 2015 | 9  | Europe        | United Kingdom | Salmonella Enteritidis  | Enteritidis | 1425  | 49350 |
| SAL_GA8337AA | 168370        | SRR4063712     | 2015 | 9  | Europe        | United Kingdom | Salmonella Enteritidis  | Enteritidis | 3982  | 49348 |
| SAL_GA8338AA | 160805        | SRR4063711     | 2015 | 9  | Europe        | United Kingdom | Salmonella Enteritidis  | Enteritidis | 3888  | 49351 |
| SAL_GA8339AA | 222583        | SRR4063710     | 2016 | 2  | Europe        | United Kingdom | Salmonella Enteritidis  | Enteritidis | 3888  | 49355 |
| SAL_GA8340AA | 205621        | SRR4063709     | 2016 | 1  | Europe        | United Kingdom | Salmonella Enteritidis  | Enteritidis | 3888  | 49358 |
| SAL_GA8341AA | 119438        | SRR4063708     | 2015 | 6  | Europe        | United Kingdom | Salmonella Enteritidis  | Enteritidis | 1425  | 49371 |
| SAL_GA8342AA | 169613        | SRR4063707     | 2015 | 9  | Europe        | United Kingdom | Salmonella Enteritidis  | Enteritidis | 3888  | 49377 |
| SAL_GA8343AA | 122198        | SRR4063706     | 2015 | 6  | Europe        | United Kingdom | Salmonella Enteritidis  | Enteritidis | 3888  | 49376 |
| SAL_GA8344AA | 224042        | SRR4063705     | 2016 | 2  | Europe        | United Kingdom | Salmonella Enteritidis  | Enteritidis | 3888  | 2002  |
| SAL_GA8345AA | 202277        | SRR4063704     | 2016 | 1  | Europe        | United Kingdom | Enteritidis             | Enteritidis | 3888  | 49374 |
| SAL_GA8346AA | 155644        | SRR4063703     | 2015 | 9  | Europe        | United Kingdom | Salmonella Enteritidis  | Enteritidis | 1425  | 49368 |
| SAL_GA8347AA | 182866        | SRR4063702     | 2015 | 11 | Europe        | United Kingdom | Salmonella Enteritidis  | Enteritidis | 3888  | 49369 |
| SAL_GA8348AA | 149393        | SRR4063701     | 2015 | 8  | Europe        | United Kingdom | Salmonella Enteritidis  | Enteritidis | 3888  | 49373 |
| SAL_GA8349AA | 217038        | SRR4063700     | 2016 | 2  | Europe        | United Kingdom | Salmonella Enteritidis  | Enteritidis | 3888  | 49359 |
| SAL_GA8350AA | 209719        | SRR4063699     | 2016 | 1  | Europe        | United Kingdom | Salmonella Enteritidis  | Enteritidis | 3888  | 49359 |
| SAL_GA8351AA | 208718        | SRR4063698     | 2016 | 1  | Europe        | United Kingdom | Salmonella Enteritidis  | Enteritidis | 3888  | 49370 |
| SAL_GA8352AA | 160811        | SRR4063697     | 2015 | 9  | Europe        | United Kingdom | Salmonella Enteritidis  | Enteritidis | 1425  | 49360 |
| SAL_GA8396AA | S/20160014    | traces-OWdpQqP | 2014 | 7  | 1 Europe      | United Kingdom | Enteritidis             | Enteritidis | 3941  | 49388 |
| SAL_GA8397AA | S/20160818    | traces-0ZwFmHg | 2016 | 7  | 31 Europe     | United Kingdom | Enteritidis             | Enteritidis | 3888  | 49389 |
| SAL_GA8480AA | E2016012184   | SRR4095259     | 2016 | 8  | North America | United States  | Enteritidis             | Enteritidis | 7801  | 49495 |
| SAL_GA8481AA | E2016012152   | SRR4095258     | 2016 | 8  | North America | United States  | Enteritidis             | Enteritidis | 1425  | 49491 |
| SAL_GA8482AA | E2016012118   | SRR4095257     | 2016 | 8  | North America | United States  | Enteritidis             | Enteritidis | 33238 | 49476 |
| SAL_GA8483AA | E2016012117   | SRR4095256     | 2016 | 8  | North America | United States  | Enteritidis             | Enteritidis | 33238 | 49493 |
| SAL_GA8493AA | ADRD_L_R47    | SRR4093302     | 2015 | 9  | North America | United States  | Enteritidis (Predicted) | Enteritidis | 1425  | 17527 |
| SAL_GA8510AA | 227047        | SRR4073160     | 2016 | 3  | Europe        | United Kingdom | Salmonella Enteritidis  | Enteritidis | 3888  | 49416 |
| SAL_GA8511AA | 215119        | SRR4073159     | 2016 | 2  | Europe        | United Kingdom | Salmonella Enteritidis  | Enteritidis | 3888  | 2002  |
| SAL_GA8512AA | 161949        | SRR4073158     | 2015 | 9  | Europe        | United Kingdom | Salmonella Enteritidis  | Enteritidis | 3888  | 49417 |
| SAL_GA8513AA | 127551        | SRR4073157     | 2015 | 6  | Europe        | United Kingdom | Salmonella Enteritidis  | Enteritidis | 3888  | 49418 |
| SAL_GA8514AA | 166234        | SRR4073156     | 2015 | 9  | Europe        | United Kingdom | Salmonella Enteritidis  | Enteritidis | 3888  | 49419 |
| SAL_GA8515AA | 161868        | SRR4073155     | 2015 | 9  | Europe        | United Kingdom | Salmonella Enteritidis  | Enteritidis | 3888  | 49420 |
| SAL_GA8516AA | 199845        | SRR4073154     | 2015 | 12 | Europe        | United Kingdom | Salmonella Enteritidis  | Enteritidis | 3888  | 49421 |
| SAL_GA8517AA | 205741        | SRR4073153     | 2016 | 1  | Europe        | United Kingdom | Salmonella Enteritidis  | Enteritidis | 1425  | 49422 |
| SAL_GA8518AA | 195750        | SRR4073152     | 2015 | 12 | Europe        | United Kingdom | Enteritidis             | Enteritidis | 3888  | 49456 |
| SAL_GA8519AA | 182178        | SRR4073151     | 2015 | 11 | Europe        | United Kingdom | Salmonella Enteritidis  | Enteritidis | 1425  | 49484 |
| SAL_GA8520AA | IA-2011107414 | SRR4069571     | 2011 | 9  | North America | United States  | Enteritidis             | Enteritidis | 1425  | 49423 |
| SAL_GA8528AA | IA-2010126614 | SRR4069563     | 2010 | 10 | North America | United States  | Enteritidis             | Enteritidis | 1425  | 49428 |
| SAL_GA8544AA | IA_2011111840 | SRR4069544     | 2011 | 10 | North America | United States  | Enteritidis             | Enteritidis | 1425  | 49442 |
| SAL_GA8545AA | IA_2011125013 | SRR4069543     | 2011 | 11 | North America | United States  | Enteritidis             | Enteritidis | 1425  | 49443 |
| SAL_GA8547AA | PNUSAS003447  | SRR4100165     | 2016 | 6  | North America | United States  | Enteritidis             | Enteritidis | 3888  | 49509 |
| SAL_GA8548AA | PNUSAS003446  | SRR4100164     | 2016 | 6  | North America | United States  | Enteritidis             | Enteritidis | 1425  | 49520 |
| SAL_GA8549AA | PNUSAS003445  | SRR4100163     | 2016 | 6  | North America | United States  | Enteritidis             | Enteritidis | 1425  | 49521 |
| SAL_GA8550AA | PNUSAS003444  | SRR4100162     | 2016 | 6  | North America | United States  | Enteritidis             | Enteritidis | 1425  | 49508 |
| SAL_GA8551AA | PNUSAS003443  | SRR4100152     |      |    | North America | United States  | Enteritidis (Predicted) | Enteritidis | 1425  | 49528 |
| SAL_GA8552AA | PNUSAS003442  | SRR4100151     | 2016 | 5  | North America | United States  | Enteritidis             | Enteritidis | 1425  | 49527 |
| SAL_GA8554AA | PNUSAS003375  | SRR4100149     |      |    | North America | United States  | Enteritidis (Predicted) | Enteritidis | 1425  | 49525 |
| SAL_GA8559AA | PNUSAS003370  | SRR4100144     |      |    | North America | United States  | Enteritidis (Predicted) | Enteritidis | 1425  | 49539 |
| SAL_GA8582AA | PNUSAS003428  | SRR4099288     | 2016 | 7  | North America | United States  | Enteritidis             | Enteritidis | 1425  | 49501 |
| SAL_GA8599AA | FDA00009522   | SRR4098705     | 2015 | 10 | North America | United States  | Enteritidis (Predicted) | Enteritidis | 1425  | 49499 |
| SAL_GA8624AA | PNUSAS003427  | SRR4101379     | 2016 | 7  | North America | United States  | Enteritidis             | Enteritidis | 1425  | 49550 |
| SAL_GA8625AA | PNUSAS003426  | SRR4101378     | 2016 | 7  | North America | United States  | Enteritidis             | Enteritidis | 1425  | 47848 |
| SAL_GA8626AA | PNUSAS003425  | SRR4101377     | 2016 | 7  | North America | United States  | Enteritidis             | Enteritidis | 1425  | 49587 |
| SAL_GA8627AA | PNUSAS003424  | SRR4101376     | 2016 | 7  | North America | United States  | Enteritidis             | Enteritidis | 1425  | 49588 |

|              |               |                |      |   |               |                |                         |             |       |       |
|--------------|---------------|----------------|------|---|---------------|----------------|-------------------------|-------------|-------|-------|
| SAL_GA8628AA | PNUSAS003423  | SRR4101375     | 2016 | 7 | North America | United States  | Enteritidis             | Enteritidis | 1425  | 49591 |
| SAL_GA8629AA | PNUSAS003422  | SRR4101374     |      |   | North America | United States  | Enteritidis (Predicted) | Enteritidis | 1425  | 49566 |
| SAL_GA8637AA | PNUSAS003533  | SRR4101366     | 2016 | 7 | North America | United States  | Enteritidis             | Enteritidis | 1425  | 49570 |
| SAL_GA8639AA | PNUSAS003518  | SRR4101362     | 2016 | 7 | North America | United States  | Enteritidis             | Enteritidis | 1425  | 49546 |
| SAL_GA8640AA | PNUSAS003517  | SRR4101361     |      |   | North America | United States  | Enteritidis (Predicted) | Enteritidis | 1425  | 49548 |
| SAL_GA8652AA | PNUSAS003506  | SRR4101350     |      |   | North America | United States  | Enteritidis             | Enteritidis | 1425  | 49559 |
| SAL_GA8671AA | PNUSAS003263  | SRR4101262     |      |   | North America | United States  | Enteritidis (Predicted) | Enteritidis | 1425  | 49589 |
| SAL_GA8679AA | H124521395    | traces-OBUHFLa |      |   |               |                | Enteritidis             | Enteritidis | 1425  | 26091 |
| SAL_GA8744AA | CFSANO25377   | SRR4120114     | 2006 |   | Europe        | United Kingdom | Enteritidis             | Enteritidis | 1425  | 49647 |
| SAL_GA8777AA | PNUSAS003472  | SRR4176769     | 2016 | 7 | North America | United States  | Enteritidis             | Enteritidis | 1425  | 49686 |
| SAL_GA8778AA | PNUSAS003471  | SRR4176768     | 2016 | 7 | North America | United States  | Enteritidis             | Enteritidis | 1425  | 49687 |
| SAL_GA8779AA | PNUSAS003470  | SRR4176766     | 2016 | 7 | North America | United States  | Enteritidis             | Enteritidis | 1425  | 49723 |
| SAL_GA8780AA | PNUSAS003469  | SRR4176765     | 2016 | 7 | North America | United States  | Enteritidis             | Enteritidis | 45548 | 49688 |
| SAL_GA8795AA | PNUSAS002685  | SRR4176741     |      |   | North America | United States  | Enteritidis (Predicted) | Enteritidis | 1425  | 49691 |
| SAL_GA8807AA | PNUSAS003678  | SRR4176728     |      |   | North America | United States  | Enteritidis (Predicted) | Enteritidis | 34197 | 49744 |
| SAL_GA8809AA | PNUSAS003676  | SRR4176726     |      |   | North America | United States  | Enteritidis (Predicted) | Enteritidis | 1425  | 49727 |
| SAL_GA8818AA | E2016013470   | SRR4175564     | 2016 | 8 | North America | United States  | Enteritidis             | Enteritidis | 1425  | 49709 |
| SAL_GA8819AA | E2016013100   | SRR4175563     | 2016 | 8 | North America | United States  | Enteritidis             | Enteritidis | 1425  | 49710 |
| SAL_GA8828AA | I2016012753   | SRR4175554     | 2016 | 8 | North America | United States  | Enteritidis             | Enteritidis | 1425  | 49740 |
| SAL_GA8829AA | I2016012750   | SRR4175553     | 2016 | 8 | North America | United States  | Enteritidis             | Enteritidis | 1425  | 49741 |
| SAL_GA8830AA | I2016012340-1 | SRR4175552     | 2016 | 8 | North America | United States  | Enteritidis             | Enteritidis | 1425  | 48785 |
| SAL_GA8831AA | E2016012974   | SRR4175551     | 2016 | 8 | North America | United States  | Enteritidis             | Enteritidis | 1425  | 49713 |
| SAL_GA8832AA | E2016012932   | SRR4175550     | 2016 | 8 | North America | United States  | Enteritidis             | Enteritidis | 1425  | 49735 |
| SAL_GA8833AA | E2016012931   | SRR4175549     | 2016 | 8 | North America | United States  | Enteritidis             | Enteritidis | 1425  | 49731 |
| SAL_GA8834AA | E2016012926   | SRR4175548     | 2016 | 8 | North America | United States  | Enteritidis             | Enteritidis | 1425  | 49728 |
| SAL_GA8835AA | E2016012907   | SRR4175547     | 2016 | 8 | North America | United States  | Enteritidis             | Enteritidis | 1425  | 49709 |
| SAL_GA8836AA | E2016012846   | SRR4175546     | 2016 | 8 | North America | United States  | Enteritidis             | Enteritidis | 1425  | 45549 |
| SAL_GA8837AA | E2016012366   | SRR4175545     | 2016 | 8 | North America | United States  | Enteritidis             | Enteritidis | 34197 | 49674 |
| SAL_GA8838AA | E2016012283   | SRR4175544     | 2016 | 8 | North America | United States  | Enteritidis             | Enteritidis | 1425  | 49714 |
| SAL_GA8879AA | PNUSAS003729  | SRR4190267     | 2016 | 8 | North America | United States  | Enteritidis             | Enteritidis | 1425  | 49782 |
| SAL_GA8882AA | PNUSAS003623  | SRR4190264     | 2016 | 7 | North America | United States  | Enteritidis             | Enteritidis | 1425  | 49254 |
| SAL_GA8884AA | PNUSAS003622  | SRR4190262     | 2016 | 7 | North America | United States  | Enteritidis             | Enteritidis | 1425  | 49804 |
| SAL_GA8885AA | PNUSAS003474  | SRR4190261     | 2016 | 7 | North America | United States  | Enteritidis             | Enteritidis | 1425  | 49813 |
| SAL_GA8928AA | PNUSAS003270  | SRR4190217     |      |   | North America | United States  | Enteritidis (Predicted) | Enteritidis | 1425  | 49771 |
| SAL_GA8949AA | S/20160704    | traces-OoWFntY | 2016 | 7 | 13 Europe     | United Kingdom | Enteritidis             | Enteritidis | 3941  | 49815 |
| SAL_GA8950AA | S/20160745    | traces-OTHVfbs | 2016 | 7 | 22 Europe     | United Kingdom | Enteritidis             | Enteritidis | 3888  | 3621  |
| SAL_GA8951AA | S/20160748    | traces-OwiaSUz | 2016 | 7 | 23 Europe     | United Kingdom | Enteritidis             | Enteritidis | 3888  | 49826 |
| SAL_GA8952AA | S/20160753    | traces-Opvlcq  | 2016 | 7 | 23 Europe     | United Kingdom | Enteritidis             | Enteritidis | 3888  | 49825 |
| SAL_GA8953AA | S/20160782    | traces-OaoNTSr | 2016 | 7 | 27 Europe     | United Kingdom | Enteritidis             | Enteritidis | 3888  | 3621  |
| SAL_GA8954AA | S/20160804    | traces-OnhWWdk | 2016 | 7 | 28 Europe     | United Kingdom | Enteritidis             | Enteritidis | 3888  | 49824 |
| SAL_GA8956AA | S/20160805    | traces-OocSAaw | 2016 | 7 | 28 Europe     | United Kingdom | Enteritidis             | Enteritidis | 3888  | 49823 |
| SAL_GA8957AA | S/20160810    | traces-OzUzShM | 2016 | 7 | 29 Europe     | United Kingdom | Enteritidis             | Enteritidis | 3888  | 49822 |
| SAL_GA8958AA | S/20160812    | traces-OQEjrQX | 2016 | 7 | 29 Europe     | United Kingdom | Enteritidis             | Enteritidis | 3888  | 49822 |
| SAL_GA8959AA | S/20160813    | traces-OvpfFmn | 2016 | 8 | 2 Europe      | United Kingdom | Enteritidis             | Enteritidis | 3888  | 49816 |
| SAL_GA8960AA | S/20160814    | traces-OqkKCGU | 2016 | 7 | 29 Europe     | United Kingdom | Enteritidis             | Enteritidis | 3941  | 49821 |
| SAL_GA8961AA | S/20160820    | traces-OWCJRLU | 2016 | 8 | 1 Europe      | United Kingdom | Enteritidis             | Enteritidis | 3941  | 49820 |
| SAL_GA8962AA | S/20160825    | traces-OCwSXYs | 2016 | 8 | 1 Europe      | United Kingdom | Enteritidis             | Enteritidis | 3888  | 2002  |
| SAL_GA8965AA | S/20160831    | traces-ODtBwA  | 2016 | 8 | 3 Europe      | United Kingdom | Enteritidis             | Enteritidis | 3888  | 49819 |
| SAL_GA8967AA | S/20160836    | traces-OeOKYIA | 2016 | 8 | 4 Europe      | United Kingdom | Enteritidis             | Enteritidis | 3888  | 49818 |
| SAL_GA8969AA | S/20160837    | traces-OTnwQib | 2016 | 8 | 4 Europe      | United Kingdom | Enteritidis             | Enteritidis | 3888  | 3621  |
| SAL_GA8970AA | S/20160840    | traces-OVHJTyQ | 2016 | 8 | 8 Europe      | United Kingdom | Enteritidis             | Enteritidis | 3888  | 49817 |
| SAL_GA8971AA | S/20160852    | traces-Osooyuo | 2016 | 8 | 6 Europe      | United Kingdom | Enteritidis             | Enteritidis | 3888  | 2002  |
| SAL_GA8974AA | S/20160863    | traces-ONGmhyN | 2016 | 8 | 5 Europe      | United Kingdom | Enteritidis             | Enteritidis | 3888  | 49816 |
| SAL_GA8975AA | S/20160865    | traces-OMhlsLL | 2016 | 8 | 11 Europe     | United Kingdom | Enteritidis             | Enteritidis | 3888  | 3621  |
| SAL_GA8976AA | S/20160866    | traces-OuvRSMC | 2016 | 8 | 4 Europe      | United Kingdom | Enteritidis             | Enteritidis | 3888  | 2002  |
| SAL_GA9067AA | E2016013647   | SRR4237886     | 2016 | 8 | North America | United States  | Enteritidis             | Enteritidis | 1425  | 49943 |
| SAL_GA9068AA | E2016013656   | SRR4237885     | 2016 | 8 | North America | United States  | Enteritidis             | Enteritidis | 1425  | 49938 |
| SAL_GA9134AA | C140686       | traces-OYFBzwG | 2014 |   | Europe        | Luxembourg     | Enteritidis             | Enteritidis | 1425  | 49976 |
| SAL_GA9143AA | 14055902      | traces-OQqHshV | 2014 |   | Europe        | Luxembourg     | Enteritidis             | Enteritidis | 1425  | 49970 |

|              |               |                 |      |   |               |                |                         |             |       |       |
|--------------|---------------|-----------------|------|---|---------------|----------------|-------------------------|-------------|-------|-------|
| SAL_GA9144AA | 15043002      | traces-0JMKXOm  | 2015 |   | Europe        | Luxembourg     | Enteritidis             | Enteritidis | 1425  | 49958 |
| SAL_GA9145AA | 14049912      | traces-0mjOduo  | 2014 |   | Europe        | Luxembourg     | Enteritidis             | Enteritidis | 1425  | 49968 |
| SAL_GA9147AA | C131717       | traces-0DKvloM  | 2013 |   | Europe        | Luxembourg     | Enteritidis             | Enteritidis | 1425  | NaN   |
| SAL_GA9158AA | 15042024      | traces-0AsyYtV  | 2015 |   | Europe        | Luxembourg     | Enteritidis             | Enteritidis | 3888  | 49978 |
| SAL_GA9175AA | CFSAN031538   | SRR4243084      | 2005 | 1 | Africa        | Ethiopia       | Enteritidis             | Enteritidis | 1425  | 50002 |
| SAL_GA9176AA | CFSAN031537   | SRR4243083      | 2005 | 1 | Africa        | Ethiopia       | Enteritidis             | Enteritidis | 1425  | 49981 |
| SAL_GA9177AA | CFSAN031536   | SRR4243082      | 2005 | 1 | Africa        | Ethiopia       | Enteritidis             | Enteritidis | 1425  | 50003 |
| SAL_GA9178AA | CFSAN031535   | SRR4243081      | 2005 | 1 | Africa        | Ethiopia       | Enteritidis             | Enteritidis | 1425  | 49986 |
| SAL_GA9200AA | CFSAN031513   | SRR4243051      | 2005 | 1 | Africa        | Ethiopia       | I:9,12:-:-              | Enteritidis | 1425  | 50014 |
| SAL_GA9201AA | CFSAN031512   | SRR4243050      | 2005 | 1 | Africa        | Ethiopia       | I:9,12:-:-              | Enteritidis | 1425  | 49993 |
| SAL_GA9212AA | 14046049      | traces-0nmMNMlr | 2014 |   | Europe        | Luxembourg     | Enteritidis             | Enteritidis | 3888  | 24765 |
| SAL_GA9214AA | 15050407      | traces-0msgoCu  | 2015 |   | Europe        | Luxembourg     | Enteritidis             | Enteritidis | 1425  | 2028  |
| SAL_GA9219AA | 16026942      | traces-0eWclmd  | 2016 |   | Europe        | Luxembourg     | Enteritidis             | Enteritidis | 1425  | 50031 |
| SAL_GA9282AA | PNUSA5003865  | SRR4244393      | 2016 | 7 | North America | United States  | Enteritidis             | Enteritidis | 1425  | 50076 |
| SAL_GA9302AA | FSIS1607531   | SRR4252419      | 2016 |   | North America | United States  | Enteritidis             | Enteritidis | 1425  | 50101 |
| SAL_GA9335AA | S/20160924    | traces-0dVbqVJ  | 2016 | 8 | 19 Europe     | United Kingdom | Enteritidis             | Enteritidis | 3888  | 50134 |
| SAL_GA9336AA | S/20160926    | traces-0OktovZ  | 2016 | 8 | 21 Europe     | United Kingdom | Enteritidis             | Enteritidis | 3888  | 50136 |
| SAL_GA9337AA | S/20160951    | traces-0bToyWF  | 2016 | 8 | 26 Europe     | United Kingdom | Enteritidis             | Enteritidis | 3888  | 50135 |
| SAL_GA9347AA | E2016013694   | SRR4256755      | 2016 | 8 | North America | United States  | Enteritidis             | Enteritidis | 1425  | 49943 |
| SAL_GA9348AA | E2016013872-1 | SRR4256617      | 2016 | 9 | North America | United States  | Enteritidis             | Enteritidis | 1425  | 50171 |
| SAL_GA9349AA | E2016013873   | SRR4256616      | 2016 | 9 | North America | United States  | Enteritidis             | Enteritidis | 1425  | 50154 |
| SAL_GA9351AA | I2016013863   | SRR4256615      | 2016 | 8 | North America | United States  | Enteritidis             | Enteritidis | 1425  | 50170 |
| SAL_GA9352AA | I2016013970-1 | SRR4256614      | 2016 | 9 | North America | United States  | Enteritidis             | Enteritidis | 1425  | 50161 |
| SAL_GA9357AA | ADRD_L_R162   | SRR4256096      | 2016 | 3 | North America | United States  | Enteritidis (Predicted) | Enteritidis | 1425  | 50172 |
| SAL_GA9375AA | CFSAN055194   | SRR4292689      | 2016 | 8 | North America | United States  | Enteritidis             | Enteritidis | 1425  | 50155 |
| SAL_GA9382AA | CDPH_C73      | SRR5481462      |      |   |               |                | Enteritidis             | Enteritidis | 1425  | 12116 |
| SAL_GA9393AA | PNUSA5003016  | SRR4273717      | 2016 | 3 | North America | United States  | Enteritidis             | Enteritidis | 1425  | 50202 |
| SAL_GA9395AA | PNUSA5003627  | SRR4273715      |      |   | North America | United States  | Enteritidis (Predicted) | Enteritidis | 1425  | 50204 |
| SAL_GA9397AA | PNUSA5003625  | SRR4273713      |      |   | North America | United States  | Enteritidis (Predicted) | Enteritidis | 1425  | 50224 |
| SAL_GA9398AA | PNUSA5003624  | SRR4273712      |      |   | North America | United States  | Enteritidis (Predicted) | Enteritidis | 1425  | 50217 |
| SAL_GA9402AA | PNUSA5003698  | SRR4273708      | 2016 | 7 | North America | United States  | Enteritidis             | Enteritidis | 1425  | 50207 |
| SAL_GA9406AA | PNUSA5003694  | SRR4273704      | 2016 | 7 | North America | United States  | Enteritidis             | Enteritidis | 1425  | 50208 |
| SAL_GA9419AA | PNUSA5003860  | SRR4273691      |      |   | North America | United States  | Enteritidis (Predicted) | Enteritidis | 1425  | 49135 |
| SAL_GA9421AA | PNUSA5003858  | SRR4273689      | 2016 | 8 | North America | United States  | Enteritidis             | Enteritidis | 1425  | 50180 |
| SAL_GA9422AA | PNUSA5003857  | SRR4273688      | 2016 | 8 | North America | United States  | Enteritidis             | Enteritidis | 27863 | 50181 |
| SAL_GA9423AA | PNUSA5003856  | SRR4273687      | 2016 | 8 | North America | United States  | Enteritidis             | Enteritidis | 1425  | 50182 |
| SAL_GA9430AA | PNUSA5003874  | SRR5195279      | 2016 | 7 | North America | United States  | Enteritidis             | Enteritidis | 1425  | 50189 |
| SAL_GA9497AA | CVM N62944    | SRR4280620      | 2015 |   | North America | United States  | Enteritidis             | Enteritidis | 1425  | 50286 |
| SAL_GA9515AA | CVM N62435    | SRR4280602      | 2015 |   | North America | United States  | Enteritidis             | Enteritidis | 1425  | 50274 |
| SAL_GA9516AA | CVM N62434    | SRR4280601      | 2015 |   | North America | United States  | Enteritidis             | Enteritidis | 1425  | 50247 |
| SAL_GA9524AA | CVM N59313    | SRR4280593      | 2015 |   | North America | United States  | Enteritidis             | Enteritidis | 1425  | 50283 |
| SAL_GA9527AA | CVM N59310    | SRR4280590      | 2015 |   | North America | United States  | Enteritidis             | Enteritidis | 1425  | 17527 |
| SAL_GA9542AA | CVM N58678    | SRR4280575      | 2015 |   | North America | United States  | Enteritidis             | Enteritidis | 1425  | 50305 |
| SAL_GA9561AA | FDA00003904   | SRR4279932      | 2011 | 7 | North America | United States  | Enteritidis             | Enteritidis | 1425  | 50261 |
| SAL_GA9588AA | FSIS1607716   | SRR4288985      | 2016 |   | North America | United States  | Enteritidis             | Enteritidis | 1425  | 50294 |
| SAL_GA9606AA | 1091601542    | traces-0LrwNgX  |      |   | Europe        | Netherlands    | Enteritidis             | Enteritidis | 3888  | 2002  |
| SAL_GA9607AA | 1091601510    | traces-0rQUdiu  |      |   | Europe        | Netherlands    | Enteritidis             | Enteritidis | 3888  | 2002  |
| SAL_GA9608AA | 1091601413    | traces-0jyrklis |      |   | Europe        | Netherlands    | Enteritidis             | Enteritidis | 3888  | 50297 |
| SAL_GA9609AA | 1091601343    | traces-0qmckMD  |      |   | Europe        | Netherlands    | Enteritidis             | Enteritidis | 3888  | 50289 |
| SAL_GA9610AA | 1091601248    | traces-0rKtleb  |      |   | Europe        | Netherlands    | Enteritidis             | Enteritidis | 3888  | 2002  |
| SAL_GA9611AA | 1091601162    | traces-0RRDNHHA |      |   | Europe        | Netherlands    | Enteritidis             | Enteritidis | 3888  | 50290 |
| SAL_GA9612AA | 1091601118    | traces-0jBqEif  |      |   | Europe        | Netherlands    | Enteritidis             | Enteritidis | 3888  | 50307 |
| SAL_GA9613AA | 1091601072    | traces-0rjpBCU  |      |   | Europe        | Netherlands    | Enteritidis             | Enteritidis | 3888  | 2002  |
| SAL_GA9614AA | 1091601003    | traces-0oPoffY  |      |   | Europe        | Netherlands    | Enteritidis             | Enteritidis | 3888  | 2002  |
| SAL_GA9615AA | 1091600887    | traces-0GIPtkh  |      |   | Europe        | Netherlands    | Enteritidis             | Enteritidis | 3888  | 2002  |
| SAL_GA9616AA | 16EP000978    | traces-0luJGpK  |      |   | Europe        | Norway         | Enteritidis             | Enteritidis | 3941  | 50288 |
| SAL_GA9617AA | 16EP000866    | traces-0pItqTp  |      |   | Europe        | Norway         | Enteritidis             | Enteritidis | 3888  | 50309 |
| SAL_GA9645AA | CFSAN001001   | SRR4293084      |      |   |               |                | Enteritidis             | Enteritidis | 27433 | 50417 |
| SAL_GA9649AA | CFSAN000997   | SRR4293058      |      |   |               |                | Enteritidis             | Enteritidis | 1425  | 50424 |

|              |               |                 |      |   |               |               |                         |             |       |       |
|--------------|---------------|-----------------|------|---|---------------|---------------|-------------------------|-------------|-------|-------|
| SAL_GA9733AA | E2016014437   | SRR4292712      | 2016 | 9 | North America | United States | Enteritidis             | Enteritidis | 1425  | 50366 |
| SAL_GA9752AA | IA-2011060617 | SRR4292682      | 2011 |   | North America | United States | Enteritidis (Predicted) | Enteritidis | 1425  | 50390 |
| SAL_GA9757AA | IA-2011088535 | SRR4292677      | 2011 |   | North America | United States | Enteritidis (Predicted) | Enteritidis | 1425  | 50355 |
| SAL_GA9764AA | NYVetLIRN-14  | SRR4292618      | 2016 | 6 | North America | United States | Enteritidis             | Enteritidis | 27924 | 50369 |
| SAL_GA9798AA | PNUSAS003759  | SRR4292015      | 2016 | 8 | North America | United States | Enteritidis             | Enteritidis | 1425  | 50341 |
| SAL_GA9799AA | PNUSAS003758  | SRR4292014      | 2016 | 8 | North America | United States | Enteritidis             | Enteritidis | 3888  | 2002  |
| SAL_GA9800AA | PNUSAS003757  | SRR4292013      | 2016 | 8 | North America | United States | Enteritidis             | Enteritidis | 1425  | 50360 |
| SAL_GA9802AA | PNUSAS003755  | SRR4292011      | 2016 | 8 | North America | United States | Enteritidis             | Enteritidis | 1425  | 50329 |
| SAL_GA9803AA | PNUSAS003754  | SRR4292010      | 2016 | 8 | North America | United States | Enteritidis             | Enteritidis | 1425  | 50324 |
| SAL_GA9805AA | PNUSAS003752  | SRR4292008      | 2016 | 7 | North America | United States | Enteritidis             | Enteritidis | 1425  | 50336 |
| SAL_GA9812AA | PNUSAS003968  | SRR4292001      | 2016 | 8 | North America | United States | Enteritidis (Predicted) | Enteritidis | 1425  | 49135 |
| SAL_GA9813AA | PNUSAS003967  | SRR4292000      | 2016 | 8 | North America | United States | Enteritidis (Predicted) | Enteritidis | 1425  | 49135 |
| SAL_GA9814AA | PNUSAS003861  | SRR4291999      | 2016 | 8 | North America | United States | Enteritidis (Predicted) | Enteritidis | 1425  | 49135 |
| SAL_GA9854AA | 16042880      | traces-OAhDKEV  | 2016 |   | Europe        | Luxembourg    | Enteritidis             | Enteritidis | 3888  | 81310 |
| SAL_GA9855AA | PNUSAS003799  | SRR4295155      | 2016 | 1 | North America | United States | Enteritidis             | Enteritidis | 1425  | 50569 |
| SAL_GA9940AA | PNUSAS003782  | SRR4295068      | 2016 | 6 | North America | United States | Typhimurium             | Enteritidis | 1425  | 50566 |
| SAL_GA9950AA | PNUSAS003876  | SRR4295058      |      |   | North America | United States | Enteritidis (Predicted) | Enteritidis | 1425  | 49709 |
| SAL_GA9951AA | PNUSAS003875  | SRR4295057      |      |   | North America | United States | Enteritidis (Predicted) | Enteritidis | 1425  | 49709 |
| SAL_GA9958AA | PNUSAS004206  | SRR4295050      | 2016 | 8 | North America | United States | Enteritidis             | Enteritidis | 1425  | 50610 |
| SAL_GA9959AA | PNUSAS003924  | SRR4295049      | 2016 | 8 | North America | United States | Enteritidis             | Enteritidis | 1425  | 50504 |
| SAL_GA9962AA | PNUSAS004073  | SRR4295046      | 2016 | 8 | North America | United States | Enteritidis             | Enteritidis | 1425  | 50525 |
| SAL_GA9963AA | PNUSAS003979  | SRR4295045      | 2016 | 8 | North America | United States | Enteritidis (Predicted) | Enteritidis | 1425  | 49135 |
| SAL_GA9964AA | PNUSAS004086  | SRR4295044      | 2016 | 8 | North America | United States | Enteritidis             | Enteritidis | 1425  | 50526 |
| SAL_GA9968AA | PNUSAS004069  | SRR4295040      | 2016 | 8 | North America | United States | Enteritidis             | Enteritidis | 1425  | 50620 |
| SAL_GA9969AA | PNUSAS004068  | SRR4295039      | 2016 | 8 | North America | United States | Enteritidis             | Enteritidis | 1425  | 50506 |
| SAL_GA9976AA | PNUSAS003976  | SRR4295032      | 2016 | 8 | North America | United States | Enteritidis             | Enteritidis | 1425  | 50507 |
| SAL_GA9983AA | PNUSAS003847  | SRR4295025      |      |   | North America | United States | Enteritidis (Predicted) | Enteritidis | 1425  | 44222 |
| SAL_HA0034AA | 16042880-SAL  | traces-OPagAiU  |      |   | Europe        | Luxembourg    | Enteritidis             | Enteritidis | 3888  | 50501 |
| SAL_HA0035AA | S/20160783    | traces-OYghCIG  | 2016 | 7 |               |               | Enteritidis             | Enteritidis | 3888  | 3621  |
| SAL_HA0036AA | S/20160795    | traces-OLGKrIS  | 2016 | 7 |               |               | Enteritidis             | Enteritidis | 3888  | 3621  |
| SAL_HA0037AA | S/20160873    | traces-OukqJOA  | 2016 | 8 |               | 10            | Enteritidis             | Enteritidis | 3888  | 50543 |
| SAL_HA0038AA | S/20160876    | traces-OHOObPbc | 2016 | 8 |               | 11            | Enteritidis             | Enteritidis | 1425  | 50518 |
| SAL_HA0039AA | S/20160879    | traces-OxrPfhJ  | 2016 | 8 |               | 11            | Enteritidis             | Enteritidis | 3888  | 50542 |
| SAL_HA0040AA | S/20160904    | traces-OHeqRtp  | 2016 | 8 |               | 13            | Enteritidis             | Enteritidis | 3888  | 2002  |
| SAL_HA0041AA | S/20160912    | traces-OwLNVX   | 2016 | 8 |               | 19            | Enteritidis             | Enteritidis | 3888  | 50541 |
| SAL_HA0042AA | S/20160968    | traces-OlxqceW  | 2016 | 8 |               | 25            | Enteritidis             | Enteritidis | 3888  | 50540 |
| SAL_HA0043AA | S/20161024    | traces-OxKSsTa  | 2016 | 9 |               | 2             | Enteritidis             | Enteritidis | 3888  | 49818 |
| SAL_HA0044AA | S/20161028    | traces-OfdDEZX  | 2016 | 9 |               | 3             | Enteritidis             | Enteritidis | 1425  | 50539 |
| SAL_HA0045AA | S/20161055    | traces-OAsfeHr  | 2016 | 9 |               | 7             | Enteritidis             | Enteritidis | 3888  | 50538 |
| SAL_HA0046AA | S/20160905    | traces-OSRQfAf  | 2016 | 8 |               | 13            | Enteritidis             | Enteritidis | 3888  | 2002  |
| SAL_HA0062AA | PNUSAS004201  | SRR4297073      |      |   | North America | United States | Enteritidis (Predicted) | Enteritidis | 1425  | 50669 |
| SAL_HA0063AA | PNUSAS004200  | SRR4297072      | 2016 | 4 | North America | United States | Enteritidis             | Enteritidis | 34197 | 45550 |
| SAL_HA0087AA | PNUSAS003774  | SRR4297048      | 2016 | 8 | North America | United States | Enteritidis             | Enteritidis | 1425  | 50662 |
| SAL_HA0091AA | PNUSAS003770  | SRR4297044      | 2016 | 8 | North America | United States | Enteritidis             | Enteritidis | 1425  | 17527 |
| SAL_HA0092AA | PNUSAS003923  | SRR4297043      | 2016 | 7 | North America | United States | Serotype Pending        | Enteritidis | 1425  | 47838 |
| SAL_HA0116AA | IA-2009121617 | SRR4301117      | 2009 | 8 | North America | United States | Enteritidis             | Enteritidis | 1425  | 50678 |
| SAL_HA0121AA | IA-2009099254 | SRR4301112      | 2009 | 8 | North America | United States | Enteritidis (Predicted) | Enteritidis | 1425  | 50684 |
| SAL_HA0169AA | I2016014963-1 | SRR4340444      | 2016 | 9 | North America | United States | Enteritidis             | Enteritidis | 1425  | 50731 |
| SAL_HA0171AA | 1091600823    | traces-OKlplSF  |      |   | Europe        | Netherlands   | Enteritidis             | Enteritidis | 3888  | 2002  |
| SAL_HA0172AA | 1091600857    | traces-OmSUaNU  |      |   | Europe        | Netherlands   | Enteritidis             | Enteritidis | 3888  | 2002  |
| SAL_HA0174AA | 1091600881    | traces-OEerzbo  |      |   | Europe        | Netherlands   | Enteritidis             | Enteritidis | 3888  | 49337 |
| SAL_HA0175AA | 1091600936    | traces-OiZIUUR  |      |   | Europe        | Netherlands   | Enteritidis             | Enteritidis | 3888  | 2002  |
| SAL_HA0176AA | 1091600937    | traces-Oxyzobu  |      |   | Europe        | Netherlands   | Enteritidis             | Enteritidis | 3888  | 2002  |
| SAL_HA0177AA | 1091600938    | traces-OaElVyk  |      |   | Europe        | Netherlands   | Enteritidis             | Enteritidis | 3888  | 49337 |
| SAL_HA0178AA | 1091600969    | traces-OhreilX  |      |   | Europe        | Netherlands   | Enteritidis             | Enteritidis | 3888  | 50714 |
| SAL_HA0179AA | 1091601041    | traces-OwASplU  |      |   | Europe        | Netherlands   | Enteritidis             | Enteritidis | 3888  | 50713 |
| SAL_HA0180AA | 1091601047    | traces-OAyKmCj  |      |   | Europe        | Netherlands   | Enteritidis             | Enteritidis | 3888  | 50712 |
| SAL_HA0181AA | 1091601061    | traces-OzOeecB  |      |   | Europe        | Netherlands   | Enteritidis             | Enteritidis | 3888  | 2002  |
| SAL_HA0182AA | 1091601070    | traces-OGzAfvM  |      |   | Europe        | Netherlands   | Enteritidis             | Enteritidis | 3888  | 2002  |

|              |                    |                |      |   |               |               |                         |             |       |       |
|--------------|--------------------|----------------|------|---|---------------|---------------|-------------------------|-------------|-------|-------|
| SAL_HAO183AA | 1091601074         | traces-0Elgqhy |      |   | Europe        | Netherlands   | Enteritidis             | Enteritidis | 3888  | 2002  |
| SAL_HAO184AA | 1091601093         | traces-0FGcFPJ |      |   | Europe        | Netherlands   | Enteritidis             | Enteritidis | 3888  | 50711 |
| SAL_HAO185AA | 1091601102         | traces-0dDyXdO |      |   | Europe        | Netherlands   | Enteritidis             | Enteritidis | 3888  | 50725 |
| SAL_HAO186AA | 1091601107         | traces-0UyEQQj |      |   | Europe        | Netherlands   | Enteritidis             | Enteritidis | 3888  | 50724 |
| SAL_HAO187AA | 1091601124         | traces-0aYTQXL |      |   | Europe        | Netherlands   | Enteritidis             | Enteritidis | 3888  | 50711 |
| SAL_HAO188AA | 1091601127         | traces-0YFqGwj |      |   | Europe        | Netherlands   | Enteritidis             | Enteritidis | 3888  | 2002  |
| SAL_HAO189AA | 1091601157         | traces-0fZhOfg |      |   | Europe        | Netherlands   | Enteritidis             | Enteritidis | 3888  | 50710 |
| SAL_HAO190AA | 1091601159         | traces-0oItqbN |      |   | Europe        | Netherlands   | Enteritidis             | Enteritidis | 3888  | 2002  |
| SAL_HAO191AA | 1091601198         | traces-0tZLgke |      |   | Europe        | Netherlands   | Enteritidis             | Enteritidis | 3888  | 2002  |
| SAL_HAO192AA | 1091601201         | traces-0PVKIRd |      |   | Europe        | Netherlands   | Enteritidis             | Enteritidis | 3888  | 2002  |
| SAL_HAO193AA | 1091601228         | traces-0SdBjch |      |   | Europe        | Netherlands   | Enteritidis             | Enteritidis | 3888  | 2002  |
| SAL_HAO194AA | 1091601240         | traces-0FgiALC |      |   | Europe        | Netherlands   | Enteritidis             | Enteritidis | 26384 | 50708 |
| SAL_HAO195AA | 1091601241         | traces-0nCTWde |      |   | Europe        | Netherlands   | Enteritidis             | Enteritidis | 3888  | 50723 |
| SAL_HAO196AA | 1091601246         | traces-0pYcocC |      |   | Europe        | Netherlands   | Enteritidis             | Enteritidis | 3888  | 2002  |
| SAL_HAO197AA | 1091601247         | traces-0UdDGNM |      |   | Europe        | Netherlands   | Enteritidis             | Enteritidis | 3888  | 50709 |
| SAL_HAO198AA | 1091601270         | traces-0tCecnM |      |   | Europe        | Netherlands   | Enteritidis             | Enteritidis | 3888  | 2002  |
| SAL_HAO199AA | 1091601298         | traces-0NZBwvm |      |   | Europe        | Netherlands   | Enteritidis             | Enteritidis | 3888  | 50722 |
| SAL_HAO200AA | 1091601305         | traces-0xyhOfg |      |   | Europe        | Netherlands   | Enteritidis             | Enteritidis | 3888  | 50721 |
| SAL_HAO201AA | 1091601341         | traces-0gyUMnx |      |   | Europe        | Netherlands   | Enteritidis             | Enteritidis | 3888  | 50720 |
| SAL_HAO202AA | 1091601351         | traces-0aKbGmi |      |   | Europe        | Netherlands   | Enteritidis             | Enteritidis | 3888  | 50720 |
| SAL_HAO203AA | 1091601352         | traces-0cgqzrc |      |   | Europe        | Netherlands   | Enteritidis             | Enteritidis | 3888  | 2002  |
| SAL_HAO204AA | 1091601383         | traces-0ctjiWp |      |   | Europe        | Netherlands   | Enteritidis             | Enteritidis | 26384 | 50708 |
| SAL_HAO205AA | 1091601384         | traces-0LLSAFV |      |   | Europe        | Netherlands   | Enteritidis             | Enteritidis | 3888  | 2002  |
| SAL_HAO206AA | 1091601395         | traces-0KBgizH |      |   | Europe        | Netherlands   | Enteritidis             | Enteritidis | 3888  | 2002  |
| SAL_HAO207AA | 16EP001503         | traces-0IFZwUQ |      |   | Europe        | Norway        | Enteritidis             | Enteritidis | 3888  | 50719 |
| SAL_HAO208AA | 2015-01-4688-B3075 | traces-0dBjWtj |      |   | Europe        | Norway        | Enteritidis             | Enteritidis | 3888  | 50718 |
| SAL_HAO209AA | 1091601416         | traces-0nWYLBu |      |   | Europe        | Netherlands   | Enteritidis             | Enteritidis | 3888  | 2002  |
| SAL_HAO210AA | 1091601436         | traces-0VJyrzH |      |   | Europe        | Netherlands   | Enteritidis             | Enteritidis | 3888  | 50729 |
| SAL_HAO211AA | 1091601443         | traces-0EeLaxz |      |   | Europe        | Netherlands   | Enteritidis             | Enteritidis | 3888  | 50717 |
| SAL_HAO212AA | 1091601460         | traces-0aBVvFh |      |   | Europe        | Netherlands   | Enteritidis             | Enteritidis | 3888  | 50707 |
| SAL_HAO213AA | 1091601461         | traces-0RZrzhO |      |   | Europe        | Netherlands   | Enteritidis             | Enteritidis | 3888  | 50707 |
| SAL_HAO214AA | 1091601466         | traces-0szZjbH |      |   | Europe        | Netherlands   | Enteritidis             | Enteritidis | 3888  | 50716 |
| SAL_HAO215AA | 1091601491         | traces-0ynQecZ |      |   | Europe        | Netherlands   | Enteritidis             | Enteritidis | 3888  | 2002  |
| SAL_HAO216AA | 1091601505         | traces-0pEnjNd |      |   | Europe        | Netherlands   | Enteritidis             | Enteritidis | 3888  | 50715 |
| SAL_HAO217AA | 1091601538         | traces-0Kqifgv |      |   | Europe        | Netherlands   | Enteritidis             | Enteritidis | 3888  | 2002  |
| SAL_HAO218AA | 1091601549         | traces-0VEViXj |      |   | Europe        | Netherlands   | Enteritidis             | Enteritidis | 3888  | 2002  |
| SAL_HAO219AA | 1091601553         | traces-0NrAXVB |      |   | Europe        | Netherlands   | Enteritidis             | Enteritidis | 3888  | 2002  |
| SAL_HAO220AA | 1091601557         | traces-0FcjiuE |      |   | Europe        | Netherlands   | Enteritidis             | Enteritidis | 3888  | 50728 |
| SAL_HAO221AA | 1091601558         | traces-0JvFtsR |      |   | Europe        | Netherlands   | Enteritidis             | Enteritidis | 3888  | 50727 |
| SAL_HAO222AA | 1091601559         | traces-0SJXMmd |      |   | Europe        | Netherlands   | Enteritidis             | Enteritidis | 3888  | 2002  |
| SAL_HAO223AA | 1091601484         | traces-0qSJTVO |      |   | Europe        | Netherlands   | Enteritidis             | Enteritidis | 3888  | 50726 |
| SAL_HAO224AA | 110368             | traces-0hAirel |      |   | Europe        | Finland       | Enteritidis             | Enteritidis | 3888  | 50730 |
| SAL_HAO255AA | PNUSA5004346       | SRR4342982     | 2016 | 9 | North America | United States | Enteritidis             | Enteritidis | 27446 | 50782 |
| SAL_HAO256AA | PNUSA5004288       | SRR4342981     |      |   | North America | United States | Enteritidis (Predicted) | Enteritidis | 1425  | 50794 |
| SAL_HAO257AA | PNUSA5004129       | SRR4342980     | 2016 | 8 | North America | United States | Enteritidis             | Enteritidis | 1425  | 50778 |
| SAL_HAO258AA | PNUSA5004128       | SRR4342979     | 2016 | 9 | North America | United States | Enteritidis             | Enteritidis | 27863 | 50763 |
| SAL_HAO259AA | PNUSA5004127       | SRR4342978     | 2016 | 8 | North America | United States | Enteritidis             | Enteritidis | 27863 | 50795 |
| SAL_HAO260AA | PNUSA5004126       | SRR4342977     | 2016 | 8 | North America | United States | Enteritidis             | Enteritidis | 1425  | 50832 |
| SAL_HAO266AA | PNUSA5004082       | SRR4342971     | 2016 | 8 | North America | United States | Enteritidis             | Enteritidis | 1425  | 50765 |
| SAL_HAO272AA | PNUSA5003894       | SRR4342965     | 2016 | 8 | North America | United States | Enteritidis             | Enteritidis | 1425  | 50789 |
| SAL_HAO275AA | PNUSA5003893       | SRR4342962     | 2016 | 7 | North America | United States | Enteritidis             | Enteritidis | 1425  | 50808 |
| SAL_HAO282AA | PNUSA5004185       | SRR4342955     | 2016 | 9 | North America | United States | Enteritidis             | Enteritidis | 1425  | 50801 |
| SAL_HAO283AA | PNUSA5004184       | SRR4342954     | 2016 | 9 | North America | United States | Enteritidis             | Enteritidis | 1425  | 50770 |
| SAL_HAO285AA | PNUSA5004183       | SRR4342952     |      |   | North America | United States | Enteritidis (Predicted) | Enteritidis | 1425  | 50764 |
| SAL_HAO287AA | PNUSA5004186       | SRR4342950     | 2016 | 8 | North America | United States | Enteritidis             | Enteritidis | 1425  | 50802 |
| SAL_HAO288AA | PNUSA5004182       | SRR4342949     | 2016 | 8 | North America | United States | Enteritidis             | Enteritidis | 1425  | 50797 |
| SAL_HAO289AA | PNUSA5004181       | SRR4342948     | 2016 | 8 | North America | United States | Enteritidis             | Enteritidis | 1425  | 50771 |
| SAL_HAO291AA | PNUSA5004180       | SRR4342946     | 2016 | 8 | North America | United States | Enteritidis             | Enteritidis | 1425  | 50772 |
| SAL_HAO293AA | PNUSA5004179       | SRR4342944     | 2016 | 8 | North America | United States | Enteritidis             | Enteritidis | 27944 | 46038 |

|              |                     |                |      |   |               |                |                         |             |      |       |
|--------------|---------------------|----------------|------|---|---------------|----------------|-------------------------|-------------|------|-------|
| SAL_HA0294AA | PNUSAS004178        | SRR4342943     | 2016 | 8 | North America | United States  | Enteritidis             | Enteritidis | 1425 | 50773 |
| SAL_HA0295AA | PNUSAS004177        | SRR4342942     | 2016 | 8 | North America | United States  | Enteritidis             | Enteritidis | 1425 | 48715 |
| SAL_HA0302AA | PNUSAS003721        | SRR4342935     | 2016 | 8 | North America | United States  | Bareilly                | Enteritidis | 1425 | 50789 |
| SAL_HA0306AA | PNUSAS003717        | SRR4342931     | 2016 | 8 | North America | United States  | Enteritidis             | Enteritidis | 1425 | 50822 |
| SAL_HA0307AA | PNUSAS003716        | SRR4342930     | 2016 | 8 | North America | United States  | Typhimurium             | Enteritidis | 1425 | 50747 |
| SAL_HA0308AA | PNUSAS003715        | SRR4342929     |      |   | North America | United States  | Enteritidis (Predicted) | Enteritidis | 1425 | 50747 |
| SAL_HA0319AA | PNUSAS003457        | SRR4342918     |      |   | North America | United States  | Enteritidis (Predicted) | Enteritidis | 1425 | 50750 |
| SAL_HA0321AA | PNUSAS003455        | SRR4342916     | 2016 | 7 | North America | United States  | Enteritidis             | Enteritidis | 1425 | 50752 |
| SAL_HA0327AA | PNUSAS004334        | SRR4342910     | 2016 | 8 | North America | United States  | Enteritidis             | Enteritidis | 1425 | 50757 |
| SAL_HA0328AA | PNUSAS004333        | SRR4342909     | 2016 | 8 | North America | United States  | Enteritidis             | Enteritidis | 1425 | 50813 |
| SAL_HA0335AA | PNUSAS004325        | SRR4342902     | 2016 | 8 | North America | United States  | Enteritidis             | Enteritidis | 1425 | 50738 |
| SAL_HA0401AA | 2016K-0846          | SRR4298894     |      |   | North America | United States  | Enteritidis (Predicted) | Enteritidis | 1425 | 50789 |
| SAL_HA0402AA | 2016K-0834          | SRR4298893     |      |   | North America | United States  | Enteritidis (Predicted) | Enteritidis | 1425 | 49727 |
| SAL_HA0403AA | 2016K-0840          | SRR4298892     |      |   | North America | United States  | Enteritidis (Predicted) | Enteritidis | 1425 | 50789 |
| SAL_HA0404AA | 2016K-0839          | SRR4298891     |      |   | North America | United States  | Enteritidis (Predicted) | Enteritidis | 1425 | 50860 |
| SAL_HA0405AA | 2016K-0835          | SRR4298890     |      |   | North America | United States  | Enteritidis (Predicted) | Enteritidis | 1425 | 50865 |
| SAL_HA0407AA | 2016K-0857          | SRR4298888     |      |   | North America | United States  | Enteritidis (Predicted) | Enteritidis | 1425 | 50851 |
| SAL_HA0410AA | 2016K-0856          | SRR4298885     |      |   | North America | United States  | Enteritidis (Predicted) | Enteritidis | 1425 | 50862 |
| SAL_HA0416AA | CFSAN025424         | SRR4319131     | 2006 |   | Europe        | United Kingdom | Enteritidis             | Enteritidis | 1425 | 50856 |
| SAL_HA0430AA | PNUSAS003800        | SRR4415956     |      |   | North America | United States  | Enteritidis (Predicted) | Enteritidis | 1425 | 45084 |
| SAL_HA0433AA | PNUSAS004039        | SRR4415952     | 2016 | 8 | North America | United States  | Enteritidis             | Enteritidis | 1425 | 50897 |
| SAL_HA0451AA | PNUSAS004015        | SRR4415734     |      |   | North America | United States  | Enteritidis (Predicted) | Enteritidis | 1425 | 49709 |
| SAL_HA0452AA | PNUSAS004014        | SRR4415733     |      |   | North America | United States  | Enteritidis             | Enteritidis | 1425 | 50906 |
| SAL_HA0453AA | PNUSAS004013        | SRR4414192     |      |   | North America | United States  | Enteritidis             | Enteritidis | 1425 | 50907 |
| SAL_HA0472AA | PNUSAS004305        | SRR4414128     |      |   | North America | United States  | Enteritidis (Predicted) | Enteritidis | 1425 | 50893 |
| SAL_HA0473AA | PNUSAS004304        | SRR4414127     |      |   | North America | United States  | Enteritidis (Predicted) | Enteritidis | 1425 | 50224 |
| SAL_HA0474AA | PNUSAS004303        | SRR4414126     | 2016 | 8 | North America | United States  | Enteritidis             | Enteritidis | 1425 | 50893 |
| SAL_HA0475AA | PNUSAS004302        | SRR4414125     |      |   | North America | United States  | Enteritidis (Predicted) | Enteritidis | 1425 | 50893 |
| SAL_HA0487AA | PNUSAS004231        | SRR4414113     | 2016 | 8 | North America | United States  | Enteritidis             | Enteritidis | 1425 | 51277 |
| SAL_HA0511AA | PNUSAS004385        | SRR4414089     | 2016 | 8 | North America | United States  | Enteritidis             | Enteritidis | 1425 | 50747 |
| SAL_HA0520AA | PNUSAS004376        | SRR4414080     |      |   | North America | United States  | Enteritidis (Predicted) | Enteritidis | 1425 | 51260 |
| SAL_HA0521AA | PNUSAS004375        | SRR4414079     | 2016 | 8 | North America | United States  | Enteritidis             | Enteritidis | 1425 | 51224 |
| SAL_HA0522AA | PNUSAS004374        | SRR4414078     |      |   | North America | United States  | Enteritidis (Predicted) | Enteritidis | 1425 | 51272 |
| SAL_HA0527AA | PNUSAS004368        | SRR4414073     | 2016 | 8 | North America | United States  | Enteritidis             | Enteritidis | 1425 | 51263 |
| SAL_HA0528AA | PNUSAS004367        | SRR4414072     | 2016 | 8 | North America | United States  | Enteritidis             | Enteritidis | 1425 | 51273 |
| SAL_HA0531AA | S16BD04187          | traces-OLqRGYH |      |   | Europe        | Belgium        | Enteritidis             | Enteritidis | 3888 | 50912 |
| SAL_HA0532AA | S16BD04298          | traces-OvjDelh |      |   | Europe        | Belgium        | Enteritidis             | Enteritidis | 3888 | 2002  |
| SAL_HA0535AA | S16BD04564          | traces-OIKCFgJ |      |   | Europe        | Belgium        | Enteritidis             | Enteritidis | 3941 | 50914 |
| SAL_HA0536AA | S16BD04629          | traces-ObmCBkz |      |   | Europe        | Belgium        | Enteritidis             | Enteritidis | 3941 | 50915 |
| SAL_HA0537AA | S16BD05065          | traces-OVCYamL |      |   | Europe        | Belgium        | Enteritidis             | Enteritidis | 3888 | 2002  |
| SAL_HA0538AA | S16BD05414          | traces-OzpgLn  |      |   | Europe        | Belgium        | Enteritidis             | Enteritidis | 3888 | 2002  |
| SAL_HA0539AA | S16BD05419          | traces-OYgxwPp |      |   | Europe        | Belgium        | Enteritidis             | Enteritidis | 3888 | 2002  |
| SAL_HA0540AA | S16BD05528          | traces-OnoeRUu |      |   | Europe        | Belgium        | Enteritidis             | Enteritidis | 3888 | 2002  |
| SAL_HA0541AA | S16BD05443          | traces-OdvQhTX |      |   | Europe        | Belgium        | Enteritidis             | Enteritidis | 3941 | 50916 |
| SAL_HA0542AA | S343                | traces-OKFPqMO |      |   | Europe        | Sweden         | Enteritidis             | Enteritidis | 3941 | 49815 |
| SAL_HA0543AA | S365                | traces-OYjblIH |      |   | Europe        | Sweden         | Enteritidis             | Enteritidis | 3888 | 49337 |
| SAL_HA0544AA | S398                | traces-OnriHyD |      |   | Europe        | Sweden         | Enteritidis             | Enteritidis | 3888 | 50917 |
| SAL_HA0545AA | S424                | traces-OxJVRCg |      |   | Europe        | Sweden         | Enteritidis             | Enteritidis | 3888 | 50917 |
| SAL_HA0546AA | S431                | traces-OYtrCcE |      |   | Europe        | Sweden         | Enteritidis             | Enteritidis | 3888 | 2002  |
| SAL_HA0547AA | S453                | traces-OoiGvcb |      |   | Europe        | Sweden         | Enteritidis             | Enteritidis | 3941 | 50918 |
| SAL_HA0548AA | 2015-01-1680        | traces-OmnFNxB |      |   | Europe        | Norway         | Enteritidis             | Enteritidis | 3888 | 50919 |
| SAL_HA0549AA | 16EP001346          | traces-OjOCaLg |      |   | Europe        | Norway         | Enteritidis             | Enteritidis | 3888 | 50920 |
| SAL_HA0550AA | 16EP001384          | traces-OLiTwfJ |      |   | Europe        | Norway         | Enteritidis             | Enteritidis | 3888 | 50921 |
| SAL_HA0551AA | 16EP001290          | traces-ORAQIAN |      |   | Europe        | Norway         | Enteritidis             | Enteritidis | 3888 | 50538 |
| SAL_HA0552AA | 16EP001157          | traces-OyXdkXm |      |   | Europe        | Norway         | Enteritidis             | Enteritidis | 3941 | 49815 |
| SAL_HA0553AA | 16EP001080          | traces-OleTIht |      |   | Europe        | Norway         | Enteritidis             | Enteritidis | 3941 | 50922 |
| SAL_HA0554AA | 16EP001022          | traces-OSiFta  |      |   | Europe        | Norway         | Enteritidis             | Enteritidis | 3941 | 49815 |
| SAL_HA0555AA | 16EP001008          | traces-OZvNvwN |      |   | Europe        | Norway         | Enteritidis             | Enteritidis | 3888 | 50923 |
| SAL_HA0556AA | serovar enteritidis | SRR4421135     | 2015 | 2 | North America | Canada         | Enteritidis             | Enteritidis | 1425 | 51225 |

|              |                     |            |      |   |               |               |                         |             |       |       |
|--------------|---------------------|------------|------|---|---------------|---------------|-------------------------|-------------|-------|-------|
| SAL_HA0557AA | serovar enteritidis | SRR4421134 | 2015 | 2 | North America | Canada        | Enteritidis             | Enteritidis | 1425  | 51235 |
| SAL_HA0558AA | serovar enteritidis | SRR4421133 | 2015 | 2 | North America | Canada        | Enteritidis             | Enteritidis | 1425  | 51130 |
| SAL_HA0559AA | serovar enteritidis | SRR4421132 | 2015 | 2 | North America | Canada        | Enteritidis             | Enteritidis | 1425  | 51226 |
| SAL_HA0560AA | serovar enteritidis | SRR4421131 | 2015 | 2 | North America | Canada        | Enteritidis             | Enteritidis | 1425  | 51244 |
| SAL_HA0561AA | serovar enteritidis | SRR4421130 | 2015 | 2 | North America | Canada        | Enteritidis             | Enteritidis | 1425  | 51227 |
| SAL_HA0562AA | serovar enteritidis | SRR4421129 | 2015 | 2 | North America | Canada        | Enteritidis             | Enteritidis | 1425  | 51235 |
| SAL_HA0563AA | serovar enteritidis | SRR4421128 | 2015 | 2 | North America | Canada        | Enteritidis             | Enteritidis | 1425  | 51201 |
| SAL_HA0564AA | serovar enteritidis | SRR4421127 | 2015 | 3 | North America | Canada        | Enteritidis             | Enteritidis | 1425  | 23956 |
| SAL_HA0565AA | serovar enteritidis | SRR4421126 | 2015 | 2 | North America | Canada        | Enteritidis             | Enteritidis | 1425  | 51236 |
| SAL_HA0571AA | PNUSAS004453        | SRR4421095 |      |   | North America | United States | Enteritidis (Predicted) | Enteritidis | 1425  | 51185 |
| SAL_HA0604AA | 2014AM-0194         | SRR4420944 |      |   | North America | United States | Enteritidis (Predicted) | Enteritidis | 1425  | 48902 |
| SAL_HA0607AA | 2014AM-2800         | SRR4420941 |      |   | North America | United States | Enteritidis (Predicted) | Enteritidis | 1425  | 51219 |
| SAL_HA0631AA | 2014AM-2057         | SRR4420916 |      |   | North America | United States | Enteritidis (Predicted) | Enteritidis | 1425  | 51192 |
| SAL_HA0635AA | 2014AM-2534         | SRR4420911 |      |   | North America | United States | Enteritidis (Predicted) | Enteritidis | 1425  | 51161 |
| SAL_HA0637AA | 2014AM-0699         | SRR4420909 |      |   | North America | United States | Enteritidis (Predicted) | Enteritidis | 1425  | 51135 |
| SAL_HA0642AA | 2014AM-1411         | SRR4420904 |      |   | North America | United States | Enteritidis (Predicted) | Enteritidis | 26543 | 51208 |
| SAL_HA0644AA | 2014AM-1408         | SRR4420902 |      |   | North America | United States | Enteritidis (Predicted) | Enteritidis | 26543 | 51163 |
| SAL_HA0650AA | 2014AM-1407         | SRR4420896 |      |   | North America | United States | Enteritidis (Predicted) | Enteritidis | 1425  | 51127 |
| SAL_HA0651AA | 2014AM-1410         | SRR4420895 |      |   | North America | United States | Enteritidis (Predicted) | Enteritidis | 1425  | 51200 |
| SAL_HA0652AA | 2014AM-1409         | SRR4420861 |      |   | North America | United States | Enteritidis (Predicted) | Enteritidis | 1425  | 51199 |
| SAL_HA0654AA | 2014AM-0786         | SRR4420859 |      |   | North America | United States | Enteritidis (Predicted) | Enteritidis | 1425  | 51141 |
| SAL_HA0665AA | 2014AM-0529         | SRR4420838 |      |   | North America | United States | Enteritidis (Predicted) | Enteritidis | 1425  | 51149 |
| SAL_HA0671AA | 2014AM-0353         | SRR4420824 |      |   | North America | United States | Enteritidis (Predicted) | Enteritidis | 1425  | 51182 |
| SAL_HA0696AA | serovar enteritidis | SRR4420670 | 2015 | 2 | North America | Canada        | Enteritidis             | Enteritidis | 1425  | 51152 |
| SAL_HA0697AA | serovar enteritidis | SRR4420669 | 2015 | 2 | North America | Canada        | Enteritidis             | Enteritidis | 1425  | 51130 |
| SAL_HA0698AA | serovar enteritidis | SRR4420668 | 2015 | 2 | North America | Canada        | Enteritidis             | Enteritidis | 1425  | 51201 |
| SAL_HA0699AA | serovar enteritidis | SRR4420667 | 2015 | 1 | North America | Canada        | Enteritidis             | Enteritidis | 1425  | 51125 |
| SAL_HA0700AA | serovar enteritidis | SRR4420666 | 2015 | 1 | North America | Canada        | Enteritidis             | Enteritidis | 1425  | 51153 |
| SAL_HA0701AA | serovar enteritidis | SRR4420665 | 2015 | 2 | North America | Canada        | Enteritidis             | Enteritidis | 1425  | 51130 |
| SAL_HA0702AA | serovar enteritidis | SRR4420664 | 2015 | 2 | North America | Canada        | Enteritidis             | Enteritidis | 1425  | 23956 |
| SAL_HA0703AA | serovar enteritidis | SRR4420663 | 2015 | 2 | North America | Canada        | Enteritidis             | Enteritidis | 1425  | 51168 |
| SAL_HA0704AA | serovar enteritidis | SRR4420662 | 2015 | 1 | North America | Canada        | Enteritidis             | Enteritidis | 1425  | 51130 |
| SAL_HA0705AA | serovar enteritidis | SRR4420661 | 2015 | 1 | North America | Canada        | Enteritidis             | Enteritidis | 1425  | 51131 |
| SAL_HA0726AA | PNUSAS004491        | SRR4418399 |      |   | North America | United States | Enteritidis (Predicted) | Enteritidis | 1425  | 48035 |
| SAL_HA0729AA | PNUSAS004411        | SRR4418396 |      |   | North America | United States | Enteritidis (Predicted) | Enteritidis | 1425  | 51134 |
| SAL_HA0738AA | PNUSAS004410        | SRR4418386 |      |   | North America | United States | Enteritidis (Predicted) | Enteritidis | 1425  | 50789 |
| SAL_HA0739AA | PNUSAS004409        | SRR4418385 |      |   | North America | United States | Enteritidis (Predicted) | Enteritidis | 1425  | 51083 |
| SAL_HA0740AA | PNUSAS004542        | SRR4418384 |      |   | North America | United States | Enteritidis (Predicted) | Enteritidis | 1425  | 51082 |
| SAL_HA0741AA | PNUSAS004541        | SRR4418383 |      |   | North America | United States | Enteritidis (Predicted) | Enteritidis | 1425  | 51081 |
| SAL_HA0752AA | PNUSAS004442        | SRR4418372 |      |   | North America | United States | Enteritidis (Predicted) | Enteritidis | 1425  | 51091 |
| SAL_HA0764AA | 2016K-0889          | SRR4418360 |      |   | North America | United States | Enteritidis (Predicted) | Enteritidis | 1425  | 50789 |
| SAL_HA0765AA | 2016K-0888          | SRR4418359 |      |   | North America | United States | Enteritidis (Predicted) | Enteritidis | 1425  | 50789 |
| SAL_HA0766AA | 2016K-0890          | SRR4418358 |      |   | North America | United States | Enteritidis (Predicted) | Enteritidis | 1425  | 51081 |
| SAL_HA0777AA | PNUSAS004405        | SRR4418347 |      |   | North America | United States | Enteritidis (Predicted) | Enteritidis | 1425  | 51093 |
| SAL_HA0841AA | FDA00008291         | SRR4418787 | 2014 | 8 | North America | United States | Enteritidis             | Enteritidis | 46583 | 51025 |
| SAL_HA0862AA | PNUSAS004125        | SRR4416110 | 2016 | 8 | North America | United States | Enteritidis             | Enteritidis | 27863 | 50987 |
| SAL_HA0863AA | PNUSAS004124        | SRR4416109 | 2016 | 8 | North America | United States | Enteritidis             | Enteritidis | 1425  | 51005 |
| SAL_HA0865AA | PNUSAS004122        | SRR4416107 | 2016 | 8 | North America | United States | Enteritidis             | Enteritidis | 1425  | 50986 |
| SAL_HA0866AA | PNUSAS004121        | SRR4416106 |      |   | North America | United States | Enteritidis (Predicted) | Enteritidis | 1425  | 51007 |
| SAL_HA0868AA | PNUSAS004119        | SRR4416104 |      |   | North America | United States | Enteritidis (Predicted) | Enteritidis | 1425  | 50990 |
| SAL_HA0873AA | PNUSAS004300        | SRR4416099 |      |   | North America | United States | Enteritidis (Predicted) | Enteritidis | 1425  | 49135 |
| SAL_HA0874AA | PNUSAS004299        | SRR4416098 |      |   | North America | United States | Enteritidis (Predicted) | Enteritidis | 1425  | 50994 |
| SAL_HA0884AA | PNUSAS004261        | SRR4416023 |      |   | North America | United States | Enteritidis             | Enteritidis | 1425  | 50968 |
| SAL_HA0891AA | PNUSAS004254        | SRR4416008 | 2016 | 8 | North America | United States | Javiana                 | Enteritidis | 1425  | 50970 |
| SAL_HA0906AA | PNUSAS004292        | SRR4415993 |      |   | North America | United States | Enteritidis (Predicted) | Enteritidis | 1425  | 1171  |
| SAL_HA0926AA | PNUSAS003817        | SRR4415973 |      |   | North America | United States | Enteritidis (Predicted) | Enteritidis | 1425  | 50957 |
| SAL_HA0937AA | PNUSAS003805        | SRR4415962 |      |   | North America | United States | Enteritidis (Predicted) | Enteritidis | 1425  | 50930 |
